# Supplementary material for: Effects of common mutations in the SARS-CoV-2 Spike RBD and its ligand, the human ACE2 receptor on binding affinity and kinetics
Source: eLife. 2021 Aug 26;10:e70658. doi: 10.7554/eLife.70658 (PMC8480977; doi:10.7554/eLife.70658)
Supplement: Figure 2—figure supplement 2—source data 1. [file elife-70658-fig2-figsupp2-data1.xlsx]

## Sheet: Figure_S3_A
		[RBD]	koff
		3.23125	0.02344*
		6.4625	0.04259*
		12.925	0.06489
		25.85	0.06085
		51.7	0.06576
		103.4	0.06792
		206.8	0.067
		413.6	0.06718
		3.23125	1.062e-007*

## Sheet: Figure_S3_B
		[RBD]	kobs (s-1)
		3.23125	0.8518*
		6.4625	0.05791*
		12.925	0.05961
		25.85	0.1004
		51.7	0.1102
		103.4	0.15
		206.8	0.2765
		413.6	0.4252
		3.23125
