# Supplementary material for: Effects of common mutations in the SARS-CoV-2 Spike RBD and its ligand, the human ACE2 receptor on binding affinity and kinetics
Source: eLife. 2021 Aug 26;10:e70658. doi: 10.7554/eLife.70658 (PMC8480977; doi:10.7554/eLife.70658)
Supplement: Figure 2—source data 1. [file elife-70658-fig2-data1.xlsx]

## Sheet: Figure_2_A
		Time	3.23125	6.4625	12.9	25.9	51.7	103	207	414 nM	3.23125
		-50	-0.044*	0.172*	-0.014	0.036	-0.118	-0.254	-0.114	0.104	-0.032*
		-49.9	-0.044*	0.172*	-0.014	0.036	-0.118	-0.254	-0.014	0.104	-0.132*
		-49.8	-0.044*	0.172*	0.086	0.036	-0.018	-0.154	-0.014	0.104	-0.132*
		-49.7	-0.044*	0.172*	0.086	0.036	-0.018	-0.154	-0.014	0.104	-0.032*
		-49.6	-0.044*	0.272*	0.086	0.136	-0.018	-0.154	-0.114	0.004	-0.032*
		-49.5	-0.044*	0.172*	0.086	0.136	-0.118	-0.254	-0.114	0.104	-0.032*
		-49.4	-0.044*	0.072*	-0.014	0.036	-0.118	-0.354	-0.014	0.104	-0.032*
		-49.3	-0.044*	0.172*	-0.114	-0.064	-0.118	-0.354	-0.014	0.104	-0.032*
		-49.2	-0.044*	0.172*	-0.014	-0.064	-0.118	-0.354	0.086	0.204	-0.032*
		-49.1	-0.044*	0.172*	0.086	0.036	-0.118	-0.354	0.086	0.204	-0.032*
		-49	-0.044*	0.172*	0.086	0.036	-0.218	-0.354	-0.014	0.104	-0.132*
		-48.9	-0.044*	0.172*	-0.014	0.036	-0.018	-0.254	0.086	0.104	-0.032*
		-48.8	-0.144*	0.072*	-0.014	0.036	-0.018	-0.254	-0.014	0.104	-0.032*
		-48.7	-0.044*	0.272*	0.086	0.036	-0.018	-0.254	-0.014	0.104	-0.032*
		-48.6	-0.044*	0.272*	0.186	0.036	-0.118	-0.454	0.086	0.204	-0.032*
		-48.5	-0.044*	0.272*	-0.014	-0.064	-0.218	-0.454	0.086	0.204	-0.032*
		-48.4	-0.044*	0.272*	-0.014	0.036	-0.118	-0.454	0.086	0.204	-0.032*
		-48.3	-0.044*	0.172*	-0.014	0.036	-0.118	-0.354	0.086	0.204	-0.032*
		-48.2	-0.044*	0.172*	0.086	0.036	-0.118	-0.354	0.086	0.204	-0.132*
		-48.1	-0.044*	0.172*	-0.014	-0.064	-0.118	-0.354	-0.014	0.204	-0.132*
		-48	0.056*	0.172*	-0.014	-0.064	-0.018	-0.354	0.086	0.204	-0.132*
		-47.9	-0.044*	0.172*	0.086	0.036	-0.018	-0.254	0.086	0.104	-0.132*
		-47.8	-0.044*	0.172*	0.086	-0.064	-0.018	-0.254	0.086	0.104	-0.132*
		-47.7	-0.044*	0.172*	0.086	-0.064	-0.118	-0.354	0.186	0.304	-0.132*
		-47.6	-0.044*	0.272*	0.086	-0.064	-0.218	-0.454	-0.014	0.204	-0.032*
		-47.5	0.056*	0.272*	0.086	0.036	-0.118	-0.354	0.086	0.204	-0.132*
		-47.4	-0.044*	0.172*	-0.014	-0.064	-0.018	-0.254	0.086	0.204	-0.132*
		-47.3	-0.044*	0.172*	-0.014	-0.064	-0.118	-0.354	-0.014	0.104	-0.132*
		-47.2	0.056*	0.272*	-0.014	-0.164	-0.018	-0.354	-0.014	0.204	-0.132*
		-47.1	0.056*	0.372*	0.086	0.036	-0.018	-0.254	-0.014	0.204	-0.132*
		-47	-0.044*	0.272*	0.086	-0.064	-0.118	-0.254	-0.014	0.104	-0.132*
		-46.9	-0.044*	0.272*	0.086	-0.064	-0.218	-0.354	-0.014	0.104	-0.232*
		-46.8	-0.044*	0.172*	0.086	-0.064	-0.118	-0.254	-0.014	0.204	-0.132*
		-46.7	0.056*	0.272*	0.186	-0.064	-0.118	-0.254	0.086	0.304	-0.132*
		-46.6	0.056*	0.272*	0.186	-0.064	-0.118	-0.354	0.086	0.104	-0.132*
		-46.5	-0.044*	0.172*	-0.014	-0.064	-0.118	-0.354	0.086	0.104	-0.232*
		-46.4	-0.044*	0.172*	-0.014	-0.064	-0.118	-0.354	0.086	0.104	-0.332*
		-46.3	0.056*	0.172*	-0.014	-0.064	-0.018	-0.254	0.086	0.204	-0.232*
		-46.2	-0.044*	0.272*	0.086	-0.064	-0.018	-0.254	-0.014	0.104	-0.132*
		-46.1	0.056*	0.372*	0.086	-0.064	-0.118	-0.254	-0.014	0.104	-0.132*
		-46	-0.044*	0.272*	0.186	0.036	-0.118	-0.254	-0.014	0.104	-0.132*
		-45.9	0.056*	0.172*	0.086	-0.064	-0.118	-0.254	-0.014	0.104	-0.132*
		-45.8	0.056*	0.272*	0.086	-0.064	-0.118	-0.154	-0.014	0.204	-0.232*
		-45.7	0.056*	0.272*	0.086	-0.064	-0.018	-0.254	-0.014	0.204	-0.332*
		-45.6	-0.044*	0.272*	-0.014	-0.064	-0.118	-0.354	0.086	0.304	-0.232*
		-45.5	-0.044*	0.272*	-0.014	-0.064	-0.118	-0.354	-0.114	0.104	-0.232*
		-45.4	0.056*	0.372*	0.086	0.036	-0.118	-0.254	-0.014	0.104	-0.132*
		-45.3	0.056*	0.272*	0.086	-0.064	-0.118	-0.254	-0.014	0.104	-0.132*
		-45.2	-0.044*	0.172*	0.086	-0.064	-0.118	-0.154	-0.114	0.004	-0.132*
		-45.1	0.056*	0.272*	0.186	0.036	-0.118	-0.254	-0.114	-0.096	-0.232*
		-45	-0.044*	0.272*	0.186	0.036	-0.118	-0.354	-0.114	0.004	-0.232*
		-44.9	-0.044*	0.172*	0.286	0.036	-0.118	-0.454	-0.114	0.004	-0.232*
		-44.8	0.156*	0.272*	0.186	0.036	-0.118	-0.454	-0.114	0.004	-0.332*
		-44.7	0.156*	0.272*	0.186	-0.064	-0.118	-0.554	-0.214	-0.196	-0.432*
		-44.6	0.156*	0.272*	0.186	-0.164	-0.118	-0.654	-0.214	-0.296	-0.332*
		-44.5	0.056*	0.272*	0.186	-0.164	-0.118	-0.554	-0.014	-0.196	-0.332*
		-44.4	0.056*	0.172*	0.186	-0.064	-0.018	-0.554	-0.114	-0.196	-0.132*
		-44.3	0.056*	0.172*	0.286	-0.064	-0.218	-0.554	-0.114	-0.096	-0.232*
		-44.2	-0.044*	0.172*	0.286	0.036	-0.218	-0.354	-0.014	0.004	-0.232*
		-44.1	0.056*	0.272*	0.086	-0.064	-0.218	-0.154	-0.114	-0.096	-0.232*
		-44	0.056*	0.272*	-0.014	-0.164	-0.118	-0.154	-0.014	0.004	-0.132*
		-43.9	-0.144*	0.272*	-0.114	-0.164	-0.118	-0.054	0.186	0.204	-0.232*
		-43.8	-0.144*	0.272*	-0.014	-0.064	-0.118	-0.054	0.286	0.304	-0.132*
		-43.7	-0.244*	0.172*	-0.114	-0.264	-0.218	0.046	0.186	0.204	0.068*
		-43.6	-0.244*	0.172*	0.086	-0.064	-0.218	-0.154	0.186	0.104	-0.032*
		-43.5	-0.144*	0.172*	0.086	0.036	-0.218	-0.154	0.186	0.104	-0.032*
		-43.4	-0.044*	0.272*	0.086	0.036	-0.318	-0.254	0.086	0.004	-0.132*
		-43.3	-0.044*	0.372*	-0.014	0.036	-0.218	-0.254	0.186	0.204	-0.132*
		-43.2	-0.144*	0.172*	-0.014	0.036	-0.118	-0.154	0.286	0.104	-0.232*
		-43.1	-0.144*	0.172*	-0.014	-0.064	-0.018	-0.254	0.086	0.004	-0.132*
		-43	-0.144*	0.172*	0.086	-0.064	-0.118	-0.254	0.086	0.004	-0.032*
		-42.9	-0.144*	0.172*	0.186	0.036	-0.218	-0.354	0.186	0.004	-0.032*
		-42.8	-0.144*	0.172*	0.086	0.036	-0.118	-0.254	0.186	0.004	-0.132*
		-42.7	-0.144*	0.272*	-0.014	-0.064	-0.118	-0.254	0.186	-0.096	-0.132*
		-42.6	-0.144*	0.272*	-0.014	-0.064	-0.118	-0.154	0.086	0.004	-0.232*
		-42.5	-0.144*	0.172*	0.086	0.036	-0.118	-0.254	0.086	0.004	-0.032*
		-42.4	-0.144*	0.172*	0.086	-0.064	-0.218	-0.354	0.086	0.004	-0.032*
		-42.3	-0.044*	0.272*	0.086	-0.064	-0.118	-0.354	0.086	0.004	-0.032*
		-42.2	-0.144*	0.272*	0.086	-0.064	-0.118	-0.254	0.186	0.004	-0.132*
		-42.1	-0.244*	0.172*	0.086	0.036	-0.118	-0.254	0.086	-0.096	-0.132*
		-42	-0.244*	0.172*	-0.014	0.036	-0.118	-0.254	0.086	-0.096	-0.132*
		-41.9	-0.144*	0.272*	-0.014	0.036	-0.018	-0.254	0.186	0.004	-0.132*
		-41.8	-0.044*	0.372*	-0.014	0.036	-0.118	-0.254	0.186	0.004	-0.032*
		-41.7	-0.044*	0.372*	-0.014	-0.064	-0.018	-0.254	0.286	0.104	-0.032*
		-41.6	-0.144*	0.272*	-0.014	0.036	-0.118	-0.154	0.286	0.104	-0.032*
		-41.5	-0.144*	0.272*	0.086	0.136	-0.018	-0.154	0.086	0.004	-0.032*
		-41.4	-0.144*	0.172*	0.086	0.136	-0.018	-0.154	0.086	0.004	-0.032*
		-41.3	-0.144*	0.272*	0.086	0.136	-0.118	-0.254	0.086	0.004	-0.032*
		-41.2	-0.144*	0.172*	-0.014	-0.064	-0.118	-0.254	0.086	0.004	0.068*
		-41.1	-0.144*	0.172*	-0.014	-0.064	-0.118	-0.354	0.086	0.104	-0.132*
		-41	-0.044*	0.272*	0.086	-0.064	-0.018	-0.254	0.086	0.104	-0.032*
		-40.9	-0.144*	0.272*	0.086	-0.064	-0.018	-0.354	0.186	0.104	-0.032*
		-40.8	-0.144*	0.272*	0.086	0.136	-0.018	-0.254	0.186	0.104	-0.032*
		-40.7	-0.144*	0.172*	-0.014	0.036	-0.018	-0.254	0.186	0.004	-0.132*
		-40.6	-0.144*	0.172*	-0.014	0.036	-0.018	-0.254	0.186	0.004	-0.132*
		-40.5	-0.144*	0.172*	-0.014	0.036	-0.018	-0.254	0.186	0.004	-0.132*
		-40.4	-0.144*	0.172*	-0.014	0.036	-0.118	-0.354	0.086	0.004	-0.032*
		-40.3	-0.144*	0.172*	-0.014	0.036	-0.218	-0.354	0.186	0.004	-0.032*
		-40.2	-0.244*	0.072*	-0.014	0.036	-0.218	-0.254	0.086	0.004	-0.032*
		-40.1	-0.144*	0.072*	0.086	0.136	-0.118	-0.354	0.086	0.004	-0.032*
		-40	-0.144*	0.072*	-0.014	-0.064	-0.118	-0.354	0.086	0.004	-0.132*
		-39.9	-0.144*	0.072*	-0.014	-0.064	-0.118	-0.354	0.086	0.004	-0.132*
		-39.8	-0.044*	0.172*	-0.114	-0.064	-0.118	-0.354	0.086	0.004	-0.132*
		-39.7	-0.144*	0.272*	-0.114	-0.064	-0.218	-0.454	0.086	-0.096	-0.132*
		-39.6	-0.144*	0.272*	-0.014	0.036	-0.118	-0.254	0.086	-0.096	-0.132*
		-39.5	-0.044*	0.172*	-0.014	0.036	-0.118	-0.254	0.186	0.004	-0.132*
		-39.4	-0.144*	0.072*	-0.014	0.036	-0.118	-0.254	0.186	0.004	-0.132*
		-39.3	-0.144*	0.072*	0.086	0.036	-0.018	-0.254	0.186	0.004	-0.132*
		-39.2	-0.144*	0.072*	0.086	0.136	-0.118	-0.254	0.086	0.004	-0.032*
		-39.1	-0.144*	0.072*	-0.014	0.036	-0.118	-0.254	0.086	0.004	-0.032*
		-39	-0.144*	0.172*	-0.114	0.036	-0.118	-0.254	0.086	0.004	-0.032*
		-38.9	-0.044*	0.272*	-0.114	0.036	-0.118	-0.154	0.186	0.104	-0.032*
		-38.8	0.056*	0.272*	-0.014	0.036	-0.218	-0.254	0.186	0.104	-0.032*
		-38.7	-0.044*	0.172*	0.086	0.136	-0.118	-0.154	0.086	0.004	-0.132*
		-38.6	-0.144*	0.072*	0.086	0.036	-0.118	-0.154	0.086	0.004	-0.132*
		-38.5	-0.144*	0.072*	0.086	0.036	-0.018	-0.154	0.186	0.104	-0.132*
		-38.4	-0.144*	0.072*	0.086	0.136	-0.018	-0.154	0.186	0.104	-0.132*
		-38.3	-0.144*	0.072*	-0.014	0.036	-0.018	-0.154	0.186	0.104	-0.132*
		-38.2	-0.144*	0.072*	-0.014	0.036	-0.018	-0.254	0.286	0.204	-0.132*
		-38.1	-0.044*	0.072*	-0.014	0.036	-0.018	-0.154	0.286	0.204	-0.132*
		-38	-0.044*	0.172*	-0.114	0.036	-0.018	-0.154	0.286	0.104	-0.232*
		-37.9	-0.044*	0.172*	-0.014	0.036	-0.018	-0.154	0.286	0.104	-0.032*
		-37.8	-0.044*	0.172*	-0.014	0.036	-0.118	-0.254	0.186	0.104	-0.032*
		-37.7	-0.044*	0.172*	-0.014	0.036	-0.118	-0.254	0.086	0.004	-0.032*
		-37.6	-0.044*	0.172*	-0.014	0.036	-0.218	-0.254	0.086	0.004	-0.032*
		-37.5	-0.044*	0.172*	-0.114	0.036	-0.118	-0.254	0.086	0.104	-0.032*
		-37.4	-0.044*	0.172*	-0.014	0.136	-0.118	-0.254	0.186	0.204	-0.032*
		-37.3	-0.044*	0.272*	-0.014	0.036	-0.018	-0.054	0.286	0.204	-0.032*
		-37.2	0.056*	0.272*	0.086	0.036	-0.118	-0.154	0.286	0.204	-0.032*
		-37.1	0.056*	0.272*	0.086	0.036	-0.118	-0.154	0.286	0.204	-0.032*
		-37	0.056*	0.172*	0.086	0.036	-0.118	-0.254	0.286	0.204	-0.032*
		-36.9	-0.044*	0.172*	0.086	0.036	-0.118	-0.254	0.186	0.104	-0.032*
		-36.8	-0.044*	0.172*	-0.014	-0.064	-0.018	-0.254	0.186	0.204	-0.032*
		-36.7	-0.044*	0.272*	-0.014	0.036	-0.018	-0.254	0.186	0.204	-0.032*
		-36.6	-0.044*	0.272*	-0.014	0.036	-0.018	-0.254	0.186	0.104	-0.032*
		-36.5	-0.144*	0.172*	0.086	0.036	-0.118	-0.254	0.086	0.104	-0.032*
		-36.4	-0.144*	0.172*	0.086	0.036	-0.118	-0.154	0.186	0.104	-0.132*
		-36.3	-0.144*	0.172*	-0.014	0.036	-0.118	-0.154	0.186	0.104	-0.032*
		-36.2	-0.144*	0.172*	-0.014	0.036	-0.118	-0.154	0.086	0.004	-0.032*
		-36.1	-0.144*	0.172*	-0.014	0.036	-0.118	-0.154	0.086	0.004	0.068*
		-36	-0.044*	0.172*	-0.014	0.036	-0.118	-0.154	0.086	0.004	0.068*
		-35.9	-0.044*	0.172*	0.086	0.236	-0.118	-0.154	0.186	0.104	-0.032*
		-35.8	-0.044*	0.072*	0.186	0.236	-0.118	-0.154	0.186	0.104	-0.032*
		-35.7	-0.044*	0.172*	0.086	0.036	-0.118	-0.254	0.186	0.204	-0.032*
		-35.6	-0.044*	0.172*	0.086	0.036	-0.118	-0.254	0.186	0.204	-0.032*
		-35.5	-0.044*	0.172*	0.086	0.036	-0.018	-0.154	0.086	0.104	-0.032*
		-35.4	-0.044*	0.172*	0.086	0.036	-0.018	-0.054	0.086	0.104	-0.032*
		-35.3	-0.144*	0.172*	0.086	0.036	-0.018	-0.054	0.086	0.104	-0.032*
		-35.2	-0.144*	0.172*	0.086	0.036	-0.018	-0.154	0.186	0.104	0.068*
		-35.1	-0.144*	0.172*	0.086	0.036	-0.018	-0.154	0.086	0.104	0.068*
		-35	-0.144*	0.172*	0.186	0.036	-0.018	-0.154	0.086	0.104	-0.032*
		-34.9	-0.044*	0.172*	0.186	0.036	-0.018	-0.154	0.186	0.204	-0.132*
		-34.8	-0.044*	0.272*	0.086	0.036	-0.118	-0.154	0.186	0.204	-0.132*
		-34.7	-0.044*	0.272*	0.086	0.036	-0.118	-0.154	0.186	0.204	-0.132*
		-34.6	-0.044*	0.272*	0.086	0.036	-0.118	-0.154	0.086	0.204	-0.132*
		-34.5	-0.044*	0.172*	0.086	0.036	-0.118	-0.154	0.086	0.104	-0.132*
		-34.4	-0.044*	0.172*	0.086	0.036	-0.118	-0.154	0.186	0.104	-0.132*
		-34.3	-0.044*	0.172*	0.086	0.036	-0.118	-0.154	0.186	0.104	-0.132*
		-34.2	-0.044*	0.172*	0.186	0.136	-0.118	-0.154	0.186	0.104	0.068*
		-34.1	-0.044*	0.172*	0.186	0.136	-0.118	-0.054	0.186	0.104	-0.032*
		-34	0.056*	0.172*	-0.014	-0.064	-0.018	-0.054	0.186	0.104	-0.032*
		-33.9	0.056*	0.172*	0.086	-0.064	-0.018	-0.054	0.186	0.104	-0.032*
		-33.8	0.056*	0.272*	0.086	0.036	-0.018	-0.154	0.186	0.204	-0.032*
		-33.7	0.056*	0.272*	0.086	0.036	-0.018	-0.154	0.186	0.204	-0.032*
		-33.6	0.056*	0.272*	0.086	0.036	-0.018	-0.154	0.286	0.204	-0.032*
		-33.5	0.056*	0.272*	0.086	0.036	-0.018	-0.054	0.286	0.204	-0.032*
		-33.4	0.056*	0.272*	0.086	0.036	-0.018	-0.054	0.186	0.204	-0.032*
		-33.3	0.056*	0.272*	0.186	0.036	0.082	-0.054	0.186	0.204	-0.032*
		-33.2	0.056*	0.272*	0.186	0.036	0.082	-0.054	0.186	0.204	-0.032*
		-33.1	0.156*	0.172*	0.186	0.036	0.082	-0.054	0.086	0.104	-0.032*
		-33	-0.044*	0.172*	0.086	0.036	0.082	-0.054	0.086	0.104	-0.032*
		-32.9	-0.044*	0.172*	0.086	0.036	0.082	-0.054	0.086	0.104	-0.032*
		-32.8	-0.044*	0.172*	0.086	-0.064	-0.018	-0.054	0.186	0.204	-0.132*
		-32.7	-0.044*	0.172*	-0.014	-0.064	-0.018	-0.154	0.186	0.104	-0.032*
		-32.6	0.056*	0.272*	-0.014	-0.064	-0.018	-0.154	0.186	0.104	-0.032*
		-32.5	0.056*	0.272*	-0.014	-0.064	-0.018	-0.154	0.186	0.104	-0.032*
		-32.4	0.056*	0.272*	-0.014	-0.064	-0.018	-0.154	0.186	0.104	-0.032*
		-32.3	0.056*	0.172*	-0.014	-0.064	-0.018	-0.154	0.286	0.204	-0.132*
		-32.2	0.056*	0.272*	-0.014	-0.064	-0.018	-0.154	0.286	0.204	-0.132*
		-32.1	0.056*	0.272*	0.086	0.036	0.082	-0.054	0.286	0.204	-0.132*
		-32	0.056*	0.272*	0.086	0.036	-0.018	-0.154	0.186	0.204	-0.032*
		-31.9	0.056*	0.172*	0.086	0.036	-0.018	-0.054	0.186	0.204	-0.032*
		-31.8	0.156*	0.272*	0.086	0.036	0.082	-0.054	0.186	0.204	0.068*
		-31.7	0.056*	0.172*	0.086	0.036	0.082	-0.054	0.186	0.204	0.068*
		-31.6	0.056*	0.172*	0.086	0.036	0.082	-0.054	0.186	0.204	0.068*
		-31.5	0.056*	0.172*	-0.014	-0.064	0.082	-0.054	0.186	0.304	0.068*
		-31.4	0.156*	0.172*	-0.014	-0.164	-0.018	-0.054	0.186	0.304	-0.132*
		-31.3	0.156*	0.172*	-0.014	-0.064	-0.018	-0.054	0.086	0.104	-0.132*
		-31.2	0.056*	0.172*	0.086	0.036	0.082	0.046	0.086	0.104	-0.132*
		-31.1	0.056*	0.272*	0.086	0.036	-0.018	-0.054	0.186	0.104	-0.032*
		-31	0.056*	0.272*	0.086	0.036	0.082	-0.054	0.186	0.104	-0.032*
		-30.9	-0.044*	0.172*	0.086	0.036	0.082	-0.054	0.186	0.104	-0.032*
		-30.8	-0.044*	0.172*	0.086	0.036	0.082	-0.054	0.186	0.204	0.068*
		-30.7	-0.044*	0.172*	0.086	0.036	0.082	-0.054	0.186	0.204	-0.032*
		-30.6	0.156*	0.272*	-0.014	-0.064	0.082	-0.054	0.086	0.104	-0.032*
		-30.5	0.156*	0.272*	-0.014	-0.064	0.082	-0.054	0.086	0.104	-0.032*
		-30.4	0.156*	0.272*	-0.014	0.036	0.082	-0.054	0.186	0.204	0.068*
		-30.3	0.156*	0.272*	0.086	0.036	0.082	-0.054	0.186	0.204	0.068*
		-30.2	0.156*	0.272*	0.086	0.036	0.082	-0.154	0.186	0.204	0.068*
		-30.1	0.156*	0.272*	0.086	-0.064	0.082	-0.154	0.186	0.304	-0.032*
		-30	0.056*	0.272*	0.086	-0.064	0.082	-0.154	0.186	0.304	-0.032*
		-29.9	0.156*	0.272*	0.186	0.036	-0.018	-0.154	0.186	0.204	-0.132*
		-29.8	0.056*	0.172*	0.086	0.036	-0.018	-0.154	0.086	0.104	-0.132*
		-29.7	0.056*	0.172*	-0.014	-0.064	0.082	-0.054	0.086	0.104	0.068*
		-29.6	0.056*	0.172*	-0.014	0.036	0.082	-0.054	0.086	0.104	0.068*
		-29.5	0.056*	0.272*	-0.014	0.036	0.082	0.046	0.086	0.104	0.068*
		-29.4	0.156*	0.372*	-0.014	0.036	0.082	0.046	0.086	0.104	0.068*
		-29.3	0.156*	0.272*	-0.014	0.036	0.082	0.046	0.086	0.104	0.068*
		-29.2	0.056*	0.172*	0.086	0.036	0.082	0.046	0.186	0.104	-0.032*
		-29.1	0.056*	0.172*	0.086	0.036	-0.018	-0.154	0.186	0.104	-0.032*
		-29	0.156*	0.172*	0.086	0.036	-0.018	-0.154	0.086	0.004	0.068*
		-28.9	0.156*	0.172*	0.086	0.036	0.082	-0.154	0.086	0.004	0.068*
		-28.8	0.156*	0.172*	0.186	0.136	-0.018	-0.054	0.086	0.004	0.068*
		-28.7	0.156*	0.272*	0.186	0.036	-0.018	-0.054	0.186	0.204	0.068*
		-28.6	0.156*	0.272*	0.186	0.036	0.082	0.046	0.086	0.204	-0.032*
		-28.5	0.156*	0.172*	0.186	0.036	0.082	0.046	0.086	0.204	-0.032*
		-28.4	0.156*	0.172*	0.086	0.036	0.082	0.046	0.186	0.204	0.068*
		-28.3	0.056*	0.072*	0.086	0.036	0.082	0.046	0.186	0.204	0.068*
		-28.2	0.056*	0.172*	0.086	0.036	0.182	0.046	0.086	0.104	0.068*
		-28.1	0.156*	0.272*	0.086	0.136	0.082	0.046	0.086	0.004	0.068*
		-28	0.156*	0.272*	0.086	0.136	0.082	-0.054	0.086	0.104	0.068*
		-27.9	0.156*	0.272*	0.086	0.036	0.082	-0.054	0.086	0.104	0.068*
		-27.8	0.256*	0.272*	0.186	0.136	-0.018	-0.054	0.186	0.104	0.068*
		-27.7	0.256*	0.272*	0.186	0.036	-0.018	-0.054	0.186	0.104	-0.032*
		-27.6	0.256*	0.272*	0.186	0.136	-0.018	-0.054	0.086	0.104	0.068*
		-27.5	0.156*	0.172*	0.186	0.136	0.082	0.046	0.086	0.204	0.068*
		-27.4	0.056*	0.172*	0.186	0.136	-0.018	0.046	0.086	0.104	0.068*
		-27.3	0.056*	0.172*	0.286	0.136	-0.018	0.046	0.086	0.104	0.068*
		-27.2	0.156*	0.172*	0.286	0.136	-0.018	0.046	0.086	0.104	0.068*
		-27.1	0.156*	0.272*	0.086	0.036	0.082	0.046	0.186	0.104	-0.032*
		-27	0.156*	0.272*	0.086	0.036	-0.018	0.046	0.186	0.204	-0.032*
		-26.9	0.156*	0.272*	0.086	0.036	-0.018	-0.054	0.186	0.204	0.068*
		-26.8	0.156*	0.272*	0.086	0.036	-0.018	-0.054	0.186	0.104	0.068*
		-26.7	0.256*	0.172*	0.186	0.036	-0.118	-0.054	0.186	0.104	0.068*
		-26.6	0.256*	0.172*	0.186	0.036	-0.118	-0.054	0.186	0.104	-0.032*
		-26.5	0.256*	0.172*	0.286	0.236	-0.018	-0.054	0.186	0.104	-0.032*
		-26.4	0.256*	0.272*	0.286	0.236	-0.018	-0.054	0.086	0.104	-0.032*
		-26.3	0.056*	0.172*	0.086	0.136	-0.018	0.046	0.086	0.104	0.068*
		-26.2	0.056*	0.172*	0.086	0.136	-0.118	0.046	0.086	0.104	0.068*
		-26.1	0.156*	0.272*	0.186	0.136	-0.018	0.046	0.186	0.104	0.068*
		-26	0.256*	0.272*	0.186	0.136	-0.018	0.046	0.286	0.104	0.068*
		-25.9	0.156*	0.172*	0.186	0.236	-0.018	0.046	0.186	0.204	-0.032*
		-25.8	0.156*	0.072*	0.186	0.236	-0.018	0.046	0.186	0.204	-0.032*
		-25.7	0.156*	0.172*	0.086	0.036	-0.118	-0.054	0.086	0.104	-0.132*
		-25.6	0.156*	0.172*	0.086	0.036	0.082	0.046	0.186	0.104	0.068*
		-25.5	0.156*	0.172*	0.186	0.136	-0.018	-0.054	0.186	0.104	0.068*
		-25.4	0.256*	0.172*	0.186	0.236	-0.018	0.046	0.186	0.104	0.068*
		-25.3	0.156*	0.172*	0.186	0.236	-0.018	0.046	0.186	0.104	-0.032*
		-25.2	0.056*	0.072*	0.186	0.236	-0.118	-0.054	0.286	0.204	-0.032*
		-25.1	0.156*	0.172*	0.186	0.236	-0.018	-0.054	0.286	0.104	0.068*
		-25	0.156*	0.272*	0.086	0.136	-0.018	-0.054	0.286	0.004	0.068*
		-24.9	0.156*	0.272*	0.186	0.136	-0.018	-0.054	0.286	0.004	0.168*
		-24.8	0.156*	0.272*	0.186	0.136	-0.118	-0.154	0.286	0.004	-0.032*
		-24.7	0.156*	0.072*	0.186	0.136	-0.018	-0.054	0.286	0.004	-0.032*
		-24.6	0.156*	0.072*	0.186	0.136	-0.118	-0.054	0.186	0.004	-0.032*
		-24.5	0.156*	0.072*	-0.014	0.036	-0.018	0.046	0.186	0.004	-0.032*
		-24.4	0.156*	0.072*	0.086	0.236	-0.018	0.046	0.086	-0.096	-0.032*
		-24.3	0.156*	0.172*	0.086	0.236	-0.118	-0.054	0.186	0.104	-0.032*
		-24.2	0.056*	0.072*	0.086	0.236	-0.118	-0.054	0.186	0.104	-0.032*
		-24.1	0.056*	0.072*	0.086	0.236	-0.118	-0.054	0.186	0.104	-0.032*
		-24	0.056*	0.072*	0.086	0.236	-0.118	-0.154	0.286	0.104	0.068*
		-23.9	0.056*	0.072*	0.086	0.236	-0.018	-0.054	0.286	0.104	-0.032*
		-23.8	0.056*	0.072*	0.086	0.136	-0.018	-0.154	0.286	0.104	-0.032*
		-23.7	0.156*	0.172*	0.086	0.036	-0.018	-0.154	0.286	0.004	-0.032*
		-23.6	0.056*	0.072*	0.086	0.036	-0.018	-0.054	0.186	-0.096	-0.132*
		-23.5	0.056*	0.072*	0.086	0.036	-0.018	-0.054	0.086	-0.096	-0.132*
		-23.4	0.156*	0.072*	0.086	0.136	-0.018	-0.054	0.086	-0.096	-0.132*
		-23.3	0.156*	0.072*	0.086	0.136	-0.018	-0.054	0.086	-0.096	-0.132*
		-23.2	0.156*	0.072*	0.186	0.236	-0.018	-0.054	0.086	-0.096	-0.132*
		-23.1	0.156*	0.072*	0.186	0.236	-0.218	-0.154	0.086	-0.096	-0.032*
		-23	0.056*	0.072*	-0.014	0.136	-0.218	-0.154	0.086	-0.096	-0.132*
		-22.9	-0.044*	-0.028*	0.086	0.136	-0.218	-0.154	0.086	-0.096	-0.132*
		-22.8	-0.044*	-0.028*	0.086	0.136	-0.218	-0.154	0.086	-0.096	-0.132*
		-22.7	-0.044*	-0.028*	0.086	0.136	-0.218	-0.254	0.086	-0.096	-0.132*
		-22.6	0.056*	0.072*	0.086	0.136	-0.218	-0.254	-0.014	-0.096	-0.132*
		-22.5	0.056*	0.072*	0.086	0.136	-0.118	-0.154	0.086	-0.096	-0.132*
		-22.4	0.056*	0.072*	0.086	0.036	-0.018	-0.154	-0.014	-0.196	-0.032*
		-22.3	0.056*	0.072*	0.086	0.036	-0.018	-0.154	-0.014	-0.196	-0.032*
		-22.2	0.056*	0.072*	-0.014	-0.064	-0.018	-0.154	0.086	-0.096	-0.032*
		-22.1	0.056*	0.072*	-0.014	-0.064	-0.018	-0.054	0.086	-0.096	0.068*
		-22	-0.044*	-0.028*	-0.014	0.036	-0.018	-0.054	0.086	-0.096	-0.032*
		-21.9	0.056*	0.072*	0.086	0.136	-0.018	-0.054	0.086	-0.096	-0.032*
		-21.8	0.056*	0.072*	0.086	0.136	-0.018	-0.054	0.086	-0.096	-0.132*
		-21.7	0.056*	0.072*	0.186	0.136	-0.018	-0.054	0.086	-0.096	-0.132*
		-21.6	-0.044*	-0.028*	0.186	0.036	-0.118	-0.154	0.086	0.004	-0.132*
		-21.5	-0.044*	0.072*	0.086	0.036	-0.118	-0.154	0.086	0.004	-0.132*
		-21.4	0.056*	0.072*	0.086	0.036	-0.118	-0.254	-0.014	-0.096	-0.132*
		-21.3	0.056*	0.072*	0.086	0.036	-0.018	-0.154	-0.014	-0.096	-0.132*
		-21.2	0.056*	0.072*	-0.014	-0.064	-0.018	-0.154	-0.014	-0.096	-0.132*
		-21.1	0.056*	0.072*	-0.014	-0.064	-0.118	-0.154	-0.014	-0.096	-0.132*
		-21	0.056*	0.072*	-0.014	-0.064	-0.018	-0.154	-0.114	-0.196	-0.032*
		-20.9	0.056*	0.072*	-0.014	0.036	-0.018	-0.154	-0.114	-0.196	-0.032*
		-20.8	0.056*	0.072*	-0.014	0.036	-0.018	-0.054	-0.114	-0.196	0.068*
		-20.7	0.156*	0.172*	0.086	0.036	-0.018	-0.054	-0.114	-0.196	0.068*
		-20.6	0.156*	0.072*	0.086	0.036	-0.018	-0.054	-0.114	-0.196	0.068*
		-20.5	0.156*	0.172*	0.086	0.036	-0.018	-0.054	-0.014	0.004	-0.032*
		-20.4	0.156*	0.172*	0.186	0.036	-0.018	-0.154	-0.114	-0.096	-0.032*
		-20.3	0.056*	0.072*	-0.014	-0.064	-0.018	-0.154	-0.114	-0.096	-0.132*
		-20.2	0.056*	0.072*	-0.014	-0.064	-0.018	-0.154	-0.014	-0.096	-0.132*
		-20.1	0.056*	0.072*	-0.014	-0.064	-0.018	-0.154	-0.014	-0.096	-0.132*
		-20	0.056*	0.072*	-0.014	-0.064	-0.018	-0.154	-0.014	-0.096	-0.032*
		-19.9	0.056*	0.072*	-0.014	-0.064	-0.018	-0.154	-0.014	-0.096	-0.032*
		-19.8	0.056*	0.072*	-0.014	-0.064	-0.018	-0.154	-0.014	-0.096	-0.032*
		-19.7	0.156*	0.072*	-0.014	-0.064	-0.018	-0.154	-0.014	-0.096	-0.032*
		-19.6	0.156*	0.072*	-0.014	0.036	-0.018	-0.154	-0.014	-0.096	-0.032*
		-19.5	0.156*	0.072*	0.086	-0.064	-0.018	-0.154	-0.114	-0.096	-0.032*
		-19.4	0.156*	0.172*	0.086	-0.064	-0.018	-0.154	-0.114	-0.196	-0.032*
		-19.3	0.156*	0.172*	-0.014	-0.164	-0.018	-0.154	-0.114	-0.196	-0.032*
		-19.2	0.156*	0.172*	-0.014	-0.164	-0.018	-0.154	-0.114	-0.196	0.068*
		-19.1	0.156*	0.072*	0.086	-0.064	-0.018	-0.154	-0.114	-0.196	-0.132*
		-19	0.256*	0.172*	0.086	-0.064	-0.018	-0.154	-0.114	-0.196	-0.132*
		-18.9	0.256*	0.172*	0.086	-0.064	-0.018	-0.254	-0.114	-0.196	-0.132*
		-18.8	0.156*	0.172*	-0.014	-0.064	-0.018	-0.254	-0.114	-0.196	-0.132*
		-18.7	0.156*	0.172*	-0.014	-0.064	-0.018	-0.254	-0.114	-0.196	-0.132*
		-18.6	0.156*	0.172*	-0.014	-0.064	-0.018	-0.254	-0.114	-0.196	-0.032*
		-18.5	0.056*	0.072*	-0.114	-0.064	-0.018	-0.254	-0.114	-0.196	-0.032*
		-18.4	0.056*	0.072*	-0.114	-0.064	-0.018	-0.254	-0.114	-0.196	-0.032*
		-18.3	0.056*	0.072*	-0.114	-0.064	-0.018	-0.254	-0.114	-0.196	-0.032*
		-18.2	0.056*	0.072*	-0.214	-0.164	-0.018	-0.254	-0.114	-0.196	0.068*
		-18.1	0.056*	0.072*	-0.214	-0.164	-0.018	-0.254	-0.114	-0.196	-0.032*
		-18	0.056*	0.072*	-0.214	-0.164	-0.018	-0.254	-0.114	-0.196	-0.032*
		-17.9	0.056*	0.072*	-0.114	-0.064	-0.018	-0.254	-0.114	-0.196	-0.032*
		-17.8	0.156*	0.172*	-0.114	-0.064	-0.018	-0.254	-0.114	-0.196	-0.032*
		-17.7	0.156*	0.172*	-0.114	-0.064	-0.018	-0.254	-0.114	-0.196	-0.032*
		-17.6	0.156*	0.172*	-0.114	-0.064	-0.018	-0.254	-0.114	-0.196	-0.032*
		-17.5	0.156*	0.172*	-0.114	-0.064	-0.018	-0.254	-0.114	-0.196	-0.032*
		-17.4	0.156*	0.172*	-0.114	-0.064	-0.018	-0.254	-0.014	-0.096	-0.032*
		-17.3	0.156*	0.172*	-0.114	-0.064	-0.018	-0.254	-0.014	-0.096	-0.032*
		-17.2	0.156*	0.172*	-0.114	-0.064	-0.018	-0.254	-0.014	-0.096	-0.032*
		-17.1	0.156*	0.172*	-0.114	-0.064	-0.018	-0.254	-0.014	-0.096	-0.032*
		-17	0.156*	0.172*	-0.114	-0.064	-0.018	-0.254	-0.014	-0.196	-0.032*
		-16.9	0.156*	0.172*	-0.114	-0.064	-0.018	-0.254	-0.014	-0.196	-0.032*
		-16.8	0.156*	0.072*	-0.114	-0.064	-0.118	-0.254	-0.114	-0.196	-0.032*
		-16.7	0.156*	0.072*	-0.114	-0.064	-0.118	-0.254	-0.114	-0.196	-0.032*
		-16.6	0.156*	0.072*	-0.114	-0.064	-0.018	-0.154	-0.014	-0.096	-0.032*
		-16.5	0.156*	0.072*	-0.014	0.036	-0.018	-0.154	-0.014	-0.096	-0.032*
		-16.4	0.156*	0.072*	-0.014	-0.064	-0.018	-0.154	-0.014	-0.096	0.068*
		-16.3	0.156*	0.072*	-0.114	-0.064	-0.018	-0.154	-0.014	-0.096	-0.032*
		-16.2	0.156*	-0.028*	-0.114	-0.064	-0.018	-0.254	-0.014	-0.096	-0.032*
		-16.1	0.156*	-0.028*	-0.114	-0.064	-0.018	-0.254	-0.014	-0.096	-0.032*
		-16	-0.044*	-0.028*	-0.014	0.036	-0.018	-0.154	-0.014	-0.096	-0.032*
		-15.9	-0.044*	-0.028*	-0.114	-0.064	-0.018	-0.354	-0.014	-0.096	-0.032*
		-15.8	-0.044*	-0.028*	-0.014	0.036	-0.018	-0.254	-0.014	-0.096	-0.032*
		-15.7	0.056*	0.072*	-0.014	0.036	-0.018	-0.354	-0.014	-0.096	-0.032*
		-15.6	0.056*	0.072*	-0.114	0.036	-0.018	-0.354	-0.014	-0.096	-0.132*
		-15.5	0.056*	0.072*	-0.114	0.036	-0.018	-0.354	-0.014	-0.096	-0.032*
		-15.4	0.156*	0.172*	-0.114	0.036	-0.018	-0.254	-0.014	-0.096	-0.032*
		-15.3	0.156*	0.172*	-0.114	0.036	-0.018	-0.354	-0.014	-0.096	-0.032*
		-15.2	0.156*	0.172*	-0.114	0.036	-0.118	-0.254	-0.014	-0.096	-0.032*
		-15.1	0.256*	0.172*	-0.114	0.036	-0.118	-0.254	-0.014	-0.096	-0.032*
		-15	0.156*	0.172*	-0.014	0.036	-0.118	-0.254	-0.014	-0.096	-0.032*
		-14.9	0.156*	0.172*	-0.014	0.036	-0.118	-0.254	-0.014	-0.096	-0.032*
		-14.8	0.156*	0.172*	-0.014	0.036	-0.118	-0.254	-0.014	-0.096	-0.032*
		-14.7	0.156*	0.172*	-0.114	0.036	-0.118	-0.354	-0.014	-0.196	-0.032*
		-14.6	0.156*	0.172*	-0.114	0.036	-0.118	-0.354	-0.014	-0.196	-0.032*
		-14.5	0.156*	0.172*	-0.114	-0.064	-0.118	-0.354	-0.014	-0.196	-0.032*
		-14.4	0.156*	0.172*	-0.114	-0.064	-0.118	-0.354	-0.114	-0.196	-0.032*
		-14.3	0.156*	0.172*	-0.114	-0.064	-0.118	-0.354	-0.114	-0.196	-0.032*
		-14.2	0.156*	0.172*	-0.114	-0.064	-0.118	-0.354	-0.114	-0.196	-0.032*
		-14.1	0.156*	0.172*	-0.114	-0.064	-0.118	-0.354	-0.014	-0.096	-0.032*
		-14	0.056*	0.272*	-0.114	-0.064	-0.018	-0.254	-0.014	-0.096	-0.032*
		-13.9	0.056*	0.172*	-0.014	0.036	-0.018	-0.254	-0.014	-0.096	-0.032*
		-13.8	0.056*	0.172*	-0.014	0.036	-0.018	-0.254	-0.014	-0.096	-0.032*
		-13.7	0.056*	0.072*	-0.014	0.036	-0.118	-0.254	-0.014	-0.096	0.068*
		-13.6	0.056*	0.172*	-0.014	0.036	-0.118	-0.254	-0.014	-0.096	0.068*
		-13.5	0.056*	0.172*	-0.014	0.036	-0.118	-0.254	-0.014	-0.096	0.068*
		-13.4	0.056*	0.172*	-0.014	0.036	-0.118	-0.254	-0.014	-0.096	0.068*
		-13.3	0.056*	0.172*	-0.014	0.036	-0.118	-0.254	-0.014	-0.096	0.068*
		-13.2	0.056*	0.172*	-0.014	0.036	-0.118	-0.254	-0.014	-0.096	0.068*
		-13.1	0.056*	0.172*	-0.014	0.036	-0.118	-0.254	-0.014	-0.096	0.068*
		-13	0.056*	0.172*	-0.014	0.036	-0.118	-0.254	-0.014	-0.096	0.068*
		-12.9	0.056*	0.172*	-0.014	0.036	-0.118	-0.254	-0.014	-0.096	0.068*
		-12.8	0.056*	0.172*	-0.114	-0.064	-0.118	-0.254	-0.114	-0.096	0.068*
		-12.7	0.056*	0.172*	-0.114	-0.164	-0.118	-0.254	-0.114	-0.096	-0.032*
		-12.6	0.056*	0.172*	-0.114	-0.164	-0.118	-0.254	-0.014	0.004	-0.032*
		-12.5	0.156*	0.272*	-0.114	-0.164	-0.118	-0.354	-0.014	0.004	-0.032*
		-12.4	0.056*	0.272*	-0.014	-0.064	-0.018	-0.254	-0.014	0.004	-0.032*
		-12.3	0.056*	0.172*	-0.014	-0.064	-0.018	-0.254	-0.014	0.004	-0.132*
		-12.2	0.056*	0.172*	-0.014	-0.064	-0.018	-0.254	-0.014	0.004	-0.032*
		-12.1	0.056*	0.172*	-0.014	-0.064	0.082	-0.154	-0.014	0.004	-0.132*
		-12	0.056*	0.172*	-0.014	-0.064	-0.018	-0.154	-0.014	-0.096	-0.032*
		-11.9	0.156*	0.172*	-0.014	-0.064	-0.018	-0.154	-0.014	-0.096	-0.032*
		-11.8	0.156*	0.072*	-0.014	-0.064	-0.018	-0.154	-0.014	-0.096	-0.032*
		-11.7	0.156*	0.072*	-0.014	-0.064	-0.018	-0.154	-0.014	-0.096	-0.032*
		-11.6	0.156*	0.072*	-0.114	-0.064	-0.018	-0.154	-0.014	-0.096	-0.032*
		-11.5	0.156*	0.072*	-0.114	-0.064	-0.018	-0.154	-0.014	-0.096	-0.032*
		-11.4	0.156*	0.072*	-0.114	-0.064	-0.018	-0.154	-0.014	-0.096	-0.032*
		-11.3	0.156*	0.072*	-0.114	-0.064	-0.018	-0.054	-0.014	0.004	-0.032*
		-11.2	0.156*	0.072*	-0.114	-0.064	-0.018	-0.054	-0.014	0.004	-0.032*
		-11.1	0.156*	0.072*	-0.114	-0.064	-0.018	-0.054	-0.014	0.004	-0.032*
		-11	0.156*	0.072*	-0.114	-0.064	-0.018	-0.054	-0.014	0.004	-0.032*
		-10.9	0.156*	0.072*	-0.014	0.036	-0.018	-0.054	-0.014	0.004	-0.032*
		-10.8	0.156*	0.072*	-0.014	0.036	-0.018	-0.054	-0.014	0.004	-0.032*
		-10.7	0.156*	0.072*	-0.014	0.036	-0.018	-0.054	-0.014	0.004	-0.032*
		-10.6	0.156*	0.072*	-0.014	-0.064	-0.018	-0.054	-0.014	0.004	-0.032*
		-10.5	0.156*	0.072*	-0.014	-0.064	-0.018	-0.054	-0.014	0.004	-0.032*
		-10.4	0.156*	0.072*	-0.014	-0.064	-0.018	-0.054	-0.014	0.004	-0.032*
		-10.3	0.256*	0.172*	-0.014	-0.064	-0.018	-0.054	-0.014	0.004	-0.032*
		-10.2	0.256*	0.172*	-0.014	-0.064	0.082	0.046	-0.014	0.004	-0.032*
		-10.1	0.156*	0.172*	-0.014	-0.064	0.082	0.046	-0.014	0.004	-0.032*
		-10	0.056*	0.072*	-0.014	-0.064	0.082	0.046	-0.014	0.004	0.068*
		-9.9	0.056*	0.072*	-0.014	-0.064	0.082	0.046	-0.014	0.004	0.068*
		-9.8	0.056*	0.072*	-0.014	-0.064	0.082	0.046	-0.014	-0.096	0.068*
		-9.7	0.056*	0.072*	-0.014	-0.064	0.082	0.046	-0.014	-0.096	0.068*
		-9.6	0.056*	0.072*	-0.014	-0.064	-0.018	0.046	0.086	0.004	0.068*
		-9.5	0.056*	0.072*	-0.014	-0.064	-0.018	0.046	0.086	0.004	0.068*
		-9.4	0.056*	0.072*	-0.014	-0.064	-0.018	0.046	0.086	0.004	0.068*
		-9.3	0.056*	0.072*	-0.014	-0.064	-0.018	0.046	0.086	0.004	0.068*
		-9.2	0.056*	0.072*	-0.014	-0.064	-0.018	0.046	0.086	0.004	0.068*
		-9.1	0.056*	0.072*	-0.014	-0.064	-0.018	0.046	0.086	0.004	-0.032*
		-9	0.056*	0.072*	-0.014	-0.064	-0.018	0.046	0.086	0.004	-0.032*
		-8.9	0.056*	0.072*	-0.014	-0.064	-0.018	0.046	-0.014	0.004	-0.032*
		-8.8	0.056*	0.072*	-0.014	-0.064	-0.018	0.046	-0.014	0.004	-0.032*
		-8.7	0.056*	0.072*	-0.014	-0.064	-0.018	0.046	-0.014	0.004	-0.032*
		-8.6	0.056*	0.072*	-0.014	-0.064	-0.018	0.046	-0.014	0.004	-0.032*
		-8.5	0.056*	0.072*	-0.014	-0.064	-0.018	0.046	-0.014	0.004	-0.032*
		-8.4	0.056*	0.072*	-0.014	-0.064	-0.018	0.046	-0.014	0.004	-0.032*
		-8.3	0.056*	0.072*	-0.014	-0.064	-0.018	0.046	-0.014	0.004	-0.032*
		-8.2	0.056*	0.072*	-0.014	-0.064	-0.018	0.046	-0.014	0.004	-0.032*
		-8.1	0.056*	0.072*	-0.014	-0.064	-0.018	0.046	-0.014	0.004	-0.032*
		-8	0.056*	0.072*	-0.014	-0.064	-0.018	0.046	-0.014	0.004	-0.032*
		-7.9	0.056*	-0.028*	-0.014	-0.064	-0.018	0.046	-0.014	0.004	-0.032*
		-7.8	0.056*	-0.028*	-0.014	-0.064	0.082	0.046	-0.014	0.004	-0.032*
		-7.7	0.056*	-0.028*	-0.014	-0.064	0.082	0.046	-0.014	0.004	-0.032*
		-7.6	-0.044*	-0.128*	0.086	0.036	0.082	0.046	-0.014	0.004	-0.032*
		-7.5	-0.044*	-0.128*	0.086	0.036	0.082	0.046	-0.014	0.004	-0.032*
		-7.4	-0.044*	-0.128*	0.086	0.036	0.082	0.046	-0.014	0.004	-0.032*
		-7.3	-0.044*	-0.128*	0.086	0.036	-0.018	-0.054	-0.014	0.004	-0.032*
		-7.2	-0.044*	-0.128*	0.086	0.036	-0.018	-0.054	-0.014	0.004	-0.032*
		-7.1	-0.044*	-0.128*	0.086	0.036	-0.018	-0.054	-0.014	0.004	-0.032*
		-7	-0.044*	-0.128*	0.086	0.036	-0.018	-0.054	-0.014	0.004	-0.032*
		-6.9	-0.044*	-0.128*	-0.014	0.036	-0.018	-0.054	-0.014	0.004	-0.032*
		-6.8	-0.044*	-0.128*	-0.014	0.036	-0.018	-0.054	-0.014	0.004	-0.032*
		-6.7	-0.044*	-0.128*	-0.014	0.136	-0.018	-0.054	-0.014	0.004	-0.032*
		-6.6	-0.144*	-0.128*	-0.014	0.136	-0.018	-0.054	-0.014	0.004	-0.032*
		-6.5	-0.144*	-0.128*	-0.014	0.136	-0.018	-0.054	-0.014	0.004	0.068*
		-6.4	-0.044*	-0.028*	-0.014	0.136	-0.018	-0.054	-0.014	0.004	0.068*
		-6.3	-0.044*	-0.028*	-0.014	0.136	-0.018	-0.054	-0.014	0.004	0.068*
		-6.2	-0.044*	-0.028*	-0.014	0.136	-0.018	-0.054	-0.014	0.004	0.068*
		-6.1	-0.044*	-0.028*	-0.014	0.036	-0.018	-0.054	-0.014	0.004	-0.032*
		-6	-0.044*	-0.028*	-0.014	0.036	-0.018	-0.054	-0.014	0.004	0.068*
		-5.9	-0.044*	-0.028*	-0.014	0.036	-0.018	-0.054	-0.014	0.004	0.068*
		-5.8	-0.044*	-0.028*	-0.014	0.036	-0.018	-0.054	-0.014	0.004	-0.032*
		-5.7	-0.044*	-0.028*	-0.014	0.036	-0.018	-0.054	-0.014	0.004	-0.032*
		-5.6	-0.044*	-0.028*	-0.014	0.036	-0.018	-0.054	-0.014	0.004	-0.032*
		-5.5	-0.044*	0.072*	-0.014	0.036	-0.018	-0.054	-0.014	0.004	-0.132*
		-5.4	-0.044*	0.072*	-0.014	0.036	-0.018	-0.054	-0.014	0.004	-0.032*
		-5.3	-0.044*	0.072*	-0.014	0.036	-0.018	-0.054	-0.014	0.004	-0.032*
		-5.2	-0.044*	0.072*	-0.014	0.036	-0.018	-0.054	-0.014	0.004	0.068*
		-5.1	-0.044*	0.072*	-0.014	0.036	-0.018	-0.054	-0.014	0.004	0.068*
		-5	-0.044*	0.072*	-0.014	0.036	-0.018	-0.054	-0.014	0.004	-0.032*
		-4.9	-0.044*	0.072*	-0.014	0.036	-0.118	-0.054	-0.014	0.004	-0.032*
		-4.8	-0.044*	0.072*	-0.114	-0.064	-0.018	0.046	-0.014	0.004	-0.032*
		-4.7	-0.044*	0.072*	-0.114	-0.064	-0.018	0.046	-0.014	0.004	-0.032*
		-4.6	-0.044*	0.072*	-0.014	0.036	-0.018	0.046	-0.014	0.004	-0.032*
		-4.5	-0.044*	0.072*	-0.014	0.036	-0.018	0.046	0.086	0.104	-0.032*
		-4.4	-0.044*	-0.028*	-0.014	0.036	-0.018	0.046	-0.014	0.004	-0.032*
		-4.3	-0.044*	-0.028*	-0.014	0.036	-0.018	0.046	-0.014	0.004	-0.032*
		-4.2	-0.044*	-0.028*	-0.014	0.036	-0.018	0.046	-0.114	0.004	-0.032*
		-4.1	-0.044*	-0.028*	-0.014	0.036	-0.018	0.046	-0.114	-0.096	-0.032*
		-4	0.056*	0.072*	-0.014	0.036	-0.018	0.046	-0.114	-0.096	-0.032*
		-3.9	0.056*	0.072*	-0.014	0.036	-0.018	0.046	-0.114	-0.096	-0.032*
		-3.8	0.056*	0.072*	-0.014	0.036	-0.018	0.046	-0.114	-0.096	0.068*
		-3.7	0.056*	0.072*	-0.014	-0.064	-0.018	0.046	-0.114	-0.096	0.068*
		-3.6	0.056*	0.072*	-0.014	-0.064	-0.018	0.046	-0.114	-0.096	0.068*
		-3.5	0.056*	0.072*	-0.014	-0.064	-0.018	-0.054	-0.114	-0.096	0.168*
		-3.4	0.056*	0.072*	-0.014	-0.064	-0.018	-0.054	-0.114	-0.096	0.168*
		-3.3	0.056*	0.072*	-0.014	-0.064	-0.018	-0.054	-0.114	-0.096	0.168*
		-3.2	0.056*	0.072*	-0.014	-0.064	-0.018	-0.054	-0.114	-0.096	0.168*
		-3.1	0.056*	0.072*	0.086	-0.164	-0.018	-0.054	-0.114	-0.096	0.068*
		-3	0.056*	0.072*	-0.014	-0.164	-0.018	-0.054	-0.114	-0.096	0.068*
		-2.9	0.056*	0.072*	-0.014	-0.164	-0.018	-0.054	-0.114	-0.096	0.068*
		-2.8	0.056*	0.072*	0.086	-0.064	-0.018	-0.054	-0.114	-0.096	0.068*
		-2.7	-0.044*	0.072*	0.086	-0.064	-0.018	-0.054	-0.114	-0.096	0.068*
		-2.6	0.056*	0.172*	0.086	-0.064	-0.018	-0.054	-0.014	0.004	0.068*
		-2.5	0.056*	0.172*	0.086	-0.064	-0.018	-0.054	-0.014	0.004	0.068*
		-2.4	0.156*	0.272*	0.086	-0.064	-0.018	-0.054	-0.014	0.004	0.068*
		-2.3	0.156*	0.272*	0.086	-0.064	-0.018	-0.054	-0.014	0.004	0.068*
		-2.2	0.156*	0.272*	0.186	0.036	-0.118	-0.054	-0.014	0.004	0.068*
		-2.1	0.156*	0.272*	0.186	0.036	-0.018	0.046	-0.014	0.004	0.068*
		-2	0.156*	0.272*	0.286	0.136	-0.018	0.046	-0.014	-0.096	0.068*
		-1.9	0.156*	0.272*	0.286	0.136	-0.018	0.046	-0.014	-0.096	-0.032*
		-1.8	0.156*	0.272*	0.186	0.036	-0.018	0.046	-0.014	-0.096	-0.032*
		-1.7	0.056*	0.172*	0.186	0.036	-0.018	0.046	-0.014	-0.096	-0.032*
		-1.6	0.056*	0.172*	0.186	0.036	-0.018	0.046	-0.014	-0.096	0.068*
		-1.5	-0.044*	0.072*	0.186	0.036	-0.018	0.046	0.086	-0.096	0.068*
		-1.4	0.056*	0.072*	0.186	0.036	-0.218	0.046	0.086	0.004	0.068*
		-1.3	0.056*	0.172*	0.186	-0.064	-0.218	-0.054	0.086	-0.096	0.068*
		-1.2	-0.144*	-0.028*	0.086	-0.164	-0.218	-0.054	0.086	0.004	0.068*
		-1.1	-0.244*	-0.028*	0.086	-0.164	-0.018	0.046	0.086	0.004	0.168*
		-1	-0.144*	-0.028*	-0.014	-0.164	-0.018	0.046	0.086	0.004	0.168*
		-0.9	-0.244*	0.072*	-0.014	-0.364	0.182	0.046	-0.014	0.004	0.268*
		-0.8	-2.344*	-2.028*	-2.014	-2.064	-1.518	-1.854	-1.814	-2.196	-1.932*
		-0.7	-0.944*	-1.328*	-1.114	-0.764	-0.818	-1.754	-0.614	-0.796	-1.632*
		-0.6	-0.544*	-0.428*	-0.514	-0.664	-0.418	-0.654	-0.414	-0.496	-0.532*
		-0.5	-0.144*	-0.228*	-0.214	-0.364	-0.118	-0.454	-0.014	-0.096	-0.332*
		-0.4	-0.244*	0.072*	-0.014	0.136	-0.118	-0.254	0.186	0.204	-0.032*
		-0.3	0.256*	0.472*	0.186	0.036	-0.218	-0.054	-0.114	-0.196	0.068*
		-0.2	0.756*	1.072*	0.886	0.536	0.482	0.446	-0.114	0.104	0.668*
		-0.1	1.556*	1.672*	1.486	1.336	1.182	1.446	-0.014	0.104	1.268*
		0	2.956*	2.672*	2.786	3.136	3.482	3.046	4.886	8.904	2.368*
		0.1	4.156*	4.572*	4.386	3.636	3.682	5.646	2.186	3.304	4.068*
		0.2	3.956*	4.572*	3.886	3.536	3.482	3.846	-0.614	-2.396	4.468*
		0.3	3.456*	3.872*	3.586	2.836	2.782	2.746	-1.714	-3.596	3.768*
		0.4	2.656*	2.572*	2.786	2.536	2.182	1.946	-1.514	-3.396	3.068*
		0.5	2.156*	2.172*	1.786	1.736	1.582	1.646	-0.714	-2.296	2.268*
		0.6	1.756*	1.872*	1.486	1.436	1.482	1.146	-0.514	-1.096	1.968*
		0.7	1.656*	1.272*	1.286	1.236	1.182	1.246	0.186	0.104	1.868*
		0.8	1.356*	1.672*	1.286	0.936	1.382	1.046	0.686	0.904	1.168*
		0.9	1.156*	1.472*	1.186	0.836	1.082	1.146	0.886	1.504	1.068*
		1	1.256*	1.172*	1.386	1.236	1.482	1.746	1.086	2.104	1.268*
		1.1	1.256*	1.272*	1.186	1.236	1.382	1.746	1.486	2.804	1.268*
		1.2	1.056*	1.272*	0.986	1.036	1.382	2.046	2.086	3.504	0.768*
		1.3	1.156*	1.172*	0.986	0.936	1.482	2.146	2.186	3.604	0.668*
		1.4	1.256*	1.172*	0.986	0.936	1.482	1.846	2.486	4.104	0.668*
		1.5	1.056*	0.972*	0.986	0.936	1.382	1.846	2.786	4.504	0.868*
		1.6	0.956*	1.072*	0.886	0.936	1.582	2.146	2.786	4.804	0.868*
		1.7	0.756*	1.172*	0.786	0.736	1.582	2.146	2.886	4.904	0.768*
		1.8	0.956*	1.072*	0.686	0.836	1.582	2.346	3.086	5.104	0.568*
		1.9	0.856*	0.872*	0.686	0.936	1.582	2.446	3.186	5.304	0.668*
		2	0.756*	0.872*	0.586	0.936	1.582	2.446	3.486	5.604	0.768*
		2.1	0.856*	0.872*	0.486	0.936	1.582	2.546	3.586	5.704	0.668*
		2.2	0.656*	0.772*	0.486	1.036	1.682	2.546	3.786	6.004	0.768*
		2.3	0.756*	0.772*	0.586	0.836	1.782	2.646	3.886	6.204	0.668*
		2.4	0.556*	0.872*	0.486	0.836	1.682	2.546	3.886	6.304	0.568*
		2.5	0.656*	0.872*	0.786	0.936	1.782	2.646	4.186	6.504	0.568*
		2.6	0.656*	0.872*	0.786	0.936	1.882	2.646	4.286	6.604	0.668*
		2.7	0.556*	0.672*	0.786	1.036	1.882	2.746	4.386	6.804	0.568*
		2.8	0.656*	0.872*	0.686	0.936	1.982	2.846	4.386	6.804	0.568*
		2.9	0.656*	0.772*	0.786	1.036	1.882	2.746	4.586	7.004	0.568*
		3	0.556*	0.672*	0.686	1.036	1.982	2.946	4.586	7.004	0.368*
		3.1	0.556*	0.672*	0.686	1.036	2.182	3.046	4.686	7.204	0.368*
		3.2	0.556*	0.672*	0.786	1.036	1.982	3.046	4.786	7.404	0.568*
		3.3	0.556*	0.672*	0.686	1.036	1.982	3.146	4.886	7.504	0.468*
		3.4	0.556*	0.572*	0.686	1.036	1.982	3.146	5.086	7.604	0.468*
		3.5	0.456*	0.672*	0.686	1.136	1.882	3.246	5.086	7.704	0.368*
		3.6	0.456*	0.672*	0.686	1.036	1.982	3.346	5.286	7.904	0.368*
		3.7	0.356*	0.572*	0.786	1.036	2.082	3.346	5.286	7.904	0.368*
		3.8	0.356*	0.572*	0.786	1.036	2.082	3.446	5.386	7.904	0.468*
		3.9	0.356*	0.672*	0.686	1.036	2.082	3.446	5.486	7.904	0.468*
		4	0.356*	0.572*	0.886	1.236	2.182	3.546	5.586	8.104	0.468*
		4.1	0.256*	0.472*	0.886	1.236	2.082	3.546	5.586	8.104	0.468*
		4.2	0.356*	0.672*	0.886	1.336	2.082	3.646	5.786	8.304	0.368*
		4.3	0.356*	0.572*	0.886	1.436	2.182	3.746	5.686	8.204	0.468*
		4.4	0.356*	0.572*	0.886	1.436	2.282	3.746	5.786	8.304	0.368*
		4.5	0.256*	0.572*	0.886	1.536	2.182	3.746	5.986	8.304	0.368*
		4.6	0.256*	0.572*	0.986	1.636	2.282	3.846	5.986	8.404	0.468*
		4.7	0.256*	0.572*	0.986	1.636	2.282	3.946	6.186	8.604	0.468*
		4.8	0.356*	0.472*	0.886	1.536	2.382	3.946	6.286	8.704	0.468*
		4.9	0.356*	0.572*	0.886	1.536	2.382	4.046	6.386	8.704	0.468*
		5	0.356*	0.472*	0.886	1.436	2.382	4.046	6.386	8.704	0.468*
		5.1	0.356*	0.572*	0.786	1.536	2.382	4.146	6.486	8.704	0.468*
		5.2	0.456*	0.572*	0.786	1.536	2.382	4.046	6.486	8.904	0.368*
		5.3	0.556*	0.572*	0.886	1.436	2.482	4.246	6.486	8.804	0.468*
		5.4	0.556*	0.572*	0.986	1.636	2.482	4.246	6.486	8.804	0.468*
		5.5	0.456*	0.572*	0.886	1.536	2.482	4.146	6.686	8.904	0.468*
		5.6	0.356*	0.572*	0.786	1.436	2.582	4.246	6.786	9.104	0.468*
		5.7	0.356*	0.572*	0.886	1.536	2.582	4.246	6.786	9.104	0.468*
		5.8	0.356*	0.672*	0.986	1.636	2.582	4.346	6.886	9.004	0.468*
		5.9	0.356*	0.672*	0.886	1.536	2.582	4.346	6.886	9.204	0.568*
		6	0.456*	0.572*	0.986	1.636	2.682	4.446	6.786	9.104	0.568*
		6.1	0.556*	0.772*	0.886	1.536	2.582	4.346	6.886	9.104	0.568*
		6.2	0.356*	0.672*	0.886	1.636	2.582	4.446	6.986	9.204	0.568*
		6.3	0.456*	0.672*	0.886	1.636	2.782	4.546	6.986	9.204	0.468*
		6.4	0.356*	0.672*	0.886	1.636	2.682	4.546	6.986	9.104	0.568*
		6.5	0.356*	0.772*	0.886	1.536	2.682	4.546	6.986	9.204	0.668*
		6.6	0.356*	0.672*	0.886	1.636	2.782	4.646	7.186	9.304	0.468*
		6.7	0.356*	0.672*	0.986	1.736	2.782	4.546	7.186	9.304	0.568*
		6.8	0.356*	0.772*	0.886	1.736	2.782	4.746	7.286	9.404	0.568*
		6.9	0.456*	0.772*	0.886	1.636	2.782	4.646	7.286	9.404	0.468*
		7	0.256*	0.672*	0.886	1.736	2.782	4.646	7.186	9.304	0.568*
		7.1	0.356*	0.672*	0.986	1.636	2.882	4.846	7.386	9.504	0.468*
		7.2	0.356*	0.772*	0.986	1.536	2.882	4.746	7.286	9.304	0.468*
		7.3	0.356*	0.772*	0.986	1.736	2.882	4.846	7.386	9.504	0.568*
		7.4	0.356*	0.672*	0.986	1.636	2.982	4.746	7.386	9.504	0.468*
		7.5	0.456*	0.772*	0.986	1.736	2.982	4.746	7.486	9.604	0.668*
		7.6	0.356*	0.772*	1.186	1.936	2.982	4.746	7.486	9.604	0.568*
		7.7	0.456*	0.772*	1.086	1.836	2.982	4.846	7.586	9.604	0.568*
		7.8	0.356*	0.772*	0.986	1.736	2.982	4.846	7.586	9.604	0.368*
		7.9	0.556*	0.972*	1.086	1.936	3.182	5.046	7.686	9.704	0.568*
		8	0.456*	0.772*	0.986	1.936	3.082	4.946	7.686	9.704	0.468*
		8.1	0.556*	0.972*	0.986	1.836	3.182	5.046	7.786	9.704	0.468*
		8.2	0.456*	0.772*	0.986	1.836	3.282	4.946	7.686	9.604	0.668*
		8.3	0.356*	0.872*	0.986	1.936	3.182	5.046	7.786	9.804	0.468*
		8.4	0.456*	0.972*	1.086	1.936	3.282	5.046	7.786	9.704	0.468*
		8.5	0.456*	0.872*	0.986	2.036	3.282	5.146	7.986	9.804	0.368*
		8.6	0.356*	0.872*	1.086	1.936	3.482	5.246	7.886	9.704	0.568*
		8.7	0.456*	0.872*	0.886	1.836	3.282	5.246	7.786	9.704	0.568*
		8.8	0.256*	0.772*	1.086	2.036	3.382	5.346	7.986	9.904	0.468*
		8.9	0.356*	0.872*	1.086	1.936	3.382	5.346	7.886	9.704	0.368*
		9	0.456*	0.872*	1.086	1.936	3.482	5.446	8.086	9.804	0.568*
		9.1	0.456*	0.972*	1.186	2.036	3.482	5.346	7.886	9.704	0.368*
		9.2	0.456*	0.872*	1.186	1.936	3.482	5.446	7.986	9.804	0.568*
		9.3	0.256*	0.772*	1.186	2.036	3.482	5.446	8.086	9.804	0.568*
		9.4	0.456*	0.872*	1.286	2.036	3.582	5.546	8.086	9.904	0.468*
		9.5	0.356*	0.772*	1.186	2.136	3.582	5.546	7.986	9.804	0.668*
		9.6	0.356*	0.672*	1.286	2.136	3.382	5.346	8.086	9.904	0.468*
		9.7	0.356*	0.772*	1.386	2.136	3.582	5.546	8.086	9.904	0.568*
		9.8	0.356*	0.772*	1.486	2.136	3.582	5.546	8.086	9.904	0.568*
		9.9	0.356*	0.672*	1.386	2.236	3.582	5.446	8.086	9.904	0.568*
		10	0.356*	0.672*	1.386	2.136	3.682	5.546	8.186	9.904	0.568*
		10.1	0.256*	0.672*	1.386	1.936	3.482	5.546	8.086	9.904	0.568*
		10.2	0.356*	0.672*	1.386	2.136	3.682	5.546	8.086	9.904	0.568*
		10.3	0.356*	0.672*	1.386	2.036	3.582	5.546	8.186	10.004	0.568*
		10.4	0.356*	0.872*	1.286	2.136	3.582	5.546	8.186	9.904	0.568*
		10.5	0.356*	0.772*	1.386	2.136	3.682	5.646	7.986	9.904	0.568*
		10.6	0.456*	0.772*	1.286	2.136	3.682	5.646	8.186	9.904	0.568*
		10.7	0.356*	0.872*	1.386	2.036	3.582	5.546	8.086	9.904	0.568*
		10.8	0.356*	0.772*	1.186	2.136	3.782	5.646	8.186	10.004	0.468*
		10.9	0.356*	0.772*	1.386	2.136	3.782	5.546	8.286	9.904	0.568*
		11	0.456*	0.772*	1.286	2.136	3.782	5.746	8.186	9.904	0.568*
		11.1	0.356*	0.772*	1.286	2.236	3.882	5.746	8.386	10.004	0.468*
		11.2	0.456*	0.872*	1.286	2.336	3.782	5.746	8.286	10.004	0.468*
		11.3	0.456*	0.772*	1.286	2.236	3.882	5.846	8.286	10.004	0.468*
		11.4	0.456*	0.872*	1.186	2.136	3.882	5.846	8.186	10.004	0.468*
		11.5	0.456*	0.772*	1.386	2.336	3.882	5.846	8.286	10.004	0.568*
		11.6	0.556*	0.772*	1.386	2.336	3.982	5.946	8.386	10.104	0.368*
		11.7	0.456*	0.872*	1.286	2.236	3.782	5.746	8.386	10.104	0.568*
		11.8	0.456*	0.772*	1.386	2.336	3.882	5.746	8.386	10.004	0.468*
		11.9	0.456*	0.972*	1.386	2.236	3.782	5.746	8.386	10.104	0.468*
		12	0.456*	0.872*	1.386	2.236	3.882	5.746	8.286	10.104	0.468*
		12.1	0.456*	0.872*	1.286	2.336	3.982	5.946	8.286	10.004	0.468*
		12.2	0.356*	0.872*	1.486	2.336	3.982	5.846	8.286	10.004	0.368*
		12.3	0.456*	0.972*	1.386	2.336	3.882	5.746	8.286	9.904	0.568*
		12.4	0.356*	0.872*	1.386	2.336	3.982	5.846	8.386	10.004	0.468*
		12.5	0.456*	0.872*	1.286	2.236	4.082	5.946	8.386	10.104	0.468*
		12.6	0.356*	0.872*	1.286	2.336	3.982	5.846	8.386	9.904	0.368*
		12.7	0.456*	0.972*	1.386	2.336	3.982	5.946	8.286	9.904	0.568*
		12.8	0.356*	0.872*	1.286	2.336	3.982	5.946	8.386	10.004	0.568*
		12.9	0.456*	0.972*	1.286	2.336	3.982	6.046	8.386	9.904	0.468*
		13	0.556*	0.972*	1.386	2.436	4.082	5.946	8.386	10.004	0.368*
		13.1	0.456*	1.072*	1.386	2.436	4.182	6.046	8.486	10.004	0.468*
		13.2	0.456*	1.072*	1.286	2.336	4.082	6.046	8.486	10.004	0.468*
		13.3	0.456*	0.872*	1.286	2.336	4.082	5.946	8.386	10.104	0.468*
		13.4	0.456*	0.972*	1.286	2.436	4.082	6.046	8.386	10.104	0.468*
		13.5	0.456*	0.972*	1.286	2.336	4.182	6.046	8.486	10.004	0.468*
		13.6	0.556*	0.972*	1.386	2.436	4.182	6.146	8.386	9.904	0.468*
		13.7	0.356*	0.972*	1.286	2.436	4.082	6.046	8.386	10.004	0.468*
		13.8	0.356*	0.972*	1.386	2.436	4.082	6.046	8.386	10.004	0.568*
		13.9	0.356*	0.872*	1.386	2.436	4.082	6.046	8.386	9.904	0.368*
		14	0.356*	0.872*	1.286	2.436	4.182	6.046	8.386	10.004	0.368*
		14.1	0.456*	1.072*	1.286	2.536	4.182	6.046	8.486	10.004	0.368*
		14.2	0.556*	1.072*	1.286	2.336	4.082	6.146	8.486	10.004	0.368*
		14.3	0.456*	1.072*	1.286	2.436	4.282	6.246	8.386	9.904	0.468*
		14.4	0.456*	1.072*	1.286	2.436	4.282	6.346	8.386	10.004	0.468*
		14.5	0.456*	1.172*	1.286	2.436	4.282	6.246	8.486	9.904	0.468*
		14.6	0.356*	1.072*	1.386	2.436	4.282	6.246	8.486	9.904	0.368*
		14.7	0.456*	0.972*	1.386	2.536	4.182	6.246	8.486	10.004	0.368*
		14.8	0.456*	0.972*	1.386	2.436	4.282	6.246	8.586	10.104	0.368*
		14.9	0.456*	0.972*	1.186	2.336	4.282	6.246	8.486	10.004	0.368*
		15	0.456*	1.072*	1.286	2.436	4.282	6.346	8.486	10.004	0.368*
		15.1	0.456*	1.072*	1.286	2.436	4.282	6.246	8.486	10.004	0.368*
		15.2	0.356*	0.972*	1.286	2.436	4.282	6.246	8.586	10.104	0.568*
		15.3	0.356*	0.972*	1.386	2.436	4.182	6.246	8.586	10.104	0.568*
		15.4	0.356*	0.972*	1.386	2.536	4.182	6.246	8.586	10.004	0.568*
		15.5	0.356*	1.072*	1.286	2.536	4.282	6.246	8.486	10.004	0.468*
		15.6	0.356*	1.072*	1.186	2.436	4.282	6.346	8.486	10.004	0.468*
		15.7	0.456*	0.972*	1.186	2.436	4.182	6.246	8.486	10.004	0.468*
		15.8	0.456*	0.972*	1.286	2.436	4.182	6.246	8.486	10.004	0.468*
		15.9	0.356*	0.872*	1.286	2.436	4.182	6.346	8.586	10.004	0.468*
		16	0.356*	0.872*	1.486	2.636	4.182	6.346	8.586	10.104	0.468*
		16.1	0.456*	0.972*	1.486	2.536	4.282	6.346	8.486	10.004	0.468*
		16.2	0.356*	0.972*	1.486	2.636	4.282	6.246	8.386	9.904	0.468*
		16.3	0.356*	0.972*	1.586	2.636	4.282	6.346	8.386	9.904	0.468*
		16.4	0.356*	0.972*	1.486	2.536	4.382	6.346	8.386	9.904	0.468*
		16.5	0.356*	1.072*	1.486	2.536	4.182	6.246	8.486	10.004	0.468*
		16.6	0.356*	0.972*	1.486	2.536	4.182	6.246	8.486	10.004	0.468*
		16.7	0.456*	1.072*	1.486	2.636	4.282	6.346	8.586	10.104	0.568*
		16.8	0.456*	0.972*	1.486	2.636	4.282	6.346	8.686	10.204	0.568*
		16.9	0.456*	1.072*	1.586	2.536	4.382	6.446	8.586	10.104	0.468*
		17	0.556*	1.072*	1.586	2.636	4.282	6.246	8.586	10.104	0.368*
		17.1	0.556*	1.072*	1.486	2.536	4.282	6.346	8.586	10.104	0.468*
		17.2	0.356*	0.972*	1.486	2.636	4.382	6.346	8.586	10.204	0.468*
		17.3	0.356*	1.072*	1.586	2.536	4.382	6.446	8.486	10.104	0.468*
		17.4	0.456*	1.072*	1.586	2.636	4.282	6.446	8.486	10.004	0.368*
		17.5	0.456*	1.072*	1.486	2.636	4.382	6.446	8.486	10.004	0.468*
		17.6	0.456*	1.072*	1.586	2.636	4.382	6.546	8.486	10.004	0.468*
		17.7	0.356*	1.072*	1.586	2.736	4.382	6.546	8.586	10.004	0.468*
		17.8	0.356*	0.972*	1.486	2.536	4.382	6.546	8.586	10.104	0.468*
		17.9	0.456*	0.972*	1.486	2.636	4.482	6.646	8.486	10.004	0.668*
		18	0.456*	1.072*	1.586	2.636	4.482	6.546	8.386	10.004	0.568*
		18.1	0.356*	0.972*	1.586	2.636	4.382	6.546	8.486	10.004	0.568*
		18.2	0.356*	0.972*	1.586	2.736	4.482	6.546	8.486	10.004	0.568*
		18.3	0.456*	1.072*	1.486	2.536	4.482	6.546	8.486	10.004	0.568*
		18.4	0.456*	1.072*	1.586	2.636	4.382	6.546	8.486	10.004	0.468*
		18.5	0.456*	1.072*	1.586	2.636	4.382	6.546	8.486	9.904	0.468*
		18.6	0.256*	1.072*	1.586	2.636	4.482	6.646	8.486	10.004	0.468*
		18.7	0.256*	1.072*	1.686	2.736	4.382	6.546	8.486	10.004	0.368*
		18.8	0.356*	1.072*	1.586	2.536	4.382	6.546	8.486	10.004	0.468*
		18.9	0.356*	1.072*	1.586	2.536	4.382	6.646	8.586	10.004	0.468*
		19	0.256*	1.072*	1.586	2.636	4.482	6.646	8.486	10.004	0.468*
		19.1	0.256*	0.972*	1.586	2.636	4.482	6.646	8.486	10.004	0.468*
		19.2	0.356*	0.972*	1.586	2.736	4.482	6.646	8.486	9.904	0.468*
		19.3	0.356*	0.972*	1.586	2.736	4.582	6.746	8.486	9.904	0.468*
		19.4	0.356*	0.972*	1.486	2.536	4.482	6.646	8.486	10.004	0.568*
		19.5	0.356*	1.072*	1.586	2.636	4.482	6.546	8.486	10.004	0.468*
		19.6	0.256*	0.972*	1.586	2.636	4.582	6.546	8.486	10.004	0.468*
		19.7	0.256*	0.972*	1.586	2.736	4.482	6.546	8.486	10.004	0.468*
		19.8	0.256*	1.072*	1.586	2.736	4.382	6.546	8.486	9.904	0.468*
		19.9	0.256*	1.072*	1.586	2.736	4.482	6.546	8.486	10.004	0.368*
		20	0.356*	1.072*	1.586	2.636	4.482	6.546	8.486	10.004	0.368*
		20.1	0.256*	0.972*	1.586	2.636	4.482	6.646	8.586	10.004	0.368*
		20.2	0.256*	0.972*	1.586	2.736	4.482	6.646	8.486	9.904	0.368*
		20.3	0.256*	1.072*	1.686	2.736	4.582	6.646	8.486	9.904	0.468*
		20.4	0.356*	1.072*	1.686	2.836	4.482	6.546	8.486	10.004	0.468*
		20.5	0.356*	1.072*	1.586	2.736	4.482	6.546	8.486	10.004	0.468*
		20.6	0.256*	0.972*	1.686	2.636	4.582	6.646	8.586	10.004	0.368*
		20.7	0.256*	1.072*	1.686	2.736	4.582	6.546	8.586	9.904	0.468*
		20.8	0.356*	0.972*	1.686	2.736	4.582	6.546	8.586	10.004	0.468*
		20.9	0.356*	0.972*	1.586	2.636	4.482	6.546	8.486	9.904	0.468*
		21	0.356*	0.972*	1.486	2.736	4.482	6.546	8.586	10.004	0.468*
		21.1	0.356*	0.972*	1.586	2.736	4.482	6.546	8.586	10.004	0.468*
		21.2	0.356*	0.872*	1.586	2.736	4.482	6.546	8.586	10.004	0.468*
		21.3	0.256*	0.972*	1.586	2.736	4.582	6.646	8.586	10.104	0.468*
		21.4	0.256*	0.972*	1.586	2.736	4.582	6.646	8.486	10.004	0.468*
		21.5	0.256*	0.972*	1.586	2.736	4.482	6.546	8.586	10.004	0.568*
		21.6	0.356*	0.972*	1.586	2.736	4.582	6.546	8.586	10.004	0.668*
		21.7	0.256*	0.872*	1.586	2.736	4.582	6.646	8.586	10.004	0.568*
		21.8	0.256*	0.972*	1.586	2.836	4.582	6.646	8.586	10.104	0.468*
		21.9	0.256*	0.972*	1.586	2.836	4.582	6.646	8.686	10.104	0.468*
		22	0.256*	0.972*	1.686	2.836	4.682	6.646	8.586	9.904	0.468*
		22.1	0.356*	0.972*	1.686	2.836	4.582	6.646	8.586	9.904	0.468*
		22.2	0.256*	0.972*	1.586	2.736	4.582	6.646	8.686	9.904	0.568*
		22.3	0.256*	0.972*	1.686	2.836	4.582	6.646	8.686	10.004	0.468*
		22.4	0.256*	0.972*	1.686	2.836	4.582	6.646	8.686	10.004	0.468*
		22.5	0.356*	0.972*	1.686	2.936	4.582	6.646	8.586	9.904	0.468*
		22.6	0.356*	0.972*	1.686	2.936	4.482	6.546	8.586	9.904	0.568*
		22.7	0.356*	1.072*	1.786	2.836	4.482	6.546	8.586	9.904	0.568*
		22.8	0.256*	0.972*	1.586	2.736	4.582	6.546	8.486	9.904	0.468*
		22.9	0.256*	0.872*	1.586	2.836	4.582	6.546	8.486	9.904	0.468*
		23	0.256*	0.872*	1.586	2.836	4.582	6.646	8.586	9.904	0.468*
		23.1	0.356*	0.872*	1.686	2.836	4.582	6.646	8.586	9.904	0.568*
		23.2	0.356*	0.972*	1.686	2.936	4.582	6.546	8.586	9.904	0.568*
		23.3	0.256*	0.872*	1.686	2.936	4.582	6.546	8.486	9.904	0.468*
		23.4	0.156*	0.872*	1.686	2.836	4.582	6.646	8.586	9.904	0.468*
		23.5	0.156*	0.872*	1.686	2.836	4.682	6.646	8.586	9.904	0.468*
		23.6	0.256*	0.872*	1.686	2.836	4.682	6.646	8.586	10.004	0.468*
		23.7	0.256*	0.972*	1.686	2.836	4.682	6.646	8.586	10.004	0.468*
		23.8	0.256*	0.972*	1.686	2.936	4.682	6.746	8.586	10.004	0.468*
		23.9	0.256*	0.972*	1.686	2.936	4.682	6.646	8.586	9.904	0.468*
		24	0.156*	0.872*	1.786	2.936	4.782	6.746	8.586	9.904	0.468*
		24.1	0.156*	0.872*	1.686	2.936	4.782	6.746	8.586	10.004	0.368*
		24.2	0.256*	0.872*	1.686	2.836	4.782	6.746	8.686	9.904	0.368*
		24.3	0.256*	0.972*	1.686	2.836	4.682	6.646	8.786	10.004	0.368*
		24.4	0.256*	0.972*	1.786	2.836	4.682	6.646	8.786	10.004	0.368*
		24.5	0.256*	0.972*	1.786	2.936	4.682	6.646	8.686	9.904	0.468*
		24.6	0.156*	0.872*	1.786	2.936	4.682	6.746	8.686	9.904	0.468*
		24.7	0.156*	0.872*	1.786	2.936	4.682	6.746	8.686	10.004	0.368*
		24.8	0.256*	0.872*	1.686	2.936	4.782	6.746	8.686	10.004	0.368*
		24.9	0.256*	0.972*	1.686	2.936	4.682	6.646	8.686	10.004	0.468*
		25	0.356*	1.072*	1.686	2.836	4.682	6.746	8.686	10.004	0.468*
		25.1	0.356*	0.972*	1.686	2.836	4.682	6.746	8.586	10.004	0.468*
		25.2	0.356*	0.972*	1.686	2.936	4.682	6.746	8.586	10.004	0.468*
		25.3	0.356*	0.872*	1.686	2.936	4.782	6.746	8.686	10.004	0.568*
		25.4	0.256*	0.972*	1.686	2.836	4.682	6.746	8.686	10.004	0.468*
		25.5	0.256*	0.972*	1.686	2.936	4.682	6.746	8.686	10.004	0.468*
		25.6	0.256*	0.972*	1.686	2.936	4.682	6.746	8.686	10.004	0.468*
		25.7	0.256*	0.972*	1.686	2.836	4.782	6.746	8.586	10.004	0.568*
		25.8	0.156*	0.872*	1.686	2.936	4.782	6.846	8.686	10.004	0.568*
		25.9	0.356*	1.072*	1.786	2.936	4.682	6.746	8.686	10.004	0.568*
		26	0.256*	0.972*	1.686	2.836	4.682	6.746	8.686	10.004	0.568*
		26.1	0.256*	0.972*	1.686	2.836	4.782	6.746	8.686	10.104	0.668*
		26.2	0.256*	0.972*	1.686	2.936	4.782	6.846	8.686	10.104	0.668*
		26.3	0.256*	0.972*	1.686	2.936	4.782	6.846	8.686	10.104	0.668*
		26.4	0.356*	0.972*	1.786	2.936	4.682	6.746	8.786	10.104	0.568*
		26.5	0.356*	0.972*	1.786	3.036	4.682	6.746	8.786	10.104	0.568*
		26.6	0.256*	0.972*	1.786	2.936	4.682	6.746	8.786	10.104	0.668*
		26.7	0.256*	0.972*	1.686	2.836	4.782	6.746	8.686	10.004	0.668*
		26.8	0.256*	0.972*	1.686	2.836	4.782	6.746	8.686	10.004	0.668*
		26.9	0.256*	0.972*	1.786	2.936	4.782	6.746	8.786	10.104	0.668*
		27	0.256*	0.972*	1.786	2.936	4.782	6.746	8.786	10.104	0.668*
		27.1	0.356*	0.972*	1.786	2.936	4.682	6.646	8.786	10.104	0.668*
		27.2	0.356*	0.972*	1.786	2.936	4.782	6.746	8.786	10.104	0.668*
		27.3	0.356*	0.872*	1.886	3.036	4.782	6.746	8.786	10.104	0.768*
		27.4	0.356*	0.972*	1.786	2.836	4.782	6.746	8.886	10.104	0.668*
		27.5	0.256*	0.872*	1.786	2.836	4.782	6.746	8.886	10.104	0.668*
		27.6	0.256*	0.872*	1.786	2.836	4.882	6.746	8.786	10.004	0.668*
		27.7	0.356*	0.872*	1.786	2.836	4.682	6.646	8.786	10.104	0.768*
		27.8	0.356*	0.972*	1.686	2.736	4.682	6.646	8.686	10.004	0.768*
		27.9	0.356*	0.972*	1.786	2.836	4.682	6.646	8.686	10.004	0.768*
		28	0.256*	0.872*	1.686	2.736	4.682	6.746	8.586	9.904	0.768*
		28.1	0.356*	0.972*	1.586	2.636	4.782	6.846	8.686	10.004	0.668*
		28.2	0.356*	0.972*	1.586	2.736	4.782	6.746	8.686	10.104	0.668*
		28.3	0.356*	0.972*	1.586	2.736	4.782	6.746	8.686	10.104	0.768*
		28.4	0.356*	0.972*	1.586	2.736	4.782	6.746	8.686	10.104	0.768*
		28.5	0.256*	0.972*	1.686	2.736	4.782	6.746	8.586	9.904	0.668*
		28.6	0.256*	0.972*	1.486	2.736	4.682	6.746	8.586	10.104	0.568*
		28.7	0.256*	0.872*	1.486	2.736	4.682	6.746	8.686	10.104	0.568*
		28.8	0.256*	0.872*	1.486	2.636	4.682	6.646	8.586	9.904	0.568*
		28.9	0.256*	0.872*	1.686	2.836	4.682	6.646	8.586	9.904	0.668*
		29	0.256*	0.872*	1.686	2.836	4.682	6.646	8.586	9.904	0.668*
		29.1	0.256*	0.872*	1.686	2.836	4.582	6.546	8.486	9.804	0.668*
		29.2	0.356*	0.872*	1.686	2.836	4.682	6.646	8.586	9.804	0.668*
		29.3	0.356*	0.872*	1.686	2.836	4.682	6.746	8.486	9.604	0.668*
		29.4	-0.044*	0.472*	1.386	2.736	4.282	6.346	8.486	9.704	0.568*
		29.5	-0.544*	-0.028*	0.986	2.536	3.982	6.046	8.286	9.604	-0.032*
		29.6	-0.644*	0.072*	0.686	2.136	3.882	5.746	8.286	9.404	-0.132*
		29.7	-1.844*	-1.228*	-0.414	0.836	2.982	4.846	6.886	8.304	-1.232*
		29.8	0.356*	1.572*	1.886	2.936	4.882	6.246	9.086	10.404	-0.032*
		29.9	0.856*	1.872*	2.286	3.136	4.982	8.146	8.086	6.604	1.068*
		30	-5.044*	-2.228*	-4.214	-6.064	-5.018	2.646	-10.614	-25.596	-3.932*
		30.1	-6.344*	-6.428*	-5.814	-4.764	-3.618	-9.454	2.986	2.704	-7.132*
		30.2	-3.644*	-4.028*	-3.114	-1.364	0.582	0.646	9.286	12.004	-4.432*
		30.3	-2.244*	-1.828*	-0.714	0.436	2.282	4.246	9.486	11.804	-2.532*
		30.4	-1.444*	-1.028*	0.286	1.236	3.282	5.346	8.986	11.004	-1.732*
		30.5	-0.844*	-0.028*	0.286	1.636	3.482	5.546	8.886	10.404	-0.932*
		30.6	-0.444*	0.372*	0.586	1.836	3.682	5.846	8.686	10.004	-0.632*
		30.7	-0.544*	0.072*	0.986	2.336	3.582	5.846	8.586	9.604	-0.232*
		30.8	-0.544*	0.272*	0.886	2.336	3.882	6.046	8.286	9.404	0.068*
		30.9	-0.244*	0.572*	1.186	2.536	3.982	5.946	8.286	9.704	-0.132*
		31	-0.144*	0.372*	0.986	2.436	3.882	6.046	8.386	9.604	-0.132*
		31.1	-0.344*	0.272*	1.086	2.136	3.782	5.746	8.086	9.304	0.068*
		31.2	-0.444*	0.272*	1.186	2.236	3.882	5.946	8.186	9.404	0.068*
		31.3	-0.044*	0.572*	1.286	2.236	3.982	5.846	8.186	9.504	0.268*
		31.4	-0.044*	0.572*	1.386	2.536	4.082	5.946	8.186	9.504	0.268*
		31.5	-0.244*	0.372*	1.486	2.436	4.082	5.846	7.886	9.404	-0.032*
		31.6	-0.144*	0.572*	1.486	2.436	3.882	5.646	7.686	9.204	0.168*
		31.7	0.056*	0.672*	1.386	2.336	3.882	5.546	7.786	9.004	0.368*
		31.8	-0.144*	0.472*	1.486	2.436	3.882	5.646	7.886	9.104	0.268*
		31.9	-0.044*	0.472*	1.386	2.336	3.982	5.646	7.986	9.004	0.368*
		32	0.056*	0.572*	1.486	2.436	3.982	5.746	7.886	9.004	0.268*
		32.1	-0.044*	0.572*	1.686	2.636	3.782	5.646	7.886	9.004	0.368*
		32.2	-0.044*	0.572*	1.586	2.536	3.882	5.646	7.786	9.104	0.368*
		32.3	0.056*	0.572*	1.586	2.636	3.782	5.646	7.786	9.004	0.368*
		32.4	0.256*	0.772*	1.486	2.636	3.882	5.846	7.786	9.004	0.368*
		32.5	0.156*	0.772*	1.486	2.536	3.882	5.746	7.786	8.904	0.468*
		32.6	0.256*	0.772*	1.486	2.436	3.682	5.546	7.686	8.804	0.568*
		32.7	0.256*	0.772*	1.486	2.436	3.682	5.646	7.686	8.804	0.668*
		32.8	0.156*	0.672*	1.586	2.336	3.582	5.546	7.586	8.804	0.568*
		32.9	0.156*	0.672*	1.486	2.336	3.582	5.546	7.486	8.604	0.568*
		33	0.156*	0.672*	1.486	2.136	3.682	5.546	7.486	8.604	0.468*
		33.1	0.156*	0.572*	1.486	2.236	3.582	5.246	7.386	8.504	0.368*
		33.2	0.156*	0.672*	1.586	2.336	3.682	5.346	7.286	8.404	0.468*
		33.3	0.156*	0.672*	1.386	2.236	3.582	5.346	7.186	8.404	0.468*
		33.4	0.156*	0.672*	1.486	2.336	3.582	5.246	7.186	8.404	0.268*
		33.5	0.056*	0.572*	1.486	2.236	3.582	5.246	7.086	8.404	0.468*
		33.6	0.156*	0.672*	1.486	2.236	3.482	5.146	7.086	8.304	0.468*
		33.7	0.256*	0.672*	1.386	2.236	3.582	5.246	6.886	8.104	0.468*
		33.8	0.156*	0.672*	1.386	2.036	3.482	5.046	6.886	8.104	0.468*
		33.9	0.256*	0.872*	1.286	2.036	3.482	5.246	6.786	8.004	0.468*
		34	0.256*	0.772*	1.286	2.036	3.482	5.146	6.986	8.104	0.368*
		34.1	0.256*	0.772*	1.286	2.036	3.482	5.046	6.786	8.004	0.468*
		34.2	0.356*	0.972*	1.186	2.036	3.482	5.146	6.686	7.904	0.568*
		34.3	0.356*	0.972*	1.386	2.136	3.382	5.046	6.686	7.804	0.368*
		34.4	0.456*	0.872*	1.186	2.036	3.482	5.046	6.686	7.904	0.468*
		34.5	0.256*	0.772*	1.286	2.036	3.582	5.046	6.586	7.804	0.468*
		34.6	0.356*	0.972*	1.286	2.036	3.482	5.046	6.586	7.804	0.468*
		34.7	0.356*	0.872*	1.286	2.036	3.482	5.046	6.486	7.704	0.268*
		34.8	0.456*	0.972*	1.186	2.036	3.482	4.946	6.486	7.604	0.368*
		34.9	0.456*	0.972*	1.286	2.036	3.482	4.946	6.486	7.704	0.468*
		35	0.456*	0.972*	1.386	2.136	3.482	4.946	6.386	7.504	0.268*
		35.1	0.456*	0.972*	1.286	2.036	3.482	4.846	6.286	7.404	0.268*
		35.2	0.256*	0.772*	1.286	1.936	3.482	4.846	6.386	7.404	0.368*
		35.3	0.256*	0.772*	1.286	1.936	3.382	4.746	6.386	7.404	0.368*
		35.4	0.256*	0.772*	1.286	1.936	3.382	4.746	6.186	7.304	0.368*
		35.5	0.256*	0.772*	1.286	1.936	3.382	4.746	6.186	7.304	0.268*
		35.6	0.156*	0.672*	1.186	1.936	3.382	4.746	5.986	7.104	0.268*
		35.7	0.156*	0.772*	1.186	1.836	3.282	4.746	5.986	7.104	0.168*
		35.8	0.056*	0.772*	1.286	1.836	3.382	4.846	5.986	7.104	0.268*
		35.9	0.056*	0.772*	1.186	1.836	3.182	4.646	5.986	7.104	0.368*
		36	0.156*	0.872*	1.186	1.836	3.182	4.646	5.886	6.904	0.368*
		36.1	0.156*	0.772*	1.186	1.836	3.182	4.546	5.786	6.804	0.268*
		36.2	0.056*	0.672*	1.186	1.936	3.182	4.646	5.786	6.804	0.268*
		36.3	0.056*	0.672*	1.086	1.936	3.182	4.546	5.786	6.904	0.268*
		36.4	0.156*	0.772*	1.086	1.736	3.182	4.546	5.686	6.604	0.168*
		36.5	0.056*	0.772*	1.186	1.936	3.082	4.546	5.786	6.704	0.268*
		36.6	0.156*	0.672*	1.186	1.836	3.082	4.446	5.786	6.704	0.268*
		36.7	0.056*	0.572*	1.086	1.836	3.082	4.546	5.686	6.704	0.168*
		36.8	0.156*	0.772*	1.086	1.936	2.982	4.246	5.586	6.604	0.268*
		36.9	0.156*	0.772*	1.086	1.936	2.982	4.246	5.686	6.604	0.168*
		37	0.056*	0.572*	1.086	1.936	3.082	4.346	5.486	6.404	0.268*
		37.1	0.056*	0.572*	0.986	1.736	2.982	4.346	5.386	6.404	0.268*
		37.2	0.056*	0.572*	1.086	1.836	2.982	4.146	5.486	6.504	0.268*
		37.3	0.156*	0.572*	0.986	1.836	2.982	4.146	5.386	6.304	0.268*
		37.4	0.156*	0.572*	1.086	1.836	2.882	4.046	5.386	6.304	0.368*
		37.5	0.056*	0.572*	1.086	1.836	2.982	4.246	5.386	6.304	0.268*
		37.6	0.056*	0.572*	1.186	1.936	2.982	4.146	5.286	6.104	0.268*
		37.7	-0.044*	0.472*	1.086	1.736	2.882	4.046	5.186	6.104	0.168*
		37.8	-0.044*	0.472*	1.186	1.836	2.982	4.146	5.086	6.004	0.268*
		37.9	-0.044*	0.572*	1.086	1.736	2.982	4.046	5.186	6.104	0.268*
		38	0.056*	0.572*	1.086	1.736	2.882	4.046	5.086	6.104	0.268*
		38.1	0.156*	0.672*	1.186	1.736	2.882	3.946	4.986	6.004	0.268*
		38.2	0.056*	0.572*	1.086	1.736	2.982	4.046	4.986	6.004	0.168*
		38.3	0.056*	0.672*	0.986	1.636	2.882	3.946	4.886	5.904	0.268*
		38.4	0.056*	0.572*	0.986	1.636	2.882	3.946	4.886	5.904	0.168*
		38.5	0.156*	0.672*	1.086	1.636	2.982	3.946	4.786	5.704	0.068*
		38.6	0.056*	0.572*	0.986	1.636	2.882	3.846	4.886	5.904	0.268*
		38.7	0.256*	0.772*	1.086	1.736	2.782	3.846	4.686	5.804	0.068*
		38.8	0.156*	0.572*	0.986	1.536	2.782	3.746	4.886	5.804	0.168*
		38.9	0.156*	0.672*	0.986	1.636	2.782	3.846	4.686	5.704	0.068*
		39	0.156*	0.572*	0.986	1.536	2.682	3.646	4.786	5.604	0.068*
		39.1	0.156*	0.672*	0.886	1.536	2.782	3.746	4.586	5.604	0.168*
		39.2	0.156*	0.572*	0.886	1.536	2.582	3.646	4.686	5.604	0.068*
		39.3	0.156*	0.572*	0.886	1.536	2.682	3.746	4.586	5.504	0.068*
		39.4	0.256*	0.772*	0.986	1.536	2.482	3.546	4.686	5.504	0.068*
		39.5	0.156*	0.572*	0.986	1.536	2.582	3.646	4.586	5.504	0.068*
		39.6	0.256*	0.672*	0.986	1.536	2.482	3.546	4.586	5.504	0.068*
		39.7	0.056*	0.672*	0.886	1.436	2.482	3.546	4.586	5.404	0.168*
		39.8	0.156*	0.672*	0.986	1.536	2.482	3.546	4.586	5.404	0.068*
		39.9	0.056*	0.672*	0.986	1.536	2.582	3.646	4.486	5.304	0.068*
		40	0.156*	0.672*	0.986	1.536	2.382	3.446	4.486	5.304	0.068*
		40.1	0.056*	0.672*	0.986	1.536	2.482	3.646	4.386	5.204	0.068*
		40.2	0.256*	0.772*	0.886	1.536	2.282	3.446	4.386	5.304	0.168*
		40.3	0.056*	0.672*	0.986	1.436	2.382	3.446	4.386	5.204	-0.032*
		40.4	0.056*	0.472*	0.886	1.536	2.282	3.446	4.286	5.204	0.068*
		40.5	0.056*	0.672*	0.986	1.436	2.382	3.346	4.386	5.104	-0.032*
		40.6	0.156*	0.672*	0.886	1.536	2.282	3.346	4.286	5.204	0.068*
		40.7	0.056*	0.672*	0.986	1.536	2.282	3.346	4.186	5.104	0.168*
		40.8	0.156*	0.672*	0.886	1.536	2.182	3.246	4.186	5.004	0.068*
		40.9	0.056*	0.572*	0.786	1.336	2.282	3.246	4.286	5.104	0.168*
		41	0.156*	0.672*	0.886	1.536	2.182	3.346	4.186	5.004	0.068*
		41.1	0.156*	0.772*	0.786	1.436	2.182	3.146	4.286	5.104	0.168*
		41.2	0.156*	0.672*	0.886	1.536	2.282	3.246	4.186	4.904	-0.032*
		41.3	0.256*	0.772*	0.886	1.536	2.182	3.146	4.186	5.004	0.168*
		41.4	0.156*	0.672*	0.786	1.436	2.182	3.046	4.086	4.804	0.068*
		41.5	0.156*	0.572*	0.886	1.536	2.182	3.146	4.086	4.904	-0.032*
		41.6	0.156*	0.772*	0.886	1.436	2.182	3.046	4.086	4.804	0.068*
		41.7	0.156*	0.572*	0.886	1.536	2.282	3.046	3.986	4.804	-0.032*
		41.8	0.256*	0.772*	0.986	1.436	2.082	3.046	3.986	4.704	0.168*
		41.9	0.156*	0.572*	0.886	1.536	2.082	2.846	3.986	4.704	0.168*
		42	0.156*	0.672*	0.886	1.436	2.082	3.046	3.986	4.704	0.068*
		42.1	0.056*	0.672*	0.886	1.436	2.082	2.946	3.986	4.804	0.168*
		42.2	0.156*	0.572*	0.786	1.336	2.182	2.946	3.886	4.604	0.068*
		42.3	0.156*	0.672*	0.986	1.436	2.082	2.946	3.886	4.604	0.168*
		42.4	0.156*	0.572*	0.886	1.436	2.182	2.946	3.986	4.704	0.068*
		42.5	0.056*	0.572*	0.886	1.436	2.082	2.946	3.886	4.504	-0.032*
		42.6	0.256*	0.572*	0.886	1.436	2.082	2.846	3.886	4.604	0.168*
		42.7	0.156*	0.572*	0.786	1.336	1.982	2.846	3.886	4.604	0.068*
		42.8	0.056*	0.572*	0.786	1.336	2.082	2.846	3.786	4.504	0.168*
		42.9	0.156*	0.572*	0.886	1.336	1.982	2.846	3.786	4.504	0.168*
		43	0.156*	0.572*	0.786	1.336	2.082	2.846	3.686	4.404	0.068*
		43.1	0.156*	0.572*	0.886	1.336	1.982	2.746	3.786	4.404	0.068*
		43.2	0.156*	0.572*	0.886	1.336	1.982	2.846	3.686	4.404	0.168*
		43.3	0.156*	0.572*	0.786	1.336	1.982	2.646	3.686	4.404	0.068*
		43.4	0.156*	0.572*	0.886	1.336	1.982	2.846	3.686	4.304	0.168*
		43.5	0.156*	0.572*	0.786	1.236	1.882	2.746	3.586	4.304	0.168*
		43.6	0.156*	0.572*	0.786	1.336	1.882	2.646	3.486	4.204	0.068*
		43.7	0.156*	0.572*	0.886	1.236	1.882	2.746	3.586	4.204	0.168*
		43.8	0.156*	0.572*	0.886	1.436	1.982	2.646	3.586	4.204	0.068*
		43.9	0.156*	0.572*	0.786	1.336	1.882	2.546	3.386	4.204	0.168*
		44	0.156*	0.572*	0.886	1.336	1.782	2.546	3.586	4.204	0.068*
		44.1	0.256*	0.672*	0.786	1.336	1.982	2.546	3.486	4.204	0.068*
		44.2	0.156*	0.572*	0.786	1.236	1.882	2.646	3.386	4.104	0.168*
		44.3	0.156*	0.572*	0.786	1.236	1.882	2.546	3.386	4.104	0.068*
		44.4	0.156*	0.572*	0.786	1.336	1.882	2.446	3.386	4.004	0.168*
		44.5	0.256*	0.672*	0.686	1.236	1.882	2.546	3.286	4.004	0.168*
		44.6	0.256*	0.672*	0.786	1.236	1.682	2.346	3.286	4.004	0.168*
		44.7	0.156*	0.572*	0.786	1.336	1.882	2.446	3.286	3.904	0.168*
		44.8	0.156*	0.572*	0.686	1.236	1.682	2.346	3.386	4.004	0.068*
		44.9	0.256*	0.572*	0.786	1.236	1.682	2.346	3.286	3.904	0.068*
		45	0.256*	0.572*	0.686	1.336	1.682	2.346	3.286	3.904	0.168*
		45.1	0.156*	0.572*	0.786	1.236	1.782	2.346	3.186	3.804	0.068*
		45.2	0.156*	0.572*	0.786	1.236	1.682	2.346	3.186	3.704	0.168*
		45.3	0.256*	0.572*	0.786	1.236	1.682	2.346	3.186	3.804	0.168*
		45.4	0.156*	0.472*	0.586	1.136	1.782	2.446	3.186	3.704	0.168*
		45.5	0.156*	0.472*	0.786	1.236	1.582	2.346	3.086	3.704	0.068*
		45.6	0.056*	0.472*	0.786	1.236	1.682	2.246	3.286	3.704	0.168*
		45.7	0.156*	0.472*	0.586	1.136	1.682	2.346	3.186	3.704	0.168*
		45.8	0.256*	0.472*	0.786	1.136	1.582	2.246	3.086	3.604	0.068*
		45.9	0.056*	0.472*	0.786	1.136	1.582	2.246	3.186	3.604	0.168*
		46	0.056*	0.472*	0.586	1.136	1.682	2.246	3.186	3.704	0.168*
		46.1	0.056*	0.272*	0.686	1.036	1.582	2.246	3.086	3.504	0.168*
		46.2	0.156*	0.472*	0.786	1.136	1.582	2.246	2.986	3.504	0.168*
		46.3	0.056*	0.472*	0.786	1.236	1.582	2.146	3.086	3.604	0.168*
		46.4	0.156*	0.372*	0.586	1.036	1.582	2.246	3.086	3.604	0.168*
		46.5	0.156*	0.372*	0.686	1.036	1.582	2.146	2.886	3.504	0.168*
		46.6	0.056*	0.372*	0.786	1.136	1.482	2.046	2.886	3.404	0.168*
		46.7	0.056*	0.472*	0.686	1.036	1.482	2.046	2.886	3.404	0.168*
		46.8	0.156*	0.372*	0.686	1.036	1.382	2.046	2.986	3.504	0.168*
		46.9	0.156*	0.372*	0.686	0.936	1.582	2.146	2.886	3.404	0.168*
		47	0.056*	0.372*	0.586	0.936	1.482	2.046	2.786	3.404	0.068*
		47.1	-0.044*	0.372*	0.586	1.036	1.382	2.046	2.886	3.304	0.168*
		47.2	0.056*	0.272*	0.686	0.936	1.482	1.946	2.986	3.404	0.168*
		47.3	0.156*	0.472*	0.786	1.136	1.582	2.146	2.786	3.404	0.068*
		47.4	0.056*	0.372*	0.586	1.036	1.482	2.046	2.886	3.304	0.168*
		47.5	0.056*	0.372*	0.586	1.036	1.382	1.946	2.786	3.304	0.168*
		47.6	0.056*	0.372*	0.686	0.936	1.482	2.046	2.786	3.204	0.168*
		47.7	0.156*	0.372*	0.586	1.036	1.482	2.046	2.786	3.304	-0.032*
		47.8	0.156*	0.472*	0.586	1.036	1.382	1.946	2.686	3.304	0.168*
		47.9	0.056*	0.372*	0.686	1.036	1.382	1.946	2.786	3.204	0.168*
		48	0.056*	0.372*	0.686	1.036	1.382	1.946	2.786	3.204	0.068*
		48.1	0.056*	0.372*	0.486	0.936	1.482	2.046	2.786	3.304	-0.032*
		48.2	0.056*	0.472*	0.486	0.836	1.382	1.846	2.686	3.204	0.068*
		48.3	0.056*	0.372*	0.486	0.836	1.282	1.946	2.786	3.104	0.168*
		48.4	0.056*	0.372*	0.686	1.036	1.382	1.846	2.786	3.104	0.168*
		48.5	0.056*	0.372*	0.486	0.936	1.382	1.846	2.686	3.104	0.068*
		48.6	0.156*	0.372*	0.486	0.836	1.282	1.746	2.586	3.104	0.068*
		48.7	0.156*	0.472*	0.586	0.836	1.282	1.846	2.586	3.104	0.068*
		48.8	0.056*	0.372*	0.586	0.936	1.382	1.846	2.686	3.104	0.168*
		48.9	0.056*	0.372*	0.486	0.936	1.282	1.846	2.686	3.004	0.068*
		49	0.156*	0.372*	0.486	0.936	1.282	1.746	2.486	2.904	0.068*
		49.1	0.156*	0.572*	0.586	0.836	1.282	1.746	2.486	3.004	0.068*
		49.2	0.056*	0.472*	0.586	0.936	1.282	1.746	2.686	3.004	0.168*
		49.3	0.156*	0.372*	0.486	0.936	1.382	1.846	2.486	2.904	0.068*
		49.4	0.156*	0.372*	0.386	0.836	1.282	1.746	2.486	2.804	0.068*
		49.5	0.056*	0.472*	0.486	1.036	1.182	1.746	2.386	2.804	0.068*
		49.6	0.056*	0.472*	0.586	0.936	1.182	1.746	2.586	2.804	0.068*
		49.7	0.156*	0.372*	0.486	0.936	1.282	1.646	2.586	2.904	-0.032*
		49.8	0.156*	0.372*	0.386	0.836	1.282	1.746	2.386	2.704	0.068*
		49.9	0.156*	0.472*	0.386	0.936	1.182	1.746	2.386	2.704	0.068*
		50	0.056*	0.472*	0.486	0.836	1.182	1.746	2.286	2.604	0.068*
		50.1	0.156*	0.572*	0.486	0.936	1.282	1.646	2.286	2.504	0.068*
		50.2	0.156*	0.372*	0.386	0.836	1.182	1.646	2.386	2.704	-0.032*
		50.3	0.156*	0.472*	0.386	0.736	1.182	1.746	2.286	2.604	-0.032*
		50.4	0.056*	0.472*	0.386	0.736	1.182	1.746	2.386	2.604	0.068*
		50.5	0.156*	0.572*	0.386	0.836	1.082	1.546	2.286	2.404	0.168*
		50.6	0.156*	0.472*	0.486	0.936	0.982	1.546	2.286	2.504	0.068*
		50.7	0.156*	0.372*	0.386	0.836	1.182	1.646	2.286	2.604	-0.032*
		50.8	0.156*	0.472*	0.386	0.736	1.182	1.646	2.286	2.504	-0.032*
		50.9	0.056*	0.472*	0.386	0.736	1.082	1.746	2.186	2.404	0.068*
		51	0.156*	0.572*	0.386	0.836	0.982	1.546	2.186	2.404	0.068*
		51.1	0.256*	0.472*	0.486	0.936	0.982	1.546	2.286	2.504	0.168*
		51.2	0.156*	0.472*	0.386	0.736	1.082	1.646	2.186	2.404	-0.032*
		51.3	0.056*	0.472*	0.386	0.736	1.082	1.546	2.286	2.504	0.068*
		51.4	0.056*	0.472*	0.286	0.736	1.082	1.646	2.186	2.404	0.068*
		51.5	0.256*	0.572*	0.386	0.936	0.882	1.546	2.086	2.304	0.068*
		51.6	0.256*	0.672*	0.486	0.836	0.882	1.546	2.186	2.404	0.068*
		51.7	0.156*	0.472*	0.386	0.736	1.082	1.546	2.186	2.404	-0.032*
		51.8	0.156*	0.472*	0.286	0.736	1.082	1.546	2.186	2.504	0.068*
		51.9	0.156*	0.472*	0.286	0.736	0.982	1.446	2.186	2.404	0.068*
		52	0.156*	0.472*	0.286	0.636	0.882	1.546	2.086	2.304	0.068*
		52.1	0.056*	0.472*	0.386	0.736	0.882	1.546	1.986	2.304	0.068*
		52.2	0.156*	0.472*	0.386	0.736	0.982	1.446	2.086	2.404	0.168*
		52.3	0.156*	0.472*	0.386	0.736	1.082	1.546	2.186	2.404	0.068*
		52.4	0.156*	0.472*	0.286	0.636	0.982	1.546	2.086	2.404	0.068*
		52.5	0.156*	0.572*	0.386	0.636	0.882	1.346	1.986	2.304	0.068*
		52.6	0.156*	0.572*	0.386	0.636	0.982	1.446	1.986	2.204	0.068*
		52.7	0.056*	0.472*	0.486	0.836	0.982	1.446	1.986	2.204	0.168*
		52.8	0.156*	0.472*	0.486	0.736	0.982	1.446	2.086	2.304	0.168*
		52.9	0.156*	0.472*	0.286	0.636	0.882	1.446	2.086	2.304	0.068*
		53	0.156*	0.472*	0.286	0.636	0.882	1.346	1.986	2.304	0.068*
		53.1	0.056*	0.472*	0.286	0.636	0.982	1.446	1.886	2.204	0.068*
		53.2	0.056*	0.372*	0.386	0.636	0.982	1.446	1.886	2.204	0.068*
		53.3	0.256*	0.472*	0.486	0.736	0.882	1.446	1.886	2.204	0.168*
		53.4	0.156*	0.472*	0.386	0.636	0.982	1.446	2.086	2.204	0.068*
		53.5	0.156*	0.472*	0.286	0.636	0.882	1.346	1.986	2.204	0.068*
		53.6	0.156*	0.572*	0.386	0.636	0.882	1.346	1.886	2.204	0.068*
		53.7	0.056*	0.472*	0.386	0.636	0.982	1.446	1.886	2.204	0.068*
		53.8	0.056*	0.372*	0.386	0.636	0.882	1.346	1.886	2.104	0.068*
		53.9	0.256*	0.472*	0.386	0.636	0.882	1.346	1.886	2.104	0.168*
		54	0.256*	0.472*	0.386	0.636	0.982	1.446	1.686	2.004	0.168*
		54.1	0.256*	0.572*	0.286	0.536	0.982	1.346	1.886	2.204	0.168*
		54.2	0.056*	0.472*	0.386	0.536	0.982	1.446	1.886	2.204	0.068*
		54.3	0.056*	0.472*	0.386	0.636	0.982	1.346	1.786	2.104	0.068*
		54.4	0.156*	0.372*	0.386	0.636	0.882	1.346	1.786	2.104	0.168*
		54.5	0.256*	0.472*	0.386	0.636	0.882	1.346	1.686	2.004	0.068*
		54.6	0.256*	0.472*	0.286	0.536	0.882	1.146	1.786	2.004	0.168*
		54.7	0.156*	0.472*	0.386	0.536	0.982	1.246	1.786	2.104	0.168*
		54.8	0.056*	0.472*	0.386	0.536	0.982	1.346	1.786	2.104	0.168*
		54.9	0.056*	0.472*	0.386	0.636	0.882	1.346	1.786	2.004	0.268*
		55	0.056*	0.372*	0.386	0.636	0.882	1.246	1.686	1.904	0.168*
		55.1	0.156*	0.372*	0.386	0.536	0.982	1.246	1.586	1.904	0.168*
		55.2	0.156*	0.472*	0.386	0.536	0.982	1.246	1.686	1.804	0.168*
		55.3	0.156*	0.472*	0.286	0.436	0.982	1.246	1.686	1.904	0.168*
		55.4	0.056*	0.472*	0.286	0.536	0.882	1.246	1.686	1.904	0.268*
		55.5	0.056*	0.472*	0.386	0.636	0.882	1.246	1.686	1.904	0.268*
		55.6	0.156*	0.472*	0.386	0.536	0.882	1.246	1.586	1.804	0.268*
		55.7	0.156*	0.372*	0.386	0.536	0.882	1.246	1.686	1.804	0.168*
		55.8	0.056*	0.372*	0.386	0.536	0.982	1.346	1.686	1.704	0.168*
		55.9	-0.044*	0.372*	0.386	0.536	0.882	1.246	1.586	1.804	0.168*
		56	0.056*	0.472*	0.286	0.536	0.782	1.146	1.586	1.804	0.168*
		56.1	0.156*	0.472*	0.286	0.536	0.882	1.246	1.486	1.604	0.268*
		56.2	0.156*	0.372*	0.386	0.536	0.882	1.246	1.486	1.604	0.268*
		56.3	0.056*	0.272*	0.386	0.536	0.782	1.246	1.486	1.704	0.168*
		56.4	0.056*	0.272*	0.386	0.536	0.782	1.146	1.586	1.704	0.168*
		56.5	-0.044*	0.372*	0.386	0.536	0.882	1.246	1.586	1.704	0.268*
		56.6	0.156*	0.472*	0.286	0.436	0.882	1.246	1.586	1.704	0.268*
		56.7	0.156*	0.472*	0.386	0.536	0.882	1.246	1.486	1.604	0.268*
		56.8	0.156*	0.472*	0.386	0.536	0.782	1.046	1.386	1.504	0.268*
		56.9	0.056*	0.372*	0.386	0.536	0.682	1.046	1.386	1.504	0.268*
		57	0.056*	0.472*	0.386	0.536	0.782	1.146	1.586	1.604	0.168*
		57.1	-0.044*	0.372*	0.386	0.536	0.882	1.246	1.586	1.704	0.168*
		57.2	0.056*	0.372*	0.286	0.436	0.882	1.146	1.586	1.604	0.268*
		57.3	0.056*	0.372*	0.386	0.636	0.882	1.146	1.486	1.604	0.368*
		57.4	0.056*	0.372*	0.386	0.536	0.682	1.046	1.386	1.504	0.268*
		57.5	0.056*	0.372*	0.386	0.536	0.682	1.046	1.486	1.504	0.268*
		57.6	0.056*	0.372*	0.386	0.536	0.782	0.946	1.486	1.604	0.168*
		57.7	-0.044*	0.472*	0.386	0.536	0.782	0.946	1.486	1.504	0.168*
		57.8	0.056*	0.472*	0.286	0.436	0.782	1.046	1.486	1.504	0.168*
		57.9	0.056*	0.372*	0.386	0.636	0.682	1.046	1.486	1.604	0.268*
		58	0.056*	0.372*	0.386	0.636	0.682	1.046	1.386	1.504	0.368*
		58.1	0.056*	0.372*	0.386	0.636	0.682	1.046	1.386	1.504	0.368*
		58.2	0.056*	0.372*	0.386	0.536	0.782	0.946	1.486	1.404	0.368*
		58.3	0.056*	0.372*	0.386	0.536	0.782	0.946	1.486	1.504	0.268*
		58.4	0.156*	0.372*	0.286	0.536	0.782	1.046	1.386	1.504	0.168*
		58.5	0.056*	0.372*	0.386	0.536	0.682	0.946	1.386	1.504	0.268*
		58.6	0.056*	0.372*	0.386	0.636	0.582	0.946	1.486	1.604	0.268*
		58.7	0.056*	0.372*	0.386	0.536	0.582	0.846	1.486	1.504	0.268*
		58.8	0.056*	0.372*	0.386	0.536	0.582	0.846	1.386	1.404	0.268*
		58.9	0.156*	0.372*	0.386	0.536	0.782	1.046	1.386	1.404	0.268*
		59	0.156*	0.372*	0.386	0.536	0.682	0.946	1.386	1.504	0.268*
		59.1	0.156*	0.472*	0.286	0.436	0.582	0.946	1.386	1.504	0.168*
		59.2	0.056*	0.272*	0.386	0.536	0.582	0.846	1.386	1.504	0.268*
		59.3	0.056*	0.272*	0.286	0.536	0.582	0.846	1.386	1.504	0.268*
		59.4	0.056*	0.272*	0.386	0.636	0.582	0.846	1.286	1.404	0.268*
		59.5	0.056*	0.372*	0.286	0.436	0.582	0.846	1.386	1.504	0.268*
		59.6	0.056*	0.372*	0.286	0.436	0.582	0.746	1.386	1.504	0.268*
		59.7	0.156*	0.372*	0.286	0.436	0.482	0.746	1.386	1.504	0.168*
		59.8	0.156*	0.272*	0.286	0.436	0.582	0.846	1.286	1.504	0.268*
		59.9	0.056*	0.272*	0.286	0.436	0.582	0.846	1.286	1.504	0.268*
		60	0.056*	0.272*	0.286	0.536	0.582	0.746	1.186	1.304	0.268*
		60.1	0.056*	0.272*	0.186	0.436	0.482	0.746	1.286	1.304	0.168*
		60.2	0.056*	0.272*	0.286	0.436	0.582	0.746	1.386	1.404	0.168*
		60.3	-0.044*	0.272*	0.286	0.436	0.482	0.746	1.286	1.504	0.268*
		60.4	-0.044*	0.272*	0.286	0.436	0.482	0.746	1.286	1.504	0.268*
		60.5	0.156*	0.472*	0.286	0.536	0.482	0.746	1.286	1.504	0.268*
		60.6	0.156*	0.372*	0.286	0.536	0.482	0.646	1.286	1.404	0.268*
		60.7	0.156*	0.372*	0.286	0.436	0.582	0.746	1.286	1.404	0.168*
		60.8	0.056*	0.272*	0.286	0.436	0.382	0.746	1.186	1.304	0.168*
		60.9	0.056*	0.272*	0.186	0.336	0.482	0.746	1.286	1.504	0.168*
		61	0.056*	0.272*	0.186	0.336	0.482	0.746	1.286	1.504	0.168*
		61.1	0.056*	0.272*	0.186	0.336	0.482	0.646	1.286	1.504	0.168*
		61.2	0.156*	0.372*	0.086	0.336	0.482	0.646	1.286	1.404	0.268*
		61.3	0.156*	0.272*	0.086	0.336	0.482	0.646	1.186	1.404	0.068*
		61.4	0.056*	0.272*	0.286	0.436	0.382	0.746	1.186	1.404	0.168*
		61.5	0.056*	0.272*	0.286	0.436	0.382	0.746	1.086	1.304	0.168*
		61.6	0.056*	0.272*	0.186	0.336	0.382	0.646	1.086	1.304	0.168*
		61.7	0.056*	0.272*	0.186	0.336	0.382	0.646	1.186	1.404	0.168*
		61.8	0.056*	0.272*	0.186	0.336	0.482	0.646	1.186	1.304	0.068*
		61.9	0.056*	0.272*	0.086	0.336	0.482	0.646	1.086	1.304	0.068*
		62	-0.044*	0.172*	0.186	0.436	0.382	0.746	1.186	1.404	0.068*
		62.1	-0.044*	0.272*	0.186	0.336	0.382	0.746	1.186	1.404	0.068*
		62.2	-0.044*	0.172*	0.186	0.336	0.382	0.746	1.186	1.304	0.068*
		62.3	0.056*	0.272*	0.186	0.336	0.282	0.546	1.186	1.404	0.168*
		62.4	0.056*	0.272*	0.086	0.236	0.282	0.546	1.086	1.304	0.168*
		62.5	0.056*	0.272*	0.186	0.336	0.282	0.546	1.086	1.304	0.168*
		62.6	0.056*	0.272*	0.186	0.336	0.482	0.646	1.086	1.304	-0.032*
		62.7	0.056*	0.272*	0.086	0.336	0.382	0.646	1.086	1.204	0.068*
		62.8	-0.044*	0.172*	0.086	0.436	0.382	0.746	1.186	1.404	0.068*
		62.9	-0.044*	0.272*	0.086	0.336	0.382	0.646	1.186	1.404	0.068*
		63	0.056*	0.372*	0.186	0.336	0.382	0.646	1.086	1.404	0.068*
		63.1	0.056*	0.272*	0.086	0.236	0.282	0.546	1.086	1.404	0.068*
		63.2	0.056*	0.272*	0.086	0.236	0.282	0.546	1.086	1.304	-0.032*
		63.3	0.056*	0.272*	0.086	0.236	0.382	0.646	1.086	1.204	0.068*
		63.4	0.056*	0.272*	0.086	0.236	0.382	0.646	1.086	1.204	0.068*
		63.5	0.056*	0.272*	-0.014	0.336	0.482	0.746	1.086	1.304	0.068*
		63.6	-0.044*	0.172*	0.086	0.236	0.482	0.746	0.986	1.204	0.068*
		63.7	-0.044*	0.272*	0.086	0.236	0.382	0.646	0.986	1.204	0.068*
		63.8	-0.044*	0.272*	0.086	0.236	0.382	0.646	0.986	1.204	0.068*
		63.9	0.056*	0.272*	0.186	0.336	0.282	0.546	0.886	1.104	-0.032*
		64	0.056*	0.272*	0.186	0.336	0.382	0.646	0.886	1.204	-0.032*
		64.1	0.056*	0.272*	0.086	0.336	0.482	0.646	0.886	1.204	-0.032*
		64.2	0.056*	0.272*	-0.014	0.336	0.482	0.646	0.986	1.204	-0.032*
		64.3	0.056*	0.272*	-0.014	0.336	0.482	0.646	0.986	1.204	0.068*
		64.4	0.056*	0.372*	-0.014	0.236	0.482	0.646	0.986	1.204	0.068*
		64.5	-0.144*	0.272*	-0.014	0.236	0.382	0.646	0.986	1.204	0.068*
		64.6	0.056*	0.372*	0.086	0.236	0.382	0.646	0.886	1.104	0.068*
		64.7	0.056*	0.372*	0.086	0.236	0.382	0.646	0.886	1.104	-0.032*
		64.8	0.056*	0.372*	0.086	0.236	0.282	0.546	0.786	1.004	-0.032*
		64.9	0.056*	0.272*	-0.014	0.236	0.282	0.546	0.886	1.004	-0.032*
		65	0.056*	0.272*	-0.114	0.236	0.382	0.646	0.986	1.204	-0.032*
		65.1	0.056*	0.272*	-0.014	0.336	0.482	0.546	0.886	1.204	-0.032*
		65.2	-0.044*	0.272*	-0.014	0.336	0.482	0.546	0.886	1.204	0.068*
		65.3	0.056*	0.372*	0.086	0.236	0.382	0.546	0.886	1.104	0.068*
		65.4	0.056*	0.372*	0.086	0.236	0.382	0.646	0.786	1.004	0.068*
		65.5	0.056*	0.372*	0.086	0.236	0.382	0.646	0.786	1.004	-0.032*
		65.6	0.056*	0.372*	0.086	0.236	0.382	0.646	0.786	1.004	-0.032*
		65.7	0.056*	0.372*	-0.014	0.236	0.482	0.646	0.786	1.004	-0.032*
		65.8	0.056*	0.372*	-0.014	0.336	0.482	0.646	0.786	1.004	-0.032*
		65.9	0.056*	0.372*	-0.114	0.236	0.382	0.446	0.886	1.004	0.068*
		66	0.056*	0.372*	-0.014	0.236	0.482	0.546	0.886	1.004	0.168*
		66.1	0.156*	0.472*	0.086	0.236	0.382	0.646	0.886	1.104	0.168*
		66.2	0.056*	0.372*	0.086	0.236	0.382	0.646	0.886	1.104	0.068*
		66.3	0.056*	0.372*	-0.014	0.236	0.382	0.646	0.886	1.104	0.068*
		66.4	0.056*	0.372*	-0.014	0.236	0.382	0.646	0.686	0.904	0.068*
		66.5	0.056*	0.272*	-0.014	0.236	0.382	0.646	0.686	0.904	0.068*
		66.6	0.056*	0.272*	-0.014	0.236	0.282	0.446	0.786	0.904	0.168*
		66.7	0.056*	0.372*	-0.014	0.236	0.282	0.446	0.786	0.904	0.068*
		66.8	0.056*	0.372*	0.086	0.336	0.382	0.446	0.886	1.004	0.068*
		66.9	0.056*	0.372*	-0.114	0.136	0.382	0.446	0.886	1.004	0.068*
		67	0.156*	0.372*	-0.114	0.136	0.482	0.546	0.886	1.004	0.068*
		67.1	0.156*	0.372*	-0.014	0.236	0.382	0.646	0.686	0.804	0.168*
		67.2	0.156*	0.372*	-0.014	0.236	0.382	0.646	0.686	0.904	0.168*
		67.3	0.056*	0.372*	-0.014	0.236	0.382	0.646	0.686	0.904	0.068*
		67.4	0.056*	0.372*	-0.014	0.236	0.382	0.546	0.686	0.904	0.068*
		67.5	0.056*	0.272*	0.086	0.236	0.382	0.546	0.686	0.904	0.068*
		67.6	0.056*	0.372*	0.086	0.236	0.482	0.546	0.686	0.804	0.168*
		67.7	-0.044*	0.272*	-0.014	0.236	0.382	0.446	0.786	0.904	0.068*
		67.8	0.056*	0.272*	-0.114	0.136	0.382	0.446	0.786	0.804	0.068*
		67.9	0.056*	0.272*	-0.014	0.236	0.282	0.546	0.786	0.804	0.168*
		68	0.056*	0.272*	-0.014	0.236	0.282	0.546	0.786	0.804	0.168*
		68.1	0.056*	0.272*	-0.014	0.236	0.282	0.546	0.786	0.804	0.168*
		68.2	0.156*	0.372*	-0.014	0.236	0.382	0.546	0.786	0.804	0.068*
		68.3	0.056*	0.472*	-0.014	0.236	0.382	0.546	0.686	0.704	0.068*
		68.4	0.056*	0.372*	-0.014	0.236	0.382	0.546	0.686	0.704	0.068*
		68.5	0.056*	0.272*	0.086	0.236	0.382	0.546	0.786	0.904	0.068*
		68.6	0.056*	0.272*	0.086	0.236	0.282	0.446	0.686	0.804	0.068*
		68.7	0.056*	0.272*	0.086	0.236	0.282	0.446	0.686	0.804	0.068*
		68.8	0.056*	0.272*	0.086	0.236	0.282	0.346	0.686	0.804	0.068*
		68.9	0.056*	0.272*	0.086	0.236	0.282	0.346	0.786	0.804	0.168*
		69	0.056*	0.272*	-0.014	0.236	0.282	0.446	0.786	0.704	0.168*
		69.1	0.056*	0.272*	-0.014	0.236	0.282	0.446	0.786	0.704	0.168*
		69.2	-0.044*	0.272*	-0.014	0.236	0.282	0.446	0.786	0.704	0.168*
		69.3	-0.044*	0.272*	-0.014	0.336	0.282	0.446	0.686	0.704	0.168*
		69.4	0.056*	0.172*	-0.014	0.336	0.182	0.446	0.686	0.704	0.068*
		69.5	0.056*	0.272*	0.086	0.336	0.282	0.346	0.686	0.804	0.068*
		69.6	0.056*	0.272*	0.086	0.336	0.282	0.346	0.686	0.804	0.068*
		69.7	0.056*	0.272*	0.086	0.236	0.282	0.446	0.686	0.804	0.068*
		69.8	0.056*	0.272*	-0.014	0.136	0.282	0.446	0.786	0.704	0.068*
		69.9	0.056*	0.372*	0.086	0.236	0.282	0.446	0.786	0.704	0.068*
		70	0.056*	0.372*	0.086	0.336	0.282	0.446	0.786	0.704	0.068*
		70.1	0.056*	0.372*	0.086	0.336	0.182	0.346	0.786	0.704	0.168*
		70.2	-0.044*	0.272*	0.086	0.336	0.182	0.246	0.686	0.704	0.068*
		70.3	0.056*	0.172*	0.086	0.336	0.182	0.246	0.686	0.704	0.068*
		70.4	0.056*	0.172*	-0.014	0.336	0.182	0.346	0.586	0.604	-0.032*
		70.5	0.056*	0.172*	-0.014	0.336	0.182	0.346	0.686	0.604	0.068*
		70.6	0.056*	0.172*	0.086	0.236	0.182	0.346	0.686	0.704	0.068*
		70.7	0.056*	0.272*	-0.014	0.136	0.282	0.346	0.686	0.704	0.068*
		70.8	0.056*	0.372*	0.086	0.236	0.282	0.346	0.686	0.704	0.068*
		70.9	-0.044*	0.272*	0.086	0.336	0.282	0.346	0.586	0.704	0.168*
		71	0.056*	0.272*	0.086	0.336	0.382	0.346	0.586	0.704	0.068*
		71.1	0.056*	0.172*	0.086	0.336	0.182	0.246	0.686	0.704	0.068*
		71.2	0.056*	0.172*	0.086	0.336	0.182	0.246	0.686	0.604	0.068*
		71.3	0.056*	0.172*	0.086	0.336	0.182	0.346	0.586	0.504	0.068*
		71.4	0.056*	0.172*	0.086	0.336	0.182	0.246	0.586	0.504	0.068*
		71.5	0.056*	0.272*	0.086	0.236	0.182	0.246	0.486	0.604	-0.032*
		71.6	0.056*	0.272*	0.086	0.236	0.182	0.246	0.586	0.704	-0.032*
		71.7	-0.044*	0.272*	0.086	0.236	0.282	0.346	0.586	0.704	0.068*
		71.8	-0.044*	0.272*	-0.014	0.236	0.282	0.346	0.586	0.704	0.068*
		71.9	-0.044*	0.272*	0.086	0.336	0.182	0.346	0.586	0.704	0.068*
		72	0.056*	0.272*	0.086	0.336	0.282	0.246	0.686	0.704	0.068*
		72.1	0.056*	0.272*	0.086	0.336	0.282	0.346	0.586	0.604	0.068*
		72.2	0.056*	0.272*	0.086	0.336	0.282	0.346	0.586	0.604	0.068*
		72.3	0.056*	0.272*	0.086	0.236	0.182	0.246	0.486	0.604	0.068*
		72.4	0.056*	0.272*	0.086	0.236	0.182	0.246	0.486	0.604	0.068*
		72.5	0.056*	0.272*	0.086	0.336	0.182	0.246	0.486	0.604	-0.132*
		72.6	0.056*	0.272*	0.086	0.336	0.082	0.246	0.486	0.604	-0.132*
		72.7	0.056*	0.272*	-0.014	0.236	0.082	0.246	0.486	0.604	-0.032*
		72.8	0.056*	0.372*	0.086	0.336	0.282	0.346	0.586	0.704	0.068*
		72.9	0.056*	0.272*	0.086	0.336	0.282	0.246	0.586	0.704	0.068*
		73	-0.044*	0.272*	0.086	0.236	0.282	0.246	0.486	0.704	0.068*
		73.1	0.056*	0.272*	0.086	0.236	0.282	0.346	0.486	0.504	0.068*
		73.2	0.056*	0.272*	0.086	0.236	0.282	0.346	0.486	0.504	-0.032*
		73.3	0.056*	0.272*	0.086	0.236	0.282	0.346	0.486	0.504	-0.032*
		73.4	0.056*	0.272*	0.086	0.236	0.182	0.246	0.486	0.604	0.068*
		73.5	-0.044*	0.172*	-0.014	0.236	0.182	0.146	0.486	0.604	-0.032*
		73.6	-0.044*	0.272*	-0.014	0.236	0.182	0.146	0.486	0.604	-0.032*
		73.7	0.056*	0.372*	-0.014	0.136	0.182	0.146	0.486	0.604	-0.032*
		73.8	0.056*	0.272*	0.086	0.136	0.182	0.146	0.286	0.404	-0.032*
		73.9	-0.044*	0.272*	-0.014	0.136	0.182	0.146	0.286	0.404	0.068*
		74	-0.044*	0.272*	-0.014	0.136	0.282	0.346	0.386	0.504	-0.032*
		74.1	0.056*	0.272*	0.086	0.236	0.282	0.346	0.386	0.504	-0.032*
		74.2	0.056*	0.272*	0.086	0.236	0.182	0.246	0.486	0.504	0.068*
		74.3	0.056*	0.272*	0.086	0.136	0.182	0.246	0.486	0.604	-0.032*
		74.4	0.056*	0.272*	0.086	0.236	0.082	0.146	0.486	0.604	-0.032*
		74.5	0.056*	0.372*	0.186	0.236	0.182	0.146	0.386	0.604	-0.032*
		74.6	-0.044*	0.272*	0.086	0.136	0.182	0.146	0.286	0.504	-0.032*
		74.7	0.056*	0.372*	-0.014	0.136	0.182	0.146	0.286	0.504	-0.032*
		74.8	0.056*	0.272*	-0.014	0.136	0.282	0.346	0.286	0.504	-0.032*
		74.9	-0.044*	0.272*	-0.014	0.136	0.282	0.346	0.386	0.504	-0.032*
		75	-0.044*	0.272*	-0.014	0.136	0.282	0.346	0.486	0.504	0.168*
		75.1	0.056*	0.272*	0.086	0.236	0.282	0.246	0.486	0.504	0.068*
		75.2	0.056*	0.272*	0.186	0.236	0.282	0.246	0.386	0.504	0.068*
		75.3	0.056*	0.272*	0.186	0.136	0.182	0.246	0.386	0.504	0.068*
		75.4	0.056*	0.272*	0.186	0.136	0.182	0.146	0.286	0.404	0.068*
		75.5	0.056*	0.272*	0.186	0.136	0.182	0.146	0.286	0.404	-0.032*
		75.6	0.056*	0.372*	0.086	0.136	0.182	0.146	0.286	0.404	-0.032*
		75.7	0.056*	0.372*	0.086	0.136	0.182	0.146	0.386	0.404	-0.032*
		75.8	0.056*	0.372*	0.086	0.136	0.282	0.146	0.386	0.404	0.068*
		75.9	-0.044*	0.272*	0.086	0.136	0.282	0.146	0.386	0.404	0.068*
		76	0.056*	0.272*	0.186	0.236	0.282	0.146	0.486	0.504	0.068*
		76.1	0.056*	0.272*	0.186	0.236	0.282	0.246	0.386	0.504	0.068*
		76.2	0.056*	0.272*	0.186	0.236	0.282	0.246	0.286	0.404	0.068*
		76.3	0.056*	0.272*	0.186	0.136	0.382	0.246	0.286	0.404	0.068*
		76.4	0.056*	0.272*	0.186	0.136	0.182	0.146	0.286	0.404	0.068*
		76.5	0.056*	0.272*	0.186	0.136	0.282	0.246	0.386	0.404	-0.032*
		76.6	0.056*	0.272*	0.086	0.036	0.282	0.246	0.386	0.404	0.068*
		76.7	0.056*	0.472*	0.086	0.136	0.282	0.246	0.386	0.404	0.068*
		76.8	-0.044*	0.372*	0.186	0.136	0.282	0.246	0.386	0.404	0.168*
		76.9	0.056*	0.372*	0.186	0.136	0.282	0.246	0.386	0.404	0.168*
		77	0.056*	0.272*	0.186	0.136	0.282	0.246	0.386	0.504	0.168*
		77.1	0.056*	0.272*	0.286	0.236	0.282	0.246	0.286	0.404	0.168*
		77.2	0.056*	0.272*	0.186	0.236	0.382	0.246	0.286	0.404	0.168*
		77.3	0.056*	0.272*	0.186	0.236	0.382	0.246	0.286	0.404	0.068*
		77.4	0.056*	0.272*	0.186	0.136	0.182	0.146	0.486	0.504	-0.032*
		77.5	0.056*	0.272*	0.186	0.136	0.182	0.146	0.486	0.504	-0.032*
		77.6	0.156*	0.372*	0.086	0.136	0.282	0.246	0.486	0.404	-0.032*
		77.7	0.156*	0.372*	0.186	0.136	0.282	0.246	0.386	0.404	0.168*
		77.8	0.156*	0.372*	0.186	0.136	0.282	0.246	0.386	0.404	0.168*
		77.9	0.156*	0.472*	0.286	0.236	0.282	0.146	0.286	0.404	0.168*
		78	0.156*	0.372*	0.286	0.236	0.282	0.146	0.286	0.404	0.168*
		78.1	0.056*	0.372*	0.286	0.236	0.282	0.246	0.286	0.404	0.168*
		78.2	0.056*	0.372*	0.286	0.236	0.282	0.246	0.386	0.504	0.168*
		78.3	0.056*	0.272*	0.186	0.236	0.182	0.146	0.486	0.404	0.168*
		78.4	0.056*	0.272*	0.186	0.236	0.182	0.146	0.486	0.404	0.168*
		78.5	0.056*	0.272*	0.186	0.236	0.182	0.146	0.486	0.404	0.268*
		78.6	0.156*	0.372*	0.186	0.136	0.282	0.246	0.386	0.404	0.068*
		78.7	0.156*	0.372*	0.186	0.036	0.282	0.246	0.386	0.404	0.068*
		78.8	0.056*	0.272*	0.186	0.036	0.282	0.246	0.386	0.404	0.168*
		78.9	0.056*	0.272*	0.286	0.236	0.282	0.246	0.486	0.504	0.168*
		79	0.056*	0.372*	0.286	0.236	0.282	0.146	0.486	0.604	0.168*
		79.1	0.056*	0.372*	0.286	0.236	0.282	0.146	0.386	0.504	0.168*
		79.2	0.056*	0.372*	0.286	0.236	0.182	0.046	0.386	0.404	0.168*
		79.3	0.056*	0.372*	0.286	0.236	0.182	0.146	0.486	0.404	0.168*
		79.4	0.056*	0.372*	0.186	0.136	0.082	0.146	0.486	0.404	0.268*
		79.5	0.056*	0.372*	0.186	0.136	0.182	0.246	0.386	0.404	0.168*
		79.6	-0.044*	0.272*	0.186	0.236	0.282	0.246	0.486	0.604	0.168*
		79.7	-0.044*	0.272*	0.186	0.136	0.282	0.246	0.486	0.604	0.168*
		79.8	-0.044*	0.372*	0.286	0.236	0.282	0.246	0.486	0.604	0.168*
		79.9	-0.044*	0.372*	0.286	0.236	0.282	0.246	0.486	0.504	0.168*
		80	-0.044*	0.372*	0.286	0.236	0.282	0.146	0.486	0.504	0.068*
		80.1	-0.044*	0.372*	0.186	0.136	0.282	0.146	0.486	0.504	0.068*
		80.2	0.056*	0.372*	0.186	0.136	0.182	0.146	0.486	0.504	0.168*
		80.3	0.056*	0.372*	0.186	0.136	0.182	0.146	0.486	0.504	0.168*
		80.4	-0.044*	0.272*	0.086	0.136	0.182	0.146	0.386	0.404	0.168*
		80.5	-0.044*	0.272*	0.086	0.136	0.182	0.146	0.286	0.404	0.068*
		80.6	-0.044*	0.272*	0.086	0.236	0.182	0.146	0.386	0.504	0.068*
		80.7	-0.044*	0.272*	0.186	0.336	0.082	0.146	0.386	0.504	0.068*
		80.8	-0.044*	0.372*	0.286	0.236	0.282	0.246	0.386	0.504	0.168*
		80.9	-0.044*	0.372*	0.286	0.236	0.182	0.046	0.486	0.604	0.168*
		81	-0.044*	0.372*	0.186	0.136	0.182	0.046	0.486	0.504	0.168*
		81.1	0.056*	0.372*	0.186	0.136	0.182	0.046	0.486	0.504	0.168*
		81.2	-0.044*	0.272*	0.186	0.136	0.182	0.146	0.486	0.504	0.268*
		81.3	-0.044*	0.372*	0.086	0.136	0.182	0.146	0.486	0.504	0.268*
		81.4	-0.044*	0.372*	0.086	0.136	0.182	0.146	0.386	0.504	0.168*
		81.5	-0.144*	0.372*	0.086	0.136	0.082	0.146	0.286	0.504	0.168*
		81.6	-0.144*	0.372*	0.086	0.136	0.082	0.146	0.386	0.504	0.068*
		81.7	-0.144*	0.272*	0.086	0.036	0.082	0.146	0.386	0.504	0.168*
		81.8	-0.144*	0.272*	0.086	0.136	0.082	0.046	0.386	0.504	0.168*
		81.9	-0.044*	0.372*	0.186	0.136	0.182	0.046	0.386	0.504	0.168*
		82	-0.144*	0.272*	0.186	0.136	0.182	0.146	0.386	0.504	0.168*
		82.1	-0.144*	0.272*	0.186	0.136	0.182	0.146	0.386	0.504	0.168*
		82.2	-0.044*	0.372*	0.186	0.136	0.182	0.146	0.486	0.604	0.168*
		82.3	-0.044*	0.372*	0.086	0.136	0.182	0.146	0.486	0.604	0.168*
		82.4	-0.044*	0.372*	0.086	0.136	0.082	0.146	0.486	0.604	0.168*
		82.5	-0.044*	0.272*	0.086	0.136	0.082	0.146	0.386	0.504	0.168*
		82.6	-0.044*	0.272*	0.086	0.136	0.082	0.046	0.486	0.504	0.168*
		82.7	-0.044*	0.272*	-0.014	0.136	0.082	-0.054	0.486	0.504	0.068*
		82.8	-0.144*	0.172*	0.086	0.136	0.082	-0.054	0.486	0.504	0.068*
		82.9	-0.244*	0.172*	0.086	0.136	0.082	0.046	0.386	0.504	0.068*
		83	-0.144*	0.372*	0.086	0.136	0.082	0.046	0.386	0.504	0.068*
		83.1	-0.044*	0.372*	0.086	0.036	0.182	0.146	0.386	0.504	0.168*
		83.2	-0.044*	0.372*	0.186	0.136	0.182	0.146	0.386	0.504	0.168*
		83.3	-0.044*	0.372*	0.086	0.136	0.182	0.146	0.386	0.504	0.068*
		83.4	-0.044*	0.372*	0.086	0.136	0.082	0.046	0.286	0.404	0.068*
		83.5	-0.044*	0.272*	0.086	0.136	-0.018	0.046	0.386	0.404	0.168*
		83.6	-0.044*	0.272*	-0.014	0.036	0.082	0.046	0.386	0.404	0.168*
		83.7	-0.044*	0.372*	0.086	0.036	0.082	0.146	0.386	0.404	0.168*
		83.8	-0.144*	0.272*	0.086	0.036	0.082	0.146	0.386	0.404	0.168*
		83.9	-0.144*	0.272*	0.086	0.036	0.082	0.046	0.486	0.504	0.168*
		84	-0.144*	0.272*	0.086	0.136	0.082	0.046	0.486	0.504	0.168*
		84.1	-0.144*	0.272*	0.086	0.136	0.082	0.046	0.486	0.504	0.068*
		84.2	0.056*	0.372*	0.086	0.136	0.082	0.046	0.286	0.404	0.068*
		84.3	0.056*	0.272*	0.086	0.136	0.082	0.146	0.386	0.504	0.068*
		84.4	-0.044*	0.272*	-0.014	0.136	0.182	0.146	0.386	0.404	0.068*
		84.5	-0.044*	0.272*	-0.014	0.136	0.182	0.246	0.386	0.404	0.068*
		84.6	-0.144*	0.172*	-0.014	0.036	0.082	0.146	0.386	0.404	0.068*
		84.7	-0.144*	0.172*	-0.014	0.036	0.082	0.146	0.386	0.404	0.068*
		84.8	-0.144*	0.272*	0.086	0.036	0.082	0.146	0.386	0.404	0.168*
		84.9	-0.144*	0.272*	0.086	0.036	0.082	0.046	0.386	0.404	0.268*
		85	-0.144*	0.272*	0.086	0.036	0.082	0.046	0.286	0.304	0.268*
		85.1	-0.044*	0.272*	0.086	0.136	0.082	0.046	0.386	0.404	0.268*
		85.2	-0.044*	0.172*	0.086	0.136	0.082	0.046	0.486	0.404	0.068*
		85.3	-0.044*	0.172*	-0.014	0.136	-0.018	0.046	0.486	0.304	0.068*
		85.4	-0.044*	0.172*	-0.014	0.136	-0.018	0.146	0.386	0.304	0.068*
		85.5	0.056*	0.272*	-0.014	0.136	0.182	0.246	0.386	0.404	0.068*
		85.6	-0.044*	0.272*	0.086	0.136	0.082	0.146	0.386	0.404	0.068*
		85.7	-0.144*	0.272*	0.086	0.036	0.082	0.146	0.386	0.404	0.068*
		85.8	-0.044*	0.272*	0.086	0.036	0.082	0.146	0.386	0.404	0.168*
		85.9	-0.044*	0.272*	0.086	0.036	0.082	0.146	0.386	0.404	0.168*
		86	-0.044*	0.172*	-0.014	-0.064	0.082	0.046	0.386	0.404	0.168*
		86.1	-0.044*	0.172*	-0.014	0.036	0.082	0.046	0.286	0.304	0.168*
		86.2	-0.044*	0.172*	0.086	0.136	0.082	0.046	0.386	0.304	0.068*
		86.3	-0.044*	0.172*	0.086	0.136	0.082	0.146	0.486	0.304	0.068*
		86.4	-0.044*	0.172*	0.086	0.136	0.082	0.146	0.486	0.304	0.068*
		86.5	-0.044*	0.172*	0.086	0.136	0.082	0.146	0.486	0.404	-0.032*
		86.6	-0.044*	0.172*	0.086	0.136	0.082	0.146	0.486	0.404	0.068*
		86.7	0.056*	0.372*	0.086	0.136	0.182	0.246	0.386	0.404	0.068*
		86.8	-0.144*	0.172*	0.086	0.136	0.082	0.146	0.386	0.404	0.168*
		86.9	-0.044*	0.172*	0.086	0.036	0.082	0.146	0.386	0.404	0.168*
		87	-0.044*	0.172*	-0.014	-0.064	0.082	0.146	0.386	0.404	0.168*
		87.1	-0.044*	0.172*	-0.014	-0.064	0.082	0.146	0.386	0.404	0.168*
		87.2	-0.044*	0.172*	-0.014	0.036	0.082	0.146	0.386	0.304	0.168*
		87.3	-0.044*	0.172*	-0.014	0.036	0.182	0.246	0.386	0.404	0.068*
		87.4	-0.044*	0.172*	0.186	0.136	0.082	0.146	0.286	0.304	0.068*
		87.5	-0.044*	0.172*	0.186	0.136	0.082	0.146	0.386	0.304	0.068*
		87.6	-0.044*	0.172*	0.186	0.136	0.082	0.146	0.486	0.404	0.068*
		87.7	-0.144*	-0.028*	0.086	0.136	0.082	0.146	0.386	0.404	-0.032*
		87.8	-0.244*	-0.028*	0.086	0.136	0.182	0.246	0.386	0.404	-0.032*
		87.9	-0.044*	0.072*	0.086	0.136	0.082	0.146	0.386	0.404	-0.032*
		88	-0.044*	0.072*	0.086	0.136	0.082	0.146	0.386	0.304	0.168*
		88.1	-0.044*	0.172*	0.086	0.236	0.082	0.146	0.386	0.304	0.168*
		88.2	-0.044*	0.172*	0.086	0.136	0.082	0.146	0.386	0.304	0.168*
		88.3	-0.044*	0.172*	0.186	0.136	0.082	0.246	0.286	0.204	0.168*
		88.4	-0.044*	0.072*	0.186	0.136	0.082	0.246	0.286	0.304	0.168*
		88.5	-0.044*	0.072*	0.186	0.136	0.082	0.246	0.386	0.404	0.168*
		88.6	-0.044*	0.072*	0.086	0.036	0.082	0.146	0.486	0.404	0.168*
		88.7	0.056*	0.172*	0.086	0.036	-0.018	0.046	0.486	0.404	0.068*
		88.8	-0.044*	0.072*	0.086	0.136	-0.018	0.046	0.386	0.404	0.068*
		88.9	-0.044*	0.072*	0.086	0.136	-0.018	0.046	0.386	0.304	0.068*
		89	-0.044*	0.072*	0.086	0.136	-0.018	0.046	0.386	0.304	0.068*
		89.1	0.056*	0.072*	0.086	0.136	-0.018	0.046	0.386	0.304	-0.032*
		89.2	-0.044*	0.172*	0.086	0.236	-0.018	0.146	0.386	0.304	0.068*
		89.3	-0.044*	0.172*	0.086	0.236	-0.018	0.246	0.386	0.304	0.068*
		89.4	-0.044*	0.172*	0.086	0.236	0.082	0.246	0.386	0.304	0.068*
		89.5	-0.044*	0.072*	0.186	0.136	0.082	0.246	0.386	0.304	0.068*
		89.6	-0.044*	0.072*	0.186	0.136	0.082	0.246	0.386	0.304	0.168*
		89.7	-0.144*	-0.028*	0.186	0.136	0.082	0.246	0.286	0.204	0.168*
		89.8	-0.044*	0.072*	0.186	0.136	-0.018	0.146	0.386	0.304	0.068*
		89.9	-0.044*	0.072*	0.186	0.136	-0.018	0.046	0.386	0.304	0.068*
		90	-0.044*	0.072*	-0.014	0.036	-0.018	0.046	0.386	0.304	0.068*
		90.1	-0.044*	0.072*	-0.014	0.036	-0.018	0.046	0.386	0.304	0.068*
		90.2	-0.044*	0.072*	0.086	0.136	-0.018	0.046	0.386	0.304	0.068*
		90.3	-0.044*	0.072*	0.086	0.236	-0.018	0.146	0.386	0.304	-0.032*
		90.4	0.056*	0.072*	0.086	0.236	0.082	0.246	0.286	0.304	0.068*
		90.5	0.056*	0.072*	0.086	0.236	0.182	0.246	0.286	0.304	0.168*
		90.6	-0.044*	0.072*	0.086	0.236	0.082	0.246	0.286	0.304	0.168*
		90.7	0.056*	0.172*	0.086	0.236	-0.018	0.146	0.286	0.204	0.168*
		90.8	-0.044*	0.172*	0.086	0.236	-0.018	0.146	0.286	0.104	0.168*
		90.9	-0.044*	0.172*	0.086	0.236	-0.018	0.146	0.286	0.104	0.168*
		91	-0.044*	0.172*	-0.014	0.136	-0.018	0.046	0.286	0.104	0.168*
		91.1	-0.044*	0.072*	-0.014	0.036	-0.018	0.046	0.286	0.104	0.068*
		91.2	-0.044*	0.072*	-0.014	0.036	-0.018	0.146	0.386	0.204	0.168*
		91.3	-0.044*	0.072*	-0.014	0.036	0.082	0.246	0.386	0.204	0.168*
		91.4	0.056*	0.072*	-0.014	0.036	0.082	0.246	0.386	0.204	0.068*
		91.5	0.056*	0.072*	-0.014	0.136	0.082	0.246	0.386	0.304	0.168*
		91.6	-0.044*	0.072*	-0.014	0.136	0.082	0.246	0.286	0.304	0.168*
		91.7	0.056*	0.172*	-0.014	0.136	0.082	0.246	0.386	0.304	0.168*
		91.8	-0.044*	0.072*	0.086	0.236	0.082	0.246	0.286	0.204	0.168*
		91.9	-0.044*	0.072*	0.086	0.236	-0.018	0.046	0.286	0.204	0.168*
		92	-0.044*	0.072*	0.086	0.236	-0.018	0.046	0.286	0.204	0.068*
		92.1	-0.044*	0.172*	0.086	0.236	-0.018	0.046	0.286	0.104	0.168*
		92.2	-0.044*	0.172*	-0.014	0.036	-0.018	0.046	0.286	0.104	0.168*
		92.3	0.056*	0.172*	-0.014	0.036	-0.018	0.046	0.286	0.104	0.268*
		92.4	0.056*	0.172*	0.086	0.036	-0.018	0.046	0.286	0.104	0.268*
		92.5	0.056*	0.172*	0.086	0.036	-0.018	0.046	0.186	0.104	0.268*
		92.6	0.056*	0.172*	-0.014	0.036	-0.018	0.146	0.186	0.204	0.268*
		92.7	0.056*	0.072*	-0.014	0.036	0.082	0.246	0.186	0.204	0.168*
		92.8	-0.044*	-0.028*	-0.014	0.136	0.082	0.246	0.186	0.204	0.168*
		92.9	-0.144*	-0.028*	-0.014	0.136	0.182	0.246	0.286	0.304	0.068*
		93	-0.144*	0.072*	-0.014	0.136	0.082	0.246	0.386	0.304	0.168*
		93.1	-0.044*	0.172*	-0.014	0.136	0.082	0.146	0.386	0.304	0.168*
		93.2	0.056*	0.172*	-0.014	0.136	0.082	0.146	0.386	0.204	0.168*
		93.3	0.056*	0.172*	-0.114	0.036	-0.018	0.046	0.386	0.204	0.168*
		93.4	0.056*	0.172*	-0.114	-0.064	-0.018	0.046	0.386	0.204	0.168*
		93.5	0.056*	0.172*	-0.014	0.036	-0.018	0.046	0.386	0.204	0.268*
		93.6	0.056*	0.172*	-0.014	0.036	0.082	0.146	0.386	0.204	0.268*
		93.7	0.056*	0.172*	-0.014	0.136	0.082	0.146	0.386	0.204	0.268*
		93.8	0.056*	0.172*	-0.114	0.136	0.082	0.146	0.386	0.204	0.168*
		93.9	-0.044*	0.072*	-0.114	0.136	0.082	0.146	0.286	0.104	0.168*
		94	-0.044*	0.072*	-0.114	0.136	0.082	0.146	0.286	0.104	0.168*
		94.1	-0.044*	0.072*	-0.114	0.136	0.082	0.146	0.186	0.204	0.168*
		94.2	-0.044*	0.072*	-0.114	0.136	0.082	0.046	0.186	0.204	0.068*
		94.3	-0.044*	0.072*	-0.014	0.136	-0.018	-0.054	0.186	0.204	0.068*
		94.4	-0.044*	0.172*	-0.014	0.136	-0.118	0.046	0.186	0.204	0.068*
		94.5	-0.044*	0.172*	-0.114	0.036	-0.018	0.046	0.286	0.204	0.168*
		94.6	0.056*	0.172*	-0.114	-0.064	-0.018	0.046	0.286	0.204	0.268*
		94.7	0.056*	0.172*	-0.114	-0.064	-0.018	0.046	0.286	0.204	0.268*
		94.8	0.056*	0.172*	-0.014	0.136	-0.018	0.046	0.286	0.104	0.268*
		94.9	0.056*	0.172*	-0.014	0.136	-0.018	0.046	0.286	0.104	0.268*
		95	0.056*	0.172*	-0.014	0.136	0.082	0.146	0.286	0.104	0.168*
		95.1	-0.044*	0.072*	-0.014	0.136	0.082	0.146	0.286	0.104	0.168*
		95.2	-0.044*	0.072*	-0.014	0.136	0.082	0.146	0.286	0.104	0.168*
		95.3	-0.044*	0.072*	-0.014	0.136	0.082	0.146	0.286	0.104	0.068*
		95.4	-0.044*	0.172*	-0.214	0.036	-0.018	0.046	0.286	0.104	0.168*
		95.5	-0.044*	0.172*	-0.214	0.036	-0.018	0.046	0.186	0.204	0.168*
		95.6	0.056*	0.172*	-0.214	0.036	-0.018	0.046	0.186	0.204	0.168*
		95.7	0.056*	0.172*	-0.114	0.036	-0.118	0.046	0.286	0.204	0.168*
		95.8	0.056*	0.172*	-0.114	0.036	-0.118	0.046	0.286	0.204	0.168*
		95.9	0.056*	0.172*	-0.114	0.036	-0.018	-0.054	0.286	0.204	0.168*
		96	0.056*	0.072*	-0.114	0.136	-0.018	0.046	0.286	0.104	0.168*
		96.1	-0.044*	0.072*	-0.114	0.036	-0.018	0.046	0.286	0.104	0.168*
		96.2	-0.044*	0.072*	-0.114	0.036	-0.018	0.046	0.286	0.104	0.168*
		96.3	-0.044*	0.072*	-0.114	0.036	-0.018	0.046	0.286	0.104	0.168*
		96.4	-0.044*	0.072*	-0.214	-0.064	-0.118	-0.054	0.386	0.204	0.168*
		96.5	-0.044*	0.072*	-0.214	-0.064	-0.118	-0.054	0.286	0.204	0.168*
		96.6	-0.044*	0.172*	-0.014	0.036	-0.118	-0.054	0.186	0.204	0.168*
		96.7	-0.044*	0.172*	-0.014	0.036	-0.018	0.046	0.186	0.204	0.268*
		96.8	-0.044*	0.172*	-0.014	0.036	-0.018	0.046	0.186	0.204	0.168*
		96.9	-0.044*	0.172*	-0.014	0.036	-0.018	0.046	0.186	0.204	0.068*
		97	-0.044*	0.172*	-0.014	0.036	-0.018	0.046	0.186	0.204	0.068*
		97.1	-0.044*	0.172*	-0.014	0.036	-0.018	0.046	0.286	0.204	0.068*
		97.2	0.056*	0.172*	-0.014	0.036	-0.018	0.046	0.286	0.204	0.068*
		97.3	0.056*	0.172*	-0.114	0.036	0.082	0.046	0.286	0.204	0.168*
		97.4	0.056*	0.172*	-0.114	0.036	-0.018	0.046	0.286	0.204	0.168*
		97.5	0.056*	0.172*	-0.114	0.036	-0.018	0.146	0.186	0.104	0.168*
		97.6	-0.044*	0.072*	-0.214	0.036	-0.018	0.146	0.186	0.104	0.168*
		97.7	-0.044*	0.072*	-0.214	0.036	-0.018	0.146	0.186	0.104	0.268*
		97.8	-0.144*	0.072*	-0.114	0.036	-0.018	0.146	0.186	0.104	0.268*
		97.9	-0.144*	0.172*	-0.114	0.036	-0.118	0.046	0.086	0.104	0.268*
		98	-0.144*	0.172*	-0.114	-0.064	-0.118	0.046	0.086	0.104	0.268*
		98.1	-0.044*	0.172*	-0.114	-0.064	-0.118	0.046	0.086	0.104	0.268*
		98.2	-0.044*	0.172*	-0.014	0.036	-0.018	0.146	0.086	0.104	0.168*
		98.3	-0.044*	0.172*	-0.014	0.036	-0.018	0.046	0.186	0.104	0.168*
		98.4	-0.044*	0.172*	-0.114	-0.064	-0.018	0.046	0.186	0.104	0.168*
		98.5	-0.044*	0.172*	-0.014	-0.064	0.082	0.046	0.186	0.104	0.168*
		98.6	-0.044*	0.172*	-0.114	-0.064	0.082	0.046	0.186	0.104	0.068*
		98.7	-0.044*	0.172*	-0.114	-0.064	0.082	0.146	0.186	0.104	0.068*
		98.8	-0.144*	0.072*	-0.114	-0.064	0.082	0.146	0.186	0.104	0.068*
		98.9	-0.044*	0.172*	-0.114	-0.064	0.082	0.146	0.186	0.104	0.068*
		99	-0.044*	0.172*	-0.114	0.036	0.082	0.146	0.186	0.104	0.168*
		99.1	-0.044*	0.172*	-0.114	0.036	0.082	0.146	0.186	0.104	0.168*
		99.2	-0.144*	0.172*	-0.114	0.036	-0.018	0.046	0.186	0.204	0.268*
		99.3	-0.044*	0.272*	-0.114	0.036	-0.018	0.046	0.186	0.204	0.168*
		99.4	-0.044*	0.272*	-0.114	0.036	-0.018	0.046	0.186	0.204	0.168*
		99.5	-0.044*	0.272*	-0.114	0.036	-0.018	0.046	0.186	0.204	0.168*
		99.6	-0.044*	0.272*	-0.014	0.036	0.082	0.046	0.086	0.204	0.168*
		99.7	-0.044*	0.272*	-0.014	0.036	0.082	0.046	0.086	0.204	0.168*
		99.8	-0.044*	0.272*	-0.014	0.036	0.082	0.046	0.086	0.204	0.168*
		99.9	-0.044*	0.272*	-0.014	0.036	0.082	0.046	0.086	0.204	0.168*
		100	0.056*	0.272*	0.086	0.136	-0.018	0.046	0.086	0.204	0.168*
		100.1	0.056*	0.372*	0.086	0.136	-0.018	0.046	0.086	0.004	0.168*
		100.2	-0.044*	0.272*	0.086	0.136	-0.018	0.046	0.086	0.004	0.168*
		100.3	-0.044*	0.272*	-0.014	0.036	-0.018	0.046	0.186	0.104	0.168*
		100.4	-0.044*	0.272*	-0.014	0.036	-0.018	0.046	0.186	0.204	0.168*
		100.5	-0.044*	0.172*	-0.014	0.036	-0.018	0.046	0.186	0.204	0.068*
		100.6	-0.044*	0.172*	-0.014	0.136	-0.018	0.046	0.186	0.204	0.168*
		100.7	-0.044*	0.172*	-0.014	0.136	-0.018	0.046	0.186	0.204	0.168*
		100.8	-0.044*	0.172*	-0.014	0.136	-0.018	0.046	0.186	0.204	0.168*
		100.9	-0.044*	0.172*	-0.014	0.136	-0.018	0.046	0.186	0.204	0.068*
		101	-0.044*	0.172*	-0.014	0.136	-0.018	0.046	0.186	0.204	0.068*
		101.1	0.056*	0.272*	-0.014	0.036	-0.018	0.046	0.186	0.204	0.168*
		101.2	0.056*	0.372*	-0.014	0.036	0.082	0.046	0.086	0.104	0.168*
		101.3	-0.044*	0.372*	-0.014	0.036	0.082	0.046	0.086	0.104	0.168*
		101.4	-0.144*	0.272*	-0.014	0.036	-0.018	0.046	0.086	0.104	0.168*
		101.5	-0.144*	0.272*	-0.014	0.036	-0.018	0.046	0.086	0.104	0.168*
		101.6	-0.044*	0.272*	-0.014	0.036	-0.018	0.046	0.086	0.004	0.168*
		101.7	-0.044*	0.272*	-0.014	0.036	-0.118	-0.054	0.086	0.104	0.168*
		101.8	-0.044*	0.272*	-0.014	-0.064	-0.118	-0.054	0.186	0.204	0.168*
		101.9	-0.044*	0.272*	-0.014	-0.064	-0.118	-0.054	0.286	0.204	0.268*
		102	-0.044*	0.272*	-0.014	-0.064	-0.118	-0.054	0.286	0.204	0.268*
		102.1	-0.044*	0.272*	-0.014	-0.064	-0.118	-0.054	0.286	0.204	0.268*
		102.2	-0.044*	0.272*	0.086	0.036	-0.118	-0.054	0.286	0.204	0.168*
		102.3	-0.044*	0.272*	-0.014	0.136	-0.118	-0.054	0.286	0.204	0.068*
		102.4	-0.044*	0.272*	-0.014	0.136	-0.018	-0.054	0.286	0.204	0.068*
		102.5	-0.044*	0.272*	-0.014	0.136	-0.018	-0.054	0.286	0.204	0.068*
		102.6	-0.044*	0.372*	-0.014	0.136	0.082	0.046	0.286	0.204	0.168*
		102.7	-0.044*	0.372*	-0.014	0.136	0.082	0.046	0.286	0.204	0.168*
		102.8	-0.044*	0.372*	-0.014	0.136	0.082	0.046	0.186	0.304	0.168*
		102.9	-0.044*	0.472*	-0.014	0.136	0.082	0.046	0.186	0.304	0.168*
		103	-0.044*	0.372*	-0.014	0.136	0.082	0.046	0.086	0.204	0.168*
		103.1	-0.044*	0.372*	-0.014	0.136	0.082	0.046	0.086	0.104	0.168*
		103.2	-0.044*	0.372*	-0.014	0.136	0.082	0.046	0.086	0.104	0.168*
		103.3	-0.144*	0.272*	-0.114	0.036	0.082	0.046	0.086	0.104	0.268*
		103.4	-0.144*	0.272*	-0.014	0.036	0.082	0.046	0.286	0.204	0.268*
		103.5	-0.144*	0.272*	0.086	0.136	0.082	0.046	0.286	0.204	0.268*
		103.6	-0.044*	0.272*	0.086	0.136	0.082	0.046	0.286	0.204	0.268*
		103.7	-0.044*	0.272*	0.086	0.236	0.082	0.046	0.286	0.204	0.268*
		103.8	-0.044*	0.272*	0.086	0.236	0.082	0.046	0.286	0.204	0.268*
		103.9	-0.044*	0.372*	0.086	0.236	-0.118	-0.054	0.286	0.204	0.168*
		104	-0.044*	0.372*	0.086	0.236	-0.118	-0.054	0.286	0.204	0.168*
		104.1	-0.044*	0.372*	0.086	0.236	-0.118	-0.054	0.286	0.204	0.168*
		104.2	-0.044*	0.372*	0.086	0.236	-0.118	-0.054	0.286	0.204	0.168*
		104.3	-0.044*	0.372*	0.086	0.236	-0.118	-0.054	0.186	0.204	0.168*
		104.4	-0.044*	0.372*	0.086	0.136	-0.118	-0.054	0.086	0.204	0.068*
		104.5	-0.044*	0.372*	-0.014	0.136	-0.018	-0.054	0.086	0.104	0.068*
		104.6	-0.044*	0.372*	-0.114	0.036	-0.018	-0.054	0.086	0.104	0.168*
		104.7	-0.044*	0.372*	-0.114	0.036	-0.018	-0.054	0.086	0.104	0.168*
		104.8	-0.044*	0.372*	-0.014	0.036	-0.018	-0.154	0.086	0.104	0.268*
		104.9	-0.044*	0.372*	-0.014	0.036	-0.018	-0.154	0.086	0.104	0.268*
		105	-0.144*	0.272*	-0.014	0.036	-0.018	-0.054	0.186	0.104	0.268*
		105.1	-0.144*	0.272*	-0.014	0.036	0.082	0.046	0.186	0.104	0.268*
		105.2	-0.044*	0.272*	0.086	0.136	0.082	0.046	0.286	0.204	0.168*
		105.3	-0.044*	0.372*	0.086	0.136	-0.018	0.046	0.286	0.204	0.168*
		105.4	-0.044*	0.372*	0.086	0.136	-0.018	0.046	0.286	0.204	0.168*
		105.5	-0.144*	0.372*	0.086	0.136	-0.018	0.046	0.286	0.204	0.168*
		105.6	-0.144*	0.372*	0.086	0.236	-0.018	0.046	0.286	0.204	0.168*
		105.7	-0.144*	0.372*	-0.014	0.136	-0.018	0.046	0.286	0.304	0.168*
		105.8	-0.144*	0.272*	-0.014	0.136	-0.018	0.046	0.286	0.304	0.168*
		105.9	-0.144*	0.272*	-0.014	0.136	-0.018	0.046	0.086	0.204	0.168*
		106	-0.144*	0.272*	-0.014	0.136	-0.018	0.046	0.086	0.204	0.168*
		106.1	-0.144*	0.272*	-0.014	0.136	-0.018	0.146	0.086	0.104	0.168*
		106.2	-0.144*	0.272*	-0.014	0.136	0.082	0.146	0.086	0.104	0.168*
		106.3	-0.144*	0.272*	-0.014	0.136	0.082	0.146	0.186	0.104	0.268*
		106.4	-0.044*	0.372*	-0.014	0.136	0.082	0.046	0.186	0.104	0.268*
		106.5	-0.044*	0.372*	0.186	0.236	0.082	0.046	0.186	0.104	0.268*
		106.6	-0.044*	0.372*	0.186	0.236	-0.018	-0.054	0.186	0.104	0.268*
		106.7	0.056*	0.372*	0.186	0.236	-0.018	-0.054	0.186	0.104	0.268*
		106.8	-0.044*	0.372*	0.186	0.136	-0.018	-0.054	0.186	0.104	0.268*
		106.9	-0.044*	0.372*	0.186	0.136	-0.018	-0.054	0.186	0.104	0.268*
		107	-0.044*	0.372*	0.186	0.136	-0.018	-0.054	0.186	0.104	0.268*
		107.1	-0.044*	0.372*	0.186	0.136	-0.018	-0.054	0.186	0.104	0.268*
		107.2	-0.044*	0.372*	0.186	0.136	0.082	0.146	0.186	0.104	0.168*
		107.3	-0.044*	0.372*	0.186	0.136	0.082	0.146	0.186	0.104	0.168*
		107.4	-0.044*	0.372*	0.086	0.136	0.082	0.146	0.186	0.204	0.168*
		107.5	-0.044*	0.372*	-0.014	0.136	0.082	0.146	0.186	0.204	0.168*
		107.6	-0.044*	0.272*	-0.014	0.136	0.082	0.146	0.086	0.204	0.168*
		107.7	0.056*	0.272*	-0.014	0.136	0.082	0.146	0.086	0.204	0.268*
		107.8	0.056*	0.272*	-0.014	0.136	-0.018	0.146	0.086	0.204	0.368*
		107.9	-0.044*	0.272*	-0.014	0.136	0.082	0.146	0.186	0.204	0.368*
		108	-0.044*	0.272*	-0.014	0.136	0.082	0.146	0.186	0.204	0.368*
		108.1	-0.044*	0.272*	-0.014	0.136	0.082	0.146	0.186	0.204	0.368*
		108.2	-0.044*	0.272*	-0.014	0.136	-0.018	-0.054	0.186	0.204	0.268*
		108.3	-0.044*	0.372*	-0.014	0.136	-0.018	-0.054	0.186	0.104	0.268*
		108.4	-0.044*	0.372*	0.086	0.136	-0.018	-0.054	0.186	0.104	0.268*
		108.5	-0.144*	0.272*	0.086	0.136	-0.018	0.046	0.186	0.104	0.268*
		108.6	-0.144*	0.272*	0.086	0.036	-0.018	0.046	0.186	0.104	0.268*
		108.7	-0.144*	0.272*	0.086	0.036	-0.018	0.046	0.186	0.104	0.268*
		108.8	-0.144*	0.272*	0.186	0.136	-0.018	0.046	0.186	0.104	0.268*
		108.9	-0.044*	0.272*	0.186	0.136	-0.018	0.046	0.186	0.104	0.268*
		109	-0.044*	0.272*	0.186	0.136	-0.018	0.046	0.186	0.204	0.268*
		109.1	-0.044*	0.272*	0.186	0.136	-0.018	0.046	0.186	0.204	0.268*
		109.2	-0.144*	0.272*	0.086	0.036	-0.018	0.046	0.086	0.204	0.268*
		109.3	-0.044*	0.372*	0.086	0.036	-0.018	0.046	-0.014	0.104	0.268*
		109.4	-0.044*	0.272*	0.086	0.036	-0.018	0.046	0.086	0.104	0.268*
		109.5	-0.044*	0.272*	0.086	0.036	0.082	0.046	0.086	0.104	0.268*
		109.6	-0.044*	0.272*	0.086	0.036	0.082	0.046	0.086	0.104	0.368*
		109.7	-0.044*	0.272*	-0.014	0.036	0.082	0.046	0.086	0.104	0.368*
		109.8	-0.044*	0.272*	-0.014	0.136	-0.018	0.046	0.086	0.104	0.368*
		109.9	-0.044*	0.272*	-0.014	0.136	-0.018	0.146	0.086	0.104	0.268*
		110	-0.144*	0.172*	-0.014	0.136	-0.018	0.146	0.086	0.104	0.268*
		110.1	-0.144*	0.172*	0.086	0.136	-0.018	0.146	0.086	0.104	0.268*
		110.2	-0.144*	0.172*	0.086	0.136	-0.018	0.146	0.086	0.104	0.268*
		110.3	-0.044*	0.172*	0.086	0.136	-0.018	0.146	0.186	0.204	0.268*
		110.4	-0.044*	0.172*	0.086	0.136	-0.018	0.146	0.186	0.204	0.268*
		110.5	-0.044*	0.172*	0.086	0.136	0.082	0.246	0.186	0.204	0.268*
		110.6	-0.044*	0.272*	0.086	0.136	-0.018	0.146	0.186	0.204	0.268*
		110.7	-0.044*	0.272*	0.086	0.036	-0.018	0.046	0.286	0.204	0.268*
		110.8	-0.044*	0.272*	-0.014	-0.064	-0.018	0.046	0.286	0.204	0.268*
		110.9	-0.144*	0.272*	-0.014	-0.064	-0.018	0.046	0.286	0.204	0.268*
		111	-0.144*	0.272*	-0.014	-0.064	-0.018	0.046	0.286	0.204	0.268*
		111.1	-0.144*	0.272*	-0.014	-0.064	-0.018	0.046	0.186	0.204	0.168*
		111.2	-0.144*	0.272*	0.086	0.036	0.082	0.046	0.186	0.204	0.168*
		111.3	-0.144*	0.272*	0.086	0.036	0.082	0.046	0.186	0.204	0.268*
		111.4	-0.144*	0.272*	0.086	0.136	0.082	0.046	0.186	0.204	0.268*
		111.5	-0.144*	0.272*	0.086	0.136	0.082	0.046	0.186	0.204	0.268*
		111.6	0.056*	0.372*	0.086	0.136	0.082	0.146	0.186	0.204	0.268*
		111.7	0.056*	0.372*	0.086	0.136	0.082	0.146	0.186	0.204	0.168*
		111.8	-0.044*	0.272*	0.086	0.136	-0.018	0.146	0.186	0.204	0.168*
		111.9	-0.044*	0.172*	0.086	0.136	-0.018	0.146	0.186	0.204	0.168*
		112	-0.044*	0.172*	0.086	0.036	-0.018	0.146	0.186	0.304	0.168*
		112.1	-0.044*	0.172*	0.086	0.036	-0.018	0.146	0.186	0.304	0.268*
		112.2	-0.044*	0.172*	0.086	0.036	-0.018	0.146	0.186	0.304	0.268*
		112.3	-0.144*	0.172*	-0.014	-0.064	-0.018	0.146	0.386	0.404	0.268*
		112.4	-0.144*	0.172*	-0.014	-0.064	-0.018	0.146	0.286	0.304	0.168*
		112.5	-0.144*	0.272*	-0.014	-0.064	-0.118	0.046	0.286	0.304	0.168*
		112.6	-0.144*	0.272*	-0.014	0.036	-0.018	0.146	0.286	0.304	0.168*
		112.7	-0.144*	0.272*	-0.014	0.036	-0.018	0.146	0.286	0.304	0.168*
		112.8	-0.144*	0.272*	-0.014	0.036	-0.018	0.046	0.286	0.304	0.168*
		112.9	-0.144*	0.272*	-0.014	0.036	-0.018	0.046	0.286	0.304	0.168*
		113	-0.144*	0.272*	-0.014	0.036	-0.018	0.046	0.286	0.304	0.168*
		113.1	-0.044*	0.272*	-0.014	0.036	-0.018	0.146	0.186	0.304	0.168*
		113.2	-0.044*	0.272*	-0.014	0.036	0.082	0.146	0.186	0.304	0.268*
		113.3	-0.044*	0.272*	-0.014	0.036	0.082	0.146	0.186	0.304	0.268*
		113.4	-0.044*	0.272*	-0.014	0.036	0.082	0.146	0.186	0.304	0.268*
		113.5	-0.044*	0.272*	-0.014	0.036	0.082	0.146	0.186	0.304	0.268*
		113.6	-0.144*	0.172*	0.086	0.136	0.082	0.146	0.186	0.304	0.168*
		113.7	-0.144*	0.172*	0.086	0.136	0.082	0.146	0.286	0.304	0.168*
		113.8	-0.144*	0.172*	0.186	0.136	0.082	0.146	0.286	0.304	0.168*
		113.9	-0.144*	0.272*	0.186	0.136	0.082	0.146	0.286	0.304	0.068*
		114	-0.144*	0.272*	0.186	0.136	-0.018	0.046	0.286	0.304	0.168*
		114.1	-0.144*	0.272*	0.186	0.136	-0.018	0.046	0.286	0.304	0.168*
		114.2	-0.144*	0.272*	0.086	0.036	-0.018	0.046	0.286	0.304	0.168*
		114.3	-0.044*	0.372*	0.086	0.036	0.082	0.146	0.186	0.204	0.168*
		114.4	-0.044*	0.272*	-0.014	0.036	0.082	0.246	0.186	0.204	0.268*
		114.5	-0.044*	0.272*	-0.014	0.036	0.082	0.246	0.186	0.204	0.268*
		114.6	-0.044*	0.272*	-0.014	0.036	0.082	0.246	0.186	0.204	0.268*
		114.7	-0.144*	0.272*	-0.014	0.036	0.082	0.246	0.186	0.204	0.168*
		114.8	-0.044*	0.272*	-0.014	0.036	-0.018	0.246	0.186	0.304	0.168*
		114.9	-0.044*	0.272*	-0.014	0.036	-0.018	0.246	0.286	0.404	0.168*
		115	-0.044*	0.272*	-0.014	0.036	-0.018	0.246	0.286	0.404	0.168*
		115.1	-0.044*	0.272*	-0.014	0.036	0.082	0.246	0.286	0.404	0.168*
		115.2	-0.044*	0.272*	-0.014	0.036	-0.018	0.046	0.286	0.404	0.168*
		115.3	-0.044*	0.272*	-0.014	0.136	-0.018	0.046	0.286	0.404	0.168*
		115.4	-0.144*	0.172*	-0.014	0.136	-0.018	0.046	0.286	0.304	0.168*
		115.5	-0.144*	0.272*	0.086	0.136	-0.018	0.046	0.286	0.204	0.168*
		115.6	-0.144*	0.272*	0.086	0.136	-0.018	0.046	0.186	0.204	0.168*
		115.7	-0.144*	0.272*	0.086	0.036	-0.018	0.046	0.186	0.204	0.268*
		115.8	-0.144*	0.272*	0.086	0.036	0.082	0.146	0.186	0.204	0.268*
		115.9	-0.144*	0.172*	0.086	0.036	0.082	0.146	0.186	0.204	0.268*
		116	-0.144*	0.172*	0.086	0.036	0.082	0.246	0.186	0.204	0.268*
		116.1	-0.144*	0.172*	0.086	0.036	0.082	0.246	0.186	0.204	0.168*
		116.2	-0.144*	0.172*	0.086	0.036	-0.018	0.146	0.186	0.204	0.168*
		116.3	-0.044*	0.272*	0.086	0.036	-0.018	0.146	0.186	0.304	0.168*
		116.4	-0.044*	0.272*	-0.014	0.036	-0.018	0.146	0.286	0.404	0.068*
		116.5	0.056*	0.272*	-0.014	0.136	-0.018	0.146	0.286	0.404	0.068*
		116.6	0.056*	0.272*	-0.014	0.136	0.082	0.146	0.286	0.404	0.168*
		116.7	-0.044*	0.372*	-0.014	0.136	-0.018	0.146	0.286	0.404	0.168*
		116.8	-0.044*	0.372*	-0.014	0.136	-0.018	0.146	0.186	0.304	0.168*
		116.9	-0.044*	0.372*	0.086	0.136	-0.018	0.146	0.186	0.304	0.168*
		117	-0.044*	0.372*	0.086	0.136	-0.018	0.046	0.186	0.304	0.168*
		117.1	-0.044*	0.372*	0.086	0.136	-0.018	0.046	0.186	0.304	0.168*
		117.2	-0.144*	0.272*	0.086	0.136	-0.018	0.046	0.286	0.304	0.268*
		117.3	-0.144*	0.272*	0.086	0.136	-0.018	0.046	0.286	0.304	0.268*
		117.4	-0.144*	0.272*	0.086	0.136	-0.018	0.146	0.286	0.304	0.268*
		117.5	-0.144*	0.272*	0.086	0.136	-0.018	0.146	0.286	0.304	0.168*
		117.6	-0.144*	0.272*	0.086	0.136	-0.018	0.146	0.286	0.304	0.168*
		117.7	-0.144*	0.172*	0.086	0.036	-0.018	0.146	0.286	0.304	0.168*
		117.8	-0.144*	0.172*	0.086	0.036	-0.118	0.046	0.286	0.204	0.068*
		117.9	-0.144*	0.172*	0.086	0.036	-0.118	0.046	0.286	0.204	0.068*
		118	-0.144*	0.172*	0.086	0.036	-0.018	0.146	0.286	0.304	0.068*
		118.1	-0.144*	0.172*	0.086	0.036	-0.018	0.146	0.286	0.304	0.068*
		118.2	-0.144*	0.172*	-0.014	-0.064	-0.018	0.146	0.186	0.304	0.068*
		118.3	-0.144*	0.172*	0.086	0.036	-0.018	0.146	0.086	0.204	0.068*
		118.4	-0.144*	0.172*	0.186	0.036	0.082	0.146	0.086	0.204	0.068*
		118.5	-0.044*	0.172*	0.186	0.136	0.082	0.146	0.086	0.204	0.168*
		118.6	-0.144*	0.172*	0.186	0.136	0.082	0.046	0.086	0.204	0.168*
		118.7	-0.044*	0.272*	0.186	0.136	0.082	0.046	0.086	0.204	0.168*
		118.8	-0.044*	0.272*	0.086	0.136	-0.018	0.046	0.086	0.204	0.168*
		118.9	-0.044*	0.272*	0.086	0.136	-0.018	0.046	0.086	0.204	0.168*
		119	-0.044*	0.272*	0.086	0.136	-0.018	0.046	0.186	0.204	0.168*
		119.1	-0.144*	0.272*	0.086	0.136	-0.018	0.046	0.186	0.204	0.168*
		119.2	-0.144*	0.272*	0.086	0.136	-0.018	0.046	0.286	0.304	0.168*
		119.3	-0.144*	0.272*	0.086	0.136	-0.018	0.046	0.286	0.304	0.168*
		119.4	-0.144*	0.272*	0.086	0.136	-0.018	0.046	0.286	0.304	0.168*
		119.5	-0.144*	0.272*	0.086	0.136	-0.118	-0.054	0.286	0.304	0.068*
		119.6	-0.144*	0.272*	0.086	0.136	-0.118	-0.054	0.286	0.304	0.068*
		119.7	-0.144*	0.272*	-0.014	0.036	-0.118	-0.054	0.186	0.104	0.068*
		119.8	-0.144*	0.272*	-0.014	0.036	-0.018	-0.054	0.186	0.104	0.068*
		119.9	-0.144*	0.272*	-0.014	0.036	-0.018	-0.054	0.186	0.104	0.068*
		120	-0.144*	0.272*	-0.014	0.036	-0.018	-0.054	0.186	0.104	0.068*
		120.1	-0.144*	0.372*	-0.014	0.036	-0.018	-0.054	0.186	0.104	0.068*
		120.2	-0.044*	0.372*	-0.014	0.036	-0.018	-0.054	0.186	0.104	0.068*
		120.3	-0.044*	0.272*	-0.014	0.036	-0.018	-0.054	0.186	0.104	0.068*
		120.4	-0.044*	0.272*	-0.014	0.036	-0.018	-0.054	0.186	0.104	0.168*
		120.5	-0.144*	0.172*	0.086	0.036	-0.018	0.046	0.186	0.104	0.168*
		120.6	-0.144*	0.172*	0.086	0.036	-0.118	0.046	0.086	0.104	0.168*
		120.7	-0.144*	0.172*	0.086	0.036	-0.118	0.046	0.086	0.204	0.068*
		120.8	-0.144*	0.172*	-0.014	0.036	-0.118	-0.054	0.086	0.204	0.068*
		120.9	-0.144*	0.172*	-0.014	0.036	-0.118	-0.054	0.086	0.204	0.068*
		121	-0.144*	0.172*	0.086	0.136	-0.118	-0.054	0.086	0.104	0.068*
		121.1	-0.144*	0.172*	0.086	0.136	-0.118	-0.054	-0.014	0.004	0.068*
		121.2	-0.144*	0.172*	0.086	0.136	-0.018	-0.054	0.086	0.004	0.068*
		121.3	-0.144*	0.172*	0.086	0.136	-0.018	-0.054	0.086	0.004	0.068*
		121.4	-0.044*	0.272*	0.086	0.136	-0.018	-0.054	0.086	0.004	0.068*
		121.5	-0.044*	0.372*	0.086	0.136	-0.118	-0.154	0.086	0.004	0.068*
		121.6	-0.044*	0.372*	0.086	0.136	-0.018	-0.054	0.086	0.004	0.068*
		121.7	-0.044*	0.372*	0.086	0.136	-0.018	-0.054	0.086	0.004	0.068*
		121.8	-0.044*	0.372*	-0.014	0.036	-0.018	-0.054	0.086	0.004	0.068*
		121.9	-0.044*	0.372*	-0.014	0.036	-0.018	-0.054	0.086	0.004	0.068*
		122	-0.044*	0.372*	-0.014	0.036	-0.018	-0.054	0.086	0.004	0.168*
		122.1	-0.044*	0.372*	-0.014	0.036	-0.018	-0.054	-0.014	-0.096	0.068*
		122.2	-0.044*	0.372*	-0.014	0.036	-0.018	-0.054	0.086	0.004	0.168*
		122.3	0.056*	0.372*	-0.014	0.036	-0.018	-0.054	0.086	0.004	0.168*
		122.4	0.056*	0.272*	0.086	0.036	-0.118	-0.054	0.086	0.004	0.168*
		122.5	0.056*	0.272*	0.086	0.036	-0.118	-0.054	0.086	0.004	0.168*
		122.6	0.056*	0.272*	0.086	0.036	-0.118	0.046	0.186	0.004	0.168*
		122.7	-0.044*	0.172*	-0.014	0.136	-0.118	0.046	0.186	0.004	0.168*
		122.8	-0.044*	0.172*	-0.014	0.136	-0.118	0.046	0.186	0.004	0.168*
		122.9	-0.044*	0.172*	-0.014	0.036	-0.118	0.046	0.186	0.004	0.168*
		123	-0.044*	0.172*	0.086	0.136	-0.018	0.046	0.186	0.004	0.168*
		123.1	-0.044*	0.172*	0.086	0.136	-0.018	-0.054	0.186	0.004	0.168*
		123.2	-0.144*	0.172*	0.086	0.136	-0.118	-0.154	0.086	-0.096	0.168*
		123.3	-0.144*	0.172*	-0.014	0.036	-0.118	-0.154	0.086	-0.096	0.068*
		123.4	-0.144*	0.172*	-0.014	0.036	-0.118	-0.154	0.086	0.004	0.068*
		123.5	-0.144*	0.172*	-0.014	0.036	-0.118	-0.154	0.086	0.004	0.068*
		123.6	-0.044*	0.372*	-0.014	0.036	-0.118	-0.154	0.086	0.004	-0.032*
		123.7	-0.044*	0.372*	-0.014	0.036	-0.118	-0.154	0.086	0.004	-0.032*
		123.8	-0.044*	0.372*	-0.014	0.036	-0.118	-0.154	-0.014	-0.096	-0.032*
		123.9	-0.044*	0.372*	-0.014	0.036	-0.118	-0.154	-0.014	-0.096	0.068*
		124	-0.044*	0.372*	-0.014	0.036	-0.118	-0.154	-0.014	-0.096	0.068*
		124.1	-0.044*	0.372*	-0.014	0.036	-0.118	-0.154	-0.014	-0.096	0.168*
		124.2	-0.044*	0.372*	0.086	0.136	-0.118	-0.154	-0.014	-0.096	0.168*
		124.3	-0.044*	0.372*	0.186	0.136	0.082	0.046	-0.014	-0.096	0.168*
		124.4	-0.044*	0.372*	0.186	0.136	0.082	0.046	-0.014	-0.096	0.168*
		124.5	-0.044*	0.372*	0.186	0.136	0.082	0.046	-0.014	-0.096	0.168*
		124.6	-0.144*	0.172*	0.186	0.136	0.082	0.046	-0.014	0.004	0.168*
		124.7	-0.044*	0.172*	0.186	0.136	-0.018	-0.054	0.086	0.004	0.168*
		124.8	-0.044*	0.172*	0.186	0.136	-0.018	-0.054	0.186	0.104	0.168*
		124.9	-0.044*	0.172*	0.086	0.036	-0.018	-0.054	0.186	0.104	0.068*
		125	-0.044*	0.172*	0.086	0.036	-0.118	-0.054	0.086	0.104	0.068*
		125.1	-0.044*	0.172*	-0.014	0.136	-0.118	-0.054	0.086	0.004	0.068*
		125.2	-0.044*	0.172*	-0.014	0.136	-0.118	-0.054	0.086	0.004	0.068*
		125.3	-0.044*	0.172*	-0.014	0.136	-0.118	-0.054	0.086	0.004	0.068*
		125.4	-0.044*	0.172*	-0.014	0.136	-0.118	-0.054	0.086	0.004	0.068*
		125.5	-0.044*	0.172*	-0.014	0.136	-0.118	-0.054	0.086	0.004	0.068*
		125.6	-0.044*	0.172*	0.086	0.236	-0.118	0.046	0.086	0.004	0.068*
		125.7	-0.044*	0.172*	0.086	0.236	-0.118	0.046	0.086	0.004	0.068*
		125.8	-0.044*	0.272*	0.086	0.236	-0.118	-0.054	0.086	0.004	0.068*
		125.9	-0.044*	0.272*	0.086	0.236	-0.118	-0.054	-0.014	-0.096	0.068*
		126	-0.144*	0.172*	0.186	0.236	-0.118	-0.054	-0.014	0.004	-0.032*
		126.1	-0.144*	0.172*	0.186	0.136	-0.118	-0.054	-0.014	0.004	-0.032*
		126.2	-0.044*	0.272*	0.186	0.136	-0.218	-0.154	-0.014	0.004	-0.032*
		126.3	-0.044*	0.272*	0.186	0.136	-0.218	-0.154	-0.014	0.004	-0.032*
		126.4	-0.044*	0.272*	0.086	0.036	-0.118	-0.054	-0.014	0.004	-0.032*
		126.5	-0.044*	0.272*	0.086	0.036	-0.118	-0.054	-0.114	0.004	-0.032*
		126.6	-0.144*	0.272*	0.086	0.036	-0.018	-0.054	-0.114	0.004	0.068*
		126.7	-0.144*	0.272*	0.086	0.036	-0.018	-0.054	-0.114	0.004	0.068*
		126.8	-0.144*	0.272*	0.086	0.036	-0.018	-0.054	-0.114	0.004	0.068*
		126.9	-0.044*	0.272*	0.086	0.136	-0.018	0.046	-0.014	0.004	0.068*
		127	-0.144*	0.172*	-0.014	0.136	-0.018	0.046	-0.014	0.004	0.168*
		127.1	-0.144*	0.172*	-0.014	0.136	-0.118	0.046	-0.014	0.004	0.068*
		127.2	-0.144*	0.072*	0.086	0.136	-0.118	0.046	-0.014	0.104	0.068*
		127.3	-0.144*	0.072*	0.086	0.136	-0.118	0.046	-0.014	0.104	0.068*
		127.4	-0.144*	0.072*	0.086	0.136	-0.118	0.046	-0.014	0.104	0.068*
		127.5	-0.144*	0.072*	0.086	0.136	-0.118	0.046	-0.014	0.004	0.068*
		127.6	-0.144*	0.072*	0.086	0.136	-0.118	0.046	0.086	0.104	-0.032*
		127.7	-0.044*	0.172*	-0.014	0.036	-0.218	-0.054	0.086	0.104	-0.032*
		127.8	-0.044*	0.172*	-0.014	0.036	-0.018	0.046	0.086	0.104	-0.032*
		127.9	-0.044*	0.172*	-0.014	0.036	-0.018	0.046	0.086	0.104	-0.032*
		128	-0.044*	0.172*	-0.014	0.036	-0.018	0.046	0.086	0.104	-0.032*
		128.1	-0.144*	0.072*	-0.014	0.036	-0.018	-0.054	-0.014	0.004	-0.032*
		128.2	-0.044*	0.172*	-0.014	0.036	-0.018	-0.054	-0.014	0.004	-0.032*
		128.3	-0.044*	0.172*	-0.014	0.036	-0.018	-0.054	-0.014	0.004	-0.032*
		128.4	-0.044*	0.172*	-0.014	-0.064	-0.018	-0.054	-0.114	0.004	-0.032*
		128.5	-0.044*	0.172*	-0.014	0.036	-0.018	0.046	-0.114	0.004	-0.032*
		128.6	-0.044*	0.172*	-0.014	0.036	-0.018	0.046	-0.114	0.004	-0.032*
		128.7	-0.044*	0.172*	-0.014	0.036	-0.018	0.046	-0.114	0.004	-0.032*
		128.8	-0.044*	0.172*	0.086	0.136	-0.018	0.046	-0.114	0.104	-0.032*
		128.9	-0.144*	0.172*	0.186	0.136	-0.018	0.046	-0.014	0.104	0.068*
		129	-0.144*	0.172*	0.086	0.036	-0.018	0.046	-0.014	0.104	0.068*
		129.1	-0.144*	0.172*	0.086	0.036	-0.018	0.046	-0.014	0.104	0.068*
		129.2	-0.144*	0.172*	0.086	0.036	-0.018	0.046	-0.014	0.104	0.068*
		129.3	0.056*	0.272*	0.086	0.036	-0.018	0.046	-0.014	0.104	0.068*
		129.4	0.056*	0.272*	0.086	0.036	-0.018	0.046	0.086	0.104	0.068*
		129.5	-0.044*	0.172*	-0.014	0.036	-0.018	-0.054	-0.014	0.004	0.068*
		129.6	-0.044*	0.172*	-0.014	0.036	-0.018	-0.054	-0.014	0.004	0.068*
		129.7	-0.044*	0.072*	-0.014	0.036	-0.018	-0.054	-0.014	0.004	0.068*
		129.8	-0.044*	0.072*	-0.014	0.036	-0.018	-0.054	-0.014	0.004	0.068*
		129.9	-0.044*	0.072*	-0.014	0.036	-0.018	-0.054	-0.014	0.004	-0.032*
		130	-0.044*	0.172*	-0.014	0.136	-0.018	-0.054	-0.014	0.004	-0.032*
		130.1	-0.044*	0.172*	-0.014	0.136	-0.018	-0.054	-0.114	0.004	0.068*
		130.2	-0.044*	0.172*	-0.014	0.036	0.082	-0.054	-0.114	0.004	0.068*
		130.3	-0.044*	0.172*	-0.114	-0.064	0.082	0.046	-0.114	0.004	0.068*
		130.4	-0.044*	0.172*	-0.014	-0.064	0.082	0.046	-0.114	0.004	0.068*
		130.5	-0.044*	0.172*	-0.014	-0.064	0.082	0.046	-0.114	0.004	0.068*
		130.6	0.056*	0.272*	-0.014	-0.064	0.082	0.046	-0.114	0.104	0.068*
		130.7	0.056*	0.272*	-0.014	-0.064	-0.018	0.046	-0.114	0.004	0.068*
		130.8	0.056*	0.272*	-0.014	-0.064	-0.018	0.046	-0.114	0.004	0.068*
		130.9	0.056*	0.272*	-0.014	-0.064	-0.018	0.046	-0.114	0.004	0.068*
		131	0.056*	0.372*	-0.014	-0.064	-0.018	0.046	-0.114	0.004	0.068*
		131.1	-0.144*	0.272*	-0.014	-0.064	-0.018	0.046	-0.014	0.004	0.168*
		131.2	-0.044*	0.272*	-0.014	-0.064	-0.118	-0.054	-0.014	0.004	0.168*
		131.3	-0.044*	0.272*	-0.014	-0.064	-0.118	-0.054	-0.114	-0.096	0.168*
		131.4	-0.044*	0.272*	-0.014	-0.064	-0.118	-0.054	-0.014	0.004	0.168*
		131.5	-0.044*	0.272*	-0.014	-0.064	-0.018	-0.054	-0.014	0.004	0.268*
		131.6	-0.044*	0.272*	0.086	0.136	-0.018	-0.054	-0.014	0.004	0.268*
		131.7	-0.044*	0.272*	-0.014	0.136	-0.018	-0.054	-0.014	0.004	0.268*
		131.8	-0.044*	0.272*	-0.014	0.036	-0.018	-0.054	-0.014	0.004	0.268*
		131.9	-0.044*	0.172*	-0.014	0.036	-0.018	-0.054	-0.014	0.004	0.168*
		132	-0.044*	0.172*	-0.014	0.036	-0.118	-0.054	-0.014	0.004	0.168*
		132.1	0.056*	0.272*	-0.014	0.036	-0.118	-0.054	-0.014	0.104	0.168*
		132.2	0.056*	0.272*	-0.014	0.036	-0.018	0.046	-0.014	0.104	0.068*
		132.3	0.056*	0.272*	-0.014	0.036	-0.018	0.046	-0.014	0.104	0.068*
		132.4	0.056*	0.272*	-0.114	-0.064	-0.018	0.046	-0.014	0.104	0.168*
		132.5	-0.044*	0.272*	-0.114	-0.064	-0.018	0.046	-0.014	0.104	0.168*
		132.6	-0.044*	0.272*	-0.014	-0.064	-0.018	0.046	-0.114	0.104	0.168*
		132.7	-0.044*	0.372*	-0.014	-0.064	-0.018	0.046	-0.014	0.004	0.168*
		132.8	-0.044*	0.372*	-0.014	-0.064	-0.018	0.046	-0.014	0.004	0.168*
		132.9	-0.044*	0.372*	-0.014	-0.064	-0.018	0.046	-0.014	0.004	0.168*
		133	-0.044*	0.372*	-0.014	-0.064	0.082	0.046	-0.014	0.004	0.168*
		133.1	0.056*	0.372*	-0.014	-0.064	0.082	0.046	0.086	0.104	0.168*
		133.2	0.056*	0.372*	-0.014	-0.064	0.082	0.046	0.086	0.104	0.268*
		133.3	0.056*	0.372*	-0.014	-0.164	0.082	0.046	0.086	0.104	0.268*
		133.4	0.056*	0.372*	-0.014	-0.164	0.082	0.046	0.086	0.104	0.268*
		133.5	-0.044*	0.272*	-0.014	-0.164	-0.018	-0.054	0.086	0.104	0.268*
		133.6	-0.044*	0.272*	-0.014	-0.164	-0.018	-0.054	0.086	0.104	0.368*
		133.7	-0.044*	0.272*	-0.014	-0.164	-0.018	-0.054	0.086	0.104	0.368*
		133.8	-0.044*	0.272*	0.086	-0.064	-0.018	-0.054	0.086	0.104	0.368*
		133.9	-0.044*	0.172*	-0.014	-0.064	-0.118	-0.054	0.086	0.104	0.368*
		134	-0.044*	0.172*	-0.014	-0.064	-0.118	-0.054	0.086	0.104	0.368*
		134.1	-0.044*	0.172*	-0.014	-0.064	-0.118	-0.054	0.086	0.104	0.268*
		134.2	-0.044*	0.172*	-0.014	0.036	-0.018	0.046	0.086	0.104	0.268*
		134.3	-0.044*	0.172*	-0.014	0.036	-0.018	0.046	-0.014	-0.096	0.268*
		134.4	-0.044*	0.172*	-0.014	0.036	-0.018	0.046	-0.014	-0.096	0.268*
		134.5	-0.044*	0.172*	-0.014	0.036	-0.018	0.046	-0.014	-0.096	0.268*
		134.6	-0.144*	0.172*	0.086	0.036	0.082	0.046	0.086	-0.096	0.268*
		134.7	-0.144*	0.172*	0.086	0.036	0.082	0.046	0.086	-0.096	0.268*
		134.8	-0.144*	0.272*	0.086	0.036	0.082	0.046	0.186	0.104	0.268*
		134.9	-0.144*	0.272*	0.086	-0.064	0.082	0.046	0.186	0.104	0.268*
		135	-0.144*	0.272*	-0.014	-0.164	0.082	0.046	0.086	0.104	0.268*
		135.1	-0.144*	0.272*	-0.014	-0.164	0.082	0.146	0.086	0.104	0.368*
		135.2	-0.144*	0.172*	-0.014	-0.164	0.082	0.146	0.086	0.104	0.468*
		135.3	-0.044*	0.172*	-0.014	-0.164	0.082	0.146	0.086	0.104	0.468*
		135.4	0.056*	0.272*	0.086	-0.064	-0.018	0.046	0.086	0.104	0.468*
		135.5	0.056*	0.272*	0.086	-0.064	-0.018	0.046	0.086	0.104	0.468*
		135.6	-0.044*	0.172*	0.086	-0.064	-0.118	-0.054	0.086	0.104	0.468*
		135.7	-0.044*	0.172*	-0.014	-0.064	-0.118	-0.054	0.186	0.104	0.468*
		135.8	-0.044*	0.172*	-0.014	-0.064	-0.118	-0.054	0.086	0.004	0.368*
		135.9	-0.044*	0.172*	-0.014	-0.064	-0.018	0.046	0.086	0.004	0.368*
		136	-0.044*	0.172*	-0.014	-0.064	-0.018	0.046	0.086	0.004	0.268*
		136.1	-0.044*	0.172*	0.086	-0.064	-0.018	0.046	0.086	0.004	0.268*
		136.2	-0.044*	0.172*	0.086	-0.064	-0.018	0.046	0.086	0.004	0.268*
		136.3	-0.144*	0.172*	0.086	-0.064	0.082	0.046	-0.014	-0.096	0.268*
		136.4	-0.144*	0.172*	0.086	-0.064	0.082	0.046	-0.014	-0.096	0.268*
		136.5	-0.144*	0.172*	0.086	-0.064	0.082	0.046	-0.014	-0.096	0.268*
		136.6	-0.144*	0.172*	0.086	-0.064	0.082	0.046	-0.014	-0.096	0.268*
		136.7	-0.144*	0.172*	-0.014	-0.164	0.082	0.046	-0.014	0.004	0.268*
		136.8	-0.144*	0.172*	-0.014	-0.264	0.082	0.046	-0.014	0.004	0.368*
		136.9	-0.044*	0.172*	-0.014	-0.164	-0.018	-0.054	0.086	0.004	0.368*
		137	-0.044*	0.172*	-0.014	-0.164	-0.018	-0.054	0.086	0.004	0.368*
		137.1	-0.044*	0.172*	0.086	-0.064	-0.018	0.046	0.086	0.004	0.368*
		137.2	-0.044*	0.172*	0.086	-0.064	-0.018	-0.054	-0.014	-0.096	0.368*
		137.3	-0.044*	0.072*	0.086	-0.064	-0.018	-0.054	-0.014	-0.096	0.368*
		137.4	-0.044*	0.072*	0.086	-0.064	-0.018	-0.054	-0.014	-0.096	0.368*
		137.5	-0.044*	0.072*	0.086	-0.064	-0.118	-0.054	0.086	0.004	0.468*
		137.6	-0.144*	-0.028*	0.086	-0.064	-0.018	0.046	0.086	0.004	0.368*
		137.7	-0.144*	-0.028*	0.086	-0.064	0.082	0.046	0.086	0.004	0.368*
		137.8	-0.144*	-0.028*	0.086	-0.064	0.082	0.046	-0.014	0.004	0.368*
		137.9	-0.144*	-0.028*	0.086	-0.064	0.082	0.046	-0.014	0.004	0.368*
		138	-0.144*	0.072*	0.086	-0.064	0.082	0.046	-0.014	0.004	0.368*
		138.1	-0.144*	0.072*	0.086	-0.064	0.082	0.046	-0.014	-0.096	0.368*
		138.2	-0.044*	0.072*	-0.014	-0.164	0.082	0.046	-0.014	-0.096	0.368*
		138.3	-0.044*	0.072*	-0.014	-0.064	0.082	0.046	-0.014	0.004	0.368*
		138.4	-0.144*	0.072*	0.086	0.036	0.082	0.046	0.086	0.004	0.368*
		138.5	-0.144*	0.072*	0.186	0.036	-0.018	-0.054	0.086	0.004	0.368*
		138.6	-0.144*	0.072*	0.186	0.036	-0.018	-0.054	-0.014	-0.096	0.368*
		138.7	-0.144*	0.072*	0.186	0.036	-0.018	-0.054	-0.014	-0.096	0.368*
		138.8	-0.144*	0.072*	0.186	-0.064	0.082	-0.054	-0.014	-0.096	0.368*
		138.9	-0.144*	0.072*	0.186	-0.064	0.082	-0.054	-0.114	-0.096	0.368*
		139	-0.044*	0.172*	0.086	-0.064	0.082	-0.054	-0.114	-0.096	0.368*
		139.1	-0.044*	0.072*	0.086	-0.064	0.082	0.046	-0.114	-0.096	0.368*
		139.2	-0.044*	0.072*	0.086	-0.064	0.082	0.046	-0.114	-0.096	0.368*
		139.3	-0.044*	0.072*	-0.014	-0.064	0.082	0.046	-0.114	-0.096	0.368*
		139.4	-0.044*	0.072*	-0.014	-0.064	0.082	-0.054	-0.114	-0.096	0.268*
		139.5	-0.044*	0.072*	-0.014	-0.064	0.082	-0.054	-0.114	0.004	0.268*
		139.6	-0.044*	0.172*	-0.014	-0.064	0.082	-0.054	-0.014	-0.096	0.368*
		139.7	-0.044*	0.172*	-0.014	-0.064	0.082	-0.054	-0.014	-0.096	0.368*
		139.8	-0.044*	0.172*	-0.014	-0.064	0.082	-0.054	-0.014	-0.096	0.368*
		139.9	-0.044*	0.172*	-0.014	-0.064	0.082	-0.054	-0.014	-0.096	0.368*
		140	-0.144*	0.072*	-0.014	-0.064	0.082	-0.054	-0.014	-0.096	0.368*
		140.1	-0.144*	0.072*	-0.014	-0.064	-0.018	-0.054	-0.014	-0.096	0.368*
		140.2	-0.144*	0.072*	0.086	0.036	-0.018	-0.054	-0.014	-0.096	0.368*
		140.3	-0.144*	0.072*	0.086	0.036	-0.018	-0.054	-0.014	-0.096	0.368*
		140.4	-0.144*	0.072*	-0.014	-0.064	-0.018	-0.054	-0.014	-0.096	0.368*
		140.5	-0.144*	0.072*	0.086	-0.064	-0.018	-0.054	-0.014	-0.096	0.368*
		140.6	-0.144*	0.072*	-0.014	-0.064	-0.018	-0.054	-0.014	-0.096	0.368*
		140.7	-0.044*	0.172*	-0.014	0.036	-0.018	0.046	-0.014	-0.096	0.368*
		140.8	-0.044*	0.172*	-0.014	0.036	-0.018	0.046	-0.014	-0.096	0.268*
		140.9	-0.044*	0.172*	-0.014	0.036	-0.018	0.046	-0.114	0.004	0.168*
		141	0.056*	0.172*	-0.014	0.036	0.082	0.046	-0.114	0.004	0.168*
		141.1	0.056*	0.172*	-0.014	0.036	0.082	0.046	-0.114	0.004	0.168*
		141.2	-0.044*	0.272*	-0.014	0.036	0.082	0.046	-0.114	0.004	0.168*
		141.3	-0.044*	0.172*	-0.014	0.036	0.082	-0.054	-0.114	0.004	0.168*
		141.4	-0.044*	0.172*	-0.014	0.036	0.082	-0.054	-0.014	0.004	0.168*
		141.5	-0.044*	0.172*	-0.014	0.036	0.082	-0.054	-0.014	0.004	0.168*
		141.6	-0.044*	0.172*	-0.014	0.036	0.082	-0.054	-0.014	0.004	0.168*
		141.7	-0.044*	0.172*	-0.014	0.036	0.082	-0.054	-0.014	0.004	0.268*
		141.8	-0.144*	0.072*	-0.114	-0.164	0.082	-0.054	-0.014	0.004	0.268*
		141.9	-0.144*	0.072*	-0.014	-0.064	-0.018	-0.154	-0.114	-0.096	0.268*
		142	-0.144*	0.072*	-0.014	0.036	-0.018	-0.154	-0.114	-0.196	0.268*
		142.1	-0.144*	0.072*	-0.014	0.036	-0.018	-0.054	-0.014	-0.096	0.268*
		142.2	-0.144*	0.072*	-0.014	0.036	-0.018	-0.054	-0.014	-0.096	0.268*
		142.3	-0.044*	0.172*	-0.014	0.036	-0.018	-0.054	-0.014	-0.096	0.368*
		142.4	0.056*	0.172*	-0.014	0.036	-0.018	-0.054	-0.014	-0.096	0.368*
		142.5	0.056*	0.172*	-0.014	0.036	-0.018	-0.054	-0.014	-0.096	0.368*
		142.6	0.056*	0.172*	-0.014	0.036	0.082	0.046	-0.014	-0.096	0.368*
		142.7	0.056*	0.172*	-0.014	0.036	0.082	0.046	-0.014	-0.096	0.368*
		142.8	0.056*	0.172*	-0.014	0.036	0.082	0.046	-0.014	-0.096	0.368*
		142.9	0.056*	0.172*	-0.014	0.036	0.082	0.046	-0.014	-0.096	0.268*
		143	0.056*	0.072*	-0.014	0.036	0.082	0.046	-0.014	-0.096	0.168*
		143.1	0.056*	0.172*	0.086	0.036	0.082	0.046	0.086	-0.096	0.168*
		143.2	0.056*	0.172*	0.086	0.036	0.082	0.046	0.086	-0.096	0.168*
		143.3	0.056*	0.172*	0.086	0.036	-0.018	0.046	0.086	0.004	0.168*
		143.4	0.056*	0.172*	0.086	0.136	-0.018	-0.054	-0.114	-0.096	0.168*
		143.5	0.056*	0.172*	0.086	0.136	0.082	-0.054	-0.114	-0.096	0.168*
		143.6	0.056*	0.272*	-0.014	0.036	0.082	-0.054	-0.114	-0.096	0.168*
		143.7	0.056*	0.272*	-0.114	0.036	-0.018	-0.154	-0.114	-0.096	0.168*
		143.8	0.056*	0.272*	-0.014	0.136	0.082	-0.054	-0.014	0.004	0.268*
		143.9	-0.044*	0.172*	-0.014	0.136	0.082	-0.054	-0.014	0.004	0.268*
		144	-0.044*	0.172*	-0.014	0.136	0.082	0.046	-0.014	0.004	0.268*
		144.1	-0.044*	0.172*	-0.014	0.036	0.082	0.046	-0.014	0.004	0.168*
		144.2	-0.044*	0.172*	-0.014	0.036	0.082	0.046	-0.014	0.004	0.168*
		144.3	0.056*	0.172*	-0.014	0.036	0.082	0.046	-0.014	0.004	0.168*
		144.4	0.056*	0.172*	-0.014	0.036	0.082	0.046	-0.014	0.004	0.168*
		144.5	0.056*	0.172*	-0.014	0.036	0.082	0.046	-0.014	0.004	0.168*
		144.6	0.056*	0.072*	-0.014	0.036	0.082	0.046	-0.014	0.004	0.168*
		144.7	0.056*	0.172*	-0.014	0.036	0.082	0.046	-0.014	0.004	0.268*
		144.8	0.056*	0.172*	-0.014	0.036	0.082	0.046	-0.014	-0.096	0.268*
		144.9	0.056*	0.172*	0.086	0.036	0.082	0.046	-0.014	-0.096	0.268*
		145	0.056*	0.172*	0.086	0.136	0.082	0.046	-0.014	-0.096	0.168*
		145.1	0.056*	0.172*	0.086	0.136	0.082	0.046	-0.014	-0.096	0.168*
		145.2	0.156*	0.272*	0.086	0.136	0.082	0.046	0.086	0.004	0.168*
		145.3	0.056*	0.172*	0.086	0.136	0.082	0.046	0.086	0.004	0.168*
		145.4	0.056*	0.172*	0.086	0.136	0.182	0.046	0.086	0.004	0.168*
		145.5	0.056*	0.172*	0.086	0.136	0.082	-0.154	0.186	0.104	0.168*
		145.6	0.056*	0.172*	0.086	0.136	0.082	-0.154	0.086	0.104	0.168*
		145.7	0.056*	0.172*	0.086	0.136	0.082	-0.154	-0.014	0.004	0.168*
		145.8	0.056*	0.172*	0.086	0.136	0.082	-0.154	-0.014	0.004	0.168*
		145.9	0.056*	0.172*	0.086	0.036	-0.018	-0.154	-0.014	0.004	0.168*
		146	0.056*	0.172*	0.086	0.036	0.082	-0.054	-0.014	0.004	0.168*
		146.1	0.056*	0.172*	0.086	0.036	0.082	0.046	-0.014	0.004	0.168*
		146.2	0.056*	0.172*	0.086	0.036	0.082	0.046	-0.014	0.004	0.168*
		146.3	-0.044*	0.172*	0.086	0.036	0.082	0.046	-0.014	0.004	0.168*
		146.4	-0.044*	0.172*	0.086	0.036	0.082	0.046	-0.014	0.004	0.168*
		146.5	0.056*	0.172*	0.086	0.136	0.082	0.046	-0.014	0.004	0.168*
		146.6	0.056*	0.272*	0.086	0.136	0.082	0.046	-0.014	0.004	0.168*
		146.7	0.056*	0.272*	-0.114	0.036	0.082	0.046	-0.014	0.004	0.268*
		146.8	0.156*	0.372*	-0.114	0.036	0.082	0.046	-0.014	0.004	0.268*
		146.9	0.156*	0.372*	-0.114	0.036	0.082	0.046	-0.014	0.004	0.268*
		147	0.156*	0.372*	-0.114	0.036	0.082	0.046	-0.014	0.004	0.168*
		147.1	0.156*	0.272*	-0.114	0.036	0.182	0.046	-0.014	0.004	0.268*
		147.2	0.056*	0.172*	-0.014	0.036	0.182	0.046	-0.014	0.004	0.268*
		147.3	0.056*	0.172*	-0.014	0.036	0.182	0.046	-0.014	0.004	0.268*
		147.4	0.056*	0.172*	-0.014	0.036	0.182	0.046	-0.014	0.004	0.268*
		147.5	0.056*	0.172*	0.086	0.136	0.182	0.046	-0.014	0.004	0.268*
		147.6	0.056*	0.172*	0.086	0.136	0.182	0.046	-0.014	0.004	0.168*
		147.7	0.056*	0.172*	0.086	0.136	0.182	0.046	-0.114	0.004	0.168*
		147.8	0.056*	0.172*	0.086	0.136	0.082	-0.054	-0.114	0.004	0.168*
		147.9	0.056*	0.172*	0.086	0.036	0.082	-0.054	-0.114	0.104	0.168*
		148	0.056*	0.172*	0.086	0.036	0.082	-0.054	-0.114	0.104	0.168*
		148.1	0.056*	0.272*	0.086	0.036	0.082	-0.054	-0.114	0.104	0.168*
		148.2	0.056*	0.272*	-0.014	0.036	0.082	-0.054	-0.114	0.104	0.168*
		148.3	0.056*	0.272*	-0.014	0.036	-0.018	-0.154	-0.114	0.104	0.168*
		148.4	0.056*	0.272*	-0.014	0.036	-0.018	-0.154	-0.114	0.104	0.268*
		148.5	0.056*	0.272*	-0.014	0.036	-0.018	-0.154	-0.214	0.004	0.268*
		148.6	0.056*	0.272*	-0.014	0.136	-0.018	-0.154	-0.214	-0.096	0.268*
		148.7	0.056*	0.272*	-0.014	0.136	0.082	-0.154	-0.214	-0.096	0.268*
		148.8	0.056*	0.272*	-0.014	0.136	0.082	-0.154	-0.214	-0.096	0.268*
		148.9	-0.044*	0.272*	-0.014	0.136	0.082	-0.154	-0.214	-0.096	0.268*
		149	0.056*	0.272*	0.086	0.136	0.082	-0.054	-0.214	-0.096	0.268*
		149.1	0.056*	0.272*	0.086	0.136	0.082	-0.054	-0.214	-0.096	0.168*
		149.2	0.056*	0.272*	0.086	0.136	0.082	-0.054	-0.114	0.004	0.268*
		149.3	0.056*	0.272*	0.086	0.136	0.082	-0.054	-0.014	0.004	0.268*
		149.4	0.056*	0.172*	0.086	0.136	0.082	-0.054	-0.014	0.004	0.268*
		149.5	-0.044*	0.072*	-0.014	0.036	0.082	-0.054	-0.014	0.004	0.268*
		149.6	-0.044*	0.072*	-0.014	0.036	0.182	0.046	-0.014	0.004	0.268*
		149.7	-0.044*	0.172*	-0.014	0.036	0.182	0.046	-0.014	0.004	0.268*
		149.8	-0.044*	0.172*	-0.014	0.036	0.182	0.046	-0.014	0.004	0.168*
[truncated: 5,501 more rows]

## Sheet: Figure_2_B
		RU	RBD (WT)
		50	0.0684
		66	0.0675
		55	0.0675
		61	0.0662
		50	0.0649
		55	0.0666
		22	0.06642
		48	0.0701
		73	0.07132
		210	0.0637
		215	0.0639
		214	0.0642
		212	0.0628
		207	0.0637
		206	0.0639
		52	0.06621
		103	0.0649
		176	0.06454
		727	0.0502
		729	0.0488
		774	0.0463
		606	0.05871
		577	0.05603
		506	0.05352
		790	0.05975
		785	0.05205
		697	0.05259

## Sheet: Figure_2_C
		RU	RBD3 (WT)
		50	0.8951
		66	0.9343
		55	0.8691
		61	0.9914
		50	0.8224
		55	0.8931
		22	0.7857
		48	1.142
		73	1.088
		210	0.8637
		215	0.8569
		214	0.8968
		212	0.8776
		207	0.8652
		206	0.8904
		52	0.9667
		103	1.075
		176	0.9948
		727	0.6369
		729	0.6393
		774	0.6097
		606	0.6578
		577	0.5917
		506	0.7667
		790	0.639
		785	0.6636
		697	0.6494

## Sheet: Figure_2_D
		[RBD]	Plateau (RU)
		3.23125	0.3526*
		6.4625	1.079*
		12.925	2.032
		25.85	3.064
		51.7	4.982
		103.4	6.859
		206.8	8.639
		413.6	10.01
		3.23125

## Sheet: Figure_2_E
		RU	RBD (WT)
		50	52.2
		66	70.9
		55	65.4
		61	51.9
		50	66.1
		55	69.1
		22	75.76
		48	75.99
		73	70.27
		210	68.51
		215	68.43
		214	67.56
		212	61.07
		207	64.06
		206	63.93
		52	58.54
		103	64.77
		176	68.66
		727	70.79
		729	63.65
		774	70.12
		606	70.5
		577	63.05
		506	67.12
		790	65.16
		785	81.65
		697	71.45
