# Supplementary material for: Effects of common mutations in the SARS-CoV-2 Spike RBD and its ligand, the human ACE2 receptor on binding affinity and kinetics
Source: eLife. 2021 Aug 26;10:e70658. doi: 10.7554/eLife.70658 (PMC8480977; doi:10.7554/eLife.70658)
Supplement: Figure 3—figure supplement 1—source data 1. [file elife-70658-fig3-figsupp1-data1.xlsx]

## Sheet: Figure_S4_A
		RU	E484K + N501Y (UK)
		61	0.01158
		50	0.01235
		55	0.01156
		22	0.01139
		48	0.01139
		73	0.01124
		212	0.01101
		207	0.01085
		206	0.01059
		52	0.01138
		103	0.01108
		176	0.01041

## Sheet: Figure_S4_B
		RU	E484K + N501Y (UK)
		61	2.446
		50	2.213
		55	2.338
		22	1.845
		48	2.434
		73	2.168
		212	1.943
		207	1.892
		206	1.928
		52	2.335
		103	2.346
		176	2.079
