# Supplementary material for: Effects of common mutations in the SARS-CoV-2 Spike RBD and its ligand, the human ACE2 receptor on binding affinity and kinetics
Source: eLife. 2021 Aug 26;10:e70658. doi: 10.7554/eLife.70658 (PMC8480977; doi:10.7554/eLife.70658)
Supplement: Figure 3—figure supplement 2—source data 1. [file elife-70658-fig3-figsupp2-data1.xlsx]

## Sheet: Figure_S5_A
		Time	3.9063	7.8125	15.6250	31.3	62.5	125	250	500	3.91
		-50	0.484*	0.26*	0.278*	-0.042*	0.322	-0.064	-0.182	-0.484	0.098*
		-49.9	0.384*	0.16*	0.278*	-0.042*	0.322	0.036	-0.182	-0.484	0.098*
		-49.8	0.384*	0.16*	0.278*	-0.042*	0.422	0.036	-0.182	-0.384	0.098*
		-49.7	0.384*	0.16*	0.178*	-0.142*	0.522	0.136	-0.182	-0.384	-0.002*
		-49.6	0.384*	0.16*	0.178*	-0.142*	0.522	0.036	-0.182	-0.384	-0.002*
		-49.5	0.484*	0.26*	0.178*	-0.142*	0.522	0.136	-0.182	-0.384	0.098*
		-49.4	0.484*	0.16*	0.278*	-0.142*	0.422	0.036	-0.082	-0.384	0.098*
		-49.3	0.484*	0.16*	0.278*	-0.142*	0.422	0.036	0.018	-0.284	0.098*
		-49.2	0.384*	0.26*	0.178*	-0.242*	0.422	0.136	-0.082	-0.284	0.098*
		-49.1	0.384*	0.26*	0.178*	-0.142*	0.522	0.136	-0.182	-0.284	0.098*
		-49	0.384*	0.26*	0.278*	-0.142*	0.522	0.136	-0.182	-0.284	0.198*
		-48.9	0.284*	0.16*	0.278*	-0.142*	0.422	0.136	-0.082	-0.284	0.198*
		-48.8	0.284*	0.16*	0.278*	-0.142*	0.422	0.136	-0.082	-0.184	0.198*
		-48.7	0.384*	0.16*	0.278*	-0.142*	0.422	0.136	-0.182	-0.284	0.098*
		-48.6	0.484*	0.26*	0.178*	-0.242*	0.522	0.136	-0.182	-0.384	0.098*
		-48.5	0.484*	0.26*	0.178*	-0.142*	0.522	0.136	-0.082	-0.384	0.098*
		-48.4	0.384*	0.16*	0.278*	-0.142*	0.422	0.036	0.018	-0.284	0.098*
		-48.3	0.384*	0.26*	0.278*	-0.142*	0.522	0.236	-0.082	-0.284	0.098*
		-48.2	0.384*	0.16*	0.378*	-0.142*	0.522	0.236	-0.182	-0.284	0.098*
		-48.1	0.284*	0.16*	0.278*	-0.242*	0.622	0.236	-0.182	-0.284	0.198*
		-48	0.284*	0.16*	0.178*	-0.142*	0.522	0.136	-0.082	-0.284	0.198*
		-47.9	0.284*	0.16*	0.178*	-0.142*	0.522	0.236	-0.082	-0.284	0.198*
		-47.8	0.284*	0.16*	0.278*	-0.142*	0.422	0.236	-0.082	-0.184	0.198*
		-47.7	0.384*	0.26*	0.278*	-0.142*	0.422	0.036	0.018	-0.184	0.198*
		-47.6	0.384*	0.26*	0.178*	-0.142*	0.422	0.036	-0.082	-0.284	0.098*
		-47.5	0.484*	0.36*	0.278*	-0.142*	0.522	0.136	-0.082	-0.284	0.198*
		-47.4	0.484*	0.36*	0.278*	-0.242*	0.422	0.136	-0.182	-0.384	0.198*
		-47.3	0.284*	0.16*	0.178*	-0.242*	0.422	0.136	-0.182	-0.284	0.198*
		-47.2	0.284*	0.16*	0.178*	-0.142*	0.522	0.136	-0.082	-0.284	0.198*
		-47.1	0.284*	0.16*	0.278*	-0.042*	0.422	0.036	-0.082	-0.284	0.198*
		-47	0.284*	0.26*	0.278*	-0.142*	0.422	0.036	-0.082	-0.284	0.198*
		-46.9	0.284*	0.16*	0.278*	-0.142*	0.322	0.036	-0.182	-0.384	0.198*
		-46.8	0.284*	0.16*	0.278*	-0.042*	0.422	0.036	0.018	-0.184	0.198*
		-46.7	0.284*	0.16*	0.278*	-0.042*	0.422	0.036	0.018	-0.184	0.098*
		-46.6	0.284*	0.26*	0.378*	-0.042*	0.422	0.036	-0.082	-0.184	-0.002*
		-46.5	0.284*	0.26*	0.278*	-0.042*	0.322	0.036	-0.182	-0.384	0.098*
		-46.4	0.284*	0.16*	0.278*	-0.042*	0.322	0.036	-0.082	-0.284	0.098*
		-46.3	0.284*	0.16*	0.278*	-0.042*	0.422	0.036	-0.082	-0.284	0.198*
		-46.2	0.284*	0.16*	0.478*	0.058*	0.322	-0.064	-0.082	-0.284	0.198*
		-46.1	0.284*	0.26*	0.378*	-0.042*	0.322	-0.064	-0.182	-0.384	0.098*
		-46	0.384*	0.26*	0.278*	-0.042*	0.322	0.036	-0.282	-0.384	0.198*
		-45.9	0.384*	0.26*	0.278*	-0.042*	0.322	0.136	-0.282	-0.384	0.198*
		-45.8	0.384*	0.26*	0.278*	-0.042*	0.322	0.136	-0.182	-0.284	0.198*
		-45.7	0.384*	0.16*	0.278*	-0.042*	0.322	0.036	-0.082	-0.284	0.198*
		-45.6	0.284*	0.06*	0.178*	-0.142*	0.322	0.036	-0.082	-0.284	0.198*
		-45.5	0.184*	0.06*	0.278*	-0.042*	0.422	0.036	-0.182	-0.384	0.198*
		-45.4	0.184*	0.16*	0.278*	-0.042*	0.222	0.036	-0.182	-0.384	0.198*
		-45.3	0.184*	0.16*	0.278*	-0.042*	0.222	0.036	-0.282	-0.384	0.198*
		-45.2	0.384*	0.26*	0.278*	-0.042*	0.222	0.036	-0.282	-0.384	0.198*
		-45.1	0.284*	0.16*	0.278*	-0.042*	0.322	0.036	-0.282	-0.384	0.098*
		-45	0.284*	0.16*	0.278*	-0.042*	0.322	0.036	-0.182	-0.484	0.198*
		-44.9	0.184*	0.06*	0.278*	0.058*	0.422	0.136	-0.182	-0.484	0.198*
		-44.8	0.284*	0.16*	0.278*	0.158*	0.422	0.136	-0.082	-0.384	0.398*
		-44.7	0.384*	0.26*	0.178*	0.058*	0.222	0.036	-0.182	-0.484	0.398*
		-44.6	0.284*	0.16*	0.078*	0.058*	0.222	-0.064	-0.082	-0.384	0.298*
		-44.5	0.284*	0.16*	0.078*	0.158*	0.322	0.136	-0.182	-0.384	0.398*
		-44.4	0.284*	0.16*	0.178*	0.158*	0.322	0.036	-0.182	-0.384	0.398*
		-44.3	0.284*	0.16*	0.078*	-0.042*	0.322	0.036	-0.182	-0.384	0.298*
		-44.2	0.284*	0.06*	0.278*	0.158*	0.322	0.136	-0.182	-0.284	0.198*
		-44.1	0.284*	0.16*	0.378*	0.158*	0.322	0.036	-0.182	-0.184	-0.002*
		-44	0.384*	0.16*	0.378*	0.058*	0.222	-0.064	-0.182	-0.384	-0.102*
		-43.9	0.284*	0.06*	0.378*	-0.042*	0.222	0.036	-0.082	-0.184	-0.202*
		-43.8	0.284*	0.16*	0.378*	-0.042*	0.222	-0.064	-0.182	-0.184	-0.102*
		-43.7	0.284*	0.06*	0.278*	-0.042*	0.222	-0.064	-0.082	-0.084	-0.202*
		-43.6	0.284*	0.16*	0.278*	-0.242*	0.222	-0.064	-0.182	-0.184	-0.102*
		-43.5	0.284*	-0.04*	0.378*	-0.042*	0.322	-0.064	-0.082	-0.184	-0.102*
		-43.4	0.184*	0.06*	0.378*	-0.042*	0.222	-0.064	-0.182	-0.184	-0.002*
		-43.3	0.284*	0.06*	0.278*	-0.042*	0.222	-0.064	-0.082	-0.284	-0.102*
		-43.2	0.284*	0.06*	0.278*	-0.042*	0.222	0.036	-0.082	-0.284	-0.002*
		-43.1	0.384*	0.06*	0.278*	-0.142*	0.322	0.136	-0.082	-0.284	-0.002*
		-43	0.184*	-0.04*	0.478*	-0.042*	0.322	0.036	-0.282	-0.284	-0.002*
		-42.9	0.184*	-0.04*	0.378*	-0.042*	0.322	-0.064	-0.182	-0.284	-0.002*
		-42.8	0.384*	0.06*	0.278*	-0.042*	0.322	0.036	-0.182	-0.384	-0.002*
		-42.7	0.384*	0.16*	0.278*	-0.042*	0.222	0.036	-0.082	-0.284	0.098*
		-42.6	0.384*	0.16*	0.278*	-0.042*	0.122	-0.064	-0.082	-0.184	0.098*
		-42.5	0.184*	0.06*	0.278*	-0.042*	0.322	0.036	0.018	-0.184	-0.002*
		-42.4	0.184*	-0.04*	0.278*	-0.042*	0.322	0.036	0.018	-0.184	-0.002*
		-42.3	0.184*	-0.04*	0.278*	-0.042*	0.322	0.036	-0.082	-0.384	-0.002*
		-42.2	0.284*	-0.04*	0.278*	-0.042*	0.322	0.036	-0.182	-0.384	-0.002*
		-42.1	0.284*	0.06*	0.178*	-0.042*	0.322	0.036	-0.182	-0.284	0.098*
		-42	0.284*	0.06*	0.178*	-0.042*	0.322	0.036	-0.182	-0.284	0.098*
		-41.9	0.184*	-0.04*	0.178*	-0.042*	0.322	0.136	-0.082	-0.284	0.098*
		-41.8	0.284*	-0.04*	0.178*	-0.142*	0.522	0.236	0.018	-0.084	0.198*
		-41.7	0.284*	0.06*	0.378*	0.058*	0.322	0.136	0.018	-0.084	0.298*
		-41.6	0.284*	0.06*	0.278*	0.058*	0.322	0.136	0.018	-0.084	0.198*
		-41.5	0.284*	0.06*	0.178*	-0.042*	0.322	0.136	0.018	-0.084	0.198*
		-41.4	0.384*	0.16*	0.178*	-0.042*	0.322	0.036	-0.082	-0.184	0.198*
		-41.3	0.384*	0.06*	0.178*	-0.042*	0.222	-0.064	-0.182	-0.184	0.198*
		-41.2	0.384*	0.06*	0.278*	0.058*	0.222	-0.064	-0.182	-0.184	0.098*
		-41.1	0.284*	-0.04*	0.178*	-0.042*	0.222	0.036	0.018	-0.084	0.198*
		-41	0.484*	0.16*	0.278*	-0.042*	0.222	0.036	0.018	-0.084	0.098*
		-40.9	0.484*	0.16*	0.178*	-0.042*	0.222	0.036	0.018	-0.084	0.198*
		-40.8	0.484*	0.16*	0.178*	-0.042*	0.322	0.136	0.018	0.016	0.198*
		-40.7	0.384*	0.06*	0.078*	-0.142*	0.222	0.036	-0.082	-0.084	0.198*
		-40.6	0.284*	0.06*	0.078*	-0.142*	0.322	0.136	-0.082	-0.084	0.198*
		-40.5	0.284*	0.06*	0.078*	-0.142*	0.322	0.136	-0.182	-0.184	0.198*
		-40.4	0.284*	0.06*	0.178*	-0.042*	0.322	0.136	-0.182	-0.184	0.198*
		-40.3	0.284*	-0.04*	0.078*	-0.042*	0.322	0.136	-0.082	-0.184	0.198*
		-40.2	0.284*	0.06*	-0.022*	-0.042*	0.322	0.036	-0.182	-0.284	0.198*
		-40.1	0.384*	0.16*	0.078*	-0.042*	0.222	-0.064	-0.182	-0.184	0.198*
		-40	0.384*	0.16*	0.078*	-0.042*	0.222	-0.064	-0.182	-0.184	0.198*
		-39.9	0.384*	0.16*	0.078*	-0.142*	0.122	0.036	-0.182	-0.184	0.198*
		-39.8	0.284*	-0.04*	0.078*	-0.142*	0.222	0.036	-0.082	-0.084	0.098*
		-39.7	0.184*	-0.04*	0.078*	-0.142*	0.322	0.136	-0.082	-0.184	-0.002*
		-39.6	0.184*	0.06*	0.078*	-0.142*	0.322	0.136	-0.082	-0.084	0.098*
		-39.5	0.184*	0.06*	-0.122*	-0.242*	0.222	0.036	-0.082	-0.084	0.198*
		-39.4	0.084*	-0.04*	-0.122*	-0.142*	0.222	0.036	-0.182	-0.184	0.198*
		-39.3	0.284*	0.06*	-0.022*	-0.142*	0.222	0.136	-0.182	-0.184	0.198*
		-39.2	0.284*	0.06*	-0.022*	-0.142*	0.222	0.136	-0.082	-0.184	0.198*
		-39.1	0.284*	0.06*	-0.022*	-0.142*	0.222	0.136	-0.082	-0.184	0.198*
		-39	0.284*	0.06*	-0.022*	-0.142*	0.222	0.036	-0.082	-0.184	0.098*
		-38.9	0.284*	0.06*	0.078*	-0.042*	0.222	0.036	-0.082	-0.084	0.098*
		-38.8	0.284*	0.06*	0.078*	-0.142*	0.322	0.036	-0.182	-0.184	0.098*
		-38.7	0.284*	0.16*	-0.022*	-0.142*	0.322	0.036	-0.182	-0.184	0.098*
		-38.6	0.284*	0.16*	0.078*	-0.142*	0.322	0.036	-0.182	-0.184	0.098*
		-38.5	0.384*	0.16*	0.078*	-0.042*	0.322	0.136	-0.182	-0.184	0.098*
		-38.4	0.384*	0.16*	-0.022*	-0.142*	0.322	0.136	-0.182	-0.084	0.098*
		-38.3	0.284*	0.16*	-0.022*	-0.142*	0.322	0.136	-0.182	-0.084	0.098*
		-38.2	0.284*	0.16*	-0.022*	-0.142*	0.322	0.136	-0.182	-0.084	0.098*
		-38.1	0.284*	0.16*	-0.022*	-0.142*	0.322	0.136	-0.082	-0.084	0.098*
		-38	0.184*	0.06*	-0.022*	-0.042*	0.322	0.136	-0.082	-0.084	0.098*
		-37.9	0.184*	0.16*	-0.022*	-0.042*	0.322	0.236	-0.082	-0.084	0.098*
		-37.8	0.184*	0.16*	-0.022*	-0.042*	0.322	0.236	-0.082	-0.184	0.098*
		-37.7	0.284*	0.16*	-0.022*	-0.042*	0.322	0.236	-0.082	-0.084	0.198*
		-37.6	0.284*	0.16*	0.078*	0.058*	0.222	0.136	-0.082	-0.084	0.098*
		-37.5	0.284*	0.16*	0.178*	0.058*	0.222	0.136	-0.182	-0.184	0.098*
		-37.4	0.284*	0.16*	-0.022*	-0.042*	0.222	0.136	-0.282	-0.184	0.098*
		-37.3	0.284*	0.16*	-0.022*	-0.042*	0.222	0.136	-0.182	-0.184	0.098*
		-37.2	0.284*	0.06*	-0.022*	-0.042*	0.222	0.136	-0.182	-0.184	0.098*
		-37.1	0.284*	0.06*	-0.022*	-0.042*	0.322	0.236	-0.182	-0.184	-0.002*
		-37	0.284*	0.06*	-0.022*	-0.042*	0.322	0.236	-0.182	-0.084	-0.002*
		-36.9	0.284*	0.06*	-0.022*	-0.042*	0.422	0.236	-0.182	-0.084	0.098*
		-36.8	0.184*	0.16*	-0.022*	-0.042*	0.422	0.236	-0.182	-0.084	0.098*
		-36.7	0.284*	0.26*	-0.022*	-0.142*	0.322	0.136	-0.182	-0.184	0.098*
		-36.6	0.284*	0.26*	-0.022*	-0.142*	0.322	0.136	-0.182	-0.184	0.098*
		-36.5	0.184*	0.16*	-0.022*	-0.142*	0.322	0.136	-0.182	-0.184	-0.002*
		-36.4	0.184*	0.16*	-0.022*	-0.042*	0.322	0.136	-0.182	-0.184	-0.002*
		-36.3	0.184*	0.16*	-0.022*	-0.042*	0.222	0.136	-0.282	-0.284	-0.002*
		-36.2	0.184*	0.16*	-0.022*	-0.042*	0.222	0.136	-0.182	-0.284	-0.002*
		-36.1	0.084*	0.06*	-0.022*	-0.142*	0.222	0.136	-0.182	-0.284	0.098*
		-36	0.084*	0.06*	-0.122*	-0.242*	0.222	0.136	-0.182	-0.184	0.098*
		-35.9	0.184*	0.06*	-0.122*	-0.142*	0.122	0.136	-0.282	-0.184	0.098*
		-35.8	0.184*	0.16*	-0.122*	-0.142*	0.322	0.136	-0.282	-0.184	0.098*
		-35.7	0.184*	0.16*	-0.022*	-0.142*	0.322	0.136	-0.282	-0.184	0.098*
		-35.6	0.184*	0.16*	-0.022*	-0.142*	0.322	0.136	-0.282	-0.184	0.098*
		-35.5	0.184*	0.16*	-0.022*	-0.142*	0.322	0.136	-0.282	-0.184	0.098*
		-35.4	0.284*	0.16*	-0.022*	-0.042*	0.322	0.136	-0.182	-0.184	0.098*
		-35.3	0.284*	0.16*	-0.022*	-0.042*	0.222	0.036	-0.282	-0.284	0.098*
		-35.2	0.184*	0.06*	-0.122*	-0.042*	0.222	0.036	-0.282	-0.184	0.098*
		-35.1	0.184*	0.06*	-0.122*	-0.042*	0.222	0.036	-0.182	-0.084	0.198*
		-35	0.084*	0.06*	-0.122*	-0.042*	0.222	0.136	-0.282	-0.184	0.098*
		-34.9	0.084*	0.06*	-0.122*	-0.042*	0.222	0.136	-0.182	-0.084	0.098*
		-34.8	0.084*	0.06*	-0.022*	-0.042*	0.222	0.136	-0.182	-0.184	0.098*
		-34.7	0.084*	0.06*	-0.022*	-0.042*	0.322	0.036	-0.282	-0.184	0.098*
		-34.6	0.184*	0.16*	-0.022*	-0.042*	0.322	0.036	-0.182	-0.184	0.098*
		-34.5	0.184*	0.16*	-0.022*	-0.042*	0.222	0.036	-0.182	-0.184	0.098*
		-34.4	0.184*	0.16*	0.078*	-0.042*	0.222	0.036	-0.182	-0.084	0.098*
		-34.3	0.184*	0.16*	0.078*	0.058*	0.222	0.036	-0.182	-0.084	0.098*
		-34.2	0.184*	0.16*	-0.022*	-0.042*	0.122	-0.064	-0.182	-0.084	0.198*
		-34.1	0.184*	0.16*	-0.022*	-0.042*	0.122	0.036	-0.182	-0.084	0.198*
		-34	0.184*	0.16*	-0.022*	-0.042*	0.122	0.036	-0.182	-0.084	0.198*
		-33.9	0.184*	0.16*	-0.022*	0.058*	0.122	0.036	-0.082	-0.084	0.198*
		-33.8	0.184*	0.16*	-0.022*	0.058*	0.222	0.036	-0.082	-0.084	0.198*
		-33.7	0.184*	0.16*	-0.022*	0.058*	0.222	0.036	-0.082	-0.084	0.198*
		-33.6	0.184*	0.16*	0.078*	0.058*	0.222	0.036	-0.082	0.016	0.198*
		-33.5	0.184*	0.16*	0.078*	0.058*	0.322	0.036	-0.082	0.016	0.098*
		-33.4	0.184*	0.26*	0.078*	0.058*	0.222	0.036	0.018	0.016	0.098*
		-33.3	0.084*	0.26*	0.078*	0.058*	0.222	0.036	-0.082	-0.084	0.198*
		-33.2	0.184*	0.16*	0.078*	-0.042*	0.222	0.136	-0.082	-0.084	0.198*
		-33.1	0.184*	0.16*	-0.022*	0.058*	0.222	0.136	-0.082	-0.084	0.298*
		-33	0.184*	0.16*	-0.022*	0.058*	0.122	0.036	0.018	0.016	0.298*
		-32.9	0.184*	0.16*	0.078*	0.058*	0.122	0.036	0.018	0.016	0.198*
		-32.8	0.184*	0.16*	0.078*	0.058*	0.122	0.036	0.018	0.116	0.198*
		-32.7	0.184*	0.16*	0.078*	0.058*	0.122	0.036	0.018	0.116	0.198*
		-32.6	0.084*	0.16*	0.078*	0.058*	0.122	0.036	-0.082	0.016	0.198*
		-32.5	-0.016*	0.16*	0.078*	0.058*	0.222	0.036	0.018	0.016	0.198*
		-32.4	-0.016*	0.16*	-0.022*	-0.042*	0.222	0.036	0.018	0.016	0.198*
		-32.3	0.084*	0.16*	0.078*	0.158*	0.222	0.036	0.018	0.016	0.198*
		-32.2	0.084*	0.16*	0.178*	0.158*	0.122	0.036	-0.082	-0.084	0.198*
		-32.1	0.184*	0.26*	0.178*	0.158*	0.122	0.036	0.018	0.016	0.198*
		-32	0.184*	0.26*	0.178*	0.058*	0.122	0.036	0.018	0.016	0.198*
		-31.9	0.184*	0.26*	0.178*	0.058*	0.122	0.036	0.018	0.016	0.198*
		-31.8	0.184*	0.26*	0.178*	0.058*	0.222	0.136	0.118	0.016	0.298*
		-31.7	0.084*	0.26*	0.078*	-0.042*	0.122	0.036	0.118	-0.084	0.298*
		-31.6	-0.016*	0.26*	0.078*	-0.042*	0.222	0.036	0.118	0.016	0.298*
		-31.5	-0.016*	0.26*	0.078*	-0.042*	0.222	0.036	0.018	0.016	0.198*
		-31.4	-0.016*	0.16*	0.078*	-0.042*	0.222	0.136	-0.082	-0.084	0.298*
		-31.3	-0.016*	0.16*	0.178*	0.058*	0.222	0.136	-0.082	-0.084	0.198*
		-31.2	0.084*	0.16*	0.178*	0.058*	0.222	0.136	-0.082	-0.084	0.198*
		-31.1	-0.016*	0.06*	0.078*	0.058*	0.122	0.136	0.018	0.016	0.198*
		-31	-0.016*	0.06*	0.078*	0.058*	0.122	0.136	0.018	0.016	0.198*
		-30.9	-0.016*	0.16*	0.078*	0.058*	0.122	0.136	-0.082	-0.084	0.298*
		-30.8	-0.016*	0.16*	0.078*	-0.042*	0.122	0.136	-0.082	-0.084	0.298*
		-30.7	-0.016*	0.16*	0.078*	-0.042*	0.122	0.136	-0.082	-0.084	0.198*
		-30.6	-0.016*	0.16*	0.078*	-0.042*	0.122	0.036	0.018	-0.084	0.198*
		-30.5	-0.016*	0.16*	0.178*	-0.042*	0.122	0.036	0.018	-0.084	0.198*
		-30.4	-0.116*	0.06*	0.178*	-0.042*	0.122	0.136	0.018	-0.084	0.198*
		-30.3	-0.016*	0.16*	0.178*	0.058*	0.022	0.136	0.018	0.016	0.198*
		-30.2	-0.016*	0.26*	0.178*	0.058*	0.022	0.136	0.018	0.016	0.198*
		-30.1	-0.016*	0.26*	0.178*	0.058*	0.022	0.136	-0.082	-0.084	0.198*
		-30	-0.016*	0.26*	0.178*	0.058*	0.122	0.136	-0.082	-0.184	0.198*
		-29.9	-0.016*	0.16*	0.178*	0.058*	0.122	0.136	-0.082	-0.184	0.198*
		-29.8	-0.016*	0.16*	0.078*	0.058*	0.122	0.136	-0.082	-0.184	0.198*
		-29.7	-0.016*	0.16*	0.078*	-0.042*	0.122	0.136	-0.182	-0.184	0.198*
		-29.6	-0.016*	0.16*	0.078*	-0.042*	0.022	0.036	-0.182	-0.184	0.298*
		-29.5	-0.016*	0.16*	0.078*	0.058*	0.022	0.036	-0.082	-0.084	0.298*
		-29.4	-0.116*	0.16*	0.078*	0.058*	0.122	0.136	-0.182	-0.184	0.298*
		-29.3	-0.116*	0.16*	0.078*	0.058*	0.122	0.136	-0.182	-0.184	0.298*
		-29.2	-0.016*	0.16*	0.078*	0.058*	0.122	0.136	-0.182	-0.184	0.298*
		-29.1	-0.016*	0.16*	0.178*	0.058*	0.122	0.136	-0.082	-0.084	0.298*
		-29	-0.016*	0.16*	0.178*	0.058*	0.122	0.136	-0.082	-0.084	0.298*
		-28.9	0.084*	0.26*	0.178*	0.058*	0.122	0.136	-0.082	-0.184	0.298*
		-28.8	-0.016*	0.26*	0.278*	0.058*	0.122	0.136	-0.082	-0.184	0.198*
		-28.7	-0.016*	0.36*	0.278*	0.058*	0.222	0.236	-0.182	-0.184	0.198*
		-28.6	-0.116*	0.26*	0.278*	0.158*	0.222	0.236	-0.182	-0.184	0.198*
		-28.5	-0.116*	0.16*	0.178*	0.158*	0.122	0.136	-0.182	-0.184	0.298*
		-28.4	-0.116*	0.16*	0.078*	0.058*	0.022	0.136	-0.082	-0.184	0.298*
		-28.3	-0.016*	0.16*	0.078*	0.058*	0.022	0.036	-0.082	-0.184	0.298*
		-28.2	-0.016*	0.16*	0.178*	0.058*	0.122	0.036	-0.082	-0.084	0.398*
		-28.1	-0.016*	0.26*	0.178*	0.058*	0.122	0.036	-0.082	-0.084	0.398*
		-28	-0.016*	0.26*	0.178*	0.058*	0.222	0.236	-0.182	-0.084	0.198*
		-27.9	-0.016*	0.26*	0.178*	0.058*	0.222	0.236	-0.182	-0.084	0.198*
		-27.8	-0.016*	0.26*	0.178*	0.158*	0.222	0.236	-0.182	-0.084	0.198*
		-27.7	-0.016*	0.26*	0.178*	0.158*	0.322	0.236	-0.182	0.016	0.198*
		-27.6	-0.016*	0.06*	0.178*	0.158*	0.222	0.136	-0.082	-0.084	0.198*
		-27.5	-0.016*	0.06*	0.278*	0.158*	0.122	0.036	-0.082	-0.084	0.198*
		-27.4	0.084*	0.16*	0.278*	0.058*	0.122	0.036	-0.082	-0.084	0.298*
		-27.3	0.084*	0.16*	0.278*	0.058*	0.122	0.136	-0.082	-0.084	0.398*
		-27.2	0.084*	0.26*	0.178*	0.058*	0.222	0.136	-0.082	0.016	0.398*
		-27.1	0.084*	0.26*	0.178*	0.058*	0.222	0.136	-0.082	-0.084	0.298*
		-27	-0.016*	0.26*	0.278*	0.158*	0.222	0.136	-0.082	-0.084	0.298*
		-26.9	0.084*	0.26*	0.278*	0.158*	0.222	0.136	-0.082	0.016	0.298*
		-26.8	-0.016*	0.16*	0.278*	0.158*	0.222	0.136	-0.082	0.116	0.298*
		-26.7	-0.016*	0.16*	0.178*	0.058*	0.122	0.136	-0.082	0.116	0.398*
		-26.6	-0.016*	0.26*	0.178*	0.058*	0.222	0.136	-0.082	0.116	0.298*
		-26.5	-0.016*	0.26*	0.178*	0.058*	0.222	0.136	0.018	0.116	0.298*
		-26.4	-0.016*	0.16*	0.278*	0.158*	0.222	0.136	0.018	0.116	0.198*
		-26.3	0.084*	0.26*	0.278*	0.258*	0.222	0.136	-0.082	-0.084	0.198*
		-26.2	0.084*	0.26*	0.278*	0.258*	0.222	0.136	-0.082	-0.084	0.198*
		-26.1	0.084*	0.26*	0.178*	0.158*	0.222	0.036	0.018	0.116	0.198*
		-26	-0.016*	0.16*	0.178*	0.158*	0.122	0.036	0.018	0.116	0.198*
		-25.9	-0.016*	0.26*	0.178*	0.158*	0.122	0.136	-0.082	0.116	0.198*
		-25.8	0.084*	0.26*	0.278*	0.258*	0.222	0.236	-0.082	0.016	0.298*
		-25.7	0.084*	0.26*	0.278*	0.158*	0.322	0.236	-0.082	0.016	0.198*
		-25.6	0.084*	0.16*	0.278*	0.158*	0.222	0.036	-0.082	0.016	0.198*
		-25.5	0.084*	0.16*	0.178*	0.158*	0.222	0.036	-0.082	0.016	0.098*
		-25.4	0.084*	0.16*	0.178*	0.058*	0.222	0.036	-0.082	0.016	0.198*
		-25.3	0.084*	0.26*	0.278*	0.158*	0.222	0.036	-0.082	-0.084	0.198*
		-25.2	0.084*	0.26*	0.278*	0.158*	0.222	0.036	0.018	0.016	0.198*
		-25.1	0.084*	0.26*	0.278*	0.158*	0.222	0.036	0.018	0.016	0.198*
		-25	0.084*	0.26*	0.278*	0.258*	0.122	0.036	0.018	0.016	0.098*
		-24.9	-0.016*	0.16*	0.278*	0.258*	0.322	0.136	0.018	0.016	0.198*
		-24.8	0.084*	0.26*	0.278*	0.158*	0.322	0.136	0.018	0.016	0.198*
		-24.7	0.184*	0.36*	0.178*	0.058*	0.222	0.136	0.018	0.016	0.198*
		-24.6	0.184*	0.36*	0.278*	0.158*	0.122	0.036	-0.182	-0.084	0.198*
		-24.5	0.084*	0.36*	0.278*	0.158*	0.122	0.036	-0.182	-0.084	0.198*
		-24.4	-0.016*	0.16*	0.278*	0.158*	0.122	-0.064	-0.182	-0.084	0.098*
		-24.3	0.084*	0.16*	0.178*	0.058*	0.122	-0.064	0.018	0.016	0.098*
		-24.2	0.084*	0.16*	0.178*	0.058*	0.022	-0.164	-0.082	-0.084	0.198*
		-24.1	0.084*	0.16*	0.178*	0.158*	0.022	-0.164	-0.082	-0.184	0.198*
		-24	0.084*	0.16*	0.178*	0.158*	0.022	-0.164	-0.082	-0.084	0.098*
		-23.9	0.084*	0.26*	0.278*	0.158*	0.022	-0.164	-0.082	-0.084	0.098*
		-23.8	0.084*	0.26*	0.278*	0.158*	0.022	-0.064	-0.082	-0.084	0.098*
		-23.7	0.184*	0.26*	0.178*	0.058*	0.022	-0.064	-0.182	-0.184	0.098*
		-23.6	0.184*	0.26*	0.278*	0.158*	0.022	-0.064	-0.182	-0.184	-0.002*
		-23.5	0.084*	0.26*	0.278*	0.058*	0.022	-0.064	-0.282	-0.184	-0.002*
		-23.4	0.084*	0.26*	0.278*	0.058*	-0.078	-0.164	-0.282	-0.184	-0.002*
		-23.3	-0.016*	0.16*	0.278*	0.058*	-0.178	-0.164	-0.282	-0.184	-0.002*
		-23.2	-0.016*	0.16*	0.178*	-0.042*	-0.078	-0.164	-0.182	-0.284	-0.002*
		-23.1	-0.016*	0.06*	0.078*	-0.042*	-0.078	-0.264	-0.282	-0.384	-0.002*
		-23	-0.016*	0.06*	0.078*	-0.042*	-0.078	-0.264	-0.282	-0.384	0.098*
		-22.9	-0.016*	0.06*	0.078*	-0.042*	-0.078	-0.264	-0.282	-0.384	0.098*
		-22.8	-0.016*	0.06*	0.078*	-0.042*	-0.078	-0.264	-0.182	-0.284	0.098*
		-22.7	0.184*	0.26*	0.078*	0.058*	-0.078	-0.164	-0.182	-0.284	-0.002*
		-22.6	0.184*	0.26*	0.078*	0.058*	-0.078	-0.164	-0.182	-0.184	-0.102*
		-22.5	0.184*	0.26*	0.178*	0.158*	-0.078	-0.164	-0.182	-0.184	-0.102*
		-22.4	0.184*	0.26*	0.278*	0.058*	-0.078	-0.164	-0.182	-0.184	-0.002*
		-22.3	0.084*	0.26*	0.278*	0.058*	-0.078	-0.164	-0.082	-0.184	-0.002*
		-22.2	0.084*	0.26*	0.178*	-0.042*	-0.078	-0.164	-0.182	-0.284	-0.002*
		-22.1	0.084*	0.16*	0.078*	-0.042*	-0.078	-0.164	-0.182	-0.284	-0.002*
		-22	-0.016*	0.06*	0.078*	-0.042*	-0.078	-0.264	-0.282	-0.384	-0.002*
		-21.9	-0.016*	0.06*	0.078*	-0.042*	-0.078	-0.264	-0.282	-0.384	-0.102*
		-21.8	-0.016*	0.06*	0.078*	-0.042*	-0.078	-0.264	-0.282	-0.284	-0.102*
		-21.7	-0.016*	0.06*	0.078*	-0.042*	-0.078	-0.264	-0.282	-0.284	-0.102*
		-21.6	-0.016*	0.06*	0.078*	-0.042*	-0.078	-0.264	-0.282	-0.284	-0.002*
		-21.5	0.084*	0.06*	0.078*	-0.042*	-0.078	-0.264	-0.182	-0.184	-0.002*
		-21.4	0.084*	0.06*	0.078*	-0.042*	-0.078	-0.264	-0.182	-0.184	-0.002*
		-21.3	0.084*	0.16*	0.178*	-0.042*	-0.078	-0.264	-0.182	-0.184	-0.002*
		-21.2	0.084*	0.16*	0.178*	0.058*	-0.078	-0.264	-0.182	-0.184	-0.002*
		-21.1	-0.016*	0.16*	0.078*	-0.042*	-0.078	-0.264	-0.082	-0.184	-0.002*
		-21	-0.016*	0.16*	0.078*	-0.042*	-0.178	-0.264	-0.082	-0.184	-0.002*
		-20.9	-0.016*	0.16*	0.078*	-0.042*	-0.078	-0.164	-0.082	-0.184	-0.102*
		-20.8	-0.016*	0.06*	0.178*	0.058*	-0.078	-0.164	-0.082	-0.184	-0.202*
		-20.7	-0.016*	0.06*	0.178*	-0.042*	-0.078	-0.164	-0.182	-0.184	-0.202*
		-20.6	-0.016*	0.06*	0.178*	-0.042*	-0.078	-0.164	-0.182	-0.184	-0.202*
		-20.5	-0.016*	0.06*	0.178*	-0.042*	-0.078	-0.164	-0.082	-0.184	-0.102*
		-20.4	-0.016*	0.06*	0.178*	0.058*	-0.078	-0.264	-0.082	-0.184	-0.002*
		-20.3	-0.016*	0.06*	0.078*	-0.042*	-0.078	-0.164	-0.182	-0.184	-0.002*
		-20.2	0.084*	0.16*	0.078*	-0.042*	-0.178	-0.264	-0.182	-0.184	-0.002*
		-20.1	0.084*	0.16*	0.078*	-0.042*	-0.178	-0.264	-0.182	-0.184	-0.002*
		-20	0.084*	0.16*	0.078*	-0.042*	-0.178	-0.264	-0.182	-0.184	-0.102*
		-19.9	0.084*	0.16*	0.078*	-0.042*	-0.078	-0.264	-0.182	-0.184	-0.102*
		-19.8	0.084*	0.06*	0.078*	-0.042*	-0.078	-0.264	-0.182	-0.184	-0.102*
		-19.7	0.084*	0.06*	0.078*	-0.042*	-0.178	-0.264	-0.082	-0.084	-0.202*
		-19.6	0.084*	0.06*	0.078*	-0.042*	-0.178	-0.264	-0.082	-0.084	-0.102*
		-19.5	0.084*	0.16*	0.078*	-0.042*	-0.178	-0.264	0.018	-0.084	-0.102*
		-19.4	0.084*	0.16*	0.078*	-0.042*	-0.178	-0.264	-0.082	-0.084	-0.102*
		-19.3	0.084*	0.16*	-0.022*	-0.142*	-0.178	-0.264	-0.082	-0.084	-0.002*
		-19.2	0.084*	0.16*	-0.022*	-0.142*	-0.178	-0.264	0.018	-0.084	-0.002*
		-19.1	-0.016*	0.16*	0.078*	-0.142*	-0.178	-0.264	0.018	-0.084	-0.002*
		-19	-0.016*	0.16*	0.078*	-0.142*	-0.178	-0.264	0.018	-0.084	-0.002*
		-18.9	-0.016*	0.16*	0.178*	-0.142*	-0.178	-0.264	0.118	0.016	-0.002*
		-18.8	-0.116*	0.06*	0.078*	-0.142*	-0.178	-0.264	0.018	-0.084	-0.002*
		-18.7	-0.116*	0.06*	0.078*	-0.142*	-0.178	-0.264	0.018	-0.084	-0.002*
		-18.6	-0.016*	0.16*	0.078*	-0.142*	-0.178	-0.264	0.018	-0.084	-0.002*
		-18.5	-0.016*	0.16*	-0.022*	-0.242*	-0.178	-0.264	0.018	-0.084	-0.002*
		-18.4	-0.016*	0.16*	-0.022*	-0.242*	-0.178	-0.364	0.018	-0.084	-0.002*
		-18.3	-0.016*	0.16*	-0.022*	-0.242*	-0.178	-0.364	0.018	-0.084	0.098*
		-18.2	-0.016*	0.16*	-0.022*	-0.242*	-0.278	-0.464	0.018	-0.084	-0.002*
		-18.1	-0.016*	0.16*	-0.022*	-0.242*	-0.278	-0.464	0.018	-0.084	-0.002*
		-18	-0.016*	0.16*	-0.122*	-0.242*	-0.278	-0.464	0.018	-0.084	-0.002*
		-17.9	-0.016*	0.16*	-0.122*	-0.242*	-0.278	-0.464	0.018	-0.084	-0.002*
		-17.8	-0.016*	0.16*	-0.122*	-0.242*	-0.278	-0.464	0.018	-0.084	-0.002*
		-17.7	-0.016*	0.16*	-0.122*	-0.242*	-0.178	-0.364	-0.082	-0.084	-0.002*
		-17.6	-0.016*	0.16*	-0.122*	-0.242*	-0.178	-0.364	-0.082	-0.084	-0.002*
		-17.5	-0.016*	0.16*	-0.122*	-0.242*	-0.178	-0.364	-0.082	-0.084	-0.002*
		-17.4	-0.016*	0.16*	-0.122*	-0.242*	-0.278	-0.364	0.018	0.016	-0.002*
		-17.3	-0.016*	0.16*	-0.122*	-0.242*	-0.278	-0.364	0.018	0.016	-0.002*
		-17.2	-0.016*	0.16*	-0.122*	-0.242*	-0.278	-0.364	0.018	0.016	-0.002*
		-17.1	-0.016*	0.16*	-0.022*	-0.142*	-0.278	-0.364	0.018	0.016	-0.002*
		-17	-0.016*	0.16*	-0.022*	-0.142*	-0.278	-0.364	0.018	0.016	-0.002*
		-16.9	-0.016*	0.16*	-0.022*	-0.142*	-0.278	-0.364	0.018	0.016	-0.002*
		-16.8	-0.016*	0.06*	-0.022*	-0.142*	-0.278	-0.364	0.018	0.016	-0.002*
		-16.7	-0.016*	0.06*	-0.022*	-0.142*	-0.378	-0.364	0.018	0.016	-0.002*
		-16.6	-0.016*	0.06*	-0.022*	-0.142*	-0.178	-0.264	0.018	-0.084	-0.002*
		-16.5	-0.016*	0.06*	-0.022*	-0.142*	-0.178	-0.264	0.018	-0.084	-0.002*
		-16.4	0.084*	0.16*	-0.022*	-0.142*	-0.178	-0.264	0.018	-0.084	-0.002*
		-16.3	0.084*	0.16*	-0.022*	-0.142*	-0.178	-0.364	0.018	-0.184	-0.002*
		-16.2	0.084*	0.16*	-0.022*	-0.142*	-0.178	-0.364	0.018	-0.184	-0.002*
		-16.1	0.084*	0.16*	-0.022*	-0.142*	-0.178	-0.364	0.018	-0.184	-0.002*
		-16	0.084*	0.16*	-0.022*	-0.142*	-0.178	-0.364	-0.082	-0.184	0.098*
		-15.9	0.084*	0.16*	-0.022*	-0.142*	-0.178	-0.264	0.018	-0.084	0.098*
		-15.8	0.084*	0.16*	-0.122*	-0.142*	-0.178	-0.364	0.018	-0.084	0.098*
		-15.7	-0.016*	0.16*	-0.122*	-0.142*	-0.178	-0.364	0.018	-0.084	0.098*
		-15.6	-0.016*	0.16*	-0.122*	-0.142*	-0.178	-0.364	0.018	-0.084	0.098*
		-15.5	-0.016*	0.06*	-0.122*	-0.242*	-0.178	-0.364	0.018	-0.084	0.098*
		-15.4	-0.016*	0.06*	-0.122*	-0.242*	-0.178	-0.364	0.018	-0.084	0.098*
		-15.3	-0.016*	0.06*	-0.122*	-0.242*	-0.178	-0.364	0.018	-0.084	0.098*
		-15.2	-0.016*	0.06*	-0.122*	-0.242*	-0.178	-0.364	0.018	-0.084	0.098*
		-15.1	-0.016*	0.06*	-0.122*	-0.242*	-0.178	-0.364	0.018	-0.084	0.198*
		-15	-0.016*	0.06*	-0.122*	-0.242*	-0.278	-0.364	0.018	-0.084	0.198*
		-14.9	-0.016*	0.06*	-0.122*	-0.242*	-0.278	-0.364	0.018	-0.084	0.198*
		-14.8	-0.016*	0.06*	-0.222*	-0.242*	-0.278	-0.364	-0.082	-0.084	0.198*
		-14.7	-0.016*	0.06*	-0.222*	-0.242*	-0.278	-0.364	0.018	-0.084	0.198*
		-14.6	-0.016*	0.06*	-0.222*	-0.242*	-0.278	-0.364	-0.082	-0.084	0.098*
		-14.5	-0.016*	0.06*	-0.222*	-0.242*	-0.278	-0.364	0.018	0.016	0.098*
		-14.4	-0.016*	0.06*	-0.222*	-0.242*	-0.178	-0.264	0.118	0.016	0.098*
		-14.3	-0.016*	0.06*	-0.222*	-0.242*	-0.178	-0.264	0.118	0.016	0.198*
		-14.2	-0.016*	0.06*	-0.222*	-0.142*	-0.178	-0.164	0.118	0.016	0.198*
		-14.1	-0.016*	0.06*	-0.222*	-0.142*	-0.178	-0.164	0.118	0.016	0.198*
		-14	-0.016*	0.06*	-0.222*	-0.142*	-0.178	-0.164	0.118	0.016	0.198*
		-13.9	-0.116*	0.06*	-0.122*	-0.142*	-0.078	-0.064	0.018	0.016	0.198*
		-13.8	-0.116*	0.06*	-0.122*	-0.142*	-0.178	-0.064	0.018	0.016	0.098*
		-13.7	-0.016*	0.16*	-0.122*	-0.142*	-0.178	-0.064	-0.082	-0.084	0.098*
		-13.6	-0.016*	0.06*	-0.122*	-0.142*	-0.178	-0.064	-0.082	-0.084	0.098*
		-13.5	-0.116*	0.06*	-0.122*	-0.142*	-0.178	-0.064	-0.082	-0.084	0.098*
		-13.4	-0.116*	-0.04*	-0.122*	-0.142*	-0.178	-0.064	-0.082	-0.084	0.098*
		-13.3	-0.116*	-0.04*	-0.122*	-0.142*	-0.178	-0.064	-0.082	-0.084	0.098*
		-13.2	-0.116*	-0.04*	-0.222*	-0.142*	-0.178	-0.064	0.018	0.016	0.098*
		-13.1	-0.116*	-0.04*	-0.222*	-0.142*	-0.178	-0.064	0.018	0.016	-0.002*
		-13	-0.116*	-0.04*	-0.222*	-0.142*	-0.178	-0.064	0.018	0.016	-0.002*
		-12.9	-0.016*	-0.14*	-0.222*	-0.142*	-0.178	-0.064	0.018	0.016	-0.002*
		-12.8	-0.016*	-0.14*	-0.222*	-0.142*	-0.078	-0.064	0.018	0.016	-0.002*
		-12.7	-0.016*	-0.14*	-0.222*	-0.242*	-0.078	-0.164	0.018	0.016	-0.002*
		-12.6	-0.016*	-0.14*	-0.222*	-0.242*	-0.078	-0.164	0.018	0.016	-0.002*
		-12.5	-0.016*	-0.14*	-0.222*	-0.242*	0.022	-0.064	0.018	0.016	-0.002*
		-12.4	-0.016*	-0.14*	-0.222*	-0.242*	0.022	-0.064	0.018	0.016	-0.002*
		-12.3	-0.016*	-0.14*	-0.222*	-0.242*	0.022	-0.064	0.018	0.016	-0.002*
		-12.2	-0.016*	-0.14*	-0.222*	-0.242*	-0.078	-0.064	0.018	0.016	-0.002*
		-12.1	-0.016*	-0.14*	-0.222*	-0.242*	-0.078	-0.064	0.018	0.016	0.098*
		-12	-0.016*	-0.14*	-0.222*	-0.242*	-0.078	-0.064	0.018	0.016	0.098*
		-11.9	-0.016*	-0.14*	-0.222*	-0.342*	-0.178	-0.164	0.018	0.016	-0.002*
		-11.8	-0.016*	-0.14*	-0.222*	-0.342*	-0.178	-0.164	0.118	0.116	-0.002*
		-11.7	-0.116*	-0.14*	-0.222*	-0.342*	-0.178	-0.164	0.118	0.116	-0.002*
		-11.6	-0.116*	-0.14*	-0.222*	-0.342*	-0.178	-0.164	0.118	0.116	-0.002*
		-11.5	-0.116*	-0.14*	-0.122*	-0.242*	-0.178	-0.164	0.118	0.116	-0.002*
		-11.4	-0.116*	-0.14*	-0.122*	-0.242*	-0.178	-0.164	0.118	0.116	-0.002*
		-11.3	-0.116*	-0.14*	-0.122*	-0.242*	-0.078	-0.064	0.118	0.116	-0.002*
		-11.2	-0.116*	-0.14*	-0.122*	-0.242*	-0.078	-0.064	0.118	0.116	0.098*
		-11.1	-0.116*	-0.14*	-0.122*	-0.242*	-0.078	-0.064	0.118	0.116	0.098*
		-11	-0.016*	-0.04*	-0.122*	-0.242*	-0.078	-0.064	0.118	0.116	0.098*
		-10.9	-0.016*	-0.04*	-0.122*	-0.242*	-0.078	-0.064	0.118	0.116	0.098*
		-10.8	-0.016*	-0.04*	-0.122*	-0.242*	-0.078	-0.064	0.118	0.116	0.098*
		-10.7	-0.016*	-0.04*	-0.122*	-0.242*	-0.078	-0.064	0.118	0.116	0.098*
		-10.6	-0.016*	-0.04*	-0.122*	-0.242*	-0.078	-0.064	0.018	0.116	0.098*
		-10.5	-0.016*	-0.04*	-0.122*	-0.242*	-0.078	-0.064	0.018	0.116	0.098*
		-10.4	-0.016*	-0.04*	-0.222*	-0.242*	-0.078	-0.164	0.018	0.016	0.098*
		-10.3	-0.016*	-0.04*	-0.222*	-0.242*	-0.078	-0.164	0.018	0.016	-0.002*
		-10.2	-0.016*	-0.04*	-0.222*	-0.242*	-0.078	-0.164	-0.082	-0.084	0.098*
		-10.1	-0.016*	-0.04*	-0.222*	-0.242*	0.022	-0.064	-0.082	-0.084	-0.002*
		-10	-0.016*	-0.04*	-0.222*	-0.242*	0.022	-0.064	-0.082	-0.084	-0.002*
		-9.9	-0.016*	-0.04*	-0.122*	-0.142*	0.022	-0.064	-0.082	-0.084	-0.002*
		-9.8	-0.016*	-0.04*	-0.122*	-0.142*	0.022	-0.064	-0.082	-0.084	-0.002*
		-9.7	-0.016*	-0.04*	-0.022*	-0.142*	0.022	-0.064	-0.082	-0.084	-0.002*
		-9.6	-0.016*	-0.04*	-0.122*	-0.142*	0.022	-0.064	-0.082	-0.084	-0.002*
		-9.5	-0.016*	-0.04*	-0.122*	-0.142*	0.022	-0.064	-0.082	-0.084	-0.002*
		-9.4	-0.016*	-0.04*	-0.122*	-0.142*	0.022	-0.064	-0.082	-0.084	-0.002*
		-9.3	-0.016*	-0.04*	-0.122*	-0.142*	0.022	-0.064	0.018	0.016	-0.002*
		-9.2	0.084*	0.06*	-0.122*	-0.142*	0.022	-0.064	0.018	0.016	-0.002*
		-9.1	0.084*	0.06*	-0.122*	-0.142*	0.022	-0.064	-0.082	0.016	-0.002*
		-9	0.084*	0.06*	-0.122*	-0.142*	0.022	-0.064	-0.082	0.016	-0.002*
		-8.9	0.084*	0.06*	-0.122*	-0.142*	0.022	-0.064	0.018	0.016	-0.002*
		-8.8	-0.016*	0.06*	-0.122*	-0.142*	0.022	-0.064	0.018	0.016	-0.002*
		-8.7	-0.016*	-0.04*	-0.122*	-0.142*	0.022	-0.064	0.018	0.016	-0.002*
		-8.6	-0.016*	-0.04*	-0.122*	-0.142*	-0.078	-0.164	0.018	0.016	-0.002*
		-8.5	-0.016*	-0.04*	-0.022*	-0.042*	-0.078	-0.164	0.018	0.016	-0.002*
		-8.4	-0.016*	-0.04*	-0.022*	-0.042*	-0.078	-0.164	0.018	0.016	-0.002*
		-8.3	-0.016*	-0.04*	-0.022*	-0.042*	-0.078	-0.164	0.018	0.016	-0.002*
		-8.2	-0.016*	-0.04*	-0.022*	-0.042*	-0.078	-0.164	0.018	0.016	0.098*
		-8.1	-0.016*	-0.04*	-0.022*	-0.042*	-0.078	-0.164	0.018	0.016	-0.002*
		-8	-0.016*	-0.04*	-0.022*	-0.042*	-0.078	-0.164	0.018	0.016	-0.002*
		-7.9	-0.016*	-0.04*	-0.022*	-0.042*	-0.078	-0.164	0.018	0.016	-0.002*
		-7.8	-0.016*	-0.04*	-0.022*	-0.042*	-0.078	-0.064	0.018	0.016	-0.002*
		-7.7	-0.016*	-0.04*	-0.022*	-0.042*	-0.078	-0.064	0.018	0.016	-0.002*
		-7.6	-0.016*	-0.04*	-0.022*	0.058*	-0.078	-0.064	0.018	0.016	-0.002*
		-7.5	-0.016*	-0.04*	-0.022*	0.058*	-0.078	0.036	0.018	0.016	-0.002*
		-7.4	-0.016*	-0.04*	-0.022*	0.058*	-0.078	0.036	0.018	0.016	-0.002*
		-7.3	-0.016*	-0.04*	-0.022*	0.058*	-0.078	0.036	0.018	0.016	-0.002*
		-7.2	-0.016*	-0.04*	-0.022*	0.058*	-0.078	0.036	0.018	0.016	-0.002*
		-7.1	-0.016*	-0.04*	-0.022*	0.058*	-0.078	0.036	0.018	0.016	-0.002*
		-7	-0.016*	-0.04*	-0.022*	0.058*	-0.078	0.036	0.018	0.016	-0.002*
		-6.9	-0.016*	-0.04*	-0.022*	0.058*	0.022	0.136	0.018	0.016	-0.002*
		-6.8	-0.016*	-0.04*	-0.022*	0.058*	-0.078	0.036	0.018	0.016	-0.002*
		-6.7	-0.016*	-0.04*	-0.022*	0.058*	-0.078	0.036	0.018	-0.084	-0.002*
		-6.6	-0.016*	-0.04*	-0.022*	0.058*	-0.078	0.036	0.018	-0.084	-0.002*
		-6.5	-0.016*	-0.04*	-0.022*	0.058*	-0.078	0.036	0.018	0.016	-0.002*
		-6.4	-0.016*	-0.04*	0.078*	0.058*	0.022	0.136	0.018	0.016	-0.002*
		-6.3	-0.016*	-0.04*	0.078*	0.058*	0.022	0.136	0.018	0.016	-0.002*
		-6.2	-0.016*	-0.04*	0.178*	0.158*	0.122	0.136	0.018	0.016	-0.002*
		-6.1	-0.016*	-0.04*	0.178*	0.158*	0.122	0.136	0.018	0.016	-0.002*
		-6	-0.016*	-0.04*	0.178*	0.158*	0.122	0.136	0.018	0.116	-0.002*
		-5.9	-0.016*	-0.04*	0.178*	0.158*	0.122	0.136	0.018	0.016	-0.002*
		-5.8	0.084*	0.06*	0.178*	0.158*	0.122	0.136	0.018	0.016	-0.002*
		-5.7	0.084*	0.16*	0.178*	0.158*	0.122	0.136	0.018	0.016	-0.002*
		-5.6	0.084*	0.16*	0.178*	0.158*	0.122	0.136	0.018	0.016	-0.002*
		-5.5	-0.016*	0.16*	0.178*	0.158*	0.122	0.136	0.018	0.016	-0.002*
		-5.4	-0.016*	0.16*	0.178*	0.158*	0.122	0.136	0.018	0.016	-0.002*
		-5.3	-0.016*	0.16*	0.178*	0.158*	0.122	0.136	0.018	0.016	-0.002*
		-5.2	-0.016*	0.16*	0.178*	0.158*	0.022	0.136	0.018	0.016	-0.002*
		-5.1	0.084*	0.16*	0.178*	0.058*	0.022	0.136	0.018	0.016	-0.002*
		-5	0.084*	0.16*	0.178*	0.058*	0.022	0.136	0.018	0.016	-0.002*
		-4.9	0.084*	0.16*	0.178*	0.058*	0.022	0.136	0.118	0.116	-0.002*
		-4.8	0.084*	0.16*	0.178*	0.158*	0.022	0.136	0.118	0.116	-0.002*
		-4.7	0.084*	0.16*	0.178*	0.158*	0.022	0.136	0.118	0.116	-0.002*
		-4.6	0.084*	0.06*	0.078*	0.158*	0.022	0.136	0.118	0.116	-0.002*
		-4.5	0.084*	0.06*	0.078*	0.158*	0.022	0.136	0.118	0.116	-0.002*
		-4.4	0.084*	0.06*	0.078*	0.158*	-0.078	0.036	0.118	0.116	-0.002*
		-4.3	0.084*	0.06*	0.078*	0.158*	0.022	0.136	0.118	0.116	-0.002*
		-4.2	0.084*	0.06*	0.078*	0.158*	0.022	0.136	0.118	0.116	-0.002*
		-4.1	0.084*	0.06*	0.078*	0.158*	0.022	0.136	0.118	0.116	-0.002*
		-4	0.084*	0.06*	0.078*	0.158*	-0.078	0.036	0.118	0.116	-0.002*
		-3.9	0.084*	0.06*	0.078*	0.158*	0.022	0.136	0.118	0.116	-0.102*
		-3.8	0.084*	0.06*	0.078*	0.158*	0.122	0.136	0.218	0.216	-0.002*
		-3.7	0.084*	0.06*	0.078*	0.158*	0.022	0.036	0.218	0.216	-0.002*
		-3.6	0.084*	0.06*	0.078*	0.158*	-0.078	0.036	0.218	0.216	-0.002*
		-3.5	0.184*	0.16*	0.078*	0.158*	-0.078	0.036	0.218	0.216	-0.002*
		-3.4	0.084*	0.16*	0.078*	0.158*	-0.078	0.036	0.218	0.216	-0.002*
		-3.3	0.084*	0.16*	0.078*	0.158*	0.022	0.136	0.218	0.216	-0.002*
		-3.2	0.084*	0.16*	0.078*	0.158*	0.022	0.136	0.318	0.316	-0.002*
		-3.1	0.084*	0.16*	0.078*	0.158*	0.022	0.136	0.318	0.316	-0.002*
		-3	0.084*	0.16*	0.078*	0.158*	0.022	0.036	0.218	0.316	-0.002*
		-2.9	0.084*	0.16*	0.078*	0.158*	0.022	0.036	0.218	0.316	-0.002*
		-2.8	0.084*	0.16*	0.078*	0.058*	0.022	0.036	0.218	0.316	-0.002*
		-2.7	0.084*	0.16*	0.078*	0.058*	0.022	0.036	0.218	0.316	-0.002*
		-2.6	0.084*	0.16*	0.078*	0.058*	0.122	0.036	0.218	0.316	-0.002*
		-2.5	0.084*	0.16*	0.078*	-0.042*	0.122	0.036	0.218	0.316	-0.002*
		-2.4	0.084*	0.16*	-0.022*	-0.042*	0.122	0.036	0.218	0.216	-0.002*
		-2.3	0.084*	0.16*	-0.022*	-0.042*	0.222	0.036	0.218	0.216	0.098*
		-2.2	0.084*	0.16*	-0.022*	-0.042*	0.122	0.036	0.218	0.216	0.098*
		-2.1	0.184*	0.26*	-0.022*	-0.042*	0.022	0.036	0.218	0.116	-0.002*
		-2	0.184*	0.26*	-0.022*	0.058*	0.022	0.036	0.218	0.216	-0.002*
		-1.9	0.184*	0.26*	-0.022*	-0.042*	0.022	0.036	0.218	0.116	-0.002*
		-1.8	0.184*	0.26*	-0.022*	-0.042*	0.022	0.036	0.218	0.116	-0.002*
		-1.7	0.084*	0.26*	-0.022*	-0.042*	0.022	0.036	0.318	0.216	0.098*
		-1.6	0.084*	0.26*	-0.022*	-0.042*	0.022	0.036	0.318	0.216	-0.002*
		-1.5	0.084*	0.16*	-0.122*	-0.142*	0.022	0.136	0.318	0.216	-0.002*
		-1.4	0.084*	0.16*	-0.022*	-0.142*	0.022	0.136	0.318	0.116	-0.002*
		-1.3	0.084*	0.16*	-0.022*	-0.142*	0.022	0.136	0.318	0.116	-0.002*
		-1.2	0.084*	0.16*	-0.022*	-0.142*	0.122	0.136	0.218	0.116	-0.102*
		-1.1	0.084*	0.26*	-0.022*	-0.142*	0.122	0.236	0.218	0.116	0.098*
		-1	0.084*	0.26*	-0.022*	-0.042*	0.022	0.036	0.018	0.016	-0.002*
		-0.9	-0.016*	0.16*	-0.222*	-0.042*	-0.078	-0.164	0.118	0.016	-0.102*
		-0.8	-1.116*	-1.24*	-0.022*	-0.042*	0.322	0.936	0.318	0.816	0.398*
		-0.7	-1.316*	-1.24*	0.178*	-0.342*	0.722	1.136	0.518	1.216	0.198*
		-0.6	-0.216*	-0.34*	0.178*	0.058*	0.022	0.336	0.518	0.916	-0.002*
		-0.5	-0.216*	-0.14*	0.678*	0.158*	0.022	0.436	0.518	0.516	0.198*
		-0.4	-0.016*	-0.04*	0.778*	-0.142*	-0.078	0.536	0.518	0.716	0.398*
		-0.3	-0.216*	0.06*	0.078*	0.058*	-0.178	0.236	0.318	0.216	0.398*
		-0.2	0.084*	0.36*	-0.022*	-0.442*	0.022	0.136	0.518	0.616	0.398*
		-0.1	0.984*	1.26*	0.278*	0.058*	-0.178	-0.264	0.418	0.116	-0.202*
		0	2.784*	2.66*	0.478*	0.558*	0.622	-2.764	0.518	-2.384	-2.802*
		0.1	4.384*	4.36*	0.378*	0.758*	0.122	-5.464	0.318	-4.684	-5.602*
		0.2	4.584*	5.16*	0.278*	0.058*	-0.678	-5.164	0.018	-4.084	-4.802*
		0.3	3.584*	4.16*	-0.022*	-0.142*	-0.778	-4.364	0.318	-3.284	-4.002*
		0.4	2.684*	3.36*	0.278*	0.058*	-0.278	-3.364	0.018	-2.784	-3.202*
		0.5	2.084*	2.36*	-0.222*	-0.042*	-0.478	-2.464	0.818	-1.484	-2.702*
		0.6	1.784*	1.96*	0.078*	0.058*	0.122	-1.664	0.918	-0.984	-1.902*
		0.7	1.584*	1.96*	0.678*	0.458*	0.122	-1.264	0.718	-0.284	-1.502*
		0.8	1.284*	1.76*	0.278*	-0.042*	0.222	-0.564	1.418	0.816	-1.202*
		0.9	1.184*	1.46*	0.378*	0.658*	0.422	-0.164	1.418	1.316	-0.902*
		1	1.184*	1.56*	0.178*	0.658*	0.622	0.236	1.618	1.616	-0.402*
		1.1	1.084*	1.56*	0.178*	0.558*	0.622	0.236	1.718	2.216	-0.502*
		1.2	1.084*	1.36*	0.178*	0.458*	0.722	0.736	2.018	2.516	-0.502*
		1.3	0.984*	1.16*	0.678*	0.658*	0.722	0.936	2.018	2.816	-0.302*
		1.4	0.684*	0.96*	0.378*	0.458*	1.022	0.936	2.518	3.416	-0.202*
		1.5	0.784*	1.06*	0.378*	0.358*	0.722	1.036	2.618	3.816	-0.402*
		1.6	0.784*	1.06*	0.478*	0.458*	0.922	1.036	2.718	3.916	-0.502*
		1.7	0.884*	1.16*	0.578*	0.558*	1.022	1.236	3.018	4.316	-0.302*
		1.8	0.784*	1.16*	0.678*	0.758*	1.122	1.336	3.018	4.516	-0.202*
		1.9	0.784*	1.06*	0.678*	0.658*	1.222	1.436	3.018	4.716	-0.002*
		2	0.684*	0.86*	0.678*	0.758*	1.222	1.536	3.118	4.916	-0.002*
		2.1	0.684*	0.76*	0.678*	0.658*	1.422	1.836	3.218	5.116	0.098*
		2.2	0.584*	0.86*	0.778*	0.758*	1.322	1.936	3.418	5.416	-0.002*
		2.3	0.484*	0.66*	0.678*	0.758*	1.422	1.936	3.518	5.516	-0.002*
		2.4	0.584*	0.76*	0.778*	0.958*	1.522	1.936	3.618	5.616	-0.102*
		2.5	0.684*	0.86*	0.878*	0.958*	1.622	2.236	3.918	5.816	0.098*
		2.6	0.684*	0.96*	0.778*	1.058*	1.622	2.336	4.018	6.116	-0.002*
		2.7	0.684*	0.86*	0.878*	1.158*	1.722	2.236	4.218	6.316	0.098*
		2.8	0.784*	0.86*	0.878*	1.058*	1.722	2.336	4.218	6.316	0.198*
		2.9	0.684*	0.86*	0.878*	1.058*	1.822	2.536	4.118	6.516	0.298*
		3	0.684*	0.96*	0.878*	1.058*	1.822	2.636	4.318	6.716	0.298*
		3.1	0.584*	0.86*	0.878*	0.958*	1.822	2.736	4.318	6.816	0.198*
		3.2	0.484*	0.76*	0.978*	1.058*	1.822	2.736	4.518	6.816	0.398*
		3.3	0.484*	0.76*	0.878*	0.958*	1.822	2.736	4.618	7.016	0.298*
		3.4	0.584*	0.96*	0.878*	0.958*	1.822	2.936	4.718	7.116	0.398*
		3.5	0.384*	0.86*	0.878*	0.958*	1.822	2.936	4.718	7.216	0.298*
		3.6	0.484*	0.96*	0.878*	1.058*	1.922	2.936	4.818	7.316	0.298*
		3.7	0.384*	0.76*	0.978*	1.158*	1.722	2.836	4.818	7.416	0.198*
		3.8	0.484*	0.96*	0.978*	1.258*	1.922	2.936	5.018	7.616	0.398*
		3.9	0.484*	0.96*	0.978*	1.158*	1.822	3.036	5.118	7.816	0.398*
		4	0.384*	0.76*	0.978*	1.158*	1.922	3.136	5.318	7.916	0.298*
		4.1	0.384*	0.76*	1.078*	1.258*	1.922	3.036	5.318	8.116	0.298*
		4.2	0.484*	0.86*	0.978*	1.158*	2.022	3.136	5.318	8.216	0.398*
		4.3	0.484*	0.86*	0.978*	1.158*	1.922	3.136	5.418	8.416	0.298*
		4.4	0.484*	0.76*	0.978*	1.158*	2.022	3.236	5.418	8.416	0.298*
		4.5	0.484*	0.76*	0.978*	1.158*	1.922	3.236	5.618	8.416	0.298*
		4.6	0.584*	0.86*	0.978*	1.158*	2.022	3.336	5.518	8.416	0.298*
		4.7	0.484*	0.66*	0.978*	1.158*	2.222	3.436	5.718	8.516	0.298*
		4.8	0.584*	0.76*	0.978*	1.158*	2.222	3.436	5.818	8.616	0.298*
		4.9	0.584*	0.76*	0.978*	1.058*	2.222	3.436	5.718	8.516	0.198*
		5	0.584*	0.76*	1.078*	1.058*	2.222	3.636	5.718	8.516	0.298*
		5.1	0.584*	0.86*	0.878*	1.058*	2.322	3.736	5.918	8.816	0.298*
		5.2	0.584*	0.86*	0.878*	1.058*	2.322	3.736	5.918	8.716	0.298*
		5.3	0.584*	0.86*	0.878*	1.058*	2.322	3.636	6.018	8.916	0.298*
		5.4	0.484*	0.66*	0.878*	1.158*	2.322	3.736	6.118	9.016	0.098*
		5.5	0.384*	0.66*	0.878*	1.158*	2.422	3.836	6.118	9.116	0.298*
		5.6	0.584*	0.86*	0.878*	1.058*	2.322	3.836	6.218	9.116	0.198*
		5.7	0.584*	0.76*	0.878*	1.158*	2.422	3.836	6.318	9.316	0.198*
		5.8	0.484*	0.76*	1.078*	1.258*	2.522	4.036	6.418	9.316	0.198*
		5.9	0.484*	0.76*	0.878*	1.158*	2.422	3.936	6.318	9.316	0.298*
		6	0.484*	0.76*	0.978*	1.258*	2.522	3.836	6.618	9.516	0.198*
		6.1	0.484*	0.76*	1.078*	1.358*	2.422	3.936	6.518	9.416	0.298*
		6.2	0.484*	0.76*	0.878*	1.258*	2.422	3.836	6.618	9.516	0.098*
		6.3	0.484*	0.76*	1.078*	1.358*	2.422	3.936	6.518	9.516	0.298*
		6.4	0.484*	0.86*	0.978*	1.358*	2.622	4.036	6.618	9.516	0.198*
		6.5	0.284*	0.66*	1.078*	1.258*	2.422	4.036	6.818	9.716	0.098*
		6.6	0.484*	0.86*	0.978*	1.358*	2.622	4.036	6.718	9.716	0.198*
		6.7	0.484*	0.76*	1.078*	1.458*	2.522	4.036	6.718	9.616	0.298*
		6.8	0.384*	0.76*	0.978*	1.258*	2.722	4.236	6.718	9.816	0.298*
		6.9	0.484*	0.86*	1.078*	1.458*	2.522	4.136	6.818	9.716	0.198*
		7	0.284*	0.76*	1.078*	1.358*	2.722	4.336	6.718	9.716	0.298*
		7.1	0.484*	0.86*	0.978*	1.358*	2.722	4.336	6.818	9.816	0.298*
		7.2	0.384*	0.76*	1.078*	1.458*	2.822	4.336	6.818	9.816	0.198*
		7.3	0.384*	0.86*	0.978*	1.358*	2.722	4.336	6.918	9.916	0.098*
		7.4	0.384*	0.86*	1.078*	1.458*	2.822	4.536	6.718	9.816	0.298*
		7.5	0.384*	0.86*	1.078*	1.558*	2.722	4.436	6.818	9.916	0.198*
		7.6	0.384*	0.86*	1.078*	1.358*	2.822	4.436	6.918	9.916	0.298*
		7.7	0.384*	0.76*	1.078*	1.558*	2.722	4.436	6.818	9.816	0.298*
		7.8	0.284*	0.76*	1.078*	1.458*	2.822	4.536	6.918	10.016	0.198*
		7.9	0.384*	0.86*	1.178*	1.558*	2.822	4.536	6.918	9.916	0.298*
		8	0.384*	0.76*	1.178*	1.658*	2.722	4.436	6.918	10.016	0.398*
		8.1	0.384*	0.86*	1.178*	1.558*	2.722	4.536	6.918	10.016	0.198*
		8.2	0.384*	0.86*	1.178*	1.558*	2.822	4.636	7.018	10.116	0.298*
		8.3	0.484*	0.96*	1.078*	1.458*	2.722	4.536	6.918	10.016	0.298*
		8.4	0.384*	0.76*	1.078*	1.458*	2.722	4.536	7.118	10.116	0.298*
		8.5	0.484*	0.96*	1.278*	1.658*	2.622	4.536	7.018	10.116	0.298*
		8.6	0.384*	0.86*	1.078*	1.558*	2.822	4.636	7.018	10.116	0.298*
		8.7	0.484*	0.86*	1.178*	1.558*	2.822	4.536	7.118	10.116	0.398*
		8.8	0.484*	0.86*	1.278*	1.658*	2.822	4.636	7.218	10.116	0.298*
		8.9	0.584*	0.86*	1.078*	1.558*	2.722	4.436	7.318	10.116	0.298*
		9	0.584*	0.96*	1.178*	1.658*	2.822	4.636	7.218	10.216	0.298*
		9.1	0.384*	0.86*	1.178*	1.558*	2.822	4.636	7.318	10.316	0.298*
		9.2	0.484*	0.86*	1.278*	1.658*	2.822	4.736	7.218	10.216	0.198*
		9.3	0.484*	0.86*	1.178*	1.558*	2.722	4.536	7.418	10.216	0.298*
		9.4	0.484*	0.96*	1.178*	1.658*	2.822	4.536	7.418	10.216	0.198*
		9.5	0.384*	0.76*	1.278*	1.658*	2.822	4.636	7.318	10.216	0.198*
		9.6	0.384*	0.86*	1.078*	1.558*	2.922	4.736	7.318	10.216	0.198*
		9.7	0.484*	0.86*	1.178*	1.558*	2.822	4.636	7.518	10.216	0.198*
		9.8	0.384*	0.86*	1.278*	1.758*	2.822	4.636	7.418	10.216	0.198*
		9.9	0.384*	0.76*	1.278*	1.858*	2.922	4.836	7.318	10.116	0.198*
		10	0.484*	0.96*	1.178*	1.658*	2.822	4.736	7.518	10.216	0.198*
		10.1	0.484*	0.86*	1.078*	1.658*	2.822	4.836	7.418	10.116	0.298*
		10.2	0.284*	0.76*	1.278*	1.758*	2.822	4.636	7.418	10.116	0.198*
		10.3	0.484*	0.86*	1.178*	1.658*	2.922	4.836	7.318	10.016	0.198*
		10.4	0.584*	0.96*	1.178*	1.758*	2.822	4.736	7.418	10.116	0.198*
		10.5	0.384*	0.86*	1.078*	1.658*	2.922	4.736	7.518	10.216	0.298*
		10.6	0.384*	0.76*	1.178*	1.658*	2.922	4.736	7.418	10.216	0.198*
		10.7	0.484*	0.96*	1.078*	1.758*	3.022	4.736	7.318	10.116	0.298*
		10.8	0.384*	0.96*	1.078*	1.658*	3.022	4.836	7.518	10.216	0.298*
		10.9	0.484*	1.06*	1.078*	1.658*	2.922	4.736	7.518	10.316	0.298*
		11	0.484*	0.96*	1.178*	1.758*	2.922	4.636	7.518	10.316	0.298*
		11.1	0.584*	0.96*	1.078*	1.658*	3.022	4.736	7.618	10.516	0.298*
		11.2	0.384*	0.86*	1.078*	1.658*	3.122	4.836	7.518	10.316	0.298*
		11.3	0.484*	0.86*	1.178*	1.758*	3.022	4.736	7.618	10.416	0.098*
		11.4	0.584*	0.96*	1.178*	1.758*	2.922	4.736	7.618	10.316	0.298*
		11.5	0.384*	0.86*	1.078*	1.758*	3.022	4.836	7.418	10.216	0.198*
		11.6	0.484*	0.86*	0.978*	1.758*	3.022	4.836	7.618	10.316	0.298*
		11.7	0.484*	0.96*	1.178*	1.858*	3.022	4.936	7.618	10.316	0.198*
		11.8	0.384*	0.76*	1.078*	1.758*	2.922	4.836	7.518	10.216	0.198*
		11.9	0.484*	0.76*	1.078*	1.758*	2.922	4.836	7.518	10.216	0.298*
		12	0.484*	0.86*	1.078*	1.858*	3.122	4.936	7.618	10.316	0.198*
		12.1	0.384*	0.86*	1.178*	1.858*	3.022	4.936	7.518	10.216	0.298*
		12.2	0.384*	0.86*	1.078*	1.858*	3.022	4.936	7.618	10.216	0.298*
		12.3	0.284*	0.86*	1.078*	1.858*	3.022	4.836	7.518	10.216	0.398*
		12.4	0.384*	0.76*	1.178*	1.858*	3.122	5.036	7.618	10.316	0.298*
		12.5	0.384*	0.96*	0.978*	1.758*	3.022	5.036	7.618	10.316	0.298*
		12.6	0.484*	0.96*	1.178*	1.858*	3.022	4.936	7.618	10.416	0.398*
		12.7	0.384*	0.96*	1.178*	1.858*	3.122	5.036	7.518	10.316	0.298*
		12.8	0.484*	0.96*	1.078*	1.858*	3.022	5.036	7.618	10.316	0.398*
		12.9	0.484*	0.96*	1.178*	1.858*	3.022	4.936	7.618	10.416	0.498*
		13	0.484*	0.96*	1.078*	1.758*	3.122	5.036	7.718	10.416	0.398*
		13.1	0.384*	0.86*	1.078*	1.758*	3.222	5.136	7.618	10.316	0.298*
		13.2	0.384*	0.96*	0.978*	1.758*	3.122	5.136	7.618	10.316	0.398*
		13.3	0.584*	0.96*	1.078*	1.858*	3.222	5.136	7.518	10.316	0.398*
		13.4	0.484*	0.96*	1.178*	1.958*	3.222	5.136	7.618	10.316	0.398*
		13.5	0.484*	0.96*	1.178*	1.858*	3.122	5.136	7.618	10.416	0.398*
		13.6	0.584*	1.06*	1.078*	1.758*	3.222	5.236	7.718	10.416	0.398*
		13.7	0.484*	0.86*	0.978*	1.758*	3.122	5.036	7.718	10.316	0.398*
		13.8	0.484*	0.86*	1.078*	1.758*	3.122	5.036	7.718	10.316	0.398*
		13.9	0.384*	0.86*	1.078*	1.758*	3.122	5.136	7.618	10.216	0.398*
		14	0.484*	0.86*	1.078*	1.758*	3.222	5.136	7.718	10.316	0.398*
		14.1	0.584*	1.06*	0.978*	1.658*	3.122	5.136	7.718	10.316	0.498*
		14.2	0.584*	1.06*	0.978*	1.758*	3.122	5.136	7.718	10.316	0.398*
		14.3	0.584*	0.86*	0.978*	1.758*	3.122	5.136	7.818	10.316	0.398*
		14.4	0.584*	0.86*	0.978*	1.658*	3.222	5.136	7.718	10.316	0.398*
		14.5	0.584*	0.86*	0.978*	1.658*	3.222	5.136	7.818	10.516	0.298*
		14.6	0.584*	0.86*	0.978*	1.658*	3.122	5.036	7.818	10.316	0.298*
		14.7	0.484*	0.96*	1.078*	1.758*	3.022	5.136	7.818	10.316	0.298*
		14.8	0.484*	0.96*	0.978*	1.658*	3.122	5.136	7.818	10.316	0.398*
		14.9	0.584*	0.96*	0.978*	1.658*	3.122	5.136	7.818	10.316	0.398*
		15	0.484*	0.86*	1.078*	1.758*	3.122	5.136	7.918	10.316	0.398*
		15.1	0.484*	0.76*	1.178*	1.758*	3.222	5.136	7.818	10.316	0.298*
		15.2	0.484*	0.86*	1.078*	1.658*	3.222	5.136	7.818	10.316	0.198*
		15.3	0.484*	0.86*	1.078*	1.558*	3.222	5.136	7.818	10.316	0.298*
		15.4	0.484*	0.86*	1.178*	1.758*	3.122	5.236	7.818	10.316	0.298*
		15.5	0.484*	0.86*	1.178*	1.758*	3.122	5.136	7.818	10.416	0.298*
		15.6	0.484*	0.96*	1.178*	1.758*	3.122	5.136	7.818	10.416	0.298*
		15.7	0.384*	0.86*	1.078*	1.758*	3.122	5.136	7.718	10.316	0.298*
		15.8	0.384*	0.86*	1.078*	1.758*	3.222	5.236	7.818	10.216	0.398*
		15.9	0.484*	0.86*	1.278*	1.858*	3.222	5.236	7.818	10.316	0.398*
		16	0.484*	0.96*	1.078*	1.658*	3.222	5.236	7.818	10.316	0.298*
		16.1	0.484*	0.86*	1.078*	1.658*	3.322	5.236	7.818	10.316	0.298*
		16.2	0.484*	0.86*	1.078*	1.758*	3.222	5.336	7.718	10.316	0.298*
		16.3	0.384*	0.76*	1.078*	1.758*	3.222	5.336	7.818	10.316	0.298*
		16.4	0.384*	0.86*	1.178*	1.758*	3.322	5.336	7.818	10.316	0.398*
		16.5	0.484*	0.86*	1.178*	1.658*	3.222	5.336	7.818	10.416	0.398*
		16.6	0.484*	0.86*	1.178*	1.758*	3.222	5.336	7.818	10.416	0.298*
		16.7	0.484*	0.86*	1.178*	1.758*	3.322	5.336	7.918	10.416	0.298*
		16.8	0.484*	0.86*	1.278*	1.758*	3.222	5.436	7.918	10.416	0.298*
		16.9	0.384*	0.86*	1.278*	1.758*	3.222	5.336	7.818	10.316	0.298*
		17	0.484*	0.96*	1.278*	1.758*	3.222	5.336	7.718	10.316	0.298*
		17.1	0.384*	0.86*	1.278*	1.858*	3.322	5.436	7.818	10.416	0.298*
		17.2	0.384*	0.86*	1.378*	1.858*	3.222	5.336	7.918	10.416	0.298*
		17.3	0.384*	0.86*	1.378*	1.858*	3.222	5.336	7.918	10.416	0.298*
		17.4	0.384*	0.96*	1.278*	1.758*	3.222	5.336	7.918	10.416	0.198*
		17.5	0.484*	0.96*	1.278*	1.758*	3.322	5.436	7.818	10.416	0.198*
		17.6	0.484*	0.96*	1.278*	1.758*	3.322	5.436	7.918	10.316	0.298*
		17.7	0.484*	0.96*	1.278*	1.858*	3.322	5.436	7.818	10.316	0.298*
		17.8	0.484*	1.06*	1.378*	1.858*	3.322	5.536	7.818	10.316	0.298*
		17.9	0.484*	1.06*	1.378*	1.858*	3.322	5.536	7.818	10.416	0.298*
		18	0.384*	0.96*	1.378*	1.858*	3.322	5.536	7.918	10.416	0.298*
		18.1	0.484*	0.96*	1.378*	1.958*	3.222	5.436	7.818	10.316	0.398*
		18.2	0.484*	0.96*	1.378*	1.958*	3.222	5.436	7.818	10.316	0.398*
		18.3	0.484*	0.96*	1.478*	1.958*	3.322	5.536	7.818	10.316	0.298*
		18.4	0.484*	1.06*	1.478*	1.958*	3.322	5.536	7.818	10.316	0.298*
		18.5	0.484*	1.06*	1.478*	1.958*	3.322	5.536	7.918	10.416	0.298*
		18.6	0.484*	0.96*	1.478*	1.958*	3.422	5.536	7.918	10.416	0.298*
		18.7	0.484*	0.96*	1.478*	2.058*	3.322	5.436	7.918	10.416	0.398*
		18.8	0.484*	0.96*	1.478*	2.058*	3.322	5.436	7.818	10.316	0.398*
		18.9	0.484*	0.96*	1.478*	1.958*	3.222	5.436	7.918	10.316	0.398*
		19	0.484*	0.86*	1.478*	1.858*	3.222	5.436	7.918	10.416	0.398*
		19.1	0.584*	0.96*	1.378*	1.758*	3.322	5.436	7.918	10.416	0.398*
		19.2	0.584*	0.96*	1.378*	1.858*	3.322	5.436	7.918	10.416	0.298*
		19.3	0.584*	0.96*	1.378*	1.858*	3.322	5.436	8.018	10.416	0.298*
		19.4	0.484*	0.86*	1.378*	1.858*	3.322	5.536	8.018	10.416	0.298*
		19.5	0.484*	0.86*	1.478*	1.858*	3.422	5.536	7.918	10.416	0.298*
		19.6	0.484*	0.96*	1.478*	1.858*	3.322	5.436	7.918	10.416	0.398*
		19.7	0.584*	0.96*	1.478*	1.858*	3.222	5.336	8.018	10.416	0.398*
		19.8	0.484*	0.86*	1.378*	1.858*	3.322	5.336	8.018	10.416	0.298*
		19.9	0.484*	0.86*	1.378*	1.858*	3.322	5.336	8.018	10.516	0.298*
		20	0.484*	0.86*	1.378*	1.858*	3.322	5.336	8.018	10.516	0.298*
		20.1	0.484*	0.86*	1.378*	1.858*	3.322	5.436	8.018	10.416	0.298*
		20.2	0.484*	0.96*	1.478*	1.858*	3.322	5.436	8.018	10.416	0.298*
		20.3	0.584*	0.96*	1.378*	1.958*	3.422	5.436	8.018	10.416	0.298*
		20.4	0.484*	0.86*	1.378*	1.958*	3.322	5.436	8.018	10.516	0.298*
		20.5	0.484*	0.86*	1.278*	1.858*	3.222	5.336	8.018	10.516	0.298*
		20.6	0.484*	0.86*	1.278*	1.958*	3.322	5.336	8.118	10.416	0.298*
		20.7	0.484*	0.86*	1.378*	1.958*	3.322	5.336	8.018	10.316	0.298*
		20.8	0.484*	0.96*	1.378*	1.958*	3.322	5.336	8.018	10.316	0.298*
		20.9	0.384*	0.86*	1.378*	1.958*	3.322	5.336	8.018	10.416	0.398*
		21	0.484*	0.86*	1.378*	2.058*	3.422	5.436	8.118	10.416	0.298*
		21.1	0.384*	0.86*	1.278*	1.858*	3.422	5.436	8.118	10.416	0.198*
		21.2	0.384*	0.76*	1.378*	1.858*	3.422	5.436	8.018	10.316	0.198*
		21.3	0.384*	0.76*	1.378*	1.858*	3.322	5.336	8.018	10.316	0.198*
		21.4	0.284*	0.66*	1.378*	1.858*	3.322	5.336	8.018	10.316	0.298*
		21.5	0.384*	0.76*	1.378*	1.958*	3.422	5.336	8.018	10.416	0.298*
		21.6	0.384*	0.76*	1.378*	1.958*	3.422	5.436	8.118	10.416	0.298*
		21.7	0.384*	0.76*	1.378*	1.858*	3.422	5.436	8.218	10.516	0.298*
		21.8	0.384*	0.76*	1.378*	1.858*	3.422	5.436	8.118	10.416	0.198*
		21.9	0.384*	0.76*	1.378*	1.858*	3.422	5.436	8.118	10.416	0.198*
		22	0.384*	0.76*	1.378*	1.958*	3.522	5.536	8.118	10.516	0.298*
		22.1	0.484*	0.86*	1.378*	1.958*	3.322	5.336	8.218	10.516	0.298*
		22.2	0.484*	0.86*	1.378*	1.958*	3.322	5.336	8.218	10.516	0.298*
		22.3	0.484*	0.86*	1.378*	1.858*	3.322	5.336	8.218	10.516	0.298*
		22.4	0.484*	0.86*	1.378*	1.958*	3.322	5.436	8.118	10.316	0.198*
		22.5	0.584*	0.86*	1.378*	1.958*	3.322	5.436	8.018	10.316	0.298*
		22.6	0.484*	0.86*	1.378*	1.958*	3.322	5.436	8.018	10.416	0.298*
		22.7	0.484*	0.86*	1.378*	1.958*	3.422	5.436	8.118	10.416	0.298*
		22.8	0.484*	0.86*	1.378*	1.958*	3.322	5.436	8.118	10.416	0.298*
		22.9	0.484*	0.86*	1.278*	1.858*	3.322	5.436	8.118	10.416	0.198*
		23	0.484*	0.86*	1.278*	1.858*	3.322	5.436	8.018	10.316	0.298*
		23.1	0.584*	0.96*	1.278*	1.858*	3.422	5.436	8.018	10.416	0.298*
		23.2	0.584*	0.96*	1.278*	1.958*	3.422	5.336	8.018	10.416	0.298*
		23.3	0.484*	0.86*	1.378*	1.958*	3.322	5.336	8.018	10.416	0.298*
		23.4	0.484*	0.86*	1.378*	1.958*	3.222	5.336	8.118	10.416	0.298*
		23.5	0.484*	0.86*	1.378*	1.958*	3.222	5.336	8.118	10.416	0.298*
		23.6	0.484*	0.96*	1.378*	2.058*	3.222	5.336	8.118	10.416	0.298*
		23.7	0.384*	0.96*	1.278*	1.958*	3.222	5.336	8.018	10.416	0.298*
		23.8	0.484*	0.96*	1.278*	1.958*	3.322	5.336	8.018	10.416	0.298*
		23.9	0.484*	0.96*	1.378*	1.958*	3.322	5.436	8.018	10.416	0.298*
		24	0.484*	1.06*	1.378*	2.058*	3.222	5.336	8.018	10.416	0.198*
		24.1	0.484*	1.06*	1.378*	2.058*	3.222	5.336	7.918	10.316	0.298*
		24.2	0.384*	0.96*	1.378*	2.058*	3.222	5.336	8.018	10.316	0.298*
		24.3	0.384*	0.96*	1.378*	2.058*	3.222	5.336	8.018	10.316	0.298*
		24.4	0.484*	0.86*	1.378*	2.058*	3.222	5.436	8.118	10.516	0.298*
		24.5	0.484*	0.96*	1.278*	1.958*	3.322	5.436	8.118	10.516	0.298*
		24.6	0.484*	0.96*	1.378*	2.058*	3.422	5.536	8.118	10.416	0.298*
		24.7	0.484*	0.96*	1.378*	2.058*	3.322	5.436	8.018	10.316	0.198*
		24.8	0.384*	0.86*	1.378*	2.058*	3.322	5.436	8.018	10.416	0.298*
		24.9	0.384*	0.86*	1.378*	1.958*	3.422	5.536	8.018	10.416	0.198*
		25	0.384*	0.86*	1.278*	1.858*	3.422	5.536	8.118	10.416	0.198*
		25.1	0.384*	0.96*	1.278*	1.958*	3.422	5.536	8.118	10.416	0.398*
		25.2	0.384*	0.96*	1.278*	1.958*	3.422	5.536	8.118	10.416	0.298*
		25.3	0.484*	0.96*	1.378*	1.958*	3.522	5.636	8.118	10.416	0.298*
		25.4	0.384*	0.86*	1.378*	1.958*	3.422	5.536	8.018	10.316	0.298*
		25.5	0.384*	0.86*	1.378*	1.958*	3.422	5.536	8.018	10.416	0.298*
		25.6	0.384*	0.96*	1.278*	2.058*	3.422	5.536	8.018	10.416	0.298*
		25.7	0.384*	0.96*	1.278*	2.058*	3.422	5.536	8.118	10.416	0.398*
		25.8	0.484*	0.96*	1.278*	1.958*	3.522	5.636	8.118	10.416	0.398*
		25.9	0.484*	0.96*	1.378*	1.958*	3.522	5.636	8.018	10.316	0.398*
		26	0.484*	0.96*	1.278*	1.958*	3.522	5.636	8.018	10.316	0.398*
		26.1	0.384*	0.86*	1.278*	1.858*	3.522	5.636	8.018	10.416	0.398*
		26.2	0.384*	0.86*	1.178*	1.758*	3.522	5.636	8.018	10.416	0.398*
		26.3	0.384*	0.96*	1.178*	1.858*	3.422	5.536	8.018	10.416	0.398*
		26.4	0.384*	0.96*	1.178*	1.858*	3.422	5.536	8.018	10.416	0.498*
		26.5	0.484*	0.96*	1.178*	1.858*	3.422	5.536	8.018	10.416	0.498*
		26.6	0.384*	0.86*	1.178*	1.858*	3.522	5.636	8.018	10.416	0.498*
		26.7	0.384*	0.86*	1.178*	1.858*	3.522	5.636	8.018	10.416	0.498*
		26.8	0.484*	0.86*	1.178*	1.858*	3.522	5.636	8.118	10.416	0.598*
		26.9	0.484*	0.86*	1.178*	1.858*	3.422	5.536	8.118	10.416	0.598*
		27	0.384*	0.86*	1.178*	1.958*	3.422	5.536	8.018	10.416	0.598*
		27.1	0.484*	0.86*	1.178*	1.958*	3.422	5.636	8.018	10.416	0.598*
		27.2	0.484*	0.96*	1.178*	1.958*	3.422	5.636	8.018	10.416	0.598*
		27.3	0.384*	0.96*	1.178*	1.958*	3.422	5.636	8.018	10.416	0.698*
		27.4	0.384*	0.86*	1.278*	1.958*	3.422	5.636	8.018	10.416	0.698*
		27.5	0.384*	0.86*	1.178*	1.958*	3.522	5.636	8.018	10.416	0.598*
		27.6	0.384*	0.86*	1.178*	1.958*	3.422	5.536	8.018	10.416	0.498*
		27.7	0.384*	0.76*	1.178*	1.958*	3.322	5.536	8.018	10.416	0.498*
		27.8	0.384*	0.76*	1.178*	1.958*	3.322	5.536	8.018	10.416	0.498*
		27.9	0.284*	0.66*	1.178*	1.858*	3.322	5.536	8.018	10.416	0.498*
		28	0.384*	0.76*	1.178*	1.858*	3.322	5.536	7.918	10.416	0.398*
		28.1	0.384*	0.76*	1.178*	1.858*	3.322	5.536	7.918	10.416	0.398*
		28.2	0.484*	0.76*	1.078*	1.858*	3.422	5.536	8.018	10.516	0.498*
		28.3	0.484*	0.76*	1.078*	1.858*	3.322	5.536	7.918	10.416	0.498*
		28.4	0.384*	0.66*	1.078*	1.658*	3.422	5.536	8.018	10.416	0.398*
		28.5	0.384*	0.76*	1.178*	1.758*	3.422	5.536	7.918	10.416	0.498*
		28.6	0.484*	0.76*	1.078*	1.858*	3.522	5.536	8.018	10.416	0.498*
		28.7	0.484*	0.76*	1.078*	1.858*	3.522	5.636	8.018	10.516	0.498*
		28.8	0.384*	0.76*	1.078*	1.858*	3.522	5.636	8.018	10.416	0.498*
		28.9	0.384*	0.76*	1.078*	1.858*	3.422	5.436	8.118	10.516	0.498*
		29	0.384*	0.76*	1.078*	1.758*	3.422	5.436	8.118	10.516	0.598*
		29.1	0.384*	0.66*	1.178*	1.758*	3.422	5.536	8.118	10.516	0.498*
		29.2	0.384*	0.66*	1.078*	1.758*	3.622	5.536	8.118	10.516	0.598*
		29.3	0.384*	0.56*	1.178*	1.858*	3.622	5.636	8.118	10.616	0.698*
		29.4	-0.116*	0.36*	1.378*	2.158*	3.722	5.636	8.318	10.716	0.698*
		29.5	-0.216*	0.06*	1.278*	1.958*	3.722	5.736	8.118	10.716	0.798*
		29.6	-0.116*	-0.04*	1.378*	2.158*	3.922	6.136	8.118	10.916	0.698*
		29.7	-1.016*	-1.04*	1.278*	1.758*	3.622	6.136	8.018	11.416	1.198*
		29.8	0.084*	0.06*	1.578*	1.958*	3.822	6.736	7.618	10.916	0.698*
		29.9	1.184*	1.76*	1.378*	2.158*	2.422	4.936	7.618	9.916	0.798*
		30	-1.916*	-1.04*	-0.622*	0.158*	-1.878	7.036	6.118	13.716	3.898*
		30.1	-7.616*	-6.74*	0.078*	0.458*	2.622	13.636	7.818	18.616	6.998*
		30.2	-4.916*	-4.84*	1.178*	1.658*	4.422	11.536	8.618	15.716	5.598*
		30.3	-2.816*	-2.24*	1.278*	1.958*	3.922	9.436	7.618	13.816	4.098*
		30.4	-1.516*	-0.94*	1.278*	2.058*	3.222	7.836	7.718	12.416	3.398*
		30.5	-0.916*	-0.34*	1.278*	2.158*	2.922	7.036	7.418	11.116	2.198*
		30.6	-0.716*	0.06*	1.078*	1.758*	2.822	6.036	7.518	10.716	1.398*
		30.7	-0.416*	-0.04*	1.378*	2.058*	2.722	5.736	7.218	10.416	1.298*
		30.8	-0.216*	0.06*	1.278*	1.758*	3.322	5.736	8.118	10.716	1.398*
		30.9	-0.116*	0.06*	1.178*	1.658*	3.222	5.736	7.418	10.116	1.098*
		31	-0.316*	-0.04*	0.978*	1.558*	2.822	5.336	7.418	10.016	0.898*
		31.1	-0.216*	0.06*	1.178*	1.758*	3.022	5.336	7.018	9.616	0.798*
		31.2	-0.316*	0.26*	1.278*	1.858*	2.922	5.136	7.218	9.616	0.698*
		31.3	-0.216*	0.26*	1.178*	1.858*	3.022	5.136	7.018	9.416	0.698*
		31.4	-0.016*	0.26*	1.178*	1.758*	3.022	5.236	7.118	9.416	0.598*
		31.5	-0.216*	0.26*	1.078*	1.658*	3.022	5.236	7.018	9.316	0.498*
		31.6	-0.116*	0.26*	0.978*	1.558*	2.922	5.136	6.518	8.716	0.698*
		31.7	0.084*	0.16*	0.978*	1.458*	2.922	4.936	6.518	8.816	0.998*
		31.8	0.184*	0.36*	1.078*	1.658*	2.922	4.936	6.518	8.816	0.698*
		31.9	-0.016*	0.36*	0.978*	1.558*	2.822	4.736	6.418	8.716	0.598*
		32	-0.116*	0.46*	0.978*	1.658*	2.722	4.636	6.218	8.516	0.598*
		32.1	-0.016*	0.46*	0.978*	1.658*	2.722	4.636	6.418	8.516	0.598*
		32.2	0.084*	0.56*	0.878*	1.558*	2.622	4.536	6.218	8.416	0.698*
		32.3	0.184*	0.56*	1.078*	1.558*	2.622	4.436	6.318	8.316	0.598*
		32.4	0.284*	0.66*	0.978*	1.458*	2.522	4.536	6.218	8.216	0.598*
		32.5	0.184*	0.66*	0.978*	1.458*	2.522	4.536	6.218	8.116	0.598*
		32.6	0.084*	0.46*	0.978*	1.458*	2.622	4.436	6.118	8.016	0.498*
		32.7	-0.016*	0.46*	0.778*	1.358*	2.522	4.436	5.918	7.916	0.498*
		32.8	0.184*	0.46*	0.878*	1.258*	2.422	4.336	5.918	7.716	0.598*
		32.9	0.084*	0.56*	0.878*	1.358*	2.322	4.036	5.818	7.716	0.598*
		33	0.084*	0.36*	0.878*	1.358*	2.422	4.036	5.918	7.716	0.598*
		33.1	-0.016*	0.36*	0.878*	1.358*	2.422	3.936	5.818	7.616	0.698*
		33.2	0.084*	0.36*	0.878*	1.358*	2.422	3.936	5.718	7.616	0.598*
		33.3	0.084*	0.36*	0.978*	1.458*	2.422	3.936	5.618	7.416	0.598*
		33.4	0.084*	0.46*	0.878*	1.358*	2.222	3.736	5.618	7.316	0.698*
		33.5	0.184*	0.46*	0.978*	1.358*	2.222	3.636	5.518	7.216	0.598*
		33.6	0.084*	0.46*	0.878*	1.358*	2.222	3.736	5.318	7.016	0.598*
		33.7	0.084*	0.46*	0.978*	1.458*	2.122	3.636	5.318	7.016	0.598*
		33.8	0.184*	0.46*	0.978*	1.358*	2.022	3.636	5.318	7.016	0.498*
		33.9	0.184*	0.56*	0.978*	1.358*	2.022	3.536	5.318	7.016	0.498*
		34	0.084*	0.46*	0.878*	1.258*	2.022	3.536	5.218	6.816	0.498*
		34.1	-0.016*	0.46*	0.878*	1.258*	1.922	3.436	5.118	6.716	0.498*
		34.2	0.184*	0.46*	0.878*	1.258*	1.922	3.536	5.118	6.716	0.498*
		34.3	0.284*	0.66*	0.778*	1.158*	1.822	3.536	5.018	6.616	0.298*
		34.4	0.184*	0.56*	0.778*	1.158*	1.722	3.336	5.018	6.516	0.398*
		34.5	0.184*	0.46*	0.778*	1.158*	1.722	3.336	4.918	6.516	0.298*
		34.6	0.084*	0.46*	0.778*	1.158*	1.722	3.336	4.918	6.416	0.398*
		34.7	0.084*	0.36*	0.778*	1.158*	1.722	3.336	4.918	6.416	0.398*
		34.8	0.184*	0.46*	0.778*	1.158*	1.622	3.136	4.818	6.316	0.398*
		34.9	0.084*	0.46*	0.778*	1.158*	1.622	3.136	4.818	6.216	0.398*
		35	0.084*	0.46*	0.978*	1.258*	1.622	3.036	4.818	6.116	0.398*
		35.1	0.184*	0.56*	0.978*	1.258*	1.622	3.036	4.718	6.116	0.398*
		35.2	0.084*	0.46*	0.978*	1.258*	1.522	3.036	4.518	5.916	0.198*
		35.3	0.084*	0.56*	0.978*	1.258*	1.422	2.936	4.518	5.816	0.298*
		35.4	0.084*	0.56*	0.878*	1.158*	1.522	3.036	4.418	5.816	0.398*
		35.5	-0.016*	0.46*	0.878*	1.058*	1.522	2.936	4.318	5.716	0.298*
		35.6	0.084*	0.36*	0.778*	1.058*	1.422	2.836	4.318	5.616	0.298*
		35.7	0.084*	0.46*	0.778*	1.158*	1.322	2.836	4.118	5.516	0.398*
		35.8	0.084*	0.46*	0.678*	1.058*	1.322	2.836	4.118	5.516	0.298*
		35.9	-0.016*	0.46*	0.678*	0.958*	1.522	2.936	4.018	5.216	0.298*
		36	0.084*	0.46*	0.578*	0.858*	1.422	2.836	4.018	5.316	0.298*
		36.1	-0.016*	0.36*	0.778*	0.958*	1.322	2.736	3.918	5.216	0.298*
		36.2	-0.016*	0.36*	0.678*	0.858*	1.222	2.636	3.818	5.116	0.298*
		36.3	0.184*	0.46*	0.578*	0.858*	1.422	2.736	3.718	5.016	0.198*
		36.4	-0.016*	0.36*	0.678*	0.958*	1.322	2.636	3.718	5.016	0.398*
		36.5	0.184*	0.46*	0.578*	0.858*	1.322	2.636	3.718	4.916	0.198*
		36.6	-0.016*	0.36*	0.678*	0.958*	1.222	2.536	3.618	4.716	0.198*
		36.7	-0.016*	0.26*	0.578*	0.858*	1.222	2.636	3.618	4.716	-0.002*
		36.8	0.184*	0.36*	0.578*	1.058*	1.222	2.636	3.518	4.516	0.198*
		36.9	0.084*	0.36*	0.578*	0.958*	1.222	2.536	3.518	4.516	0.198*
		37	0.184*	0.46*	0.678*	0.958*	1.322	2.536	3.418	4.516	0.198*
		37.1	0.184*	0.36*	0.578*	0.958*	1.122	2.436	3.418	4.416	0.198*
		37.2	0.284*	0.46*	0.578*	0.858*	1.222	2.536	3.418	4.416	0.198*
		37.3	0.184*	0.36*	0.578*	0.958*	1.122	2.436	3.318	4.316	0.198*
		37.4	0.184*	0.46*	0.478*	0.858*	1.122	2.436	3.318	4.316	0.198*
		37.5	0.084*	0.26*	0.678*	0.958*	1.122	2.336	3.218	4.216	0.198*
		37.6	0.184*	0.46*	0.678*	0.858*	1.022	2.336	3.318	4.216	0.198*
		37.7	0.084*	0.26*	0.778*	0.958*	1.022	2.336	3.118	4.216	0.398*
		37.8	0.084*	0.36*	0.678*	0.858*	1.122	2.336	3.318	4.216	0.398*
		37.9	-0.116*	0.16*	0.778*	0.758*	1.022	2.236	3.118	4.216	0.398*
		38	0.084*	0.36*	0.678*	0.858*	1.022	2.336	3.118	4.016	0.298*
		38.1	-0.016*	0.26*	0.778*	0.858*	1.022	2.236	3.118	4.116	0.298*
		38.2	-0.016*	0.36*	0.778*	0.858*	0.922	2.136	3.018	4.016	0.398*
		38.3	-0.016*	0.26*	0.778*	0.858*	1.122	2.236	2.918	3.916	0.298*
		38.4	0.184*	0.36*	0.678*	0.858*	0.922	2.036	3.018	3.916	0.298*
		38.5	-0.016*	0.26*	0.778*	0.858*	1.122	2.236	3.018	3.816	0.298*
		38.6	0.084*	0.46*	0.678*	0.758*	0.922	2.036	2.818	3.716	0.198*
		38.7	-0.016*	0.26*	0.578*	0.858*	1.122	2.136	2.918	3.816	0.298*
		38.8	0.084*	0.46*	0.678*	0.758*	1.022	2.236	2.718	3.616	0.098*
		38.9	0.084*	0.36*	0.578*	0.858*	1.122	2.136	2.918	3.716	0.198*
		39	0.084*	0.46*	0.678*	0.758*	1.022	2.036	2.718	3.616	0.098*
		39.1	0.084*	0.36*	0.478*	0.758*	1.122	2.136	2.718	3.516	0.198*
		39.2	0.084*	0.46*	0.578*	0.858*	0.922	1.936	2.718	3.616	0.098*
		39.3	0.084*	0.36*	0.578*	0.858*	1.022	2.136	2.818	3.516	0.198*
		39.4	-0.016*	0.26*	0.578*	0.858*	1.022	2.036	2.718	3.516	-0.002*
		39.5	0.084*	0.46*	0.678*	0.858*	0.922	1.936	2.718	3.516	0.098*
		39.6	-0.116*	0.26*	0.578*	0.858*	1.022	1.936	2.718	3.416	0.098*
		39.7	0.084*	0.46*	0.578*	0.858*	0.922	1.936	2.518	3.316	0.098*
		39.8	-0.016*	0.26*	0.478*	0.758*	1.022	1.936	2.618	3.316	0.198*
		39.9	0.084*	0.36*	0.578*	0.858*	0.922	1.836	2.518	3.116	0.098*
		40	-0.016*	0.26*	0.478*	0.858*	0.822	1.836	2.518	3.116	0.198*
		40.1	0.084*	0.36*	0.478*	0.758*	0.922	1.836	2.418	3.016	0.198*
		40.2	-0.016*	0.36*	0.578*	0.958*	0.822	1.836	2.418	3.116	0.198*
		40.3	0.084*	0.36*	0.578*	0.858*	0.922	1.736	2.618	3.116	0.198*
		40.4	-0.016*	0.26*	0.578*	0.858*	0.922	1.836	2.418	2.916	0.298*
		40.5	0.084*	0.46*	0.478*	0.858*	0.822	1.736	2.318	3.016	0.198*
		40.6	0.084*	0.36*	0.578*	0.858*	0.922	1.836	2.418	3.016	0.298*
		40.7	0.084*	0.26*	0.478*	0.758*	0.822	1.736	2.418	2.916	0.398*
		40.8	0.084*	0.36*	0.578*	0.858*	0.922	1.736	2.218	2.816	0.298*
		40.9	-0.016*	0.26*	0.478*	0.758*	0.822	1.736	2.318	2.916	0.298*
		41	0.184*	0.46*	0.578*	0.858*	0.822	1.736	2.318	2.816	0.298*
		41.1	-0.016*	0.26*	0.578*	0.758*	0.922	1.836	2.118	2.816	0.298*
		41.2	0.084*	0.26*	0.478*	0.758*	0.822	1.736	2.118	2.716	0.398*
		41.3	0.184*	0.46*	0.578*	0.758*	0.822	1.636	2.118	2.616	0.398*
		41.4	0.184*	0.36*	0.478*	0.758*	0.822	1.736	2.018	2.716	0.498*
		41.5	0.184*	0.46*	0.678*	0.758*	0.822	1.736	2.118	2.616	0.398*
		41.6	0.184*	0.46*	0.478*	0.658*	0.722	1.636	2.118	2.716	0.298*
		41.7	-0.016*	0.26*	0.478*	0.758*	0.822	1.736	2.218	2.716	0.498*
		41.8	0.184*	0.46*	0.678*	0.758*	0.722	1.736	2.118	2.616	0.398*
		41.9	0.184*	0.46*	0.478*	0.658*	0.822	1.636	2.018	2.516	0.398*
		42	0.084*	0.26*	0.478*	0.658*	0.722	1.736	2.118	2.616	0.498*
		42.1	0.084*	0.36*	0.478*	0.558*	0.722	1.636	2.118	2.616	0.398*
		42.2	0.284*	0.46*	0.478*	0.558*	0.822	1.736	1.918	2.416	0.398*
		42.3	0.084*	0.36*	0.478*	0.658*	0.622	1.536	1.818	2.416	0.498*
		42.4	0.084*	0.36*	0.578*	0.658*	0.822	1.636	2.018	2.516	0.398*
		42.5	0.184*	0.36*	0.478*	0.558*	0.722	1.636	1.818	2.316	0.398*
		42.6	0.184*	0.36*	0.478*	0.658*	0.722	1.536	1.818	2.316	0.498*
		42.7	0.084*	0.36*	0.478*	0.458*	0.722	1.536	1.918	2.416	0.398*
		42.8	0.284*	0.36*	0.478*	0.558*	0.722	1.536	1.918	2.316	0.398*
		42.9	0.184*	0.46*	0.578*	0.658*	0.722	1.436	1.718	2.316	0.398*
		43	0.084*	0.36*	0.478*	0.558*	0.722	1.436	1.818	2.216	0.398*
		43.1	0.184*	0.36*	0.478*	0.558*	0.622	1.436	1.818	2.316	0.398*
		43.2	0.184*	0.26*	0.478*	0.658*	0.722	1.436	1.718	2.216	0.298*
		43.3	0.084*	0.36*	0.578*	0.658*	0.722	1.436	1.718	2.216	0.398*
		43.4	0.184*	0.36*	0.378*	0.558*	0.622	1.436	1.718	2.116	0.398*
		43.5	0.084*	0.36*	0.578*	0.658*	0.622	1.336	1.718	2.216	0.398*
		43.6	0.084*	0.36*	0.578*	0.658*	0.622	1.336	1.718	2.116	0.398*
		43.7	0.084*	0.26*	0.478*	0.658*	0.722	1.436	1.718	2.116	0.398*
		43.8	0.084*	0.36*	0.478*	0.558*	0.722	1.436	1.818	2.116	0.398*
		43.9	0.084*	0.36*	0.578*	0.658*	0.622	1.336	1.618	2.016	0.398*
		44	0.084*	0.26*	0.478*	0.658*	0.522	1.336	1.718	2.116	0.298*
		44.1	-0.016*	0.26*	0.478*	0.658*	0.522	1.336	1.718	2.016	0.398*
		44.2	0.084*	0.36*	0.478*	0.558*	0.622	1.336	1.718	2.016	0.298*
		44.3	-0.016*	0.36*	0.478*	0.658*	0.622	1.336	1.618	2.016	0.398*
		44.4	-0.116*	0.26*	0.478*	0.658*	0.522	1.236	1.618	2.016	0.298*
		44.5	0.084*	0.36*	0.578*	0.658*	0.522	1.336	1.618	2.016	0.298*
		44.6	-0.016*	0.26*	0.478*	0.558*	0.422	1.336	1.618	2.016	0.398*
		44.7	-0.116*	0.26*	0.378*	0.558*	0.522	1.336	1.518	1.916	0.398*
		44.8	0.084*	0.36*	0.578*	0.658*	0.522	1.236	1.618	1.916	0.398*
		44.9	-0.016*	0.26*	0.578*	0.658*	0.422	1.236	1.618	2.016	0.298*
		45	-0.116*	0.36*	0.478*	0.658*	0.422	1.336	1.518	1.916	0.298*
		45.1	-0.016*	0.26*	0.378*	0.558*	0.422	1.236	1.618	1.816	0.298*
		45.2	-0.116*	0.16*	0.478*	0.558*	0.422	1.136	1.518	1.816	0.398*
		45.3	-0.016*	0.36*	0.578*	0.758*	0.322	1.236	1.618	2.016	0.198*
		45.4	-0.116*	0.36*	0.478*	0.658*	0.422	1.236	1.518	1.816	0.298*
		45.5	-0.016*	0.26*	0.478*	0.658*	0.322	1.136	1.518	1.816	0.298*
		45.6	-0.016*	0.36*	0.478*	0.558*	0.422	1.136	1.618	1.816	0.298*
		45.7	-0.116*	0.36*	0.478*	0.458*	0.322	1.136	1.518	1.916	0.298*
		45.8	-0.016*	0.26*	0.378*	0.558*	0.322	1.136	1.518	1.716	0.298*
		45.9	-0.016*	0.26*	0.578*	0.658*	0.322	1.136	1.518	1.716	0.298*
		46	-0.016*	0.36*	0.478*	0.558*	0.422	1.136	1.518	1.816	0.098*
		46.1	0.084*	0.36*	0.478*	0.458*	0.322	1.136	1.518	1.816	0.098*
		46.2	-0.016*	0.36*	0.478*	0.458*	0.322	1.136	1.418	1.716	0.298*
		46.3	0.084*	0.46*	0.578*	0.658*	0.422	1.036	1.318	1.716	0.298*
		46.4	-0.016*	0.36*	0.578*	0.558*	0.322	1.036	1.518	1.716	0.098*
		46.5	0.084*	0.36*	0.478*	0.458*	0.322	1.036	1.518	1.816	0.098*
		46.6	0.084*	0.36*	0.478*	0.458*	0.222	0.936	1.318	1.616	0.298*
		46.7	0.084*	0.46*	0.578*	0.658*	0.422	1.036	1.418	1.616	0.198*
		46.8	-0.016*	0.36*	0.478*	0.458*	0.322	0.936	1.418	1.616	0.098*
		46.9	0.084*	0.36*	0.478*	0.458*	0.322	0.936	1.318	1.516	0.198*
		47	0.084*	0.46*	0.478*	0.458*	0.222	0.936	1.318	1.616	0.198*
		47.1	0.084*	0.56*	0.678*	0.558*	0.222	0.836	1.318	1.516	0.098*
		47.2	0.084*	0.46*	0.578*	0.558*	0.322	0.936	1.418	1.516	0.098*
		47.3	0.084*	0.36*	0.478*	0.458*	0.322	0.936	1.318	1.516	0.098*
		47.4	0.084*	0.36*	0.478*	0.458*	0.322	0.836	1.218	1.516	0.298*
		47.5	0.184*	0.46*	0.578*	0.558*	0.222	0.836	1.218	1.416	0.098*
		47.6	0.184*	0.46*	0.578*	0.458*	0.322	0.936	1.418	1.516	0.098*
		47.7	0.084*	0.46*	0.478*	0.458*	0.222	0.836	1.318	1.416	0.098*
		47.8	0.184*	0.46*	0.478*	0.458*	0.322	0.836	1.218	1.416	0.198*
		47.9	0.084*	0.46*	0.378*	0.358*	0.322	0.836	1.218	1.416	0.098*
		48	0.184*	0.46*	0.478*	0.458*	0.222	0.836	1.118	1.416	0.098*
		48.1	0.084*	0.46*	0.578*	0.458*	0.222	0.836	1.218	1.416	0.098*
		48.2	0.184*	0.46*	0.478*	0.458*	0.322	0.936	1.218	1.316	0.098*
		48.3	0.084*	0.36*	0.378*	0.358*	0.322	0.836	1.118	1.316	0.198*
		48.4	0.184*	0.46*	0.478*	0.458*	0.222	0.836	1.118	1.316	0.198*
		48.5	0.184*	0.56*	0.578*	0.458*	0.222	0.836	1.118	1.316	0.098*
		48.6	0.284*	0.46*	0.378*	0.358*	0.222	0.736	1.118	1.216	0.098*
		48.7	0.084*	0.36*	0.378*	0.358*	0.322	0.836	1.218	1.316	0.098*
		48.8	0.084*	0.36*	0.378*	0.458*	0.322	0.836	1.118	1.316	0.198*
		48.9	0.184*	0.46*	0.478*	0.558*	0.222	0.836	1.018	1.316	0.298*
		49	0.184*	0.46*	0.478*	0.458*	0.122	0.736	1.018	1.216	0.198*
		49.1	0.184*	0.36*	0.378*	0.358*	0.122	0.736	1.018	1.216	0.098*
		49.2	0.184*	0.36*	0.378*	0.358*	0.322	0.836	1.018	1.216	0.098*
		49.3	0.084*	0.36*	0.378*	0.458*	0.322	0.836	1.018	1.116	0.198*
		49.4	0.084*	0.36*	0.278*	0.358*	0.322	0.736	1.018	1.216	0.198*
		49.5	0.184*	0.36*	0.478*	0.358*	0.122	0.636	1.018	1.216	0.098*
		49.6	0.184*	0.36*	0.378*	0.358*	0.222	0.836	0.918	1.116	0.098*
		49.7	0.084*	0.36*	0.278*	0.358*	0.322	0.836	0.918	1.116	0.098*
		49.8	-0.016*	0.26*	0.278*	0.358*	0.322	0.736	1.018	1.116	0.198*
		49.9	-0.016*	0.26*	0.278*	0.358*	0.222	0.636	0.918	1.016	0.198*
		50	0.084*	0.26*	0.378*	0.458*	0.222	0.736	0.918	1.116	0.098*
		50.1	0.184*	0.36*	0.278*	0.258*	0.122	0.736	0.918	1.016	0.198*
		50.2	0.184*	0.36*	0.278*	0.258*	0.222	0.736	1.018	1.016	0.198*
		50.3	0.084*	0.26*	0.278*	0.358*	0.222	0.736	1.018	1.116	0.198*
		50.4	-0.016*	0.36*	0.278*	0.358*	0.322	0.736	0.918	1.116	0.198*
		50.5	0.084*	0.36*	0.178*	0.258*	0.222	0.636	0.818	0.916	0.198*
		50.6	0.084*	0.26*	0.278*	0.258*	0.122	0.636	0.818	0.916	0.098*
		50.7	-0.016*	0.16*	0.278*	0.258*	0.122	0.636	0.718	0.916	0.198*
		50.8	0.084*	0.26*	0.278*	0.358*	0.222	0.736	0.818	1.016	0.198*
		50.9	0.184*	0.26*	0.278*	0.358*	0.322	0.736	0.918	1.016	0.198*
		51	0.084*	0.36*	0.178*	0.258*	0.322	0.636	0.918	1.016	0.198*
		51.1	0.084*	0.36*	0.278*	0.358*	0.222	0.736	0.818	0.916	0.298*
		51.2	0.084*	0.36*	0.378*	0.358*	0.122	0.636	0.818	0.916	0.298*
		51.3	0.084*	0.36*	0.378*	0.358*	0.222	0.636	0.718	0.916	0.298*
		51.4	0.084*	0.26*	0.178*	0.258*	0.222	0.636	0.818	1.016	0.198*
		51.5	0.184*	0.26*	0.178*	0.258*	0.222	0.636	0.918	1.016	0.198*
		51.6	0.184*	0.36*	0.278*	0.358*	0.322	0.736	0.918	1.016	0.198*
		51.7	0.184*	0.36*	0.278*	0.358*	0.222	0.636	0.918	0.916	0.198*
		51.8	0.084*	0.36*	0.278*	0.258*	0.222	0.636	0.818	1.016	0.298*
		51.9	0.084*	0.36*	0.278*	0.258*	0.222	0.636	0.718	0.916	0.298*
		52	-0.016*	0.26*	0.178*	0.258*	0.222	0.636	0.918	1.016	0.298*
		52.1	-0.016*	0.26*	0.178*	0.258*	0.222	0.636	0.918	1.016	0.298*
		52.2	0.084*	0.36*	0.178*	0.258*	0.322	0.636	0.918	0.916	0.298*
		52.3	0.184*	0.36*	0.378*	0.458*	0.122	0.636	0.818	0.916	0.398*
		52.4	0.084*	0.36*	0.278*	0.258*	0.222	0.636	0.718	0.916	0.398*
		52.5	0.084*	0.36*	0.278*	0.258*	0.222	0.636	0.818	1.016	0.398*
		52.6	-0.016*	0.26*	0.278*	0.258*	0.222	0.636	0.818	1.016	0.298*
		52.7	-0.016*	0.26*	0.178*	0.258*	0.322	0.636	0.918	1.016	0.298*
		52.8	-0.016*	0.26*	0.178*	0.258*	0.222	0.636	0.918	1.016	0.298*
		52.9	0.184*	0.36*	0.178*	0.258*	0.122	0.536	0.818	1.116	0.298*
		53	0.084*	0.36*	0.278*	0.258*	0.122	0.536	0.718	0.916	0.398*
		53.1	0.084*	0.46*	0.278*	0.258*	0.122	0.536	0.818	1.016	0.398*
		53.2	0.084*	0.46*	0.278*	0.258*	0.222	0.636	0.918	1.016	0.398*
		53.3	-0.016*	0.36*	0.178*	0.258*	0.222	0.636	0.918	1.016	0.398*
		53.4	-0.016*	0.26*	0.178*	0.258*	0.322	0.636	0.818	1.016	0.398*
		53.5	-0.016*	0.26*	0.278*	0.258*	0.222	0.736	0.818	0.916	0.298*
		53.6	0.084*	0.36*	0.178*	0.258*	0.122	0.536	0.818	1.016	0.398*
		53.7	0.084*	0.36*	0.178*	0.258*	0.122	0.536	0.718	0.916	0.398*
		53.8	0.084*	0.36*	0.178*	0.258*	0.222	0.636	0.818	1.016	0.398*
		53.9	-0.016*	0.26*	0.178*	0.258*	0.222	0.636	0.918	1.016	0.398*
		54	-0.016*	0.36*	0.178*	0.258*	0.222	0.636	0.818	1.016	0.398*
		54.1	-0.016*	0.26*	0.278*	0.258*	0.322	0.736	0.818	1.016	0.398*
		54.2	-0.016*	0.26*	0.278*	0.358*	0.122	0.636	0.818	1.016	0.398*
		54.3	-0.016*	0.26*	0.178*	0.258*	0.222	0.636	0.718	0.916	0.298*
		54.4	-0.016*	0.26*	0.178*	0.258*	0.222	0.636	0.718	0.916	0.298*
		54.5	0.084*	0.36*	0.178*	0.258*	0.222	0.636	0.718	0.916	0.398*
		54.6	-0.016*	0.26*	0.078*	0.158*	0.222	0.636	0.718	0.916	0.498*
		54.7	-0.016*	0.26*	0.178*	0.258*	0.122	0.536	0.718	0.916	0.398*
		54.8	-0.016*	0.26*	0.278*	0.258*	0.222	0.636	0.718	0.916	0.398*
		54.9	-0.016*	0.26*	0.178*	0.158*	0.122	0.636	0.818	0.916	0.298*
		55	-0.016*	0.26*	0.178*	0.158*	0.222	0.736	0.718	0.816	0.298*
		55.1	0.084*	0.26*	0.178*	0.258*	0.222	0.736	0.718	0.916	0.298*
		55.2	-0.116*	0.16*	0.178*	0.258*	0.222	0.636	0.718	0.916	0.398*
		55.3	-0.016*	0.26*	0.178*	0.358*	0.222	0.636	0.718	0.916	0.398*
		55.4	-0.016*	0.36*	0.278*	0.258*	0.122	0.536	0.718	0.916	0.498*
		55.5	-0.016*	0.36*	0.178*	0.158*	0.122	0.536	0.718	0.916	0.398*
		55.6	-0.016*	0.26*	0.178*	0.258*	0.122	0.636	0.718	0.816	0.298*
		55.7	-0.016*	0.26*	0.178*	0.258*	0.122	0.636	0.618	0.716	0.298*
		55.8	-0.016*	0.16*	0.178*	0.258*	0.222	0.636	0.618	0.816	0.298*
		55.9	0.084*	0.26*	0.178*	0.258*	0.122	0.536	0.618	0.816	0.298*
		56	-0.016*	0.26*	0.178*	0.258*	0.122	0.536	0.618	0.816	0.398*
		56.1	-0.016*	0.26*	-0.022*	0.058*	0.122	0.536	0.718	0.816	0.398*
		56.2	-0.016*	0.26*	0.178*	0.158*	0.022	0.536	0.618	0.816	0.398*
		56.3	0.084*	0.36*	0.178*	0.158*	0.122	0.536	0.618	0.816	0.298*
		56.4	0.084*	0.36*	0.178*	0.258*	0.122	0.536	0.618	0.716	0.298*
		56.5	0.084*	0.26*	0.178*	0.258*	0.122	0.636	0.618	0.716	0.398*
		56.6	-0.116*	0.16*	0.178*	0.258*	0.022	0.436	0.618	0.816	0.398*
		56.7	-0.016*	0.26*	0.178*	0.258*	0.122	0.536	0.618	0.816	0.398*
		56.8	-0.016*	0.26*	0.178*	0.258*	0.122	0.536	0.718	0.816	0.398*
		56.9	-0.016*	0.26*	0.178*	0.158*	0.122	0.536	0.618	0.716	0.398*
		57	0.084*	0.26*	0.178*	0.158*	0.022	0.536	0.618	0.716	0.298*
		57.1	0.084*	0.26*	0.178*	0.258*	0.022	0.636	0.518	0.616	0.198*
		57.2	0.084*	0.36*	0.178*	0.258*	0.022	0.536	0.518	0.616	0.198*
		57.3	-0.016*	0.26*	0.178*	0.258*	0.022	0.536	0.518	0.616	0.198*
		57.4	-0.016*	0.26*	0.178*	0.258*	0.122	0.636	0.618	0.616	0.298*
		57.5	0.084*	0.36*	0.178*	0.158*	0.122	0.536	0.718	0.716	0.298*
		57.6	-0.016*	0.36*	0.178*	0.158*	0.122	0.536	0.618	0.716	0.298*
		57.7	0.084*	0.26*	0.178*	0.058*	0.122	0.536	0.618	0.716	0.398*
		57.8	0.084*	0.26*	0.278*	0.258*	-0.078	0.436	0.618	0.716	0.398*
		57.9	0.084*	0.26*	0.278*	0.258*	0.022	0.436	0.518	0.616	0.298*
		58	-0.016*	0.16*	0.178*	0.258*	0.022	0.536	0.518	0.516	0.298*
		58.1	-0.016*	0.26*	0.178*	0.258*	0.122	0.636	0.618	0.516	0.298*
		58.2	-0.016*	0.26*	0.178*	0.258*	0.122	0.636	0.618	0.516	0.298*
		58.3	0.184*	0.36*	0.178*	0.058*	0.122	0.636	0.618	0.616	0.298*
		58.4	0.084*	0.36*	0.278*	0.158*	0.122	0.536	0.718	0.616	0.298*
		58.5	0.084*	0.36*	0.278*	0.258*	0.022	0.436	0.618	0.616	0.398*
		58.6	0.084*	0.26*	0.278*	0.258*	0.022	0.436	0.618	0.616	0.398*
		58.7	0.084*	0.26*	0.278*	0.258*	0.122	0.436	0.518	0.516	0.298*
		58.8	-0.016*	0.16*	0.278*	0.258*	0.122	0.536	0.518	0.516	0.298*
		58.9	-0.016*	0.16*	0.378*	0.258*	0.122	0.536	0.618	0.416	0.298*
		59	-0.016*	0.26*	0.378*	0.258*	0.122	0.636	0.618	0.416	0.298*
		59.1	0.084*	0.26*	0.378*	0.258*	0.022	0.536	0.618	0.416	0.298*
		59.2	0.184*	0.36*	0.378*	0.358*	0.022	0.436	0.518	0.416	0.398*
		59.3	0.184*	0.36*	0.378*	0.358*	0.122	0.536	0.618	0.616	0.398*
		59.4	0.184*	0.36*	0.378*	0.358*	0.122	0.536	0.618	0.516	0.298*
		59.5	0.084*	0.16*	0.278*	0.258*	0.222	0.536	0.718	0.516	0.298*
		59.6	-0.016*	0.16*	0.278*	0.258*	0.222	0.536	0.618	0.416	0.298*
		59.7	-0.016*	0.16*	0.278*	0.258*	0.122	0.536	0.618	0.416	0.298*
		59.8	0.084*	0.26*	0.278*	0.258*	0.022	0.436	0.618	0.416	0.398*
		59.9	0.084*	0.26*	0.278*	0.258*	0.122	0.536	0.518	0.416	0.398*
		60	0.084*	0.26*	0.378*	0.358*	0.122	0.636	0.518	0.516	0.398*
		60.1	0.184*	0.36*	0.378*	0.258*	0.222	0.636	0.518	0.416	0.398*
		60.2	0.184*	0.36*	0.378*	0.258*	0.122	0.536	0.618	0.516	0.298*
		60.3	0.184*	0.26*	0.378*	0.258*	0.122	0.536	0.718	0.516	0.298*
		60.4	0.084*	0.16*	0.278*	0.158*	0.122	0.536	0.718	0.516	0.298*
		60.5	0.084*	0.16*	0.378*	0.258*	0.122	0.536	0.718	0.516	0.298*
		60.6	0.084*	0.16*	0.378*	0.258*	0.022	0.436	0.618	0.416	0.198*
		60.7	-0.016*	0.16*	0.278*	0.258*	0.022	0.436	0.618	0.416	0.298*
		60.8	-0.016*	0.26*	0.278*	0.358*	0.222	0.536	0.518	0.516	0.298*
		60.9	0.084*	0.26*	0.378*	0.358*	0.222	0.536	0.518	0.416	0.298*
		61	0.084*	0.26*	0.378*	0.358*	0.122	0.536	0.618	0.416	0.298*
		61.1	-0.016*	0.16*	0.378*	0.258*	0.122	0.536	0.618	0.416	0.298*
		61.2	0.084*	0.16*	0.378*	0.258*	0.022	0.436	0.618	0.416	0.298*
		61.3	0.084*	0.16*	0.378*	0.258*	0.022	0.436	0.718	0.516	0.398*
		61.4	0.084*	0.16*	0.278*	0.158*	0.122	0.436	0.618	0.416	0.398*
		61.5	-0.016*	0.26*	0.378*	0.358*	0.122	0.436	0.518	0.316	0.298*
		61.6	-0.016*	0.26*	0.378*	0.358*	0.122	0.436	0.518	0.316	0.298*
		61.7	0.084*	0.26*	0.378*	0.358*	0.122	0.536	0.518	0.416	0.298*
		61.8	0.084*	0.26*	0.478*	0.358*	0.122	0.536	0.618	0.416	0.298*
		61.9	0.184*	0.26*	0.478*	0.358*	0.122	0.536	0.618	0.416	0.298*
		62	0.084*	0.16*	0.378*	0.358*	0.122	0.536	0.618	0.416	0.198*
		62.1	0.084*	0.16*	0.378*	0.358*	0.122	0.536	0.518	0.416	0.198*
		62.2	0.084*	0.16*	0.378*	0.258*	0.122	0.436	0.518	0.416	0.398*
		62.3	0.084*	0.26*	0.278*	0.158*	0.122	0.336	0.518	0.416	0.398*
		62.4	0.084*	0.26*	0.278*	0.258*	0.122	0.336	0.518	0.316	0.298*
		62.5	0.084*	0.26*	0.278*	0.258*	0.022	0.336	0.518	0.316	0.298*
		62.6	-0.016*	0.26*	0.278*	0.258*	0.022	0.436	0.518	0.416	0.298*
		62.7	-0.016*	0.26*	0.378*	0.358*	0.022	0.436	0.518	0.416	0.198*
		62.8	-0.016*	0.16*	0.378*	0.358*	0.122	0.536	0.618	0.416	0.198*
		62.9	0.084*	0.16*	0.278*	0.158*	0.222	0.536	0.618	0.416	0.198*
		63	0.084*	0.16*	0.378*	0.258*	0.122	0.436	0.618	0.416	0.198*
		63.1	0.084*	0.26*	0.378*	0.258*	0.122	0.336	0.518	0.416	0.198*
		63.2	0.084*	0.26*	0.278*	0.258*	0.122	0.336	0.418	0.316	0.298*
		63.3	0.084*	0.26*	0.278*	0.258*	0.122	0.336	0.418	0.216	0.298*
		63.4	-0.116*	0.16*	0.278*	0.258*	0.122	0.436	0.518	0.316	0.298*
		63.5	-0.116*	0.16*	0.278*	0.258*	0.122	0.436	0.518	0.316	0.298*
		63.6	-0.116*	0.16*	0.278*	0.258*	0.122	0.436	0.618	0.316	0.198*
		63.7	-0.016*	0.16*	0.178*	0.158*	0.122	0.436	0.618	0.416	0.198*
		63.8	0.084*	0.36*	0.278*	0.058*	0.122	0.436	0.518	0.316	0.198*
		63.9	0.084*	0.36*	0.378*	0.158*	0.122	0.436	0.518	0.316	0.198*
		64	0.084*	0.36*	0.278*	0.258*	0.122	0.336	0.518	0.316	0.298*
		64.1	0.084*	0.36*	0.278*	0.258*	0.122	0.336	0.518	0.316	0.298*
		64.2	0.084*	0.36*	0.278*	0.258*	0.122	0.336	0.418	0.216	0.198*
		64.3	0.084*	0.26*	0.278*	0.258*	0.122	0.336	0.418	0.216	0.198*
		64.4	-0.016*	0.16*	0.178*	0.158*	0.122	0.436	0.418	0.216	0.298*
		64.5	-0.016*	0.16*	0.178*	0.158*	0.122	0.436	0.518	0.216	0.198*
		64.6	0.084*	0.36*	0.178*	0.258*	0.122	0.436	0.518	0.216	0.198*
		64.7	0.084*	0.36*	0.278*	0.158*	0.122	0.336	0.518	0.316	0.198*
		64.8	0.084*	0.36*	0.278*	0.158*	0.122	0.336	0.518	0.316	0.198*
		64.9	0.084*	0.36*	0.378*	0.258*	0.122	0.336	0.418	0.316	0.198*
		65	0.084*	0.36*	0.378*	0.258*	0.122	0.336	0.418	0.216	0.198*
		65.1	-0.016*	0.26*	0.378*	0.258*	0.122	0.336	0.418	0.216	0.198*
		65.2	0.084*	0.26*	0.278*	0.258*	0.222	0.336	0.418	0.216	0.298*
		65.3	0.084*	0.26*	0.278*	0.258*	0.122	0.336	0.418	0.216	0.298*
		65.4	0.084*	0.26*	0.178*	0.058*	0.122	0.336	0.518	0.316	0.298*
		65.5	-0.016*	0.26*	0.178*	0.158*	0.222	0.436	0.518	0.316	0.298*
		65.6	-0.016*	0.26*	0.178*	0.158*	0.222	0.436	0.518	0.216	0.198*
		65.7	-0.016*	0.26*	0.278*	0.158*	0.222	0.436	0.518	0.216	0.198*
		65.8	0.084*	0.36*	0.278*	0.158*	0.122	0.336	0.518	0.216	0.198*
		65.9	0.084*	0.26*	0.278*	0.158*	0.122	0.336	0.518	0.216	0.198*
		66	0.084*	0.26*	0.278*	0.158*	0.122	0.336	0.518	0.216	0.198*
		66.1	0.084*	0.26*	0.278*	0.158*	0.222	0.436	0.518	0.216	0.198*
		66.2	0.084*	0.36*	0.178*	0.158*	0.222	0.436	0.518	0.216	0.298*
		66.3	0.084*	0.36*	0.178*	0.158*	0.122	0.336	0.418	0.116	0.298*
		66.4	0.084*	0.36*	0.178*	0.158*	0.122	0.336	0.518	0.116	0.298*
		66.5	0.084*	0.36*	0.178*	0.158*	0.022	0.336	0.518	0.216	0.198*
		66.6	0.084*	0.36*	0.178*	0.158*	0.122	0.436	0.518	0.216	0.198*
		66.7	-0.016*	0.36*	0.278*	0.158*	0.122	0.436	0.518	0.216	0.098*
		66.8	-0.016*	0.36*	0.278*	0.158*	0.122	0.436	0.518	0.216	0.098*
		66.9	-0.016*	0.16*	0.278*	0.158*	0.122	0.436	0.518	0.216	0.098*
		67	0.084*	0.36*	0.278*	0.158*	0.222	0.436	0.618	0.216	0.198*
		67.1	0.084*	0.36*	0.278*	0.158*	0.222	0.436	0.518	0.216	0.198*
		67.2	0.084*	0.36*	0.178*	0.058*	0.222	0.436	0.418	0.216	0.198*
		67.3	0.084*	0.36*	0.178*	0.158*	0.222	0.436	0.418	0.216	0.298*
		67.4	0.084*	0.36*	0.078*	0.058*	0.222	0.436	0.418	0.216	0.298*
		67.5	0.084*	0.36*	0.178*	0.158*	0.222	0.536	0.418	0.216	0.098*
		67.6	0.084*	0.36*	0.178*	0.158*	0.122	0.536	0.418	0.216	0.098*
		67.7	-0.016*	0.26*	0.178*	0.158*	0.222	0.536	0.518	0.216	0.098*
		67.8	-0.116*	0.26*	0.178*	0.158*	0.222	0.536	0.618	0.316	0.098*
		67.9	-0.116*	0.36*	0.278*	0.158*	0.222	0.436	0.618	0.316	0.198*
		68	-0.016*	0.36*	0.278*	0.158*	0.222	0.436	0.518	0.216	0.198*
		68.1	-0.016*	0.36*	0.278*	0.158*	0.222	0.436	0.518	0.216	0.198*
		68.2	-0.016*	0.26*	0.278*	0.158*	0.222	0.436	0.518	0.216	0.198*
		68.3	0.084*	0.36*	0.178*	0.158*	0.122	0.436	0.418	0.316	0.198*
		68.4	0.084*	0.36*	0.178*	0.158*	0.122	0.436	0.418	0.316	0.098*
		68.5	0.084*	0.36*	0.178*	0.058*	0.122	0.436	0.418	0.216	0.098*
		68.6	-0.016*	0.26*	0.078*	0.058*	0.122	0.436	0.418	0.216	0.098*
		68.7	-0.016*	0.26*	0.078*	0.058*	0.222	0.536	0.418	0.216	0.198*
		68.8	-0.116*	0.26*	0.178*	0.158*	0.222	0.536	0.618	0.316	0.198*
		68.9	-0.116*	0.26*	0.278*	0.158*	0.222	0.536	0.618	0.316	0.198*
		69	-0.116*	0.26*	0.178*	0.058*	0.222	0.536	0.618	0.316	0.198*
		69.1	-0.016*	0.36*	0.178*	0.058*	0.222	0.536	0.618	0.416	0.198*
		69.2	-0.016*	0.26*	0.178*	0.058*	0.122	0.436	0.618	0.416	0.198*
		69.3	0.084*	0.36*	0.178*	0.058*	0.122	0.436	0.518	0.316	0.298*
		69.4	-0.016*	0.26*	0.178*	0.058*	0.122	0.336	0.418	0.316	0.198*
		69.5	-0.016*	0.26*	0.178*	0.158*	0.122	0.436	0.418	0.316	0.198*
		69.6	-0.016*	0.26*	0.178*	0.158*	0.122	0.436	0.518	0.416	0.198*
		69.7	-0.016*	0.26*	0.178*	0.158*	0.122	0.436	0.518	0.416	0.198*
		69.8	-0.116*	0.26*	0.178*	0.158*	0.122	0.436	0.518	0.416	0.198*
		69.9	-0.116*	0.26*	0.078*	0.058*	0.222	0.536	0.518	0.416	0.098*
		70	-0.116*	0.26*	0.078*	0.058*	0.222	0.436	0.618	0.416	0.198*
		70.1	-0.116*	0.26*	-0.022*	-0.042*	0.222	0.436	0.618	0.416	0.198*
		70.2	-0.116*	0.36*	0.078*	0.058*	0.122	0.336	0.518	0.416	0.198*
		70.3	-0.016*	0.36*	0.178*	0.058*	0.122	0.336	0.518	0.416	0.198*
		70.4	0.084*	0.36*	0.178*	0.158*	0.122	0.336	0.418	0.316	0.198*
		70.5	-0.016*	0.26*	0.178*	0.158*	0.122	0.336	0.418	0.316	0.098*
		70.6	-0.116*	0.26*	0.178*	0.158*	0.122	0.436	0.418	0.316	0.098*
		70.7	-0.116*	0.26*	0.178*	0.058*	0.122	0.436	0.418	0.316	0.098*
		70.8	-0.116*	0.26*	0.178*	0.058*	0.122	0.436	0.318	0.316	0.198*
		70.9	-0.016*	0.26*	0.178*	0.058*	0.022	0.336	0.418	0.316	0.298*
		71	-0.016*	0.26*	0.078*	0.058*	0.022	0.336	0.418	0.416	0.198*
		71.1	-0.016*	0.26*	0.078*	0.058*	0.022	0.336	0.518	0.416	0.198*
		71.2	-0.016*	0.26*	0.078*	0.058*	0.022	0.336	0.518	0.416	0.198*
		71.3	-0.116*	0.26*	0.078*	0.058*	0.022	0.236	0.518	0.416	0.198*
		71.4	-0.116*	0.16*	0.178*	0.058*	0.122	0.336	0.418	0.416	0.198*
		71.5	-0.216*	0.16*	0.178*	0.158*	0.122	0.336	0.318	0.316	0.198*
		71.6	-0.116*	0.16*	0.178*	0.158*	0.122	0.336	0.318	0.316	0.198*
		71.7	-0.116*	0.16*	0.178*	0.158*	0.022	0.236	0.418	0.416	0.198*
		71.8	-0.116*	0.16*	0.278*	0.258*	0.022	0.236	0.418	0.416	0.198*
		71.9	-0.116*	0.16*	0.178*	0.058*	0.022	0.336	0.418	0.416	0.198*
		72	-0.016*	0.26*	0.078*	0.058*	0.022	0.336	0.418	0.416	0.198*
		72.1	-0.116*	0.26*	0.078*	0.058*	0.122	0.336	0.418	0.316	0.198*
		72.2	-0.116*	0.26*	0.078*	0.058*	0.122	0.236	0.418	0.316	0.298*
		72.3	-0.116*	0.26*	0.078*	0.158*	0.022	0.236	0.518	0.416	0.198*
		72.4	-0.016*	0.26*	0.178*	0.158*	0.022	0.236	0.418	0.316	0.198*
		72.5	-0.016*	0.26*	0.178*	0.158*	0.022	0.236	0.418	0.316	0.198*
		72.6	-0.116*	0.16*	0.178*	0.158*	0.022	0.236	0.318	0.316	0.198*
		72.7	-0.116*	0.16*	0.278*	0.258*	0.022	0.236	0.418	0.316	0.198*
		72.8	-0.116*	0.16*	0.278*	0.258*	0.022	0.236	0.418	0.416	0.098*
		72.9	-0.216*	0.16*	0.178*	0.158*	0.022	0.236	0.418	0.416	0.098*
		73	-0.216*	0.16*	0.178*	0.058*	0.022	0.136	0.418	0.316	0.098*
		73.1	-0.116*	0.16*	0.178*	0.158*	-0.078	0.236	0.418	0.316	0.098*
		73.2	-0.116*	0.16*	0.178*	0.158*	0.022	0.236	0.418	0.316	0.098*
		73.3	-0.116*	0.26*	0.078*	0.158*	0.022	0.236	0.418	0.316	0.098*
		73.4	-0.116*	0.26*	0.078*	0.158*	-0.078	0.136	0.318	0.216	-0.002*
		73.5	-0.016*	0.26*	0.178*	0.158*	-0.078	0.136	0.418	0.216	0.098*
		73.6	-0.016*	0.26*	0.278*	0.258*	0.022	0.236	0.418	0.216	0.098*
		73.7	-0.016*	0.26*	0.278*	0.258*	-0.078	0.136	0.518	0.416	0.098*
		73.8	-0.016*	0.26*	0.278*	0.258*	-0.078	0.136	0.418	0.416	0.098*
		73.9	-0.016*	0.26*	0.078*	0.158*	0.022	0.136	0.418	0.416	-0.002*
		74	-0.216*	0.16*	0.078*	0.158*	0.022	0.136	0.418	0.316	-0.002*
		74.1	-0.216*	0.16*	0.078*	0.258*	0.022	0.236	0.418	0.316	0.098*
		74.2	-0.116*	0.26*	0.078*	0.258*	0.022	0.236	0.418	0.316	0.198*
		74.3	-0.116*	0.26*	0.178*	0.258*	0.022	0.236	0.418	0.316	0.198*
		74.4	-0.116*	0.26*	0.178*	0.258*	-0.078	0.136	0.318	0.316	0.198*
		74.5	-0.116*	0.16*	0.178*	0.158*	-0.078	0.136	0.418	0.316	0.198*
		74.6	-0.116*	0.16*	0.178*	0.158*	-0.078	0.136	0.418	0.316	0.198*
		74.7	-0.116*	0.16*	0.178*	0.258*	-0.078	0.036	0.418	0.316	0.198*
		74.8	-0.116*	0.16*	0.178*	0.258*	-0.078	0.136	0.418	0.316	0.098*
		74.9	-0.116*	0.26*	0.078*	0.158*	-0.078	0.136	0.418	0.316	0.098*
		75	-0.116*	0.26*	0.078*	0.158*	-0.078	0.236	0.418	0.216	-0.002*
		75.1	-0.216*	0.26*	0.078*	0.158*	-0.078	0.236	0.518	0.316	-0.002*
		75.2	-0.316*	0.16*	0.078*	0.258*	0.022	0.236	0.518	0.316	-0.002*
		75.3	-0.116*	0.26*	0.178*	0.258*	-0.078	0.136	0.518	0.416	-0.002*
		75.4	-0.116*	0.26*	0.178*	0.258*	-0.078	0.136	0.418	0.316	0.098*
		75.5	-0.116*	0.26*	0.178*	0.258*	-0.078	0.136	0.418	0.316	0.098*
		75.6	-0.116*	0.26*	0.178*	0.258*	-0.078	0.036	0.418	0.316	0.098*
		75.7	-0.116*	0.26*	0.178*	0.258*	-0.078	0.036	0.418	0.316	0.098*
		75.8	-0.116*	0.26*	0.178*	0.158*	-0.078	0.036	0.418	0.316	0.098*
		75.9	-0.116*	0.16*	0.178*	0.158*	-0.078	0.136	0.518	0.416	0.098*
		76	-0.116*	0.16*	0.078*	0.058*	-0.078	0.136	0.518	0.516	-0.002*
		76.1	-0.116*	0.26*	-0.022*	0.058*	0.122	0.236	0.518	0.516	-0.002*
		76.2	-0.116*	0.26*	-0.022*	0.058*	0.022	0.236	0.518	0.516	0.098*
		76.3	-0.116*	0.26*	0.078*	0.058*	-0.078	0.136	0.618	0.516	0.098*
		76.4	-0.216*	0.26*	0.078*	0.058*	-0.078	0.136	0.518	0.316	0.098*
		76.5	-0.216*	0.26*	0.078*	0.158*	-0.078	0.136	0.418	0.316	0.098*
		76.6	-0.016*	0.36*	0.178*	0.158*	-0.078	0.036	0.418	0.316	-0.002*
		76.7	-0.016*	0.36*	0.178*	0.258*	-0.078	0.036	0.418	0.316	-0.002*
		76.8	-0.016*	0.36*	0.178*	0.258*	-0.078	0.136	0.418	0.316	0.098*
		76.9	-0.116*	0.26*	0.078*	0.258*	-0.078	0.136	0.418	0.416	0.098*
		77	-0.116*	0.36*	-0.022*	0.058*	-0.078	0.136	0.418	0.416	0.098*
		77.1	-0.116*	0.26*	-0.022*	0.058*	-0.178	0.036	0.518	0.516	0.098*
		77.2	-0.116*	0.26*	-0.022*	0.058*	-0.178	0.036	0.518	0.516	0.098*
		77.3	-0.116*	0.26*	0.078*	0.058*	-0.178	0.036	0.518	0.516	0.098*
		77.4	-0.216*	0.26*	0.078*	0.058*	0.022	0.236	0.418	0.416	0.098*
		77.5	-0.216*	0.26*	0.078*	0.058*	0.022	0.236	0.318	0.416	0.098*
		77.6	-0.116*	0.46*	0.078*	0.058*	-0.078	0.236	0.318	0.416	-0.002*
		77.7	-0.016*	0.46*	0.078*	0.058*	-0.078	0.136	0.318	0.416	-0.002*
		77.8	-0.116*	0.36*	0.078*	0.058*	-0.078	0.136	0.318	0.416	-0.002*
		77.9	-0.116*	0.36*	0.078*	0.058*	-0.078	0.136	0.418	0.416	-0.002*
		78	-0.116*	0.36*	0.078*	0.058*	-0.078	0.136	0.418	0.416	-0.002*
		78.1	-0.216*	0.36*	0.178*	0.258*	-0.078	0.136	0.418	0.416	-0.002*
		78.2	-0.216*	0.36*	0.078*	0.158*	-0.078	0.236	0.418	0.516	-0.002*
		78.3	-0.216*	0.26*	0.078*	0.058*	-0.078	0.236	0.418	0.516	0.098*
		78.4	-0.216*	0.26*	0.078*	0.058*	-0.178	0.136	0.518	0.616	0.098*
		78.5	-0.216*	0.26*	0.078*	0.058*	-0.178	0.136	0.518	0.616	0.098*
		78.6	-0.216*	0.26*	0.078*	0.058*	-0.178	0.136	0.418	0.516	0.098*
		78.7	-0.216*	0.36*	0.178*	0.058*	0.022	0.236	0.418	0.416	0.098*
		78.8	-0.216*	0.36*	0.078*	0.058*	0.022	0.236	0.318	0.416	-0.002*
		78.9	-0.116*	0.36*	0.078*	0.058*	-0.078	0.236	0.318	0.416	-0.102*
		79	-0.116*	0.36*	0.078*	-0.042*	-0.078	0.136	0.418	0.416	-0.002*
		79.1	-0.116*	0.26*	0.078*	0.058*	-0.078	0.136	0.418	0.416	-0.002*
		79.2	-0.116*	0.26*	0.078*	0.058*	-0.078	0.136	0.418	0.416	-0.002*
		79.3	-0.216*	0.26*	0.078*	0.058*	-0.078	0.236	0.418	0.416	0.098*
		79.4	-0.216*	0.36*	0.078*	0.058*	-0.078	0.236	0.418	0.416	0.098*
		79.5	-0.216*	0.36*	0.078*	0.058*	0.022	0.236	0.318	0.416	0.098*
		79.6	-0.216*	0.36*	0.178*	0.058*	0.022	0.236	0.318	0.416	0.098*
		79.7	-0.216*	0.36*	0.178*	0.058*	-0.078	0.236	0.418	0.516	0.098*
		79.8	-0.216*	0.36*	0.178*	0.058*	-0.078	0.236	0.418	0.516	0.098*
		79.9	-0.216*	0.26*	0.178*	0.058*	-0.078	0.236	0.418	0.516	0.098*
		80	-0.216*	0.26*	0.278*	0.258*	-0.078	0.136	0.418	0.516	0.098*
		80.1	-0.216*	0.26*	0.278*	0.258*	-0.078	0.236	0.418	0.516	-0.002*
		80.2	-0.116*	0.26*	0.178*	0.158*	0.022	0.236	0.418	0.516	0.098*
		80.3	-0.216*	0.36*	0.078*	0.058*	0.022	0.236	0.318	0.416	-0.002*
		80.4	-0.216*	0.36*	0.078*	0.058*	-0.078	0.236	0.418	0.416	0.098*
		80.5	-0.216*	0.36*	0.078*	0.058*	-0.078	0.236	0.318	0.316	0.098*
		80.6	-0.216*	0.36*	0.078*	0.058*	-0.178	0.136	0.318	0.316	0.098*
		80.7	-0.216*	0.36*	0.178*	0.058*	-0.178	0.136	0.318	0.316	0.098*
		80.8	-0.316*	0.26*	0.178*	0.158*	-0.078	0.236	0.318	0.316	0.098*
		80.9	-0.316*	0.16*	0.178*	0.158*	-0.078	0.236	0.318	0.316	0.098*
		81	-0.316*	0.16*	0.278*	0.258*	0.022	0.236	0.318	0.316	0.098*
		81.1	-0.216*	0.26*	0.278*	0.258*	0.022	0.236	0.418	0.516	0.098*
		81.2	-0.216*	0.36*	0.278*	0.258*	0.022	0.236	0.418	0.516	0.198*
		81.3	-0.116*	0.36*	0.178*	0.158*	0.022	0.336	0.318	0.416	0.098*
		81.4	-0.216*	0.36*	0.178*	0.158*	0.022	0.336	0.418	0.416	0.098*
		81.5	-0.216*	0.36*	0.178*	0.158*	-0.078	0.336	0.418	0.416	-0.002*
		81.6	-0.216*	0.36*	0.178*	0.158*	-0.078	0.236	0.418	0.416	0.098*
		81.7	-0.216*	0.26*	0.078*	0.058*	0.022	0.236	0.418	0.416	0.098*
		81.8	-0.216*	0.26*	0.178*	0.058*	0.022	0.236	0.418	0.416	0.098*
		81.9	-0.316*	0.16*	0.178*	0.158*	0.022	0.236	0.418	0.416	0.098*
		82	-0.216*	0.26*	0.178*	0.158*	0.022	0.236	0.418	0.516	0.098*
		82.1	-0.216*	0.36*	0.178*	0.158*	0.122	0.336	0.418	0.516	0.198*
		82.2	-0.216*	0.36*	0.278*	0.258*	0.022	0.236	0.418	0.516	0.198*
		82.3	-0.216*	0.36*	0.178*	0.158*	0.022	0.236	0.318	0.416	0.198*
		82.4	-0.216*	0.36*	0.178*	0.158*	0.022	0.336	0.318	0.416	0.198*
		82.5	-0.116*	0.36*	0.178*	0.158*	0.022	0.336	0.318	0.416	0.198*
		82.6	-0.116*	0.36*	0.178*	0.158*	0.022	0.336	0.418	0.416	0.098*
		82.7	-0.116*	0.26*	0.178*	0.158*	0.022	0.336	0.518	0.516	-0.002*
		82.8	-0.116*	0.26*	0.178*	0.158*	0.122	0.336	0.518	0.516	-0.002*
		82.9	-0.116*	0.26*	0.178*	0.158*	0.122	0.236	0.518	0.516	-0.002*
		83	-0.116*	0.26*	0.178*	0.158*	0.122	0.236	0.418	0.416	-0.002*
		83.1	-0.116*	0.36*	0.178*	0.058*	0.122	0.236	0.418	0.416	0.098*
		83.2	-0.016*	0.46*	0.078*	0.058*	0.022	0.236	0.418	0.416	0.098*
		83.3	-0.016*	0.46*	0.078*	0.058*	-0.078	0.136	0.318	0.416	0.098*
		83.4	0.084*	0.46*	0.078*	0.158*	0.022	0.236	0.418	0.516	0.198*
		83.5	-0.016*	0.36*	0.178*	0.158*	0.022	0.236	0.418	0.516	0.198*
		83.6	-0.016*	0.36*	0.178*	0.158*	0.022	0.236	0.418	0.516	0.198*
		83.7	-0.016*	0.36*	0.178*	0.158*	0.122	0.236	0.418	0.516	0.198*
		83.8	-0.116*	0.36*	0.078*	0.058*	0.122	0.236	0.418	0.516	0.198*
		83.9	-0.116*	0.36*	0.078*	0.058*	0.122	0.336	0.418	0.516	0.098*
		84	-0.116*	0.36*	0.178*	0.158*	0.122	0.336	0.518	0.516	0.098*
		84.1	-0.116*	0.36*	0.178*	0.158*	0.122	0.336	0.518	0.416	0.098*
		84.2	-0.016*	0.36*	0.078*	0.158*	0.122	0.336	0.618	0.616	0.098*
		84.3	-0.016*	0.36*	0.178*	0.158*	0.122	0.336	0.518	0.516	0.098*
		84.4	-0.016*	0.36*	0.178*	0.158*	0.122	0.236	0.518	0.516	0.198*
		84.5	0.084*	0.46*	0.178*	0.158*	0.122	0.236	0.418	0.516	0.198*
		84.6	-0.016*	0.36*	0.178*	0.158*	0.222	0.336	0.418	0.516	0.198*
		84.7	-0.016*	0.36*	0.178*	0.158*	0.122	0.236	0.418	0.516	0.098*
		84.8	-0.016*	0.36*	0.178*	0.058*	0.122	0.236	0.518	0.616	0.098*
		84.9	-0.016*	0.26*	0.178*	0.158*	0.122	0.236	0.518	0.616	0.098*
		85	-0.016*	0.26*	-0.022*	0.058*	0.022	0.236	0.618	0.616	0.098*
		85.1	-0.016*	0.26*	0.078*	0.158*	0.022	0.236	0.618	0.616	0.198*
		85.2	0.084*	0.36*	0.078*	0.158*	0.022	0.236	0.618	0.516	0.198*
		85.3	0.084*	0.36*	0.078*	0.158*	0.022	0.236	0.618	0.616	0.198*
		85.4	0.084*	0.36*	0.178*	0.158*	0.122	0.236	0.618	0.616	0.098*
		85.5	-0.016*	0.36*	0.178*	0.158*	0.122	0.236	0.618	0.616	0.098*
		85.6	-0.016*	0.36*	0.178*	0.158*	0.222	0.336	0.518	0.516	0.098*
		85.7	0.084*	0.46*	0.178*	0.158*	0.222	0.436	0.518	0.516	0.198*
		85.8	-0.016*	0.36*	0.178*	0.158*	0.122	0.336	0.418	0.516	0.098*
		85.9	-0.016*	0.36*	0.178*	0.158*	0.122	0.336	0.518	0.616	0.098*
		86	0.084*	0.36*	0.178*	0.058*	0.122	0.336	0.518	0.516	0.098*
		86.1	0.084*	0.26*	0.078*	0.058*	0.122	0.236	0.618	0.516	0.198*
		86.2	0.084*	0.26*	0.078*	0.158*	0.122	0.236	0.618	0.516	0.198*
		86.3	0.084*	0.26*	0.178*	0.258*	0.222	0.236	0.618	0.516	0.198*
		86.4	0.084*	0.26*	0.078*	0.158*	0.122	0.236	0.618	0.516	0.198*
		86.5	0.084*	0.36*	0.078*	0.158*	0.122	0.236	0.618	0.516	0.198*
		86.6	0.084*	0.36*	0.078*	0.158*	0.122	0.236	0.418	0.416	0.198*
		86.7	-0.016*	0.26*	0.178*	0.158*	0.022	0.136	0.418	0.416	-0.002*
		86.8	-0.016*	0.26*	0.178*	0.258*	0.022	0.136	0.418	0.416	0.098*
		86.9	-0.016*	0.26*	0.178*	0.258*	0.122	0.236	0.418	0.516	0.098*
		87	0.084*	0.26*	0.178*	0.258*	0.122	0.136	0.418	0.516	0.098*
		87.1	0.184*	0.36*	0.178*	0.258*	0.122	0.236	0.518	0.516	0.098*
		87.2	0.084*	0.26*	0.178*	0.258*	0.222	0.236	0.518	0.516	0.198*
		87.3	0.084*	0.26*	0.178*	0.158*	0.222	0.236	0.618	0.616	0.198*
		87.4	0.084*	0.26*	0.278*	0.258*	0.222	0.236	0.618	0.516	0.198*
		87.5	-0.016*	0.16*	0.278*	0.258*	0.222	0.236	0.518	0.516	0.198*
		87.6	-0.016*	0.16*	0.278*	0.258*	0.222	0.236	0.518	0.516	0.298*
		87.7	-0.016*	0.26*	0.078*	0.258*	0.222	0.236	0.518	0.516	0.198*
		87.8	-0.016*	0.26*	0.178*	0.258*	0.222	0.236	0.518	0.516	0.198*
		87.9	0.084*	0.26*	0.178*	0.258*	0.122	0.136	0.518	0.516	0.098*
		88	0.084*	0.26*	0.178*	0.258*	0.022	0.136	0.518	0.516	0.098*
		88.1	0.084*	0.26*	0.178*	0.258*	0.022	0.036	0.618	0.616	0.098*
		88.2	0.184*	0.36*	0.178*	0.258*	0.122	0.136	0.618	0.616	0.098*
		88.3	0.184*	0.36*	0.178*	0.258*	0.122	0.136	0.618	0.516	0.198*
		88.4	0.184*	0.36*	0.278*	0.358*	0.122	0.236	0.518	0.416	0.198*
		88.5	0.084*	0.26*	0.278*	0.358*	0.122	0.236	0.618	0.516	0.198*
		88.6	0.084*	0.26*	0.278*	0.358*	0.122	0.236	0.518	0.516	0.198*
		88.7	0.184*	0.26*	0.178*	0.358*	0.222	0.236	0.518	0.516	0.198*
		88.8	0.084*	0.16*	0.078*	0.258*	0.222	0.236	0.518	0.516	0.198*
		88.9	0.084*	0.16*	0.078*	0.258*	0.122	0.136	0.518	0.516	0.198*
		89	0.084*	0.16*	0.178*	0.258*	0.122	0.136	0.518	0.516	0.198*
		89.1	0.084*	0.16*	0.178*	0.258*	0.122	0.036	0.518	0.516	0.098*
		89.2	0.084*	0.16*	0.178*	0.258*	0.122	0.136	0.518	0.516	0.098*
		89.3	0.084*	0.16*	0.178*	0.258*	0.122	0.136	0.618	0.416	0.198*
		89.4	0.184*	0.26*	0.178*	0.358*	0.022	0.136	0.618	0.416	0.198*
		89.5	0.084*	0.26*	0.178*	0.358*	0.122	0.236	0.618	0.416	0.298*
		89.6	0.084*	0.26*	0.178*	0.358*	0.122	0.236	0.518	0.316	0.198*
		89.7	0.084*	0.26*	0.178*	0.358*	0.122	0.236	0.518	0.316	0.198*
		89.8	0.084*	0.26*	0.278*	0.358*	0.122	0.236	0.418	0.416	0.198*
		89.9	0.084*	0.26*	0.278*	0.358*	0.222	0.236	0.418	0.416	0.198*
		90	0.184*	0.26*	0.278*	0.258*	0.222	0.236	0.418	0.416	0.198*
		90.1	0.084*	0.26*	0.278*	0.258*	0.222	0.336	0.518	0.516	0.198*
		90.2	0.084*	0.26*	0.278*	0.258*	0.222	0.336	0.518	0.516	0.298*
		90.3	0.084*	0.26*	0.178*	0.258*	0.122	0.236	0.618	0.516	0.298*
		90.4	0.084*	0.16*	0.178*	0.258*	0.122	0.136	0.618	0.516	0.198*
		90.5	-0.016*	0.06*	0.178*	0.258*	0.122	0.136	0.618	0.516	0.198*
		90.6	-0.016*	0.06*	0.178*	0.258*	0.122	0.136	0.618	0.416	0.098*
		90.7	-0.016*	0.06*	0.278*	0.258*	0.122	0.136	0.618	0.416	0.098*
		90.8	0.084*	0.16*	0.278*	0.258*	0.222	0.236	0.618	0.416	0.098*
		90.9	0.084*	0.16*	0.278*	0.358*	0.222	0.336	0.618	0.416	0.098*
		91	0.084*	0.26*	0.278*	0.358*	0.222	0.336	0.618	0.416	0.198*
		91.1	0.084*	0.26*	0.278*	0.358*	0.222	0.336	0.618	0.416	0.298*
		91.2	0.084*	0.26*	0.278*	0.358*	0.122	0.336	0.618	0.516	0.298*
		91.3	0.184*	0.26*	0.278*	0.358*	0.122	0.336	0.518	0.416	0.298*
		91.4	0.184*	0.26*	0.378*	0.358*	0.122	0.336	0.518	0.316	0.198*
		91.5	0.084*	0.16*	0.278*	0.158*	0.022	0.236	0.518	0.316	0.198*
		91.6	0.084*	0.16*	0.178*	0.158*	0.022	0.236	0.518	0.316	0.198*
		91.7	0.084*	0.06*	0.178*	0.158*	0.022	0.236	0.518	0.316	0.198*
		91.8	0.084*	0.06*	0.178*	0.158*	0.122	0.236	0.518	0.316	0.198*
		91.9	0.084*	0.06*	0.278*	0.258*	0.222	0.236	0.618	0.316	0.198*
		92	0.184*	0.16*	0.278*	0.358*	0.222	0.236	0.618	0.316	0.198*
		92.1	0.184*	0.26*	0.278*	0.358*	0.222	0.336	0.618	0.316	0.198*
		92.2	0.184*	0.26*	0.278*	0.358*	0.222	0.336	0.618	0.416	0.198*
		92.3	0.084*	0.26*	0.378*	0.358*	0.222	0.336	0.618	0.416	0.198*
		92.4	0.084*	0.26*	0.378*	0.258*	0.222	0.336	0.618	0.416	0.198*
		92.5	0.084*	0.26*	0.378*	0.258*	0.122	0.236	0.618	0.416	0.198*
		92.6	-0.016*	0.16*	0.378*	0.258*	0.122	0.236	0.618	0.416	0.198*
		92.7	-0.016*	0.16*	0.278*	0.258*	0.022	0.236	0.518	0.316	0.198*
		92.8	0.084*	0.26*	0.178*	0.158*	0.122	0.236	0.418	0.216	0.198*
		92.9	0.084*	0.26*	0.178*	0.158*	0.122	0.236	0.418	0.216	0.198*
		93	0.084*	0.26*	0.178*	0.158*	0.122	0.236	0.418	0.216	0.098*
		93.1	0.084*	0.26*	0.178*	0.158*	0.122	0.236	0.418	0.216	0.098*
		93.2	0.184*	0.36*	0.178*	0.158*	0.122	0.336	0.418	0.216	0.098*
		93.3	0.184*	0.26*	0.178*	0.158*	0.222	0.336	0.418	0.216	-0.002*
		93.4	0.184*	0.36*	0.278*	0.158*	0.222	0.336	0.518	0.216	-0.002*
		93.5	0.084*	0.36*	0.278*	0.258*	0.222	0.336	0.518	0.216	-0.002*
		93.6	-0.016*	0.26*	0.278*	0.258*	0.122	0.236	0.518	0.216	-0.002*
		93.7	-0.016*	0.26*	0.278*	0.258*	0.122	0.236	0.618	0.416	0.098*
		93.8	-0.016*	0.26*	0.178*	0.158*	0.122	0.236	0.618	0.416	0.098*
		93.9	-0.016*	0.26*	0.278*	0.258*	0.122	0.236	0.618	0.316	0.098*
		94	-0.016*	0.26*	0.278*	0.158*	0.122	0.236	0.518	0.316	0.098*
		94.1	-0.016*	0.26*	0.278*	0.158*	0.122	0.236	0.418	0.216	0.098*
		94.2	0.084*	0.26*	0.278*	0.158*	0.222	0.336	0.418	0.216	-0.002*
		94.3	0.084*	0.36*	0.278*	0.158*	0.222	0.336	0.418	0.216	0.098*
		94.4	0.184*	0.46*	0.278*	0.158*	0.222	0.336	0.418	0.216	0.098*
		94.5	0.184*	0.46*	0.178*	0.158*	0.222	0.336	0.418	0.216	0.098*
		94.6	0.184*	0.46*	0.078*	0.058*	0.222	0.336	0.518	0.216	0.098*
		94.7	0.084*	0.26*	0.078*	0.158*	0.122	0.236	0.518	0.316	0.098*
		94.8	0.084*	0.26*	0.178*	0.158*	0.022	0.236	0.518	0.316	0.098*
		94.9	0.084*	0.26*	0.178*	0.158*	0.122	0.236	0.518	0.316	-0.002*
		95	0.084*	0.26*	0.178*	0.158*	0.122	0.236	0.518	0.316	-0.002*
		95.1	0.084*	0.26*	0.278*	0.258*	0.122	0.236	0.518	0.316	-0.002*
		95.2	-0.016*	0.26*	0.278*	0.258*	0.122	0.236	0.518	0.316	-0.002*
		95.3	-0.016*	0.26*	0.278*	0.258*	0.122	0.236	0.518	0.316	0.098*
		95.4	0.084*	0.26*	0.278*	0.158*	0.122	0.236	0.518	0.316	0.098*
		95.5	0.184*	0.36*	0.278*	0.158*	0.122	0.136	0.318	0.216	-0.002*
		95.6	0.184*	0.46*	0.278*	0.158*	0.122	0.136	0.318	0.216	-0.002*
		95.7	0.184*	0.46*	0.078*	0.058*	0.122	0.236	0.318	0.216	-0.002*
		95.8	0.184*	0.46*	0.078*	0.058*	0.022	0.136	0.318	0.216	-0.002*
		95.9	0.084*	0.36*	0.078*	0.158*	0.022	0.136	0.418	0.316	-0.002*
		96	0.084*	0.36*	0.078*	0.158*	0.022	0.136	0.518	0.316	-0.002*
		96.1	0.084*	0.36*	0.078*	0.158*	0.022	0.136	0.518	0.416	-0.002*
		96.2	0.084*	0.36*	0.078*	0.158*	0.022	0.136	0.518	0.416	0.098*
		96.3	0.084*	0.36*	0.078*	0.158*	0.122	0.136	0.518	0.416	0.098*
		96.4	0.084*	0.36*	0.078*	0.158*	0.122	0.136	0.518	0.416	0.098*
		96.5	0.084*	0.36*	0.078*	0.158*	0.222	0.236	0.418	0.316	0.098*
		96.6	-0.016*	0.26*	0.078*	0.158*	0.222	0.236	0.318	0.316	0.098*
		96.7	-0.016*	0.26*	0.078*	0.158*	0.222	0.336	0.318	0.316	0.098*
		96.8	-0.016*	0.16*	0.078*	0.158*	0.122	0.336	0.318	0.316	0.098*
		96.9	-0.016*	0.16*	0.178*	0.158*	0.122	0.336	0.318	0.316	0.098*
		97	-0.016*	0.16*	0.178*	0.158*	0.022	0.136	0.318	0.216	0.098*
		97.1	-0.016*	0.16*	0.178*	0.158*	0.022	0.136	0.418	0.216	0.098*
		97.2	-0.016*	0.16*	0.178*	0.158*	0.022	0.136	0.418	0.216	0.098*
		97.3	-0.016*	0.16*	0.178*	0.158*	0.022	0.136	0.418	0.216	0.098*
		97.4	-0.016*	0.26*	0.178*	0.158*	0.122	0.136	0.418	0.216	-0.002*
		97.5	0.084*	0.36*	0.178*	0.058*	0.122	0.136	0.418	0.216	-0.002*
		97.6	0.084*	0.36*	0.178*	0.058*	0.122	0.136	0.518	0.316	-0.002*
		97.7	0.084*	0.36*	0.078*	-0.042*	0.122	0.136	0.518	0.316	-0.002*
		97.8	0.084*	0.36*	-0.022*	-0.042*	0.122	0.136	0.318	0.216	-0.002*
		97.9	0.084*	0.36*	-0.022*	0.058*	0.122	0.136	0.318	0.316	0.098*
		98	0.084*	0.36*	-0.022*	0.058*	0.022	0.136	0.318	0.316	0.098*
		98.1	0.084*	0.26*	-0.022*	0.058*	0.022	0.136	0.318	0.316	0.098*
		98.2	0.084*	0.26*	0.078*	0.158*	0.022	0.136	0.318	0.316	-0.002*
		98.3	0.084*	0.26*	0.078*	0.158*	0.022	0.136	0.318	0.316	-0.002*
		98.4	0.084*	0.26*	0.078*	0.158*	-0.078	0.136	0.318	0.316	0.098*
		98.5	0.084*	0.26*	0.178*	0.158*	-0.078	0.136	0.418	0.316	0.098*
		98.6	0.084*	0.26*	0.178*	0.158*	-0.078	0.136	0.418	0.316	0.098*
		98.7	-0.016*	0.16*	0.178*	0.158*	-0.078	0.136	0.418	0.316	0.098*
		98.8	-0.016*	0.16*	0.178*	0.158*	-0.078	0.036	0.418	0.316	0.098*
		98.9	-0.016*	0.16*	0.178*	0.158*	-0.078	0.036	0.418	0.316	0.198*
		99	0.084*	0.26*	0.178*	0.158*	0.022	0.036	0.418	0.316	0.198*
		99.1	0.184*	0.36*	0.178*	0.158*	0.022	0.036	0.418	0.316	0.098*
		99.2	0.184*	0.36*	0.178*	0.058*	0.022	0.036	0.418	0.416	0.098*
		99.3	0.184*	0.36*	0.178*	0.058*	-0.078	-0.064	0.418	0.416	0.098*
		99.4	0.184*	0.36*	0.178*	0.058*	-0.078	-0.064	0.418	0.416	0.098*
		99.5	0.184*	0.36*	0.078*	0.058*	-0.078	-0.064	0.418	0.416	0.098*
		99.6	0.184*	0.26*	0.078*	0.058*	-0.078	-0.064	0.318	0.416	0.098*
		99.7	0.184*	0.26*	0.078*	0.058*	-0.078	0.036	0.418	0.416	0.098*
		99.8	0.184*	0.26*	0.078*	0.058*	-0.078	0.036	0.418	0.416	0.098*
		99.9	0.184*	0.26*	0.078*	0.058*	0.022	0.136	0.418	0.416	0.098*
		100	0.084*	0.26*	0.078*	0.058*	-0.078	0.136	0.418	0.416	0.098*
		100.1	0.084*	0.26*	-0.022*	0.058*	-0.078	0.136	0.418	0.416	0.098*
		100.2	0.084*	0.16*	0.078*	0.058*	-0.078	0.136	0.418	0.316	0.098*
		100.3	0.084*	0.16*	0.178*	0.158*	0.022	0.036	0.318	0.216	0.198*
		100.4	0.084*	0.16*	0.178*	0.158*	0.022	0.036	0.318	0.216	0.298*
		100.5	0.084*	0.26*	0.178*	0.158*	-0.078	-0.064	0.318	0.216	0.198*
		100.6	0.084*	0.26*	0.178*	0.158*	-0.078	-0.064	0.318	0.216	0.098*
		100.7	0.084*	0.26*	0.178*	0.158*	-0.078	-0.064	0.318	0.316	0.098*
		100.8	0.084*	0.26*	0.178*	0.058*	-0.078	0.036	0.418	0.316	0.098*
		100.9	0.084*	0.26*	0.178*	0.058*	-0.078	0.036	0.418	0.316	0.098*
		101	0.184*	0.36*	0.178*	0.058*	-0.078	0.036	0.418	0.316	0.098*
		101.1	0.184*	0.36*	0.178*	0.058*	-0.078	0.036	0.318	0.316	0.098*
		101.2	0.284*	0.36*	0.078*	-0.042*	0.022	0.136	0.318	0.316	0.098*
		101.3	0.284*	0.36*	0.078*	0.058*	0.022	0.136	0.318	0.316	0.098*
		101.4	0.284*	0.36*	0.078*	0.058*	0.022	0.136	0.318	0.316	0.098*
		101.5	0.284*	0.36*	0.078*	0.058*	0.022	0.136	0.318	0.216	0.098*
		101.6	0.184*	0.26*	0.178*	0.058*	0.022	0.136	0.318	0.316	0.098*
		101.7	0.184*	0.26*	0.178*	0.058*	0.022	0.136	0.318	0.316	0.098*
		101.8	0.184*	0.16*	0.178*	0.058*	0.022	0.136	0.318	0.316	0.198*
		101.9	0.184*	0.16*	0.178*	0.058*	0.022	0.136	0.318	0.316	0.198*
		102	0.184*	0.16*	0.178*	0.058*	-0.078	0.036	0.318	0.316	0.198*
		102.1	0.184*	0.16*	0.178*	-0.042*	-0.078	0.036	0.218	0.216	0.298*
		102.2	0.184*	0.26*	0.078*	-0.042*	-0.078	0.036	0.318	0.316	0.298*
		102.3	0.184*	0.26*	0.078*	-0.042*	-0.078	0.036	0.318	0.316	0.198*
		102.4	0.184*	0.36*	0.078*	-0.042*	-0.078	0.036	0.418	0.316	0.198*
		102.5	0.184*	0.36*	0.078*	-0.042*	-0.078	0.036	0.418	0.316	0.098*
		102.6	0.184*	0.36*	0.078*	0.058*	-0.078	0.136	0.418	0.316	0.098*
		102.7	0.184*	0.36*	0.078*	0.058*	-0.078	0.136	0.418	0.316	0.098*
		102.8	0.184*	0.36*	0.078*	0.058*	-0.078	0.136	0.418	0.316	0.098*
		102.9	0.184*	0.36*	0.178*	0.058*	0.122	0.236	0.418	0.316	0.098*
		103	0.084*	0.26*	0.178*	0.058*	0.122	0.236	0.418	0.316	0.098*
		103.1	0.084*	0.26*	0.178*	0.058*	0.122	0.236	0.418	0.316	0.198*
		103.2	0.084*	0.36*	0.178*	0.058*	0.122	0.236	0.418	0.316	0.198*
		103.3	0.084*	0.36*	0.178*	0.058*	0.122	0.236	0.418	0.316	0.198*
		103.4	0.084*	0.36*	0.178*	0.058*	0.122	0.136	0.418	0.316	0.298*
		103.5	0.084*	0.36*	0.178*	0.058*	0.122	0.136	0.518	0.316	0.298*
		103.6	0.084*	0.36*	0.178*	-0.042*	0.022	0.036	0.418	0.216	0.198*
		103.7	0.184*	0.36*	0.078*	-0.042*	-0.078	0.036	0.418	0.216	0.198*
		103.8	0.184*	0.36*	0.078*	-0.042*	-0.078	0.036	0.418	0.216	0.198*
		103.9	0.284*	0.46*	0.078*	-0.042*	-0.078	0.036	0.418	0.216	0.198*
		104	0.284*	0.36*	0.078*	-0.042*	-0.078	0.036	0.418	0.216	0.198*
		104.1	0.284*	0.36*	0.078*	0.058*	-0.078	0.136	0.318	0.216	0.198*
		104.2	0.284*	0.36*	-0.022*	-0.042*	0.022	0.136	0.318	0.216	0.198*
		104.3	0.184*	0.26*	0.078*	-0.042*	0.122	0.236	0.318	0.216	0.198*
		104.4	0.184*	0.36*	0.078*	-0.042*	0.122	0.236	0.318	0.216	0.198*
		104.5	0.184*	0.36*	0.078*	-0.042*	0.122	0.236	0.418	0.316	0.298*
		104.6	0.084*	0.36*	0.078*	-0.042*	0.122	0.236	0.418	0.316	0.198*
		104.7	0.084*	0.36*	0.078*	-0.042*	0.122	0.236	0.418	0.316	0.198*
		104.8	0.084*	0.36*	-0.022*	-0.042*	0.122	0.236	0.418	0.416	0.198*
		104.9	0.084*	0.36*	-0.022*	-0.042*	0.022	0.136	0.418	0.316	0.198*
		105	0.084*	0.36*	-0.022*	-0.042*	0.022	0.136	0.418	0.316	0.198*
		105.1	0.084*	0.36*	0.078*	0.058*	0.022	0.136	0.418	0.316	0.198*
		105.2	0.084*	0.36*	0.078*	0.058*	0.022	0.036	0.418	0.316	0.098*
		105.3	0.084*	0.36*	0.078*	0.058*	0.022	0.136	0.418	0.316	0.098*
		105.4	0.084*	0.36*	-0.022*	-0.142*	0.022	0.136	0.418	0.316	0.098*
		105.5	0.084*	0.36*	-0.022*	-0.042*	0.022	0.136	0.418	0.316	0.098*
		105.6	0.084*	0.36*	-0.022*	-0.042*	0.022	0.136	0.418	0.316	0.098*
		105.7	0.184*	0.46*	-0.022*	-0.042*	0.022	0.136	0.418	0.316	0.098*
		105.8	0.184*	0.46*	-0.022*	-0.042*	0.022	0.136	0.418	0.316	0.098*
		105.9	0.184*	0.36*	0.078*	-0.042*	0.022	0.136	0.318	0.216	0.198*
		106	0.084*	0.26*	0.078*	-0.042*	0.022	0.136	0.318	0.216	0.198*
		106.1	0.084*	0.26*	0.078*	-0.042*	0.022	0.136	0.318	0.216	0.298*
		106.2	0.084*	0.26*	0.078*	-0.042*	0.022	0.136	0.318	0.216	0.298*
		106.3	-0.016*	0.26*	0.078*	-0.042*	0.022	0.136	0.518	0.316	0.298*
		106.4	-0.016*	0.26*	0.078*	-0.042*	0.022	0.136	0.518	0.316	0.298*
		106.5	-0.016*	0.26*	0.078*	-0.042*	0.022	0.136	0.518	0.316	0.298*
		106.6	-0.016*	0.26*	0.078*	-0.042*	-0.178	-0.064	0.518	0.416	0.298*
		106.7	-0.016*	0.26*	0.078*	-0.042*	-0.178	0.036	0.518	0.416	0.298*
		106.8	-0.016*	0.36*	0.078*	0.058*	0.022	0.136	0.518	0.416	0.198*
		106.9	-0.016*	0.36*	0.078*	0.058*	0.022	0.136	0.518	0.416	0.198*
		107	-0.016*	0.36*	0.178*	0.158*	0.022	0.136	0.518	0.416	0.198*
		107.1	0.084*	0.46*	0.078*	0.058*	0.022	0.136	0.518	0.416	0.198*
		107.2	-0.016*	0.46*	0.078*	0.058*	0.022	0.136	0.418	0.416	0.098*
		107.3	-0.016*	0.36*	0.078*	0.058*	0.022	0.136	0.418	0.416	0.098*
		107.4	-0.016*	0.36*	0.078*	0.058*	0.022	0.136	0.418	0.416	0.098*
		107.5	-0.016*	0.36*	0.078*	0.058*	0.022	0.136	0.318	0.316	0.098*
		107.6	-0.116*	0.26*	0.078*	0.058*	0.022	0.136	0.318	0.316	0.098*
		107.7	-0.116*	0.26*	0.078*	0.058*	0.022	0.136	0.318	0.216	0.098*
		107.8	-0.116*	0.26*	0.178*	0.058*	-0.078	0.036	0.318	0.216	0.098*
		107.9	-0.116*	0.26*	0.178*	0.058*	-0.078	0.136	0.318	0.216	0.198*
		108	-0.116*	0.26*	0.178*	0.058*	-0.078	0.136	0.318	0.216	0.198*
		108.1	-0.116*	0.26*	0.078*	0.058*	-0.078	0.136	0.418	0.216	0.198*
		108.2	-0.116*	0.26*	0.078*	0.058*	-0.078	0.136	0.418	0.216	0.198*
		108.3	-0.016*	0.26*	0.078*	0.158*	-0.078	0.136	0.418	0.216	0.098*
		108.4	-0.016*	0.16*	0.078*	0.158*	0.022	0.136	0.518	0.416	0.198*
		108.5	-0.016*	0.16*	0.078*	0.158*	0.022	0.036	0.518	0.416	0.198*
		108.6	-0.016*	0.16*	0.078*	0.158*	-0.078	0.036	0.518	0.416	0.198*
		108.7	-0.016*	0.16*	-0.022*	0.058*	-0.078	0.036	0.518	0.416	0.198*
		108.8	-0.016*	0.16*	-0.022*	0.058*	-0.078	0.036	0.418	0.316	0.198*
		108.9	-0.016*	0.16*	-0.022*	-0.042*	-0.078	0.036	0.418	0.316	0.198*
		109	-0.016*	0.26*	-0.022*	-0.042*	-0.078	0.036	0.318	0.316	0.198*
		109.1	-0.116*	0.16*	-0.022*	-0.042*	-0.078	0.036	0.318	0.316	0.198*
		109.2	-0.016*	0.26*	0.078*	0.058*	-0.078	0.036	0.318	0.316	0.198*
		109.3	-0.016*	0.26*	0.078*	0.058*	-0.078	0.036	0.318	0.316	0.198*
		109.4	-0.016*	0.26*	0.078*	0.058*	0.022	0.136	0.318	0.316	0.098*
		109.5	-0.016*	0.26*	0.078*	0.058*	0.022	0.136	0.318	0.316	0.198*
		109.6	-0.016*	0.26*	0.078*	0.058*	0.022	0.136	0.318	0.316	0.198*
		109.7	-0.016*	0.26*	0.078*	0.158*	0.022	0.236	0.318	0.316	0.198*
		109.8	-0.016*	0.26*	0.178*	0.158*	0.122	0.236	0.318	0.316	0.198*
		109.9	-0.116*	0.26*	0.178*	0.158*	0.122	0.236	0.318	0.416	0.198*
		110	-0.116*	0.26*	0.178*	0.158*	0.122	0.136	0.418	0.316	0.098*
		110.1	-0.116*	0.26*	0.178*	0.158*	0.122	0.136	0.418	0.316	0.098*
		110.2	-0.116*	0.26*	0.178*	0.158*	0.122	0.136	0.418	0.316	0.098*
		110.3	-0.116*	0.16*	0.178*	0.158*	0.122	0.136	0.418	0.316	0.098*
		110.4	-0.116*	0.16*	0.078*	0.058*	0.022	0.036	0.418	0.316	0.098*
		110.5	-0.216*	0.06*	0.078*	0.058*	0.022	0.036	0.318	0.216	0.098*
		110.6	-0.116*	0.06*	0.178*	0.158*	-0.078	0.036	0.318	0.216	0.098*
		110.7	-0.116*	0.16*	0.178*	0.158*	-0.078	0.036	0.318	0.216	0.098*
		110.8	-0.116*	0.16*	0.078*	0.058*	-0.078	0.036	0.318	0.216	0.298*
		110.9	-0.116*	0.16*	0.078*	0.058*	-0.078	0.036	0.218	0.216	0.298*
		111	-0.116*	0.16*	0.078*	0.058*	-0.078	0.036	0.318	0.316	0.298*
		111.1	-0.116*	0.16*	0.078*	0.058*	0.022	0.136	0.318	0.316	0.298*
		111.2	-0.016*	0.26*	0.178*	0.058*	0.022	0.136	0.318	0.316	0.198*
		111.3	-0.016*	0.26*	0.178*	0.058*	0.022	0.136	0.318	0.316	0.198*
		111.4	-0.016*	0.26*	0.078*	-0.042*	0.022	0.136	0.418	0.316	0.198*
		111.5	-0.016*	0.26*	0.078*	-0.042*	0.122	0.236	0.418	0.316	0.198*
		111.6	-0.016*	0.26*	0.078*	0.058*	0.122	0.236	0.418	0.316	0.198*
		111.7	-0.016*	0.26*	0.078*	0.058*	0.122	0.236	0.418	0.216	0.198*
		111.8	-0.016*	0.26*	0.078*	0.058*	0.122	0.236	0.418	0.216	0.198*
		111.9	-0.116*	0.16*	0.078*	0.058*	0.122	0.236	0.418	0.216	0.098*
		112	-0.116*	0.16*	-0.022*	0.058*	0.122	0.236	0.418	0.216	0.098*
		112.1	-0.116*	0.16*	-0.022*	0.058*	0.022	0.136	0.418	0.316	0.098*
		112.2	-0.116*	0.16*	-0.022*	0.058*	0.022	0.136	0.418	0.316	0.098*
		112.3	-0.116*	0.16*	-0.022*	0.058*	0.022	0.136	0.318	0.216	0.098*
		112.4	-0.016*	0.16*	-0.022*	0.058*	0.022	0.136	0.318	0.216	0.098*
		112.5	-0.016*	0.16*	-0.022*	0.058*	-0.078	0.136	0.318	0.216	0.098*
		112.6	-0.016*	0.16*	-0.022*	0.058*	-0.078	0.136	0.418	0.216	0.098*
		112.7	0.084*	0.26*	0.078*	0.058*	-0.078	0.136	0.318	0.216	0.198*
		112.8	0.084*	0.26*	0.078*	0.058*	-0.078	0.136	0.318	0.216	0.198*
		112.9	0.084*	0.26*	0.178*	0.158*	-0.078	0.136	0.318	0.216	0.198*
		113	0.084*	0.26*	0.178*	0.258*	-0.078	0.136	0.318	0.216	0.198*
		113.1	0.084*	0.26*	0.178*	0.258*	0.122	0.136	0.318	0.216	0.198*
		113.2	0.084*	0.26*	0.078*	0.158*	0.122	0.136	0.318	0.216	0.198*
		113.3	0.084*	0.26*	0.078*	0.058*	0.122	0.136	0.318	0.216	0.198*
		113.4	0.084*	0.26*	0.078*	0.058*	0.122	0.136	0.318	0.216	0.098*
		113.5	-0.016*	0.16*	-0.022*	0.058*	0.122	0.136	0.318	0.216	0.098*
		113.6	0.084*	0.16*	-0.022*	0.058*	0.122	0.136	0.318	0.216	0.098*
		113.7	-0.016*	0.16*	-0.022*	0.058*	0.122	0.136	0.418	0.316	0.098*
		113.8	-0.016*	0.16*	-0.022*	0.058*	0.122	0.236	0.318	0.116	0.098*
		113.9	-0.016*	0.16*	-0.022*	0.058*	0.122	0.236	0.318	0.116	0.098*
		114	-0.016*	0.16*	-0.022*	0.058*	0.122	0.236	0.318	0.116	0.098*
		114.1	-0.016*	0.16*	0.078*	0.058*	0.122	0.236	0.418	0.116	0.098*
		114.2	-0.016*	0.16*	0.078*	0.058*	-0.078	0.136	0.418	0.116	0.098*
		114.3	0.084*	0.36*	0.078*	0.158*	-0.078	0.136	0.418	0.116	0.098*
		114.4	0.084*	0.36*	0.078*	0.158*	-0.078	0.136	0.418	0.216	0.098*
		114.5	0.084*	0.36*	0.078*	0.158*	-0.078	0.136	0.418	0.216	0.098*
		114.6	0.084*	0.36*	0.078*	0.158*	-0.078	0.136	0.418	0.216	0.098*
		114.7	0.084*	0.36*	-0.022*	0.058*	0.022	0.236	0.418	0.216	0.098*
		114.8	0.084*	0.36*	-0.122*	0.058*	0.022	0.236	0.418	0.216	0.098*
		114.9	0.084*	0.36*	-0.122*	0.058*	0.022	0.236	0.418	0.216	0.098*
		115	0.184*	0.36*	-0.122*	0.058*	0.022	0.236	0.418	0.216	0.098*
		115.1	0.184*	0.36*	-0.122*	-0.042*	0.022	0.236	0.318	0.116	0.198*
		115.2	0.084*	0.26*	-0.122*	-0.042*	0.022	0.236	0.318	0.116	0.198*
		115.3	0.084*	0.26*	-0.122*	-0.042*	0.122	0.236	0.318	0.116	0.098*
		115.4	0.084*	0.26*	-0.122*	-0.042*	0.122	0.236	0.318	0.116	0.098*
		115.5	0.084*	0.26*	0.078*	0.058*	0.122	0.136	0.318	0.116	0.098*
		115.6	0.084*	0.26*	0.078*	0.058*	0.122	0.136	0.418	0.116	0.098*
		115.7	0.084*	0.16*	0.078*	0.058*	0.122	0.236	0.418	0.116	0.098*
		115.8	0.084*	0.16*	0.078*	0.058*	0.122	0.236	0.318	0.016	0.098*
		115.9	-0.016*	0.26*	0.078*	0.158*	0.122	0.236	0.218	0.016	0.098*
		116	-0.016*	0.26*	0.078*	0.158*	0.122	0.236	0.218	0.016	0.098*
		116.1	-0.016*	0.26*	-0.022*	0.058*	0.022	0.136	0.218	0.016	0.098*
		116.2	-0.016*	0.26*	-0.022*	0.058*	0.022	0.136	0.318	0.116	0.198*
		116.3	-0.016*	0.26*	-0.022*	-0.042*	0.022	0.136	0.318	0.116	0.198*
		116.4	-0.016*	0.26*	-0.022*	-0.042*	0.022	0.136	0.318	0.116	0.198*
		116.5	-0.016*	0.26*	-0.022*	-0.042*	0.022	0.136	0.318	0.116	0.098*
		116.6	-0.016*	0.26*	-0.022*	-0.042*	0.022	0.136	0.318	0.116	0.098*
		116.7	-0.016*	0.26*	-0.022*	-0.042*	0.022	0.136	0.318	0.116	0.098*
		116.8	-0.016*	0.16*	-0.122*	-0.042*	0.022	0.136	0.318	0.216	-0.002*
		116.9	-0.016*	0.16*	-0.122*	-0.042*	0.022	0.236	0.318	0.116	-0.002*
		117	0.084*	0.26*	-0.122*	-0.042*	0.022	0.236	0.418	0.116	-0.002*
		117.1	0.084*	0.26*	-0.122*	-0.042*	0.022	0.236	0.418	0.116	-0.002*
		117.2	0.084*	0.26*	-0.122*	-0.042*	0.022	0.236	0.418	0.116	0.098*
		117.3	0.084*	0.26*	-0.122*	-0.042*	0.022	0.236	0.418	0.116	0.098*
		117.4	0.084*	0.26*	-0.022*	0.058*	-0.078	0.236	0.418	0.116	0.098*
		117.5	0.084*	0.26*	-0.022*	0.058*	-0.078	0.236	0.418	0.116	0.098*
		117.6	0.084*	0.26*	-0.022*	0.058*	-0.078	0.136	0.318	0.016	0.098*
		117.7	0.084*	0.26*	-0.022*	0.058*	-0.178	0.036	0.318	0.016	0.198*
		117.8	0.084*	0.26*	0.078*	0.158*	-0.178	0.036	0.318	0.016	0.198*
		117.9	0.084*	0.36*	-0.022*	0.058*	-0.178	0.036	0.318	0.016	0.198*
		118	0.084*	0.36*	-0.022*	-0.042*	-0.178	0.036	0.318	0.116	0.198*
		118.1	0.084*	0.36*	-0.022*	-0.042*	-0.078	0.136	0.318	0.116	0.198*
		118.2	0.084*	0.36*	-0.022*	-0.042*	0.022	0.136	0.318	0.116	0.098*
		118.3	0.084*	0.36*	-0.022*	-0.042*	0.022	0.136	0.218	0.116	0.098*
		118.4	0.084*	0.36*	-0.022*	-0.042*	0.022	0.136	0.218	0.116	0.098*
		118.5	-0.016*	0.36*	-0.022*	-0.042*	0.022	0.236	0.318	0.116	0.098*
		118.6	-0.016*	0.36*	-0.022*	0.058*	0.022	0.236	0.418	0.216	-0.002*
		118.7	-0.116*	0.26*	0.078*	0.058*	0.022	0.236	0.418	0.216	-0.002*
		118.8	-0.016*	0.36*	0.078*	0.058*	0.022	0.236	0.418	0.216	0.198*
		118.9	-0.016*	0.36*	0.078*	0.058*	0.022	0.236	0.418	0.216	0.198*
		119	-0.016*	0.36*	0.078*	0.058*	0.022	0.236	0.418	0.216	0.198*
		119.1	-0.016*	0.36*	0.078*	0.058*	0.022	0.236	0.418	0.216	0.198*
		119.2	-0.016*	0.36*	0.078*	0.058*	0.022	0.236	0.418	0.216	0.198*
		119.3	-0.016*	0.36*	0.078*	0.058*	0.022	0.236	0.418	0.216	0.198*
		119.4	-0.016*	0.36*	0.078*	0.058*	-0.078	0.036	0.318	0.316	0.198*
		119.5	-0.016*	0.46*	0.078*	0.058*	-0.078	0.036	0.318	0.116	0.098*
		119.6	-0.016*	0.46*	-0.022*	0.058*	-0.078	0.036	0.318	0.216	0.098*
		119.7	-0.016*	0.46*	-0.122*	-0.042*	-0.178	0.036	0.318	0.216	0.198*
		119.8	-0.016*	0.36*	-0.122*	-0.042*	-0.178	0.036	0.318	0.116	0.198*
		119.9	-0.016*	0.36*	-0.122*	-0.042*	-0.178	0.036	0.318	0.116	0.198*
		120	0.084*	0.36*	-0.122*	-0.042*	-0.078	0.036	0.318	0.116	0.198*
		120.1	0.084*	0.36*	-0.122*	-0.042*	-0.078	0.136	0.318	0.116	0.198*
		120.2	0.084*	0.36*	-0.022*	0.058*	-0.078	0.136	0.318	0.116	0.198*
		120.3	-0.016*	0.26*	0.078*	0.158*	-0.078	0.136	0.318	0.116	0.198*
		120.4	-0.016*	0.26*	0.078*	0.158*	-0.078	0.136	0.318	0.116	0.198*
		120.5	-0.016*	0.26*	0.078*	0.158*	0.022	0.236	0.318	0.116	0.198*
		120.6	-0.116*	0.26*	0.078*	0.158*	0.022	0.236	0.318	0.116	0.098*
		120.7	-0.116*	0.26*	0.078*	0.158*	0.022	0.236	0.318	0.116	0.098*
		120.8	-0.116*	0.26*	0.078*	0.158*	0.022	0.236	0.318	0.116	0.098*
		120.9	-0.116*	0.26*	0.078*	0.058*	0.022	0.136	0.318	0.116	0.198*
		121	-0.116*	0.26*	0.078*	0.058*	0.022	0.136	0.318	0.116	0.098*
		121.1	-0.116*	0.26*	0.078*	0.058*	-0.078	0.036	0.318	0.116	0.098*
		121.2	-0.116*	0.26*	0.078*	0.058*	-0.078	0.136	0.318	0.116	0.098*
		121.3	-0.116*	0.26*	0.078*	0.058*	-0.078	0.136	0.418	0.216	0.098*
		121.4	-0.016*	0.36*	0.078*	0.058*	-0.078	0.136	0.418	0.216	0.098*
		121.5	-0.016*	0.36*	0.078*	0.058*	-0.078	0.136	0.418	0.216	0.098*
		121.6	-0.016*	0.36*	-0.022*	-0.042*	0.022	0.136	0.518	0.216	0.098*
		121.7	-0.016*	0.36*	0.078*	0.058*	0.022	0.136	0.318	0.116	0.098*
		121.8	-0.016*	0.36*	0.078*	0.058*	0.022	0.136	0.318	0.116	0.098*
		121.9	-0.016*	0.36*	0.078*	0.058*	0.022	0.136	0.318	0.116	0.098*
		122	0.084*	0.36*	-0.022*	0.058*	-0.078	0.136	0.318	0.116	0.198*
		122.1	0.084*	0.36*	-0.022*	0.058*	-0.078	0.136	0.418	0.216	0.198*
		122.2	-0.016*	0.26*	0.078*	0.058*	-0.078	0.136	0.418	0.216	0.198*
		122.3	-0.016*	0.26*	0.078*	0.158*	-0.078	0.136	0.418	0.216	0.198*
		122.4	-0.016*	0.26*	0.078*	0.158*	0.022	0.236	0.418	0.216	0.198*
		122.5	-0.016*	0.26*	0.078*	0.158*	0.022	0.236	0.418	0.216	0.198*
		122.6	-0.016*	0.26*	0.078*	0.158*	0.022	0.236	0.418	0.216	0.298*
		122.7	-0.016*	0.26*	0.078*	0.158*	0.022	0.236	0.418	0.216	0.298*
		122.8	-0.016*	0.26*	0.078*	0.158*	0.022	0.236	0.418	0.216	0.198*
		122.9	-0.016*	0.26*	0.078*	0.158*	0.122	0.336	0.418	0.216	0.298*
		123	-0.016*	0.26*	0.078*	0.158*	0.122	0.336	0.318	0.116	0.298*
		123.1	-0.016*	0.26*	0.078*	0.158*	0.122	0.336	0.318	0.116	0.298*
		123.2	-0.116*	0.26*	0.078*	0.158*	0.122	0.336	0.318	0.116	0.298*
		123.3	-0.116*	0.26*	0.078*	0.158*	0.122	0.336	0.318	0.116	0.298*
		123.4	-0.116*	0.26*	0.078*	0.158*	0.122	0.336	0.318	0.116	0.298*
		123.5	-0.116*	0.26*	0.078*	0.158*	0.122	0.336	0.318	0.116	0.298*
		123.6	-0.116*	0.26*	0.078*	0.158*	0.122	0.336	0.318	0.116	0.298*
		123.7	-0.116*	0.26*	0.178*	0.058*	0.022	0.236	0.318	0.116	0.298*
		123.8	-0.116*	0.26*	0.178*	0.058*	0.022	0.236	0.318	0.116	0.298*
		123.9	-0.116*	0.26*	0.178*	0.058*	0.022	0.236	0.218	0.116	0.298*
		124	-0.216*	0.16*	0.178*	0.058*	0.022	0.236	0.218	0.116	0.198*
		124.1	-0.216*	0.16*	0.178*	0.058*	0.022	0.136	0.218	0.116	0.198*
		124.2	-0.116*	0.16*	0.078*	0.058*	0.022	0.236	0.218	0.216	0.198*
		124.3	-0.116*	0.06*	0.078*	0.058*	0.022	0.236	0.118	0.116	0.198*
		124.4	-0.116*	0.06*	0.078*	0.058*	0.022	0.236	0.118	0.116	0.098*
		124.5	-0.116*	0.06*	0.078*	0.058*	0.022	0.136	0.118	0.016	0.098*
		124.6	-0.116*	0.06*	0.078*	0.058*	0.022	0.136	0.118	0.016	0.098*
		124.7	-0.116*	0.06*	0.078*	0.058*	0.022	0.136	0.118	0.016	0.098*
		124.8	-0.116*	0.16*	-0.022*	-0.042*	0.022	0.136	0.118	0.016	0.098*
		124.9	-0.116*	0.16*	-0.022*	0.058*	0.022	0.136	0.118	0.016	0.098*
		125	-0.116*	0.16*	-0.022*	0.058*	0.022	0.136	0.118	0.016	0.098*
		125.1	-0.116*	0.16*	-0.022*	0.058*	0.022	0.136	0.118	0.016	0.098*
		125.2	-0.216*	0.06*	-0.022*	0.058*	0.122	0.236	0.118	0.016	0.098*
		125.3	-0.216*	-0.04*	-0.022*	0.058*	0.122	0.236	0.118	0.016	0.098*
		125.4	-0.216*	-0.04*	0.078*	0.058*	0.022	0.236	0.118	0.016	0.198*
		125.5	-0.316*	-0.04*	0.078*	0.058*	0.022	0.236	0.118	0.016	0.198*
		125.6	-0.316*	-0.04*	0.078*	0.058*	0.022	0.236	0.118	0.016	0.198*
		125.7	-0.316*	-0.04*	0.178*	0.158*	0.022	0.236	0.118	0.016	0.198*
		125.8	-0.316*	-0.04*	0.178*	0.158*	0.022	0.236	0.118	0.016	0.198*
		125.9	-0.216*	-0.04*	0.178*	0.158*	0.022	0.236	0.118	0.016	0.298*
		126	-0.216*	-0.04*	0.178*	0.158*	0.022	0.236	0.118	0.016	0.298*
		126.1	-0.216*	0.06*	0.178*	0.158*	0.022	0.236	0.218	0.016	0.198*
		126.2	-0.216*	0.06*	0.178*	0.258*	0.022	0.236	0.218	0.016	0.198*
		126.3	-0.116*	0.16*	0.178*	0.158*	0.022	0.236	0.218	0.016	0.198*
		126.4	-0.116*	0.16*	0.178*	0.158*	0.022	0.236	0.218	0.016	0.198*
		126.5	-0.116*	0.06*	0.178*	0.158*	0.022	0.236	0.218	0.016	0.198*
		126.6	-0.216*	-0.04*	0.178*	0.158*	0.022	0.236	0.218	0.016	0.098*
		126.7	-0.216*	-0.04*	0.178*	0.158*	0.022	0.236	0.218	0.016	0.098*
		126.8	-0.216*	-0.04*	0.178*	0.058*	-0.078	0.136	0.218	0.016	0.098*
		126.9	-0.216*	-0.04*	0.178*	0.058*	-0.078	0.136	0.218	0.116	0.098*
		127	-0.216*	-0.04*	0.178*	0.058*	0.022	0.236	0.118	0.016	0.098*
		127.1	-0.216*	-0.04*	0.178*	0.058*	0.022	0.236	0.218	0.116	0.098*
		127.2	-0.216*	-0.04*	0.178*	0.058*	0.022	0.236	0.218	0.116	0.098*
		127.3	-0.216*	0.06*	0.178*	0.058*	0.022	0.236	0.218	0.116	0.098*
		127.4	-0.216*	0.06*	0.278*	0.158*	0.022	0.236	0.218	0.116	0.198*
		127.5	-0.216*	0.06*	0.278*	0.158*	0.022	0.236	0.218	0.116	0.198*
		127.6	-0.116*	0.06*	0.178*	0.158*	0.022	0.236	0.118	0.116	0.098*
		127.7	-0.116*	0.06*	0.178*	0.158*	0.022	0.236	0.118	0.116	0.098*
		127.8	-0.116*	0.06*	0.178*	0.158*	0.022	0.236	0.118	0.116	0.098*
		127.9	-0.116*	0.06*	0.178*	0.158*	0.022	0.236	0.118	0.116	0.198*
		128	-0.116*	0.06*	0.178*	0.158*	0.022	0.236	0.118	0.116	0.198*
		128.1	-0.116*	0.06*	0.178*	0.158*	-0.078	0.236	0.218	0.116	0.198*
		128.2	-0.216*	-0.04*	0.178*	0.258*	-0.078	0.236	0.218	0.116	0.198*
		128.3	-0.216*	-0.04*	0.178*	0.258*	0.022	0.336	0.218	0.116	0.198*
		128.4	-0.216*	0.06*	0.078*	0.158*	0.022	0.336	0.218	0.016	0.098*
		128.5	-0.116*	0.16*	0.078*	0.158*	0.022	0.336	0.218	0.016	0.098*
		128.6	-0.116*	0.16*	0.178*	0.158*	0.022	0.336	0.318	0.116	0.098*
		128.7	-0.116*	0.16*	0.178*	0.158*	0.022	0.336	0.318	0.116	0.098*
		128.8	-0.116*	0.16*	0.178*	0.158*	0.022	0.336	0.318	0.116	0.098*
		128.9	-0.216*	0.06*	0.178*	0.158*	0.022	0.336	0.318	0.116	0.098*
		129	-0.116*	0.06*	0.178*	0.158*	0.022	0.336	0.318	0.116	0.098*
		129.1	-0.116*	0.06*	0.178*	0.158*	0.122	0.336	0.318	0.216	-0.002*
		129.2	-0.116*	0.06*	0.178*	0.158*	0.122	0.336	0.218	0.116	0.098*
		129.3	-0.116*	0.06*	0.178*	0.158*	0.122	0.336	0.218	0.116	0.198*
		129.4	-0.116*	0.06*	0.178*	0.158*	0.122	0.336	0.318	0.216	0.198*
		129.5	-0.116*	0.06*	0.178*	0.158*	0.122	0.336	0.418	0.216	0.198*
		129.6	-0.116*	0.16*	0.178*	0.158*	0.122	0.336	0.418	0.216	0.198*
		129.7	-0.116*	0.06*	0.178*	0.158*	0.122	0.336	0.418	0.216	0.198*
		129.8	-0.116*	0.06*	0.178*	0.158*	0.122	0.436	0.418	0.216	0.198*
		129.9	-0.116*	0.06*	0.178*	0.158*	0.122	0.436	0.418	0.216	0.198*
		130	-0.116*	0.06*	0.178*	0.158*	0.022	0.236	0.418	0.216	0.098*
		130.1	-0.116*	0.06*	0.178*	0.258*	0.022	0.236	0.418	0.216	0.098*
		130.2	-0.116*	0.06*	0.178*	0.258*	0.022	0.236	0.518	0.316	0.198*
		130.3	-0.016*	0.06*	0.178*	0.258*	0.022	0.236	0.518	0.316	0.198*
		130.4	-0.016*	0.06*	0.178*	0.258*	0.022	0.236	0.418	0.316	0.198*
		130.5	-0.016*	0.06*	0.178*	0.258*	0.022	0.236	0.418	0.316	0.198*
		130.6	-0.016*	0.06*	0.178*	0.158*	0.022	0.236	0.418	0.316	0.198*
		130.7	-0.016*	0.16*	0.178*	0.158*	0.022	0.336	0.518	0.316	0.198*
		130.8	-0.016*	0.16*	0.278*	0.158*	0.022	0.336	0.418	0.216	0.298*
		130.9	-0.016*	0.16*	0.178*	0.158*	0.122	0.336	0.418	0.216	0.298*
		131	-0.016*	0.16*	0.178*	0.158*	0.122	0.336	0.418	0.216	0.298*
		131.1	-0.016*	0.16*	0.178*	0.158*	0.122	0.336	0.418	0.316	0.298*
		131.2	-0.016*	0.16*	0.178*	0.158*	0.122	0.336	0.418	0.316	0.198*
		131.3	-0.116*	0.06*	0.078*	0.058*	0.122	0.336	0.418	0.216	0.198*
		131.4	-0.116*	0.16*	0.078*	0.058*	0.122	0.336	0.418	0.216	0.198*
		131.5	-0.116*	0.16*	0.078*	0.058*	0.122	0.436	0.418	0.216	0.198*
		131.6	-0.116*	0.26*	0.078*	0.158*	0.122	0.436	0.418	0.216	0.198*
		131.7	-0.116*	0.16*	0.178*	0.258*	0.022	0.336	0.518	0.316	0.198*
		131.8	-0.116*	0.16*	0.178*	0.258*	0.022	0.336	0.518	0.316	0.198*
		131.9	-0.116*	0.16*	0.178*	0.258*	0.022	0.336	0.518	0.316	0.198*
		132	-0.016*	0.16*	0.178*	0.258*	0.122	0.336	0.518	0.316	0.198*
		132.1	-0.016*	0.16*	0.178*	0.158*	0.122	0.336	0.518	0.316	0.198*
		132.2	-0.016*	0.16*	0.178*	0.158*	0.122	0.336	0.518	0.316	0.198*
		132.3	-0.016*	0.16*	0.178*	0.158*	0.122	0.336	0.518	0.316	0.198*
		132.4	-0.016*	0.16*	0.178*	0.158*	0.122	0.336	0.618	0.316	0.198*
		132.5	-0.016*	0.16*	0.178*	0.158*	0.122	0.336	0.518	0.316	0.198*
		132.6	-0.016*	0.16*	0.178*	0.158*	0.122	0.336	0.518	0.316	0.198*
		132.7	-0.016*	0.16*	0.178*	0.158*	0.122	0.336	0.518	0.316	0.198*
		132.8	-0.016*	0.16*	0.278*	0.158*	0.122	0.336	0.418	0.216	0.198*
		132.9	-0.116*	0.26*	0.278*	0.158*	0.122	0.336	0.418	0.216	0.098*
		133	-0.116*	0.26*	0.178*	0.058*	0.122	0.336	0.418	0.216	0.098*
		133.1	-0.116*	0.26*	0.178*	0.058*	0.122	0.336	0.418	0.316	0.198*
		133.2	-0.116*	0.26*	0.078*	0.058*	0.122	0.336	0.418	0.316	0.198*
		133.3	-0.216*	0.06*	0.078*	0.058*	0.122	0.336	0.418	0.316	0.298*
		133.4	-0.216*	0.06*	0.078*	0.058*	0.122	0.336	0.418	0.316	0.198*
		133.5	-0.216*	0.06*	0.078*	0.058*	0.122	0.336	0.418	0.316	0.198*
		133.6	-0.116*	0.06*	0.078*	-0.042*	0.122	0.336	0.418	0.316	0.198*
		133.7	-0.116*	0.06*	0.078*	-0.042*	0.122	0.336	0.418	0.316	0.198*
		133.8	-0.116*	0.06*	0.078*	-0.042*	0.122	0.436	0.418	0.316	0.198*
		133.9	-0.016*	0.16*	0.078*	-0.042*	0.122	0.436	0.418	0.316	0.198*
		134	-0.016*	0.16*	0.078*	0.058*	0.222	0.536	0.418	0.316	0.198*
		134.1	-0.016*	0.16*	0.078*	0.058*	0.222	0.536	0.318	0.216	0.198*
		134.2	-0.016*	0.16*	0.078*	0.058*	0.222	0.536	0.418	0.216	0.198*
		134.3	-0.016*	0.26*	0.078*	0.058*	0.222	0.536	0.418	0.216	0.198*
		134.4	-0.016*	0.26*	0.078*	0.058*	0.222	0.436	0.418	0.216	0.198*
		134.5	-0.116*	0.26*	0.078*	0.058*	0.222	0.436	0.418	0.216	0.198*
		134.6	-0.116*	0.26*	0.178*	0.158*	0.322	0.436	0.418	0.316	0.198*
		134.7	-0.116*	0.26*	0.178*	0.158*	0.322	0.436	0.418	0.316	-0.002*
		134.8	-0.116*	0.26*	0.178*	0.158*	0.322	0.436	0.418	0.316	-0.002*
		134.9	-0.116*	0.26*	0.178*	0.158*	0.322	0.436	0.418	0.316	-0.002*
		135	-0.116*	0.26*	0.178*	0.158*	0.322	0.436	0.418	0.316	-0.002*
		135.1	-0.116*	0.26*	0.178*	0.158*	0.222	0.336	0.418	0.316	-0.002*
		135.2	-0.116*	0.26*	0.178*	0.158*	0.222	0.336	0.418	0.216	-0.002*
		135.3	-0.216*	0.16*	0.178*	0.058*	0.122	0.336	0.418	0.216	-0.002*
		135.4	-0.216*	0.16*	0.178*	0.058*	0.122	0.336	0.418	0.216	-0.002*
		135.5	-0.216*	0.16*	0.178*	0.058*	0.122	0.336	0.418	0.216	0.098*
		135.6	-0.216*	0.16*	0.278*	0.058*	0.222	0.336	0.418	0.216	0.198*
		135.7	-0.216*	0.16*	0.278*	0.058*	0.222	0.336	0.418	0.216	0.198*
		135.8	-0.216*	0.16*	0.278*	0.058*	0.222	0.336	0.418	0.216	0.198*
		135.9	-0.116*	0.16*	0.278*	0.058*	0.222	0.336	0.518	0.216	0.198*
		136	-0.116*	0.16*	0.278*	0.058*	0.222	0.336	0.418	0.116	0.198*
		136.1	-0.116*	0.16*	0.178*	0.058*	0.222	0.336	0.418	0.216	0.198*
		136.2	-0.116*	0.06*	0.178*	0.058*	0.222	0.336	0.418	0.216	0.198*
		136.3	-0.216*	0.06*	0.178*	0.058*	0.222	0.336	0.418	0.216	0.198*
		136.4	-0.216*	0.06*	0.178*	0.058*	0.222	0.336	0.418	0.216	0.098*
		136.5	-0.216*	0.16*	0.178*	0.058*	0.222	0.336	0.418	0.216	0.098*
		136.6	-0.216*	0.16*	0.178*	0.058*	0.122	0.336	0.418	0.216	0.098*
		136.7	-0.116*	0.26*	0.178*	0.058*	0.122	0.336	0.418	0.216	0.098*
		136.8	-0.116*	0.26*	0.078*	-0.042*	0.122	0.236	0.518	0.316	0.098*
		136.9	-0.116*	0.26*	0.078*	-0.042*	0.222	0.336	0.518	0.316	0.098*
		137	-0.116*	0.26*	0.078*	0.058*	0.222	0.336	0.418	0.316	0.098*
		137.1	-0.116*	0.26*	0.078*	0.058*	0.222	0.336	0.418	0.316	0.098*
		137.2	-0.116*	0.26*	0.178*	0.158*	0.222	0.336	0.418	0.316	0.098*
		137.3	-0.116*	0.26*	0.178*	0.158*	0.222	0.336	0.318	0.116	0.098*
		137.4	-0.116*	0.26*	0.178*	0.158*	0.022	0.236	0.318	0.116	0.098*
		137.5	-0.116*	0.26*	0.178*	0.058*	0.022	0.336	0.318	0.116	0.098*
		137.6	-0.116*	0.26*	0.178*	0.058*	0.022	0.336	0.318	0.116	0.198*
		137.7	-0.116*	0.26*	0.178*	0.058*	0.022	0.336	0.318	0.116	0.098*
		137.8	-0.116*	0.26*	0.278*	0.058*	0.022	0.336	0.318	0.116	0.098*
		137.9	-0.016*	0.26*	0.278*	0.058*	0.122	0.236	0.318	0.116	0.098*
		138	-0.016*	0.26*	0.278*	0.058*	0.122	0.236	0.318	0.116	0.098*
		138.1	-0.116*	0.16*	0.278*	0.058*	0.122	0.236	0.318	0.116	0.098*
		138.2	-0.116*	0.16*	0.278*	0.058*	0.122	0.236	0.318	0.116	0.098*
		138.3	-0.116*	0.16*	0.278*	0.058*	0.122	0.236	0.418	0.116	-0.002*
		138.4	-0.116*	0.16*	0.278*	0.058*	0.122	0.236	0.418	0.116	-0.002*
		138.5	-0.116*	0.16*	0.278*	0.058*	0.122	0.236	0.518	0.216	-0.002*
		138.6	-0.116*	0.16*	0.278*	0.058*	0.022	0.236	0.518	0.216	-0.002*
		138.7	-0.116*	0.16*	0.278*	-0.042*	0.022	0.236	0.518	0.216	-0.002*
		138.8	-0.216*	0.16*	0.278*	-0.042*	0.022	0.236	0.518	0.216	-0.002*
		138.9	-0.216*	0.16*	0.378*	0.058*	-0.078	0.136	0.518	0.316	-0.002*
		139	-0.216*	0.16*	0.378*	0.158*	-0.078	0.236	0.518	0.316	-0.002*
		139.1	-0.216*	0.16*	0.278*	0.058*	-0.078	0.236	0.518	0.316	-0.002*
		139.2	-0.216*	0.16*	0.278*	0.058*	-0.078	0.236	0.418	0.116	-0.002*
		139.3	-0.116*	0.16*	0.278*	0.058*	-0.078	0.236	0.418	0.116	-0.002*
		139.4	-0.116*	0.16*	0.278*	0.058*	-0.078	0.236	0.418	0.116	-0.002*
		139.5	-0.116*	0.16*	0.278*	0.058*	-0.078	0.236	0.418	0.116	-0.002*
		139.6	-0.016*	0.26*	0.278*	0.058*	-0.078	0.236	0.418	0.116	-0.002*
		139.7	-0.016*	0.26*	0.378*	0.058*	0.022	0.236	0.318	0.116	-0.002*
		139.8	-0.016*	0.26*	0.378*	0.058*	0.022	0.236	0.318	0.116	-0.002*
		139.9	-0.016*	0.26*	0.278*	0.058*	0.022	0.136	0.318	0.116	-0.002*
		140	-0.116*	0.16*	0.278*	0.058*	-0.078	0.036	0.318	0.216	0.098*
		140.1	-0.116*	0.16*	0.278*	0.058*	0.022	0.136	0.318	0.216	0.098*
		140.2	-0.116*	0.16*	0.278*	0.158*	0.022	0.136	0.318	0.216	0.098*
		140.3	-0.116*	0.16*	0.278*	0.158*	0.022	0.136	0.318	0.216	0.098*
		140.4	-0.116*	0.16*	0.278*	0.158*	0.022	0.136	0.318	0.216	0.198*
		140.5	-0.116*	0.16*	0.278*	0.158*	0.022	0.236	0.318	0.216	0.198*
		140.6	-0.116*	0.16*	0.278*	0.058*	0.022	0.236	0.418	0.316	0.198*
		140.7	-0.216*	0.16*	0.378*	0.158*	0.022	0.236	0.418	0.316	0.098*
		140.8	-0.216*	0.06*	0.378*	0.158*	0.022	0.236	0.518	0.316	-0.002*
		140.9	-0.216*	0.06*	0.378*	0.158*	0.022	0.236	0.518	0.316	-0.002*
		141	-0.216*	0.16*	0.278*	0.058*	0.022	0.236	0.518	0.216	-0.002*
		141.1	-0.116*	0.16*	0.278*	0.058*	-0.078	0.236	0.518	0.216	-0.002*
		141.2	-0.116*	0.16*	0.278*	0.058*	-0.078	0.136	0.518	0.216	-0.002*
		141.3	-0.116*	0.16*	0.278*	0.058*	-0.178	0.036	0.418	0.116	-0.002*
		141.4	-0.116*	0.16*	0.278*	0.058*	-0.078	0.036	0.418	0.216	-0.002*
		141.5	-0.116*	0.16*	0.178*	0.158*	-0.078	0.036	0.418	0.216	-0.002*
		141.6	-0.116*	0.16*	0.178*	0.158*	-0.078	0.136	0.418	0.216	-0.002*
		141.7	-0.116*	0.16*	0.278*	0.158*	-0.078	0.136	0.418	0.216	-0.002*
		141.8	-0.116*	0.16*	0.278*	0.158*	-0.078	0.136	0.418	0.216	-0.002*
		141.9	-0.116*	0.16*	0.278*	0.158*	-0.078	0.136	0.418	0.216	-0.002*
		142	-0.116*	0.16*	0.278*	0.158*	-0.078	0.136	0.418	0.216	-0.002*
		142.1	-0.116*	0.16*	0.278*	0.158*	-0.078	0.136	0.418	0.216	-0.002*
		142.2	-0.116*	0.16*	0.278*	0.158*	0.022	0.236	0.418	0.216	-0.002*
		142.3	-0.116*	0.16*	0.278*	0.158*	0.022	0.236	0.418	0.216	-0.002*
		142.4	-0.016*	0.16*	0.178*	-0.042*	0.022	0.236	0.418	0.216	-0.002*
		142.5	-0.016*	0.16*	0.178*	-0.042*	0.022	0.236	0.318	0.216	-0.002*
		142.6	-0.016*	0.16*	0.178*	-0.042*	0.022	0.236	0.318	0.216	-0.002*
		142.7	-0.016*	0.16*	0.178*	-0.042*	0.022	0.236	0.218	0.016	0.098*
		142.8	-0.016*	0.16*	0.278*	-0.042*	0.022	0.236	0.318	0.116	0.098*
		142.9	-0.116*	0.06*	0.278*	-0.042*	0.122	0.336	0.318	0.216	0.098*
		143	-0.116*	0.06*	0.278*	-0.042*	0.122	0.336	0.318	0.216	0.098*
		143.1	-0.116*	0.06*	0.278*	-0.042*	0.122	0.236	0.318	0.216	0.098*
		143.2	-0.116*	0.06*	0.178*	-0.042*	0.022	0.136	0.318	0.216	-0.002*
		143.3	-0.116*	-0.04*	0.178*	-0.042*	0.022	0.136	0.318	0.216	-0.102*
		143.4	-0.116*	-0.04*	0.278*	0.158*	0.022	0.136	0.318	0.216	-0.102*
		143.5	-0.116*	0.06*	0.278*	0.158*	0.022	0.136	0.318	0.216	-0.102*
		143.6	-0.116*	0.06*	0.278*	0.158*	0.022	0.136	0.318	0.216	-0.002*
		143.7	-0.116*	0.16*	0.278*	0.158*	0.122	0.236	0.318	0.216	-0.002*
		143.8	-0.116*	0.16*	0.278*	0.158*	0.122	0.236	0.318	0.216	-0.002*
		143.9	-0.016*	0.16*	0.278*	0.158*	0.122	0.236	0.318	0.216	-0.002*
		144	-0.016*	0.16*	0.278*	0.158*	0.122	0.236	0.318	0.216	0.098*
		144.1	-0.116*	0.06*	0.278*	0.158*	0.122	0.236	0.418	0.216	0.098*
		144.2	-0.116*	0.06*	0.178*	0.058*	0.022	0.236	0.418	0.216	0.098*
		144.3	-0.116*	0.06*	0.178*	0.058*	0.022	0.236	0.418	0.216	0.098*
		144.4	-0.116*	0.06*	0.178*	0.058*	0.022	0.236	0.418	0.216	0.098*
		144.5	-0.116*	0.06*	0.178*	0.058*	0.022	0.236	0.418	0.216	0.098*
		144.6	-0.116*	0.06*	0.178*	0.058*	-0.078	0.136	0.418	0.216	0.098*
		144.7	-0.116*	0.06*	0.178*	0.058*	0.022	0.136	0.418	0.216	0.098*
		144.8	-0.116*	-0.04*	0.178*	0.058*	0.022	0.136	0.418	0.216	0.198*
		144.9	-0.116*	0.06*	0.178*	0.058*	0.022	0.136	0.418	0.216	0.098*
		145	-0.116*	0.06*	0.178*	-0.042*	0.022	0.236	0.418	0.216	-0.002*
		145.1	-0.116*	0.06*	0.178*	-0.042*	0.022	0.136	0.418	0.316	-0.002*
		145.2	-0.116*	0.06*	0.178*	-0.042*	0.022	0.136	0.318	0.316	-0.002*
		145.3	-0.116*	0.06*	0.178*	-0.042*	0.022	0.136	0.318	0.216	-0.002*
		145.4	-0.116*	0.06*	0.178*	-0.042*	0.022	0.136	0.318	0.216	-0.002*
		145.5	-0.016*	0.16*	0.178*	-0.042*	0.122	0.236	0.318	0.216	-0.002*
		145.6	-0.016*	0.16*	0.178*	-0.042*	0.122	0.236	0.318	0.216	-0.002*
		145.7	-0.016*	0.16*	0.178*	-0.042*	0.122	0.236	0.318	0.216	-0.002*
		145.8	-0.016*	0.16*	0.178*	0.058*	0.122	0.236	0.218	0.116	0.098*
		145.9	-0.016*	0.16*	0.178*	0.058*	0.122	0.236	0.318	0.116	0.098*
		146	-0.016*	0.16*	0.278*	0.058*	0.122	0.236	0.318	0.116	0.098*
		146.1	-0.016*	0.06*	0.178*	0.058*	0.022	0.136	0.318	0.116	0.098*
		146.2	-0.016*	0.06*	0.178*	0.058*	0.022	0.136	0.318	0.116	0.198*
		146.3	-0.116*	0.06*	0.178*	0.058*	0.022	0.136	0.318	0.116	0.198*
		146.4	-0.116*	0.06*	0.178*	0.058*	0.022	0.136	0.318	0.116	0.198*
		146.5	-0.116*	0.06*	0.078*	-0.042*	0.022	0.136	0.318	0.116	0.198*
		146.6	-0.116*	0.06*	0.078*	-0.042*	0.022	0.136	0.218	0.116	-0.002*
		146.7	-0.116*	0.06*	0.078*	-0.042*	0.022	0.136	0.318	0.216	-0.002*
		146.8	-0.116*	0.06*	0.078*	-0.042*	0.022	0.036	0.318	0.216	-0.002*
		146.9	-0.116*	0.06*	0.078*	-0.042*	0.022	0.136	0.318	0.216	-0.002*
		147	-0.116*	0.06*	0.078*	-0.042*	0.022	0.136	0.318	0.216	-0.002*
		147.1	-0.116*	0.06*	0.078*	-0.042*	0.022	0.136	0.318	0.216	-0.002*
		147.2	-0.116*	0.06*	0.078*	-0.042*	0.122	0.136	0.418	0.216	-0.002*
		147.3	-0.116*	0.06*	0.078*	-0.142*	0.122	0.136	0.418	0.216	-0.002*
		147.4	-0.116*	0.06*	0.078*	-0.042*	0.122	0.136	0.418	0.316	-0.002*
		147.5	-0.116*	0.06*	0.078*	-0.042*	0.222	0.236	0.418	0.316	-0.002*
		147.6	-0.116*	0.06*	0.178*	-0.042*	0.222	0.236	0.418	0.316	0.098*
		147.7	-0.216*	0.06*	0.178*	-0.042*	0.222	0.236	0.418	0.316	0.098*
		147.8	-0.216*	0.06*	0.178*	-0.042*	0.122	0.136	0.418	0.316	0.098*
		147.9	-0.116*	0.16*	0.178*	-0.042*	0.122	0.136	0.318	0.316	0.098*
		148	-0.116*	0.16*	0.178*	-0.042*	0.122	0.136	0.318	0.316	0.098*
		148.1	-0.216*	0.06*	0.178*	-0.042*	0.122	0.136	0.318	0.216	0.098*
		148.2	-0.216*	0.06*	0.178*	-0.042*	0.122	0.136	0.318	0.216	0.098*
		148.3	-0.216*	0.16*	0.178*	-0.042*	0.122	0.036	0.318	0.216	0.098*
		148.4	-0.116*	0.16*	0.178*	-0.042*	0.122	0.036	0.318	0.216	0.098*
		148.5	-0.116*	0.16*	0.178*	-0.042*	0.022	0.036	0.218	0.116	-0.002*
		148.6	-0.116*	0.16*	0.178*	-0.042*	0.022	0.036	0.318	0.116	-0.002*
		148.7	-0.116*	0.16*	0.078*	-0.142*	0.022	0.036	0.318	0.116	-0.002*
		148.8	-0.116*	0.16*	0.078*	-0.042*	0.022	0.136	0.318	0.116	-0.002*
		148.9	-0.116*	0.16*	0.078*	-0.042*	0.022	0.136	0.318	0.116	-0.002*
		149	-0.116*	0.16*	0.178*	0.058*	0.222	0.136	0.318	0.116	-0.002*
		149.1	-0.116*	0.06*	0.178*	0.058*	0.122	0.136	0.318	0.216	-0.002*
		149.2	-0.116*	0.06*	0.178*	0.058*	0.122	0.136	0.318	0.216	0.198*
		149.3	-0.116*	0.06*	0.178*	0.058*	0.122	0.136	0.318	0.216	0.198*
		149.4	-0.116*	0.06*	0.178*	0.058*	0.122	0.136	0.418	0.316	0.198*
		149.5	-0.116*	0.06*	0.178*	0.058*	0.122	0.136	0.418	0.316	0.198*
		149.6	-0.116*	0.06*	0.178*	0.058*	0.122	0.136	0.418	0.316	0.198*
		149.7	-0.116*	0.06*	0.178*	0.058*	0.122	0.036	0.418	0.316	0.198*
		149.8	-0.116*	0.16*	0.278*	0.058*	0.122	0.036	0.418	0.316	0.198*
[truncated: 5,501 more rows]

## Sheet: Figure_S5_B
		Time	3.9063	7.8125	15.6	31.3	62.5	125	250	500 nM	3.91
		-50	0.246*	0.144*	-0.058	-0.116	-0.026	0.014	0.26	-0.04	-0.012*
		-49.9	0.246*	0.044*	-0.058	-0.116	0.074	0.014	0.26	-0.04	-0.112*
		-49.8	0.246*	0.044*	0.042	-0.016	0.074	0.014	0.16	-0.04	-0.112*
		-49.7	0.246*	0.044*	0.042	-0.016	0.074	0.014	0.26	-0.04	-0.112*
		-49.6	0.246*	0.044*	-0.058	-0.116	0.074	-0.086	0.16	-0.04	-0.112*
		-49.5	0.246*	0.144*	-0.058	-0.116	-0.026	-0.086	0.26	0.06	-0.112*
		-49.4	0.346*	0.144*	0.042	-0.116	0.074	-0.086	0.16	-0.04	-0.212*
		-49.3	0.346*	0.044*	0.042	-0.016	0.074	-0.086	0.26	0.06	-0.212*
		-49.2	0.346*	0.044*	0.042	-0.016	0.174	0.014	0.26	0.06	-0.212*
		-49.1	0.246*	-0.056*	0.142	-0.016	0.074	-0.086	0.26	0.06	-0.112*
		-49	0.346*	0.144*	0.142	-0.016	-0.026	0.014	0.16	-0.04	-0.112*
		-48.9	0.346*	0.144*	0.042	-0.116	0.074	0.014	0.26	0.06	-0.112*
		-48.8	0.446*	0.144*	-0.058	-0.116	0.074	0.014	0.26	0.06	-0.112*
		-48.7	0.346*	0.044*	0.042	-0.116	0.074	-0.086	0.36	0.06	-0.112*
		-48.6	0.346*	0.144*	0.042	-0.016	-0.026	-0.186	0.26	0.06	-0.212*
		-48.5	0.346*	0.144*	0.042	-0.016	-0.026	-0.186	0.16	-0.04	-0.212*
		-48.4	0.246*	0.144*	0.042	-0.116	-0.026	-0.086	0.16	-0.04	-0.212*
		-48.3	0.346*	0.144*	0.042	-0.116	0.174	0.014	0.36	0.06	-0.212*
		-48.2	0.346*	0.044*	0.142	-0.116	0.074	-0.086	0.36	0.16	-0.212*
		-48.1	0.346*	0.144*	0.142	-0.016	-0.026	-0.086	0.36	0.16	-0.212*
		-48	0.346*	0.144*	0.042	-0.116	-0.026	-0.086	0.26	0.06	-0.112*
		-47.9	0.346*	0.144*	0.042	-0.116	0.074	0.014	0.26	0.06	-0.212*
		-47.8	0.346*	0.044*	-0.058	-0.216	0.074	-0.086	0.36	0.06	-0.212*
		-47.7	0.346*	0.144*	-0.058	-0.116	-0.026	-0.186	0.26	0.06	-0.312*
		-47.6	0.346*	0.144*	0.042	-0.116	-0.026	-0.186	0.36	0.16	-0.212*
		-47.5	0.446*	0.244*	0.042	-0.116	0.074	-0.186	0.26	0.06	-0.212*
		-47.4	0.446*	0.244*	0.042	-0.116	0.074	0.014	0.26	0.06	-0.212*
		-47.3	0.346*	0.244*	0.042	-0.016	0.074	0.014	0.36	0.06	-0.112*
		-47.2	0.346*	0.244*	0.142	-0.016	-0.026	-0.086	0.36	0.16	-0.112*
		-47.1	0.346*	0.244*	0.042	-0.216	0.074	0.014	0.36	0.16	-0.212*
		-47	0.346*	0.244*	0.042	-0.216	0.074	0.014	0.26	0.06	-0.212*
		-46.9	0.246*	0.244*	0.042	-0.116	0.074	0.014	0.26	0.06	-0.212*
		-46.8	0.246*	0.244*	0.042	-0.116	0.074	0.014	0.26	0.06	-0.212*
		-46.7	0.346*	0.144*	0.042	-0.216	-0.026	-0.186	0.26	0.06	-0.212*
		-46.6	0.246*	0.044*	0.042	-0.216	0.174	0.014	0.16	-0.04	-0.212*
		-46.5	0.246*	0.044*	-0.058	-0.216	0.074	0.014	0.26	-0.04	-0.212*
		-46.4	0.246*	0.144*	0.042	-0.016	0.074	0.014	0.36	0.06	-0.112*
		-46.3	0.346*	0.244*	0.042	-0.116	0.074	0.014	0.36	0.06	-0.112*
		-46.2	0.346*	0.244*	0.042	-0.116	-0.026	0.014	0.46	0.16	-0.112*
		-46.1	0.246*	0.144*	0.042	-0.116	0.074	0.014	0.46	0.16	-0.112*
		-46	0.246*	0.144*	0.042	-0.116	0.074	-0.086	0.26	0.06	-0.112*
		-45.9	0.246*	0.244*	0.042	-0.116	0.074	-0.086	0.26	0.06	-0.212*
		-45.8	0.146*	0.144*	0.142	-0.116	-0.026	-0.086	0.26	-0.04	-0.212*
		-45.7	0.246*	0.144*	0.142	-0.016	0.174	0.014	0.36	-0.04	-0.012*
		-45.6	0.246*	0.144*	0.142	-0.016	0.174	0.014	0.36	-0.04	-0.112*
		-45.5	0.346*	0.244*	0.042	-0.116	0.174	0.114	0.26	0.06	-0.112*
		-45.4	0.246*	0.144*	0.042	-0.016	0.174	0.114	0.26	0.06	-0.112*
		-45.3	0.146*	0.144*	0.042	-0.016	0.174	0.114	0.36	0.06	-0.112*
		-45.2	0.146*	0.144*	0.042	-0.016	0.074	0.114	0.36	0.06	-0.012*
		-45.1	0.146*	0.044*	0.042	-0.116	-0.026	0.114	0.26	-0.04	-0.112*
		-45	0.246*	0.144*	0.242	-0.016	0.074	0.114	0.36	-0.04	-0.212*
		-44.9	0.246*	0.144*	0.142	-0.016	0.174	0.114	0.36	-0.04	-0.212*
		-44.8	0.446*	0.244*	0.042	-0.116	0.174	0.114	0.16	-0.14	-0.212*
		-44.7	0.346*	0.244*	0.042	-0.116	0.074	0.114	0.26	-0.04	-0.212*
		-44.6	0.346*	0.144*	0.042	-0.216	-0.026	0.114	0.36	-0.04	-0.312*
		-44.5	0.346*	0.044*	0.042	-0.216	0.074	0.114	0.26	-0.04	-0.212*
		-44.4	0.446*	0.144*	0.142	-0.016	0.074	0.214	0.26	-0.04	-0.212*
		-44.3	0.346*	0.144*	0.142	-0.116	-0.026	0.114	0.36	-0.04	-0.112*
		-44.2	0.246*	0.144*	0.142	-0.016	0.174	0.114	0.16	-0.14	-0.212*
		-44.1	0.046*	0.044*	-0.058	-0.216	0.174	0.214	0.36	-0.04	-0.312*
		-44	0.046*	0.044*	-0.058	-0.116	-0.026	0.114	0.36	0.06	-0.212*
		-43.9	0.046*	-0.056*	0.042	-0.016	0.074	0.114	0.26	-0.04	-0.112*
		-43.8	0.146*	0.144*	0.042	-0.016	-0.026	0.114	0.06	-0.14	-0.112*
		-43.7	0.146*	0.044*	0.042	-0.016	0.074	0.014	0.06	-0.04	-0.112*
		-43.6	0.246*	0.144*	-0.058	0.084	0.074	0.114	0.26	0.06	-0.212*
		-43.5	0.146*	0.144*	0.042	-0.016	0.174	0.114	0.16	0.06	-0.212*
		-43.4	0.146*	0.144*	0.042	-0.016	-0.026	0.114	0.26	0.16	-0.212*
		-43.3	0.246*	0.044*	0.042	-0.016	0.074	0.114	0.26	0.16	-0.212*
		-43.2	0.246*	0.144*	0.042	0.084	-0.026	0.114	0.16	0.06	-0.212*
		-43.1	0.246*	0.144*	0.042	0.084	-0.126	0.014	0.26	0.06	-0.312*
		-43	0.246*	0.044*	0.142	0.184	-0.026	0.014	0.26	0.06	-0.212*
		-42.9	0.246*	0.044*	0.142	0.184	0.074	0.114	0.26	0.16	-0.212*
		-42.8	0.246*	0.044*	0.042	0.084	-0.026	0.114	0.36	0.16	-0.212*
		-42.7	0.346*	0.044*	0.042	0.084	-0.026	0.114	0.26	0.06	-0.312*
		-42.6	0.346*	0.044*	0.042	0.084	-0.026	0.014	0.26	0.06	-0.312*
		-42.5	0.246*	0.044*	0.142	0.184	-0.026	0.014	0.26	0.16	-0.312*
		-42.4	0.246*	0.044*	0.142	0.084	-0.026	0.114	0.16	0.06	-0.312*
		-42.3	0.346*	0.044*	0.142	0.084	-0.026	0.114	0.16	0.06	-0.212*
		-42.2	0.346*	0.144*	0.142	0.084	-0.026	0.114	0.26	0.16	-0.312*
		-42.1	0.346*	0.144*	0.042	0.084	-0.026	0.114	0.36	0.16	-0.312*
		-42	0.346*	0.144*	0.142	0.184	-0.026	0.214	0.36	0.16	-0.212*
		-41.9	0.346*	0.044*	0.142	0.184	-0.026	0.214	0.36	0.26	-0.312*
		-41.8	0.446*	0.144*	0.142	0.184	0.074	0.314	0.36	0.16	-0.312*
		-41.7	0.446*	0.244*	0.142	0.184	0.074	0.214	0.26	0.06	-0.212*
		-41.6	0.346*	0.144*	0.042	-0.016	0.074	0.114	0.26	0.06	-0.212*
		-41.5	0.446*	0.144*	0.042	0.084	0.074	0.114	0.36	0.16	-0.212*
		-41.4	0.346*	0.144*	0.142	0.084	-0.026	0.014	0.36	0.16	-0.212*
		-41.3	0.346*	0.144*	0.242	0.184	-0.026	0.014	0.26	0.16	-0.212*
		-41.2	0.346*	0.144*	0.142	0.084	0.174	0.214	0.26	0.16	-0.212*
		-41.1	0.346*	0.144*	0.142	0.084	0.074	0.214	0.26	0.16	-0.212*
		-41	0.246*	0.044*	0.042	0.084	0.074	0.214	0.16	0.06	-0.212*
		-40.9	0.446*	0.144*	0.042	0.084	-0.026	0.114	0.16	0.06	-0.312*
		-40.8	0.446*	0.144*	0.142	0.084	-0.026	0.014	0.36	0.16	-0.312*
		-40.7	0.446*	0.144*	0.042	-0.016	-0.026	0.014	0.36	0.16	-0.312*
		-40.6	0.446*	0.144*	0.042	0.084	0.074	0.114	0.36	0.26	-0.312*
		-40.5	0.346*	0.044*	0.042	-0.016	-0.026	0.114	0.36	0.16	-0.212*
		-40.4	0.346*	0.144*	0.042	-0.016	0.074	0.114	0.26	0.06	-0.212*
		-40.3	0.346*	0.044*	0.142	0.084	0.074	0.114	0.26	0.06	-0.312*
		-40.2	0.446*	0.044*	0.042	-0.016	0.074	0.114	0.26	0.06	-0.312*
		-40.1	0.346*	0.044*	0.142	-0.016	-0.026	0.014	0.26	0.06	-0.312*
		-40	0.346*	0.044*	0.142	-0.016	-0.126	0.014	0.46	0.16	-0.312*
		-39.9	0.346*	0.044*	0.142	0.084	-0.126	-0.086	0.36	0.16	-0.212*
		-39.8	0.346*	0.044*	0.142	0.084	-0.026	0.014	0.26	0.06	-0.212*
		-39.7	0.246*	0.044*	0.042	0.084	0.074	0.014	0.26	0.06	-0.212*
		-39.6	0.246*	0.044*	0.042	-0.016	0.074	0.114	0.26	0.16	-0.212*
		-39.5	0.346*	0.144*	-0.058	-0.116	0.074	0.114	0.26	0.06	-0.212*
		-39.4	0.346*	0.044*	-0.058	-0.116	0.074	0.114	0.26	0.06	-0.312*
		-39.3	0.246*	0.044*	-0.058	-0.116	-0.026	0.014	0.26	0.06	-0.212*
		-39.2	0.346*	0.044*	0.042	-0.016	-0.026	0.014	0.26	0.06	-0.212*
		-39.1	0.346*	0.044*	0.042	-0.016	0.074	0.014	0.36	0.16	-0.212*
		-39	0.346*	0.044*	0.042	-0.016	0.074	0.014	0.36	0.16	-0.212*
		-38.9	0.346*	0.044*	0.142	0.084	0.074	0.114	0.46	0.16	-0.212*
		-38.8	0.246*	0.044*	0.142	0.084	0.174	0.214	0.36	0.06	-0.212*
		-38.7	0.246*	0.044*	0.042	-0.016	0.174	0.214	0.36	0.06	-0.112*
		-38.6	0.246*	0.044*	0.042	0.084	0.174	0.214	0.36	0.16	-0.112*
		-38.5	0.246*	0.044*	0.042	-0.016	0.174	0.114	0.36	0.16	-0.112*
		-38.4	0.346*	0.044*	0.042	-0.016	0.174	0.114	0.36	0.16	-0.112*
		-38.3	0.346*	0.044*	0.042	-0.016	0.174	0.114	0.36	0.16	-0.212*
		-38.2	0.346*	0.144*	0.142	-0.016	0.174	0.214	0.36	0.26	-0.212*
		-38.1	0.346*	0.144*	0.142	-0.016	0.074	0.114	0.36	0.16	-0.212*
		-38	0.246*	0.044*	0.142	0.084	0.074	0.114	0.26	0.16	-0.112*
		-37.9	0.246*	0.044*	0.142	0.084	0.074	0.114	0.36	0.16	-0.112*
		-37.8	0.146*	0.044*	0.042	-0.016	0.074	0.114	0.36	0.16	-0.112*
		-37.7	0.246*	0.144*	0.142	0.084	0.074	0.114	0.36	0.26	-0.112*
		-37.6	0.246*	0.144*	0.142	0.084	0.174	0.114	0.36	0.26	-0.012*
		-37.5	0.246*	0.144*	0.142	0.084	0.174	0.114	0.36	0.26	-0.012*
		-37.4	0.246*	0.144*	0.142	0.084	0.274	0.114	0.36	0.26	-0.112*
		-37.3	0.246*	0.144*	0.142	0.084	0.174	0.214	0.36	0.26	-0.112*
		-37.2	0.246*	0.144*	0.142	0.084	0.174	0.214	0.36	0.26	-0.112*
		-37.1	0.146*	0.044*	0.142	0.084	0.174	0.214	0.46	0.16	-0.112*
		-37	0.146*	0.044*	0.142	0.084	0.074	0.114	0.46	0.16	-0.112*
		-36.9	0.146*	0.044*	0.142	0.084	0.074	0.114	0.46	0.16	-0.112*
		-36.8	0.246*	0.044*	0.242	0.084	0.074	0.114	0.46	0.16	-0.112*
		-36.7	0.146*	0.044*	0.242	0.084	0.174	0.114	0.46	0.26	-0.112*
		-36.6	0.146*	0.044*	0.242	0.084	0.174	0.114	0.46	0.26	-0.212*
		-36.5	0.146*	0.044*	0.242	0.084	0.174	0.214	0.36	0.16	-0.212*
		-36.4	0.146*	0.144*	0.242	0.084	0.174	0.114	0.36	0.16	-0.112*
		-36.3	0.146*	0.144*	0.142	0.084	0.074	0.114	0.36	0.16	-0.112*
		-36.2	0.146*	0.144*	0.142	0.084	-0.026	0.014	0.26	0.16	-0.212*
		-36.1	0.146*	0.144*	0.142	0.084	-0.026	0.014	0.26	0.16	-0.212*
		-36	0.146*	0.144*	0.142	0.084	0.074	0.014	0.26	0.26	-0.112*
		-35.9	0.246*	0.144*	0.142	0.084	0.074	0.014	0.26	0.26	-0.112*
		-35.8	0.246*	0.144*	0.042	0.084	0.074	0.114	0.26	0.26	-0.112*
		-35.7	0.246*	0.144*	0.142	0.184	0.074	0.114	0.26	0.26	-0.112*
		-35.6	0.146*	0.144*	0.142	0.184	0.174	0.214	0.26	0.16	-0.112*
		-35.5	0.146*	0.044*	0.142	0.184	0.074	0.114	0.36	0.16	-0.112*
		-35.4	0.146*	0.044*	0.242	0.084	0.074	0.114	0.26	0.06	-0.112*
		-35.3	0.146*	0.044*	0.242	0.084	0.074	0.114	0.26	0.06	-0.012*
		-35.2	0.146*	0.044*	0.242	0.184	0.074	0.114	0.26	0.06	-0.212*
		-35.1	0.146*	0.044*	0.242	0.184	0.074	0.114	0.26	0.06	-0.212*
		-35	0.146*	0.044*	0.242	0.184	0.074	0.114	0.26	0.06	-0.212*
		-34.9	0.246*	0.144*	0.242	0.184	0.074	0.214	0.26	0.06	-0.212*
		-34.8	0.246*	0.144*	0.242	0.184	0.074	0.114	0.26	0.06	-0.212*
		-34.7	0.246*	0.144*	0.142	0.084	0.174	0.114	0.16	0.16	-0.212*
		-34.6	0.146*	0.144*	0.142	0.084	0.074	0.114	0.16	0.16	-0.112*
		-34.5	0.146*	0.144*	0.242	0.184	0.074	0.114	0.26	0.26	-0.112*
		-34.4	0.146*	0.144*	0.242	0.184	0.074	0.114	0.26	0.26	-0.012*
		-34.3	0.146*	0.144*	0.242	0.184	0.074	0.114	0.26	0.26	-0.012*
		-34.2	0.146*	0.144*	0.242	0.284	0.074	0.114	0.16	0.16	-0.112*
		-34.1	0.146*	0.144*	0.242	0.284	0.074	0.214	0.26	0.16	-0.112*
		-34	0.246*	0.144*	0.242	0.284	0.074	0.214	0.26	0.26	-0.112*
		-33.9	0.246*	0.144*	0.242	0.284	0.074	0.114	0.26	0.26	-0.112*
		-33.8	0.246*	0.144*	0.342	0.284	0.074	0.114	0.26	0.16	-0.112*
		-33.7	0.146*	0.144*	0.342	0.284	-0.026	0.014	0.26	0.16	-0.112*
		-33.6	0.146*	0.144*	0.342	0.284	-0.026	0.014	0.26	0.16	-0.212*
		-33.5	0.146*	0.144*	0.342	0.284	0.074	0.014	0.26	0.16	-0.212*
		-33.4	0.146*	0.144*	0.242	0.284	0.174	0.214	0.26	0.26	-0.112*
		-33.3	0.146*	0.144*	0.242	0.384	0.174	0.214	0.36	0.26	-0.112*
		-33.2	0.146*	0.144*	0.242	0.284	0.174	0.214	0.16	0.16	-0.112*
		-33.1	0.246*	0.244*	0.342	0.384	0.174	0.214	0.16	0.16	-0.112*
		-33	0.246*	0.244*	0.342	0.384	0.174	0.214	0.16	0.16	-0.112*
		-32.9	0.246*	0.244*	0.342	0.384	0.174	0.214	0.16	0.16	-0.112*
		-32.8	0.246*	0.344*	0.342	0.384	0.174	0.214	0.16	0.16	-0.112*
		-32.7	0.246*	0.344*	0.342	0.384	0.074	0.114	0.16	0.16	-0.112*
		-32.6	0.246*	0.344*	0.242	0.284	0.074	0.114	0.26	0.26	-0.112*
		-32.5	0.146*	0.244*	0.242	0.284	0.074	0.114	0.16	0.26	-0.112*
		-32.4	0.146*	0.144*	0.242	0.384	0.074	0.114	0.16	0.16	-0.112*
		-32.3	0.146*	0.144*	0.342	0.384	0.174	0.214	0.16	0.16	-0.112*
		-32.2	0.146*	0.144*	0.242	0.384	0.074	0.114	0.26	0.16	-0.012*
		-32.1	0.146*	0.144*	0.142	0.284	0.074	0.114	0.26	0.16	-0.012*
		-32	0.146*	0.144*	0.142	0.184	0.074	0.114	0.16	0.06	-0.112*
		-31.9	0.146*	0.144*	0.142	0.184	0.074	0.114	0.16	0.06	-0.112*
		-31.8	0.146*	0.144*	0.342	0.284	0.074	0.114	0.16	0.16	-0.112*
		-31.7	0.146*	0.244*	0.342	0.284	0.074	0.114	0.16	0.16	-0.112*
		-31.6	0.146*	0.244*	0.342	0.284	0.074	0.114	0.06	0.16	-0.112*
		-31.5	0.046*	0.144*	0.342	0.284	0.174	0.114	0.16	0.26	-0.112*
		-31.4	0.146*	0.244*	0.242	0.184	0.174	0.114	0.16	0.26	-0.012*
		-31.3	0.146*	0.244*	0.242	0.284	0.174	0.214	0.26	0.26	-0.012*
		-31.2	0.246*	0.244*	0.242	0.284	0.174	0.214	0.16	0.16	0.088*
		-31.1	0.246*	0.244*	0.242	0.284	0.174	0.214	0.16	0.16	-0.012*
		-31	0.246*	0.244*	0.342	0.284	0.074	0.114	0.16	0.16	-0.112*
		-30.9	0.246*	0.344*	0.242	0.284	0.074	0.114	0.16	0.16	-0.112*
		-30.8	0.246*	0.344*	0.242	0.284	0.174	0.114	0.16	0.26	-0.112*
		-30.7	0.146*	0.244*	0.142	0.184	0.174	0.114	0.16	0.26	-0.112*
		-30.6	0.146*	0.144*	0.142	0.184	0.174	0.114	0.26	0.36	-0.012*
		-30.5	0.046*	0.144*	0.242	0.284	0.174	0.214	0.26	0.36	-0.012*
		-30.4	0.046*	0.144*	0.242	0.284	0.174	0.114	0.16	0.26	-0.012*
		-30.3	0.046*	0.144*	0.242	0.384	0.174	0.114	0.26	0.26	0.088*
		-30.2	0.046*	0.144*	0.342	0.384	0.174	0.114	0.16	0.26	0.088*
		-30.1	0.146*	0.144*	0.342	0.384	0.074	0.014	0.16	0.26	-0.012*
		-30	0.046*	0.044*	0.342	0.384	-0.026	0.014	0.16	0.26	-0.012*
		-29.9	0.046*	0.044*	0.142	0.184	0.074	0.114	0.16	0.36	-0.112*
		-29.8	0.046*	0.144*	0.142	0.184	0.074	0.114	0.16	0.26	-0.112*
		-29.7	0.046*	0.144*	0.142	0.184	0.174	0.114	0.16	0.26	-0.112*
		-29.6	0.146*	0.244*	0.242	0.284	0.174	0.214	0.06	0.16	-0.112*
		-29.5	0.146*	0.244*	0.242	0.284	0.174	0.214	0.06	0.16	-0.112*
		-29.4	0.146*	0.244*	0.242	0.284	0.174	0.214	0.16	0.16	-0.012*
		-29.3	0.246*	0.244*	0.242	0.284	0.074	0.114	0.26	0.26	-0.112*
		-29.2	0.246*	0.144*	0.242	0.284	0.074	0.114	0.26	0.36	-0.012*
		-29.1	0.146*	0.244*	0.142	0.184	0.174	0.014	0.26	0.36	-0.012*
		-29	0.146*	0.244*	0.242	0.284	0.174	0.014	0.26	0.36	-0.012*
		-28.9	0.146*	0.244*	0.242	0.284	0.174	0.014	0.26	0.36	-0.012*
		-28.8	0.046*	0.144*	0.242	0.384	0.174	0.014	0.26	0.36	-0.012*
		-28.7	0.146*	0.144*	0.242	0.384	0.174	0.114	0.36	0.36	-0.012*
		-28.6	0.146*	0.144*	0.242	0.384	0.074	0.114	0.26	0.36	-0.012*
		-28.5	0.246*	0.244*	0.242	0.384	0.174	0.114	0.16	0.26	-0.112*
		-28.4	0.246*	0.244*	0.242	0.284	0.074	0.014	0.16	0.26	-0.112*
		-28.3	0.246*	0.344*	0.142	0.184	0.074	0.014	0.16	0.26	-0.112*
		-28.2	0.246*	0.344*	0.142	0.184	0.074	0.014	0.16	0.36	-0.112*
		-28.1	0.246*	0.344*	0.142	0.284	0.074	0.014	0.26	0.36	-0.112*
		-28	0.146*	0.144*	0.242	0.284	0.174	0.114	0.26	0.36	-0.112*
		-27.9	0.246*	0.144*	0.242	0.284	0.174	0.114	0.36	0.36	-0.012*
		-27.8	0.146*	0.144*	0.242	0.384	0.174	0.114	0.36	0.36	-0.012*
		-27.7	0.146*	0.144*	0.242	0.384	0.274	0.114	0.26	0.36	-0.012*
		-27.6	0.146*	0.244*	0.142	0.284	0.174	0.014	0.16	0.36	-0.012*
		-27.5	0.146*	0.244*	0.142	0.284	0.074	0.014	0.16	0.36	-0.012*
		-27.4	0.246*	0.244*	0.142	0.284	0.074	0.014	0.26	0.36	-0.012*
		-27.3	0.346*	0.344*	0.242	0.284	0.074	0.114	0.26	0.36	-0.012*
		-27.2	0.346*	0.344*	0.242	0.284	0.074	0.014	0.26	0.36	-0.012*
		-27.1	0.246*	0.244*	0.242	0.284	0.174	0.014	0.26	0.36	-0.012*
		-27	0.246*	0.144*	0.242	0.384	0.174	0.014	0.26	0.36	-0.112*
		-26.9	0.346*	0.244*	0.242	0.384	0.074	-0.086	0.36	0.46	-0.112*
		-26.8	0.246*	0.244*	0.142	0.284	0.074	0.014	0.36	0.36	-0.012*
		-26.7	0.246*	0.244*	0.242	0.384	-0.026	0.014	0.36	0.36	-0.012*
		-26.6	0.246*	0.244*	0.242	0.384	0.074	0.114	0.26	0.36	-0.012*
		-26.5	0.246*	0.244*	0.242	0.284	0.174	0.114	0.26	0.36	-0.012*
		-26.4	0.146*	0.144*	0.142	0.184	0.174	0.014	0.26	0.36	-0.012*
		-26.3	0.246*	0.144*	0.142	0.184	0.074	-0.086	0.36	0.46	-0.112*
		-26.2	0.246*	0.244*	0.142	0.184	0.074	0.014	0.26	0.36	-0.012*
		-26.1	0.246*	0.244*	0.142	0.184	0.074	0.014	0.26	0.36	-0.012*
		-26	0.146*	0.144*	0.242	0.384	-0.026	0.014	0.26	0.26	-0.112*
		-25.9	0.046*	0.044*	0.142	0.284	0.074	0.014	0.26	0.26	-0.112*
		-25.8	0.146*	0.144*	0.142	0.284	0.074	0.114	0.36	0.26	-0.112*
		-25.7	0.146*	0.144*	0.242	0.284	0.074	0.114	0.36	0.36	-0.012*
		-25.6	0.246*	0.244*	0.242	0.284	0.074	0.114	0.36	0.36	-0.012*
		-25.5	0.146*	0.144*	0.142	0.184	-0.026	-0.086	0.36	0.36	-0.112*
		-25.4	0.146*	0.144*	0.142	0.184	0.174	0.014	0.36	0.36	-0.212*
		-25.3	0.146*	0.144*	0.142	0.284	0.174	0.014	0.26	0.26	-0.112*
		-25.2	0.146*	0.144*	0.142	0.184	0.174	0.014	0.26	0.26	-0.012*
		-25.1	0.146*	0.144*	0.242	0.284	0.174	0.114	0.26	0.26	-0.012*
		-25	0.046*	0.144*	0.242	0.284	0.074	0.114	0.36	0.26	-0.012*
		-24.9	0.246*	0.244*	0.242	0.284	-0.026	0.014	0.26	0.26	-0.112*
		-24.8	0.146*	0.144*	0.142	0.284	-0.026	0.014	0.36	0.26	-0.112*
		-24.7	0.146*	0.144*	0.142	0.284	-0.026	0.014	0.36	0.26	-0.012*
		-24.6	0.146*	0.144*	0.142	0.184	-0.026	0.014	0.36	0.26	-0.112*
		-24.5	0.146*	0.244*	0.242	0.184	-0.126	-0.086	0.26	0.16	-0.112*
		-24.4	0.146*	0.144*	0.242	0.184	0.074	0.014	0.26	0.16	-0.112*
		-24.3	0.146*	0.144*	0.142	0.184	0.074	0.114	0.26	0.16	-0.012*
		-24.2	0.146*	0.144*	0.042	0.084	0.074	0.114	0.16	0.06	-0.012*
		-24.1	0.146*	0.144*	0.142	0.284	-0.026	0.114	0.16	0.06	-0.012*
		-24	0.046*	0.044*	0.142	0.284	-0.026	0.114	0.16	0.06	-0.112*
		-23.9	0.046*	-0.056*	0.142	0.284	-0.126	-0.086	0.06	0.16	-0.212*
		-23.8	0.046*	-0.056*	0.142	0.284	-0.126	-0.086	0.16	0.06	-0.212*
		-23.7	0.046*	-0.056*	0.242	0.284	-0.126	-0.086	0.16	0.06	-0.212*
		-23.6	-0.054*	0.044*	0.142	0.184	-0.126	-0.086	0.16	0.06	-0.112*
		-23.5	-0.054*	0.044*	0.142	0.184	-0.026	-0.086	0.16	0.06	-0.112*
		-23.4	0.046*	0.044*	0.142	0.184	-0.126	-0.186	0.06	-0.04	-0.112*
		-23.3	0.046*	0.044*	0.142	0.084	-0.026	-0.086	0.06	-0.04	-0.112*
		-23.2	0.046*	0.044*	0.142	0.084	-0.026	-0.086	0.06	-0.04	-0.112*
		-23.1	0.046*	0.044*	0.042	0.084	-0.026	-0.086	0.06	-0.04	-0.112*
		-23	0.046*	0.044*	0.142	0.284	-0.026	-0.086	0.06	-0.04	-0.112*
		-22.9	0.046*	0.044*	0.142	0.284	-0.026	-0.086	0.16	0.06	-0.212*
		-22.8	0.046*	0.044*	0.242	0.284	-0.026	-0.086	0.06	-0.04	-0.212*
		-22.7	-0.054*	-0.056*	0.242	0.284	-0.026	-0.186	0.16	0.06	-0.112*
		-22.6	-0.054*	-0.156*	0.142	0.184	-0.126	-0.086	0.16	-0.04	-0.212*
		-22.5	-0.154*	-0.156*	0.142	0.184	-0.026	-0.086	0.16	-0.04	-0.212*
		-22.4	0.046*	0.044*	0.142	0.184	-0.026	-0.086	0.06	-0.04	-0.212*
		-22.3	0.046*	0.044*	0.142	0.284	-0.026	-0.086	0.06	-0.04	-0.212*
		-22.2	0.046*	0.044*	0.142	0.184	-0.026	-0.086	0.06	-0.04	-0.212*
		-22.1	0.046*	0.044*	0.142	0.184	-0.026	-0.086	0.06	-0.04	-0.212*
		-22	0.046*	0.044*	0.142	0.184	-0.126	-0.186	0.06	-0.04	-0.112*
		-21.9	-0.054*	-0.056*	0.142	0.184	-0.126	-0.186	0.16	-0.04	-0.112*
		-21.8	-0.054*	-0.056*	0.142	0.184	-0.026	-0.086	0.06	-0.04	-0.012*
		-21.7	-0.054*	-0.056*	0.142	0.184	-0.026	-0.086	0.06	0.06	-0.012*
		-21.6	0.046*	-0.056*	0.142	0.184	-0.026	-0.086	0.06	0.06	-0.012*
		-21.5	0.046*	-0.056*	0.142	0.184	0.074	-0.086	0.06	0.06	-0.112*
		-21.4	0.046*	0.044*	0.242	0.284	0.074	-0.086	0.06	0.06	-0.112*
		-21.3	0.146*	0.044*	0.242	0.284	0.074	-0.086	0.16	0.06	-0.112*
		-21.2	0.146*	0.044*	0.242	0.384	-0.026	-0.086	0.16	0.06	-0.012*
		-21.1	0.146*	0.044*	0.242	0.384	-0.026	-0.186	0.06	0.06	-0.012*
		-21	0.046*	0.044*	0.242	0.384	-0.026	-0.186	0.16	0.06	-0.012*
		-20.9	-0.054*	-0.056*	0.242	0.384	-0.026	-0.186	0.06	0.06	-0.112*
		-20.8	-0.054*	-0.056*	0.242	0.384	0.074	-0.186	0.06	0.06	-0.112*
		-20.7	-0.054*	-0.056*	0.242	0.284	0.074	-0.086	0.06	0.06	-0.112*
		-20.6	-0.054*	0.044*	0.142	0.284	0.074	-0.086	0.06	0.06	-0.112*
		-20.5	0.046*	0.144*	0.142	0.284	0.174	0.014	0.06	0.06	-0.112*
		-20.4	0.046*	0.144*	0.142	0.284	0.174	0.014	-0.04	0.06	-0.012*
		-20.3	0.046*	0.144*	0.142	0.184	0.174	0.014	0.06	0.06	0.088*
		-20.2	0.046*	0.144*	0.142	0.184	0.074	-0.086	0.06	0.06	0.088*
		-20.1	0.046*	0.044*	0.142	0.184	0.074	-0.086	0.06	0.06	0.088*
		-20	0.146*	0.044*	0.142	0.184	0.074	-0.086	0.06	-0.04	0.088*
		-19.9	0.046*	0.044*	0.242	0.284	0.074	-0.086	0.06	-0.04	-0.012*
		-19.8	0.046*	0.044*	0.042	0.184	-0.026	-0.086	0.06	0.06	-0.112*
		-19.7	-0.054*	-0.056*	0.042	0.184	-0.026	-0.086	0.06	0.06	-0.112*
		-19.6	0.046*	0.044*	0.042	0.184	-0.026	-0.086	0.16	0.16	-0.112*
		-19.5	0.046*	0.144*	0.042	0.284	-0.026	-0.086	0.06	0.16	-0.112*
		-19.4	0.046*	0.144*	0.042	0.284	-0.026	-0.086	0.06	0.16	-0.112*
		-19.3	0.046*	0.144*	0.042	0.284	-0.026	-0.086	0.06	0.16	-0.112*
		-19.2	0.046*	0.144*	0.042	0.184	-0.026	-0.186	0.06	0.16	-0.112*
		-19.1	0.046*	0.144*	0.042	0.184	-0.026	-0.186	0.06	0.16	-0.212*
		-19	0.046*	0.144*	0.042	0.184	-0.026	-0.186	-0.04	0.06	-0.112*
		-18.9	0.046*	0.144*	0.042	0.184	-0.126	-0.286	-0.04	0.06	-0.112*
		-18.8	0.146*	0.144*	-0.058	0.084	-0.126	-0.286	-0.04	0.06	-0.112*
		-18.7	0.146*	0.144*	-0.058	0.084	-0.126	-0.286	-0.04	-0.04	-0.012*
		-18.6	0.146*	0.144*	-0.058	0.084	-0.126	-0.286	-0.04	-0.04	-0.012*
		-18.5	0.046*	0.144*	-0.058	0.084	-0.126	-0.286	-0.04	-0.04	-0.012*
		-18.4	0.046*	0.144*	-0.058	0.084	-0.126	-0.286	-0.04	-0.04	-0.012*
		-18.3	0.146*	0.144*	0.042	0.084	-0.026	-0.186	-0.04	-0.04	-0.112*
		-18.2	0.046*	0.044*	0.042	0.084	-0.026	-0.186	-0.04	-0.04	-0.112*
		-18.1	0.046*	0.044*	0.042	0.084	-0.026	-0.186	0.06	0.06	-0.112*
		-18	0.046*	0.044*	0.042	0.084	-0.026	-0.186	0.06	0.06	-0.112*
		-17.9	0.046*	-0.056*	0.042	0.084	-0.026	-0.186	0.06	0.06	-0.112*
		-17.8	0.046*	-0.056*	0.042	0.084	-0.026	-0.186	0.06	0.06	-0.112*
		-17.7	0.046*	0.044*	0.042	0.084	-0.026	-0.186	-0.04	0.06	-0.112*
		-17.6	0.046*	0.044*	0.042	0.084	-0.026	-0.186	-0.04	0.06	-0.112*
		-17.5	0.046*	0.044*	-0.058	-0.016	-0.026	-0.186	-0.04	0.06	-0.112*
		-17.4	0.046*	0.044*	-0.058	-0.016	-0.026	-0.186	-0.04	0.06	-0.112*
		-17.3	0.046*	0.044*	-0.058	-0.016	-0.026	-0.186	-0.04	0.06	-0.212*
		-17.2	0.046*	-0.056*	-0.058	-0.016	-0.026	-0.286	-0.04	0.06	-0.112*
		-17.1	0.046*	-0.056*	-0.058	-0.016	-0.026	-0.286	-0.04	0.06	-0.212*
		-17	0.046*	-0.056*	-0.058	-0.016	-0.026	-0.286	-0.04	0.06	-0.112*
		-16.9	0.046*	-0.056*	-0.058	-0.016	-0.026	-0.286	-0.04	0.06	-0.112*
		-16.8	0.046*	-0.056*	-0.058	-0.016	-0.026	-0.286	-0.04	0.06	-0.012*
		-16.7	0.046*	-0.056*	-0.058	-0.016	-0.026	-0.286	-0.04	0.06	-0.012*
		-16.6	-0.054*	-0.056*	-0.058	-0.016	-0.026	-0.286	-0.04	0.06	-0.012*
		-16.5	-0.054*	-0.056*	-0.058	-0.016	-0.026	-0.286	-0.04	0.06	-0.012*
		-16.4	-0.054*	-0.056*	-0.058	-0.016	0.074	-0.186	-0.14	0.06	-0.012*
		-16.3	-0.054*	-0.056*	-0.058	-0.016	0.074	-0.186	-0.14	0.06	-0.012*
		-16.2	-0.054*	-0.056*	-0.058	-0.016	0.074	-0.186	-0.14	0.06	-0.012*
		-16.1	-0.054*	-0.056*	-0.058	-0.016	0.074	-0.186	-0.14	0.06	-0.012*
		-16	0.046*	0.044*	0.042	-0.016	-0.026	-0.186	-0.14	-0.04	-0.012*
		-15.9	0.046*	0.044*	0.042	-0.016	-0.026	-0.186	-0.14	-0.04	-0.012*
		-15.8	0.046*	0.044*	0.042	-0.016	-0.026	-0.186	-0.14	-0.04	-0.012*
		-15.7	0.046*	0.044*	0.042	-0.016	-0.026	-0.186	-0.14	-0.04	-0.012*
		-15.6	0.046*	0.044*	0.042	-0.016	-0.026	-0.186	-0.14	-0.04	-0.012*
		-15.5	0.046*	0.044*	0.042	-0.016	-0.026	-0.186	-0.14	-0.04	-0.012*
		-15.4	0.046*	0.044*	0.042	-0.016	-0.026	-0.186	-0.14	-0.04	-0.012*
		-15.3	0.046*	0.044*	0.042	-0.016	-0.026	-0.186	-0.14	-0.04	-0.012*
		-15.2	0.046*	0.044*	0.042	-0.016	-0.026	-0.186	-0.14	-0.04	-0.012*
		-15.1	0.146*	0.144*	0.042	-0.016	-0.026	-0.186	-0.14	-0.04	-0.012*
		-15	0.146*	0.144*	0.042	-0.016	-0.026	-0.186	-0.14	-0.04	-0.012*
		-14.9	0.146*	0.144*	0.042	-0.016	0.074	-0.086	-0.04	0.06	-0.012*
		-14.8	0.046*	0.144*	0.042	-0.016	0.074	-0.086	-0.14	0.06	-0.012*
		-14.7	0.046*	0.144*	0.042	-0.016	0.074	-0.186	-0.14	0.06	-0.012*
		-14.6	0.046*	0.144*	0.042	-0.016	0.074	-0.186	-0.14	0.06	-0.012*
		-14.5	0.046*	0.044*	0.042	-0.116	0.074	-0.186	-0.14	-0.04	-0.012*
		-14.4	0.046*	0.044*	0.042	-0.116	0.074	-0.186	-0.14	-0.04	-0.012*
		-14.3	0.146*	0.144*	0.042	-0.116	0.074	-0.186	-0.14	-0.04	-0.012*
		-14.2	0.146*	0.144*	0.042	-0.116	0.074	-0.186	-0.04	-0.04	-0.012*
		-14.1	0.146*	0.144*	0.142	-0.016	0.074	-0.186	-0.04	-0.04	-0.012*
		-14	0.146*	0.144*	0.142	-0.016	0.074	-0.186	-0.04	-0.04	-0.112*
		-13.9	0.146*	0.144*	0.142	-0.016	0.074	-0.186	-0.04	-0.04	-0.012*
		-13.8	0.146*	0.144*	0.042	-0.016	0.074	-0.186	-0.04	-0.04	-0.012*
		-13.7	0.146*	0.144*	0.042	-0.016	-0.026	-0.186	-0.04	-0.04	-0.012*
		-13.6	0.146*	0.144*	0.042	-0.016	-0.026	-0.186	-0.14	-0.04	-0.012*
		-13.5	0.146*	0.144*	0.042	-0.016	0.074	-0.086	-0.14	-0.04	-0.012*
		-13.4	0.046*	0.144*	0.042	-0.016	0.074	-0.086	-0.14	-0.04	-0.012*
		-13.3	0.146*	0.144*	0.042	-0.016	0.074	-0.086	-0.14	-0.14	-0.012*
		-13.2	0.146*	0.144*	0.042	-0.016	0.074	-0.086	-0.14	-0.14	-0.012*
		-13.1	0.046*	0.044*	0.042	-0.116	0.074	-0.086	-0.04	-0.04	-0.012*
		-13	0.046*	0.044*	0.042	-0.116	0.074	-0.086	-0.04	-0.04	-0.012*
		-12.9	0.046*	0.044*	0.042	-0.116	0.074	-0.086	-0.04	-0.04	-0.012*
		-12.8	0.046*	0.044*	0.042	-0.116	0.074	-0.086	-0.04	-0.04	-0.012*
		-12.7	0.046*	0.044*	0.042	-0.116	0.074	-0.086	-0.04	-0.04	0.088*
		-12.6	0.046*	0.044*	0.042	-0.116	0.074	0.014	-0.04	-0.04	0.088*
		-12.5	0.046*	-0.056*	0.042	-0.116	0.074	0.014	-0.04	-0.04	-0.012*
		-12.4	0.046*	-0.056*	0.042	-0.116	0.074	-0.086	-0.04	-0.04	-0.012*
		-12.3	0.046*	-0.056*	0.042	-0.116	0.074	-0.086	-0.04	-0.04	-0.012*
		-12.2	0.046*	-0.056*	0.042	-0.116	-0.026	-0.086	-0.04	-0.04	-0.012*
		-12.1	0.146*	0.044*	0.042	-0.116	-0.026	-0.086	-0.04	-0.04	-0.012*
		-12	0.146*	0.044*	-0.058	-0.116	0.074	0.014	-0.04	-0.04	-0.012*
		-11.9	0.046*	0.044*	0.042	-0.016	0.074	0.014	-0.14	-0.04	-0.012*
		-11.8	0.046*	0.044*	0.042	-0.016	0.074	0.014	-0.14	-0.04	-0.012*
		-11.7	0.046*	0.044*	0.042	-0.016	0.074	0.014	-0.14	-0.04	-0.012*
		-11.6	0.046*	0.044*	0.042	-0.016	-0.026	-0.086	-0.14	-0.04	-0.012*
		-11.5	0.046*	0.044*	0.042	-0.016	-0.026	-0.086	-0.14	-0.14	-0.012*
		-11.4	0.046*	0.044*	0.042	-0.016	0.074	0.014	-0.14	-0.04	-0.012*
		-11.3	-0.054*	0.044*	0.042	-0.016	0.074	0.014	-0.14	-0.04	-0.012*
		-11.2	-0.054*	0.044*	0.042	-0.016	0.074	0.014	-0.14	-0.04	-0.012*
		-11.1	0.046*	0.044*	0.042	-0.016	-0.026	-0.086	-0.14	-0.04	-0.112*
		-11	0.046*	0.044*	0.042	-0.016	-0.026	-0.086	-0.14	-0.04	-0.112*
		-10.9	0.046*	0.044*	0.042	-0.016	-0.026	-0.086	-0.14	-0.04	-0.012*
		-10.8	0.046*	0.044*	0.042	-0.016	-0.026	-0.086	-0.14	-0.04	-0.012*
		-10.7	0.046*	0.044*	0.042	-0.016	-0.026	-0.086	-0.14	-0.04	-0.012*
		-10.6	0.046*	0.044*	0.042	-0.016	-0.026	-0.086	-0.14	-0.04	-0.012*
		-10.5	0.046*	-0.056*	0.042	-0.016	-0.026	-0.086	-0.14	-0.04	-0.012*
		-10.4	-0.054*	-0.056*	0.042	-0.016	-0.026	-0.086	-0.04	-0.04	-0.012*
		-10.3	-0.054*	-0.056*	-0.058	-0.016	-0.026	-0.086	-0.04	-0.04	-0.012*
		-10.2	0.046*	0.044*	-0.058	-0.116	-0.026	-0.086	-0.04	0.06	-0.012*
		-10.1	-0.054*	-0.056*	-0.058	-0.116	-0.026	-0.186	-0.04	0.06	-0.012*
		-10	-0.054*	-0.056*	-0.058	-0.116	0.074	-0.086	0.06	0.06	-0.012*
		-9.9	-0.054*	-0.056*	0.042	-0.016	0.074	-0.086	0.06	0.06	-0.012*
		-9.8	-0.054*	-0.056*	0.042	-0.016	0.074	-0.086	0.06	-0.04	-0.012*
		-9.7	-0.054*	-0.056*	0.042	-0.016	0.074	-0.086	0.06	-0.04	-0.012*
		-9.6	-0.054*	-0.056*	0.042	-0.016	0.074	-0.086	0.06	-0.04	-0.012*
		-9.5	-0.054*	-0.056*	0.042	-0.016	-0.026	-0.086	0.06	-0.04	-0.012*
		-9.4	-0.054*	-0.056*	0.042	-0.016	-0.026	-0.086	-0.04	-0.04	-0.012*
		-9.3	-0.054*	-0.056*	0.042	-0.016	-0.026	-0.086	-0.04	-0.04	-0.012*
		-9.2	-0.054*	-0.056*	-0.058	-0.016	-0.026	-0.086	-0.04	-0.04	-0.012*
		-9.1	-0.054*	-0.056*	-0.058	-0.016	-0.026	-0.086	-0.04	-0.04	-0.012*
		-9	-0.054*	-0.056*	-0.058	-0.016	-0.026	-0.086	-0.04	-0.04	-0.012*
		-8.9	-0.054*	-0.056*	-0.058	-0.016	-0.026	0.014	-0.04	-0.04	-0.012*
		-8.8	-0.054*	-0.056*	-0.058	-0.016	-0.026	0.014	-0.04	-0.04	-0.112*
		-8.7	-0.054*	-0.056*	-0.058	-0.016	-0.026	0.014	-0.04	-0.04	-0.112*
		-8.6	-0.054*	-0.056*	-0.058	-0.016	-0.026	0.014	-0.04	-0.04	-0.012*
		-8.5	-0.054*	-0.056*	-0.058	-0.016	-0.026	0.014	-0.04	-0.04	-0.012*
		-8.4	-0.054*	-0.056*	-0.058	-0.016	-0.026	0.014	-0.04	-0.04	-0.012*
		-8.3	-0.054*	-0.056*	-0.058	-0.016	-0.026	0.014	-0.04	-0.04	-0.012*
		-8.2	0.046*	0.044*	-0.058	-0.016	-0.026	0.014	-0.04	-0.04	-0.012*
		-8.1	0.046*	0.044*	-0.058	-0.016	-0.026	0.014	-0.04	-0.04	-0.012*
		-8	0.046*	0.044*	-0.058	-0.016	-0.026	0.014	0.06	0.06	-0.012*
		-7.9	0.046*	0.044*	-0.058	-0.016	-0.026	0.014	0.06	0.06	-0.012*
		-7.8	0.046*	0.044*	0.042	0.084	-0.026	0.014	0.06	0.06	-0.012*
		-7.7	0.046*	0.044*	0.042	0.084	-0.026	0.014	0.06	0.06	-0.012*
		-7.6	0.046*	0.044*	0.042	0.084	-0.026	0.014	0.06	0.06	-0.012*
		-7.5	0.046*	0.044*	0.042	0.084	-0.026	0.014	-0.04	0.06	-0.012*
		-7.4	0.046*	0.044*	0.042	0.084	-0.026	0.014	-0.04	0.06	-0.012*
		-7.3	0.046*	0.044*	0.042	0.084	-0.026	0.014	-0.04	0.06	-0.012*
		-7.2	0.046*	0.044*	0.042	0.084	-0.026	0.014	-0.04	0.06	-0.012*
		-7.1	0.046*	0.044*	0.042	0.084	-0.026	0.014	-0.04	0.06	-0.012*
		-7	0.046*	0.044*	0.042	-0.016	-0.026	0.014	-0.04	0.06	-0.012*
		-6.9	0.046*	0.144*	0.042	-0.016	-0.026	0.014	-0.04	0.06	-0.012*
		-6.8	0.046*	0.144*	0.042	-0.016	-0.026	0.014	-0.04	0.06	0.088*
		-6.7	0.046*	0.144*	0.042	-0.016	-0.026	0.014	-0.04	0.06	0.088*
		-6.6	0.046*	0.144*	0.042	-0.016	-0.026	0.014	-0.04	0.06	0.088*
		-6.5	0.046*	0.144*	-0.058	-0.016	-0.026	0.014	-0.04	0.06	0.088*
		-6.4	0.046*	0.144*	0.042	-0.016	-0.026	0.014	0.06	0.06	0.088*
		-6.3	0.046*	0.044*	0.042	-0.016	-0.026	0.014	0.06	0.06	0.088*
		-6.2	0.046*	0.044*	0.042	-0.016	-0.026	0.014	-0.04	-0.04	0.088*
		-6.1	0.046*	0.044*	0.042	-0.016	-0.026	0.014	0.06	-0.04	0.088*
		-6	0.046*	-0.056*	-0.058	-0.016	0.074	0.114	0.06	-0.04	-0.012*
		-5.9	0.046*	-0.056*	-0.058	-0.016	0.074	0.114	0.06	0.06	-0.012*
		-5.8	0.046*	-0.056*	-0.058	-0.016	0.074	0.114	0.06	0.06	-0.012*
		-5.7	0.046*	-0.056*	-0.058	-0.016	0.074	0.114	0.06	0.06	-0.012*
		-5.6	0.046*	-0.056*	0.042	-0.016	-0.026	0.014	0.06	0.06	-0.012*
		-5.5	-0.054*	-0.056*	-0.058	-0.016	-0.026	0.014	0.06	-0.04	-0.012*
		-5.4	-0.054*	-0.056*	0.042	-0.016	0.074	0.014	-0.04	-0.14	-0.012*
		-5.3	-0.054*	-0.056*	0.042	-0.016	0.074	0.014	-0.04	-0.14	-0.012*
		-5.2	-0.054*	-0.056*	0.042	-0.016	0.074	0.014	-0.04	-0.14	-0.012*
		-5.1	-0.054*	-0.056*	0.042	0.084	0.074	0.014	-0.04	-0.14	-0.012*
		-5	-0.054*	-0.056*	0.042	0.084	0.074	0.014	-0.04	-0.14	0.088*
		-4.9	-0.054*	-0.056*	0.042	0.084	0.074	0.014	-0.04	-0.14	0.088*
		-4.8	-0.054*	-0.056*	0.042	0.084	0.074	0.014	-0.04	-0.14	0.088*
		-4.7	-0.054*	-0.056*	0.042	0.084	0.074	0.014	-0.04	-0.14	0.088*
		-4.6	-0.054*	-0.056*	0.042	0.084	0.074	0.014	0.06	-0.04	0.088*
		-4.5	-0.054*	-0.056*	0.042	0.084	0.074	0.014	0.06	-0.04	0.088*
		-4.4	-0.054*	-0.056*	0.042	0.084	0.074	0.014	0.06	-0.04	0.088*
		-4.3	-0.054*	-0.056*	0.042	0.084	0.074	0.014	-0.04	-0.04	-0.012*
		-4.2	-0.054*	-0.056*	0.042	0.084	0.074	0.014	-0.04	-0.04	-0.012*
		-4.1	-0.054*	-0.056*	0.142	0.184	0.074	0.014	0.06	0.06	-0.012*
		-4	-0.054*	-0.056*	0.142	0.184	0.074	0.014	-0.04	-0.04	-0.012*
		-3.9	-0.054*	-0.056*	0.142	0.184	0.074	0.014	-0.04	-0.04	-0.112*
		-3.8	0.046*	0.044*	0.142	0.184	0.074	0.014	-0.04	-0.04	-0.112*
		-3.7	0.046*	0.044*	0.142	0.184	0.074	0.014	-0.04	-0.04	-0.112*
		-3.6	0.046*	-0.056*	0.142	0.184	0.074	0.014	-0.04	-0.04	-0.012*
		-3.5	-0.054*	-0.056*	0.142	0.184	0.074	0.014	-0.04	-0.04	-0.012*
		-3.4	-0.054*	-0.056*	0.142	0.184	0.074	0.014	-0.04	-0.04	-0.012*
		-3.3	-0.054*	-0.056*	0.142	0.184	0.074	0.014	-0.04	-0.04	-0.012*
		-3.2	-0.054*	-0.056*	0.142	0.184	0.074	0.014	-0.04	-0.04	-0.012*
		-3.1	-0.054*	-0.056*	0.142	0.184	0.174	0.114	-0.04	-0.04	-0.012*
		-3	-0.054*	-0.056*	0.142	0.184	0.174	0.114	-0.04	-0.04	-0.012*
		-2.9	-0.054*	-0.056*	0.042	0.084	0.174	0.114	0.16	0.16	-0.012*
		-2.8	-0.054*	-0.056*	0.042	-0.016	0.174	0.114	0.16	0.16	-0.012*
		-2.7	-0.054*	-0.056*	0.142	0.184	0.174	0.114	0.16	0.16	-0.012*
		-2.6	-0.054*	-0.056*	0.142	0.084	0.174	0.114	0.26	0.16	-0.012*
		-2.5	-0.054*	-0.056*	0.142	0.084	0.174	0.014	0.26	0.16	0.088*
		-2.4	-0.054*	-0.156*	0.142	0.084	0.174	0.114	0.26	0.16	0.088*
		-2.3	-0.054*	-0.056*	0.142	0.184	0.074	0.114	0.26	0.16	0.088*
		-2.2	-0.054*	-0.056*	0.042	0.084	0.074	0.114	0.36	0.26	-0.012*
		-2.1	-0.154*	-0.056*	0.142	0.184	0.074	0.114	0.36	0.26	-0.012*
		-2	-0.154*	-0.056*	0.142	0.184	0.074	0.114	0.36	0.16	-0.012*
		-1.9	-0.154*	-0.056*	0.142	0.084	0.074	0.014	0.36	0.16	-0.012*
		-1.8	-0.154*	-0.056*	0.042	0.084	0.074	0.014	0.36	0.16	-0.012*
		-1.7	-0.054*	0.044*	0.042	0.084	0.074	-0.086	0.26	0.06	0.088*
		-1.6	-0.154*	-0.056*	0.142	0.184	0.074	-0.086	0.26	0.06	0.088*
		-1.5	-0.054*	-0.056*	0.142	0.084	0.074	-0.086	0.26	0.16	0.088*
		-1.4	-0.154*	-0.056*	0.142	0.084	0.174	0.014	0.26	0.06	0.088*
		-1.3	-0.054*	-0.056*	0.142	0.084	0.174	0.014	0.26	0.06	0.088*
		-1.2	-0.054*	0.044*	0.142	0.084	0.074	-0.186	0.26	0.06	-0.012*
		-1.1	0.046*	0.144*	0.142	0.084	0.174	-0.186	0.16	-0.04	-0.212*
		-1	0.046*	-0.056*	0.042	-0.016	0.174	-0.086	0.16	0.06	0.088*
		-0.9	0.046*	0.044*	0.042	0.184	-0.126	-0.386	0.26	0.16	-0.212*
		-0.8	-0.154*	0.244*	-2.058	-2.116	-0.726	-0.486	-0.14	-0.14	-1.912*
		-0.7	-0.054*	0.344*	-1.058	-1.916	-1.426	-0.486	-0.94	-0.24	-0.712*
		-0.6	-0.254*	-0.056*	-0.458	-0.716	-0.326	-0.086	-0.24	0.06	-0.412*
		-0.5	-0.054*	0.144*	-0.258	-0.416	-0.226	-0.386	-0.04	-0.14	-0.012*
		-0.4	-0.054*	0.344*	-0.358	-0.316	0.074	-0.286	-0.04	-0.04	0.188*
		-0.3	0.246*	0.444*	0.142	0.284	0.074	-0.286	0.06	-0.04	-0.112*
		-0.2	0.446*	0.244*	0.242	0.384	0.574	0.014	-0.24	-0.24	0.088*
		-0.1	0.146*	-0.156*	1.742	1.484	0.574	0.514	0.16	0.06	0.788*
		0	0.646*	-2.256*	4.642	3.984	2.074	2.214	0.26	0.86	-0.012*
		0.1	0.346*	-5.356*	6.842	6.984	3.874	3.314	0.36	0.06	-2.212*
		0.2	-0.154*	-4.756*	6.642	7.084	3.874	2.914	0.46	-0.14	-1.112*
		0.3	-0.154*	-3.956*	5.542	6.384	3.574	2.914	0.76	0.56	-0.812*
		0.4	-0.354*	-3.456*	5.042	5.084	3.274	3.014	1.06	1.56	-1.012*
		0.5	-0.254*	-2.856*	3.942	4.384	2.474	2.714	1.16	2.16	-0.712*
		0.6	-0.054*	-2.156*	3.542	3.684	2.174	2.314	2.16	3.56	-0.612*
		0.7	0.246*	-1.356*	2.942	3.184	2.074	2.314	2.36	4.16	-0.112*
		0.8	0.046*	-1.456*	2.542	2.984	2.074	2.714	2.96	5.06	0.288*
		0.9	0.146*	-0.456*	2.242	2.684	2.174	2.814	3.36	5.96	-0.212*
		1	0.246*	-0.656*	2.142	2.284	2.074	3.114	4.16	6.86	0.088*
		1.1	0.346*	-0.456*	1.842	2.184	2.274	3.414	4.26	7.26	0.088*
		1.2	0.346*	-0.256*	1.842	2.084	2.274	3.414	4.46	7.86	0.488*
		1.3	0.446*	-0.156*	1.742	1.984	2.274	3.314	5.06	8.56	0.288*
		1.4	0.346*	-0.056*	1.842	2.284	2.274	3.514	5.56	9.06	0.388*
		1.5	0.146*	-0.156*	1.542	2.084	2.474	3.614	5.76	9.26	0.288*
		1.6	0.246*	-0.056*	1.442	2.184	2.574	3.914	6.26	9.86	0.288*
		1.7	0.446*	-0.056*	1.342	1.884	2.674	4.214	6.46	10.16	0.388*
		1.8	0.646*	0.144*	1.242	1.984	2.874	4.514	7.06	10.56	0.488*
		1.9	0.546*	0.344*	1.342	1.984	2.774	4.514	7.16	10.56	0.488*
		2	0.546*	0.544*	1.342	2.084	2.874	4.614	7.46	10.96	0.388*
		2.1	0.646*	0.744*	1.442	2.084	2.974	4.814	7.66	11.16	0.388*
		2.2	0.546*	0.644*	1.442	2.184	3.174	5.114	7.96	11.36	0.288*
		2.3	0.546*	0.644*	1.442	2.184	3.174	5.314	8.16	11.46	0.388*
		2.4	0.446*	0.644*	1.342	2.084	3.174	5.314	8.36	11.66	0.288*
		2.5	0.546*	0.644*	1.442	2.184	3.174	5.414	8.76	11.86	0.488*
		2.6	0.546*	0.544*	1.542	2.284	3.174	5.614	8.86	12.16	0.588*
		2.7	0.346*	0.544*	1.442	2.284	3.474	5.714	9.06	12.26	0.488*
		2.8	0.446*	0.544*	1.542	2.384	3.474	5.814	9.06	12.36	0.488*
		2.9	0.446*	0.744*	1.542	2.284	3.574	5.814	9.26	12.56	0.488*
		3	0.446*	0.744*	1.642	2.484	3.674	5.914	9.56	12.86	0.488*
		3.1	0.446*	0.744*	1.542	2.384	3.874	6.314	9.66	12.96	0.388*
		3.2	0.646*	0.744*	1.642	2.584	4.074	6.514	9.86	13.16	0.488*
		3.3	0.646*	0.744*	1.542	2.384	4.074	6.614	10.06	13.26	0.388*
		3.4	0.746*	0.844*	1.542	2.384	4.074	6.814	10.06	13.26	0.488*
		3.5	0.646*	0.744*	1.542	2.384	4.174	6.914	10.16	13.36	0.588*
		3.6	0.646*	0.744*	1.542	2.484	4.274	7.014	10.36	13.56	0.488*
		3.7	0.646*	0.744*	1.542	2.584	4.474	7.214	10.46	13.46	0.488*
		3.8	0.746*	0.944*	1.642	2.584	4.374	7.314	10.66	13.66	0.488*
		3.9	0.746*	0.944*	1.542	2.584	4.574	7.414	10.76	13.66	0.588*
		4	0.746*	0.844*	1.642	2.684	4.674	7.414	10.86	13.76	0.588*
		4.1	0.746*	0.944*	1.542	2.684	4.574	7.514	11.06	13.86	0.488*
		4.2	0.746*	0.944*	1.542	2.584	4.674	7.614	11.16	13.86	0.488*
		4.3	0.646*	0.844*	1.642	2.784	4.874	7.814	11.26	13.96	0.588*
		4.4	0.746*	0.944*	1.742	2.884	4.974	7.914	11.26	13.96	0.588*
		4.5	0.746*	1.044*	1.742	2.884	4.974	7.914	11.36	13.96	0.588*
		4.6	0.746*	1.044*	1.742	2.884	5.074	8.014	11.46	13.96	0.688*
		4.7	0.746*	1.144*	1.742	2.984	5.174	8.114	11.46	13.86	0.688*
		4.8	0.746*	1.044*	1.742	2.984	5.274	8.214	11.66	14.06	0.588*
		4.9	0.646*	1.044*	1.642	2.884	5.374	8.414	11.76	14.16	0.688*
		5	0.746*	1.144*	1.742	2.984	5.374	8.514	11.86	14.06	0.688*
		5.1	0.646*	1.144*	1.842	3.084	5.374	8.414	11.76	13.96	0.688*
		5.2	0.646*	1.144*	1.842	3.184	5.474	8.614	11.86	14.06	0.588*
		5.3	0.546*	0.944*	1.842	3.184	5.474	8.614	12.06	14.16	0.588*
		5.4	0.546*	1.044*	1.842	3.184	5.474	8.714	11.96	14.06	0.588*
		5.5	0.646*	1.144*	1.942	3.184	5.574	8.814	12.16	14.06	0.588*
		5.6	0.546*	1.044*	2.042	3.484	5.674	8.814	12.26	14.26	0.488*
		5.7	0.446*	0.944*	1.942	3.384	5.674	8.914	12.26	14.26	0.588*
		5.8	0.546*	1.044*	2.042	3.384	5.574	8.914	12.36	14.26	0.588*
		5.9	0.646*	1.144*	2.142	3.584	5.774	9.014	12.26	14.26	0.588*
		6	0.546*	1.044*	2.042	3.484	5.874	9.214	12.46	14.36	0.488*
		6.1	0.546*	1.144*	2.042	3.584	5.774	9.114	12.26	14.36	0.488*
		6.2	0.546*	1.144*	2.042	3.584	5.874	9.214	12.36	14.36	0.388*
		6.3	0.646*	1.144*	2.042	3.584	5.974	9.214	12.36	14.36	0.488*
		6.4	0.546*	1.144*	2.142	3.684	6.074	9.314	12.36	14.26	0.388*
		6.5	0.446*	0.944*	2.142	3.684	6.274	9.514	12.46	14.46	0.488*
		6.6	0.646*	1.144*	2.242	3.884	6.274	9.414	12.46	14.26	0.488*
		6.7	0.546*	1.044*	2.142	3.784	6.374	9.614	12.56	14.46	0.588*
		6.8	0.646*	1.144*	2.042	3.784	6.374	9.514	12.56	14.26	0.488*
		6.9	0.646*	1.044*	2.142	3.884	6.474	9.714	12.56	14.36	0.588*
		7	0.646*	1.144*	2.142	3.784	6.474	9.614	12.56	14.36	0.488*
		7.1	0.746*	1.144*	2.142	3.884	6.574	9.614	12.56	14.16	0.588*
		7.2	0.646*	1.044*	2.242	4.084	6.574	9.714	12.76	14.36	0.688*
		7.3	0.546*	1.044*	2.242	3.884	6.674	9.714	12.56	14.26	0.488*
		7.4	0.646*	1.144*	2.142	3.984	6.474	9.714	12.66	14.36	0.688*
		7.5	0.646*	1.144*	2.242	3.984	6.574	9.714	12.76	14.26	0.688*
		7.6	0.646*	1.144*	2.242	4.084	6.774	9.914	12.66	14.26	0.688*
		7.7	0.746*	1.144*	2.242	4.184	6.774	9.814	12.76	14.26	0.688*
		7.8	0.646*	1.044*	2.342	4.084	6.774	9.814	12.66	14.16	0.688*
		7.9	0.646*	1.144*	2.342	4.184	6.774	9.914	12.76	14.36	0.488*
		8	0.746*	1.144*	2.242	4.084	6.874	9.914	12.66	14.16	0.688*
		8.1	0.746*	1.144*	2.342	4.284	6.774	9.914	12.76	14.26	0.688*
		8.2	0.746*	1.244*	2.342	4.184	6.874	10.014	12.56	14.16	0.588*
		8.3	0.746*	1.244*	2.342	4.284	7.074	10.214	12.76	14.26	0.688*
		8.4	0.846*	1.244*	2.342	4.284	7.074	10.114	12.66	14.16	0.788*
		8.5	0.846*	1.344*	2.342	4.184	6.974	10.114	12.66	14.26	0.688*
		8.6	0.746*	1.244*	2.342	4.284	7.074	10.214	12.76	14.26	0.788*
		8.7	0.846*	1.444*	2.342	4.184	7.074	10.214	12.76	14.26	0.688*
		8.8	0.846*	1.344*	2.342	4.384	7.174	10.214	12.76	14.26	0.788*
		8.9	0.946*	1.344*	2.342	4.184	7.274	10.314	12.86	14.36	0.688*
		9	0.746*	1.344*	2.342	4.284	7.274	10.414	12.86	14.26	0.788*
		9.1	0.946*	1.444*	2.442	4.384	7.174	10.314	12.76	14.26	0.688*
		9.2	0.846*	1.344*	2.342	4.384	7.274	10.314	12.76	14.26	0.788*
		9.3	0.946*	1.444*	2.342	4.384	7.374	10.414	12.96	14.46	0.788*
		9.4	0.746*	1.344*	2.342	4.384	7.374	10.514	12.86	14.26	0.788*
		9.5	0.946*	1.544*	2.442	4.384	7.374	10.614	12.96	14.46	0.688*
		9.6	0.946*	1.344*	2.342	4.484	7.374	10.514	12.96	14.36	0.788*
		9.7	0.946*	1.444*	2.442	4.584	7.374	10.514	12.86	14.26	0.788*
		9.8	0.946*	1.344*	2.442	4.484	7.474	10.614	12.96	14.36	0.688*
		9.9	1.046*	1.344*	2.442	4.584	7.574	10.514	12.86	14.26	0.588*
		10	0.946*	1.344*	2.442	4.584	7.474	10.614	12.76	14.26	0.788*
		10.1	0.946*	1.344*	2.642	4.684	7.474	10.514	12.86	14.26	0.588*
		10.2	0.946*	1.344*	2.542	4.584	7.574	10.614	12.76	14.26	0.688*
		10.3	1.046*	1.544*	2.542	4.584	7.574	10.614	12.86	14.36	0.588*
		10.4	0.946*	1.344*	2.542	4.584	7.574	10.614	12.96	14.36	0.588*
		10.5	0.946*	1.444*	2.742	4.684	7.574	10.714	12.76	14.26	0.588*
		10.6	1.046*	1.444*	2.742	4.684	7.674	10.714	12.86	14.26	0.588*
		10.7	0.946*	1.444*	2.642	4.584	7.674	10.714	12.86	14.36	0.588*
		10.8	0.946*	1.444*	2.642	4.684	7.674	10.814	12.76	14.26	0.588*
		10.9	0.946*	1.444*	2.742	4.684	7.674	10.714	12.76	14.26	0.588*
		11	0.946*	1.544*	2.642	4.584	7.574	10.714	12.66	14.26	0.488*
		11.1	0.946*	1.544*	2.642	4.684	7.674	10.814	12.76	14.36	0.588*
		11.2	0.946*	1.444*	2.642	4.584	7.774	10.914	12.86	14.26	0.588*
		11.3	0.946*	1.444*	2.742	4.584	7.774	10.814	12.86	14.26	0.588*
		11.4	0.946*	1.644*	2.742	4.684	7.874	10.914	12.76	14.26	0.488*
		11.5	0.946*	1.444*	2.742	4.584	7.874	10.914	12.86	14.26	0.688*
		11.6	0.946*	1.544*	2.842	4.684	7.774	10.814	12.76	14.26	0.588*
		11.7	0.846*	1.444*	2.842	4.684	7.774	10.914	12.86	14.36	0.588*
		11.8	0.846*	1.444*	2.842	4.784	7.774	10.814	12.86	14.26	0.588*
		11.9	0.946*	1.544*	2.842	4.784	7.874	10.814	12.76	14.26	0.688*
		12	0.846*	1.544*	2.842	4.784	7.874	10.814	12.86	14.16	0.588*
		12.1	0.946*	1.544*	2.842	4.684	7.874	10.914	12.86	14.26	0.688*
		12.2	0.946*	1.544*	3.042	4.784	7.974	10.914	12.96	14.26	0.588*
		12.3	0.846*	1.644*	3.042	4.884	7.874	10.814	12.86	14.36	0.688*
		12.4	0.846*	1.444*	3.042	4.984	7.974	11.014	12.86	14.16	0.788*
		12.5	0.946*	1.644*	2.942	4.784	7.874	10.814	12.86	14.26	0.688*
		12.6	1.046*	1.644*	2.942	4.884	7.974	10.914	12.76	14.16	0.588*
		12.7	0.846*	1.644*	3.142	5.084	7.874	10.914	12.86	14.26	0.688*
		12.8	0.946*	1.544*	3.042	4.984	7.874	10.814	12.86	14.26	0.788*
		12.9	1.046*	1.744*	2.942	4.884	7.874	10.914	12.86	14.26	0.788*
		13	1.046*	1.744*	2.942	4.884	7.974	10.914	12.86	14.16	0.788*
		13.1	1.046*	1.544*	3.042	4.984	7.874	10.714	12.76	14.16	0.688*
		13.2	0.946*	1.544*	3.042	4.984	7.974	10.914	12.76	14.16	0.688*
		13.3	0.946*	1.644*	2.942	5.084	8.074	10.914	12.76	14.06	0.688*
		13.4	1.046*	1.644*	3.042	4.984	8.074	11.014	12.86	14.16	0.688*
		13.5	1.146*	1.644*	3.042	4.984	7.974	10.814	12.76	14.16	0.788*
		13.6	1.046*	1.744*	3.042	4.984	7.974	10.814	12.76	14.16	0.788*
		13.7	1.046*	1.644*	3.042	5.084	7.974	10.814	12.76	14.16	0.788*
		13.8	1.046*	1.644*	3.042	5.084	8.074	10.914	12.96	14.26	0.588*
		13.9	1.046*	1.644*	3.042	5.084	8.074	10.914	12.96	14.36	0.688*
		14	1.146*	1.744*	3.042	5.084	7.974	10.914	12.96	14.36	0.688*
		14.1	1.146*	1.644*	3.042	4.984	8.074	11.014	12.76	14.26	0.788*
		14.2	1.046*	1.644*	3.042	5.084	8.074	10.914	12.76	14.26	0.788*
		14.3	1.146*	1.644*	3.042	5.084	8.074	10.914	12.86	14.26	0.888*
		14.4	1.146*	1.644*	3.142	5.084	8.074	11.014	12.86	14.26	0.788*
		14.5	1.046*	1.644*	3.042	5.184	8.174	11.014	12.86	14.26	0.788*
		14.6	1.046*	1.644*	3.042	5.184	8.174	11.014	12.86	14.26	0.788*
		14.7	1.146*	1.644*	3.042	5.184	8.074	11.014	12.96	14.26	0.888*
		14.8	1.146*	1.644*	3.142	5.184	8.074	11.014	12.96	14.26	0.788*
		14.9	1.046*	1.744*	3.142	5.184	7.974	10.914	12.96	14.36	0.788*
		15	1.046*	1.744*	3.042	5.084	8.074	10.914	12.86	14.36	0.788*
		15.1	1.046*	1.544*	3.142	5.184	8.074	11.014	12.96	14.26	0.688*
		15.2	1.046*	1.544*	3.142	5.184	8.174	11.014	12.96	14.26	0.788*
		15.3	1.046*	1.644*	3.142	5.284	8.174	11.014	12.96	14.36	0.788*
		15.4	1.046*	1.644*	3.142	5.284	8.174	11.014	12.96	14.36	0.788*
		15.5	1.046*	1.644*	3.142	5.284	7.974	10.914	12.86	14.26	0.788*
		15.6	1.146*	1.644*	3.142	5.284	8.074	10.914	12.86	14.26	0.788*
		15.7	1.146*	1.644*	3.142	5.284	8.074	10.914	12.86	14.26	0.888*
		15.8	1.146*	1.744*	3.242	5.284	8.074	10.914	12.86	14.26	0.788*
		15.9	1.046*	1.744*	3.142	5.284	8.074	11.014	12.96	14.36	0.788*
		16	0.946*	1.644*	3.142	5.284	8.174	11.014	12.96	14.26	0.788*
		16.1	1.046*	1.644*	3.242	5.384	8.174	11.014	12.96	14.26	0.788*
		16.2	1.046*	1.644*	3.142	5.384	8.174	10.914	12.96	14.26	0.788*
		16.3	1.046*	1.744*	3.142	5.284	8.274	11.014	12.96	14.26	0.788*
		16.4	1.046*	1.744*	3.142	5.384	8.174	10.914	12.96	14.26	0.888*
		16.5	1.046*	1.744*	3.242	5.384	8.174	10.914	12.86	14.16	0.888*
		16.6	0.946*	1.644*	3.242	5.384	8.274	10.914	12.96	14.26	0.788*
		16.7	1.046*	1.644*	3.142	5.284	8.274	11.014	12.96	14.16	0.788*
		16.8	1.046*	1.744*	3.242	5.384	8.274	11.014	12.96	14.16	0.888*
		16.9	1.046*	1.744*	3.242	5.384	8.374	11.014	12.96	14.16	0.888*
		17	1.046*	1.744*	3.242	5.384	8.274	10.814	12.96	14.26	0.888*
		17.1	1.046*	1.744*	3.342	5.484	8.274	10.814	13.06	14.26	0.788*
		17.2	1.146*	1.844*	3.342	5.484	8.274	10.914	12.96	14.16	0.788*
		17.3	1.046*	1.844*	3.342	5.484	8.274	10.914	12.96	14.16	0.788*
		17.4	0.946*	1.744*	3.342	5.484	8.274	10.914	12.96	14.16	0.888*
		17.5	0.946*	1.744*	3.342	5.284	8.274	11.014	12.96	14.16	0.888*
		17.6	0.946*	1.844*	3.342	5.384	8.374	11.014	12.96	14.26	0.888*
		17.7	1.046*	1.844*	3.342	5.384	8.374	11.014	12.96	14.26	0.888*
		17.8	1.046*	1.744*	3.442	5.384	8.274	10.914	12.96	14.26	0.888*
		17.9	1.046*	1.744*	3.442	5.484	8.274	11.014	12.96	14.16	0.888*
		18	1.046*	1.844*	3.442	5.484	8.374	11.014	12.96	14.06	0.888*
		18.1	1.046*	1.844*	3.442	5.484	8.374	11.014	12.96	14.16	0.788*
		18.2	1.046*	1.844*	3.342	5.384	8.374	11.014	12.96	14.16	0.788*
		18.3	1.046*	1.744*	3.342	5.484	8.374	11.014	12.96	14.16	0.888*
		18.4	1.046*	1.744*	3.342	5.484	8.474	11.014	12.96	14.16	0.888*
		18.5	1.046*	1.844*	3.342	5.484	8.374	10.914	12.96	14.16	0.888*
		18.6	1.046*	1.844*	3.442	5.484	8.374	10.914	12.96	14.06	0.888*
		18.7	1.146*	1.844*	3.442	5.484	8.474	10.914	12.96	14.16	0.988*
		18.8	1.146*	1.844*	3.442	5.584	8.474	11.014	12.96	14.16	0.988*
		18.9	1.146*	1.844*	3.442	5.584	8.474	11.014	12.96	14.16	0.888*
		19	1.146*	1.944*	3.442	5.484	8.474	11.014	12.96	14.16	0.888*
		19.1	1.146*	1.944*	3.442	5.484	8.574	11.014	13.06	14.16	0.988*
		19.2	1.146*	1.844*	3.442	5.584	8.474	11.014	13.06	14.26	0.988*
		19.3	1.146*	1.844*	3.442	5.584	8.474	11.014	13.06	14.26	0.988*
		19.4	1.146*	1.944*	3.542	5.484	8.374	11.014	12.96	14.16	0.988*
		19.5	1.146*	1.944*	3.542	5.484	8.374	10.914	12.96	14.16	0.988*
		19.6	1.246*	1.944*	3.542	5.484	8.374	10.914	12.96	14.16	0.988*
		19.7	1.246*	1.944*	3.542	5.584	8.374	11.014	13.06	14.26	0.988*
		19.8	1.146*	1.844*	3.442	5.484	8.374	11.014	13.06	14.26	0.988*
		19.9	1.146*	1.944*	3.542	5.484	8.374	11.014	13.06	14.26	0.988*
		20	1.046*	1.844*	3.542	5.484	8.374	10.914	13.06	14.26	1.088*
		20.1	1.046*	1.844*	3.542	5.584	8.374	10.914	12.96	14.26	1.088*
		20.2	1.046*	1.744*	3.542	5.584	8.374	11.014	13.06	14.26	1.088*
		20.3	1.046*	1.844*	3.542	5.584	8.374	11.014	13.06	14.36	1.088*
		20.4	1.046*	1.844*	3.642	5.584	8.374	11.014	13.06	14.36	1.088*
		20.5	1.046*	1.844*	3.542	5.584	8.474	11.014	12.96	14.26	1.088*
		20.6	1.046*	1.844*	3.542	5.584	8.374	10.914	12.96	14.26	1.088*
		20.7	1.046*	1.844*	3.542	5.584	8.374	10.914	12.96	14.36	1.088*
		20.8	1.046*	1.944*	3.542	5.584	8.374	11.014	13.06	14.36	1.088*
		20.9	1.146*	1.944*	3.642	5.584	8.374	11.014	13.06	14.36	0.988*
		21	1.146*	1.944*	3.642	5.584	8.474	11.014	13.06	14.36	1.088*
		21.1	1.046*	1.844*	3.642	5.684	8.474	11.014	13.06	14.36	1.088*
		21.2	1.046*	1.944*	3.642	5.684	8.474	11.014	13.06	14.46	0.888*
		21.3	1.046*	1.944*	3.442	5.584	8.374	11.014	12.96	14.36	0.888*
		21.4	1.146*	1.944*	3.442	5.484	8.374	11.014	12.96	14.36	0.888*
		21.5	1.146*	1.944*	3.542	5.584	8.474	11.014	13.06	14.36	0.888*
		21.6	1.146*	2.044*	3.542	5.584	8.474	11.014	13.06	14.36	0.988*
		21.7	1.146*	2.044*	3.542	5.584	8.474	10.914	13.06	14.36	0.988*
		21.8	1.046*	1.944*	3.542	5.584	8.474	11.014	13.06	14.46	0.988*
		21.9	1.046*	1.944*	3.442	5.584	8.474	11.014	13.06	14.46	0.988*
		22	1.146*	1.944*	3.542	5.584	8.474	11.014	13.06	14.46	0.888*
		22.1	1.146*	1.944*	3.542	5.584	8.374	10.914	13.16	14.46	0.988*
		22.2	1.146*	2.044*	3.542	5.584	8.374	10.914	13.06	14.46	0.988*
		22.3	1.146*	2.044*	3.542	5.684	8.374	10.914	13.06	14.46	0.988*
		22.4	1.046*	1.944*	3.642	5.684	8.374	11.014	13.06	14.46	1.088*
		22.5	1.146*	1.944*	3.642	5.684	8.474	11.014	13.06	14.46	1.088*
		22.6	1.046*	2.044*	3.542	5.584	8.474	11.014	13.06	14.46	0.988*
		22.7	1.046*	2.044*	3.442	5.684	8.374	10.914	13.16	14.56	0.988*
		22.8	1.046*	1.944*	3.442	5.684	8.374	10.914	13.16	14.56	0.988*
		22.9	0.946*	1.844*	3.542	5.584	8.374	11.014	13.06	14.46	0.988*
		23	1.046*	1.844*	3.542	5.584	8.474	11.014	13.06	14.46	0.988*
		23.1	1.046*	1.944*	3.542	5.584	8.474	11.014	13.06	14.56	1.088*
		23.2	1.046*	1.944*	3.542	5.684	8.474	11.014	13.06	14.56	1.088*
		23.3	1.046*	1.944*	3.442	5.584	8.374	10.914	13.16	14.56	0.988*
		23.4	1.046*	1.944*	3.542	5.584	8.374	11.014	13.06	14.56	0.988*
		23.5	0.946*	1.844*	3.542	5.684	8.474	11.014	13.06	14.56	0.988*
		23.6	1.046*	1.944*	3.542	5.684	8.474	11.014	12.96	14.46	0.988*
		23.7	1.046*	1.944*	3.542	5.684	8.474	11.014	12.96	14.56	1.088*
		23.8	1.046*	1.944*	3.542	5.684	8.474	11.014	12.96	14.56	1.088*
		23.9	1.046*	1.944*	3.642	5.684	8.374	10.914	13.06	14.46	1.088*
		24	1.046*	1.844*	3.442	5.684	8.474	11.014	13.06	14.46	0.988*
		24.1	1.046*	1.844*	3.442	5.684	8.374	11.014	13.06	14.46	0.988*
		24.2	1.046*	1.944*	3.442	5.684	8.374	10.914	12.96	14.36	0.988*
		24.3	1.046*	1.944*	3.442	5.684	8.374	10.914	12.96	14.36	0.988*
		24.4	0.946*	1.944*	3.542	5.784	8.374	10.914	12.96	14.36	0.888*
		24.5	1.046*	1.944*	3.542	5.784	8.374	10.914	13.06	14.46	0.888*
		24.6	1.046*	1.944*	3.542	5.784	8.474	11.014	13.06	14.46	0.888*
		24.7	0.946*	1.744*	3.442	5.684	8.374	10.914	12.96	14.36	0.888*
		24.8	0.946*	1.844*	3.542	5.784	8.374	10.914	12.96	14.36	0.888*
		24.9	0.946*	1.844*	3.542	5.684	8.374	10.914	12.96	14.36	0.888*
		25	1.046*	1.844*	3.542	5.684	8.374	10.914	13.06	14.36	0.988*
		25.1	1.146*	1.944*	3.542	5.684	8.474	10.914	13.06	14.46	0.988*
		25.2	1.146*	1.944*	3.542	5.684	8.474	11.014	13.06	14.46	0.888*
		25.3	1.146*	2.044*	3.442	5.584	8.374	10.914	13.06	14.46	0.888*
		25.4	1.046*	1.944*	3.442	5.584	8.374	10.914	13.06	14.36	0.888*
		25.5	1.146*	1.944*	3.442	5.584	8.374	10.914	13.06	14.36	0.888*
		25.6	1.146*	1.944*	3.442	5.584	8.374	10.914	12.96	14.36	0.988*
		25.7	1.146*	1.944*	3.442	5.684	8.374	10.914	12.96	14.46	0.988*
		25.8	1.146*	1.944*	3.542	5.684	8.474	10.914	12.96	14.46	0.988*
		25.9	1.146*	2.044*	3.542	5.684	8.374	10.914	12.96	14.46	0.988*
		26	1.146*	2.044*	3.542	5.684	8.374	10.914	12.96	14.46	0.888*
		26.1	1.246*	2.044*	3.542	5.684	8.374	10.914	12.96	14.36	0.888*
		26.2	1.146*	1.944*	3.442	5.684	8.374	10.914	12.96	14.26	0.988*
		26.3	1.146*	1.944*	3.442	5.684	8.474	10.914	12.96	14.36	0.988*
		26.4	1.146*	1.944*	3.442	5.684	8.374	10.814	12.96	14.36	0.988*
		26.5	1.146*	1.944*	3.442	5.684	8.374	10.814	12.96	14.36	0.988*
		26.6	1.146*	1.944*	3.542	5.684	8.474	10.914	12.96	14.36	0.988*
		26.7	1.146*	2.044*	3.542	5.684	8.474	11.014	12.96	14.36	0.888*
		26.8	1.146*	2.044*	3.542	5.784	8.374	11.014	12.96	14.26	0.888*
		26.9	1.146*	2.044*	3.542	5.784	8.374	11.014	12.96	14.26	0.888*
		27	1.246*	2.044*	3.542	5.784	8.374	10.814	12.96	14.26	0.888*
		27.1	1.246*	2.044*	3.442	5.684	8.374	10.814	12.96	14.36	0.988*
		27.2	1.246*	2.044*	3.442	5.684	8.374	10.814	12.96	14.36	0.988*
		27.3	1.246*	2.044*	3.442	5.684	8.374	10.814	12.96	14.36	0.988*
		27.4	1.246*	2.044*	3.342	5.584	8.374	10.814	12.96	14.36	0.788*
		27.5	1.146*	2.044*	3.442	5.684	8.374	10.914	12.96	14.36	0.888*
		27.6	1.046*	2.044*	3.342	5.584	8.474	11.014	12.96	14.36	0.788*
		27.7	1.046*	2.044*	3.442	5.584	8.474	10.914	13.06	14.36	0.888*
		27.8	1.046*	2.044*	3.442	5.584	8.474	10.914	12.96	14.36	0.888*
		27.9	1.046*	2.044*	3.342	5.484	8.474	10.914	13.16	14.36	0.888*
		28	1.046*	2.044*	3.342	5.484	8.374	10.914	13.06	14.46	0.988*
		28.1	1.046*	2.044*	3.242	5.484	8.474	11.014	12.86	14.36	0.988*
		28.2	1.146*	2.044*	3.342	5.484	8.474	10.914	12.96	14.36	0.788*
		28.3	1.146*	2.044*	3.442	5.584	8.474	11.014	12.96	14.36	0.888*
		28.4	1.046*	2.044*	3.342	5.684	8.474	11.014	12.96	14.46	0.888*
		28.5	1.146*	2.044*	3.442	5.584	8.474	10.914	13.06	14.46	0.888*
		28.6	1.146*	2.044*	3.342	5.584	8.474	10.914	12.96	14.36	0.888*
		28.7	1.046*	2.044*	3.442	5.684	8.374	10.814	12.96	14.36	0.888*
		28.8	1.046*	2.044*	3.442	5.684	8.274	10.814	12.86	14.26	0.888*
		28.9	1.046*	2.044*	3.442	5.584	8.374	10.814	12.86	14.26	0.788*
		29	1.146*	2.244*	3.442	5.584	8.374	10.714	12.96	14.36	0.988*
		29.1	1.046*	2.144*	3.542	5.584	8.274	10.714	12.86	14.16	0.888*
		29.2	0.946*	2.144*	3.542	5.584	8.374	10.714	12.86	14.26	1.088*
		29.3	1.146*	2.244*	3.542	5.584	8.274	10.614	12.76	14.26	0.688*
		29.4	1.246*	2.244*	3.442	5.284	8.174	10.814	12.76	14.06	0.688*
		29.5	1.346*	2.544*	2.842	4.684	7.774	10.314	12.16	13.56	0.188*
		29.6	1.346*	2.044*	2.842	4.784	7.874	10.814	11.96	13.66	-0.012*
		29.7	1.046*	2.344*	1.642	3.684	7.374	10.114	12.36	13.96	-1.212*
		29.8	0.846*	2.144*	3.642	5.284	7.174	10.214	12.26	14.26	1.288*
		29.9	0.646*	2.444*	3.442	6.584	8.474	10.114	12.76	13.96	1.188*
		30	-2.054*	5.444*	-5.158	1.984	4.574	4.414	12.26	10.06	-0.112*
		30.1	0.046*	8.744*	-7.058	-6.816	1.374	5.314	11.66	13.06	2.588*
		30.2	1.046*	6.944*	-4.058	-3.616	4.274	7.414	12.86	14.86	2.588*
		30.3	0.946*	5.744*	-1.658	-0.116	5.474	7.614	12.56	14.36	2.188*
		30.4	1.346*	5.044*	-0.558	1.884	6.374	8.414	12.56	14.16	2.388*
		30.5	0.946*	3.944*	0.442	3.084	6.674	8.614	12.46	13.86	1.788*
		30.6	1.146*	3.344*	1.342	3.784	7.274	9.214	12.46	13.46	1.588*
		30.7	0.946*	3.044*	1.942	4.084	7.374	9.114	12.06	13.46	1.188*
		30.8	1.246*	2.944*	1.942	4.184	7.374	9.414	11.86	13.46	1.088*
		30.9	1.046*	2.844*	2.142	4.284	7.674	9.714	11.76	13.36	0.988*
		31	0.846*	2.544*	2.542	4.584	7.574	9.714	11.96	13.36	0.988*
		31.1	0.946*	2.444*	2.342	4.484	7.474	9.414	11.66	12.96	1.088*
		31.2	1.046*	2.344*	2.342	4.284	7.374	9.514	11.76	13.06	1.088*
		31.3	0.946*	2.344*	2.242	4.184	7.274	9.514	11.56	12.96	1.188*
		31.4	0.946*	2.244*	2.242	3.984	7.274	9.414	11.46	12.56	0.988*
		31.5	0.946*	2.144*	2.542	4.384	7.274	9.214	11.56	12.46	1.188*
		31.6	1.146*	2.244*	2.542	4.584	7.174	9.214	11.46	12.46	0.988*
		31.7	1.346*	2.444*	2.842	4.684	7.074	9.014	11.36	12.36	0.988*
		31.8	1.046*	2.144*	2.742	4.584	6.974	8.914	11.26	12.36	0.988*
		31.9	1.046*	2.144*	2.542	4.584	7.074	9.014	11.06	12.06	0.888*
		32	0.946*	1.944*	2.642	4.684	7.074	8.914	10.76	11.86	0.888*
		32.1	1.146*	2.044*	2.642	4.584	6.874	8.714	10.76	11.86	0.888*
		32.2	1.146*	2.144*	2.642	4.484	6.974	8.814	10.56	11.66	0.788*
		32.3	0.946*	2.044*	2.642	4.484	6.874	8.714	10.46	11.56	0.888*
		32.4	0.946*	2.144*	2.542	4.484	6.774	8.714	10.36	11.46	0.888*
		32.5	0.946*	2.044*	2.542	4.384	6.574	8.514	10.36	11.56	0.988*
		32.6	0.846*	1.944*	2.542	4.284	6.574	8.514	10.26	11.36	0.888*
		32.7	0.846*	2.044*	2.542	4.284	6.574	8.414	10.06	11.26	0.888*
		32.8	1.046*	2.044*	2.542	4.284	6.574	8.314	10.06	11.06	0.888*
		32.9	0.846*	1.944*	2.442	4.184	6.574	8.314	10.06	10.96	0.788*
		33	1.046*	2.044*	2.542	4.284	6.474	8.214	9.86	10.86	0.888*
		33.1	1.046*	2.044*	2.442	4.184	6.474	8.214	9.96	10.86	0.888*
		33.2	0.946*	1.944*	2.442	4.184	6.474	8.114	9.86	10.76	0.788*
		33.3	0.946*	1.844*	2.442	4.184	6.574	8.214	9.86	10.76	0.888*
		33.4	1.046*	2.044*	2.442	4.184	6.374	8.014	9.76	10.66	0.788*
		33.5	0.946*	1.844*	2.442	4.084	6.374	8.014	9.66	10.56	0.688*
		33.6	0.946*	1.844*	2.342	3.984	6.374	7.914	9.56	10.36	0.788*
		33.7	1.046*	1.944*	2.442	3.984	6.274	7.814	9.56	10.36	0.888*
		33.8	1.046*	1.944*	2.442	3.984	6.174	7.914	9.46	10.36	0.888*
		33.9	0.946*	1.944*	2.242	3.884	6.074	7.814	9.36	10.26	0.888*
		34	0.946*	1.844*	2.442	3.984	6.174	7.814	9.06	9.96	0.688*
		34.1	0.946*	1.844*	2.542	3.984	6.074	7.714	9.06	9.96	0.788*
		34.2	1.046*	1.844*	2.442	3.884	5.874	7.614	8.96	9.76	0.788*
		34.3	0.846*	1.644*	2.442	3.984	5.774	7.514	8.86	9.66	0.888*
		34.4	0.946*	1.744*	2.342	3.984	5.874	7.514	8.76	9.56	0.888*
		34.5	0.846*	1.544*	2.342	3.984	5.874	7.414	8.66	9.56	0.888*
		34.6	0.846*	1.744*	2.342	3.884	5.774	7.214	8.56	9.36	0.788*
		34.7	0.646*	1.544*	2.342	3.784	5.774	7.214	8.66	9.46	0.788*
		34.8	0.646*	1.644*	2.342	3.784	5.774	7.314	8.46	9.26	0.788*
		34.9	0.646*	1.644*	2.342	3.784	5.674	7.114	8.46	9.16	0.688*
		35	0.646*	1.644*	2.242	3.584	5.674	7.114	8.26	9.06	0.788*
		35.1	0.646*	1.544*	2.142	3.484	5.574	7.114	8.26	9.06	0.788*
		35.2	0.546*	1.544*	2.142	3.484	5.574	7.014	8.26	8.96	0.788*
		35.3	0.546*	1.444*	2.242	3.584	5.574	7.014	8.16	8.86	0.688*
		35.4	0.646*	1.544*	2.242	3.584	5.574	7.014	8.26	8.96	0.688*
		35.5	0.546*	1.444*	2.142	3.484	5.474	6.914	8.06	8.86	0.688*
		35.6	0.546*	1.444*	2.142	3.484	5.374	6.814	7.96	8.66	0.688*
		35.7	0.546*	1.444*	2.042	3.284	5.374	6.814	7.86	8.66	0.788*
		35.8	0.546*	1.344*	2.142	3.384	5.374	6.814	7.96	8.76	0.888*
		35.9	0.646*	1.444*	2.042	3.384	5.274	6.814	7.76	8.66	0.788*
		36	0.546*	1.444*	2.142	3.384	5.274	6.614	7.66	8.46	0.788*
		36.1	0.546*	1.344*	2.042	3.284	5.374	6.714	7.66	8.46	0.788*
		36.2	0.546*	1.244*	2.042	3.384	5.274	6.614	7.56	8.36	0.788*
		36.3	0.646*	1.244*	2.042	3.384	5.074	6.614	7.46	8.36	0.788*
		36.4	0.646*	1.344*	1.942	3.284	5.074	6.414	7.46	8.16	0.688*
		36.5	0.646*	1.244*	1.942	3.184	5.074	6.514	7.36	8.16	0.788*
		36.6	0.646*	1.244*	2.042	3.284	5.074	6.414	7.36	8.06	0.788*
		36.7	0.546*	1.044*	2.042	3.284	5.074	6.414	7.36	7.96	0.788*
		36.8	0.546*	1.244*	2.042	3.284	4.974	6.314	7.26	7.96	0.688*
		36.9	0.646*	1.244*	1.942	3.184	4.974	6.314	7.16	7.86	0.788*
		37	0.646*	1.244*	2.042	3.184	4.974	6.214	7.16	7.76	0.588*
		37.1	0.546*	1.244*	1.942	3.084	4.774	6.114	7.16	7.76	0.788*
		37.2	0.746*	1.244*	2.042	3.184	4.874	6.114	7.16	7.76	0.688*
		37.3	0.546*	1.244*	1.942	3.184	4.774	6.014	7.06	7.56	0.688*
		37.4	0.546*	1.244*	1.942	3.084	4.674	6.014	6.96	7.46	0.688*
		37.5	0.646*	1.144*	2.142	3.184	4.674	5.914	6.96	7.56	0.588*
		37.6	0.546*	1.244*	1.942	2.984	4.574	5.914	6.96	7.56	0.688*
		37.7	0.646*	1.344*	1.942	2.984	4.574	5.814	6.86	7.46	0.588*
		37.8	0.646*	1.244*	1.942	2.984	4.474	5.714	6.76	7.46	0.588*
		37.9	0.746*	1.344*	1.942	2.884	4.474	5.614	6.66	7.36	0.488*
		38	0.646*	1.244*	1.942	2.984	4.474	5.614	6.76	7.36	0.488*
		38.1	0.646*	1.144*	1.842	2.784	4.474	5.614	6.56	7.26	0.488*
		38.2	0.646*	1.244*	1.742	2.684	4.474	5.614	6.66	7.36	0.488*
		38.3	0.646*	1.244*	1.842	2.784	4.474	5.514	6.46	7.16	0.488*
		38.4	0.646*	1.144*	1.842	2.784	4.374	5.514	6.46	7.26	0.588*
		38.5	0.646*	1.244*	1.842	2.684	4.374	5.414	6.36	7.06	0.488*
		38.6	0.646*	1.144*	1.842	2.784	4.374	5.414	6.36	7.06	0.588*
		38.7	0.646*	1.244*	1.742	2.684	4.374	5.414	6.26	6.86	0.488*
		38.8	0.646*	1.144*	1.842	2.684	4.274	5.214	6.26	6.86	0.488*
		38.9	0.646*	1.144*	1.842	2.684	4.274	5.314	6.06	6.66	0.488*
		39	0.646*	1.244*	1.742	2.484	4.174	5.114	6.26	6.86	0.488*
		39.1	0.646*	1.144*	1.742	2.684	4.174	5.114	6.06	6.66	0.588*
		39.2	0.646*	1.144*	1.742	2.484	4.074	5.114	6.06	6.56	0.388*
		39.3	0.546*	1.144*	1.742	2.584	4.074	5.014	5.96	6.56	0.388*
		39.4	0.546*	1.044*	1.842	2.584	4.074	5.014	5.86	6.46	0.488*
		39.5	0.646*	1.244*	1.742	2.584	3.974	4.814	5.96	6.46	0.588*
		39.6	0.546*	1.044*	1.742	2.584	4.074	4.914	5.86	6.36	0.388*
		39.7	0.646*	1.144*	1.742	2.484	3.974	4.814	5.66	6.26	0.488*
		39.8	0.646*	1.144*	1.742	2.584	3.974	4.914	5.66	6.26	0.388*
		39.9	0.546*	1.044*	1.742	2.484	3.874	4.714	5.66	6.26	0.488*
		40	0.646*	1.144*	1.642	2.484	3.874	4.714	5.56	6.06	0.488*
		40.1	0.646*	1.244*	1.642	2.384	3.874	4.714	5.46	6.06	0.488*
		40.2	0.646*	1.144*	1.642	2.384	3.774	4.614	5.46	5.96	0.488*
		40.3	0.646*	1.144*	1.542	2.384	3.874	4.714	5.46	6.06	0.388*
		40.4	0.746*	1.244*	1.542	2.284	3.674	4.514	5.46	5.96	0.588*
		40.5	0.646*	1.244*	1.642	2.384	3.874	4.614	5.26	5.76	0.488*
		40.6	0.646*	1.244*	1.442	2.284	3.774	4.614	5.26	5.86	0.488*
		40.7	0.746*	1.244*	1.542	2.184	3.774	4.514	5.26	5.66	0.588*
		40.8	0.646*	1.144*	1.542	2.384	3.774	4.514	5.16	5.66	0.388*
		40.9	0.646*	1.244*	1.442	2.184	3.774	4.614	5.26	5.66	0.488*
		41	0.746*	1.144*	1.442	2.084	3.674	4.514	5.06	5.56	0.588*
		41.1	0.546*	1.144*	1.442	2.184	3.774	4.614	5.06	5.56	0.588*
		41.2	0.746*	1.244*	1.442	2.084	3.574	4.414	5.16	5.56	0.488*
		41.3	0.646*	1.144*	1.442	2.084	3.674	4.514	4.96	5.36	0.488*
		41.4	0.746*	1.144*	1.342	1.984	3.574	4.414	4.86	5.46	0.588*
		41.5	0.646*	1.144*	1.342	1.984	3.574	4.314	4.96	5.46	0.488*
		41.6	0.646*	1.044*	1.442	2.084	3.574	4.314	4.86	5.36	0.488*
		41.7	0.746*	1.144*	1.242	1.884	3.474	4.314	4.86	5.36	0.488*
		41.8	0.546*	1.144*	1.242	1.984	3.574	4.314	4.96	5.36	0.488*
		41.9	0.646*	1.044*	1.442	1.984	3.574	4.314	4.86	5.46	0.388*
		42	0.746*	1.144*	1.242	1.884	3.574	4.314	4.96	5.36	0.488*
		42.1	0.646*	1.144*	1.342	1.884	3.574	4.214	4.86	5.36	0.488*
		42.2	0.646*	1.044*	1.342	1.984	3.574	4.114	4.66	5.16	0.488*
		42.3	0.646*	1.144*	1.242	1.884	3.374	4.114	4.86	5.26	0.388*
		42.4	0.646*	1.044*	1.142	1.884	3.574	4.114	4.76	5.26	0.488*
		42.5	0.646*	1.144*	1.142	1.884	3.374	4.014	4.66	5.16	0.488*
		42.6	0.746*	1.044*	1.242	1.784	3.374	4.014	4.56	5.06	0.388*
		42.7	0.646*	1.044*	1.142	1.884	3.174	3.914	4.66	5.16	0.388*
		42.8	0.646*	1.144*	1.142	1.884	3.374	3.914	4.56	5.06	0.488*
		42.9	0.746*	1.144*	1.142	1.784	3.274	3.914	4.46	5.06	0.488*
		43	0.746*	1.144*	1.142	1.884	3.074	3.814	4.56	4.96	0.488*
		43.1	0.646*	1.144*	1.142	1.784	3.174	3.714	4.46	4.96	0.388*
		43.2	0.746*	1.144*	0.942	1.784	3.174	3.914	4.46	4.96	0.488*
		43.3	0.746*	1.044*	1.142	1.884	2.974	3.714	4.36	4.76	0.488*
		43.4	0.646*	1.144*	1.142	1.784	2.974	3.714	4.36	4.86	0.388*
		43.5	0.746*	1.144*	1.042	1.784	3.074	3.814	4.36	4.86	0.388*
		43.6	0.746*	1.244*	1.042	1.884	2.974	3.714	4.46	4.76	0.488*
		43.7	0.646*	1.144*	1.042	1.784	2.874	3.514	4.36	4.56	0.388*
		43.8	0.646*	1.144*	1.042	1.784	2.974	3.714	4.36	4.76	0.388*
		43.9	0.646*	0.944*	1.042	1.784	2.974	3.614	4.26	4.56	0.488*
		44	0.646*	1.044*	1.042	1.784	2.774	3.414	4.26	4.56	0.288*
		44.1	0.746*	1.144*	0.942	1.684	2.874	3.514	4.16	4.56	0.288*
		44.2	0.646*	0.944*	1.042	1.784	2.774	3.414	4.26	4.56	0.388*
		44.3	0.646*	0.944*	0.842	1.584	2.774	3.314	4.16	4.46	0.488*
		44.4	0.646*	1.044*	0.942	1.684	2.674	3.414	4.06	4.46	0.288*
		44.5	0.646*	0.944*	0.942	1.684	2.774	3.314	4.06	4.36	0.288*
		44.6	0.646*	0.944*	0.942	1.684	2.874	3.414	3.86	4.36	0.288*
		44.7	0.646*	0.844*	0.942	1.684	2.674	3.214	3.96	4.36	0.288*
		44.8	0.646*	0.944*	0.842	1.484	2.774	3.314	3.96	4.36	0.288*
		44.9	0.546*	0.944*	0.842	1.684	2.674	3.214	3.76	4.16	0.288*
		45	0.446*	0.744*	0.942	1.684	2.674	3.214	3.86	4.26	0.388*
		45.1	0.546*	0.744*	0.942	1.584	2.574	3.214	3.86	4.26	0.288*
		45.2	0.646*	0.944*	0.842	1.584	2.674	3.214	3.76	4.26	0.288*
		45.3	0.546*	0.844*	0.842	1.584	2.574	3.214	3.76	4.26	0.288*
		45.4	0.546*	0.744*	0.942	1.584	2.574	3.114	3.66	4.16	0.188*
		45.5	0.546*	0.744*	0.942	1.584	2.574	3.214	3.66	4.06	0.288*
		45.6	0.546*	0.844*	0.842	1.484	2.474	3.114	3.66	4.26	0.288*
		45.7	0.546*	0.844*	1.042	1.684	2.574	3.114	3.56	4.06	0.288*
		45.8	0.446*	0.744*	1.042	1.684	2.474	3.114	3.56	4.06	0.188*
		45.9	0.446*	0.744*	0.842	1.484	2.574	3.114	3.66	4.06	0.288*
		46	0.446*	0.744*	0.842	1.484	2.474	3.114	3.56	4.06	0.288*
		46.1	0.446*	0.644*	1.042	1.584	2.474	3.014	3.56	4.06	0.288*
		46.2	0.446*	0.744*	1.042	1.584	2.474	3.014	3.46	3.96	0.188*
		46.3	0.446*	0.844*	0.842	1.484	2.274	3.014	3.56	3.96	0.188*
		46.4	0.446*	0.744*	0.942	1.584	2.374	3.014	3.46	3.96	0.288*
		46.5	0.446*	0.644*	1.042	1.484	2.374	3.014	3.46	3.96	0.288*
		46.6	0.546*	0.744*	0.942	1.484	2.374	2.914	3.36	3.86	0.288*
		46.7	0.446*	0.844*	0.942	1.484	2.274	2.914	3.36	3.76	0.188*
		46.8	0.346*	0.644*	0.842	1.484	2.374	2.914	3.36	3.86	0.188*
		46.9	0.446*	0.644*	1.042	1.484	2.274	2.914	3.46	3.76	0.288*
		47	0.546*	0.744*	0.942	1.484	2.274	2.914	3.36	3.76	0.188*
		47.1	0.346*	0.744*	0.942	1.484	2.374	2.914	3.26	3.66	0.188*
		47.2	0.346*	0.644*	1.042	1.584	2.274	2.814	3.26	3.66	0.288*
		47.3	0.446*	0.644*	0.842	1.484	2.274	2.814	3.26	3.66	0.288*
		47.4	0.546*	0.844*	0.942	1.484	2.274	2.814	3.36	3.66	0.188*
		47.5	0.346*	0.744*	0.942	1.384	2.174	2.814	3.26	3.56	0.088*
		47.6	0.346*	0.644*	0.942	1.484	2.274	2.814	3.16	3.46	0.188*
		47.7	0.446*	0.644*	0.842	1.484	2.274	2.814	3.16	3.46	0.088*
		47.8	0.446*	0.744*	0.942	1.484	2.174	2.614	3.16	3.46	0.188*
		47.9	0.346*	0.644*	0.942	1.384	2.174	2.814	3.16	3.46	0.188*
		48	0.346*	0.644*	0.842	1.484	2.174	2.714	3.06	3.36	0.088*
		48.1	0.446*	0.644*	0.842	1.384	2.274	2.714	3.06	3.36	0.188*
		48.2	0.446*	0.644*	0.942	1.484	2.074	2.714	3.16	3.36	0.088*
		48.3	0.446*	0.744*	0.842	1.384	2.074	2.614	3.06	3.36	0.188*
		48.4	0.346*	0.644*	0.842	1.484	2.174	2.714	2.96	3.26	0.188*
		48.5	0.446*	0.644*	0.842	1.484	2.174	2.714	2.96	3.26	0.088*
		48.6	0.446*	0.644*	0.742	1.384	2.074	2.614	2.86	3.16	0.088*
		48.7	0.346*	0.644*	0.842	1.384	2.074	2.614	3.06	3.26	0.088*
		48.8	0.446*	0.744*	0.842	1.484	2.074	2.514	2.96	3.26	0.088*
		48.9	0.446*	0.744*	0.742	1.384	1.974	2.514	2.86	3.16	0.088*
		49	0.446*	0.644*	0.742	1.384	2.074	2.614	2.86	3.16	0.088*
		49.1	0.346*	0.644*	0.742	1.384	1.974	2.514	2.86	3.06	0.088*
		49.2	0.346*	0.644*	0.742	1.384	1.974	2.514	2.66	3.06	-0.012*
		49.3	0.346*	0.644*	0.742	1.284	1.974	2.414	2.66	2.96	0.088*
		49.4	0.446*	0.644*	0.742	1.284	1.874	2.414	2.76	3.06	0.088*
		49.5	0.346*	0.644*	0.742	1.284	1.974	2.414	2.86	3.06	-0.012*
		49.6	0.346*	0.644*	0.642	1.284	1.974	2.514	2.86	2.96	0.088*
		49.7	0.346*	0.644*	0.642	1.284	1.874	2.414	2.86	2.96	0.088*
		49.8	0.446*	0.644*	0.742	1.384	1.874	2.414	2.66	2.86	0.088*
		49.9	0.446*	0.644*	0.742	1.284	1.874	2.414	2.76	2.96	0.088*
		50	0.246*	0.444*	0.742	1.284	1.974	2.314	2.76	2.96	0.088*
		50.1	0.346*	0.644*	0.742	1.284	1.774	2.314	2.76	2.96	-0.012*
		50.2	0.346*	0.644*	0.642	1.184	1.774	2.214	2.66	2.76	0.088*
		50.3	0.446*	0.644*	0.742	1.184	1.874	2.314	2.66	2.76	0.088*
		50.4	0.346*	0.644*	0.742	1.184	1.774	2.314	2.76	2.86	0.088*
		50.5	0.346*	0.644*	0.742	1.184	1.674	2.214	2.66	2.96	0.188*
		50.6	0.246*	0.544*	0.742	1.284	1.774	2.214	2.66	2.86	0.088*
		50.7	0.346*	0.644*	0.642	1.184	1.774	2.214	2.56	2.86	-0.012*
		50.8	0.446*	0.644*	0.742	1.184	1.674	2.214	2.46	2.76	-0.012*
		50.9	0.446*	0.644*	0.742	1.184	1.674	2.114	2.66	2.76	0.088*
		51	0.346*	0.544*	0.642	0.984	1.774	2.114	2.56	2.76	0.088*
		51.1	0.346*	0.544*	0.642	0.984	1.674	2.114	2.56	2.76	-0.012*
		51.2	0.346*	0.644*	0.642	1.084	1.674	2.214	2.56	2.86	0.088*
		51.3	0.346*	0.644*	0.842	1.184	1.674	2.114	2.46	2.76	-0.012*
		51.4	0.346*	0.644*	0.742	1.184	1.574	2.114	2.36	2.66	-0.012*
		51.5	0.346*	0.544*	0.742	1.084	1.574	2.014	2.36	2.66	0.088*
		51.6	0.346*	0.544*	0.642	0.984	1.474	1.914	2.46	2.76	-0.012*
		51.7	0.346*	0.644*	0.742	0.984	1.674	2.014	2.46	2.66	0.088*
		51.8	0.346*	0.644*	0.742	1.084	1.674	2.014	2.26	2.56	-0.012*
		51.9	0.246*	0.644*	0.742	1.084	1.574	2.014	2.26	2.56	-0.012*
		52	0.346*	0.644*	0.642	0.984	1.574	2.014	2.26	2.56	-0.112*
		52.1	0.346*	0.644*	0.642	0.984	1.674	1.914	2.16	2.56	-0.112*
		52.2	0.346*	0.744*	0.642	0.984	1.574	1.814	2.26	2.56	-0.012*
		52.3	0.346*	0.644*	0.742	0.984	1.474	1.914	2.36	2.56	0.088*
		52.4	0.346*	0.644*	0.642	0.984	1.474	1.814	2.26	2.56	0.088*
		52.5	0.346*	0.644*	0.642	0.984	1.574	1.914	2.16	2.56	-0.112*
		52.6	0.446*	0.644*	0.642	0.984	1.474	1.914	2.16	2.46	-0.112*
		52.7	0.446*	0.644*	0.642	0.884	1.574	1.814	2.26	2.46	-0.112*
		52.8	0.346*	0.644*	0.642	0.884	1.474	1.714	2.26	2.56	-0.012*
		52.9	0.346*	0.644*	0.542	0.884	1.474	1.814	2.26	2.46	-0.112*
		53	0.346*	0.644*	0.642	0.984	1.374	1.814	2.16	2.36	-0.112*
		53.1	0.346*	0.644*	0.642	0.884	1.374	1.714	2.16	2.46	-0.212*
		53.2	0.346*	0.644*	0.542	0.884	1.474	1.814	2.06	2.36	-0.112*
		53.3	0.246*	0.644*	0.542	0.884	1.374	1.814	2.06	2.36	-0.112*
		53.4	0.346*	0.744*	0.642	0.884	1.474	1.714	2.16	2.36	-0.112*
		53.5	0.346*	0.744*	0.542	0.784	1.374	1.614	2.26	2.36	-0.112*
		53.6	0.446*	0.744*	0.442	0.684	1.374	1.614	2.16	2.36	-0.112*
		53.7	0.446*	0.744*	0.442	0.784	1.374	1.714	2.06	2.36	-0.112*
		53.8	0.346*	0.644*	0.442	0.784	1.274	1.714	2.06	2.26	-0.212*
		53.9	0.346*	0.644*	0.542	0.884	1.374	1.614	2.06	2.26	-0.112*
		54	0.446*	0.644*	0.542	0.884	1.374	1.614	2.06	2.36	-0.112*
		54.1	0.446*	0.644*	0.542	0.784	1.274	1.514	2.06	2.26	-0.012*
		54.2	0.446*	0.644*	0.542	0.784	1.274	1.514	2.16	2.26	-0.112*
		54.3	0.346*	0.544*	0.442	0.784	1.274	1.614	2.06	2.36	-0.112*
		54.4	0.246*	0.544*	0.442	0.784	1.274	1.614	2.06	2.36	-0.112*
		54.5	0.246*	0.544*	0.542	0.884	1.174	1.614	1.96	2.16	-0.112*
		54.6	0.346*	0.644*	0.542	0.784	1.174	1.614	1.96	2.16	-0.112*
		54.7	0.446*	0.644*	0.542	0.784	1.274	1.514	1.96	2.16	-0.112*
		54.8	0.446*	0.544*	0.542	0.884	1.174	1.414	2.06	2.26	-0.112*
		54.9	0.346*	0.544*	0.542	0.884	1.074	1.414	2.06	2.16	-0.212*
		55	0.346*	0.544*	0.442	0.784	1.074	1.514	2.06	2.26	-0.112*
		55.1	0.346*	0.544*	0.442	0.784	1.174	1.514	1.96	2.26	-0.112*
		55.2	0.346*	0.544*	0.442	0.784	1.174	1.514	1.86	2.16	-0.112*
		55.3	0.346*	0.544*	0.442	0.684	1.074	1.514	1.86	2.06	-0.112*
		55.4	0.546*	0.644*	0.542	0.784	1.074	1.414	1.96	2.06	-0.112*
		55.5	0.446*	0.544*	0.542	0.884	1.074	1.314	1.96	2.06	-0.112*
		55.6	0.346*	0.544*	0.542	0.884	1.074	1.414	1.86	2.16	-0.112*
		55.7	0.346*	0.544*	0.542	0.884	1.074	1.414	1.96	2.26	-0.112*
		55.8	0.346*	0.544*	0.542	0.784	1.174	1.514	1.96	2.26	-0.112*
		55.9	0.346*	0.544*	0.442	0.784	1.074	1.414	1.96	2.26	-0.112*
		56	0.446*	0.544*	0.442	0.684	1.074	1.414	2.06	2.16	-0.012*
		56.1	0.446*	0.444*	0.442	0.684	1.074	1.414	1.96	2.06	-0.112*
		56.2	0.446*	0.544*	0.542	0.884	0.974	1.314	1.86	2.06	-0.112*
		56.3	0.446*	0.544*	0.542	0.884	0.974	1.314	1.86	2.06	-0.112*
		56.4	0.346*	0.544*	0.542	0.784	0.974	1.314	1.96	2.16	-0.112*
		56.5	0.346*	0.544*	0.542	0.784	0.974	1.314	1.86	2.16	-0.112*
		56.6	0.446*	0.544*	0.542	0.784	0.974	1.314	1.86	2.16	-0.112*
		56.7	0.446*	0.544*	0.342	0.684	0.974	1.314	1.96	2.16	-0.212*
		56.8	0.446*	0.544*	0.542	0.784	0.974	1.314	1.86	2.06	-0.112*
		56.9	0.446*	0.544*	0.542	0.784	0.974	1.214	1.86	1.96	-0.112*
		57	0.446*	0.544*	0.542	0.784	0.974	1.214	1.76	1.96	-0.112*
		57.1	0.446*	0.444*	0.542	0.784	0.974	1.314	1.76	1.96	-0.112*
		57.2	0.446*	0.444*	0.542	0.784	0.974	1.314	1.76	2.06	-0.012*
		57.3	0.346*	0.444*	0.542	0.784	0.974	1.314	1.86	1.96	-0.012*
		57.4	0.346*	0.344*	0.442	0.784	0.874	1.314	1.76	1.96	-0.112*
		57.5	0.346*	0.344*	0.542	0.684	0.874	1.114	1.76	1.96	-0.212*
		57.6	0.346*	0.444*	0.642	0.784	0.974	1.214	1.76	1.86	-0.112*
		57.7	0.446*	0.544*	0.542	0.784	0.974	1.214	1.76	1.86	-0.112*
		57.8	0.446*	0.544*	0.542	0.784	0.974	1.214	1.66	1.86	-0.012*
		57.9	0.446*	0.444*	0.442	0.784	0.874	1.214	1.76	1.86	-0.012*
		58	0.346*	0.344*	0.442	0.784	0.874	1.214	1.76	1.76	-0.012*
		58.1	0.346*	0.344*	0.542	0.684	0.874	1.214	1.76	1.76	-0.112*
		58.2	0.346*	0.344*	0.542	0.784	0.974	1.214	1.66	1.86	-0.212*
		58.3	0.346*	0.344*	0.642	0.884	0.874	1.114	1.66	1.86	-0.212*
		58.4	0.346*	0.444*	0.542	0.784	0.974	1.114	1.66	1.76	-0.212*
		58.5	0.346*	0.444*	0.542	0.784	0.874	1.114	1.56	1.66	-0.112*
		58.6	0.446*	0.344*	0.542	0.784	0.874	1.114	1.46	1.66	-0.112*
		58.7	0.346*	0.344*	0.442	0.684	0.874	1.214	1.56	1.66	-0.112*
		58.8	0.346*	0.344*	0.442	0.684	0.974	1.214	1.56	1.56	-0.112*
		58.9	0.346*	0.344*	0.542	0.684	0.874	1.114	1.56	1.56	-0.112*
		59	0.346*	0.444*	0.542	0.684	0.774	1.014	1.56	1.76	-0.212*
		59.1	0.346*	0.444*	0.542	0.684	0.774	1.014	1.46	1.66	-0.212*
		59.2	0.346*	0.444*	0.542	0.784	0.774	1.014	1.46	1.56	-0.212*
		59.3	0.446*	0.444*	0.542	0.684	0.874	1.014	1.56	1.56	-0.212*
		59.4	0.346*	0.344*	0.542	0.684	0.974	1.114	1.46	1.56	-0.212*
		59.5	0.346*	0.344*	0.442	0.684	0.974	1.214	1.46	1.56	-0.012*
		59.6	0.246*	0.244*	0.442	0.684	0.774	1.114	1.46	1.56	-0.112*
		59.7	0.346*	0.344*	0.442	0.784	0.774	1.014	1.46	1.46	-0.212*
		59.8	0.346*	0.344*	0.542	0.684	0.774	1.014	1.36	1.56	-0.212*
		59.9	0.346*	0.344*	0.542	0.684	0.874	1.014	1.26	1.46	-0.212*
		60	0.346*	0.444*	0.542	0.684	0.874	1.014	1.26	1.46	-0.212*
		60.1	0.346*	0.444*	0.542	0.684	0.774	0.914	1.36	1.46	-0.212*
		60.2	0.246*	0.344*	0.542	0.684	0.774	1.014	1.36	1.56	-0.212*
		60.3	0.246*	0.344*	0.442	0.684	0.774	0.914	1.36	1.56	-0.012*
		60.4	0.346*	0.344*	0.442	0.684	0.774	0.914	1.36	1.46	-0.112*
		60.5	0.346*	0.344*	0.442	0.684	0.874	0.914	1.36	1.56	-0.212*
		60.6	0.346*	0.344*	0.442	0.684	0.874	0.914	1.26	1.46	-0.212*
		60.7	0.346*	0.344*	0.442	0.684	0.874	0.914	1.16	1.46	-0.212*
		60.8	0.346*	0.344*	0.542	0.684	0.774	0.914	1.16	1.36	-0.212*
		60.9	0.346*	0.444*	0.542	0.684	0.674	0.914	1.26	1.36	-0.212*
		61	0.346*	0.444*	0.542	0.684	0.674	0.814	1.26	1.46	-0.212*
		61.1	0.246*	0.344*	0.542	0.584	0.774	0.914	1.26	1.46	-0.212*
		61.2	0.246*	0.344*	0.442	0.684	0.774	0.914	1.36	1.56	-0.012*
		61.3	0.346*	0.344*	0.442	0.684	0.774	0.914	1.26	1.56	-0.112*
		61.4	0.346*	0.344*	0.442	0.684	0.874	0.914	1.16	1.46	-0.212*
		61.5	0.346*	0.344*	0.442	0.584	0.774	0.814	1.16	1.36	-0.212*
		61.6	0.346*	0.344*	0.542	0.584	0.674	0.814	1.16	1.36	-0.212*
		61.7	0.346*	0.344*	0.542	0.584	0.674	0.814	1.06	1.36	-0.212*
		61.8	0.346*	0.444*	0.542	0.684	0.674	0.814	1.06	1.36	-0.212*
		61.9	0.346*	0.444*	0.442	0.684	0.774	0.914	1.16	1.46	-0.112*
		62	0.246*	0.344*	0.442	0.684	0.774	0.914	1.16	1.36	-0.112*
		62.1	0.246*	0.344*	0.442	0.684	0.674	0.814	1.16	1.36	-0.112*
		62.2	0.346*	0.444*	0.442	0.584	0.674	0.814	1.06	1.36	-0.112*
		62.3	0.346*	0.444*	0.442	0.484	0.674	0.714	1.06	1.36	-0.212*
		62.4	0.346*	0.344*	0.442	0.484	0.674	0.714	1.06	1.26	-0.212*
		62.5	0.346*	0.344*	0.442	0.484	0.674	0.714	1.06	1.26	-0.212*
		62.6	0.346*	0.344*	0.442	0.584	0.774	0.914	1.06	1.36	-0.112*
		62.7	0.246*	0.344*	0.342	0.584	0.774	0.914	1.06	1.36	-0.112*
		62.8	0.246*	0.344*	0.342	0.584	0.774	0.914	0.96	1.36	-0.112*
		62.9	0.246*	0.344*	0.342	0.484	0.674	0.814	0.86	1.26	-0.212*
		63	0.246*	0.344*	0.542	0.584	0.674	0.814	0.86	1.16	-0.212*
		63.1	0.246*	0.344*	0.442	0.484	0.574	0.714	0.96	1.16	-0.112*
		63.2	0.146*	0.344*	0.442	0.584	0.574	0.714	0.96	1.16	-0.112*
		63.3	0.146*	0.344*	0.442	0.584	0.574	0.714	0.96	1.16	-0.112*
		63.4	0.146*	0.244*	0.342	0.584	0.674	0.714	0.96	1.26	-0.112*
		63.5	0.246*	0.244*	0.342	0.584	0.674	0.714	0.96	1.16	-0.112*
		63.6	0.246*	0.344*	0.442	0.584	0.674	0.814	0.96	1.26	-0.112*
		63.7	0.246*	0.344*	0.442	0.484	0.674	0.814	0.96	1.26	-0.012*
		63.8	0.246*	0.344*	0.442	0.484	0.674	0.814	0.96	1.16	-0.012*
		63.9	0.246*	0.344*	0.342	0.384	0.574	0.714	0.96	1.16	-0.012*
		64	0.146*	0.344*	0.342	0.484	0.574	0.714	0.96	1.16	-0.112*
		64.1	0.146*	0.344*	0.342	0.484	0.574	0.614	1.06	1.16	-0.112*
		64.2	0.046*	0.244*	0.342	0.484	0.574	0.614	0.96	1.16	-0.112*
		64.3	0.146*	0.244*	0.242	0.384	0.574	0.714	0.96	1.16	-0.112*
		64.4	0.246*	0.244*	0.342	0.384	0.474	0.714	0.96	1.16	-0.112*
		64.5	0.246*	0.244*	0.342	0.484	0.574	0.814	0.86	1.06	-0.112*
		64.6	0.246*	0.244*	0.342	0.484	0.674	0.814	0.86	1.16	-0.012*
		64.7	0.246*	0.344*	0.342	0.484	0.574	0.614	0.86	1.06	-0.012*
		64.8	0.246*	0.344*	0.342	0.484	0.574	0.614	0.86	1.06	-0.112*
		64.9	0.146*	0.344*	0.342	0.484	0.574	0.714	0.76	1.06	-0.212*
		65	0.046*	0.244*	0.342	0.384	0.574	0.714	0.86	1.06	-0.112*
		65.1	0.046*	0.244*	0.342	0.484	0.574	0.714	0.86	1.06	-0.112*
		65.2	0.246*	0.244*	0.242	0.484	0.574	0.714	0.86	1.06	-0.112*
		65.3	0.246*	0.244*	0.342	0.484	0.474	0.614	0.86	0.96	-0.012*
		65.4	0.246*	0.244*	0.342	0.484	0.474	0.614	0.86	0.96	-0.012*
		65.5	0.246*	0.244*	0.342	0.484	0.474	0.514	0.86	0.96	-0.012*
		65.6	0.146*	0.144*	0.342	0.484	0.474	0.614	0.86	0.96	-0.012*
		65.7	0.046*	0.244*	0.342	0.584	0.474	0.614	0.76	1.06	-0.012*
		65.8	0.046*	0.244*	0.342	0.584	0.474	0.614	0.86	1.06	-0.112*
		65.9	0.146*	0.244*	0.342	0.584	0.474	0.514	0.86	0.96	-0.112*
		66	0.146*	0.244*	0.242	0.584	0.474	0.514	0.86	0.96	-0.212*
		66.1	0.146*	0.244*	0.342	0.484	0.474	0.514	0.86	0.96	-0.112*
		66.2	0.246*	0.344*	0.242	0.384	0.474	0.514	0.86	0.96	-0.012*
		66.3	0.246*	0.344*	0.242	0.384	0.574	0.614	0.86	0.96	-0.012*
		66.4	0.246*	0.244*	0.242	0.484	0.474	0.714	0.76	0.96	-0.012*
		66.5	0.146*	0.144*	0.242	0.484	0.374	0.614	0.76	0.86	-0.012*
		66.6	0.146*	0.144*	0.242	0.484	0.474	0.514	0.86	0.86	-0.012*
		66.7	0.146*	0.144*	0.342	0.584	0.474	0.514	0.86	0.86	-0.012*
		66.8	0.146*	0.144*	0.342	0.584	0.474	0.514	0.86	0.86	-0.012*
		66.9	0.146*	0.244*	0.442	0.584	0.474	0.514	0.76	0.86	-0.212*
		67	0.146*	0.244*	0.342	0.584	0.474	0.514	0.76	0.96	-0.212*
		67.1	0.146*	0.244*	0.342	0.484	0.474	0.514	0.76	0.96	-0.212*
		67.2	0.146*	0.244*	0.342	0.484	0.574	0.614	0.76	0.86	-0.212*
		67.3	0.246*	0.244*	0.242	0.384	0.574	0.614	0.66	0.76	-0.012*
		67.4	0.246*	0.244*	0.242	0.384	0.574	0.614	0.66	0.76	-0.012*
		67.5	0.146*	0.144*	0.342	0.584	0.574	0.514	0.86	0.86	-0.012*
		67.6	0.246*	0.144*	0.342	0.584	0.574	0.514	0.76	0.86	-0.012*
		67.7	0.146*	0.144*	0.442	0.584	0.474	0.514	0.76	0.86	-0.212*
		67.8	0.146*	0.144*	0.442	0.584	0.474	0.514	0.76	0.96	-0.212*
		67.9	0.146*	0.144*	0.442	0.584	0.474	0.514	0.76	0.86	-0.212*
		68	0.146*	0.244*	0.342	0.484	0.474	0.514	0.76	0.86	-0.212*
		68.1	0.146*	0.244*	0.342	0.484	0.574	0.714	0.76	0.86	-0.112*
		68.2	0.146*	0.144*	0.242	0.384	0.574	0.714	0.66	0.86	-0.112*
		68.3	0.246*	0.144*	0.242	0.384	0.574	0.614	0.66	0.86	-0.112*
		68.4	0.246*	0.144*	0.242	0.384	0.574	0.614	0.66	0.86	-0.112*
		68.5	0.246*	0.144*	0.242	0.384	0.574	0.614	0.66	0.76	-0.012*
		68.6	0.246*	0.144*	0.342	0.484	0.574	0.614	0.66	0.76	-0.012*
		68.7	0.146*	0.244*	0.342	0.484	0.574	0.614	0.76	0.86	-0.112*
		68.8	0.146*	0.244*	0.442	0.484	0.674	0.714	0.76	0.86	-0.112*
		68.9	0.146*	0.244*	0.442	0.484	0.574	0.614	0.76	0.86	-0.112*
		69	0.146*	0.244*	0.442	0.584	0.574	0.614	0.76	0.86	-0.212*
		69.1	0.146*	0.244*	0.342	0.484	0.574	0.614	0.76	0.86	-0.212*
		69.2	0.146*	0.144*	0.242	0.484	0.474	0.514	0.76	0.86	-0.112*
		69.3	0.246*	0.244*	0.242	0.484	0.474	0.514	0.56	0.76	-0.112*
		69.4	0.246*	0.244*	0.242	0.384	0.674	0.714	0.56	0.76	-0.112*
		69.5	0.246*	0.244*	0.242	0.384	0.674	0.714	0.56	0.76	-0.212*
		69.6	0.346*	0.344*	0.242	0.384	0.674	0.714	0.66	0.76	-0.112*
		69.7	0.346*	0.344*	0.242	0.384	0.674	0.714	0.66	0.76	-0.112*
		69.8	0.246*	0.344*	0.342	0.484	0.674	0.714	0.66	0.76	-0.112*
		69.9	0.146*	0.244*	0.342	0.484	0.574	0.714	0.76	0.86	-0.112*
		70	0.146*	0.244*	0.442	0.484	0.474	0.614	0.76	0.86	-0.112*
		70.1	0.146*	0.144*	0.342	0.384	0.574	0.614	0.76	0.86	-0.212*
		70.2	0.146*	0.144*	0.242	0.384	0.574	0.614	0.76	0.86	-0.212*
		70.3	0.146*	0.144*	0.242	0.384	0.574	0.614	0.66	0.86	-0.112*
		70.4	0.146*	0.144*	0.242	0.384	0.574	0.614	0.66	0.86	-0.112*
		70.5	0.146*	0.244*	0.242	0.384	0.674	0.814	0.66	0.86	-0.112*
		70.6	0.246*	0.244*	0.242	0.384	0.574	0.714	0.66	0.86	-0.112*
		70.7	0.146*	0.244*	0.242	0.384	0.574	0.714	0.66	0.76	-0.112*
		70.8	0.246*	0.344*	0.142	0.384	0.574	0.714	0.76	0.86	-0.112*
		70.9	0.246*	0.344*	0.142	0.384	0.574	0.714	0.76	0.86	-0.112*
		71	0.146*	0.244*	0.142	0.384	0.674	0.714	0.76	0.86	-0.112*
		71.1	0.146*	0.144*	0.242	0.384	0.674	0.714	0.76	0.96	-0.212*
		71.2	0.146*	0.144*	0.242	0.384	0.674	0.714	0.76	0.96	-0.212*
		71.3	0.146*	0.244*	0.242	0.284	0.474	0.614	0.76	0.96	-0.212*
		71.4	0.146*	0.244*	0.242	0.284	0.474	0.614	0.66	0.86	-0.212*
		71.5	0.146*	0.244*	0.242	0.284	0.474	0.614	0.66	0.86	-0.212*
		71.6	0.146*	0.244*	0.142	0.284	0.574	0.714	0.76	0.86	-0.212*
		71.7	0.146*	0.244*	0.142	0.384	0.574	0.814	0.66	0.76	-0.312*
		71.8	0.146*	0.244*	0.142	0.384	0.574	0.814	0.66	0.76	-0.212*
		71.9	0.146*	0.244*	0.042	0.284	0.674	0.814	0.76	0.96	-0.112*
		72	0.146*	0.244*	0.142	0.384	0.674	0.814	0.76	0.96	-0.112*
		72.1	0.146*	0.244*	0.142	0.284	0.674	0.714	0.66	0.96	-0.112*
		72.2	0.146*	0.244*	0.142	0.284	0.674	0.714	0.66	0.86	-0.112*
		72.3	0.146*	0.244*	0.142	0.284	0.574	0.614	0.66	0.86	-0.212*
		72.4	0.046*	0.244*	0.142	0.284	0.574	0.614	0.56	0.76	-0.112*
		72.5	0.046*	0.244*	0.142	0.384	0.474	0.614	0.56	0.76	-0.112*
		72.6	0.146*	0.244*	0.142	0.384	0.474	0.614	0.46	0.76	-0.212*
		72.7	0.146*	0.244*	0.142	0.384	0.474	0.614	0.46	0.86	-0.212*
		72.8	0.046*	0.244*	0.142	0.284	0.474	0.714	0.56	0.76	-0.212*
		72.9	0.046*	0.144*	0.142	0.284	0.474	0.714	0.56	0.76	-0.212*
		73	0.046*	0.144*	0.042	0.284	0.674	0.714	0.66	0.86	-0.312*
		73.1	0.046*	0.144*	0.142	0.284	0.674	0.714	0.66	0.86	-0.212*
		73.2	0.046*	0.144*	0.142	0.284	0.674	0.714	0.66	0.86	-0.112*
		73.3	0.046*	0.144*	0.142	0.284	0.674	0.714	0.56	0.76	-0.112*
		73.4	0.146*	0.144*	0.142	0.284	0.574	0.614	0.46	0.76	-0.112*
		73.5	0.046*	0.144*	0.142	0.384	0.574	0.614	0.46	0.76	-0.112*
		73.6	0.046*	0.144*	0.142	0.384	0.474	0.614	0.56	0.76	-0.112*
		73.7	0.046*	0.244*	0.142	0.284	0.474	0.614	0.56	0.76	-0.112*
		73.8	0.046*	0.244*	0.142	0.284	0.474	0.714	0.56	0.66	-0.112*
		73.9	-0.054*	0.144*	0.042	0.284	0.474	0.614	0.46	0.76	-0.112*
		74	-0.054*	0.044*	0.142	0.284	0.474	0.614	0.36	0.66	-0.112*
		74.1	0.046*	0.144*	0.142	0.284	0.574	0.614	0.36	0.66	-0.212*
		74.2	0.046*	0.144*	0.142	0.284	0.574	0.614	0.36	0.66	-0.212*
		74.3	0.046*	0.144*	0.142	0.284	0.574	0.614	0.26	0.66	-0.112*
		74.4	0.146*	0.144*	0.142	0.384	0.574	0.614	0.36	0.76	-0.012*
		74.5	0.146*	0.144*	0.142	0.384	0.574	0.614	0.46	0.76	-0.012*
		74.6	0.146*	0.244*	0.142	0.384	0.474	0.714	0.46	0.76	-0.012*
		74.7	0.146*	0.244*	0.042	0.384	0.474	0.614	0.46	0.66	-0.112*
		74.8	0.146*	0.244*	0.042	0.384	0.474	0.614	0.46	0.76	-0.112*
		74.9	0.046*	0.244*	0.142	0.284	0.474	0.614	0.46	0.76	-0.112*
		75	-0.054*	0.044*	0.242	0.384	0.474	0.614	0.36	0.76	-0.112*
		75.1	-0.054*	0.044*	0.242	0.384	0.574	0.614	0.36	0.76	-0.112*
		75.2	-0.054*	0.044*	0.242	0.384	0.574	0.614	0.36	0.76	-0.112*
		75.3	-0.054*	0.044*	0.142	0.284	0.474	0.514	0.26	0.66	-0.012*
		75.4	0.046*	0.044*	0.142	0.284	0.374	0.514	0.36	0.66	-0.012*
		75.5	0.046*	0.044*	0.242	0.284	0.474	0.614	0.26	0.56	-0.112*
		75.6	0.146*	0.244*	0.242	0.384	0.474	0.614	0.26	0.56	-0.112*
		75.7	0.146*	0.244*	0.142	0.384	0.474	0.614	0.26	0.56	-0.012*
		75.8	0.146*	0.244*	0.142	0.384	0.474	0.614	0.36	0.66	-0.012*
		75.9	0.146*	0.244*	0.142	0.384	0.474	0.614	0.36	0.66	-0.012*
		76	0.046*	0.144*	0.242	0.484	0.474	0.614	0.36	0.76	-0.012*
		76.1	-0.054*	0.144*	0.142	0.384	0.474	0.614	0.36	0.76	0.088*
		76.2	-0.054*	0.144*	0.042	0.384	0.374	0.414	0.36	0.66	0.088*
		76.3	-0.054*	0.144*	0.042	0.384	0.374	0.414	0.46	0.66	-0.012*
		76.4	-0.054*	0.044*	0.142	0.284	0.374	0.514	0.46	0.66	-0.112*
		76.5	0.046*	0.044*	0.142	0.284	0.374	0.514	0.36	0.66	-0.112*
		76.6	0.046*	0.044*	0.142	0.284	0.374	0.514	0.36	0.66	-0.112*
		76.7	0.046*	0.144*	0.142	0.284	0.374	0.514	0.36	0.66	-0.112*
		76.8	0.146*	0.244*	0.142	0.284	0.474	0.614	0.36	0.66	-0.112*
		76.9	0.146*	0.244*	0.142	0.284	0.474	0.414	0.26	0.56	-0.012*
		77	0.146*	0.244*	0.242	0.384	0.474	0.414	0.26	0.56	-0.012*
		77.1	0.146*	0.244*	0.042	0.284	0.474	0.414	0.36	0.66	-0.012*
		77.2	0.046*	0.144*	0.142	0.284	0.374	0.514	0.36	0.66	-0.012*
		77.3	0.046*	0.144*	0.142	0.284	0.374	0.514	0.46	0.56	-0.012*
		77.4	0.046*	0.144*	0.142	0.284	0.374	0.514	0.46	0.56	-0.112*
		77.5	-0.054*	0.044*	0.142	0.284	0.374	0.514	0.46	0.66	-0.112*
		77.6	0.046*	0.144*	0.142	0.284	0.374	0.514	0.46	0.66	-0.112*
		77.7	0.046*	0.144*	0.142	0.284	0.474	0.614	0.46	0.66	-0.112*
		77.8	0.046*	0.144*	-0.058	0.184	0.474	0.514	0.46	0.66	-0.112*
		77.9	0.046*	0.144*	-0.058	0.184	0.474	0.514	0.36	0.66	-0.112*
		78	0.046*	0.144*	0.042	0.184	0.474	0.514	0.36	0.66	-0.112*
		78.1	0.046*	0.144*	0.042	0.084	0.374	0.514	0.56	0.76	-0.112*
		78.2	0.046*	0.144*	0.042	0.184	0.374	0.414	0.56	0.66	-0.112*
		78.3	0.046*	0.144*	0.142	0.284	0.374	0.414	0.46	0.56	-0.012*
		78.4	0.146*	0.044*	0.142	0.284	0.374	0.514	0.46	0.56	-0.012*
		78.5	0.046*	0.044*	0.142	0.284	0.374	0.514	0.46	0.66	-0.012*
		78.6	0.046*	0.044*	0.142	0.284	0.374	0.414	0.46	0.66	-0.112*
		78.7	0.046*	0.044*	0.042	0.184	0.374	0.414	0.46	0.66	-0.112*
		78.8	0.046*	0.144*	0.042	0.184	0.374	0.414	0.46	0.66	-0.212*
		78.9	-0.054*	0.044*	0.042	0.184	0.274	0.414	0.46	0.56	-0.212*
		79	0.046*	0.144*	0.042	0.184	0.274	0.314	0.56	0.66	-0.112*
		79.1	0.046*	0.144*	0.042	0.084	0.374	0.414	0.66	0.66	-0.112*
		79.2	0.046*	0.144*	0.042	0.084	0.374	0.414	0.66	0.66	-0.112*
		79.3	0.046*	0.144*	0.042	0.084	0.474	0.414	0.46	0.56	-0.012*
		79.4	0.146*	0.144*	0.142	0.184	0.474	0.414	0.46	0.56	-0.012*
		79.5	0.146*	0.144*	0.042	0.084	0.374	0.314	0.46	0.56	-0.012*
		79.6	0.046*	0.144*	0.042	0.184	0.274	0.314	0.46	0.56	-0.012*
		79.7	0.046*	0.044*	0.042	0.184	0.274	0.314	0.46	0.56	-0.012*
		79.8	0.046*	0.144*	0.042	0.184	0.274	0.414	0.46	0.56	-0.012*
		79.9	0.046*	0.144*	0.042	0.084	0.274	0.414	0.46	0.56	-0.012*
		80	0.046*	0.144*	0.042	0.084	0.374	0.414	0.46	0.66	-0.012*
		80.1	0.046*	0.044*	0.042	0.084	0.374	0.414	0.36	0.56	-0.112*
		80.2	0.146*	0.144*	0.042	0.084	0.374	0.414	0.56	0.56	-0.112*
		80.3	0.146*	0.144*	0.142	0.184	0.374	0.414	0.56	0.56	-0.212*
		80.4	0.146*	0.144*	0.242	0.184	0.374	0.414	0.56	0.56	-0.212*
		80.5	0.146*	0.044*	0.142	0.184	0.374	0.414	0.56	0.56	-0.012*
		80.6	0.146*	0.044*	0.142	0.284	0.274	0.314	0.56	0.56	-0.012*
		80.7	0.046*	0.044*	0.142	0.284	0.274	0.314	0.46	0.56	-0.012*
		80.8	0.046*	0.144*	0.042	0.184	0.374	0.314	0.46	0.56	-0.012*
		80.9	0.046*	0.144*	0.042	0.184	0.374	0.314	0.36	0.56	-0.012*
		81	0.046*	0.144*	0.042	0.184	0.374	0.514	0.46	0.46	-0.012*
		81.1	0.046*	0.144*	0.142	0.284	0.374	0.414	0.46	0.46	-0.012*
		81.2	0.146*	0.244*	0.142	0.284	0.374	0.414	0.56	0.56	-0.012*
		81.3	0.146*	0.244*	0.142	0.284	0.374	0.414	0.56	0.56	-0.112*
		81.4	0.246*	0.244*	0.142	0.284	0.374	0.414	0.56	0.56	-0.012*
		81.5	0.146*	0.044*	0.042	0.184	0.274	0.314	0.56	0.56	-0.112*
		81.6	0.146*	0.044*	0.042	0.184	0.174	0.314	0.46	0.66	-0.112*
		81.7	0.146*	0.144*	0.042	0.184	0.174	0.314	0.36	0.56	-0.012*
		81.8	0.146*	0.144*	0.142	0.284	0.274	0.214	0.36	0.46	-0.012*
		81.9	0.046*	0.144*	0.242	0.384	0.274	0.214	0.36	0.46	-0.012*
		82	0.046*	0.144*	0.242	0.384	0.374	0.314	0.36	0.46	-0.012*
		82.1	0.146*	0.244*	0.142	0.284	0.374	0.314	0.36	0.46	-0.012*
		82.2	0.146*	0.244*	0.142	0.284	0.374	0.414	0.36	0.46	-0.012*
		82.3	0.146*	0.244*	0.142	0.284	0.374	0.414	0.46	0.46	-0.012*
		82.4	0.246*	0.244*	0.142	0.284	0.374	0.414	0.26	0.36	-0.012*
		82.5	0.246*	0.144*	0.142	0.284	0.374	0.314	0.26	0.46	-0.012*
		82.6	0.146*	0.144*	0.142	0.384	0.374	0.314	0.26	0.46	-0.012*
		82.7	0.146*	0.144*	0.242	0.384	0.374	0.314	0.36	0.56	-0.112*
		82.8	0.146*	0.144*	0.242	0.384	0.374	0.214	0.36	0.56	-0.012*
		82.9	0.146*	0.144*	0.242	0.284	0.374	0.214	0.36	0.56	-0.012*
		83	0.146*	0.144*	0.242	0.284	0.474	0.314	0.36	0.46	-0.012*
		83.1	0.146*	0.144*	0.242	0.284	0.374	0.414	0.36	0.46	-0.012*
		83.2	0.146*	0.144*	0.142	0.284	0.374	0.314	0.36	0.46	-0.012*
		83.3	0.046*	0.144*	0.142	0.284	0.374	0.314	0.36	0.46	-0.012*
		83.4	0.246*	0.244*	0.142	0.284	0.374	0.314	0.26	0.46	-0.012*
		83.5	0.246*	0.144*	0.142	0.284	0.374	0.314	0.26	0.46	0.088*
		83.6	0.246*	0.244*	0.142	0.284	0.374	0.314	0.26	0.46	-0.012*
		83.7	0.246*	0.244*	0.142	0.284	0.374	0.314	0.26	0.36	-0.012*
		83.8	0.246*	0.244*	0.242	0.384	0.474	0.414	0.16	0.36	-0.112*
		83.9	0.246*	0.244*	0.242	0.384	0.474	0.414	0.26	0.36	-0.012*
		84	0.246*	0.244*	0.242	0.384	0.474	0.414	0.26	0.36	-0.012*
		84.1	0.246*	0.244*	0.242	0.284	0.574	0.414	0.36	0.46	-0.012*
		84.2	0.246*	0.244*	0.242	0.284	0.574	0.414	0.36	0.46	-0.112*
		84.3	0.146*	0.144*	0.142	0.284	0.374	0.314	0.26	0.36	-0.112*
		84.4	0.146*	0.344*	0.142	0.284	0.374	0.314	0.26	0.36	-0.112*
		84.5	0.146*	0.344*	0.142	0.284	0.374	0.314	0.26	0.26	-0.112*
		84.6	0.146*	0.344*	0.142	0.284	0.374	0.314	0.16	0.26	-0.212*
		84.7	0.246*	0.244*	0.142	0.284	0.374	0.314	0.16	0.26	-0.112*
		84.8	0.246*	0.244*	0.142	0.284	0.374	0.414	0.26	0.36	-0.112*
		84.9	0.246*	0.244*	0.242	0.384	0.374	0.414	0.26	0.36	-0.012*
		85	0.246*	0.244*	0.242	0.284	0.374	0.414	0.26	0.36	-0.012*
		85.1	0.246*	0.244*	0.242	0.284	0.474	0.414	0.26	0.36	-0.012*
		85.2	0.246*	0.244*	0.142	0.284	0.474	0.514	0.36	0.46	-0.012*
		85.3	0.246*	0.244*	0.142	0.184	0.474	0.414	0.36	0.46	-0.112*
		85.4	0.146*	0.144*	0.142	0.184	0.474	0.414	0.36	0.36	-0.112*
		85.5	0.146*	0.144*	0.142	0.184	0.374	0.414	0.26	0.36	-0.112*
		85.6	0.146*	0.144*	0.142	0.284	0.374	0.414	0.16	0.26	-0.112*
		85.7	0.246*	0.244*	0.142	0.284	0.374	0.414	0.26	0.26	-0.212*
		85.8	0.346*	0.144*	0.142	0.284	0.374	0.414	0.26	0.26	-0.212*
		85.9	0.346*	0.144*	0.142	0.284	0.374	0.414	0.26	0.26	-0.212*
		86	0.346*	0.244*	0.142	0.284	0.374	0.414	0.26	0.26	-0.112*
		86.1	0.246*	0.244*	0.142	0.284	0.374	0.314	0.26	0.16	-0.012*
		86.2	0.246*	0.244*	0.142	0.084	0.474	0.414	0.26	0.16	-0.012*
		86.3	0.246*	0.244*	0.142	0.084	0.474	0.414	0.26	0.16	-0.012*
		86.4	0.246*	0.244*	0.142	0.084	0.474	0.414	0.36	0.26	-0.112*
		86.5	0.246*	0.244*	0.242	0.184	0.474	0.414	0.36	0.36	-0.112*
		86.6	0.246*	0.244*	0.242	0.184	0.474	0.514	0.36	0.36	-0.112*
		86.7	0.146*	0.144*	0.142	0.284	0.474	0.514	0.46	0.36	-0.112*
		86.8	0.146*	0.144*	0.142	0.284	0.474	0.514	0.46	0.36	-0.112*
		86.9	0.146*	0.144*	0.142	0.284	0.374	0.514	0.36	0.16	-0.212*
		87	0.246*	0.144*	0.142	0.284	0.274	0.414	0.26	0.16	-0.212*
		87.1	0.246*	0.144*	0.142	0.284	0.274	0.414	0.26	0.16	-0.112*
		87.2	0.346*	0.244*	0.042	0.184	0.274	0.414	0.26	0.16	-0.112*
		87.3	0.346*	0.144*	0.042	0.184	0.474	0.514	0.26	0.16	-0.012*
		87.4	0.246*	0.244*	0.042	0.184	0.474	0.414	0.36	0.26	-0.012*
		87.5	0.246*	0.244*	0.042	0.084	0.474	0.414	0.36	0.26	-0.012*
		87.6	0.246*	0.244*	0.042	0.184	0.474	0.514	0.46	0.26	-0.012*
		87.7	0.246*	0.244*	0.042	0.184	0.474	0.514	0.46	0.26	-0.112*
		87.8	0.246*	0.244*	0.042	0.184	0.474	0.514	0.46	0.26	-0.112*
		87.9	0.146*	0.144*	0.042	0.184	0.374	0.414	0.46	0.36	-0.112*
		88	0.146*	0.144*	0.042	0.184	0.374	0.414	0.36	0.16	-0.212*
		88.1	0.146*	0.144*	-0.058	0.084	0.474	0.414	0.36	0.16	-0.212*
		88.2	0.146*	0.144*	-0.058	0.084	0.474	0.414	0.36	0.16	-0.212*
		88.3	0.346*	0.244*	-0.058	0.084	0.474	0.414	0.36	0.16	-0.112*
		88.4	0.346*	0.144*	0.042	0.184	0.574	0.514	0.46	0.26	-0.112*
		88.5	0.346*	0.144*	0.042	0.184	0.474	0.514	0.46	0.26	-0.112*
		88.6	0.346*	0.244*	0.042	0.184	0.474	0.514	0.46	0.26	-0.112*
		88.7	0.246*	0.144*	0.042	0.184	0.474	0.514	0.36	0.26	-0.112*
		88.8	0.246*	0.144*	0.042	0.184	0.474	0.514	0.36	0.26	-0.112*
		88.9	0.246*	0.144*	0.042	0.184	0.374	0.414	0.46	0.26	-0.012*
		89	0.246*	0.144*	0.042	0.184	0.474	0.414	0.46	0.26	-0.012*
		89.1	0.246*	0.144*	0.042	0.184	0.474	0.414	0.46	0.26	-0.012*
		89.2	0.146*	0.144*	-0.058	0.184	0.474	0.414	0.36	0.16	-0.012*
		89.3	0.246*	0.244*	-0.058	0.284	0.474	0.414	0.36	0.26	-0.012*
		89.4	0.246*	0.144*	-0.158	0.184	0.474	0.314	0.36	0.26	-0.112*
		89.5	0.346*	0.144*	-0.058	0.084	0.474	0.314	0.36	0.16	-0.112*
		89.6	0.246*	0.044*	-0.058	0.084	0.474	0.414	0.46	0.26	-0.112*
		89.7	0.246*	0.044*	-0.058	0.084	0.474	0.414	0.46	0.26	-0.112*
		89.8	0.246*	0.044*	-0.058	0.084	0.474	0.414	0.46	0.26	-0.012*
		89.9	0.246*	0.044*	-0.058	0.084	0.474	0.414	0.46	0.26	-0.112*
		90	0.246*	0.144*	-0.058	0.184	0.374	0.314	0.36	0.16	-0.112*
		90.1	0.246*	0.144*	-0.158	0.184	0.474	0.314	0.36	0.16	-0.112*
		90.2	0.346*	0.244*	-0.158	0.184	0.374	0.314	0.26	0.26	-0.112*
		90.3	0.346*	0.244*	-0.058	0.284	0.374	0.314	0.26	0.26	-0.012*
		90.4	0.346*	0.244*	-0.058	0.184	0.374	0.214	0.26	0.26	-0.012*
		90.5	0.346*	0.244*	-0.058	0.084	0.474	0.414	0.36	0.26	-0.012*
		90.6	0.246*	0.144*	-0.058	0.084	0.474	0.414	0.36	0.26	-0.012*
		90.7	0.246*	0.044*	-0.058	0.084	0.474	0.414	0.46	0.36	-0.012*
		90.8	0.246*	0.044*	-0.058	0.084	0.474	0.414	0.46	0.36	-0.012*
		90.9	0.246*	0.144*	-0.058	0.184	0.374	0.314	0.46	0.36	-0.012*
		91	0.346*	0.144*	-0.058	0.184	0.474	0.314	0.46	0.36	-0.112*
		91.1	0.346*	0.244*	-0.058	0.184	0.474	0.314	0.36	0.26	-0.112*
		91.2	0.346*	0.244*	-0.058	0.184	0.474	0.314	0.36	0.26	-0.212*
		91.3	0.346*	0.244*	-0.058	0.184	0.374	0.314	0.36	0.26	-0.212*
		91.4	0.246*	0.144*	-0.058	0.184	0.374	0.314	0.36	0.26	-0.212*
		91.5	0.246*	0.144*	-0.058	0.184	0.374	0.314	0.36	0.26	-0.212*
		91.6	0.246*	0.144*	-0.058	0.084	0.374	0.314	0.36	0.26	-0.112*
		91.7	0.246*	0.144*	-0.058	0.084	0.374	0.214	0.36	0.26	-0.112*
		91.8	0.246*	0.144*	-0.058	0.084	0.374	0.214	0.36	0.26	-0.012*
		91.9	0.246*	0.044*	0.042	0.184	0.474	0.314	0.36	0.36	-0.012*
		92	0.246*	0.044*	0.042	0.284	0.474	0.314	0.26	0.36	-0.012*
		92.1	0.246*	0.044*	-0.058	0.184	0.474	0.314	0.16	0.26	-0.012*
		92.2	0.346*	0.044*	-0.058	0.184	0.374	0.214	0.16	0.26	-0.012*
		92.3	0.346*	0.044*	-0.058	0.184	0.374	0.214	0.16	0.26	-0.012*
		92.4	0.246*	0.144*	-0.058	0.184	0.274	0.214	0.16	0.26	-0.012*
		92.5	0.246*	0.144*	-0.058	0.184	0.274	0.214	0.16	0.16	-0.112*
		92.6	0.246*	0.144*	-0.058	0.184	0.374	0.314	0.26	0.26	-0.112*
		92.7	0.246*	0.144*	-0.058	0.184	0.374	0.314	0.26	0.26	-0.112*
		92.8	0.246*	0.144*	-0.058	0.184	0.374	0.314	0.26	0.26	-0.112*
		92.9	0.246*	0.144*	-0.058	0.184	0.374	0.314	0.26	0.26	-0.112*
		93	0.146*	0.044*	-0.058	0.084	0.374	0.314	0.26	0.36	-0.112*
		93.1	0.146*	0.044*	-0.058	0.084	0.374	0.314	0.26	0.36	-0.112*
		93.2	0.146*	0.044*	-0.058	0.084	0.374	0.414	0.36	0.36	-0.212*
		93.3	0.146*	0.044*	-0.058	0.084	0.274	0.314	0.16	0.26	-0.212*
		93.4	0.246*	0.044*	-0.058	0.084	0.274	0.214	0.16	0.26	-0.212*
		93.5	0.246*	0.044*	-0.058	0.084	0.274	0.214	0.16	0.26	-0.212*
		93.6	0.246*	0.044*	-0.058	0.084	0.274	0.214	0.16	0.26	-0.112*
		93.7	0.246*	0.144*	-0.058	0.084	0.274	0.214	0.16	0.26	-0.212*
		93.8	0.146*	0.144*	-0.058	0.084	0.274	0.214	0.16	0.26	-0.212*
		93.9	0.146*	0.044*	0.042	0.284	0.274	0.214	0.16	0.26	-0.212*
		94	0.146*	0.044*	0.042	0.284	0.274	0.214	0.16	0.36	-0.112*
		94.1	0.146*	0.044*	0.042	0.284	0.274	0.214	0.16	0.36	-0.112*
		94.2	0.046*	-0.056*	0.042	0.284	0.274	0.214	0.26	0.46	-0.112*
		94.3	0.146*	0.044*	-0.058	0.184	0.274	0.214	0.26	0.46	-0.112*
		94.4	0.146*	0.044*	0.042	0.184	0.274	0.214	0.26	0.46	-0.112*
		94.5	0.246*	0.044*	0.042	0.184	0.274	0.314	0.26	0.46	-0.112*
		94.6	0.246*	0.144*	0.042	0.184	0.274	0.314	0.26	0.36	-0.112*
		94.7	0.246*	0.144*	0.042	0.184	0.274	0.314	0.26	0.36	-0.212*
		94.8	0.246*	0.144*	0.042	0.184	0.274	0.314	0.26	0.36	-0.212*
		94.9	0.246*	0.144*	0.042	0.084	0.174	0.214	0.26	0.36	-0.312*
		95	0.246*	0.144*	0.042	0.184	0.174	0.214	0.16	0.26	-0.312*
		95.1	0.246*	0.144*	0.042	0.184	0.174	0.114	0.26	0.26	-0.312*
		95.2	0.246*	0.144*	0.042	0.184	0.174	0.114	0.26	0.26	-0.212*
		95.3	0.146*	0.144*	-0.058	0.084	0.274	0.214	0.26	0.26	-0.212*
		95.4	0.146*	0.144*	-0.058	0.084	0.274	0.214	0.16	0.36	-0.212*
		95.5	0.146*	0.044*	-0.058	0.184	0.274	0.214	0.16	0.36	-0.212*
		95.6	0.146*	-0.056*	-0.058	0.184	0.174	0.214	0.16	0.36	-0.212*
		95.7	0.146*	0.044*	-0.058	0.184	0.174	0.214	0.16	0.36	-0.212*
		95.8	0.146*	0.044*	-0.058	0.184	0.274	0.214	0.16	0.36	-0.212*
		95.9	0.146*	0.044*	-0.058	0.184	0.274	0.214	0.16	0.36	-0.212*
		96	0.146*	0.044*	-0.058	0.184	0.274	0.214	0.16	0.36	-0.312*
		96.1	0.146*	0.044*	-0.058	0.084	0.274	0.314	0.16	0.36	-0.312*
		96.2	0.246*	0.144*	-0.058	0.084	0.274	0.314	0.16	0.26	-0.212*
		96.3	0.246*	0.144*	-0.058	0.084	0.274	0.314	0.16	0.26	-0.212*
		96.4	0.246*	0.144*	-0.058	0.084	0.274	0.314	0.16	0.26	-0.312*
		96.5	0.146*	0.144*	-0.058	0.084	0.274	0.314	0.16	0.26	-0.212*
		96.6	0.146*	0.144*	-0.058	0.084	0.274	0.314	0.26	0.26	-0.212*
		96.7	0.146*	0.144*	0.042	0.084	0.174	0.214	0.26	0.26	-0.212*
		96.8	0.246*	0.144*	0.142	0.284	0.174	0.214	0.26	0.26	-0.212*
		96.9	0.246*	0.144*	0.042	0.184	0.174	0.214	0.16	0.26	-0.212*
		97	0.246*	0.144*	0.042	0.184	0.174	0.214	0.16	0.26	-0.212*
		97.1	0.246*	0.144*	-0.058	0.184	0.174	0.314	0.16	0.36	-0.212*
		97.2	0.246*	0.144*	-0.058	0.184	0.274	0.314	0.16	0.36	-0.212*
		97.3	0.246*	0.144*	-0.058	0.184	0.274	0.214	0.16	0.36	-0.212*
		97.4	0.146*	0.044*	-0.058	0.184	0.274	0.214	0.26	0.36	-0.212*
		97.5	0.146*	0.044*	-0.058	0.184	0.274	0.214	0.26	0.36	-0.212*
		97.6	0.146*	0.044*	-0.058	0.184	0.274	0.214	0.26	0.36	-0.312*
		97.7	0.146*	0.044*	-0.058	0.184	0.274	0.214	0.26	0.36	-0.312*
		97.8	0.146*	0.044*	-0.058	0.184	0.274	0.214	0.26	0.36	-0.312*
		97.9	0.046*	0.044*	-0.058	0.184	0.174	0.214	0.26	0.36	-0.312*
		98	0.146*	0.144*	-0.058	0.084	0.174	0.214	0.16	0.26	-0.312*
		98.1	0.146*	0.144*	-0.058	0.084	0.174	0.214	0.26	0.36	-0.312*
		98.2	0.146*	0.144*	-0.058	0.084	0.174	0.214	0.16	0.36	-0.312*
		98.3	0.146*	0.144*	0.042	0.184	0.174	0.214	0.16	0.36	-0.312*
		98.4	0.246*	0.144*	0.042	0.184	0.174	0.214	0.16	0.46	-0.212*
		98.5	0.246*	0.144*	0.042	0.184	0.174	0.214	0.26	0.46	-0.212*
		98.6	0.246*	0.144*	0.042	0.184	0.174	0.214	0.26	0.46	-0.212*
		98.7	0.146*	0.144*	0.042	0.184	0.174	0.214	0.26	0.36	-0.212*
		98.8	0.146*	0.144*	-0.058	0.184	0.174	0.214	0.26	0.36	-0.212*
		98.9	0.146*	0.144*	-0.158	0.084	0.174	0.214	0.26	0.36	-0.312*
		99	0.146*	0.144*	-0.158	0.084	0.174	0.314	0.26	0.36	-0.312*
		99.1	0.046*	0.044*	-0.158	0.084	0.274	0.314	0.26	0.36	-0.312*
		99.2	0.046*	0.044*	-0.158	0.084	0.274	0.214	0.26	0.36	-0.312*
		99.3	0.046*	0.044*	-0.158	0.084	0.274	0.214	0.16	0.26	-0.312*
		99.4	0.146*	0.044*	-0.158	0.084	0.274	0.214	0.16	0.26	-0.312*
		99.5	0.146*	0.144*	-0.158	0.084	0.274	0.214	0.26	0.26	-0.312*
		99.6	0.146*	0.144*	-0.058	0.184	0.274	0.214	0.26	0.26	-0.212*
		99.7	0.146*	0.144*	0.042	0.184	0.274	0.214	0.16	0.26	-0.212*
		99.8	0.146*	0.144*	0.042	0.184	0.274	0.214	0.16	0.26	-0.212*
		99.9	0.146*	0.144*	0.042	0.184	0.274	0.214	0.16	0.26	-0.212*
		100	0.146*	0.144*	0.042	0.284	0.174	0.114	0.16	0.36	-0.212*
		100.1	0.046*	0.144*	0.042	0.184	0.174	0.114	0.26	0.36	-0.212*
		100.2	0.046*	0.144*	-0.058	0.084	0.274	0.214	0.26	0.36	-0.212*
		100.3	0.146*	0.244*	-0.058	0.084	0.274	0.214	0.26	0.36	-0.212*
		100.4	0.146*	0.244*	-0.058	0.084	0.274	0.214	0.26	0.36	-0.212*
		100.5	0.046*	0.144*	-0.058	0.084	0.274	0.214	0.26	0.36	-0.312*
		100.6	0.046*	0.144*	-0.058	0.084	0.274	0.314	0.26	0.36	-0.312*
		100.7	0.046*	0.144*	-0.058	0.084	0.274	0.314	0.16	0.26	-0.312*
		100.8	0.046*	0.144*	0.042	0.084	0.274	0.314	0.26	0.26	-0.312*
		100.9	0.046*	0.144*	-0.058	0.084	0.274	0.314	0.16	0.26	-0.212*
		101	0.046*	0.144*	-0.058	0.084	0.274	0.314	0.16	0.26	-0.212*
		101.1	0.046*	0.144*	-0.058	0.084	0.274	0.314	0.16	0.26	-0.212*
		101.2	0.046*	0.144*	-0.058	0.084	0.174	0.214	0.16	0.16	-0.212*
		101.3	0.046*	0.144*	-0.058	0.084	0.174	0.214	0.16	0.26	-0.212*
		101.4	0.046*	0.144*	-0.158	-0.016	0.174	0.214	0.16	0.26	-0.212*
		101.5	0.146*	0.144*	-0.158	-0.016	0.174	0.114	0.16	0.26	-0.212*
		101.6	0.146*	0.144*	-0.158	-0.016	0.174	0.114	0.26	0.36	-0.212*
		101.7	0.146*	0.144*	-0.158	-0.016	0.174	0.114	0.26	0.36	-0.212*
		101.8	0.146*	0.144*	-0.058	-0.016	0.174	0.114	0.26	0.36	-0.212*
		101.9	0.146*	0.144*	-0.058	0.084	0.174	0.114	0.16	0.26	-0.212*
		102	0.146*	0.144*	-0.058	0.084	0.174	0.114	0.26	0.26	-0.212*
		102.1	0.246*	0.244*	0.042	0.184	0.174	0.214	0.26	0.26	-0.212*
		102.2	0.246*	0.244*	0.042	0.184	0.174	0.214	0.26	0.16	-0.212*
		102.3	0.146*	0.244*	0.042	0.184	0.174	0.214	0.26	0.16	-0.212*
		102.4	0.146*	0.244*	0.042	0.184	0.174	0.214	0.26	0.16	-0.212*
		102.5	0.046*	0.244*	0.042	0.184	0.274	0.214	0.16	0.16	-0.312*
		102.6	0.046*	0.244*	0.042	0.184	0.274	0.214	0.16	0.16	-0.212*
		102.7	0.046*	0.244*	0.042	0.184	0.274	0.214	0.16	0.16	-0.112*
		102.8	0.046*	0.244*	-0.058	0.184	0.374	0.314	0.16	0.26	-0.112*
		102.9	0.046*	0.244*	0.042	0.184	0.274	0.214	0.16	0.26	-0.112*
		103	0.046*	0.244*	-0.058	0.084	0.274	0.214	0.16	0.26	-0.112*
		103.1	0.046*	0.244*	-0.058	0.084	0.274	0.114	0.06	0.16	-0.112*
		103.2	0.046*	0.244*	-0.058	0.184	0.274	0.114	0.06	0.16	-0.112*
		103.3	0.046*	0.244*	-0.058	0.184	0.274	0.114	0.06	0.06	-0.112*
		103.4	0.246*	0.344*	-0.058	0.184	0.274	0.114	0.16	0.16	-0.112*
		103.5	0.246*	0.344*	-0.058	0.184	0.274	0.114	0.16	0.16	-0.212*
		103.6	0.146*	0.244*	-0.058	0.084	0.274	0.114	0.26	0.16	-0.212*
		103.7	0.146*	0.244*	-0.058	0.084	0.274	0.214	0.26	0.16	-0.212*
		103.8	0.146*	0.244*	-0.058	0.084	0.174	0.214	0.26	0.16	-0.212*
		103.9	0.146*	0.344*	-0.058	0.084	0.174	0.214	0.26	0.16	-0.212*
		104	0.146*	0.344*	-0.058	0.084	0.174	0.214	0.26	0.16	-0.212*
		104.1	0.146*	0.344*	-0.058	0.084	0.174	0.214	0.26	0.16	-0.112*
		104.2	0.146*	0.344*	0.042	0.084	0.074	0.114	0.26	0.16	-0.112*
		104.3	0.146*	0.344*	0.042	0.084	0.074	0.114	0.26	0.16	-0.112*
		104.4	0.146*	0.344*	0.042	0.084	0.074	0.114	0.26	0.16	-0.112*
		104.5	0.046*	0.244*	0.042	0.084	0.074	0.114	0.26	0.16	-0.212*
		104.6	0.046*	0.244*	0.042	0.184	0.074	0.014	0.26	0.16	-0.212*
		104.7	0.046*	0.244*	0.042	0.184	0.074	0.014	0.26	0.16	-0.212*
		104.8	0.046*	0.244*	0.042	0.184	0.074	0.014	0.16	0.06	-0.212*
		104.9	0.046*	0.244*	0.042	0.184	0.074	0.114	0.06	0.06	-0.212*
		105	0.146*	0.244*	0.042	0.184	0.074	0.114	0.06	0.06	-0.212*
		105.1	0.146*	0.244*	0.042	0.184	0.074	0.114	0.06	0.06	-0.112*
		105.2	0.046*	0.144*	0.042	0.184	0.074	0.114	0.06	0.06	-0.112*
		105.3	0.046*	0.144*	0.042	0.184	0.074	0.114	0.06	0.06	-0.112*
		105.4	0.046*	0.244*	0.142	0.184	0.074	0.114	0.06	0.06	-0.112*
		105.5	0.046*	0.244*	0.142	0.084	0.174	0.114	0.06	0.06	-0.112*
		105.6	0.046*	0.244*	0.042	0.084	0.174	0.114	0.16	0.16	-0.212*
		105.7	0.046*	0.244*	0.042	0.084	0.174	0.114	0.16	0.16	-0.212*
		105.8	0.046*	0.244*	0.042	0.084	0.274	0.214	0.16	0.16	-0.212*
		105.9	0.046*	0.244*	-0.058	0.084	0.174	0.114	0.16	0.16	-0.212*
		106	0.046*	0.244*	-0.058	0.084	0.174	0.014	0.16	0.16	-0.212*
		106.1	0.246*	0.344*	-0.058	0.084	0.174	0.014	0.16	0.16	-0.212*
		106.2	0.146*	0.344*	-0.058	0.084	0.174	0.014	0.16	0.16	-0.212*
		106.3	0.146*	0.344*	0.042	0.184	0.074	0.014	0.16	0.16	-0.212*
		106.4	0.146*	0.344*	0.042	0.184	0.074	0.014	0.16	0.16	-0.312*
		106.5	0.146*	0.344*	0.042	0.084	0.074	0.114	0.16	0.16	-0.212*
		106.6	0.146*	0.344*	0.042	0.084	0.074	0.114	0.16	0.16	-0.212*
		106.7	0.146*	0.244*	0.042	0.084	0.074	0.114	0.16	0.16	-0.112*
		106.8	0.046*	0.244*	0.042	0.084	0.074	0.114	0.16	0.16	-0.112*
		106.9	0.046*	0.244*	0.042	0.084	0.074	0.114	0.16	0.16	-0.112*
		107	0.046*	0.244*	0.142	0.084	0.074	0.114	0.06	0.06	-0.112*
		107.1	0.046*	0.244*	0.042	0.184	0.074	0.114	0.06	0.06	-0.112*
		107.2	0.046*	0.244*	0.042	0.184	0.074	0.114	0.06	0.16	-0.112*
		107.3	0.046*	0.244*	0.042	0.184	0.074	0.114	0.06	0.16	-0.212*
		107.4	0.046*	0.244*	0.042	0.184	-0.026	0.014	0.06	0.16	-0.212*
		107.5	0.046*	0.244*	0.042	0.184	-0.026	0.014	0.06	0.16	-0.212*
		107.6	0.046*	0.244*	0.042	0.184	-0.026	0.014	0.06	0.16	-0.212*
		107.7	0.146*	0.344*	0.042	0.184	-0.026	0.014	0.06	0.16	-0.212*
		107.8	0.146*	0.344*	-0.058	0.084	0.074	0.114	0.06	0.16	-0.212*
		107.9	0.146*	0.344*	-0.058	0.084	0.174	0.114	0.06	0.16	-0.212*
		108	0.146*	0.244*	-0.058	-0.016	0.074	0.114	0.06	0.16	-0.212*
		108.1	0.146*	0.244*	-0.058	-0.016	0.074	0.114	0.06	0.16	-0.212*
		108.2	0.146*	0.244*	-0.158	-0.016	0.074	0.114	0.06	0.16	-0.112*
		108.3	0.046*	0.144*	-0.158	-0.016	0.074	0.114	0.16	0.26	-0.012*
		108.4	0.146*	0.244*	-0.058	-0.016	0.074	0.114	0.16	0.26	-0.012*
		108.5	0.146*	0.244*	0.042	0.084	0.074	0.114	0.16	0.26	-0.012*
		108.6	0.146*	0.244*	0.042	0.084	0.074	0.214	0.06	0.16	-0.012*
		108.7	0.046*	0.244*	0.042	0.084	0.074	0.214	0.06	0.16	-0.012*
		108.8	0.046*	0.244*	0.042	0.184	0.074	0.214	0.06	0.16	-0.012*
		108.9	0.046*	0.244*	0.042	0.184	0.074	0.214	0.06	0.16	-0.012*
		109	0.046*	0.244*	0.042	0.184	0.074	0.214	0.06	0.16	-0.012*
		109.1	0.046*	0.244*	0.042	0.184	0.074	0.214	0.06	0.16	-0.012*
		109.2	0.046*	0.344*	0.042	0.184	0.074	0.114	0.06	0.16	-0.112*
		109.3	0.046*	0.344*	-0.058	0.084	0.074	0.114	0.16	0.16	-0.112*
		109.4	0.046*	0.344*	-0.058	0.084	-0.126	0.014	0.16	0.16	-0.112*
		109.5	0.046*	0.344*	-0.058	0.084	-0.026	0.114	0.16	0.16	-0.112*
		109.6	0.046*	0.344*	-0.058	0.084	-0.026	0.114	0.06	0.26	-0.112*
		109.7	0.046*	0.344*	-0.058	0.084	-0.026	0.114	0.06	0.26	-0.012*
		109.8	0.046*	0.344*	-0.058	-0.016	-0.026	0.114	0.06	0.26	-0.012*
		109.9	0.046*	0.344*	-0.058	-0.016	-0.026	0.114	0.06	0.26	-0.012*
		110	0.046*	0.244*	-0.058	-0.016	0.074	0.114	0.06	0.26	-0.012*
		110.1	0.046*	0.244*	0.042	-0.016	0.074	0.114	0.06	0.26	-0.012*
		110.2	0.046*	0.244*	0.042	-0.016	0.074	0.114	0.16	0.36	-0.012*
		110.3	0.046*	0.144*	0.042	-0.016	0.074	0.114	0.16	0.36	-0.012*
		110.4	0.046*	0.144*	0.042	-0.016	0.074	0.114	0.16	0.36	-0.012*
		110.5	0.046*	0.144*	0.042	-0.016	0.074	0.214	0.16	0.26	-0.012*
		110.6	0.046*	0.144*	0.042	-0.016	0.074	0.214	0.16	0.26	-0.012*
		110.7	0.046*	0.144*	0.042	0.084	0.074	0.214	0.16	0.26	-0.012*
		110.8	0.146*	0.244*	0.042	0.084	0.074	0.214	0.16	0.26	-0.012*
		110.9	0.146*	0.244*	0.042	0.084	0.074	0.214	0.16	0.26	-0.112*
		111	0.146*	0.244*	0.042	0.084	0.074	0.214	0.26	0.26	-0.112*
		111.1	0.146*	0.344*	0.042	0.084	0.074	0.214	0.26	0.26	-0.112*
		111.2	0.046*	0.244*	0.142	0.184	0.274	0.314	0.26	0.26	-0.112*
		111.3	0.046*	0.244*	0.042	0.184	0.174	0.214	0.26	0.36	-0.112*
		111.4	-0.054*	0.244*	0.042	0.184	0.174	0.214	0.26	0.36	-0.112*
		111.5	-0.054*	0.244*	0.042	0.184	0.174	0.114	0.16	0.26	-0.012*
		111.6	-0.054*	0.244*	0.042	0.184	0.174	0.114	0.16	0.26	-0.012*
		111.7	-0.054*	0.244*	0.042	0.184	0.174	0.114	0.16	0.16	-0.012*
		111.8	-0.054*	0.244*	0.042	0.184	0.174	0.114	0.16	0.16	-0.012*
		111.9	-0.054*	0.244*	0.042	0.184	0.174	0.114	0.16	0.16	-0.012*
		112	0.046*	0.244*	0.142	0.184	0.074	0.114	0.16	0.16	-0.012*
		112.1	0.046*	0.244*	0.042	0.084	0.074	0.114	0.16	0.16	-0.112*
		112.2	0.046*	0.244*	0.042	0.084	0.074	0.114	0.06	0.16	-0.112*
		112.3	0.046*	0.244*	0.042	0.084	0.074	0.114	0.16	0.16	-0.212*
		112.4	0.046*	0.244*	0.042	0.084	0.074	0.114	0.16	0.16	-0.212*
		112.5	0.046*	0.244*	0.042	0.084	0.074	0.114	0.16	0.16	-0.212*
		112.6	0.046*	0.244*	0.042	0.084	0.074	0.114	0.16	0.16	-0.212*
		112.7	-0.054*	0.244*	0.042	0.184	0.074	0.114	0.16	0.16	-0.212*
		112.8	-0.054*	0.144*	0.042	0.184	0.074	0.114	0.16	0.06	-0.212*
		112.9	-0.054*	0.144*	0.042	0.184	0.174	0.114	0.16	0.06	-0.212*
		113	-0.054*	0.144*	0.042	0.184	0.174	0.114	0.16	0.06	-0.212*
		113.1	-0.054*	0.144*	0.042	0.184	0.174	0.114	0.16	0.16	-0.212*
		113.2	-0.054*	0.144*	0.042	0.184	0.274	0.214	0.16	0.16	-0.112*
		113.3	0.046*	0.144*	0.042	0.184	0.274	0.214	0.16	0.16	-0.112*
		113.4	-0.054*	0.144*	0.042	0.184	0.274	0.214	0.26	0.26	-0.112*
		113.5	-0.054*	0.144*	0.142	0.184	0.274	0.214	0.26	0.26	-0.112*
		113.6	-0.054*	0.144*	0.042	0.184	0.174	0.114	0.26	0.26	-0.112*
		113.7	-0.154*	0.144*	0.142	0.284	0.174	0.114	0.26	0.26	-0.112*
		113.8	-0.154*	0.144*	0.142	0.184	0.174	0.114	0.26	0.26	-0.212*
		113.9	-0.154*	0.144*	0.142	0.184	0.174	0.114	0.26	0.26	-0.212*
		114	-0.054*	0.244*	0.142	0.184	0.074	0.114	0.16	0.16	-0.312*
		114.1	-0.054*	0.244*	0.142	0.184	0.074	0.114	0.16	0.16	-0.312*
		114.2	-0.054*	0.244*	0.142	0.184	0.074	0.114	0.16	0.16	-0.312*
		114.3	0.046*	0.244*	0.142	0.184	0.074	0.114	0.26	0.16	-0.212*
		114.4	0.046*	0.244*	0.142	0.184	0.074	0.114	0.26	0.16	-0.212*
		114.5	0.046*	0.244*	0.142	0.184	0.074	0.114	0.16	0.16	-0.212*
		114.6	0.046*	0.244*	0.042	0.084	0.074	0.014	0.16	0.16	-0.212*
		114.7	0.046*	0.144*	0.042	0.084	0.074	0.014	0.16	0.16	-0.212*
		114.8	0.046*	0.244*	0.042	0.084	0.074	0.014	0.16	0.16	-0.212*
		114.9	0.046*	0.244*	0.042	0.084	0.174	0.114	0.16	0.16	-0.112*
		115	0.046*	0.244*	0.042	0.184	0.174	0.014	0.16	0.16	-0.112*
		115.1	0.046*	0.244*	0.042	0.184	0.174	0.014	0.16	0.16	-0.212*
		115.2	0.046*	0.244*	0.042	0.184	0.174	0.014	0.16	0.16	-0.212*
		115.3	-0.154*	0.144*	0.042	0.184	0.174	0.014	0.16	0.16	-0.212*
		115.4	-0.154*	0.144*	0.042	0.184	0.174	0.114	0.16	0.16	-0.312*
		115.5	-0.054*	0.144*	0.042	0.184	0.174	0.114	0.16	0.16	-0.312*
		115.6	-0.054*	0.144*	0.042	0.184	0.174	0.114	0.26	0.26	-0.312*
		115.7	-0.054*	0.144*	0.142	0.184	0.174	0.114	0.26	0.26	-0.212*
		115.8	-0.054*	0.144*	0.042	0.184	0.174	0.114	0.16	0.06	-0.212*
		115.9	-0.054*	0.144*	0.042	0.184	0.174	0.114	0.26	0.06	-0.212*
		116	-0.054*	0.144*	0.042	0.184	0.174	0.114	0.26	0.16	-0.212*
		116.1	-0.054*	0.244*	0.042	0.184	0.174	0.114	0.26	0.16	-0.212*
		116.2	0.046*	0.344*	0.042	0.084	0.174	0.114	0.26	0.16	-0.212*
		116.3	0.046*	0.344*	0.042	0.084	0.174	0.114	0.26	0.16	-0.212*
		116.4	0.146*	0.344*	0.042	0.184	0.074	0.014	0.16	0.16	-0.312*
		116.5	0.146*	0.244*	-0.058	0.084	0.074	0.014	0.16	0.16	-0.312*
		116.6	0.146*	0.244*	-0.058	0.084	0.074	0.014	0.16	0.16	-0.312*
		116.7	0.146*	0.244*	-0.058	0.084	0.074	0.014	0.16	0.16	-0.312*
		116.8	0.046*	0.144*	-0.058	0.084	0.074	0.014	0.16	0.16	-0.312*
		116.9	0.046*	0.144*	-0.058	0.084	0.074	0.014	0.16	0.16	-0.312*
		117	0.046*	0.144*	-0.058	0.084	0.074	0.114	0.16	0.16	-0.312*
		117.1	0.046*	0.144*	-0.058	0.084	0.074	0.114	0.16	0.16	-0.312*
		117.2	-0.054*	0.144*	-0.058	0.084	0.074	0.114	0.16	0.16	-0.312*
		117.3	-0.054*	0.144*	-0.058	0.084	0.174	0.114	0.16	0.16	-0.312*
		117.4	-0.054*	0.144*	-0.058	0.084	0.074	0.014	0.16	0.06	-0.212*
		117.5	-0.054*	0.144*	-0.058	0.084	0.074	0.014	0.16	0.16	-0.212*
		117.6	-0.054*	0.144*	0.042	0.184	0.074	0.014	0.16	0.16	-0.212*
		117.7	0.046*	0.244*	0.042	0.184	0.074	0.014	0.16	0.16	-0.212*
		117.8	0.046*	0.244*	0.042	0.184	0.074	0.014	0.26	0.26	-0.212*
		117.9	0.146*	0.244*	0.042	0.184	0.074	0.014	0.26	0.16	-0.212*
		118	0.146*	0.244*	0.042	0.184	0.074	0.014	0.26	0.16	-0.312*
		118.1	0.146*	0.344*	0.042	0.184	0.074	0.014	0.26	0.16	-0.312*
		118.2	0.046*	0.244*	0.142	0.284	0.074	0.014	0.26	0.16	-0.312*
		118.3	0.046*	0.144*	0.142	0.284	0.174	0.114	0.26	0.16	-0.312*
		118.4	0.046*	0.144*	0.142	0.184	0.174	0.114	0.26	0.16	-0.212*
		118.5	0.046*	0.144*	0.042	0.084	0.174	0.114	0.26	0.16	-0.212*
		118.6	0.046*	0.144*	0.042	0.084	0.174	0.114	0.16	0.16	-0.212*
		118.7	0.046*	0.144*	0.042	0.084	0.174	0.114	0.16	0.16	-0.312*
		118.8	0.146*	0.244*	-0.058	0.084	0.174	0.114	0.06	0.06	-0.312*
		118.9	0.146*	0.244*	-0.058	0.084	0.174	0.114	0.06	0.06	-0.312*
		119	0.146*	0.244*	-0.058	0.084	0.174	0.114	0.16	0.06	-0.312*
		119.1	0.146*	0.244*	-0.058	0.084	0.074	0.114	0.16	0.16	-0.312*
		119.2	0.046*	0.244*	-0.058	0.084	0.074	0.214	0.16	0.16	-0.312*
		119.3	0.146*	0.244*	0.042	0.284	0.074	0.214	0.16	0.16	-0.312*
		119.4	0.146*	0.244*	0.042	0.284	0.074	0.214	0.16	0.16	-0.312*
		119.5	0.046*	0.144*	0.042	0.284	-0.026	0.114	0.16	0.16	-0.312*
		119.6	0.046*	0.144*	0.042	0.284	-0.026	0.114	0.16	0.16	-0.312*
		119.7	0.046*	0.144*	0.042	0.284	-0.026	0.014	0.16	0.16	-0.312*
		119.8	0.046*	0.244*	0.042	0.284	-0.026	0.014	0.16	0.16	-0.312*
		119.9	0.046*	0.244*	0.042	0.284	-0.026	0.014	0.16	0.16	-0.312*
		120	0.046*	0.244*	0.042	0.284	-0.026	0.014	0.16	0.16	-0.212*
		120.1	0.046*	0.244*	0.042	0.284	-0.026	0.014	0.26	0.26	-0.212*
		120.2	0.046*	0.144*	0.042	0.284	-0.026	0.014	0.26	0.26	-0.212*
		120.3	0.046*	0.144*	-0.058	0.084	0.074	0.014	0.16	0.16	-0.312*
		120.4	0.046*	0.144*	-0.058	0.084	0.074	0.014	0.16	0.16	-0.312*
		120.5	0.046*	0.144*	-0.058	0.084	0.074	0.014	0.16	0.16	-0.312*
		120.6	0.046*	0.144*	-0.058	0.084	0.074	0.014	0.26	0.16	-0.312*
		120.7	0.046*	0.144*	0.042	0.284	0.074	0.114	0.26	0.06	-0.312*
		120.8	0.046*	0.144*	0.042	0.284	0.074	0.114	0.26	0.16	-0.312*
		120.9	0.046*	0.144*	0.042	0.284	0.074	0.114	0.26	0.16	-0.312*
		121	-0.054*	0.044*	0.042	0.284	0.074	0.114	0.26	0.16	-0.412*
		121.1	-0.054*	0.044*	-0.058	0.284	0.074	0.114	0.26	0.16	-0.412*
		121.2	-0.054*	0.044*	0.042	0.284	0.074	0.114	0.26	0.16	-0.412*
		121.3	-0.054*	0.044*	0.042	0.284	0.074	0.114	0.26	0.16	-0.412*
		121.4	-0.054*	0.044*	0.042	0.284	0.074	0.114	0.16	0.16	-0.312*
		121.5	-0.054*	0.044*	0.042	0.284	0.074	0.114	0.16	0.16	-0.312*
		121.6	-0.054*	0.044*	0.042	0.284	0.074	0.114	0.16	0.16	-0.312*
		121.7	-0.054*	0.144*	0.042	0.284	0.074	0.114	0.16	0.16	-0.212*
		121.8	-0.054*	0.144*	0.042	0.284	0.074	0.114	0.16	0.16	-0.212*
		121.9	-0.054*	0.044*	0.042	0.284	0.074	0.114	0.06	0.06	-0.212*
		122	0.046*	0.144*	0.042	0.284	0.074	0.114	0.06	0.06	-0.212*
		122.1	0.046*	0.144*	0.042	0.384	-0.026	0.014	0.06	0.16	-0.212*
		122.2	0.046*	0.144*	-0.058	0.184	-0.026	0.014	0.06	0.16	-0.212*
		122.3	0.046*	0.144*	-0.058	0.184	-0.026	0.014	0.06	0.16	-0.212*
		122.4	0.046*	0.144*	-0.058	0.184	-0.026	0.014	0.16	0.16	-0.212*
		122.5	0.046*	0.144*	-0.058	0.184	0.074	0.014	0.16	0.16	-0.312*
		122.6	0.046*	0.144*	-0.058	0.184	0.074	0.014	0.16	0.16	-0.312*
		122.7	0.046*	0.144*	-0.058	0.184	0.074	0.114	0.16	0.16	-0.312*
		122.8	-0.054*	0.044*	-0.058	0.184	0.074	0.114	0.16	0.16	-0.312*
		122.9	0.046*	0.144*	0.042	0.184	0.074	0.114	0.16	0.16	-0.212*
		123	0.046*	0.144*	0.042	0.184	0.074	0.114	0.16	0.16	-0.112*
		123.1	0.046*	0.244*	0.042	0.184	0.074	0.114	0.16	0.16	-0.112*
		123.2	0.046*	0.244*	0.042	0.184	0.074	0.114	0.16	0.06	-0.112*
		123.3	0.046*	0.144*	0.042	0.184	0.074	0.114	0.26	0.16	-0.112*
		123.4	0.046*	0.144*	0.042	0.184	0.074	0.114	0.26	0.16	-0.212*
		123.5	0.046*	0.144*	0.042	0.184	-0.026	0.114	0.26	0.16	-0.212*
		123.6	0.046*	0.144*	0.042	0.184	-0.026	0.114	0.16	0.16	-0.212*
		123.7	0.046*	0.144*	0.042	0.284	-0.026	0.014	0.16	0.16	-0.212*
		123.8	0.046*	0.144*	-0.058	0.284	-0.026	0.014	0.06	0.16	-0.212*
		123.9	0.046*	0.144*	-0.058	0.284	-0.026	0.014	0.06	0.16	-0.212*
		124	-0.054*	0.044*	-0.058	0.284	0.074	0.114	0.06	0.16	-0.212*
		124.1	-0.054*	0.044*	-0.158	0.184	0.074	0.114	0.06	0.16	-0.212*
		124.2	-0.054*	0.044*	-0.158	0.184	0.074	0.114	0.06	0.16	-0.112*
		124.3	-0.054*	0.044*	-0.158	0.184	0.074	0.114	0.06	0.16	-0.112*
		124.4	-0.054*	0.044*	-0.058	0.284	0.074	0.114	0.06	0.16	-0.112*
		124.5	-0.054*	0.044*	-0.058	0.284	0.074	0.114	0.06	0.16	-0.112*
		124.6	-0.054*	0.044*	0.042	0.284	0.074	0.114	0.06	0.16	-0.112*
		124.7	-0.054*	0.044*	0.042	0.284	0.074	0.114	0.16	0.16	-0.112*
		124.8	-0.054*	0.044*	0.042	0.184	0.074	0.114	0.16	0.16	-0.112*
		124.9	-0.054*	0.144*	0.042	0.184	-0.026	0.014	0.16	0.16	-0.112*
		125	-0.054*	0.144*	0.042	0.184	-0.026	0.014	0.16	0.16	-0.112*
		125.1	-0.154*	0.144*	0.042	0.184	-0.026	0.014	0.16	0.16	-0.112*
		125.2	-0.154*	0.144*	0.042	0.184	-0.026	0.014	0.16	0.16	-0.012*
		125.3	-0.054*	0.144*	0.042	0.184	-0.026	0.014	0.16	0.16	-0.012*
		125.4	-0.054*	0.144*	0.042	0.184	-0.026	0.014	0.16	0.16	-0.012*
		125.5	-0.054*	0.144*	0.042	0.184	-0.026	0.014	0.16	0.26	-0.012*
		125.6	-0.054*	0.144*	0.042	0.184	-0.026	0.014	0.16	0.26	-0.012*
		125.7	-0.054*	0.144*	0.042	0.184	0.074	0.014	0.16	0.26	-0.012*
		125.8	-0.054*	0.144*	0.042	0.184	0.074	0.014	0.16	0.16	-0.012*
		125.9	0.046*	0.244*	-0.058	0.084	0.074	0.114	0.16	0.16	-0.012*
		126	0.046*	0.244*	-0.058	0.084	0.074	0.114	0.16	0.16	0.088*
		126.1	-0.054*	0.144*	-0.058	0.084	0.074	0.114	0.06	0.06	-0.012*
		126.2	-0.054*	0.144*	-0.058	0.184	0.074	0.114	0.06	0.06	-0.012*
		126.3	-0.054*	0.144*	-0.058	0.184	0.074	0.114	0.06	0.06	-0.112*
		126.4	-0.054*	0.144*	-0.058	0.184	0.074	0.114	0.06	0.06	-0.112*
		126.5	-0.054*	0.144*	-0.058	0.184	0.074	0.114	0.06	0.06	-0.112*
		126.6	-0.054*	0.144*	-0.058	0.184	0.174	0.214	0.16	0.06	-0.112*
		126.7	-0.054*	0.244*	-0.058	0.184	0.174	0.214	0.16	0.06	-0.112*
		126.8	-0.054*	0.244*	0.042	0.284	0.074	0.114	0.16	0.06	-0.112*
		126.9	-0.054*	0.244*	0.042	0.284	0.074	0.114	0.16	0.06	-0.112*
		127	-0.054*	0.244*	0.042	0.284	0.074	0.114	0.16	0.06	-0.112*
		127.1	-0.054*	0.244*	0.042	0.184	0.074	0.114	0.16	0.06	-0.112*
		127.2	-0.154*	0.244*	0.042	0.184	-0.026	0.014	0.16	0.06	-0.112*
		127.3	-0.154*	0.244*	0.042	0.184	-0.026	0.014	0.16	0.06	-0.012*
		127.4	-0.054*	0.344*	0.042	0.184	-0.026	0.014	0.26	0.16	-0.012*
		127.5	0.046*	0.344*	0.042	0.184	-0.026	0.014	0.16	0.16	-0.012*
		127.6	-0.054*	0.244*	-0.058	0.084	-0.026	0.014	0.16	0.16	-0.112*
		127.7	-0.054*	0.244*	0.142	0.184	0.074	0.114	0.16	0.26	-0.112*
		127.8	-0.054*	0.244*	0.142	0.184	0.074	0.114	0.16	0.26	-0.112*
		127.9	-0.054*	0.244*	0.142	0.184	0.074	0.114	0.06	0.16	-0.112*
		128	-0.054*	0.244*	0.142	0.184	0.074	0.114	0.06	0.16	-0.112*
		128.1	-0.054*	0.244*	0.142	0.184	0.174	0.214	0.06	0.16	-0.112*
		128.2	-0.054*	0.244*	0.142	0.284	0.174	0.214	0.06	0.16	-0.012*
		128.3	-0.054*	0.244*	0.142	0.284	0.174	0.214	0.06	0.16	-0.012*
		128.4	-0.054*	0.244*	0.142	0.284	0.174	0.214	0.06	0.16	-0.012*
		128.5	-0.054*	0.244*	0.142	0.284	0.174	0.214	0.16	0.16	-0.012*
		128.6	-0.054*	0.344*	0.142	0.284	0.174	0.214	0.16	0.06	-0.012*
		128.7	-0.054*	0.344*	0.142	0.284	0.174	0.214	0.16	0.06	-0.012*
		128.8	-0.054*	0.344*	-0.058	0.184	0.174	0.214	0.16	0.06	-0.012*
		128.9	-0.054*	0.344*	-0.058	0.184	0.074	0.214	0.16	0.06	-0.012*
		129	-0.054*	0.344*	-0.058	0.184	0.074	0.214	0.16	0.06	-0.012*
		129.1	-0.154*	0.244*	0.042	0.184	0.074	0.214	0.16	0.06	-0.012*
		129.2	-0.154*	0.244*	0.042	0.184	0.074	0.114	0.16	0.16	-0.012*
		129.3	-0.054*	0.344*	0.042	0.184	0.074	0.214	0.16	0.16	-0.012*
		129.4	-0.054*	0.344*	0.142	0.184	0.074	0.214	0.26	0.26	-0.012*
		129.5	-0.054*	0.344*	0.142	0.184	0.174	0.314	0.26	0.26	-0.112*
		129.6	0.046*	0.344*	0.142	0.184	0.174	0.314	0.26	0.26	-0.112*
		129.7	-0.054*	0.344*	0.142	0.184	0.174	0.314	0.26	0.26	-0.112*
		129.8	-0.054*	0.344*	0.142	0.184	0.174	0.314	0.26	0.26	-0.112*
		129.9	-0.054*	0.344*	0.142	0.184	0.174	0.314	0.36	0.26	-0.212*
		130	0.046*	0.344*	0.142	0.184	0.174	0.314	0.36	0.26	-0.212*
		130.1	-0.054*	0.244*	0.142	0.184	0.074	0.214	0.16	0.16	-0.112*
		130.2	-0.054*	0.344*	0.042	0.084	0.074	0.214	0.16	0.16	-0.112*
		130.3	-0.054*	0.344*	0.042	0.084	0.074	0.214	0.16	0.16	-0.112*
		130.4	-0.054*	0.344*	0.042	0.184	0.074	0.214	0.16	0.16	-0.112*
		130.5	-0.054*	0.344*	0.042	0.184	0.074	0.214	0.16	0.26	-0.112*
		130.6	-0.054*	0.344*	0.142	0.184	0.174	0.214	0.16	0.26	-0.112*
		130.7	-0.054*	0.344*	0.042	0.184	0.174	0.214	0.16	0.26	-0.112*
		130.8	0.046*	0.444*	0.042	0.184	0.174	0.214	0.16	0.26	-0.112*
		130.9	0.046*	0.444*	0.142	0.284	0.274	0.414	0.16	0.16	-0.112*
		131	0.046*	0.344*	0.142	0.284	0.274	0.314	0.16	0.16	-0.112*
		131.1	0.046*	0.344*	0.142	0.284	0.274	0.314	0.16	0.16	-0.212*
		131.2	-0.054*	0.244*	0.142	0.284	0.174	0.214	0.06	0.16	-0.212*
		131.3	-0.054*	0.244*	0.042	0.084	0.174	0.214	0.06	0.16	-0.212*
		131.4	0.046*	0.244*	0.042	0.084	0.174	0.214	0.06	0.16	-0.212*
		131.5	0.046*	0.244*	0.042	0.084	0.174	0.214	0.06	0.16	-0.212*
		131.6	0.046*	0.244*	0.042	0.084	0.174	0.214	-0.04	0.06	-0.212*
		131.7	0.046*	0.244*	0.042	0.184	0.174	0.214	0.06	0.06	-0.212*
		131.8	0.046*	0.244*	0.042	0.184	0.174	0.214	0.06	0.16	-0.212*
		131.9	0.046*	0.244*	0.042	0.184	0.174	0.214	0.16	0.26	-0.212*
		132	0.046*	0.344*	-0.058	0.184	0.174	0.214	0.16	0.26	-0.112*
		132.1	0.046*	0.344*	-0.058	0.184	0.174	0.214	0.16	0.26	-0.012*
		132.2	0.046*	0.344*	-0.058	0.184	0.174	0.214	0.16	0.26	-0.012*
		132.3	0.046*	0.344*	0.042	0.184	0.174	0.414	0.16	0.16	-0.012*
		132.4	-0.054*	0.344*	-0.058	0.084	0.174	0.214	0.16	0.16	-0.112*
		132.5	-0.054*	0.244*	-0.058	0.084	0.174	0.214	0.16	0.16	-0.112*
		132.6	-0.054*	0.244*	-0.058	-0.016	0.174	0.214	0.16	0.16	-0.112*
		132.7	-0.054*	0.244*	-0.058	-0.016	0.174	0.214	0.16	0.16	-0.112*
		132.8	-0.054*	0.244*	-0.058	-0.016	0.174	0.214	0.16	0.16	-0.112*
		132.9	-0.054*	0.244*	-0.058	-0.016	0.174	0.214	0.16	0.16	-0.112*
		133	-0.054*	0.244*	-0.058	-0.016	0.174	0.214	0.06	0.16	-0.112*
		133.1	-0.054*	0.244*	-0.058	-0.016	0.174	0.214	0.06	0.16	-0.212*
		133.2	0.046*	0.344*	-0.058	-0.016	0.174	0.214	0.06	0.26	-0.212*
		133.3	0.146*	0.444*	-0.058	0.084	0.174	0.214	-0.04	0.16	-0.212*
		133.4	0.046*	0.344*	-0.058	0.084	0.274	0.214	-0.04	0.16	-0.212*
		133.5	0.046*	0.244*	-0.058	0.084	0.174	0.214	-0.04	0.16	-0.212*
		133.6	0.046*	0.244*	-0.058	0.084	0.174	0.214	-0.04	0.16	-0.212*
		133.7	0.046*	0.244*	-0.058	0.084	0.174	0.114	-0.04	0.06	-0.212*
		133.8	0.046*	0.244*	0.042	0.184	0.174	0.114	-0.04	0.06	-0.112*
		133.9	0.046*	0.244*	0.042	0.084	0.174	0.114	-0.04	0.06	-0.112*
		134	0.046*	0.244*	0.042	0.084	0.074	0.014	-0.04	0.06	-0.112*
		134.1	0.046*	0.244*	0.042	0.084	0.074	0.014	-0.04	0.06	-0.112*
		134.2	0.046*	0.244*	0.042	0.084	0.074	0.014	-0.04	0.06	-0.112*
		134.3	0.046*	0.244*	-0.058	0.084	0.074	0.114	0.06	0.16	-0.112*
		134.4	0.046*	0.244*	-0.058	0.084	0.074	0.114	0.06	0.16	-0.012*
		134.5	0.046*	0.244*	-0.058	0.084	0.074	0.114	0.06	0.16	-0.112*
		134.6	0.146*	0.244*	-0.058	0.084	-0.026	0.114	0.06	0.16	-0.112*
		134.7	0.046*	0.144*	-0.058	0.084	0.074	0.114	0.06	0.16	-0.112*
		134.8	0.046*	0.144*	-0.058	0.084	0.074	0.114	0.06	0.16	-0.112*
		134.9	0.046*	0.244*	0.042	0.184	0.074	0.114	0.06	0.16	-0.112*
		135	0.046*	0.244*	0.042	0.184	0.174	0.214	0.06	0.16	-0.112*
		135.1	0.046*	0.244*	0.042	0.184	0.174	0.214	0.16	0.16	-0.012*
		135.2	0.046*	0.244*	0.042	0.184	0.074	0.114	0.16	0.16	-0.012*
		135.3	0.046*	0.244*	0.042	0.184	0.174	0.214	0.06	0.06	-0.012*
		135.4	0.146*	0.144*	0.042	0.184	0.174	0.214	0.06	0.06	-0.112*
		135.5	0.246*	0.244*	0.042	0.184	0.174	0.214	0.06	0.06	-0.112*
		135.6	0.246*	0.244*	-0.058	0.084	0.174	0.214	0.06	0.16	-0.112*
		135.7	0.146*	0.244*	-0.058	0.084	0.174	0.214	0.06	0.16	-0.112*
		135.8	0.146*	0.244*	-0.058	0.084	0.174	0.214	0.16	0.26	-0.112*
		135.9	0.146*	0.244*	-0.058	0.084	0.274	0.214	0.16	0.26	-0.112*
		136	0.146*	0.244*	-0.058	0.084	0.274	0.214	0.16	0.16	-0.112*
		136.1	0.146*	0.244*	-0.058	0.084	0.174	0.114	0.16	0.16	-0.112*
		136.2	0.146*	0.344*	-0.058	0.084	0.074	0.014	0.16	0.16	-0.112*
		136.3	0.146*	0.344*	-0.058	0.084	0.074	0.014	0.16	0.16	-0.212*
		136.4	0.146*	0.244*	-0.158	0.084	0.074	0.014	0.16	0.16	-0.212*
		136.5	0.146*	0.244*	-0.158	0.184	0.074	0.114	0.16	0.16	-0.212*
		136.6	0.146*	0.244*	-0.158	0.184	0.074	0.114	0.16	0.16	-0.212*
		136.7	0.146*	0.244*	-0.158	0.184	0.074	0.114	0.16	0.16	-0.112*
		136.8	0.146*	0.244*	-0.058	0.184	0.074	0.114	0.16	0.16	-0.112*
		136.9	0.146*	0.244*	0.042	0.284	0.074	0.114	0.16	0.16	-0.112*
		137	0.146*	0.244*	0.042	0.284	0.074	0.114	0.06	0.16	-0.112*
		137.1	0.146*	0.244*	0.042	0.284	0.074	0.114	0.06	0.16	-0.012*
		137.2	0.246*	0.244*	0.042	0.284	0.074	0.114	0.06	0.16	-0.112*
		137.3	0.246*	0.244*	0.042	0.284	0.074	0.114	-0.04	0.06	-0.112*
		137.4	0.246*	0.144*	0.042	0.284	0.074	0.114	-0.04	0.06	-0.112*
		137.5	0.246*	0.144*	0.042	0.284	0.074	0.114	0.06	0.16	-0.112*
		137.6	0.246*	0.144*	0.042	0.284	0.074	0.114	0.06	0.16	-0.212*
		137.7	0.246*	0.144*	0.042	0.284	0.074	0.114	0.06	0.16	-0.212*
		137.8	0.146*	0.144*	0.042	0.284	0.074	0.114	0.16	0.26	-0.212*
		137.9	0.146*	0.244*	0.042	0.284	0.074	0.214	0.16	0.26	-0.212*
		138	0.146*	0.244*	0.042	0.284	0.074	0.214	0.16	0.26	-0.212*
		138.1	0.146*	0.244*	0.042	0.284	0.074	0.214	0.16	0.26	-0.212*
		138.2	0.146*	0.244*	-0.058	0.284	-0.026	0.114	0.16	0.26	-0.212*
		138.3	0.046*	0.144*	-0.058	0.284	-0.026	0.014	0.16	0.16	-0.212*
		138.4	0.146*	0.144*	-0.058	0.284	-0.026	0.014	0.16	0.16	-0.312*
		138.5	0.146*	0.144*	-0.058	0.284	-0.026	0.014	0.16	0.16	-0.312*
		138.6	0.146*	0.144*	-0.058	0.284	-0.026	0.014	0.16	0.16	-0.312*
		138.7	0.146*	0.144*	-0.058	0.284	-0.026	0.014	0.16	0.16	-0.312*
		138.8	0.146*	0.144*	0.042	0.284	0.074	0.114	0.06	0.16	-0.212*
		138.9	0.146*	0.144*	-0.058	0.184	0.074	0.114	0.06	0.26	-0.112*
		139	0.146*	0.144*	-0.058	0.284	0.074	0.114	0.06	0.26	-0.112*
		139.1	0.146*	0.144*	-0.058	0.284	0.074	0.114	0.06	0.26	-0.112*
		139.2	0.046*	0.144*	-0.058	0.284	0.074	0.114	0.16	0.26	-0.212*
		139.3	0.046*	0.144*	-0.058	0.284	0.074	0.114	0.16	0.26	-0.212*
		139.4	0.046*	0.144*	-0.058	0.284	0.074	0.214	0.16	0.26	-0.212*
		139.5	0.046*	0.144*	-0.058	0.284	0.074	0.214	0.26	0.36	-0.212*
		139.6	0.046*	0.244*	-0.058	0.184	0.074	0.214	0.26	0.36	-0.212*
		139.7	0.146*	0.244*	0.042	0.284	0.174	0.214	0.16	0.26	-0.212*
		139.8	0.146*	0.244*	0.042	0.284	0.174	0.214	0.16	0.26	-0.212*
		139.9	0.146*	0.144*	0.042	0.284	0.174	0.214	0.16	0.26	-0.212*
		140	0.246*	0.244*	0.042	0.284	0.174	0.214	0.16	0.26	-0.212*
		140.1	0.246*	0.244*	0.042	0.284	0.174	0.214	0.16	0.26	-0.212*
		140.2	0.246*	0.244*	-0.058	0.284	0.174	0.214	0.16	0.26	-0.212*
		140.3	0.246*	0.244*	-0.058	0.284	0.174	0.214	0.16	0.26	-0.212*
		140.4	0.246*	0.244*	-0.058	0.284	0.174	0.214	0.26	0.26	-0.212*
		140.5	0.246*	0.244*	-0.058	0.384	0.174	0.314	0.16	0.26	-0.212*
		140.6	0.246*	0.244*	0.042	0.384	0.174	0.314	0.16	0.26	-0.212*
		140.7	0.246*	0.244*	0.042	0.384	0.174	0.314	0.16	0.26	-0.312*
		140.8	0.146*	0.144*	0.042	0.284	0.074	0.314	0.16	0.26	-0.312*
		140.9	0.146*	0.144*	0.042	0.284	0.074	0.214	0.16	0.26	-0.312*
		141	0.146*	0.144*	0.042	0.284	0.074	0.214	0.16	0.26	-0.312*
		141.1	0.146*	0.244*	0.042	0.284	0.074	0.214	0.26	0.36	-0.212*
		141.2	0.146*	0.244*	0.042	0.284	0.074	0.214	0.16	0.26	-0.212*
		141.3	0.046*	0.244*	0.042	0.284	0.074	0.214	0.16	0.26	-0.212*
		141.4	0.046*	0.244*	0.142	0.384	0.074	0.214	0.16	0.26	-0.212*
		141.5	0.046*	0.244*	0.142	0.384	0.174	0.214	0.16	0.26	-0.212*
		141.6	0.046*	0.244*	0.142	0.384	0.174	0.214	0.06	0.26	-0.212*
		141.7	0.046*	0.244*	0.042	0.384	0.174	0.214	0.06	0.36	-0.212*
		141.8	0.046*	0.244*	0.042	0.384	0.074	0.114	0.06	0.36	-0.212*
		141.9	0.046*	0.244*	0.042	0.384	0.074	0.214	0.06	0.36	-0.212*
		142	0.046*	0.144*	0.042	0.384	0.174	0.314	0.16	0.26	-0.112*
		142.1	0.046*	0.144*	0.042	0.384	0.174	0.314	0.16	0.26	-0.112*
		142.2	0.046*	0.144*	0.042	0.384	0.174	0.314	0.16	0.26	-0.112*
		142.3	0.046*	0.144*	0.042	0.384	0.174	0.314	0.16	0.26	-0.212*
		142.4	0.046*	0.044*	0.042	0.384	0.174	0.314	0.16	0.26	-0.312*
		142.5	0.046*	0.044*	0.042	0.284	0.174	0.314	0.16	0.26	-0.312*
		142.6	0.046*	0.044*	0.042	0.284	0.174	0.314	0.26	0.36	-0.312*
		142.7	0.146*	0.144*	0.042	0.284	0.174	0.314	0.26	0.36	-0.312*
		142.8	0.146*	0.144*	0.142	0.384	0.174	0.314	0.26	0.36	-0.312*
		142.9	0.146*	0.144*	0.142	0.384	0.074	0.314	0.16	0.26	-0.212*
		143	0.146*	0.144*	0.142	0.384	0.074	0.314	0.16	0.26	-0.212*
		143.1	0.146*	0.144*	0.142	0.384	0.074	0.214	0.06	0.26	-0.212*
		143.2	0.146*	0.144*	0.142	0.384	0.074	0.214	0.06	0.26	-0.212*
		143.3	0.046*	0.044*	0.142	0.384	0.174	0.214	0.06	0.26	-0.212*
		143.4	0.046*	0.044*	0.142	0.484	0.174	0.214	0.06	0.26	-0.212*
		143.5	0.046*	0.044*	0.142	0.484	0.174	0.214	0.16	0.26	-0.212*
		143.6	0.046*	0.144*	0.142	0.484	0.274	0.314	0.16	0.26	-0.212*
		143.7	0.046*	0.144*	0.142	0.484	0.274	0.414	0.16	0.16	-0.212*
		143.8	0.046*	0.144*	0.042	0.384	0.274	0.414	0.16	0.16	-0.212*
		143.9	0.046*	0.144*	0.142	0.384	0.274	0.414	0.16	0.16	-0.212*
		144	0.146*	0.244*	0.142	0.384	0.274	0.414	0.16	0.16	-0.212*
		144.1	0.146*	0.244*	0.142	0.384	0.274	0.414	0.16	0.16	-0.112*
		144.2	0.046*	0.244*	0.142	0.284	0.174	0.314	0.16	0.16	-0.112*
		144.3	0.046*	0.244*	0.142	0.284	0.174	0.314	0.06	0.16	-0.112*
		144.4	0.046*	0.244*	0.142	0.284	0.174	0.314	0.06	0.16	-0.112*
		144.5	0.046*	0.244*	0.142	0.284	0.174	0.314	-0.04	0.06	-0.112*
		144.6	0.046*	0.244*	0.142	0.284	0.174	0.314	-0.04	0.06	-0.112*
		144.7	0.046*	0.244*	0.142	0.284	0.174	0.314	-0.04	0.16	-0.112*
		144.8	0.046*	0.244*	0.142	0.284	0.174	0.314	0.06	0.26	-0.112*
		144.9	-0.054*	0.044*	0.142	0.284	0.174	0.314	0.06	0.26	-0.112*
		145	-0.054*	0.044*	0.142	0.384	0.174	0.314	0.06	0.26	-0.212*
		145.1	-0.054*	0.044*	0.142	0.384	0.074	0.314	0.06	0.26	-0.112*
		145.2	0.046*	0.044*	0.042	0.284	0.174	0.314	0.06	0.26	-0.112*
		145.3	0.046*	0.044*	0.042	0.284	0.174	0.214	0.06	0.26	-0.112*
		145.4	0.046*	0.044*	0.042	0.284	0.174	0.214	0.06	0.26	-0.112*
		145.5	0.046*	0.044*	0.142	0.384	0.174	0.214	0.06	0.26	-0.112*
		145.6	0.046*	0.044*	0.142	0.384	0.174	0.214	0.06	0.26	-0.112*
		145.7	0.046*	0.044*	0.142	0.384	0.174	0.214	0.06	0.26	-0.112*
		145.8	0.146*	0.144*	0.142	0.384	0.174	0.214	0.06	0.26	-0.112*
		145.9	0.146*	0.144*	0.142	0.384	0.074	0.214	-0.04	0.06	-0.112*
		146	0.146*	0.144*	0.242	0.384	0.074	0.214	-0.04	0.06	-0.112*
		146.1	0.146*	0.144*	0.242	0.384	0.074	0.214	-0.04	0.06	-0.112*
		146.2	0.146*	0.244*	0.142	0.384	0.074	0.214	-0.04	0.06	-0.112*
		146.3	0.146*	0.244*	0.142	0.384	0.074	0.214	-0.04	0.06	-0.112*
		146.4	0.146*	0.244*	0.142	0.384	0.074	0.214	-0.04	0.06	-0.012*
		146.5	0.146*	0.244*	0.142	0.384	0.074	0.214	0.06	0.06	-0.012*
		146.6	0.046*	0.144*	0.142	0.384	0.074	0.214	0.06	0.06	-0.012*
		146.7	0.046*	0.144*	0.142	0.384	0.074	0.214	0.06	0.06	-0.012*
		146.8	0.046*	0.144*	0.142	0.384	0.174	0.214	0.06	0.06	-0.012*
		146.9	0.046*	0.144*	0.142	0.384	0.174	0.214	0.06	0.06	-0.012*
		147	0.046*	0.144*	0.042	0.384	0.174	0.214	0.06	0.06	-0.112*
		147.1	0.046*	0.144*	0.042	0.384	0.174	0.214	0.06	0.06	-0.112*
		147.2	0.046*	0.144*	0.042	0.384	0.274	0.314	0.06	0.16	-0.112*
		147.3	0.046*	0.144*	0.042	0.384	0.274	0.314	0.06	0.16	-0.112*
		147.4	0.046*	0.144*	0.042	0.384	0.274	0.314	0.06	0.16	-0.112*
		147.5	0.046*	0.144*	0.142	0.484	0.274	0.314	0.06	0.16	-0.212*
		147.6	0.146*	0.244*	0.142	0.484	0.274	0.314	0.06	0.16	-0.112*
		147.7	0.046*	0.244*	0.142	0.484	0.174	0.114	0.06	0.16	-0.112*
		147.8	0.046*	0.244*	0.142	0.484	0.174	0.114	0.06	0.16	-0.112*
		147.9	0.046*	0.244*	0.142	0.484	0.174	0.214	0.06	0.16	-0.112*
		148	0.046*	0.244*	0.142	0.384	0.074	0.214	0.06	0.16	-0.112*
		148.1	0.046*	0.244*	0.142	0.384	0.074	0.214	0.06	0.06	-0.112*
		148.2	0.046*	0.244*	0.142	0.384	0.074	0.214	0.06	0.06	-0.112*
		148.3	0.046*	0.244*	0.142	0.384	0.074	0.214	0.06	0.06	-0.112*
		148.4	0.046*	0.244*	0.142	0.384	0.074	0.214	0.06	0.06	-0.012*
		148.5	0.046*	0.144*	0.042	0.284	0.074	0.214	0.06	0.06	-0.012*
		148.6	0.046*	0.044*	0.042	0.284	0.074	0.214	0.06	0.16	-0.012*
		148.7	0.046*	0.044*	-0.058	0.384	0.074	0.214	0.06	0.16	-0.012*
		148.8	0.046*	0.044*	-0.058	0.384	0.074	0.214	0.06	0.16	-0.012*
		148.9	0.046*	0.044*	0.142	0.484	0.074	0.214	-0.04	0.06	-0.012*
		149	0.046*	0.044*	0.142	0.484	0.174	0.214	-0.04	0.06	-0.012*
		149.1	0.046*	0.044*	0.142	0.484	0.174	0.214	-0.04	0.06	-0.012*
		149.2	0.146*	0.244*	0.142	0.484	0.174	0.214	0.06	0.06	-0.012*
		149.3	0.146*	0.244*	0.142	0.484	0.174	0.114	0.06	0.06	-0.012*
		149.4	0.146*	0.244*	0.142	0.484	0.174	0.114	0.06	0.06	-0.012*
		149.5	0.146*	0.244*	0.142	0.484	-0.026	0.014	0.06	0.06	-0.012*
		149.6	0.146*	0.244*	0.142	0.484	-0.026	0.014	0.16	0.16	-0.012*
		149.7	0.146*	0.244*	0.142	0.484	-0.026	0.014	0.16	0.16	-0.012*
		149.8	0.146*	0.244*	0.142	0.484	-0.026	0.114	0.16	0.16	-0.012*
[truncated: 5,501 more rows]

## Sheet: Figure_S5_C
		Time	3.9063	7.8125	15.6	31.3	62.5	125	250	500	3.91
		-50	-0.022*	0.238*	-0.4	-0.164	0.154	-0.07	0.536	-0.026	0.25*
		-49.9	-0.022*	0.138*	-0.4	-0.164	0.154	-0.07	0.536	-0.026	0.15*
		-49.8	-0.022*	0.138*	-0.4	-0.164	0.054	-0.07	0.436	-0.026	0.25*
		-49.7	-0.122*	0.038*	-0.3	-0.064	0.054	-0.07	0.436	-0.026	0.25*
		-49.6	0.078*	0.138*	-0.4	-0.164	0.054	-0.07	0.536	-0.026	0.25*
		-49.5	0.078*	0.138*	-0.3	-0.064	0.154	0.03	0.536	-0.126	0.25*
		-49.4	0.078*	0.138*	-0.4	-0.064	0.154	0.03	0.436	-0.226	0.25*
		-49.3	-0.022*	0.038*	-0.4	-0.064	0.154	-0.07	0.436	-0.126	0.15*
		-49.2	-0.022*	0.138*	-0.3	-0.064	0.154	-0.07	0.436	-0.126	0.25*
		-49.1	0.078*	0.138*	-0.3	-0.064	0.254	0.03	0.536	-0.126	0.25*
		-49	0.078*	0.138*	-0.4	-0.164	0.154	-0.07	0.436	-0.126	0.25*
		-48.9	0.078*	0.138*	-0.3	-0.164	0.154	-0.07	0.436	-0.026	0.25*
		-48.8	0.078*	0.138*	-0.3	-0.164	0.054	-0.07	0.436	-0.026	0.15*
		-48.7	0.078*	0.038*	-0.3	-0.164	0.154	0.03	0.436	-0.126	0.25*
		-48.6	0.078*	0.138*	-0.3	-0.064	0.254	0.03	0.536	-0.126	0.35*
		-48.5	0.078*	0.138*	-0.3	-0.064	0.254	0.03	0.436	-0.226	0.25*
		-48.4	0.078*	0.138*	-0.3	-0.164	0.154	-0.07	0.436	-0.126	0.25*
		-48.3	0.078*	0.138*	-0.3	-0.164	0.154	-0.07	0.436	-0.126	0.15*
		-48.2	0.078*	0.038*	-0.4	-0.164	0.154	0.03	0.436	-0.126	0.15*
		-48.1	0.078*	0.038*	-0.4	-0.164	0.254	0.03	0.536	-0.026	0.15*
		-48	0.078*	0.138*	-0.4	-0.164	0.054	-0.07	0.436	-0.026	0.05*
		-47.9	-0.022*	0.138*	-0.4	-0.264	0.054	-0.17	0.436	-0.026	0.25*
		-47.8	0.078*	0.238*	-0.3	-0.164	0.154	-0.07	0.436	-0.026	0.25*
		-47.7	0.078*	0.038*	-0.3	-0.164	0.254	0.03	0.436	-0.026	0.25*
		-47.6	0.078*	0.038*	-0.3	-0.164	0.254	0.03	0.536	-0.026	0.25*
		-47.5	0.078*	0.038*	-0.2	-0.164	0.154	-0.07	0.336	-0.126	0.05*
		-47.4	0.078*	0.138*	-0.4	-0.164	0.154	-0.07	0.336	-0.126	0.15*
		-47.3	0.078*	0.038*	-0.4	-0.164	0.154	0.03	0.336	-0.126	0.25*
		-47.2	0.078*	0.038*	-0.4	-0.164	0.254	-0.07	0.336	-0.126	0.25*
		-47.1	0.078*	0.038*	-0.3	-0.164	0.154	-0.07	0.436	-0.026	0.15*
		-47	0.178*	0.138*	-0.3	-0.164	0.054	-0.17	0.436	-0.026	0.15*
		-46.9	0.078*	0.238*	-0.4	-0.264	0.054	-0.17	0.436	-0.026	0.15*
		-46.8	-0.022*	0.138*	-0.4	-0.264	0.054	-0.07	0.436	-0.026	0.35*
		-46.7	0.078*	0.138*	-0.3	-0.264	0.054	-0.07	0.536	0.074	0.35*
		-46.6	0.078*	0.038*	-0.3	-0.264	0.154	-0.07	0.436	-0.026	0.25*
		-46.5	0.078*	0.138*	-0.3	-0.264	0.154	-0.07	0.336	-0.026	0.25*
		-46.4	0.078*	0.138*	-0.3	-0.164	0.154	-0.07	0.336	-0.026	0.25*
		-46.3	0.078*	0.138*	-0.3	-0.264	0.154	-0.07	0.436	0.074	0.15*
		-46.2	0.278*	0.238*	-0.3	-0.264	0.154	-0.07	0.536	0.074	0.25*
		-46.1	0.178*	0.338*	-0.4	-0.264	0.154	-0.07	0.536	0.074	0.25*
		-46	0.078*	0.238*	-0.3	-0.164	0.154	-0.07	0.436	-0.026	0.25*
		-45.9	0.078*	0.238*	-0.3	-0.264	0.154	0.03	0.336	-0.026	0.25*
		-45.8	0.078*	0.238*	-0.3	-0.264	0.054	-0.07	0.336	0.074	0.25*
		-45.7	0.178*	0.138*	-0.3	-0.264	0.054	-0.17	0.336	0.074	0.35*
		-45.6	0.178*	0.138*	-0.2	-0.264	0.154	-0.07	0.436	0.074	0.35*
		-45.5	0.178*	0.238*	-0.2	-0.164	0.154	-0.07	0.336	-0.026	0.25*
		-45.4	0.178*	0.238*	-0.1	-0.064	0.054	-0.07	0.336	-0.126	0.35*
		-45.3	0.078*	0.238*	-0.3	-0.164	0.054	-0.07	0.436	-0.026	0.35*
		-45.2	0.078*	0.238*	-0.3	-0.264	0.054	-0.07	0.336	-0.026	0.25*
		-45.1	0.078*	0.138*	-0.3	-0.164	0.054	0.03	0.336	0.074	0.25*
		-45	0.178*	0.238*	-0.2	-0.164	0.054	0.03	0.336	0.074	0.35*
		-44.9	0.078*	0.238*	-0.2	-0.164	0.154	0.13	0.236	-0.026	0.45*
		-44.8	-0.022*	0.138*	-0.2	-0.164	0.054	0.03	0.336	-0.026	0.35*
		-44.7	-0.022*	0.138*	-0.1	-0.264	0.154	0.23	0.436	0.074	0.35*
		-44.6	-0.122*	0.138*	-0.2	-0.164	0.054	0.23	0.336	0.074	0.35*
		-44.5	-0.122*	0.138*	-0.3	-0.264	0.054	0.13	0.436	-0.026	0.35*
		-44.4	-0.122*	0.038*	-0.3	-0.264	0.054	0.13	0.336	0.074	0.35*
		-44.3	-0.122*	0.138*	-0.1	-0.064	-0.046	0.03	0.336	0.074	0.55*
		-44.2	-0.022*	0.238*	-0.1	-0.064	-0.046	-0.07	0.336	-0.026	0.45*
		-44.1	-0.022*	0.138*	-0.1	-0.164	-0.046	-0.17	0.336	-0.026	0.45*
		-44	0.078*	0.138*	-0.1	-0.264	-0.246	-0.27	0.436	0.174	0.45*
		-43.9	0.178*	0.238*	-0.1	-0.264	-0.146	-0.37	0.436	0.074	0.35*
		-43.8	0.278*	0.238*	-0.2	-0.264	-0.046	-0.27	0.436	-0.026	0.45*
		-43.7	0.178*	0.238*	-0.1	-0.164	0.054	-0.17	0.336	0.074	0.35*
		-43.6	0.278*	0.238*	0	-0.064	0.054	-0.17	0.336	0.074	0.35*
		-43.5	0.078*	0.238*	-0.1	-0.264	0.054	-0.17	0.336	-0.026	0.45*
		-43.4	0.178*	0.238*	0	-0.164	-0.046	-0.17	0.336	0.074	0.45*
		-43.3	0.278*	0.338*	-0.1	-0.264	-0.146	-0.27	0.336	-0.026	0.45*
		-43.2	0.178*	0.238*	-0.2	-0.264	-0.046	-0.17	0.436	0.074	0.45*
		-43.1	0.178*	0.138*	-0.1	-0.164	0.054	-0.07	0.436	0.074	0.55*
		-43	0.178*	0.138*	-0.2	-0.264	0.054	-0.07	0.436	0.174	0.45*
		-42.9	-0.022*	0.138*	-0.1	-0.264	-0.046	0.03	0.336	0.074	0.45*
		-42.8	-0.022*	0.138*	-0.1	-0.264	-0.046	0.03	0.336	-0.026	0.45*
		-42.7	0.078*	0.138*	-0.2	-0.164	-0.046	-0.17	0.336	-0.026	0.45*
		-42.6	0.178*	0.138*	-0.2	-0.264	-0.046	-0.17	0.436	0.174	0.55*
		-42.5	0.178*	0.138*	-0.2	-0.264	0.054	-0.07	0.436	0.174	0.45*
		-42.4	0.178*	0.138*	-0.1	-0.264	-0.046	0.03	0.436	0.074	0.45*
		-42.3	0.078*	0.038*	-0.1	-0.164	-0.046	0.03	0.436	0.074	0.55*
		-42.2	0.078*	0.038*	-0.1	-0.164	-0.046	0.03	0.336	0.074	0.55*
		-42.1	0.178*	0.038*	-0.2	-0.164	0.054	0.03	0.336	0.074	0.55*
		-42	0.078*	0.138*	-0.2	-0.164	-0.046	-0.07	0.336	0.074	0.55*
		-41.9	0.078*	0.038*	-0.1	-0.264	-0.046	0.03	0.336	0.074	0.55*
		-41.8	0.078*	0.038*	-0.1	-0.164	-0.046	-0.07	0.436	0.174	0.65*
		-41.7	0.078*	0.038*	-0.1	-0.164	0.054	-0.07	0.436	0.174	0.65*
		-41.6	0.178*	0.038*	-0.2	-0.264	0.054	-0.07	0.436	0.174	0.55*
		-41.5	0.078*	-0.062*	-0.2	-0.264	0.054	-0.07	0.436	0.174	0.55*
		-41.4	0.078*	-0.062*	-0.1	-0.164	0.054	-0.07	0.436	0.174	0.55*
		-41.3	0.078*	0.038*	-0.1	-0.064	0.054	-0.07	0.336	0.074	0.55*
		-41.2	0.078*	0.038*	-0.1	-0.064	0.154	0.03	0.336	0.074	0.45*
		-41.1	0.078*	0.038*	-0.2	-0.264	0.054	-0.17	0.336	0.074	0.45*
		-41	0.078*	-0.062*	-0.2	-0.264	-0.046	-0.17	0.436	0.174	0.45*
		-40.9	0.078*	-0.062*	-0.2	-0.264	-0.046	-0.17	0.436	0.174	0.35*
		-40.8	-0.022*	-0.062*	-0.2	-0.164	-0.046	-0.17	0.436	0.174	0.45*
		-40.7	-0.022*	-0.062*	-0.2	-0.164	-0.046	-0.17	0.336	0.074	0.55*
		-40.6	-0.022*	-0.062*	-0.1	-0.164	-0.046	-0.17	0.436	0.074	0.55*
		-40.5	-0.022*	-0.062*	-0.2	-0.264	0.054	-0.07	0.436	0.074	0.55*
		-40.4	0.078*	-0.062*	-0.3	-0.264	0.054	-0.07	0.336	0.074	0.45*
		-40.3	0.078*	-0.062*	-0.3	-0.164	0.054	-0.07	0.336	0.074	0.45*
		-40.2	0.078*	-0.062*	-0.3	-0.164	0.054	-0.07	0.236	-0.026	0.45*
		-40.1	0.078*	-0.062*	-0.2	-0.164	-0.146	-0.17	0.236	0.074	0.45*
		-40	0.078*	-0.062*	-0.2	-0.164	-0.046	-0.27	0.236	-0.026	0.45*
		-39.9	0.078*	0.038*	-0.2	-0.164	-0.046	-0.27	0.236	-0.026	0.45*
		-39.8	-0.122*	-0.062*	-0.2	-0.164	-0.046	-0.27	0.236	-0.026	0.45*
		-39.7	-0.122*	-0.062*	-0.2	-0.164	-0.046	-0.27	0.336	-0.026	0.45*
		-39.6	-0.022*	-0.062*	-0.2	-0.264	-0.046	-0.27	0.336	-0.026	0.55*
		-39.5	-0.022*	-0.162*	-0.2	-0.264	-0.046	-0.17	0.436	0.074	0.45*
		-39.4	-0.022*	-0.162*	-0.2	-0.164	0.054	-0.17	0.436	0.074	0.35*
		-39.3	0.078*	-0.062*	-0.2	-0.164	0.054	-0.17	0.436	0.174	0.35*
		-39.2	0.078*	0.038*	-0.3	-0.164	0.054	-0.17	0.436	0.174	0.35*
		-39.1	-0.022*	-0.062*	-0.3	-0.264	0.054	-0.17	0.336	0.174	0.45*
		-39	-0.022*	-0.062*	-0.3	-0.264	0.054	-0.17	0.236	0.074	0.45*
		-38.9	0.078*	-0.062*	-0.3	-0.264	-0.046	-0.17	0.236	0.074	0.45*
		-38.8	0.078*	-0.062*	-0.3	-0.264	-0.046	-0.17	0.236	0.074	0.45*
		-38.7	-0.022*	-0.062*	-0.3	-0.264	-0.046	-0.17	0.236	0.074	0.45*
		-38.6	-0.022*	-0.062*	-0.3	-0.264	0.054	-0.07	0.336	0.174	0.45*
		-38.5	-0.022*	-0.062*	-0.3	-0.164	0.054	-0.07	0.336	0.174	0.35*
		-38.4	-0.022*	-0.062*	-0.3	-0.164	0.054	-0.07	0.336	0.074	0.35*
		-38.3	-0.122*	-0.162*	-0.3	-0.164	0.054	-0.07	0.336	0.074	0.35*
		-38.2	-0.022*	-0.062*	-0.2	-0.164	0.054	-0.07	0.336	0.074	0.35*
		-38.1	-0.022*	0.038*	-0.2	-0.164	0.254	-0.07	0.336	0.074	0.45*
		-38	0.078*	0.038*	-0.2	-0.164	0.254	-0.07	0.336	0.174	0.55*
		-37.9	0.078*	0.038*	-0.2	-0.164	0.254	-0.07	0.336	0.174	0.55*
		-37.8	0.078*	0.038*	-0.1	-0.064	0.154	-0.17	0.336	0.174	0.45*
		-37.7	0.078*	-0.062*	-0.1	-0.064	0.154	-0.07	0.236	0.174	0.45*
		-37.6	0.078*	-0.062*	-0.2	-0.164	0.154	-0.07	0.236	0.174	0.45*
		-37.5	0.078*	-0.062*	-0.2	-0.164	0.154	-0.07	0.236	0.174	0.45*
		-37.4	-0.122*	-0.162*	-0.2	-0.064	0.054	-0.07	0.236	-0.026	0.35*
		-37.3	-0.122*	-0.162*	-0.2	-0.064	0.054	-0.07	0.236	-0.026	0.35*
		-37.2	-0.122*	-0.162*	-0.2	-0.064	0.054	-0.07	0.236	-0.026	0.35*
		-37.1	-0.122*	-0.162*	-0.2	-0.164	0.154	-0.07	0.236	-0.026	0.25*
		-37	-0.122*	-0.162*	-0.1	-0.164	0.154	-0.07	0.236	-0.026	0.35*
		-36.9	-0.122*	-0.162*	-0.2	-0.164	0.254	0.03	0.236	0.074	0.35*
		-36.8	-0.122*	-0.162*	-0.2	-0.164	0.154	-0.07	0.236	0.074	0.35*
		-36.7	-0.122*	-0.162*	-0.2	-0.164	0.154	-0.07	0.236	0.074	0.35*
		-36.6	-0.022*	-0.062*	-0.2	-0.164	0.154	-0.07	0.236	0.074	0.35*
		-36.5	-0.122*	-0.162*	-0.2	-0.164	0.154	0.03	0.336	0.174	0.35*
		-36.4	-0.122*	-0.162*	-0.2	-0.164	0.054	0.03	0.336	0.174	0.25*
		-36.3	-0.122*	-0.162*	-0.2	-0.164	0.054	0.03	0.336	0.174	0.25*
		-36.2	-0.022*	-0.062*	-0.2	-0.064	0.054	-0.07	0.336	0.274	0.15*
		-36.1	-0.022*	-0.062*	-0.2	-0.064	0.154	-0.07	0.236	0.074	0.25*
		-36	-0.022*	-0.062*	-0.2	-0.064	0.154	-0.07	0.236	0.074	0.25*
		-35.9	-0.022*	-0.062*	-0.2	-0.064	0.154	-0.07	0.236	0.074	0.35*
		-35.8	-0.022*	-0.062*	-0.2	-0.064	0.154	-0.07	0.236	0.074	0.35*
		-35.7	0.078*	-0.062*	-0.3	-0.164	0.154	0.03	0.236	0.074	0.35*
		-35.6	0.078*	-0.062*	-0.3	-0.164	0.054	-0.07	0.236	0.074	0.35*
		-35.5	0.078*	-0.062*	-0.3	-0.164	0.054	-0.07	0.236	0.074	0.25*
		-35.4	0.078*	0.038*	-0.4	-0.264	0.054	-0.07	0.236	0.074	0.25*
		-35.3	-0.022*	0.038*	-0.3	-0.164	0.154	0.03	0.236	0.074	0.25*
		-35.2	-0.022*	0.038*	-0.2	-0.064	0.154	0.03	0.236	0.074	0.25*
		-35.1	-0.022*	0.038*	-0.2	-0.064	0.154	0.03	0.236	0.174	0.25*
		-35	-0.022*	0.038*	-0.2	-0.064	0.154	0.03	0.236	0.174	0.25*
		-34.9	-0.022*	-0.062*	-0.2	-0.064	0.154	0.03	0.136	0.074	0.35*
		-34.8	-0.122*	-0.162*	-0.2	-0.064	0.254	0.03	0.136	0.074	0.35*
		-34.7	-0.122*	-0.162*	-0.2	-0.064	0.254	0.03	0.236	0.074	0.35*
		-34.6	-0.122*	-0.162*	-0.2	-0.064	0.154	-0.07	0.136	0.074	0.35*
		-34.5	-0.122*	-0.162*	-0.3	-0.164	0.154	0.03	0.136	0.074	0.35*
		-34.4	0.078*	-0.062*	-0.3	-0.164	0.154	0.03	0.236	0.074	0.35*
		-34.3	0.078*	0.038*	-0.3	-0.164	0.254	0.03	0.236	0.074	0.35*
		-34.2	0.078*	0.038*	-0.2	-0.164	0.254	0.03	0.236	0.074	0.35*
		-34.1	0.078*	0.038*	-0.2	-0.064	0.154	0.03	0.236	0.074	0.35*
		-34	0.078*	0.038*	-0.1	0.036	0.154	0.03	0.236	0.174	0.35*
		-33.9	0.078*	0.038*	-0.1	0.036	0.154	0.03	0.236	0.174	0.35*
		-33.8	0.078*	0.038*	-0.1	0.036	0.154	0.03	0.336	0.174	0.35*
		-33.7	0.078*	0.138*	-0.2	0.036	0.154	0.03	0.236	0.074	0.45*
		-33.6	0.078*	0.138*	-0.3	-0.164	0.254	0.13	0.236	0.074	0.35*
		-33.5	0.178*	0.138*	-0.3	-0.164	0.254	0.13	0.236	0.074	0.35*
		-33.4	0.178*	0.138*	-0.3	-0.164	0.254	0.13	0.236	0.174	0.35*
		-33.3	0.178*	0.138*	-0.3	-0.064	0.254	0.13	0.236	0.174	0.35*
		-33.2	0.078*	0.138*	-0.2	-0.064	0.254	0.13	0.136	0.074	0.25*
		-33.1	-0.022*	-0.062*	-0.2	-0.064	0.154	-0.07	0.136	0.074	0.35*
		-33	-0.022*	0.038*	-0.2	-0.064	0.154	-0.07	0.136	0.074	0.35*
		-32.9	-0.022*	0.038*	-0.2	-0.064	0.154	-0.07	0.236	0.074	0.35*
		-32.8	0.078*	0.038*	-0.1	0.036	0.254	0.13	0.236	0.074	0.35*
		-32.7	0.078*	0.038*	-0.1	0.036	0.354	0.13	0.336	0.174	0.35*
		-32.6	0.078*	0.038*	-0.1	0.136	0.354	0.13	0.236	0.074	0.35*
		-32.5	0.078*	0.038*	-0.2	0.036	0.354	0.13	0.236	0.074	0.35*
		-32.4	0.178*	0.138*	-0.1	0.036	0.354	0.13	0.236	0.074	0.35*
		-32.3	0.178*	0.238*	-0.1	0.036	0.254	0.13	0.136	0.174	0.35*
		-32.2	0.078*	0.238*	-0.1	-0.064	0.254	0.13	0.236	0.174	0.35*
		-32.1	0.078*	0.238*	-0.1	-0.064	0.154	0.03	0.236	0.174	0.35*
		-32	-0.022*	0.138*	-0.1	-0.064	0.154	0.03	0.236	0.174	0.35*
		-31.9	0.078*	0.138*	-0.1	-0.064	0.154	0.13	0.136	0.074	0.35*
		-31.8	0.078*	0.038*	-0.1	-0.064	0.254	0.23	0.136	0.074	0.35*
		-31.7	0.078*	0.138*	0	-0.064	0.354	0.23	0.136	0.074	0.25*
		-31.6	0.078*	0.138*	0	-0.064	0.354	0.23	0.036	0.174	0.25*
		-31.5	0.078*	0.138*	-0.1	-0.064	0.354	0.23	0.036	0.174	0.25*
		-31.4	0.078*	0.138*	-0.1	-0.064	0.254	0.13	0.136	0.074	0.35*
		-31.3	0.178*	0.238*	-0.2	-0.064	0.254	0.13	0.136	0.074	0.35*
		-31.2	0.078*	0.138*	-0.2	-0.064	0.254	0.13	0.236	0.174	0.35*
		-31.1	0.178*	0.138*	-0.2	-0.064	0.254	0.13	0.236	0.174	0.35*
		-31	0.178*	0.138*	-0.1	0.036	0.254	0.13	0.236	0.174	0.35*
		-30.9	0.178*	0.138*	-0.1	0.036	0.254	0.13	0.236	0.174	0.35*
		-30.8	0.078*	0.238*	0	0.036	0.254	0.13	0.136	0.074	0.35*
		-30.7	0.078*	0.138*	0	0.036	0.354	0.13	0.236	0.074	0.35*
		-30.6	0.078*	0.138*	-0.1	-0.164	0.354	0.13	0.136	0.074	0.45*
		-30.5	0.078*	0.138*	-0.1	-0.064	0.354	0.13	0.136	0.174	0.35*
		-30.4	0.078*	0.138*	-0.1	-0.064	0.354	0.13	0.136	0.174	0.25*
		-30.3	-0.022*	0.038*	-0.1	-0.064	0.254	0.13	0.136	0.174	0.35*
		-30.2	-0.022*	0.138*	-0.1	-0.064	0.254	0.13	0.136	0.074	0.35*
		-30.1	0.078*	0.138*	-0.1	-0.064	0.154	0.03	0.136	0.074	0.35*
		-30	0.078*	0.138*	0	-0.064	0.154	0.13	0.136	-0.026	0.35*
		-29.9	0.178*	0.238*	0	-0.064	0.154	0.13	0.236	0.074	0.35*
		-29.8	0.178*	0.238*	-0.1	-0.164	0.154	0.13	0.136	0.174	0.45*
		-29.7	0.178*	0.238*	-0.1	-0.064	0.154	0.13	0.136	0.174	0.45*
		-29.6	-0.022*	0.038*	-0.1	-0.064	0.154	0.03	0.136	0.174	0.35*
		-29.5	-0.022*	0.038*	-0.1	-0.064	0.254	0.03	0.236	0.174	0.35*
		-29.4	-0.022*	0.038*	-0.1	-0.064	0.154	-0.07	0.236	0.174	0.35*
		-29.3	-0.022*	0.138*	-0.1	-0.064	0.154	-0.07	0.236	0.174	0.35*
		-29.2	-0.022*	0.138*	-0.1	-0.064	0.154	0.03	0.236	0.174	0.25*
		-29.1	0.078*	0.138*	-0.1	-0.164	0.154	0.13	0.236	0.174	0.25*
		-29	0.078*	0.138*	-0.1	-0.164	0.154	0.13	0.136	0.274	0.35*
		-28.9	0.178*	0.238*	0	-0.064	0.154	0.13	0.236	0.274	0.35*
		-28.8	0.078*	0.138*	0	0.036	0.154	0.13	0.236	0.274	0.35*
		-28.7	0.078*	0.138*	0	0.036	0.154	0.03	0.236	0.274	0.35*
		-28.6	0.078*	0.238*	0	0.036	0.154	0.03	0.236	0.174	0.45*
		-28.5	0.078*	0.138*	-0.1	-0.064	0.154	0.13	0.236	0.174	0.35*
		-28.4	0.078*	0.138*	-0.1	-0.064	0.154	0.13	0.336	0.174	0.45*
		-28.3	-0.022*	0.038*	-0.1	0.036	0.154	0.13	0.336	0.274	0.45*
		-28.2	0.078*	0.138*	0	-0.064	0.154	0.13	0.236	0.274	0.45*
		-28.1	0.078*	0.238*	-0.1	-0.064	0.054	0.03	0.236	0.274	0.45*
		-28	0.078*	0.238*	-0.1	-0.064	0.054	0.03	0.236	0.174	0.45*
		-27.9	0.078*	0.238*	0	0.036	0.054	0.03	0.336	0.274	0.45*
		-27.8	0.078*	0.138*	-0.1	-0.064	0.154	0.13	0.336	0.274	0.45*
		-27.7	0.078*	0.138*	-0.1	0.036	0.154	0.13	0.336	0.274	0.45*
		-27.6	0.078*	0.138*	0	0.036	0.154	0.13	0.136	0.274	0.35*
		-27.5	0.078*	0.038*	0	0.036	0.154	0.13	0.236	0.274	0.35*
		-27.4	0.078*	0.238*	0	0.036	0.154	0.13	0.236	0.274	0.35*
		-27.3	0.078*	0.238*	-0.1	-0.064	0.054	0.03	0.236	0.174	0.35*
		-27.2	0.078*	0.238*	0	0.036	0.054	0.13	0.336	0.274	0.35*
		-27.1	-0.022*	0.138*	0	0.036	0.054	0.13	0.336	0.274	0.45*
		-27	-0.022*	0.038*	0	0.036	0.054	0.13	0.336	0.174	0.45*
		-26.9	0.078*	0.138*	0	0.036	0.154	0.13	0.336	0.274	0.45*
		-26.8	0.078*	0.138*	0	0.036	0.054	0.03	0.336	0.274	0.45*
		-26.7	0.078*	0.138*	0	0.036	-0.046	0.03	0.236	0.274	0.25*
		-26.6	0.178*	0.238*	0.1	0.136	0.054	0.13	0.336	0.274	0.35*
		-26.5	-0.022*	0.138*	0.1	0.136	0.054	0.13	0.336	0.174	0.35*
		-26.4	-0.022*	0.138*	0.1	0.036	0.154	0.13	0.336	0.174	0.45*
		-26.3	-0.022*	0.238*	0.1	0.036	0.054	0.03	0.336	0.174	0.45*
		-26.2	0.078*	0.138*	0.1	0.036	0.054	0.03	0.336	0.274	0.35*
		-26.1	0.078*	0.138*	0	-0.064	0.054	0.03	0.336	0.274	0.35*
		-26	0.178*	0.238*	0.1	0.136	-0.046	0.13	0.336	0.174	0.35*
		-25.9	0.078*	0.138*	0.1	0.136	0.054	0.13	0.236	0.174	0.35*
		-25.8	0.078*	0.138*	0.1	0.136	0.054	0.03	0.336	0.174	0.45*
		-25.7	0.178*	0.238*	0	0.036	0.054	0.03	0.336	0.174	0.45*
		-25.6	0.078*	0.138*	0	0.136	0.154	0.03	0.236	0.074	0.45*
		-25.5	-0.022*	0.038*	0.1	0.036	0.154	0.13	0.236	0.174	0.35*
		-25.4	-0.022*	0.038*	0.1	0.036	0.154	0.13	0.336	0.174	0.35*
		-25.3	-0.022*	0.038*	0.2	0.136	0.154	0.13	0.236	0.074	0.25*
		-25.2	0.078*	0.138*	0.1	0.136	0.054	0.03	0.236	0.074	0.35*
		-25.1	0.178*	0.238*	0.2	0.136	0.054	0.03	0.236	0.074	0.35*
		-25	-0.022*	0.138*	0.1	0.136	0.154	0.13	0.336	0.174	0.45*
		-24.9	-0.022*	0.138*	0.1	0.136	0.054	0.13	0.236	0.074	0.35*
		-24.8	-0.022*	0.138*	0.1	0.136	0.054	0.13	0.136	-0.026	0.35*
		-24.7	-0.022*	0.038*	0.1	0.136	0.054	0.13	0.136	-0.026	0.25*
		-24.6	0.078*	0.038*	0.2	0.136	0.054	0.13	0.236	0.074	0.35*
		-24.5	0.078*	0.138*	0.2	0.236	0.054	0.03	0.236	0.074	0.25*
		-24.4	-0.022*	0.038*	0.2	0.236	0.054	0.03	0.236	0.074	0.25*
		-24.3	-0.022*	0.038*	0.1	0.236	-0.046	-0.07	0.136	-0.026	0.25*
		-24.2	-0.022*	0.038*	0.1	0.236	0.054	0.03	0.136	-0.026	0.35*
		-24.1	0.178*	0.138*	0.2	0.136	0.054	0.03	0.136	-0.126	0.35*
		-24	0.078*	0.138*	0.2	0.136	0.054	0.13	0.236	-0.026	0.25*
		-23.9	0.078*	0.138*	0.2	0.136	0.054	0.13	0.236	-0.026	0.35*
		-23.8	0.078*	0.238*	0.2	0.136	0.054	0.13	0.236	0.074	0.25*
		-23.7	-0.022*	0.138*	0.1	0.036	-0.046	-0.07	0.136	-0.026	0.25*
		-23.6	-0.022*	0.138*	0	0.036	-0.046	-0.07	0.136	-0.026	0.25*
		-23.5	-0.022*	0.138*	0.1	0.136	-0.046	-0.07	0.036	-0.026	0.15*
		-23.4	-0.022*	0.138*	0.1	0.136	-0.046	-0.07	0.136	-0.026	0.15*
		-23.3	-0.022*	0.138*	0.1	0.136	-0.046	-0.07	0.136	-0.126	0.25*
		-23.2	0.078*	0.038*	0.2	0.136	-0.046	0.03	0.036	-0.226	0.35*
		-23.1	0.078*	0.038*	0.2	0.136	-0.046	0.03	0.036	-0.226	0.35*
		-23	-0.022*	0.038*	0.2	0.136	-0.046	0.03	0.036	-0.226	0.35*
		-22.9	0.078*	0.138*	0.2	0.136	-0.046	0.03	0.036	-0.226	0.25*
		-22.8	0.078*	0.138*	0.2	0.236	0.054	0.03	0.036	-0.126	0.25*
		-22.7	0.078*	0.238*	0.1	0.236	-0.046	-0.07	0.036	-0.126	0.25*
		-22.6	0.078*	0.238*	0	0.036	-0.046	-0.07	0.036	-0.126	0.25*
		-22.5	-0.022*	0.138*	0	0.036	0.054	-0.07	0.136	-0.026	0.35*
		-22.4	-0.022*	0.138*	0	0.036	0.054	0.03	0.236	-0.026	0.35*
		-22.3	-0.022*	0.138*	0	0.036	-0.046	0.03	0.236	-0.126	0.45*
		-22.2	0.078*	0.138*	0	0.036	-0.046	0.03	0.236	-0.126	0.35*
		-22.1	0.078*	0.138*	0	0.036	-0.046	0.03	0.136	-0.126	0.25*
		-22	-0.022*	0.138*	0.2	0.136	-0.046	0.03	0.036	-0.226	0.25*
		-21.9	-0.022*	0.138*	0.2	0.136	-0.046	0.03	0.036	-0.226	0.25*
		-21.8	-0.022*	0.138*	0.1	0.136	-0.046	0.03	0.036	-0.126	0.25*
		-21.7	-0.022*	0.138*	0	0.036	-0.046	0.03	0.036	-0.126	0.35*
		-21.6	-0.022*	0.238*	0	0.136	0.054	0.03	0.036	-0.126	0.35*
		-21.5	-0.022*	0.138*	0	0.036	-0.046	-0.07	0.036	-0.126	0.35*
		-21.4	-0.022*	0.138*	0	0.036	-0.046	-0.07	0.036	-0.126	0.35*
		-21.3	-0.022*	0.138*	0	0.036	-0.046	-0.07	0.036	-0.126	0.35*
		-21.2	-0.022*	0.138*	0	0.036	-0.146	-0.07	0.036	-0.126	0.45*
		-21.1	0.078*	0.138*	0	0.036	-0.146	-0.07	0.036	-0.126	0.35*
		-21	0.078*	0.138*	0	0.036	-0.146	-0.07	0.136	-0.126	0.35*
		-20.9	0.078*	0.138*	0.1	0.036	-0.146	-0.07	0.136	-0.026	0.25*
		-20.8	0.078*	0.138*	0.1	0.036	-0.146	-0.07	0.136	-0.126	0.25*
		-20.7	-0.022*	0.138*	0.1	0.036	-0.146	-0.07	0.036	-0.226	0.25*
		-20.6	-0.022*	0.238*	0.1	0.036	-0.046	0.03	0.036	-0.226	0.35*
		-20.5	-0.022*	0.238*	0.1	0.036	0.054	-0.07	0.036	-0.226	0.35*
		-20.4	-0.022*	0.238*	0.1	0.036	0.054	-0.07	0.036	-0.226	0.35*
		-20.3	-0.022*	0.238*	0.1	0.036	0.054	-0.07	-0.064	-0.226	0.35*
		-20.2	0.078*	0.238*	0.1	0.036	0.054	-0.07	0.036	-0.126	0.35*
		-20.1	-0.022*	0.138*	0.1	0.036	-0.046	-0.07	0.036	-0.126	0.45*
		-20	-0.022*	0.138*	0.1	-0.064	-0.046	-0.07	0.036	-0.126	0.45*
		-19.9	-0.022*	0.138*	0	-0.064	-0.046	-0.07	0.036	-0.126	0.45*
		-19.8	-0.022*	0.138*	0	-0.064	-0.146	-0.17	0.036	-0.126	0.35*
		-19.7	-0.022*	0.138*	0	0.036	-0.146	-0.17	0.036	-0.126	0.35*
		-19.6	0.078*	0.138*	0	0.036	-0.146	-0.07	0.036	-0.126	0.35*
		-19.5	0.078*	0.038*	0	0.036	-0.146	-0.07	0.036	-0.126	0.25*
		-19.4	0.078*	0.038*	-0.1	-0.064	-0.146	-0.07	0.036	-0.126	0.25*
		-19.3	0.078*	0.038*	0	0.036	-0.146	-0.07	0.036	-0.126	0.25*
		-19.2	0.078*	0.038*	0	0.036	-0.046	-0.07	-0.064	-0.226	0.25*
		-19.1	0.178*	0.138*	0	-0.064	-0.046	-0.07	-0.064	-0.226	0.25*
		-19	0.178*	0.138*	0	-0.064	-0.046	-0.07	-0.064	-0.226	0.35*
		-18.9	0.078*	0.138*	0	-0.064	-0.046	-0.07	-0.064	-0.226	0.45*
		-18.8	0.078*	0.138*	0	-0.064	-0.146	-0.17	-0.064	-0.226	0.35*
		-18.7	-0.022*	0.038*	0.1	-0.064	-0.146	-0.17	-0.064	-0.226	0.35*
		-18.6	-0.022*	0.038*	0	-0.064	-0.146	-0.17	-0.064	-0.326	0.35*
		-18.5	-0.022*	0.138*	0	-0.064	-0.246	-0.17	-0.164	-0.226	0.25*
		-18.4	-0.022*	0.138*	0	-0.064	-0.246	-0.17	-0.164	-0.226	0.25*
		-18.3	-0.022*	0.138*	0	-0.064	-0.246	-0.17	-0.164	-0.226	0.25*
		-18.2	-0.022*	-0.062*	0	-0.064	-0.246	-0.17	-0.164	-0.226	0.25*
		-18.1	-0.022*	-0.062*	0	-0.064	-0.246	-0.17	-0.164	-0.226	0.25*
		-18	-0.022*	-0.062*	0	-0.064	-0.246	-0.17	-0.164	-0.226	0.25*
		-17.9	-0.022*	-0.062*	0	-0.064	-0.246	-0.17	-0.164	-0.226	0.25*
		-17.8	-0.022*	-0.062*	0	-0.064	-0.146	-0.07	-0.164	-0.226	0.25*
		-17.7	-0.022*	-0.062*	0	-0.064	-0.146	-0.07	-0.164	-0.226	0.25*
		-17.6	-0.022*	-0.062*	0	-0.064	-0.146	-0.07	-0.164	-0.226	0.25*
		-17.5	-0.022*	-0.062*	0	-0.064	-0.146	-0.17	-0.164	-0.226	0.25*
		-17.4	-0.022*	-0.062*	0	-0.064	-0.146	-0.17	-0.164	-0.226	0.25*
		-17.3	-0.022*	-0.062*	0	-0.064	-0.146	-0.27	-0.164	-0.226	0.25*
		-17.2	-0.022*	-0.062*	0	-0.064	-0.146	-0.27	-0.164	-0.226	0.25*
		-17.1	-0.022*	-0.062*	0	-0.064	-0.146	-0.27	-0.164	-0.226	0.25*
		-17	-0.022*	-0.062*	0	-0.064	-0.146	-0.27	-0.064	-0.126	0.25*
		-16.9	-0.022*	-0.062*	0	-0.064	-0.146	-0.27	-0.064	-0.226	0.25*
		-16.8	-0.022*	-0.062*	0	-0.064	-0.146	-0.27	-0.064	-0.226	0.25*
		-16.7	-0.022*	-0.062*	0	-0.064	-0.146	-0.27	-0.064	-0.226	0.25*
		-16.6	-0.022*	-0.062*	0	-0.064	-0.146	-0.27	-0.064	-0.226	0.25*
		-16.5	0.078*	0.038*	0	-0.164	-0.146	-0.27	-0.064	-0.226	0.25*
		-16.4	0.078*	0.038*	0	-0.164	-0.146	-0.27	-0.064	-0.226	0.25*
		-16.3	0.078*	0.038*	0	-0.164	-0.146	-0.27	-0.064	-0.226	0.25*
		-16.2	0.078*	0.038*	0	-0.164	-0.146	-0.27	-0.064	-0.226	0.25*
		-16.1	0.078*	0.038*	0	-0.164	-0.146	-0.27	-0.064	-0.226	0.15*
		-16	0.078*	0.038*	-0.1	-0.164	-0.146	-0.27	-0.164	-0.226	0.15*
		-15.9	0.078*	0.038*	-0.1	-0.164	-0.146	-0.27	-0.164	-0.226	0.05*
		-15.8	0.078*	0.038*	-0.1	-0.164	-0.046	-0.17	-0.164	-0.226	0.05*
		-15.7	0.078*	0.038*	-0.1	-0.264	-0.046	-0.17	-0.164	-0.226	0.05*
		-15.6	0.078*	0.038*	-0.1	-0.264	-0.046	-0.17	-0.164	-0.226	0.05*
		-15.5	0.078*	0.038*	-0.1	-0.264	-0.046	-0.17	-0.164	-0.226	0.05*
		-15.4	0.078*	-0.062*	0	-0.164	-0.046	-0.17	-0.164	-0.226	0.05*
		-15.3	0.078*	-0.062*	0	-0.164	-0.146	-0.17	-0.164	-0.226	0.05*
		-15.2	0.078*	-0.062*	0	-0.164	-0.146	-0.17	-0.164	-0.226	0.05*
		-15.1	0.078*	-0.062*	0	-0.164	-0.146	-0.17	-0.164	-0.226	0.05*
		-15	0.078*	-0.062*	0	-0.164	-0.146	-0.17	-0.164	-0.326	0.05*
		-14.9	-0.022*	-0.062*	0	-0.164	-0.146	-0.07	-0.164	-0.326	0.05*
		-14.8	-0.022*	-0.062*	0	-0.164	-0.146	-0.07	-0.164	-0.326	0.05*
		-14.7	-0.022*	-0.062*	0	-0.164	-0.146	-0.07	-0.164	-0.226	0.15*
		-14.6	0.078*	0.038*	0	-0.164	-0.146	-0.07	-0.064	-0.126	0.15*
		-14.5	0.078*	0.038*	0	-0.164	-0.146	-0.07	-0.064	-0.126	0.25*
		-14.4	0.078*	0.038*	0	-0.164	-0.146	-0.07	-0.064	-0.126	0.25*
		-14.3	0.078*	0.038*	0	-0.164	-0.046	0.03	-0.064	-0.126	0.15*
		-14.2	0.078*	0.038*	0	-0.164	-0.046	0.03	-0.064	-0.126	0.15*
		-14.1	0.078*	0.038*	0	-0.164	-0.046	0.03	-0.064	-0.126	0.15*
		-14	-0.022*	-0.062*	0	-0.164	-0.046	0.03	-0.064	-0.126	0.15*
		-13.9	-0.022*	-0.062*	0	-0.164	-0.046	0.03	-0.064	-0.126	0.15*
		-13.8	-0.022*	0.038*	0	-0.164	-0.046	0.03	-0.064	-0.126	0.15*
		-13.7	-0.022*	0.038*	-0.1	-0.164	-0.046	0.03	-0.064	-0.126	0.15*
		-13.6	-0.022*	0.038*	-0.1	-0.164	-0.046	0.03	-0.064	-0.126	0.15*
		-13.5	-0.022*	0.038*	-0.1	-0.164	-0.046	0.03	-0.064	-0.126	0.15*
		-13.4	-0.022*	0.038*	0	-0.064	-0.046	0.03	-0.064	-0.126	0.15*
		-13.3	-0.022*	0.038*	0	-0.064	-0.046	0.03	-0.064	-0.126	0.15*
		-13.2	-0.022*	0.038*	0	-0.064	-0.146	-0.07	-0.064	-0.126	0.15*
		-13.1	-0.022*	-0.062*	0	-0.064	-0.146	-0.17	0.036	-0.026	0.15*
		-13	-0.022*	-0.062*	0	-0.064	-0.146	-0.17	0.036	-0.026	0.15*
		-12.9	-0.022*	-0.062*	0	-0.064	-0.146	-0.17	-0.064	-0.026	0.05*
		-12.8	-0.022*	-0.062*	0	-0.064	-0.146	-0.17	-0.064	-0.026	0.05*
		-12.7	-0.022*	-0.062*	0	-0.064	-0.046	-0.17	-0.064	-0.026	0.15*
		-12.6	-0.022*	-0.062*	0	-0.064	0.054	-0.07	-0.064	-0.026	0.15*
		-12.5	-0.022*	-0.062*	0	-0.064	-0.046	-0.07	-0.064	-0.026	0.15*
		-12.4	-0.022*	-0.062*	0	-0.064	0.054	-0.07	-0.064	-0.026	0.15*
		-12.3	-0.022*	-0.062*	0	-0.064	0.054	-0.07	-0.064	-0.026	0.15*
		-12.2	0.078*	0.038*	-0.1	-0.164	-0.046	-0.07	-0.064	-0.026	0.15*
		-12.1	-0.022*	-0.062*	-0.1	-0.164	-0.146	-0.07	0.036	0.074	0.15*
		-12	-0.022*	-0.062*	-0.1	-0.164	-0.146	-0.07	0.036	0.074	0.15*
		-11.9	-0.022*	-0.062*	-0.1	-0.164	-0.146	-0.07	0.036	-0.126	0.15*
		-11.8	0.078*	0.038*	-0.1	-0.164	-0.146	-0.07	0.036	-0.126	0.15*
		-11.7	0.078*	0.038*	0	-0.064	-0.146	-0.07	0.036	-0.126	0.15*
		-11.6	0.078*	0.038*	0	-0.064	-0.146	-0.07	0.036	-0.126	0.15*
		-11.5	0.078*	0.038*	0	-0.064	-0.146	-0.07	0.036	-0.126	0.15*
		-11.4	0.078*	0.038*	0	-0.164	-0.146	-0.07	0.036	-0.126	0.15*
		-11.3	0.078*	0.038*	0	-0.164	-0.146	-0.07	0.036	-0.126	0.05*
		-11.2	0.078*	0.038*	0	-0.164	-0.146	-0.17	0.036	-0.126	0.05*
		-11.1	0.078*	0.038*	0	-0.164	-0.046	-0.07	0.036	-0.126	0.05*
		-11	0.078*	-0.062*	0	-0.164	-0.046	-0.07	0.036	-0.126	0.05*
		-10.9	0.078*	-0.062*	0	-0.164	-0.046	-0.07	0.036	-0.126	0.05*
		-10.8	0.078*	-0.062*	-0.1	-0.164	-0.046	-0.07	0.036	-0.126	0.05*
		-10.7	0.078*	-0.062*	-0.1	-0.164	-0.046	0.03	0.036	-0.126	0.05*
		-10.6	0.078*	-0.062*	-0.1	-0.164	-0.046	0.03	0.036	-0.126	0.05*
		-10.5	0.078*	-0.062*	-0.1	-0.064	-0.046	0.03	0.036	-0.126	0.05*
		-10.4	0.078*	-0.062*	-0.1	-0.164	-0.046	0.03	0.036	-0.126	-0.05*
		-10.3	-0.022*	-0.062*	0	0.036	-0.046	0.03	-0.064	-0.026	-0.05*
		-10.2	-0.022*	-0.062*	0	0.036	-0.046	0.03	-0.064	-0.026	-0.05*
		-10.1	0.078*	-0.062*	0	0.036	-0.046	0.03	-0.064	-0.026	-0.05*
		-10	-0.022*	-0.062*	0	0.036	-0.046	0.03	-0.064	-0.026	-0.05*
		-9.9	-0.022*	-0.062*	0	0.036	-0.046	0.03	-0.064	-0.026	-0.05*
		-9.8	-0.022*	-0.062*	0	0.036	-0.046	0.03	0.036	0.074	-0.05*
		-9.7	-0.022*	0.038*	0	0.036	-0.046	0.03	0.036	0.074	-0.05*
		-9.6	-0.022*	0.038*	0	0.036	-0.046	0.03	-0.064	-0.026	-0.05*
		-9.5	-0.022*	0.038*	0	0.036	-0.146	-0.07	-0.064	-0.026	-0.05*
		-9.4	-0.022*	0.038*	0	0.036	-0.146	-0.07	-0.064	-0.026	-0.05*
		-9.3	-0.022*	0.038*	0	0.036	-0.046	0.03	-0.064	-0.026	-0.05*
		-9.2	-0.022*	0.038*	0	0.036	-0.046	0.03	-0.064	-0.026	-0.15*
		-9.1	-0.022*	0.038*	0	0.036	-0.046	0.03	-0.064	-0.026	-0.15*
		-9	-0.022*	0.038*	0	0.036	-0.046	0.03	-0.064	-0.026	-0.15*
		-8.9	-0.022*	0.038*	0	0.036	-0.046	0.03	-0.064	-0.026	-0.15*
		-8.8	-0.022*	0.038*	0.1	0.136	-0.046	0.03	-0.064	-0.026	-0.15*
		-8.7	-0.022*	0.038*	0.1	0.136	-0.046	0.03	-0.064	-0.026	-0.15*
		-8.6	-0.022*	0.038*	0	-0.064	-0.046	0.03	-0.064	-0.026	-0.15*
		-8.5	-0.022*	0.038*	0	-0.064	-0.046	0.03	-0.064	-0.026	-0.05*
		-8.4	-0.022*	0.038*	0	-0.064	-0.046	0.03	0.036	0.074	-0.05*
		-8.3	-0.022*	0.038*	-0.1	-0.064	-0.046	0.03	0.036	0.074	-0.05*
		-8.2	-0.022*	0.038*	0	-0.064	-0.046	0.03	0.036	0.074	-0.05*
		-8.1	-0.022*	0.038*	0	-0.064	-0.046	-0.07	0.036	0.074	0.05*
		-8	-0.022*	0.038*	0	-0.064	-0.046	-0.07	0.036	0.074	0.05*
		-7.9	-0.022*	0.038*	0	-0.064	-0.046	-0.07	0.136	0.074	0.05*
		-7.8	-0.022*	0.038*	0	-0.064	-0.046	-0.07	0.136	0.074	0.05*
		-7.7	-0.022*	0.038*	0	-0.064	-0.046	-0.07	0.036	0.074	0.05*
		-7.6	-0.022*	-0.062*	0	-0.064	0.054	-0.07	0.036	0.074	-0.05*
		-7.5	-0.022*	0.038*	0	-0.064	0.054	-0.07	0.036	0.074	-0.05*
		-7.4	-0.022*	-0.062*	0	-0.064	0.054	-0.07	0.036	0.074	-0.05*
		-7.3	-0.022*	-0.062*	0	-0.064	0.054	-0.07	0.036	0.074	-0.05*
		-7.2	-0.022*	-0.062*	0	-0.064	0.054	-0.07	0.036	0.074	-0.05*
		-7.1	-0.022*	-0.062*	0	-0.064	0.054	-0.07	0.036	0.074	-0.05*
		-7	-0.022*	-0.062*	0	-0.064	0.054	-0.07	0.036	-0.026	-0.05*
		-6.9	-0.022*	-0.062*	0	-0.064	0.054	-0.07	0.036	-0.026	-0.05*
		-6.8	-0.022*	-0.062*	0	-0.064	0.054	-0.07	0.036	-0.026	-0.05*
		-6.7	-0.022*	-0.062*	0	-0.064	0.054	0.03	-0.064	-0.126	-0.05*
		-6.6	-0.022*	-0.062*	-0.1	-0.064	0.054	0.03	-0.064	-0.126	0.05*
		-6.5	-0.022*	-0.062*	0	0.036	0.054	0.03	-0.064	-0.126	0.05*
		-6.4	-0.022*	-0.062*	0	0.036	0.054	0.03	0.036	-0.026	0.05*
		-6.3	-0.022*	-0.062*	0	0.036	0.054	0.03	0.036	-0.026	0.05*
		-6.2	-0.022*	-0.062*	0	0.036	0.054	0.03	0.036	-0.026	0.05*
		-6.1	0.078*	0.038*	0	0.036	0.054	0.03	0.036	-0.026	0.15*
		-6	0.078*	0.038*	0	0.036	0.054	0.03	0.036	-0.026	0.15*
		-5.9	0.078*	0.038*	0	0.036	0.054	0.03	0.036	-0.026	0.15*
		-5.8	0.078*	0.038*	0	0.036	0.054	0.03	0.036	-0.026	0.15*
		-5.7	0.078*	0.038*	0	0.036	0.054	0.03	0.036	-0.026	0.15*
		-5.6	0.078*	-0.062*	0	0.036	0.054	0.03	0.036	-0.026	0.15*
		-5.5	0.078*	-0.062*	0	0.036	0.054	0.03	0.036	-0.026	0.15*
		-5.4	0.078*	0.038*	0	0.036	0.054	0.03	0.036	-0.026	0.15*
		-5.3	0.078*	0.038*	0	0.036	0.054	0.03	-0.064	-0.026	0.15*
		-5.2	0.078*	0.038*	0	0.136	-0.046	0.03	-0.064	-0.026	0.15*
		-5.1	0.078*	0.038*	0	0.036	0.054	0.13	-0.064	-0.026	0.15*
		-5	0.078*	0.038*	0	0.136	0.054	0.13	-0.064	-0.026	0.15*
		-4.9	0.078*	0.038*	0	0.036	0.054	0.13	-0.064	-0.026	0.15*
		-4.8	0.078*	0.038*	0	0.036	0.054	0.13	-0.064	-0.026	0.15*
		-4.7	0.078*	0.038*	0	0.036	0.054	0.13	-0.064	-0.026	0.15*
		-4.6	0.078*	0.038*	0	0.036	0.054	0.03	-0.064	-0.026	0.15*
		-4.5	0.078*	0.038*	0	0.036	0.054	0.03	-0.064	-0.026	0.15*
		-4.4	0.078*	0.038*	0	0.136	0.054	0.03	-0.064	-0.026	0.15*
		-4.3	0.078*	-0.062*	0	0.136	0.054	0.03	-0.064	-0.026	0.15*
		-4.2	0.078*	-0.062*	0	0.136	0.054	0.03	-0.064	-0.026	0.05*
		-4.1	-0.022*	-0.062*	0	0.136	0.054	0.03	-0.064	-0.026	0.05*
		-4	0.078*	0.038*	0	0.136	0.054	0.03	-0.064	-0.026	0.15*
		-3.9	0.078*	0.038*	0	0.136	0.054	0.03	-0.064	-0.026	0.25*
		-3.8	0.078*	0.038*	0	0.136	0.054	-0.07	-0.064	-0.026	0.25*
		-3.7	0.078*	0.038*	0	0.136	0.054	-0.07	-0.064	-0.026	0.25*
		-3.6	0.078*	0.038*	0	0.136	0.054	-0.07	-0.064	-0.126	0.25*
		-3.5	0.078*	0.038*	0	0.136	0.054	0.03	-0.064	-0.126	0.25*
		-3.4	0.078*	0.038*	0	0.136	0.054	0.03	-0.064	-0.226	0.25*
		-3.3	0.078*	0.038*	0	0.136	0.054	0.03	-0.064	-0.226	0.25*
		-3.2	0.078*	-0.062*	0	0.136	0.054	0.03	-0.064	-0.226	0.25*
		-3.1	0.078*	-0.062*	0	0.136	0.054	0.03	0.036	-0.126	0.25*
		-3	0.078*	-0.062*	0	0.136	0.054	0.03	0.036	-0.126	0.25*
		-2.9	0.078*	-0.062*	0	0.136	0.054	0.03	0.036	-0.126	0.25*
		-2.8	0.078*	-0.062*	0	0.136	0.054	0.03	0.036	-0.126	0.25*
		-2.7	0.078*	-0.062*	0	0.136	0.054	0.03	0.036	-0.126	0.25*
		-2.6	-0.022*	-0.062*	-0.1	0.136	0.054	0.03	0.036	-0.126	0.15*
		-2.5	-0.022*	-0.062*	-0.1	0.136	0.054	0.03	0.036	-0.126	0.15*
		-2.4	0.078*	0.038*	-0.1	0.136	0.054	0.03	0.036	-0.126	0.15*
		-2.3	0.078*	0.038*	0	0.236	-0.046	0.03	0.036	-0.126	0.15*
		-2.2	0.078*	0.038*	0	0.236	-0.046	0.03	-0.064	-0.126	0.15*
		-2.1	0.078*	0.038*	-0.1	0.136	-0.046	0.03	-0.064	-0.126	0.15*
		-2	0.078*	0.038*	-0.1	0.036	-0.046	0.03	-0.064	-0.126	0.15*
		-1.9	0.078*	0.138*	-0.1	0.036	-0.046	0.03	-0.164	-0.126	0.25*
		-1.8	-0.022*	0.138*	-0.1	0.036	-0.046	-0.07	-0.064	-0.026	0.25*
		-1.7	-0.022*	0.138*	-0.2	0.036	-0.046	-0.07	0.036	-0.026	0.25*
		-1.6	-0.022*	0.138*	-0.2	0.036	-0.046	-0.07	0.036	-0.126	0.25*
		-1.5	-0.022*	0.138*	-0.2	0.036	-0.046	-0.07	-0.064	-0.126	0.25*
		-1.4	-0.022*	0.138*	-0.2	-0.064	0.054	0.03	-0.064	-0.126	0.35*
		-1.3	-0.122*	0.138*	-0.2	-0.064	0.054	0.03	0.036	-0.026	0.35*
		-1.2	-0.122*	0.138*	-0.1	-0.064	-0.146	-0.07	-0.064	-0.126	0.25*
		-1.1	-0.122*	0.138*	0.2	0.136	-0.046	0.03	-0.064	-0.126	0.25*
		-1	-0.022*	0.038*	-0.2	0.036	0.054	0.03	0.236	0.274	0.25*
		-0.9	-0.522*	-0.262*	-1	-1.164	-0.646	-0.67	0.036	-0.026	0.15*
		-0.8	-2.722*	-2.562*	-1.1	-1.564	-2.946	-2.37	-1.264	-1.826	0.95*
		-0.7	-1.022*	-1.862*	-0.3	-0.564	-2.046	-0.87	-0.664	-0.926	0.35*
		-0.6	-0.722*	-0.962*	-0.2	-0.264	-0.846	-0.47	-0.164	-0.226	0.25*
		-0.5	-0.122*	-0.462*	-0.1	0.136	-0.446	-0.37	0.136	0.074	0.25*
		-0.4	0.078*	-0.062*	-0.1	0.236	-0.246	-0.17	-0.164	-0.126	0.15*
		-0.3	0.078*	-0.162*	0.1	0.436	-0.246	0.03	0.336	0.474	0.15*
		-0.2	0.678*	0.438*	0.1	0.436	0.354	0.43	-0.064	0.274	0.05*
		-0.1	0.578*	0.638*	0.2	0.136	0.654	0.53	0.836	0.674	-0.55*
		0	1.178*	1.338*	-0.6	-0.364	1.754	2.23	1.636	1.574	-2.15*
		0.1	2.978*	3.538*	-0.3	-0.164	3.754	3.63	3.036	3.174	-3.15*
		0.2	3.778*	3.838*	0.2	0.436	4.054	3.63	3.036	3.174	-3.75*
		0.3	3.378*	3.538*	-0.2	-0.164	3.754	3.43	3.136	3.074	-2.75*
		0.4	2.078*	2.438*	-0.3	-0.364	2.454	2.43	3.036	3.174	-2.55*
		0.5	1.878*	2.038*	-0.1	0.136	2.154	2.23	2.936	3.574	-1.55*
		0.6	1.378*	1.238*	-0.2	-0.364	1.654	2.03	2.536	3.474	-1.25*
		0.7	1.278*	1.138*	0.2	0.136	1.454	2.03	2.836	3.974	-0.75*
		0.8	0.978*	1.138*	-0.1	0.136	1.754	1.83	2.636	4.374	-0.55*
		0.9	0.678*	1.038*	0.1	0.336	1.654	2.13	2.836	4.574	-0.65*
		1	0.578*	0.738*	0.3	0.436	1.754	2.13	3.136	5.274	-0.45*
		1.1	0.478*	1.338*	0.2	0.536	1.554	2.23	3.736	5.574	-0.05*
		1.2	0.578*	1.038*	0.1	0.636	1.554	2.63	4.136	6.374	-0.35*
		1.3	0.378*	0.938*	0.3	0.536	1.754	2.53	4.336	6.674	0.05*
		1.4	0.678*	1.038*	0.4	0.636	1.954	2.73	4.436	6.774	-0.05*
		1.5	0.578*	1.138*	0.6	0.936	1.954	2.73	4.536	6.974	-0.05*
		1.6	0.378*	0.938*	0.5	0.936	2.154	2.93	4.736	7.474	-0.05*
		1.7	0.378*	0.838*	0.5	0.936	1.954	3.13	4.936	7.774	0.05*
		1.8	0.478*	0.938*	0.5	1.036	1.854	3.03	5.136	8.074	0.15*
		1.9	0.478*	0.838*	0.4	1.036	1.854	3.13	5.336	8.474	0.25*
		2	0.578*	0.938*	0.4	1.036	1.954	3.23	5.536	8.774	0.15*
		2.1	0.578*	0.938*	0.5	1.036	2.054	3.23	5.636	8.874	0.35*
		2.2	0.578*	1.038*	0.5	1.036	2.154	3.33	5.736	9.074	0.35*
		2.3	0.478*	0.838*	0.6	1.036	2.254	3.53	6.036	9.274	0.35*
		2.4	0.478*	0.838*	0.7	1.136	2.254	3.63	6.236	9.574	0.35*
		2.5	0.578*	0.738*	0.6	1.036	2.354	3.83	6.436	9.874	0.35*
		2.6	0.478*	0.538*	0.6	1.036	2.254	3.83	6.636	9.974	0.35*
		2.7	0.378*	0.538*	0.6	1.236	2.354	3.93	6.836	10.174	0.35*
		2.8	0.378*	0.638*	0.6	1.236	2.354	4.13	7.036	10.374	0.35*
		2.9	0.378*	0.738*	0.6	1.336	2.554	4.23	7.136	10.574	0.45*
		3	0.478*	0.738*	0.7	1.436	2.554	4.23	7.236	10.874	0.35*
		3.1	0.378*	0.738*	0.7	1.336	2.654	4.43	7.436	11.074	0.35*
		3.2	0.378*	0.638*	0.7	1.336	2.654	4.43	7.636	11.274	0.55*
		3.3	0.378*	0.738*	0.7	1.436	2.754	4.53	7.736	11.574	0.55*
		3.4	0.378*	0.738*	0.6	1.336	2.854	4.63	7.736	11.574	0.55*
		3.5	0.378*	0.738*	0.7	1.536	2.854	4.73	8.036	11.774	0.65*
		3.6	0.378*	0.638*	0.7	1.436	2.954	4.83	8.136	11.774	0.65*
		3.7	0.378*	0.738*	0.7	1.536	2.854	4.83	8.336	11.974	0.45*
		3.8	0.278*	0.638*	0.7	1.536	2.954	4.93	8.636	12.074	0.45*
		3.9	0.278*	0.638*	0.8	1.536	3.154	5.13	8.736	12.174	0.55*
		4	0.278*	0.738*	0.7	1.536	3.154	5.23	8.936	12.374	0.55*
		4.1	0.378*	0.738*	0.8	1.736	3.154	5.23	9.036	12.474	0.55*
		4.2	0.378*	0.738*	0.8	1.736	3.154	5.33	9.136	12.574	0.45*
		4.3	0.378*	0.638*	0.9	1.836	3.254	5.43	9.236	12.674	0.45*
		4.4	0.378*	0.638*	0.9	1.836	3.254	5.53	9.336	12.774	0.45*
		4.5	0.378*	0.638*	0.9	1.936	3.354	5.53	9.536	12.874	0.45*
		4.6	0.478*	0.838*	0.9	1.936	3.454	5.73	9.736	13.074	0.45*
		4.7	0.478*	0.738*	0.9	1.936	3.554	5.93	9.636	13.074	0.45*
		4.8	0.378*	0.738*	1	1.936	3.654	6.03	9.836	13.274	0.45*
		4.9	0.378*	0.738*	1	2.036	3.754	6.13	9.836	13.274	0.45*
		5	0.578*	0.738*	1	2.036	3.754	6.13	9.936	13.274	0.55*
		5.1	0.378*	0.738*	0.9	1.936	3.754	6.23	10.036	13.474	0.55*
		5.2	0.378*	0.738*	1	1.936	3.954	6.43	10.236	13.574	0.55*
		5.3	0.478*	0.938*	1	1.936	4.054	6.43	10.236	13.574	0.65*
		5.4	0.378*	0.838*	1	2.036	3.954	6.43	10.336	13.674	0.65*
		5.5	0.378*	0.738*	1.1	2.036	4.054	6.63	10.436	13.674	0.65*
		5.6	0.578*	0.838*	1.1	2.136	4.054	6.53	10.636	13.774	0.75*
		5.7	0.478*	0.838*	1	2.036	4.054	6.63	10.636	13.774	0.65*
		5.8	0.578*	0.838*	1.1	2.136	4.154	6.83	10.736	13.874	0.85*
		5.9	0.378*	0.838*	1	2.136	4.154	6.73	10.936	13.974	0.75*
		6	0.578*	0.938*	1.2	2.236	4.154	6.93	10.736	13.874	0.75*
		6.1	0.478*	0.838*	1	2.236	4.254	6.93	10.936	13.974	0.75*
		6.2	0.578*	0.938*	1.2	2.336	4.254	7.03	10.936	14.074	0.75*
		6.3	0.578*	0.738*	1.1	2.336	4.354	7.13	11.036	14.074	0.75*
		6.4	0.478*	0.838*	1.3	2.536	4.354	7.13	11.136	14.174	0.65*
		6.5	0.578*	0.838*	1.2	2.436	4.454	7.33	11.136	14.274	0.85*
		6.6	0.678*	0.838*	1.3	2.536	4.554	7.33	11.336	14.274	0.85*
		6.7	0.478*	0.838*	1.3	2.536	4.554	7.43	11.336	14.274	0.75*
		6.8	0.478*	0.838*	1.3	2.636	4.654	7.63	11.536	14.374	0.85*
		6.9	0.478*	0.838*	1.3	2.536	4.654	7.63	11.536	14.474	0.85*
		7	0.478*	0.838*	1.2	2.536	4.654	7.73	11.736	14.474	0.85*
		7.1	0.578*	0.938*	1.4	2.636	4.754	7.83	11.736	14.574	0.85*
		7.2	0.478*	0.838*	1.5	2.736	4.754	7.73	11.736	14.574	0.85*
		7.3	0.478*	0.738*	1.3	2.736	4.854	7.93	11.936	14.674	0.75*
		7.4	0.478*	0.938*	1.5	2.836	4.754	7.83	11.936	14.674	0.85*
		7.5	0.478*	0.838*	1.5	2.836	4.854	7.93	12.036	14.674	0.85*
		7.6	0.478*	0.838*	1.5	2.836	4.954	8.13	12.036	14.674	0.85*
		7.7	0.478*	0.838*	1.5	2.936	4.954	8.23	12.236	14.874	0.85*
		7.8	0.578*	0.938*	1.5	2.936	5.054	8.23	12.136	14.874	0.75*
		7.9	0.378*	0.738*	1.5	2.836	5.054	8.33	12.236	14.774	0.85*
		8	0.578*	0.938*	1.5	3.036	5.054	8.23	12.236	14.774	0.85*
		8.1	0.578*	0.938*	1.5	2.936	5.054	8.23	12.336	14.774	0.85*
		8.2	0.578*	0.938*	1.6	3.036	5.254	8.53	12.436	14.874	0.75*
		8.3	0.678*	0.938*	1.5	3.036	5.154	8.43	12.436	14.774	0.85*
		8.4	0.478*	0.938*	1.5	2.936	5.254	8.43	12.436	14.874	0.75*
		8.5	0.578*	0.938*	1.7	3.136	5.354	8.53	12.436	14.774	0.75*
		8.6	0.678*	1.138*	1.7	3.236	5.354	8.63	12.636	14.874	0.75*
		8.7	0.578*	0.938*	1.6	3.036	5.454	8.73	12.536	14.774	0.65*
		8.8	0.578*	1.038*	1.7	3.136	5.454	8.73	12.636	14.874	0.65*
		8.9	0.578*	0.938*	1.7	3.236	5.454	8.63	12.536	14.674	0.75*
		9	0.578*	1.038*	1.8	3.236	5.654	8.73	12.736	14.874	0.75*
		9.1	0.578*	0.938*	1.8	3.336	5.554	8.83	12.636	14.774	0.65*
		9.2	0.578*	1.038*	1.8	3.236	5.554	8.83	12.736	14.874	0.55*
		9.3	0.678*	1.038*	1.9	3.436	5.654	8.83	12.736	14.774	0.65*
		9.4	0.578*	1.138*	1.9	3.436	5.754	8.93	12.836	14.774	0.65*
		9.5	0.578*	0.938*	1.8	3.336	5.754	8.93	12.636	14.774	0.65*
		9.6	0.578*	1.038*	1.9	3.436	5.754	8.93	12.836	14.974	0.75*
		9.7	0.578*	1.138*	1.9	3.436	5.854	8.93	12.936	14.974	0.65*
		9.8	0.578*	1.138*	1.9	3.436	5.854	8.93	12.936	14.874	0.75*
		9.9	0.578*	1.038*	1.8	3.436	5.954	9.03	12.836	14.874	0.65*
		10	0.578*	1.038*	1.8	3.436	5.954	9.03	12.836	14.874	0.75*
		10.1	0.578*	1.138*	1.9	3.536	6.054	9.23	12.936	14.874	0.65*
		10.2	0.678*	1.138*	1.8	3.536	6.054	9.13	13.036	14.974	0.75*
		10.3	0.678*	1.238*	1.7	3.436	6.254	9.23	13.036	14.974	0.75*
		10.4	0.578*	1.038*	1.8	3.536	6.054	9.23	13.036	14.974	0.75*
		10.5	0.678*	1.138*	1.9	3.536	6.054	9.23	13.136	14.874	0.65*
		10.6	0.678*	1.138*	1.7	3.536	6.154	9.33	13.036	14.974	0.85*
		10.7	0.578*	1.138*	1.7	3.436	6.154	9.23	13.036	14.874	0.75*
		10.8	0.578*	1.138*	1.9	3.536	6.154	9.33	13.136	14.974	0.65*
		10.9	0.578*	1.138*	1.8	3.536	6.254	9.43	13.136	14.874	0.75*
		11	0.678*	1.238*	1.9	3.636	6.254	9.33	13.136	14.874	0.65*
		11.1	0.678*	1.238*	1.9	3.636	6.154	9.33	13.236	14.974	0.75*
		11.2	0.578*	1.138*	1.8	3.536	6.154	9.43	13.336	14.974	0.75*
		11.3	0.678*	1.138*	1.9	3.636	6.254	9.43	13.236	14.974	0.65*
		11.4	0.678*	1.338*	2	3.636	6.154	9.43	13.236	14.974	0.65*
		11.5	0.678*	1.338*	1.9	3.636	6.254	9.53	13.336	15.074	0.75*
		11.6	0.778*	1.238*	2	3.836	6.254	9.43	13.236	14.974	0.65*
		11.7	0.778*	1.338*	2	3.636	6.254	9.53	13.336	15.074	0.75*
		11.8	0.778*	1.338*	2.1	3.736	6.354	9.63	13.236	14.974	0.65*
		11.9	0.678*	1.238*	2.1	3.936	6.454	9.73	13.336	14.974	0.75*
		12	0.778*	1.338*	2.1	3.936	6.354	9.63	13.336	15.074	0.65*
		12.1	0.678*	1.238*	2.1	3.836	6.354	9.73	13.336	15.074	0.65*
		12.2	0.778*	1.338*	2.1	3.936	6.454	9.73	13.436	15.174	0.65*
		12.3	0.778*	1.238*	2.2	4.036	6.454	9.73	13.336	14.974	0.85*
		12.4	0.778*	1.338*	2.2	3.936	6.554	9.83	13.336	15.074	0.75*
		12.5	0.678*	1.238*	2.1	3.936	6.554	9.83	13.336	15.074	0.85*
		12.6	0.778*	1.138*	2.2	4.036	6.654	9.93	13.436	15.174	0.75*
		12.7	0.778*	1.338*	2.3	4.136	6.554	9.93	13.536	15.074	0.75*
		12.8	0.778*	1.338*	2.2	4.136	6.654	9.93	13.436	15.074	0.75*
		12.9	0.778*	1.438*	2.2	4.136	6.754	9.93	13.636	15.174	0.75*
		13	0.878*	1.338*	2.3	4.236	6.654	10.03	13.536	15.074	0.75*
		13.1	0.778*	1.238*	2.3	4.236	6.854	10.03	13.636	15.074	0.65*
		13.2	0.678*	1.338*	2.2	4.136	6.754	10.03	13.536	15.074	0.75*
		13.3	0.778*	1.438*	2.3	4.136	6.754	10.03	13.536	15.174	0.85*
		13.4	0.778*	1.338*	2.3	4.236	6.754	10.03	13.636	15.174	0.85*
		13.5	0.878*	1.438*	2.3	4.236	6.854	10.13	13.536	14.974	0.85*
		13.6	0.778*	1.438*	2.4	4.336	6.854	10.13	13.536	15.174	0.85*
		13.7	0.678*	1.338*	2.4	4.336	6.854	10.23	13.636	15.174	0.95*
		13.8	0.778*	1.438*	2.3	4.336	6.954	10.13	13.636	15.174	0.75*
		13.9	0.878*	1.438*	2.3	4.336	6.854	10.13	13.636	15.174	0.75*
		14	0.878*	1.538*	2.3	4.236	6.854	10.13	13.736	15.174	0.75*
		14.1	0.878*	1.438*	2.3	4.336	6.854	10.13	13.636	15.174	0.75*
		14.2	0.878*	1.438*	2.3	4.336	6.954	10.23	13.636	15.174	0.85*
		14.3	0.778*	1.338*	2.4	4.336	6.954	10.23	13.736	15.174	0.85*
		14.4	0.778*	1.438*	2.3	4.436	7.054	10.23	13.736	15.074	0.85*
		14.5	0.778*	1.438*	2.3	4.336	7.054	10.23	13.636	15.174	0.95*
		14.6	0.778*	1.438*	2.4	4.336	7.054	10.33	13.636	15.074	0.95*
		14.7	0.778*	1.438*	2.3	4.336	7.054	10.33	13.636	15.074	0.85*
		14.8	0.778*	1.438*	2.4	4.336	6.954	10.33	13.736	15.174	0.85*
		14.9	0.878*	1.438*	2.4	4.436	7.054	10.33	13.836	15.274	0.85*
		15	0.778*	1.438*	2.4	4.436	7.054	10.33	13.836	15.274	0.85*
		15.1	0.778*	1.438*	2.5	4.436	7.154	10.33	13.836	15.174	0.95*
		15.2	0.778*	1.438*	2.5	4.536	7.154	10.33	13.936	15.174	0.95*
		15.3	0.778*	1.438*	2.5	4.536	7.254	10.43	13.936	15.274	0.95*
		15.4	0.878*	1.438*	2.3	4.336	7.254	10.43	13.836	15.274	1.05*
		15.5	0.878*	1.438*	2.4	4.336	7.354	10.53	13.936	15.274	0.95*
		15.6	0.778*	1.338*	2.4	4.436	7.154	10.43	13.936	15.274	0.95*
		15.7	0.678*	1.338*	2.5	4.436	7.254	10.63	13.936	15.174	0.95*
		15.8	0.778*	1.438*	2.5	4.536	7.354	10.53	14.036	15.274	0.95*
		15.9	0.878*	1.438*	2.5	4.536	7.354	10.63	13.936	15.174	0.95*
		16	0.678*	1.338*	2.5	4.436	7.454	10.63	13.936	15.174	0.95*
		16.1	0.678*	1.338*	2.5	4.536	7.454	10.63	13.936	15.174	0.95*
		16.2	0.678*	1.438*	2.5	4.536	7.454	10.73	13.936	15.174	1.05*
		16.3	0.778*	1.438*	2.6	4.636	7.554	10.73	13.936	15.274	1.05*
		16.4	0.778*	1.438*	2.6	4.636	7.554	10.83	14.036	15.274	1.05*
		16.5	0.778*	1.538*	2.6	4.736	7.454	10.63	14.036	15.274	0.95*
		16.6	0.778*	1.538*	2.6	4.636	7.454	10.73	13.936	15.174	0.95*
		16.7	0.678*	1.438*	2.6	4.636	7.454	10.73	13.936	15.174	0.95*
		16.8	0.678*	1.538*	2.6	4.636	7.554	10.83	14.036	15.174	0.95*
		16.9	0.778*	1.538*	2.6	4.636	7.554	10.83	14.036	15.274	0.95*
		17	0.778*	1.538*	2.7	4.736	7.654	10.83	14.036	15.274	0.95*
		17.1	0.778*	1.538*	2.7	4.736	7.654	10.93	14.136	15.274	1.05*
		17.2	0.778*	1.638*	2.6	4.736	7.654	10.93	14.136	15.274	0.95*
		17.3	0.778*	1.538*	2.7	4.836	7.754	11.03	14.136	15.374	0.95*
		17.4	0.778*	1.538*	2.7	4.736	7.754	10.93	13.836	15.174	1.05*
		17.5	0.778*	1.638*	2.7	4.836	7.754	10.93	13.936	15.174	1.05*
		17.6	0.778*	1.638*	2.7	4.836	7.754	10.93	13.936	15.174	1.05*
		17.7	0.778*	1.638*	2.7	4.836	7.654	10.93	13.936	15.174	1.05*
		17.8	0.878*	1.638*	2.7	4.936	7.754	10.93	13.936	15.274	1.05*
		17.9	0.778*	1.538*	2.7	4.936	7.754	10.93	13.936	15.174	1.05*
		18	0.778*	1.638*	2.7	4.936	7.854	11.03	13.936	15.174	1.05*
		18.1	0.778*	1.638*	2.6	4.836	7.754	11.03	13.936	15.174	1.05*
		18.2	0.778*	1.638*	2.7	4.936	7.654	11.03	13.936	15.174	1.05*
		18.3	0.878*	1.638*	2.7	4.936	7.754	11.03	14.036	15.074	1.15*
		18.4	0.878*	1.738*	2.7	4.936	7.754	11.03	14.036	15.274	1.15*
		18.5	0.878*	1.738*	2.7	5.036	7.754	11.03	13.936	15.174	1.05*
		18.6	0.878*	1.738*	2.8	5.036	7.854	11.13	13.936	15.174	1.05*
		18.7	0.978*	1.738*	2.8	5.036	7.854	11.13	14.036	15.174	1.05*
		18.8	0.878*	1.638*	2.8	5.136	7.854	11.13	14.036	15.274	1.15*
		18.9	0.878*	1.738*	2.8	5.136	7.754	11.03	14.036	15.274	1.15*
		19	0.878*	1.738*	2.7	4.936	7.854	11.13	13.936	15.174	1.15*
		19.1	0.878*	1.738*	2.7	5.036	7.854	11.13	13.936	15.074	1.15*
		19.2	0.978*	1.738*	2.7	5.036	7.854	11.23	13.936	15.174	1.15*
		19.3	0.978*	1.838*	2.7	5.036	7.954	11.23	13.936	15.074	1.15*
		19.4	0.878*	1.738*	2.8	5.136	7.954	11.23	13.936	15.074	1.05*
		19.5	0.778*	1.638*	2.8	5.036	7.954	11.13	13.836	15.074	1.05*
		19.6	0.878*	1.638*	2.8	5.036	7.954	11.23	13.936	15.074	1.15*
		19.7	0.878*	1.738*	2.7	4.936	7.954	11.23	13.836	15.074	1.15*
		19.8	0.778*	1.638*	2.7	5.036	8.054	11.23	13.836	15.174	1.05*
		19.9	0.778*	1.638*	2.8	5.036	8.054	11.23	13.936	15.174	1.05*
		20	0.778*	1.638*	2.8	5.036	8.054	11.23	13.936	15.174	1.05*
		20.1	0.878*	1.638*	2.8	5.136	7.954	11.23	13.936	15.174	1.15*
		20.2	0.878*	1.738*	2.9	5.136	8.054	11.23	13.936	15.274	1.15*
		20.3	0.778*	1.638*	2.9	5.136	8.054	11.23	13.936	15.174	1.15*
		20.4	0.778*	1.638*	2.9	5.136	8.054	11.23	13.936	15.174	1.15*
		20.5	0.778*	1.638*	2.9	5.136	8.154	11.33	13.936	15.174	1.15*
		20.6	0.878*	1.738*	2.8	5.136	8.154	11.33	13.936	15.174	1.15*
		20.7	0.878*	1.738*	2.9	5.136	8.154	11.33	14.036	15.174	1.15*
		20.8	0.878*	1.738*	2.9	5.136	8.054	11.23	14.036	15.174	1.05*
		20.9	0.778*	1.638*	2.9	5.236	8.154	11.23	13.936	15.074	1.15*
		21	0.778*	1.738*	2.9	5.236	8.154	11.33	13.936	15.074	1.15*
		21.1	0.878*	1.738*	3	5.236	8.154	11.33	13.936	15.174	1.15*
		21.2	0.878*	1.738*	3	5.236	8.254	11.33	13.936	15.174	1.05*
		21.3	0.878*	1.738*	3	5.336	8.254	11.43	14.036	15.174	1.05*
		21.4	0.778*	1.638*	3	5.336	8.254	11.43	14.036	15.174	1.05*
		21.5	0.778*	1.738*	3	5.236	8.254	11.33	13.936	15.074	1.15*
		21.6	0.778*	1.738*	3	5.236	8.254	11.23	13.936	14.974	1.15*
		21.7	0.778*	1.738*	3	5.236	8.254	11.23	13.936	15.074	1.05*
		21.8	0.878*	1.738*	3	5.336	8.254	11.43	14.036	15.074	1.05*
		21.9	0.878*	1.838*	3.1	5.336	8.354	11.43	14.036	15.074	1.15*
		22	0.878*	1.838*	3.1	5.336	8.354	11.43	14.036	15.074	1.15*
		22.1	0.778*	1.738*	3	5.336	8.254	11.43	14.036	15.074	1.15*
		22.2	0.878*	1.738*	3	5.336	8.354	11.53	14.036	15.074	1.15*
		22.3	0.878*	1.738*	3	5.336	8.354	11.53	14.036	15.074	1.15*
		22.4	0.878*	1.838*	3	5.336	8.254	11.43	14.036	15.074	1.25*
		22.5	0.878*	1.838*	3	5.436	8.354	11.43	13.936	15.074	1.25*
		22.6	0.878*	1.838*	3.1	5.436	8.354	11.33	13.936	15.074	1.15*
		22.7	0.778*	1.738*	3	5.336	8.354	11.43	13.936	15.074	1.15*
		22.8	0.878*	1.738*	3	5.336	8.454	11.43	13.936	14.974	1.15*
		22.9	0.878*	1.838*	3	5.436	8.454	11.43	13.936	15.074	1.15*
		23	0.878*	1.738*	3.1	5.436	8.354	11.33	13.936	15.074	1.25*
		23.1	0.878*	1.738*	3.1	5.436	8.454	11.43	13.936	15.074	1.25*
		23.2	0.878*	1.738*	3.1	5.436	8.454	11.43	13.936	15.074	1.15*
		23.3	0.878*	1.738*	3.1	5.536	8.454	11.43	14.036	14.974	1.15*
		23.4	0.778*	1.738*	3.2	5.536	8.554	11.43	14.036	15.074	1.25*
		23.5	0.878*	1.738*	3.2	5.536	8.554	11.53	13.936	14.974	1.25*
		23.6	0.878*	1.738*	3.1	5.436	8.454	11.43	13.936	14.974	1.25*
		23.7	0.878*	1.738*	3.1	5.536	8.554	11.43	13.936	14.974	1.25*
		23.8	0.878*	1.838*	3.2	5.536	8.554	11.43	13.936	14.974	1.25*
		23.9	0.878*	1.838*	3.2	5.536	8.554	11.53	14.036	14.974	1.25*
		24	0.878*	1.738*	3.2	5.536	8.554	11.53	14.036	15.074	1.25*
		24.1	0.878*	1.738*	3.3	5.636	8.654	11.53	13.936	14.974	1.25*
		24.2	0.878*	1.738*	3.2	5.536	8.654	11.53	13.936	14.974	1.25*
		24.3	0.878*	1.838*	3.2	5.436	8.554	11.53	13.936	14.974	1.15*
		24.4	0.878*	1.838*	3.2	5.436	8.654	11.53	13.936	15.074	1.15*
		24.5	0.878*	1.838*	3.3	5.536	8.654	11.53	13.936	15.074	1.25*
		24.6	0.878*	1.838*	3.3	5.536	8.654	11.53	13.936	15.074	1.15*
		24.7	0.878*	1.838*	3.3	5.536	8.754	11.53	14.036	15.074	1.15*
		24.8	0.778*	1.738*	3.3	5.636	8.654	11.53	13.936	14.974	1.15*
		24.9	0.778*	1.738*	3.3	5.636	8.654	11.53	13.936	15.074	1.15*
		25	0.778*	1.838*	3.3	5.536	8.654	11.53	13.936	15.074	1.25*
		25.1	0.778*	1.838*	3.3	5.536	8.754	11.53	13.936	14.974	1.35*
		25.2	0.878*	1.838*	3.3	5.736	8.754	11.53	13.936	14.974	1.15*
		25.3	0.878*	1.838*	3.3	5.736	8.754	11.63	13.936	14.974	1.15*
		25.4	0.878*	1.838*	3.4	5.736	8.654	11.53	14.036	15.074	1.15*
		25.5	0.878*	1.938*	3.4	5.736	8.754	11.53	14.036	15.074	1.25*
		25.6	0.878*	1.938*	3.3	5.736	8.754	11.63	13.936	14.974	1.35*
		25.7	0.878*	1.938*	3.3	5.736	8.754	11.63	13.936	14.974	1.35*
		25.8	0.978*	1.938*	3.3	5.736	8.754	11.63	13.936	14.974	1.35*
		25.9	0.878*	1.838*	3.4	5.836	8.654	11.53	13.936	14.974	1.25*
		26	0.878*	1.838*	3.4	5.836	8.754	11.53	13.936	15.074	1.25*
		26.1	0.878*	1.938*	3.4	5.836	8.754	11.63	13.936	15.074	1.35*
		26.2	0.878*	1.938*	3.3	5.736	8.754	11.63	13.936	15.074	1.35*
		26.3	0.878*	1.938*	3.3	5.836	8.754	11.63	14.036	15.074	1.35*
		26.4	0.878*	1.938*	3.4	5.836	8.854	11.63	14.136	15.174	1.35*
		26.5	0.978*	1.938*	3.4	5.836	8.854	11.73	14.036	15.074	1.35*
		26.6	0.978*	1.938*	3.4	5.836	8.754	11.63	13.936	14.974	1.35*
		26.7	0.978*	1.938*	3.4	5.836	8.854	11.73	14.036	15.174	1.25*
		26.8	0.978*	2.138*	3.3	5.836	8.954	11.73	14.036	15.174	1.25*
		26.9	0.878*	2.038*	3.3	5.836	8.954	11.73	14.036	15.174	1.25*
		27	0.878*	2.038*	3.4	5.836	8.854	11.63	14.036	15.174	1.25*
		27.1	0.778*	1.938*	3.4	5.836	8.854	11.73	14.036	15.174	1.25*
		27.2	0.978*	1.938*	3.5	5.936	8.854	11.73	14.036	15.074	1.25*
		27.3	0.878*	1.938*	3.5	5.936	8.854	11.73	14.136	15.174	1.25*
		27.4	0.978*	1.938*	3.5	5.936	8.954	11.83	13.936	15.074	1.25*
		27.5	0.978*	1.938*	3.5	5.936	8.854	11.73	14.036	15.074	1.25*
		27.6	0.978*	2.038*	3.5	5.936	8.954	11.83	14.036	15.174	1.25*
		27.7	0.978*	2.038*	3.6	6.036	8.954	11.83	14.036	15.174	1.25*
		27.8	0.978*	2.038*	3.6	6.136	9.054	11.83	14.136	15.174	1.35*
		27.9	1.178*	2.038*	3.4	5.936	8.954	11.83	14.036	15.074	1.25*
		28	1.078*	2.038*	3.5	5.936	9.054	11.83	14.036	15.074	1.25*
		28.1	1.078*	2.038*	3.5	5.936	9.154	11.83	13.936	15.074	1.25*
		28.2	1.178*	2.038*	3.5	5.936	9.154	11.83	14.036	15.074	1.15*
		28.3	1.178*	2.138*	3.5	5.936	9.054	11.73	14.036	15.174	1.15*
		28.4	1.078*	2.038*	3.6	5.936	9.054	11.83	14.136	15.274	1.15*
		28.5	1.178*	2.038*	3.5	5.936	9.054	11.83	14.036	15.174	0.95*
		28.6	1.178*	2.038*	3.5	5.936	9.054	11.93	14.136	15.274	1.05*
		28.7	1.178*	2.138*	3.7	6.036	9.054	11.93	14.136	15.174	1.05*
		28.8	1.178*	2.038*	3.6	5.936	9.054	11.93	14.036	15.074	1.05*
		28.9	1.178*	2.038*	3.6	5.936	8.954	11.93	14.036	15.174	1.05*
		29	1.178*	1.938*	3.6	6.036	8.954	11.93	14.036	15.274	1.05*
		29.1	1.178*	1.938*	3.6	6.036	8.954	11.93	13.936	15.174	1.15*
		29.2	1.178*	1.838*	3.5	5.936	9.154	12.03	14.036	15.274	1.05*
		29.3	1.178*	1.938*	3.6	5.936	9.154	12.03	14.036	15.274	1.15*
		29.4	0.978*	1.538*	3.1	5.436	8.554	11.33	13.636	14.874	1.05*
		29.5	0.078*	1.038*	2.9	5.336	8.254	11.13	13.436	14.674	1.15*
		29.6	0.078*	0.738*	2.8	5.036	7.254	10.53	13.636	14.674	1.25*
		29.7	-1.022*	-0.062*	2	4.836	6.654	10.13	12.236	13.374	1.25*
		29.8	1.378*	2.138*	4.3	6.436	8.854	12.23	13.836	15.174	1.15*
		29.9	1.578*	3.038*	4.6	6.336	10.054	12.23	14.036	15.574	1.65*
		30	-1.422*	-0.262*	3.5	6.236	5.954	6.33	8.936	9.574	4.55*
		30.1	-3.822*	-4.462*	3.4	5.736	2.854	6.73	8.736	9.874	5.25*
		30.2	-2.722*	-2.462*	4	6.536	4.954	8.43	10.136	11.174	4.55*
		30.3	-1.422*	-0.262*	4.6	7.036	7.054	9.93	11.936	12.674	4.05*
		30.4	-0.422*	0.938*	4.4	6.636	7.854	10.43	12.436	13.374	3.15*
		30.5	0.478*	1.438*	4	6.236	8.354	10.73	12.536	13.574	2.55*
		30.6	0.378*	1.238*	3.7	6.136	8.554	11.13	13.036	13.974	2.05*
		30.7	0.478*	1.238*	3.4	5.736	8.654	11.23	13.336	14.074	1.95*
		30.8	0.678*	1.338*	3.6	6.036	8.354	11.03	13.136	14.074	1.65*
		30.9	0.578*	1.438*	3.5	5.836	8.254	10.83	13.336	14.174	1.65*
		31	0.778*	1.438*	3.4	5.936	8.454	10.83	13.036	13.974	1.55*
		31.1	0.978*	1.638*	3.4	5.836	8.554	10.83	13.136	14.274	1.65*
		31.2	1.078*	1.738*	3.5	5.836	8.154	11.23	12.836	14.174	1.65*
		31.3	1.078*	1.638*	3.4	5.836	8.354	10.93	12.836	14.174	1.55*
		31.4	1.178*	1.738*	3.5	5.736	8.454	10.93	12.936	14.174	1.25*
		31.5	1.178*	1.638*	3.5	5.636	8.354	10.93	12.936	13.974	1.35*
		31.6	0.978*	1.638*	3.4	5.736	8.354	11.13	12.836	13.874	1.45*
		31.7	0.778*	1.438*	3.5	5.836	8.454	11.23	12.836	13.874	1.35*
		31.8	0.978*	1.538*	3.5	6.036	8.354	10.93	12.836	13.774	1.55*
		31.9	0.978*	1.738*	3.5	6.136	8.354	10.93	12.836	13.774	1.35*
		32	0.778*	1.538*	3.5	5.836	8.354	10.93	12.936	13.774	1.35*
		32.1	0.878*	1.638*	3.4	5.836	8.254	10.83	12.836	13.774	1.35*
		32.2	0.878*	1.738*	3.4	5.936	8.354	10.83	12.736	13.674	1.15*
		32.3	0.878*	1.638*	3.4	5.936	8.354	10.73	12.736	13.774	1.25*
		32.4	1.078*	1.838*	3.4	5.836	8.354	10.73	12.736	13.774	1.35*
		32.5	1.078*	1.738*	3.3	5.736	8.354	10.73	12.636	13.574	1.25*
		32.6	0.978*	1.838*	3.3	5.736	8.454	10.83	12.536	13.474	1.05*
		32.7	0.778*	1.738*	3.3	5.636	8.354	10.73	12.636	13.674	1.25*
		32.8	0.878*	1.738*	3.4	5.736	8.454	10.73	12.436	13.574	1.05*
		32.9	0.878*	1.838*	3.3	5.536	8.254	10.63	12.336	13.474	1.15*
		33	0.878*	1.738*	3.3	5.536	8.254	10.73	12.436	13.474	1.05*
		33.1	0.878*	1.638*	3.4	5.636	8.254	10.63	12.336	13.374	1.05*
		33.2	0.878*	1.638*	3.3	5.436	8.054	10.43	12.236	13.274	1.05*
		33.3	0.878*	1.738*	3.3	5.336	8.054	10.43	12.036	13.074	1.15*
		33.4	0.978*	1.738*	3.3	5.336	7.954	10.33	12.036	13.174	1.05*
		33.5	0.878*	1.638*	3.2	5.436	8.054	10.43	12.036	13.174	1.15*
		33.6	0.878*	1.638*	3.1	5.336	7.954	10.33	12.036	13.074	1.05*
		33.7	0.978*	1.738*	3.2	5.236	7.954	10.23	11.936	13.074	1.05*
		33.8	0.978*	1.838*	3.2	5.236	7.854	10.13	11.836	12.974	1.05*
		33.9	0.978*	1.738*	3.1	5.236	7.854	10.13	11.936	12.974	1.05*
		34	0.978*	1.738*	3.1	5.236	7.854	10.03	11.836	12.974	1.05*
		34.1	0.878*	1.638*	3.1	5.236	7.754	10.13	11.736	12.874	1.05*
		34.2	0.978*	1.638*	3.1	5.136	7.754	10.03	11.736	12.774	1.05*
		34.3	0.978*	1.638*	3.1	5.136	7.854	10.03	11.736	12.774	0.95*
		34.4	0.978*	1.638*	3.1	5.136	7.854	9.93	11.636	12.774	1.15*
		34.5	0.878*	1.638*	3	5.036	7.754	9.83	11.636	12.674	1.05*
		34.6	0.778*	1.538*	3.1	5.136	7.554	9.73	11.736	12.774	1.15*
		34.7	0.778*	1.538*	3	5.036	7.454	9.63	11.536	12.674	1.15*
		34.8	0.778*	1.638*	3	5.036	7.454	9.53	11.536	12.574	1.05*
		34.9	0.778*	1.638*	3	5.136	7.554	9.63	11.536	12.674	1.15*
		35	0.778*	1.538*	2.9	4.936	7.454	9.53	11.536	12.574	1.15*
		35.1	0.778*	1.538*	2.9	4.936	7.454	9.53	11.436	12.374	1.15*
		35.2	0.778*	1.538*	3	5.036	7.554	9.53	11.336	12.374	0.95*
		35.3	0.778*	1.638*	3	5.036	7.454	9.53	11.336	12.374	0.95*
		35.4	0.778*	1.638*	2.9	4.836	7.354	9.43	11.436	12.474	1.05*
		35.5	0.678*	1.438*	3	4.936	7.354	9.43	11.336	12.374	0.95*
		35.6	0.878*	1.538*	2.9	4.936	7.354	9.43	11.336	12.274	0.95*
		35.7	0.778*	1.538*	2.9	4.936	7.254	9.33	11.236	12.274	0.95*
		35.8	0.878*	1.538*	3	4.936	7.254	9.33	11.236	12.274	0.85*
		35.9	0.778*	1.438*	2.9	4.736	7.154	9.23	11.236	12.174	0.85*
		36	0.778*	1.438*	3	4.936	7.254	9.33	11.136	12.074	1.05*
		36.1	0.878*	1.538*	2.9	4.936	7.154	9.33	11.236	12.174	0.85*
		36.2	0.678*	1.438*	3	4.936	7.254	9.23	11.236	12.174	0.85*
		36.3	0.678*	1.438*	3	4.836	7.154	9.23	11.136	12.074	0.95*
		36.4	0.778*	1.638*	2.8	4.736	7.154	9.23	11.136	12.074	1.05*
		36.5	0.678*	1.438*	3	4.836	7.054	9.13	11.036	11.974	0.85*
		36.6	0.678*	1.438*	2.9	4.836	7.054	9.23	11.136	11.874	1.05*
		36.7	0.878*	1.638*	2.8	4.736	7.154	9.13	11.036	11.774	1.05*
		36.8	0.878*	1.538*	2.7	4.636	7.154	9.13	11.036	11.674	0.95*
		36.9	0.778*	1.538*	2.9	4.736	7.054	9.13	10.936	11.674	1.05*
		37	0.878*	1.638*	2.7	4.736	7.054	9.03	10.936	11.674	1.05*
		37.1	0.778*	1.438*	2.7	4.636	7.054	9.03	11.036	11.774	1.15*
		37.2	0.778*	1.538*	2.6	4.536	7.054	9.03	10.836	11.674	1.15*
		37.3	0.778*	1.438*	2.7	4.636	6.954	9.03	10.736	11.474	1.05*
		37.4	0.778*	1.538*	2.6	4.536	7.054	9.03	10.736	11.574	1.05*
		37.5	0.878*	1.538*	2.7	4.636	7.054	9.03	10.636	11.374	1.15*
		37.6	0.778*	1.438*	2.6	4.536	6.854	8.83	10.636	11.474	1.15*
		37.7	0.878*	1.538*	2.6	4.436	6.954	8.93	10.536	11.274	1.15*
		37.8	0.878*	1.438*	2.7	4.536	6.854	8.83	10.636	11.374	1.15*
		37.9	0.778*	1.438*	2.6	4.436	6.754	8.73	10.436	11.174	1.15*
		38	0.878*	1.438*	2.7	4.636	6.854	8.83	10.536	11.174	1.15*
		38.1	0.878*	1.438*	2.7	4.536	6.754	8.73	10.436	11.074	1.15*
		38.2	0.878*	1.438*	2.7	4.536	6.654	8.63	10.436	11.174	1.15*
		38.3	0.878*	1.438*	2.7	4.536	6.654	8.53	10.336	10.974	1.15*
		38.4	0.778*	1.438*	2.7	4.536	6.754	8.73	10.336	11.074	1.15*
		38.5	0.878*	1.438*	2.7	4.536	6.554	8.53	10.236	10.974	1.15*
		38.6	0.878*	1.438*	2.6	4.536	6.554	8.53	10.236	10.974	1.15*
		38.7	0.878*	1.438*	2.7	4.536	6.554	8.43	10.136	10.874	1.15*
		38.8	0.878*	1.438*	2.6	4.536	6.454	8.53	10.236	10.874	1.05*
		38.9	0.878*	1.438*	2.7	4.536	6.454	8.43	10.136	10.874	1.25*
		39	0.878*	1.438*	2.5	4.336	6.454	8.43	9.936	10.774	1.05*
		39.1	0.878*	1.538*	2.7	4.436	6.354	8.23	10.036	10.774	1.25*
		39.2	0.878*	1.438*	2.6	4.436	6.354	8.43	9.836	10.674	1.15*
		39.3	0.778*	1.438*	2.6	4.436	6.354	8.33	9.836	10.774	1.25*
		39.4	0.778*	1.438*	2.6	4.436	6.354	8.33	9.836	10.674	1.05*
		39.5	0.978*	1.638*	2.7	4.336	6.354	8.23	9.736	10.674	1.15*
		39.6	0.778*	1.438*	2.6	4.436	6.254	8.23	9.736	10.474	1.15*
		39.7	0.978*	1.538*	2.6	4.436	6.254	8.23	9.636	10.474	1.15*
		39.8	0.778*	1.538*	2.6	4.436	6.254	8.13	9.636	10.474	1.25*
		39.9	0.978*	1.538*	2.6	4.336	6.254	8.23	9.636	10.274	1.05*
		40	0.778*	1.438*	2.7	4.436	6.254	8.13	9.536	10.374	1.15*
		40.1	0.978*	1.638*	2.5	4.336	6.254	8.13	9.536	10.274	1.15*
		40.2	0.878*	1.438*	2.5	4.336	6.254	8.13	9.536	10.274	1.15*
		40.3	0.778*	1.438*	2.5	4.236	6.254	8.23	9.436	10.174	0.95*
		40.4	0.878*	1.438*	2.5	4.336	6.154	8.03	9.436	10.174	1.15*
		40.5	0.778*	1.438*	2.5	4.236	6.254	8.13	9.436	10.074	1.05*
		40.6	0.778*	1.438*	2.5	4.336	6.154	8.03	9.336	10.074	1.05*
		40.7	0.878*	1.438*	2.5	4.236	6.154	8.03	9.236	9.974	1.05*
		40.8	0.778*	1.438*	2.5	4.136	6.254	8.03	9.236	9.874	1.15*
		40.9	0.778*	1.438*	2.4	4.236	6.154	7.93	9.236	9.874	1.05*
		41	0.878*	1.538*	2.5	4.136	6.254	8.03	9.236	9.974	1.15*
		41.1	0.778*	1.438*	2.4	4.236	6.154	7.93	9.136	9.774	1.05*
		41.2	0.778*	1.438*	2.5	4.136	6.254	8.03	9.136	9.974	1.05*
		41.3	0.778*	1.438*	2.5	4.136	6.154	7.93	9.036	9.874	1.15*
		41.4	0.778*	1.438*	2.4	4.136	6.054	7.73	8.936	9.674	1.05*
		41.5	0.778*	1.538*	2.4	4.036	6.154	7.93	9.036	9.874	1.05*
		41.6	0.778*	1.438*	2.5	4.036	6.154	7.83	8.836	9.674	1.05*
		41.7	0.578*	1.338*	2.3	3.936	6.154	7.83	8.836	9.674	1.15*
		41.8	0.778*	1.538*	2.4	3.936	6.154	7.73	8.836	9.774	1.15*
		41.9	0.678*	1.338*	2.3	3.936	6.054	7.53	8.736	9.574	1.05*
		42	0.578*	1.338*	2.4	3.936	6.054	7.73	8.736	9.474	1.15*
		42.1	0.778*	1.538*	2.3	3.936	6.054	7.53	8.736	9.574	1.05*
		42.2	0.578*	1.338*	2.3	3.936	5.954	7.53	8.736	9.474	1.05*
		42.3	0.678*	1.338*	2.4	3.936	6.154	7.63	8.636	9.374	1.15*
		42.4	0.778*	1.538*	2.3	3.936	5.954	7.53	8.736	9.474	1.15*
		42.5	0.678*	1.338*	2.3	3.936	5.854	7.43	8.536	9.374	1.05*
		42.6	0.678*	1.338*	2.3	3.936	6.054	7.63	8.636	9.274	1.05*
		42.7	0.578*	1.338*	2.3	3.836	5.854	7.43	8.536	9.274	1.15*
		42.8	0.678*	1.338*	2.2	3.936	5.854	7.43	8.636	9.374	0.95*
		42.9	0.678*	1.338*	2.3	3.936	5.854	7.43	8.536	9.174	1.05*
		43	0.778*	1.438*	2.3	3.836	5.754	7.43	8.536	9.174	1.05*
		43.1	0.678*	1.338*	2.2	3.936	5.754	7.33	8.436	9.174	1.05*
		43.2	0.578*	1.238*	2.3	3.936	5.754	7.23	8.436	9.174	0.95*
		43.3	0.778*	1.338*	2.3	3.836	5.654	7.33	8.436	9.074	1.15*
		43.4	0.578*	1.238*	2.2	3.936	5.554	7.13	8.436	9.174	1.05*
		43.5	0.578*	1.238*	2.3	3.936	5.554	7.13	8.436	9.174	1.05*
		43.6	0.678*	1.238*	2.3	3.836	5.554	7.33	8.336	8.974	1.05*
		43.7	0.778*	1.338*	2.2	3.836	5.554	7.23	8.336	8.974	1.05*
		43.8	0.778*	1.338*	2.3	3.936	5.454	7.03	8.336	8.974	1.05*
		43.9	0.678*	1.238*	2.3	3.836	5.454	7.13	8.236	8.874	1.05*
		44	0.678*	1.238*	2.3	3.836	5.454	7.13	8.236	8.874	1.15*
		44.1	0.678*	1.338*	2.3	4.036	5.354	7.03	8.236	8.874	1.05*
		44.2	0.678*	1.238*	2.3	3.836	5.454	7.13	8.136	8.774	1.05*
		44.3	0.678*	1.238*	2.3	3.836	5.354	7.03	8.136	8.774	1.05*
		44.4	0.678*	1.238*	2.2	3.836	5.254	7.03	8.036	8.774	1.05*
		44.5	0.778*	1.238*	2.3	3.936	5.354	7.03	7.936	8.774	1.05*
		44.6	0.778*	1.238*	2.2	3.836	5.154	6.93	7.936	8.574	0.95*
		44.7	0.678*	1.238*	2.2	3.736	5.154	6.93	7.936	8.674	0.95*
		44.8	0.678*	1.138*	2.2	3.736	5.154	6.93	7.936	8.674	0.95*
		44.9	0.678*	1.238*	2.3	3.936	5.254	6.83	7.736	8.574	0.95*
		45	0.878*	1.338*	2.3	3.736	5.054	6.83	7.836	8.574	0.95*
		45.1	0.778*	1.238*	2.2	3.736	5.154	6.83	7.836	8.474	0.85*
		45.2	0.678*	1.238*	2.2	3.836	5.154	6.83	7.836	8.574	0.95*
		45.3	0.678*	1.238*	2.3	3.836	5.154	6.83	7.636	8.474	0.75*
		45.4	0.878*	1.338*	2.3	3.736	4.954	6.73	7.836	8.474	0.85*
		45.5	0.778*	1.238*	2.2	3.736	4.954	6.63	7.736	8.574	0.85*
		45.6	0.778*	1.238*	2.2	3.736	5.154	6.73	7.736	8.474	0.85*
		45.7	0.678*	1.238*	2.2	3.736	5.154	6.73	7.636	8.374	0.75*
		45.8	0.878*	1.338*	2	3.636	5.054	6.73	7.636	8.374	0.75*
		45.9	0.778*	1.238*	2.1	3.536	4.954	6.53	7.636	8.374	0.75*
		46	0.778*	1.238*	2	3.636	5.054	6.63	7.636	8.374	0.75*
		46.1	0.778*	1.338*	2	3.636	5.054	6.63	7.636	8.274	0.75*
		46.2	0.678*	1.238*	2	3.436	5.054	6.63	7.636	8.274	0.75*
		46.3	0.678*	1.238*	2.1	3.536	5.054	6.43	7.636	8.274	0.85*
		46.4	0.778*	1.238*	2	3.536	5.054	6.53	7.536	8.174	0.75*
		46.5	0.778*	1.238*	2	3.536	4.954	6.43	7.536	8.074	0.75*
		46.6	0.678*	1.138*	2.1	3.536	5.054	6.53	7.636	8.174	0.75*
		46.7	0.578*	1.138*	1.9	3.436	5.154	6.43	7.536	8.174	0.65*
		46.8	0.778*	1.238*	1.9	3.336	5.054	6.53	7.436	7.974	0.75*
		46.9	0.778*	1.238*	1.9	3.336	4.954	6.33	7.536	8.074	0.75*
		47	0.778*	1.238*	2.1	3.536	4.954	6.33	7.436	8.074	0.75*
		47.1	0.678*	1.138*	2	3.436	4.954	6.23	7.536	7.974	0.65*
		47.2	0.678*	1.238*	2	3.436	5.054	6.43	7.536	7.974	0.65*
		47.3	0.778*	1.238*	1.9	3.336	4.954	6.33	7.336	7.774	0.55*
		47.4	0.678*	1.138*	1.9	3.236	4.854	6.23	7.536	7.974	0.75*
		47.5	0.678*	1.138*	1.9	3.336	4.854	6.23	7.536	7.874	0.75*
		47.6	0.578*	1.038*	1.9	3.236	4.854	6.23	7.436	7.874	0.75*
		47.7	0.578*	1.038*	1.9	3.236	4.854	6.33	7.236	7.774	0.75*
		47.8	0.778*	1.238*	1.9	3.236	4.854	6.23	7.236	7.774	0.65*
		47.9	0.678*	1.138*	1.9	3.236	4.754	6.23	7.336	7.774	0.65*
		48	0.578*	1.038*	1.9	3.236	4.654	6.13	7.336	7.774	0.75*
		48.1	0.578*	1.038*	2	3.236	4.754	6.13	7.336	7.774	0.75*
		48.2	0.678*	1.238*	2	3.136	4.754	6.13	7.236	7.774	0.65*
		48.3	0.678*	1.238*	1.8	3.036	4.754	6.13	7.236	7.674	0.65*
		48.4	0.578*	1.138*	1.8	3.136	4.754	6.13	7.236	7.674	0.65*
		48.5	0.578*	1.038*	1.8	3.136	4.754	6.13	7.136	7.574	0.85*
		48.6	0.578*	1.038*	1.9	3.036	4.654	6.03	7.136	7.574	0.75*
		48.7	0.478*	1.138*	1.9	3.136	4.554	5.93	7.136	7.674	0.65*
		48.8	0.478*	1.138*	1.8	3.036	4.554	5.93	7.036	7.574	0.65*
		48.9	0.578*	1.138*	1.8	2.936	4.654	5.83	7.036	7.474	0.65*
		49	0.578*	1.038*	1.9	3.036	4.754	6.03	7.036	7.474	0.75*
		49.1	0.578*	1.038*	1.9	3.036	4.554	5.83	6.936	7.374	0.75*
		49.2	0.578*	1.038*	1.9	3.136	4.554	5.83	6.936	7.474	0.65*
		49.3	0.578*	1.138*	1.9	3.036	4.554	5.83	6.836	7.274	0.65*
		49.4	0.578*	1.138*	1.9	2.936	4.454	5.73	6.936	7.374	0.65*
		49.5	0.578*	1.138*	1.9	3.036	4.554	5.83	6.936	7.374	0.55*
		49.6	0.578*	1.138*	1.8	2.936	4.654	5.83	6.936	7.274	0.55*
		49.7	0.578*	1.038*	1.9	3.036	4.454	5.73	6.836	7.274	0.65*
		49.8	0.578*	1.038*	1.9	3.036	4.454	5.63	6.836	7.174	0.65*
		49.9	0.478*	1.038*	1.8	2.936	4.454	5.63	6.636	7.074	0.65*
		50	0.478*	1.038*	1.8	2.936	4.354	5.63	6.736	7.174	0.55*
		50.1	0.478*	1.038*	1.8	2.936	4.454	5.63	6.736	7.174	0.55*
		50.2	0.578*	1.138*	1.9	3.036	4.354	5.63	6.736	7.174	0.45*
		50.3	0.578*	1.038*	1.7	2.936	4.354	5.53	6.636	7.174	0.45*
		50.4	0.478*	1.038*	1.8	2.836	4.354	5.53	6.536	6.974	0.65*
		50.5	0.578*	1.038*	1.8	2.836	4.354	5.53	6.536	6.974	0.55*
		50.6	0.578*	1.038*	1.8	2.936	4.254	5.53	6.536	6.874	0.55*
		50.7	0.578*	1.038*	1.6	2.836	4.354	5.53	6.536	6.974	0.45*
		50.8	0.478*	0.938*	1.7	2.836	4.354	5.63	6.536	6.974	0.55*
		50.9	0.578*	1.038*	1.7	2.836	4.254	5.53	6.436	6.874	0.55*
		51	0.578*	1.038*	1.8	2.936	4.254	5.53	6.436	6.874	0.55*
		51.1	0.578*	1.038*	1.8	2.936	4.154	5.43	6.536	6.774	0.65*
		51.2	0.578*	1.038*	1.7	2.736	4.254	5.53	6.436	6.774	0.45*
		51.3	0.478*	0.938*	1.7	2.736	4.254	5.53	6.436	6.774	0.55*
		51.4	0.578*	0.938*	1.6	2.736	4.254	5.53	6.436	6.774	0.55*
		51.5	0.478*	0.838*	1.7	2.836	4.254	5.53	6.336	6.774	0.55*
		51.6	0.578*	0.938*	1.7	2.836	4.154	5.43	6.436	6.874	0.45*
		51.7	0.578*	0.938*	1.7	2.736	4.054	5.43	6.436	6.674	0.65*
		51.8	0.578*	0.938*	1.7	2.736	4.154	5.53	6.336	6.674	0.55*
		51.9	0.578*	0.938*	1.6	2.736	4.154	5.43	6.336	6.674	0.55*
		52	0.678*	0.938*	1.7	2.736	3.954	5.33	6.336	6.574	0.55*
		52.1	0.578*	0.838*	1.7	2.736	4.054	5.43	6.236	6.574	0.55*
		52.2	0.478*	0.838*	1.7	2.836	4.054	5.43	6.236	6.574	0.45*
		52.3	0.478*	0.838*	1.6	2.736	4.054	5.43	6.236	6.474	0.55*
		52.4	0.478*	0.738*	1.6	2.736	3.954	5.43	6.236	6.474	0.45*
		52.5	0.678*	0.838*	1.6	2.636	4.054	5.43	6.236	6.574	0.45*
		52.6	0.578*	0.838*	1.6	2.636	4.054	5.33	6.236	6.574	0.45*
		52.7	0.578*	0.838*	1.7	2.836	3.954	5.33	6.336	6.574	0.55*
		52.8	0.578*	0.738*	1.7	2.836	3.954	5.23	6.236	6.574	0.55*
		52.9	0.478*	0.738*	1.6	2.636	3.954	5.33	6.136	6.374	0.55*
		53	0.578*	0.738*	1.6	2.636	3.954	5.33	6.036	6.374	0.55*
		53.1	0.578*	0.738*	1.6	2.636	3.954	5.23	6.036	6.374	0.45*
		53.2	0.578*	0.838*	1.6	2.636	3.854	5.13	6.036	6.374	0.55*
		53.3	0.578*	0.838*	1.6	2.536	3.854	5.13	6.036	6.374	0.65*
		53.4	0.578*	0.838*	1.7	2.736	3.854	5.13	6.036	6.274	0.65*
		53.5	0.578*	0.838*	1.7	2.736	3.854	5.23	5.936	6.274	0.55*
		53.6	0.478*	0.738*	1.6	2.736	3.954	5.13	5.936	6.174	0.45*
		53.7	0.478*	0.838*	1.6	2.636	3.754	5.03	5.936	6.274	0.55*
		53.8	0.578*	0.838*	1.7	2.636	3.754	5.03	5.836	6.174	0.55*
		53.9	0.478*	0.738*	1.6	2.536	3.754	5.03	6.036	6.274	0.55*
		54	0.478*	0.738*	1.6	2.536	3.854	5.13	5.836	6.174	0.55*
		54.1	0.478*	0.738*	1.5	2.536	3.854	5.13	5.836	6.174	0.55*
		54.2	0.478*	0.738*	1.5	2.536	3.854	5.03	5.836	6.174	0.55*
		54.3	0.478*	0.738*	1.6	2.636	3.754	4.93	5.736	6.074	0.55*
		54.4	0.578*	0.838*	1.6	2.636	3.754	4.93	5.836	6.074	0.55*
		54.5	0.478*	0.738*	1.6	2.536	3.754	4.83	5.836	5.974	0.55*
		54.6	0.478*	0.738*	1.5	2.436	3.654	4.93	5.736	6.074	0.55*
		54.7	0.478*	0.738*	1.5	2.436	3.554	4.83	5.736	6.074	0.55*
		54.8	0.378*	0.738*	1.5	2.436	3.754	4.83	5.736	6.074	0.45*
		54.9	0.478*	0.938*	1.5	2.536	3.754	4.83	5.636	5.974	0.45*
		55	0.478*	0.838*	1.6	2.636	3.654	4.83	5.636	5.974	0.55*
		55.1	0.378*	0.738*	1.6	2.536	3.654	4.83	5.536	5.774	0.55*
		55.2	0.378*	0.738*	1.5	2.436	3.654	4.83	5.636	5.974	0.55*
		55.3	0.478*	0.738*	1.5	2.436	3.654	4.83	5.636	5.974	0.55*
		55.4	0.478*	0.738*	1.5	2.336	3.454	4.73	5.636	5.874	0.55*
		55.5	0.478*	0.838*	1.5	2.336	3.554	4.73	5.536	5.874	0.55*
		55.6	0.478*	0.838*	1.5	2.336	3.654	4.73	5.536	5.874	0.55*
		55.7	0.478*	0.838*	1.6	2.536	3.654	4.83	5.536	5.674	0.65*
		55.8	0.378*	0.738*	1.6	2.536	3.654	4.83	5.436	5.774	0.55*
		55.9	0.478*	0.738*	1.5	2.336	3.554	4.73	5.436	5.674	0.55*
		56	0.478*	0.738*	1.5	2.336	3.454	4.63	5.536	5.774	0.55*
		56.1	0.578*	0.838*	1.5	2.336	3.654	4.73	5.436	5.774	0.55*
		56.2	0.478*	0.838*	1.4	2.336	3.554	4.83	5.436	5.674	0.55*
		56.3	0.478*	0.738*	1.4	2.436	3.554	4.73	5.236	5.574	0.45*
		56.4	0.478*	0.738*	1.5	2.336	3.554	4.73	5.236	5.674	0.55*
		56.5	0.478*	0.638*	1.4	2.236	3.454	4.63	5.336	5.674	0.55*
		56.6	0.478*	0.738*	1.5	2.336	3.454	4.53	5.336	5.674	0.55*
		56.7	0.578*	0.838*	1.5	2.336	3.354	4.63	5.336	5.674	0.55*
		56.8	0.578*	0.838*	1.5	2.336	3.454	4.63	5.336	5.674	0.45*
		56.9	0.578*	0.838*	1.4	2.336	3.454	4.53	5.236	5.574	0.45*
		57	0.578*	0.738*	1.4	2.236	3.554	4.63	5.236	5.474	0.45*
		57.1	0.578*	0.738*	1.5	2.336	3.454	4.63	5.136	5.574	0.45*
		57.2	0.378*	0.738*	1.4	2.236	3.454	4.73	5.136	5.474	0.45*
		57.3	0.578*	0.838*	1.4	2.236	3.454	4.73	5.236	5.574	0.65*
		57.4	0.578*	0.838*	1.5	2.236	3.354	4.53	5.236	5.574	0.65*
		57.5	0.578*	0.738*	1.4	2.236	3.354	4.53	5.136	5.474	0.55*
		57.6	0.578*	0.738*	1.4	2.236	3.454	4.63	5.136	5.474	0.55*
		57.7	0.578*	0.738*	1.3	2.136	3.454	4.53	5.236	5.474	0.55*
		57.8	0.478*	0.638*	1.4	2.136	3.454	4.63	5.236	5.474	0.45*
		57.9	0.678*	0.738*	1.4	2.136	3.354	4.63	5.036	5.374	0.45*
		58	0.678*	0.838*	1.5	2.236	3.254	4.53	5.036	5.374	0.45*
		58.1	0.678*	0.838*	1.4	2.236	3.254	4.53	5.036	5.374	0.55*
		58.2	0.678*	0.838*	1.4	2.236	3.254	4.43	5.036	5.274	0.55*
		58.3	0.578*	0.838*	1.4	2.136	3.254	4.53	5.036	5.374	0.55*
		58.4	0.578*	0.738*	1.3	2.036	3.254	4.53	5.136	5.374	0.55*
		58.5	0.578*	0.738*	1.3	2.136	3.354	4.63	5.136	5.374	0.45*
		58.6	0.478*	0.638*	1.3	2.136	3.354	4.53	5.036	5.274	0.45*
		58.7	0.478*	0.738*	1.4	2.136	3.254	4.53	5.036	5.274	0.45*
		58.8	0.578*	0.738*	1.3	2.036	3.154	4.43	4.936	5.274	0.35*
		58.9	0.578*	0.738*	1.4	2.136	3.154	4.43	5.036	5.274	0.45*
		59	0.578*	0.738*	1.4	2.136	3.254	4.33	5.036	5.274	0.55*
		59.1	0.678*	0.838*	1.4	2.236	3.254	4.43	4.936	5.174	0.55*
		59.2	0.578*	0.738*	1.3	2.136	3.154	4.43	5.036	5.274	0.55*
		59.3	0.578*	0.638*	1.4	2.036	3.254	4.53	5.036	5.274	0.45*
		59.4	0.478*	0.638*	1.3	2.036	3.254	4.43	5.036	5.274	0.45*
		59.5	0.478*	0.738*	1.3	2.036	3.254	4.43	4.936	5.174	0.35*
		59.6	0.578*	0.738*	1.3	2.036	3.054	4.33	4.936	5.074	0.55*
		59.7	0.578*	0.738*	1.3	2.136	3.154	4.33	4.936	5.074	0.55*
		59.8	0.578*	0.738*	1.3	2.136	3.154	4.23	4.836	5.174	0.55*
		59.9	0.478*	0.638*	1.3	2.036	3.154	4.33	4.836	5.174	0.55*
		60	0.478*	0.638*	1.2	2.036	3.154	4.33	4.836	5.174	0.55*
		60.1	0.478*	0.638*	1.2	2.036	3.154	4.33	4.836	5.074	0.55*
		60.2	0.378*	0.638*	1.3	2.036	3.154	4.23	4.836	5.074	0.45*
		60.3	0.478*	0.738*	1.3	2.036	3.054	4.23	4.836	5.074	0.45*
		60.4	0.578*	0.738*	1.2	1.836	3.154	4.33	4.836	4.974	0.55*
		60.5	0.478*	0.638*	1.2	1.936	3.254	4.33	4.836	4.974	0.55*
		60.6	0.478*	0.638*	1.2	2.036	3.254	4.23	4.736	4.974	0.55*
		60.7	0.478*	0.638*	1.2	2.036	3.154	4.23	4.736	4.974	0.65*
		60.8	0.478*	0.638*	1.2	2.036	3.054	4.13	4.636	4.774	0.55*
		60.9	0.478*	0.638*	1.2	1.936	3.054	4.13	4.636	4.974	0.55*
		61	0.378*	0.738*	1.2	1.836	3.054	4.03	4.636	4.974	0.55*
		61.1	0.478*	0.738*	1.1	1.936	3.054	4.13	4.736	4.874	0.65*
		61.2	0.478*	0.738*	1.1	1.936	2.954	4.13	4.736	4.874	0.55*
		61.3	0.478*	0.738*	1.1	1.936	3.054	4.13	4.736	4.774	0.55*
		61.4	0.478*	0.638*	1.1	1.936	3.154	4.13	4.636	4.774	0.65*
		61.5	0.478*	0.638*	1.2	1.936	3.154	4.13	4.536	4.674	0.65*
		61.6	0.378*	0.638*	1.2	1.936	3.054	4.03	4.536	4.674	0.65*
		61.7	0.478*	0.638*	1.1	1.836	3.054	3.93	4.536	4.774	0.55*
		61.8	0.478*	0.638*	1.1	1.936	2.954	3.93	4.536	4.774	0.55*
		61.9	0.478*	0.738*	1.1	1.936	2.954	3.93	4.536	4.674	0.55*
		62	0.478*	0.738*	1.1	1.936	2.954	3.93	4.636	4.674	0.55*
		62.1	0.378*	0.638*	1.1	1.936	2.954	4.03	4.536	4.674	0.65*
		62.2	0.378*	0.638*	1.1	1.836	2.854	3.93	4.436	4.474	0.55*
		62.3	0.278*	0.538*	1	1.836	2.954	3.93	4.436	4.474	0.55*
		62.4	0.378*	0.638*	1.1	1.936	2.954	3.93	4.536	4.574	0.55*
		62.5	0.478*	0.638*	1	1.836	2.954	3.93	4.536	4.574	0.55*
		62.6	0.478*	0.638*	1	1.936	2.954	3.83	4.436	4.574	0.55*
		62.7	0.378*	0.638*	1.1	1.836	2.954	3.83	4.536	4.574	0.55*
		62.8	0.378*	0.638*	1.1	1.836	2.854	3.83	4.536	4.474	0.55*
		62.9	0.278*	0.638*	1	1.836	2.854	3.73	4.536	4.474	0.55*
		63	0.278*	0.638*	1	1.836	2.854	3.83	4.436	4.474	0.55*
		63.1	0.278*	0.638*	1	1.836	2.954	3.83	4.336	4.474	0.55*
		63.2	0.278*	0.538*	1	1.836	2.954	3.83	4.336	4.374	0.45*
		63.3	0.378*	0.538*	0.9	1.736	2.754	3.63	4.436	4.474	0.45*
		63.4	0.478*	0.638*	1	1.736	2.754	3.63	4.436	4.474	0.45*
		63.5	0.478*	0.638*	1	1.836	2.754	3.63	4.436	4.474	0.45*
		63.6	0.478*	0.638*	1	1.836	2.754	3.53	4.336	4.374	0.45*
		63.7	0.378*	0.638*	1	1.836	2.754	3.53	4.336	4.374	0.45*
		63.8	0.378*	0.638*	1	1.836	2.754	3.53	4.436	4.374	0.55*
		63.9	0.278*	0.638*	1	1.836	2.754	3.53	4.236	4.374	0.55*
		64	0.378*	0.538*	0.9	1.836	2.654	3.43	4.236	4.274	0.55*
		64.1	0.378*	0.538*	0.9	1.836	2.654	3.33	4.236	4.274	0.45*
		64.2	0.378*	0.538*	0.9	1.836	2.654	3.33	4.136	4.274	0.55*
		64.3	0.378*	0.538*	0.9	1.736	2.654	3.33	4.136	4.274	0.55*
		64.4	0.378*	0.538*	0.8	1.636	2.754	3.53	4.136	4.174	0.45*
		64.5	0.378*	0.538*	0.9	1.736	2.654	3.53	4.236	4.174	0.45*
		64.6	0.378*	0.538*	0.9	1.836	2.654	3.43	4.236	4.274	0.45*
		64.7	0.378*	0.538*	0.9	1.836	2.654	3.43	4.336	4.374	0.45*
		64.8	0.478*	0.538*	0.9	1.836	2.654	3.43	4.236	4.274	0.35*
		64.9	0.378*	0.538*	0.9	1.836	2.554	3.33	4.136	4.174	0.35*
		65	0.378*	0.538*	0.9	1.736	2.554	3.23	4.136	4.174	0.35*
		65.1	0.378*	0.538*	0.9	1.736	2.554	3.23	4.036	4.074	0.35*
		65.2	0.378*	0.538*	0.8	1.736	2.554	3.23	4.036	4.074	0.45*
		65.3	0.378*	0.638*	0.8	1.736	2.554	3.23	4.136	4.174	0.45*
		65.4	0.378*	0.638*	0.8	1.736	2.554	3.33	4.136	4.174	0.45*
		65.5	0.378*	0.638*	0.8	1.736	2.454	3.33	4.036	4.074	0.45*
		65.6	0.378*	0.538*	0.8	1.736	2.554	3.33	4.036	4.074	0.45*
		65.7	0.478*	0.538*	0.8	1.736	2.554	3.33	4.036	4.074	0.35*
		65.8	0.378*	0.538*	0.8	1.736	2.554	3.23	3.936	3.974	0.35*
		65.9	0.378*	0.538*	1	1.836	2.454	3.13	3.836	3.974	0.35*
		66	0.478*	0.638*	0.9	1.736	2.354	3.13	3.836	3.874	0.35*
		66.1	0.378*	0.538*	0.9	1.736	2.454	3.23	3.936	4.074	0.45*
		66.2	0.378*	0.638*	0.8	1.736	2.454	3.23	3.936	4.074	0.45*
		66.3	0.378*	0.638*	0.8	1.736	2.454	3.23	3.836	4.074	0.45*
		66.4	0.378*	0.538*	0.8	1.736	2.454	3.13	3.936	3.974	0.35*
		66.5	0.378*	0.538*	0.8	1.736	2.454	3.13	3.936	3.974	0.25*
		66.6	0.378*	0.538*	0.8	1.736	2.554	3.23	3.936	3.974	0.25*
		66.7	0.378*	0.538*	0.7	1.736	2.354	3.13	3.736	3.874	0.25*
		66.8	0.478*	0.538*	0.8	1.736	2.354	3.13	3.736	3.774	0.25*
		66.9	0.378*	0.538*	0.8	1.636	2.454	3.23	3.736	3.874	0.35*
		67	0.378*	0.538*	0.7	1.536	2.454	3.23	3.736	3.874	0.35*
		67.1	0.278*	0.538*	0.7	1.536	2.454	3.13	3.636	3.874	0.35*
		67.2	0.378*	0.638*	0.8	1.736	2.454	3.13	3.736	3.874	0.45*
		67.3	0.378*	0.538*	0.8	1.736	2.354	3.13	3.836	3.874	0.35*
		67.4	0.378*	0.538*	0.8	1.736	2.354	3.13	3.836	3.874	0.35*
		67.5	0.378*	0.538*	0.8	1.736	2.354	3.13	3.836	3.874	0.25*
		67.6	0.378*	0.538*	0.7	1.736	2.354	3.13	3.636	3.674	0.25*
		67.7	0.378*	0.538*	0.7	1.536	2.354	3.13	3.636	3.674	0.25*
		67.8	0.378*	0.638*	0.7	1.536	2.554	3.23	3.636	3.774	0.25*
		67.9	0.378*	0.538*	0.7	1.536	2.454	3.13	3.636	3.774	0.35*
		68	0.378*	0.538*	0.7	1.536	2.354	3.13	3.536	3.774	0.25*
		68.1	0.378*	0.538*	0.7	1.636	2.354	3.13	3.536	3.774	0.25*
		68.2	0.278*	0.438*	0.8	1.736	2.354	3.13	3.536	3.674	0.25*
		68.3	0.278*	0.438*	0.8	1.736	2.354	3.03	3.536	3.674	0.35*
		68.4	0.378*	0.538*	0.8	1.636	2.354	3.03	3.636	3.774	0.35*
		68.5	0.378*	0.538*	0.8	1.636	2.354	3.13	3.636	3.674	0.35*
		68.6	0.378*	0.538*	0.8	1.636	2.454	3.23	3.536	3.674	0.35*
		68.7	0.378*	0.538*	0.6	1.536	2.354	3.03	3.536	3.674	0.25*
		68.8	0.378*	0.538*	0.7	1.536	2.254	3.03	3.536	3.674	0.35*
		68.9	0.378*	0.538*	0.7	1.436	2.354	3.03	3.536	3.574	0.25*
		69	0.378*	0.538*	0.7	1.536	2.354	3.03	3.536	3.574	0.25*
		69.1	0.378*	0.538*	0.8	1.636	2.354	2.93	3.536	3.674	0.35*
		69.2	0.278*	0.538*	0.8	1.636	2.354	2.93	3.536	3.674	0.35*
		69.3	0.278*	0.538*	0.8	1.636	2.354	3.03	3.536	3.474	0.35*
		69.4	0.278*	0.438*	0.8	1.636	2.354	3.03	3.536	3.574	0.35*
		69.5	0.278*	0.438*	0.8	1.636	2.354	3.13	3.436	3.574	0.35*
		69.6	0.278*	0.438*	0.7	1.536	2.254	2.93	3.436	3.574	0.35*
		69.7	0.278*	0.438*	0.6	1.436	2.254	2.93	3.436	3.474	0.25*
		69.8	0.278*	0.438*	0.6	1.436	2.254	2.93	3.436	3.474	0.25*
		69.9	0.278*	0.338*	0.8	1.636	2.254	2.93	3.436	3.474	0.35*
		70	0.378*	0.538*	0.8	1.636	2.254	2.93	3.436	3.474	0.35*
		70.1	0.278*	0.438*	0.8	1.536	2.354	2.93	3.236	3.374	0.35*
		70.2	0.278*	0.438*	0.8	1.536	2.254	2.93	3.236	3.274	0.35*
		70.3	0.178*	0.438*	0.8	1.536	2.154	2.83	3.436	3.474	0.35*
		70.4	0.178*	0.438*	0.8	1.436	2.154	2.83	3.436	3.474	0.35*
		70.5	0.178*	0.438*	0.8	1.436	2.154	2.83	3.436	3.474	0.45*
		70.6	0.178*	0.338*	0.8	1.436	2.154	2.83	3.336	3.374	0.45*
		70.7	0.178*	0.438*	0.8	1.436	2.154	2.83	3.336	3.374	0.45*
		70.8	0.278*	0.438*	0.8	1.436	2.154	2.83	3.336	3.374	0.35*
		70.9	0.378*	0.538*	0.8	1.436	2.154	2.83	3.336	3.374	0.35*
		71	0.378*	0.538*	0.8	1.436	2.254	2.83	3.336	3.274	0.35*
		71.1	0.178*	0.438*	0.8	1.436	2.154	2.83	3.236	3.174	0.35*
		71.2	0.178*	0.438*	0.8	1.436	2.054	2.73	3.236	3.174	0.35*
		71.3	0.178*	0.338*	0.8	1.436	2.054	2.73	3.336	3.374	0.45*
		71.4	0.178*	0.338*	0.8	1.336	2.054	2.73	3.336	3.374	0.45*
		71.5	0.178*	0.438*	0.8	1.336	2.054	2.73	3.336	3.274	0.45*
		71.6	0.178*	0.438*	0.8	1.336	2.054	2.73	3.336	3.274	0.45*
		71.7	0.378*	0.538*	0.8	1.336	2.054	2.73	3.236	3.274	0.45*
		71.8	0.378*	0.538*	0.9	1.336	2.054	2.63	3.236	3.274	0.35*
		71.9	0.378*	0.438*	0.9	1.436	2.154	2.73	3.236	3.274	0.35*
		72	0.378*	0.438*	0.8	1.436	2.054	2.73	3.236	3.174	0.35*
		72.1	0.278*	0.338*	0.8	1.336	2.054	2.73	3.336	3.174	0.45*
		72.2	0.178*	0.338*	0.8	1.336	2.054	2.73	3.136	3.174	0.45*
		72.3	0.178*	0.338*	0.8	1.336	1.954	2.73	3.236	3.274	0.45*
		72.4	0.178*	0.438*	0.8	1.336	1.954	2.63	3.236	3.274	0.45*
		72.5	0.178*	0.438*	0.8	1.336	2.054	2.63	3.236	3.274	0.45*
		72.6	0.178*	0.438*	0.7	1.236	2.054	2.63	3.236	3.274	0.45*
		72.7	0.178*	0.438*	0.8	1.336	1.954	2.53	3.236	3.174	0.35*
		72.8	0.278*	0.538*	0.9	1.236	1.954	2.63	3.136	3.174	0.35*
		72.9	0.378*	0.438*	0.8	1.336	1.854	2.53	3.136	3.174	0.45*
		73	0.278*	0.438*	0.8	1.336	1.954	2.63	3.136	3.174	0.45*
		73.1	0.178*	0.338*	0.8	1.336	1.954	2.63	3.136	3.174	0.45*
		73.2	0.178*	0.338*	0.8	1.336	2.054	2.63	3.136	2.974	0.35*
		73.3	0.178*	0.338*	0.8	1.336	2.054	2.63	3.136	3.074	0.35*
		73.4	0.178*	0.438*	0.8	1.336	2.054	2.53	3.036	3.074	0.45*
		73.5	0.178*	0.438*	0.8	1.236	1.954	2.53	3.036	3.074	0.45*
		73.6	0.178*	0.438*	0.8	1.236	1.954	2.63	3.036	3.074	0.45*
		73.7	0.278*	0.538*	0.7	1.136	1.954	2.63	3.036	2.974	0.45*
		73.8	0.378*	0.438*	0.8	1.136	1.854	2.43	3.136	3.074	0.45*
		73.9	0.278*	0.438*	0.9	1.236	1.854	2.43	3.136	3.074	0.45*
		74	0.278*	0.438*	0.9	1.236	2.054	2.53	3.036	3.074	0.45*
		74.1	0.278*	0.438*	0.8	1.336	1.954	2.53	3.036	3.174	0.35*
		74.2	0.278*	0.438*	0.8	1.336	1.954	2.43	3.036	3.174	0.35*
		74.3	0.278*	0.438*	0.8	1.236	1.954	2.53	3.136	3.074	0.35*
		74.4	0.278*	0.438*	0.8	1.236	1.954	2.53	3.136	3.074	0.35*
		74.5	0.278*	0.338*	0.8	1.236	1.954	2.53	3.036	3.074	0.45*
		74.6	0.278*	0.338*	0.8	1.236	1.954	2.53	3.036	3.074	0.45*
		74.7	0.278*	0.338*	0.9	1.236	2.054	2.53	3.036	2.974	0.35*
		74.8	0.178*	0.438*	0.7	1.136	1.854	2.33	3.036	2.974	0.35*
		74.9	0.178*	0.438*	0.8	1.136	1.854	2.33	3.036	2.974	0.45*
		75	0.178*	0.438*	0.8	1.136	1.854	2.33	3.036	3.074	0.45*
		75.1	0.178*	0.338*	0.8	1.236	1.854	2.33	2.936	3.074	0.45*
		75.2	0.178*	0.338*	0.8	1.236	1.854	2.33	2.936	3.074	0.45*
		75.3	0.178*	0.338*	0.8	1.236	1.854	2.43	2.936	2.974	0.45*
		75.4	0.178*	0.338*	0.8	1.236	1.854	2.43	2.936	2.974	0.35*
		75.5	0.378*	0.438*	0.8	1.236	1.854	2.43	3.036	2.974	0.45*
		75.6	0.278*	0.338*	0.8	1.236	1.954	2.43	3.036	2.974	0.45*
		75.7	0.278*	0.338*	0.8	1.136	1.854	2.33	2.936	2.974	0.45*
		75.8	0.178*	0.338*	0.8	1.136	1.854	2.23	3.036	3.074	0.35*
		75.9	0.178*	0.438*	0.8	1.136	1.854	2.23	2.936	2.874	0.35*
		76	0.178*	0.438*	0.8	1.236	1.754	2.23	2.936	2.974	0.35*
		76.1	0.178*	0.438*	0.8	1.236	1.754	2.23	2.936	2.974	0.45*
		76.2	0.178*	0.438*	0.8	1.236	1.754	2.23	2.836	2.974	0.45*
		76.3	0.278*	0.338*	0.8	1.236	1.754	2.23	2.836	2.974	0.45*
		76.4	0.278*	0.338*	0.8	1.236	1.854	2.43	2.836	2.874	0.45*
		76.5	0.278*	0.338*	0.9	1.236	1.954	2.33	2.936	2.874	0.45*
		76.6	0.278*	0.338*	0.9	1.136	1.954	2.33	2.936	2.874	0.35*
		76.7	0.278*	0.338*	0.8	1.136	1.854	2.33	2.836	2.874	0.35*
		76.8	0.178*	0.238*	0.8	1.236	1.854	2.33	2.836	2.874	0.25*
		76.9	0.178*	0.238*	0.8	1.236	1.854	2.23	2.736	2.774	0.25*
		77	0.078*	0.238*	0.8	1.236	1.754	2.13	2.736	2.774	0.35*
		77.1	0.178*	0.338*	0.8	1.136	1.754	2.13	2.836	2.874	0.35*
		77.2	0.178*	0.338*	0.8	1.136	1.654	2.13	2.736	2.974	0.35*
		77.3	0.178*	0.338*	0.7	1.136	1.654	2.13	2.836	2.874	0.35*
		77.4	0.278*	0.338*	0.8	1.136	1.754	2.23	2.836	2.874	0.45*
		77.5	0.278*	0.338*	0.8	1.136	1.754	2.23	2.836	2.874	0.35*
		77.6	0.278*	0.338*	0.8	1.236	1.854	2.33	2.836	2.874	0.25*
		77.7	0.278*	0.338*	0.8	1.236	1.854	2.23	2.736	2.874	0.25*
		77.8	0.278*	0.338*	0.8	1.236	1.854	2.23	2.736	2.874	0.25*
		77.9	0.178*	0.238*	0.7	1.136	1.754	2.13	2.636	2.774	0.25*
		78	0.078*	0.238*	0.7	1.136	1.754	2.13	2.636	2.674	0.25*
		78.1	0.078*	0.238*	0.7	1.136	1.754	2.13	2.636	2.674	0.25*
		78.2	0.178*	0.338*	0.7	1.136	1.654	2.03	2.636	2.774	0.35*
		78.3	0.178*	0.338*	0.8	1.236	1.654	2.03	2.736	2.874	0.35*
		78.4	0.278*	0.438*	0.8	1.236	1.654	2.03	2.736	2.874	0.35*
		78.5	0.278*	0.338*	0.8	1.236	1.654	2.03	2.736	2.874	0.35*
		78.6	0.278*	0.338*	0.8	1.236	1.754	2.23	2.636	2.774	0.45*
		78.7	0.278*	0.338*	0.8	1.136	1.854	2.13	2.536	2.674	0.35*
		78.8	0.278*	0.338*	0.7	1.036	1.854	2.13	2.536	2.674	0.35*
		78.9	0.278*	0.338*	0.7	1.036	1.854	2.13	2.536	2.674	0.25*
		79	0.178*	0.238*	0.7	1.136	1.654	2.03	2.536	2.674	0.25*
		79.1	0.178*	0.238*	0.7	1.136	1.654	2.03	2.636	2.674	0.25*
		79.2	0.178*	0.238*	0.6	1.136	1.654	2.03	2.636	2.674	0.25*
		79.3	0.078*	0.338*	0.6	1.136	1.754	2.13	2.636	2.674	0.25*
		79.4	0.178*	0.438*	0.7	1.236	1.754	2.23	2.436	2.474	0.25*
		79.5	0.278*	0.338*	0.8	1.236	1.754	2.13	2.436	2.574	0.25*
		79.6	0.278*	0.338*	0.7	1.136	1.754	2.13	2.436	2.574	0.25*
		79.7	0.278*	0.338*	0.7	1.136	1.754	2.13	2.536	2.674	0.35*
		79.8	0.278*	0.338*	0.7	1.036	1.854	2.13	2.536	2.674	0.35*
		79.9	0.278*	0.338*	0.7	1.036	1.754	2.13	2.536	2.674	0.25*
		80	0.278*	0.338*	0.7	1.036	1.754	2.03	2.536	2.574	0.35*
		80.1	0.278*	0.338*	0.7	1.036	1.754	2.03	2.536	2.574	0.25*
		80.2	0.278*	0.338*	0.7	1.036	1.754	2.03	2.436	2.474	0.25*
		80.3	0.278*	0.438*	0.7	1.136	1.754	2.03	2.436	2.474	0.25*
		80.4	0.278*	0.438*	0.7	1.236	1.754	2.03	2.436	2.474	0.25*
		80.5	0.378*	0.338*	0.6	1.136	1.754	2.03	2.436	2.474	0.25*
		80.6	0.278*	0.338*	0.6	1.136	1.754	2.13	2.336	2.374	0.25*
		80.7	0.278*	0.338*	0.6	1.136	1.754	2.03	2.436	2.474	0.25*
		80.8	0.278*	0.338*	0.6	1.136	1.754	2.03	2.436	2.474	0.25*
		80.9	0.278*	0.338*	0.7	1.136	1.654	2.03	2.436	2.474	0.25*
		81	0.278*	0.338*	0.7	1.136	1.654	2.03	2.536	2.474	0.35*
		81.1	0.278*	0.338*	0.7	1.036	1.754	2.03	2.436	2.374	0.35*
		81.2	0.278*	0.438*	0.7	1.036	1.754	2.03	2.436	2.374	0.35*
		81.3	0.278*	0.338*	0.7	1.036	1.754	2.03	2.336	2.374	0.35*
		81.4	0.378*	0.438*	0.6	1.036	1.754	1.93	2.336	2.374	0.25*
		81.5	0.378*	0.338*	0.5	0.936	1.754	1.93	2.336	2.374	0.25*
		81.6	0.378*	0.338*	0.5	0.936	1.654	1.93	2.336	2.274	0.25*
		81.7	0.378*	0.338*	0.6	1.036	1.654	1.93	2.336	2.274	0.25*
		81.8	0.378*	0.338*	0.6	1.036	1.654	1.93	2.236	2.274	0.15*
		81.9	0.378*	0.338*	0.6	1.136	1.654	1.93	2.336	2.274	0.25*
		82	0.278*	0.338*	0.6	1.136	1.654	2.03	2.336	2.274	0.35*
		82.1	0.278*	0.238*	0.6	1.036	1.754	2.03	2.336	2.274	0.35*
		82.2	0.278*	0.138*	0.6	1.036	1.754	2.03	2.436	2.374	0.35*
		82.3	0.278*	0.138*	0.7	1.036	1.654	1.93	2.436	2.374	0.35*
		82.4	0.278*	0.238*	0.6	0.936	1.754	1.93	2.236	2.274	0.35*
		82.5	0.278*	0.238*	0.5	0.936	1.754	1.93	2.236	2.174	0.25*
		82.6	0.278*	0.238*	0.5	0.936	1.654	1.93	2.236	2.174	0.25*
		82.7	0.378*	0.338*	0.5	0.936	1.654	1.93	2.236	2.174	0.15*
		82.8	0.378*	0.338*	0.5	0.836	1.654	1.93	2.236	2.174	0.15*
		82.9	0.278*	0.238*	0.5	0.936	1.654	1.83	2.236	2.074	0.25*
		83	0.378*	0.138*	0.5	0.936	1.554	1.73	2.136	2.074	0.25*
		83.1	0.378*	0.138*	0.5	0.936	1.654	1.83	2.236	2.074	0.35*
		83.2	0.378*	0.238*	0.6	1.036	1.754	1.93	2.236	2.074	0.35*
		83.3	0.278*	0.238*	0.6	1.036	1.754	1.93	2.236	1.974	0.35*
		83.4	0.278*	0.238*	0.7	1.036	1.654	1.93	2.236	2.074	0.25*
		83.5	0.278*	0.238*	0.6	0.936	1.654	1.93	2.236	2.074	0.25*
		83.6	0.278*	0.238*	0.5	0.936	1.654	1.83	2.036	1.974	0.25*
		83.7	0.278*	0.238*	0.5	0.936	1.654	1.83	2.136	2.074	0.35*
		83.8	0.478*	0.338*	0.5	0.936	1.554	1.73	2.136	2.074	0.35*
		83.9	0.478*	0.238*	0.5	0.936	1.654	1.83	2.136	2.074	0.25*
		84	0.378*	0.138*	0.5	0.936	1.654	1.83	2.136	2.074	0.35*
		84.1	0.378*	0.238*	0.5	0.936	1.654	1.83	2.136	1.974	0.35*
		84.2	0.278*	0.238*	0.5	0.936	1.554	1.83	2.136	1.974	0.35*
		84.3	0.278*	0.238*	0.6	0.936	1.654	1.83	2.136	1.974	0.35*
		84.4	0.278*	0.238*	0.6	0.836	1.654	1.83	2.136	1.974	0.25*
		84.5	0.278*	0.238*	0.6	0.836	1.654	1.83	2.136	2.074	0.25*
		84.6	0.278*	0.238*	0.5	0.836	1.554	1.73	2.136	2.074	0.25*
		84.7	0.278*	0.238*	0.5	0.836	1.554	1.83	2.236	2.074	0.25*
		84.8	0.178*	0.138*	0.5	0.836	1.454	1.83	2.236	2.074	0.35*
		84.9	0.278*	0.138*	0.5	0.936	1.454	1.73	2.236	2.074	0.25*
		85	0.378*	0.238*	0.6	0.936	1.454	1.73	2.136	1.974	0.25*
		85.1	0.378*	0.238*	0.6	0.936	1.554	1.83	2.036	1.974	0.25*
		85.2	0.278*	0.138*	0.6	0.936	1.654	1.83	2.036	1.974	0.35*
		85.3	0.278*	0.238*	0.6	0.936	1.554	1.83	2.036	1.974	0.35*
		85.4	0.278*	0.238*	0.6	0.936	1.554	1.83	2.036	1.974	0.25*
		85.5	0.178*	0.138*	0.6	0.836	1.554	1.83	2.036	1.974	0.25*
		85.6	0.178*	0.138*	0.5	0.736	1.454	1.63	2.036	1.974	0.25*
		85.7	0.278*	0.238*	0.4	0.836	1.454	1.63	2.036	1.974	0.35*
		85.8	0.278*	0.238*	0.4	0.836	1.454	1.63	2.036	1.974	0.35*
		85.9	0.378*	0.238*	0.5	0.936	1.454	1.63	2.036	1.974	0.35*
		86	0.378*	0.238*	0.6	0.936	1.354	1.63	2.136	1.974	0.35*
		86.1	0.278*	0.238*	0.6	0.936	1.354	1.73	2.036	1.974	0.35*
		86.2	0.278*	0.238*	0.6	0.936	1.454	1.83	2.036	1.974	0.35*
		86.3	0.278*	0.338*	0.6	0.936	1.554	1.83	2.036	1.974	0.35*
		86.4	0.178*	0.238*	0.6	0.936	1.554	1.83	2.036	1.974	0.35*
		86.5	0.178*	0.238*	0.6	0.936	1.554	1.73	2.036	1.974	0.25*
		86.6	0.178*	0.238*	0.6	0.936	1.454	1.73	2.036	1.974	0.35*
		86.7	0.278*	0.238*	0.5	0.936	1.354	1.63	2.036	1.974	0.35*
		86.8	0.278*	0.238*	0.4	0.836	1.354	1.63	2.036	1.974	0.25*
		86.9	0.178*	0.238*	0.5	0.936	1.354	1.63	2.036	1.974	0.25*
		87	0.178*	0.238*	0.6	0.936	1.354	1.63	2.036	1.974	0.35*
		87.1	0.178*	0.238*	0.6	0.936	1.354	1.63	2.036	1.874	0.35*
		87.2	0.178*	0.138*	0.6	0.936	1.354	1.53	1.936	1.874	0.35*
		87.3	0.178*	0.138*	0.6	0.936	1.354	1.63	1.936	1.974	0.35*
		87.4	0.278*	0.238*	0.6	0.936	1.354	1.63	1.936	1.974	0.35*
		87.5	0.278*	0.338*	0.5	0.936	1.554	1.73	1.936	1.974	0.35*
		87.6	0.278*	0.338*	0.5	0.836	1.554	1.73	1.936	1.974	0.35*
		87.7	0.278*	0.338*	0.4	0.736	1.554	1.73	1.936	1.974	0.25*
		87.8	0.278*	0.238*	0.4	0.736	1.554	1.63	2.036	1.874	0.25*
		87.9	0.178*	0.238*	0.5	0.736	1.454	1.63	1.936	1.874	0.35*
		88	0.178*	0.238*	0.5	0.736	1.354	1.53	1.836	1.774	0.25*
		88.1	0.278*	0.338*	0.6	0.936	1.354	1.53	1.836	1.774	0.35*
		88.2	0.278*	0.338*	0.6	0.936	1.354	1.53	1.936	1.874	0.35*
		88.3	0.178*	0.238*	0.6	0.936	1.354	1.53	1.936	1.874	0.35*
		88.4	0.178*	0.238*	0.5	0.936	1.354	1.53	1.936	1.974	0.35*
		88.5	0.178*	0.238*	0.5	0.936	1.354	1.53	1.936	1.974	0.35*
		88.6	0.278*	0.238*	0.5	0.936	1.354	1.53	1.936	1.874	0.35*
		88.7	0.178*	0.338*	0.5	0.936	1.354	1.53	1.936	1.874	0.25*
		88.8	0.178*	0.338*	0.5	0.836	1.454	1.53	1.836	1.874	0.25*
		88.9	0.178*	0.338*	0.5	0.836	1.454	1.53	1.936	1.874	0.25*
		89	0.178*	0.338*	0.5	0.836	1.454	1.53	1.836	1.774	0.25*
		89.1	0.178*	0.338*	0.4	0.836	1.454	1.53	1.836	1.674	0.25*
		89.2	0.178*	0.338*	0.3	0.736	1.454	1.63	1.836	1.674	0.25*
		89.3	0.278*	0.438*	0.4	0.736	1.454	1.53	1.836	1.674	0.35*
		89.4	0.378*	0.438*	0.4	0.836	1.354	1.53	1.836	1.674	0.25*
		89.5	0.278*	0.238*	0.4	0.836	1.354	1.53	1.836	1.674	0.35*
		89.6	0.278*	0.238*	0.4	0.836	1.354	1.53	1.836	1.674	0.35*
		89.7	0.278*	0.238*	0.4	0.736	1.354	1.53	1.836	1.774	0.35*
		89.8	0.278*	0.338*	0.4	0.736	1.354	1.53	1.836	1.774	0.25*
		89.9	0.278*	0.338*	0.4	0.736	1.354	1.53	1.936	1.774	0.25*
		90	0.278*	0.338*	0.4	0.736	1.354	1.53	1.936	1.674	0.25*
		90.1	0.178*	0.338*	0.3	0.736	1.254	1.53	1.936	1.774	0.25*
		90.2	0.178*	0.338*	0.4	0.836	1.354	1.43	1.936	1.774	0.25*
		90.3	0.178*	0.338*	0.4	0.836	1.354	1.43	1.836	1.674	0.25*
		90.4	0.278*	0.338*	0.4	0.836	1.354	1.43	1.836	1.674	0.25*
		90.5	0.278*	0.338*	0.4	0.836	1.354	1.43	1.836	1.674	0.25*
		90.6	0.278*	0.338*	0.5	0.836	1.354	1.43	1.836	1.674	0.25*
		90.7	0.278*	0.338*	0.4	0.636	1.254	1.33	1.836	1.574	0.25*
		90.8	0.178*	0.238*	0.4	0.636	1.254	1.43	1.736	1.574	0.25*
		90.9	0.178*	0.238*	0.4	0.636	1.254	1.43	1.836	1.674	0.25*
		91	0.178*	0.138*	0.4	0.736	1.354	1.53	1.836	1.674	0.35*
		91.1	0.278*	0.238*	0.3	0.736	1.254	1.53	1.836	1.674	0.25*
		91.2	0.278*	0.338*	0.3	0.736	1.254	1.53	1.936	1.674	0.25*
		91.3	0.278*	0.338*	0.3	0.736	1.354	1.43	1.936	1.774	0.25*
		91.4	0.378*	0.338*	0.3	0.736	1.354	1.43	1.936	1.774	0.25*
		91.5	0.378*	0.338*	0.3	0.636	1.354	1.43	1.936	1.774	0.25*
		91.6	0.378*	0.338*	0.3	0.636	1.354	1.43	1.936	1.774	0.25*
		91.7	0.378*	0.338*	0.3	0.636	1.354	1.43	1.836	1.674	0.25*
		91.8	0.378*	0.338*	0.3	0.636	1.354	1.43	1.736	1.574	0.25*
		91.9	0.378*	0.338*	0.4	0.736	1.354	1.43	1.736	1.574	0.25*
		92	0.378*	0.338*	0.4	0.836	1.254	1.33	1.736	1.574	0.35*
		92.1	0.378*	0.338*	0.4	0.736	1.254	1.33	1.736	1.574	0.25*
		92.2	0.478*	0.338*	0.4	0.736	1.154	1.33	1.736	1.574	0.25*
		92.3	0.378*	0.338*	0.4	0.736	1.154	1.33	1.736	1.574	0.25*
		92.4	0.378*	0.338*	0.4	0.736	1.154	1.33	1.736	1.574	0.15*
		92.5	0.378*	0.338*	0.4	0.636	1.154	1.33	1.936	1.674	0.25*
		92.6	0.378*	0.338*	0.3	0.636	1.154	1.33	1.936	1.674	0.25*
		92.7	0.278*	0.138*	0.3	0.636	1.254	1.33	1.836	1.674	0.25*
		92.8	0.278*	0.238*	0.3	0.636	1.254	1.33	1.736	1.574	0.25*
		92.9	0.278*	0.238*	0.3	0.636	1.254	1.33	1.736	1.574	0.25*
		93	0.278*	0.238*	0.3	0.636	1.254	1.33	1.736	1.574	0.25*
		93.1	0.278*	0.238*	0.4	0.736	1.254	1.33	1.736	1.574	0.25*
		93.2	0.278*	0.238*	0.3	0.636	1.254	1.33	1.736	1.574	0.25*
		93.3	0.278*	0.238*	0.3	0.636	1.254	1.43	1.736	1.574	0.25*
		93.4	0.378*	0.338*	0.3	0.636	1.154	1.33	1.736	1.574	0.35*
		93.5	0.478*	0.338*	0.3	0.736	1.154	1.33	1.736	1.574	0.35*
		93.6	0.478*	0.338*	0.3	0.736	1.154	1.23	1.736	1.574	0.35*
		93.7	0.478*	0.338*	0.4	0.736	1.154	1.23	1.736	1.574	0.35*
		93.8	0.378*	0.238*	0.4	0.636	1.154	1.23	1.736	1.474	0.35*
		93.9	0.278*	0.238*	0.4	0.636	1.254	1.23	1.736	1.574	0.25*
		94	0.278*	0.138*	0.4	0.636	1.254	1.23	1.836	1.674	0.25*
		94.1	0.278*	0.138*	0.4	0.636	1.254	1.23	1.736	1.574	0.25*
		94.2	0.278*	0.138*	0.4	0.636	1.154	1.33	1.636	1.574	0.25*
		94.3	0.278*	0.138*	0.4	0.636	1.154	1.33	1.636	1.574	0.35*
		94.4	0.278*	0.138*	0.4	0.636	1.154	1.33	1.636	1.574	0.25*
		94.5	0.278*	0.138*	0.4	0.636	1.154	1.33	1.636	1.574	0.25*
		94.6	0.278*	0.238*	0.4	0.636	1.154	1.33	1.636	1.574	0.25*
		94.7	0.378*	0.238*	0.4	0.636	1.254	1.33	1.636	1.574	0.25*
		94.8	0.378*	0.238*	0.4	0.736	1.254	1.33	1.636	1.574	0.35*
		94.9	0.378*	0.238*	0.5	0.736	1.254	1.23	1.636	1.574	0.35*
		95	0.478*	0.338*	0.5	0.636	1.254	1.23	1.436	1.474	0.35*
		95.1	0.378*	0.238*	0.4	0.536	1.254	1.23	1.436	1.374	0.35*
		95.2	0.378*	0.238*	0.3	0.536	1.254	1.33	1.536	1.474	0.35*
		95.3	0.278*	0.138*	0.3	0.536	1.254	1.33	1.536	1.474	0.35*
		95.4	0.278*	0.138*	0.3	0.536	1.154	1.33	1.536	1.474	0.35*
		95.5	0.278*	0.138*	0.3	0.636	1.154	1.33	1.536	1.474	0.45*
		95.6	0.278*	0.138*	0.3	0.636	1.154	1.23	1.636	1.574	0.35*
		95.7	0.278*	0.138*	0.4	0.736	1.154	1.23	1.636	1.574	0.35*
		95.8	0.278*	0.138*	0.4	0.736	1.154	1.23	1.536	1.474	0.45*
		95.9	0.278*	0.138*	0.4	0.736	1.254	1.33	1.536	1.474	0.45*
		96	0.278*	0.138*	0.4	0.736	1.254	1.33	1.536	1.474	0.45*
		96.1	0.278*	0.138*	0.4	0.736	1.254	1.43	1.536	1.474	0.35*
		96.2	0.278*	0.038*	0.4	0.736	1.354	1.43	1.536	1.474	0.35*
		96.3	0.178*	0.038*	0.5	0.736	1.354	1.43	1.536	1.474	0.35*
		96.4	0.178*	0.038*	0.5	0.736	1.354	1.43	1.536	1.574	0.35*
		96.5	0.178*	0.038*	0.4	0.736	1.254	1.43	1.336	1.374	0.35*
		96.6	0.178*	0.038*	0.4	0.736	1.254	1.43	1.336	1.374	0.35*
		96.7	0.278*	0.138*	0.4	0.736	1.154	1.33	1.336	1.374	0.35*
		96.8	0.278*	0.238*	0.3	0.636	1.154	1.23	1.436	1.374	0.35*
		96.9	0.278*	0.238*	0.3	0.636	1.154	1.23	1.436	1.374	0.35*
		97	0.178*	0.138*	0.3	0.636	1.154	1.23	1.436	1.374	0.45*
		97.1	0.178*	0.138*	0.3	0.636	1.154	1.23	1.436	1.374	0.45*
		97.2	0.078*	0.038*	0.3	0.636	1.254	1.23	1.536	1.374	0.35*
		97.3	0.178*	0.038*	0.3	0.636	1.254	1.23	1.536	1.374	0.35*
		97.4	0.178*	0.038*	0.4	0.636	1.254	1.33	1.536	1.374	0.35*
		97.5	0.178*	0.038*	0.3	0.736	1.154	1.33	1.536	1.374	0.35*
		97.6	0.178*	0.038*	0.3	0.736	1.154	1.23	1.536	1.374	0.35*
		97.7	0.178*	0.038*	0.3	0.736	1.154	1.23	1.536	1.374	0.35*
		97.8	0.178*	0.038*	0.3	0.636	1.154	1.23	1.436	1.374	0.45*
		97.9	0.178*	0.138*	0.3	0.636	1.254	1.33	1.336	1.174	0.35*
		98	0.178*	0.138*	0.3	0.636	1.254	1.33	1.336	1.174	0.35*
		98.1	0.178*	0.138*	0.3	0.636	1.254	1.33	1.336	1.174	0.35*
		98.2	0.078*	0.138*	0.3	0.636	1.254	1.43	1.336	1.274	0.35*
		98.3	0.078*	0.138*	0.3	0.636	1.154	1.33	1.336	1.274	0.35*
		98.4	0.178*	0.138*	0.2	0.636	1.254	1.33	1.436	1.274	0.25*
		98.5	0.178*	0.138*	0.2	0.736	1.254	1.33	1.436	1.274	0.25*
		98.6	0.178*	0.138*	0.3	0.736	1.254	1.33	1.536	1.374	0.25*
		98.7	0.178*	0.138*	0.3	0.736	1.154	1.23	1.536	1.274	0.25*
		98.8	0.178*	0.138*	0.3	0.736	1.154	1.23	1.536	1.274	0.35*
		98.9	0.178*	0.138*	0.4	0.736	1.154	1.23	1.536	1.274	0.35*
		99	0.178*	0.138*	0.4	0.736	1.154	1.23	1.536	1.274	0.45*
		99.1	0.178*	0.038*	0.4	0.736	1.154	1.23	1.436	1.274	0.45*
		99.2	0.078*	0.038*	0.4	0.736	1.154	1.23	1.336	1.174	0.45*
		99.3	-0.022*	0.038*	0.3	0.636	1.154	1.23	1.336	1.174	0.45*
		99.4	-0.022*	0.038*	0.2	0.636	1.054	1.13	1.336	1.174	0.45*
		99.5	-0.022*	0.038*	0.2	0.636	0.954	1.13	1.336	1.174	0.45*
		99.6	-0.022*	0.038*	0.3	0.636	0.954	1.13	1.336	1.174	0.45*
		99.7	0.178*	0.138*	0.3	0.636	0.954	1.23	1.336	1.174	0.35*
		99.8	0.178*	0.138*	0.3	0.636	0.954	1.23	1.336	1.174	0.35*
		99.9	0.178*	0.138*	0.3	0.736	1.154	1.33	1.436	1.074	0.25*
		100	0.178*	0.138*	0.3	0.736	1.154	1.23	1.436	1.074	0.25*
		100.1	0.178*	0.138*	0.3	0.736	1.154	1.23	1.436	1.074	0.25*
		100.2	0.178*	0.138*	0.3	0.736	1.154	1.23	1.436	1.074	0.25*
		100.3	0.178*	0.138*	0.3	0.636	1.154	1.23	1.436	1.074	0.25*
		100.4	0.178*	0.138*	0.3	0.636	1.054	1.23	1.436	1.074	0.25*
		100.5	0.178*	0.138*	0.4	0.636	1.054	1.23	1.536	1.274	0.25*
		100.6	0.078*	0.238*	0.4	0.636	0.954	1.13	1.436	1.274	0.25*
		100.7	0.078*	0.138*	0.4	0.636	0.954	1.13	1.436	1.274	0.35*
		100.8	0.078*	0.138*	0.4	0.636	0.954	1.13	1.436	1.274	0.35*
		100.9	0.078*	0.138*	0.4	0.636	0.954	1.13	1.336	1.174	0.35*
		101	0.078*	0.138*	0.4	0.636	0.954	1.13	1.336	1.174	0.25*
		101.1	0.078*	0.138*	0.3	0.536	1.054	1.13	1.336	1.174	0.25*
		101.2	0.078*	0.138*	0.4	0.736	1.054	1.13	1.336	1.174	0.25*
		101.3	0.078*	0.138*	0.3	0.736	0.954	1.13	1.336	1.074	0.25*
		101.4	0.178*	0.238*	0.3	0.636	0.954	1.13	1.336	1.074	0.25*
		101.5	0.178*	0.238*	0.3	0.636	0.954	1.13	1.336	1.074	0.25*
		101.6	0.178*	0.238*	0.3	0.636	0.954	1.13	1.436	1.074	0.25*
		101.7	0.178*	0.138*	0.3	0.636	0.954	1.13	1.436	1.174	0.25*
		101.8	0.178*	0.138*	0.4	0.636	0.954	1.13	1.436	1.174	0.25*
		101.9	0.178*	0.138*	0.4	0.636	0.954	1.13	1.336	1.174	0.35*
		102	0.178*	0.138*	0.4	0.636	0.854	1.13	1.336	1.174	0.25*
		102.1	0.278*	0.138*	0.4	0.636	0.854	1.13	1.336	1.174	0.25*
		102.2	0.178*	0.038*	0.4	0.636	0.854	1.13	1.236	1.074	0.25*
		102.3	0.178*	0.038*	0.3	0.536	0.854	1.13	1.236	1.074	0.25*
		102.4	0.178*	0.138*	0.3	0.536	0.854	1.13	1.236	0.974	0.15*
		102.5	0.178*	0.138*	0.3	0.536	0.954	1.13	1.236	0.974	0.15*
		102.6	0.178*	0.138*	0.3	0.536	0.954	1.23	1.336	1.074	0.25*
		102.7	0.178*	0.138*	0.3	0.536	0.954	1.23	1.336	1.074	0.25*
		102.8	0.178*	0.138*	0.2	0.536	0.954	1.23	1.236	1.074	0.25*
		102.9	0.278*	0.238*	0.3	0.636	0.954	1.23	1.236	1.074	0.25*
		103	0.278*	0.238*	0.3	0.736	0.954	1.23	1.236	1.174	0.25*
		103.1	0.178*	0.238*	0.3	0.736	0.854	1.13	1.336	1.174	0.25*
		103.2	0.178*	0.238*	0.3	0.736	0.854	1.13	1.336	1.174	0.25*
		103.3	0.178*	0.238*	0.3	0.636	0.854	1.13	1.336	1.174	0.25*
		103.4	0.178*	0.238*	0.3	0.636	0.854	1.13	1.336	1.174	0.25*
		103.5	0.078*	0.138*	0.4	0.636	0.854	1.13	1.336	1.074	0.25*
		103.6	0.078*	0.138*	0.4	0.636	0.854	1.13	1.336	1.074	0.25*
		103.7	0.078*	0.138*	0.4	0.636	0.854	1.13	1.336	1.074	0.25*
		103.8	0.078*	0.138*	0.4	0.636	0.854	1.13	1.136	0.974	0.35*
		103.9	0.078*	0.138*	0.4	0.636	0.954	1.13	1.136	0.974	0.35*
		104	0.078*	0.138*	0.3	0.536	0.954	1.13	1.136	0.974	0.35*
		104.1	0.178*	0.138*	0.3	0.536	0.954	1.13	1.136	0.974	0.35*
		104.2	0.178*	0.138*	0.3	0.536	0.854	1.13	1.136	1.074	0.25*
		104.3	0.178*	0.138*	0.2	0.536	0.854	1.13	1.136	1.074	0.25*
		104.4	0.178*	0.138*	0.2	0.636	0.854	1.13	1.136	1.074	0.25*
		104.5	0.178*	0.138*	0.3	0.736	0.854	1.13	1.136	1.074	0.25*
		104.6	0.178*	0.138*	0.3	0.736	0.854	1.13	1.136	1.074	0.25*
		104.7	0.178*	0.138*	0.3	0.736	0.854	1.13	1.136	1.074	0.25*
		104.8	0.278*	0.238*	0.3	0.736	0.854	1.13	1.136	1.074	0.25*
		104.9	0.278*	0.238*	0.3	0.736	0.854	1.13	1.136	1.074	0.25*
		105	0.278*	0.238*	0.3	0.736	0.854	1.13	1.136	0.974	0.25*
		105.1	0.278*	0.238*	0.3	0.736	0.854	1.13	1.136	0.974	0.25*
		105.2	0.178*	0.138*	0.2	0.636	0.854	1.13	1.136	0.974	0.25*
		105.3	0.178*	0.138*	0.2	0.636	0.854	1.13	1.136	0.974	0.25*
		105.4	0.178*	0.038*	0.2	0.636	0.754	1.13	1.236	1.074	0.25*
		105.5	0.178*	0.038*	0.3	0.636	0.754	1.03	1.236	1.074	0.35*
		105.6	0.178*	0.038*	0.3	0.636	0.854	1.13	1.136	0.974	0.35*
		105.7	0.178*	0.138*	0.3	0.636	0.854	1.13	1.136	0.974	0.35*
		105.8	0.178*	0.138*	0.3	0.636	0.854	1.13	1.136	0.974	0.35*
		105.9	0.178*	0.138*	0.2	0.536	0.854	1.13	1.136	0.974	0.35*
		106	0.178*	0.138*	0.2	0.536	0.854	1.13	1.136	0.974	0.35*
		106.1	0.178*	0.138*	0.3	0.636	0.854	1.13	1.036	0.974	0.35*
		106.2	0.178*	0.138*	0.3	0.636	0.854	1.13	1.036	0.974	0.25*
		106.3	0.278*	0.138*	0.3	0.636	0.854	1.13	1.136	0.974	0.25*
		106.4	0.278*	0.138*	0.3	0.736	0.854	1.03	1.136	0.974	0.25*
		106.5	0.178*	0.038*	0.2	0.636	0.854	1.03	1.136	0.974	0.25*
		106.6	0.178*	0.038*	0.2	0.636	0.854	1.03	1.136	0.974	0.25*
		106.7	0.178*	0.038*	0.2	0.636	0.854	1.03	1.136	0.974	0.25*
		106.8	0.078*	0.038*	0.2	0.636	0.854	1.03	1.136	0.974	0.25*
		106.9	0.078*	0.038*	0.3	0.636	0.854	1.03	1.136	0.974	0.35*
		107	0.078*	0.038*	0.3	0.636	0.754	0.93	1.136	0.974	0.35*
		107.1	0.078*	0.038*	0.3	0.636	0.654	0.83	1.136	0.974	0.35*
		107.2	0.078*	0.038*	0.3	0.636	0.654	0.83	1.136	0.974	0.35*
		107.3	0.178*	0.138*	0.3	0.636	0.654	0.83	1.136	1.074	0.35*
		107.4	0.178*	0.038*	0.3	0.636	0.654	0.83	1.136	0.974	0.35*
		107.5	0.178*	0.038*	0.3	0.636	0.754	0.83	1.036	0.874	0.35*
		107.6	0.178*	0.138*	0.3	0.636	0.754	0.83	1.036	0.874	0.35*
		107.7	0.178*	0.138*	0.3	0.636	0.754	0.83	1.036	0.874	0.35*
		107.8	0.178*	0.138*	0.2	0.536	0.754	0.83	1.136	0.974	0.35*
		107.9	0.178*	0.138*	0.3	0.436	0.754	0.93	1.136	0.974	0.25*
		108	0.178*	0.138*	0.3	0.536	0.754	0.83	1.136	0.974	0.25*
		108.1	0.178*	0.138*	0.3	0.536	0.754	0.83	1.136	0.974	0.25*
		108.2	0.178*	0.138*	0.3	0.536	0.754	0.83	1.136	0.974	0.25*
		108.3	0.278*	0.138*	0.3	0.536	0.754	0.83	1.136	0.974	0.25*
		108.4	0.278*	0.138*	0.3	0.536	0.854	0.93	1.136	0.974	0.35*
		108.5	0.278*	0.138*	0.3	0.536	0.754	0.83	1.136	0.974	0.35*
		108.6	0.278*	0.138*	0.3	0.636	0.754	0.83	1.136	0.874	0.35*
		108.7	0.178*	0.038*	0.2	0.536	0.754	0.83	1.136	0.874	0.35*
		108.8	0.178*	0.038*	0.2	0.536	0.654	0.83	1.036	0.874	0.35*
		108.9	0.178*	0.038*	0.2	0.536	0.654	0.83	1.136	0.974	0.35*
		109	0.178*	0.038*	0.2	0.536	0.654	0.83	1.136	0.974	0.35*
		109.1	0.078*	0.038*	0.2	0.536	0.654	0.83	1.136	0.974	0.35*
		109.2	0.078*	0.038*	0.3	0.536	0.654	0.83	1.136	1.074	0.35*
		109.3	0.078*	0.038*	0.3	0.536	0.654	0.73	1.136	1.074	0.35*
		109.4	0.078*	0.138*	0.3	0.436	0.654	0.73	1.136	1.074	0.25*
		109.5	0.178*	0.238*	0.3	0.436	0.654	0.73	1.236	0.974	0.25*
		109.6	0.178*	0.138*	0.2	0.436	0.654	0.73	1.236	0.974	0.35*
		109.7	0.278*	0.138*	0.2	0.436	0.754	0.73	1.236	0.974	0.35*
		109.8	0.278*	0.138*	0.2	0.436	0.654	0.63	1.236	0.974	0.25*
		109.9	0.278*	0.138*	0.2	0.436	0.654	0.63	1.236	0.974	0.25*
		110	0.278*	0.138*	0.3	0.536	0.654	0.63	1.136	0.874	0.25*
		110.1	0.278*	0.138*	0.3	0.536	0.654	0.63	1.136	0.874	0.25*
		110.2	0.278*	0.138*	0.4	0.536	0.654	0.63	1.136	0.874	0.25*
		110.3	0.178*	0.038*	0.4	0.536	0.654	0.63	1.136	0.874	0.15*
		110.4	0.178*	0.038*	0.3	0.436	0.654	0.63	1.036	0.874	0.15*
		110.5	0.178*	0.038*	0.3	0.436	0.654	0.63	1.136	0.974	0.25*
		110.6	0.078*	0.038*	0.3	0.436	0.654	0.63	1.136	0.974	0.25*
		110.7	0.078*	0.038*	0.3	0.436	0.654	0.83	1.136	0.974	0.25*
		110.8	0.078*	0.038*	0.3	0.436	0.654	0.83	1.136	0.974	0.25*
		110.9	0.078*	0.038*	0.3	0.436	0.654	0.83	1.136	0.974	0.25*
		111	0.078*	0.038*	0.3	0.436	0.654	0.83	1.136	0.974	0.25*
		111.1	0.178*	0.138*	0.3	0.436	0.654	0.83	1.136	0.974	0.25*
		111.2	0.178*	0.138*	0.3	0.436	0.654	0.83	1.136	0.874	0.25*
		111.3	0.278*	0.238*	0.2	0.436	0.554	0.73	1.236	0.874	0.25*
		111.4	0.178*	0.038*	0.2	0.436	0.554	0.73	1.236	0.874	0.25*
		111.5	0.178*	0.038*	0.2	0.436	0.554	0.73	1.136	0.774	0.15*
		111.6	0.178*	0.038*	0.3	0.436	0.554	0.73	1.036	0.774	0.15*
		111.7	0.178*	0.038*	0.3	0.436	0.554	0.73	1.036	0.774	0.25*
		111.8	0.178*	0.038*	0.3	0.436	0.554	0.73	1.036	0.774	0.25*
		111.9	0.178*	0.038*	0.2	0.336	0.554	0.63	1.036	0.774	0.15*
		112	0.178*	0.038*	0.2	0.336	0.554	0.63	1.136	0.974	0.15*
		112.1	0.178*	0.038*	0.3	0.436	0.554	0.63	1.136	0.974	0.15*
		112.2	0.178*	0.038*	0.3	0.436	0.554	0.63	1.136	0.974	0.25*
		112.3	0.178*	0.038*	0.3	0.436	0.554	0.63	1.136	0.974	0.25*
		112.4	0.178*	0.038*	0.3	0.436	0.554	0.63	1.136	0.874	0.25*
		112.5	0.178*	0.038*	0.3	0.436	0.554	0.73	1.136	0.874	0.25*
		112.6	0.178*	0.038*	0.3	0.436	0.554	0.83	1.136	0.874	0.15*
		112.7	0.078*	0.038*	0.3	0.336	0.554	0.83	1.136	0.874	0.15*
		112.8	0.078*	0.038*	0.2	0.336	0.554	0.83	1.036	0.874	0.15*
		112.9	0.078*	0.038*	0.3	0.436	0.654	0.83	1.036	0.874	0.15*
		113	0.078*	0.038*	0.3	0.436	0.554	0.73	0.936	0.774	0.15*
		113.1	0.078*	0.038*	0.3	0.436	0.554	0.73	1.036	0.874	0.15*
		113.2	0.078*	0.038*	0.3	0.436	0.554	0.73	1.036	0.874	0.15*
		113.3	0.078*	0.138*	0.3	0.436	0.554	0.73	1.036	0.874	0.15*
		113.4	0.078*	0.138*	0.3	0.436	0.554	0.73	1.036	0.874	0.15*
		113.5	0.078*	0.038*	0.4	0.536	0.554	0.63	1.036	0.874	0.15*
		113.6	0.078*	0.038*	0.4	0.536	0.554	0.63	1.036	0.774	0.15*
		113.7	0.178*	0.038*	0.4	0.536	0.454	0.63	1.036	0.774	0.15*
		113.8	0.178*	0.038*	0.4	0.636	0.454	0.63	1.036	0.774	0.15*
		113.9	0.178*	0.138*	0.3	0.536	0.454	0.63	0.936	0.774	0.15*
		114	0.078*	0.038*	0.3	0.536	0.454	0.63	0.936	0.774	0.25*
		114.1	0.078*	0.038*	0.3	0.536	0.354	0.63	0.936	0.774	0.25*
		114.2	0.078*	0.038*	0.3	0.536	0.354	0.63	0.936	0.774	0.25*
		114.3	0.078*	0.038*	0.3	0.536	0.354	0.63	0.936	0.774	0.15*
		114.4	0.078*	0.038*	0.3	0.536	0.354	0.63	0.936	0.774	0.15*
		114.5	0.078*	0.038*	0.3	0.536	0.454	0.73	0.936	0.874	0.15*
		114.6	0.078*	0.038*	0.3	0.536	0.454	0.63	0.836	0.774	0.25*
		114.7	0.078*	0.038*	0.3	0.536	0.454	0.63	0.936	0.774	0.25*
		114.8	0.078*	-0.062*	0.3	0.436	0.554	0.63	0.936	0.774	0.25*
		114.9	0.178*	0.138*	0.3	0.436	0.554	0.63	0.936	0.774	0.25*
		115	0.178*	0.138*	0.3	0.436	0.554	0.63	0.936	0.774	0.25*
		115.1	0.178*	0.138*	0.3	0.436	0.554	0.63	1.036	0.874	0.25*
		115.2	0.178*	0.138*	0.3	0.536	0.554	0.63	1.036	0.874	0.25*
		115.3	0.178*	0.138*	0.3	0.536	0.554	0.63	0.936	0.874	0.25*
		115.4	0.078*	0.138*	0.2	0.536	0.554	0.63	0.936	0.874	0.15*
		115.5	0.178*	0.138*	0.2	0.536	0.554	0.63	0.936	0.774	0.15*
		115.6	0.178*	0.138*	0.2	0.536	0.554	0.73	0.936	0.774	0.15*
		115.7	0.178*	0.138*	0.2	0.536	0.554	0.73	0.836	0.774	0.15*
		115.8	0.178*	0.238*	0.2	0.536	0.454	0.63	0.836	0.774	0.25*
		115.9	0.178*	0.238*	0.2	0.536	0.454	0.63	0.836	0.774	0.25*
		116	0.178*	0.238*	0.2	0.536	0.554	0.63	0.836	0.774	0.15*
		116.1	0.178*	0.238*	0.2	0.536	0.554	0.63	0.936	0.774	0.15*
		116.2	0.078*	0.138*	0.3	0.436	0.554	0.63	0.936	0.774	0.15*
		116.3	0.078*	0.138*	0.3	0.436	0.554	0.63	0.936	0.774	0.15*
		116.4	0.078*	0.138*	0.3	0.436	0.554	0.63	0.936	0.774	0.15*
		116.5	0.078*	0.138*	0.3	0.436	0.454	0.63	0.936	0.774	0.15*
		116.6	0.078*	0.138*	0.2	0.436	0.454	0.63	0.936	0.774	0.25*
		116.7	0.078*	0.138*	0.2	0.436	0.454	0.63	0.936	0.774	0.25*
		116.8	0.078*	0.138*	0.2	0.436	0.454	0.63	0.936	0.774	0.25*
		116.9	0.178*	0.038*	0.2	0.436	0.454	0.63	0.936	0.774	0.25*
		117	0.178*	0.038*	0.2	0.436	0.454	0.73	0.936	0.774	0.25*
		117.1	0.178*	0.138*	0.2	0.436	0.454	0.73	0.936	0.774	0.25*
		117.2	0.178*	0.138*	0.2	0.436	0.554	0.73	0.936	0.774	0.25*
		117.3	0.178*	0.138*	0.2	0.436	0.554	0.73	0.836	0.674	0.25*
		117.4	0.178*	0.138*	0.2	0.436	0.554	0.73	0.836	0.674	0.25*
		117.5	0.078*	0.138*	0.2	0.436	0.554	0.63	0.836	0.674	0.25*
		117.6	0.078*	0.138*	0.3	0.536	0.454	0.53	0.836	0.674	0.25*
		117.7	0.178*	0.238*	0.3	0.536	0.454	0.53	0.736	0.674	0.25*
		117.8	0.178*	0.238*	0.3	0.536	0.454	0.53	0.736	0.774	0.35*
		117.9	0.178*	0.238*	0.3	0.536	0.454	0.53	0.736	0.774	0.15*
		118	0.178*	0.238*	0.3	0.536	0.454	0.53	0.836	0.874	0.15*
		118.1	0.178*	0.238*	0.3	0.536	0.454	0.53	0.936	0.874	0.15*
		118.2	0.178*	0.238*	0.3	0.536	0.454	0.53	0.836	0.774	0.15*
		118.3	0.178*	0.138*	0.3	0.636	0.454	0.53	0.836	0.774	0.15*
		118.4	0.178*	0.238*	0.3	0.636	0.454	0.63	0.836	0.774	0.15*
		118.5	0.178*	0.238*	0.3	0.636	0.454	0.63	0.836	0.674	0.15*
		118.6	0.178*	0.238*	0.3	0.536	0.454	0.63	0.836	0.674	0.15*
		118.7	0.178*	0.238*	0.3	0.536	0.454	0.63	0.836	0.674	0.15*
		118.8	0.178*	0.238*	0.3	0.536	0.554	0.73	0.836	0.674	0.15*
		118.9	0.278*	0.238*	0.2	0.436	0.554	0.73	0.736	0.674	0.25*
		119	0.278*	0.238*	0.2	0.436	0.554	0.73	0.736	0.674	0.25*
		119.1	0.278*	0.238*	0.2	0.436	0.454	0.73	0.736	0.674	0.25*
		119.2	0.278*	0.238*	0.2	0.436	0.454	0.73	0.736	0.674	0.25*
		119.3	0.278*	0.238*	0.2	0.436	0.454	0.63	0.736	0.674	0.25*
		119.4	0.178*	0.138*	0.2	0.436	0.454	0.63	0.836	0.674	0.25*
		119.5	0.278*	0.238*	0.2	0.436	0.554	0.63	0.836	0.674	0.25*
		119.6	0.178*	0.138*	0.2	0.436	0.554	0.63	0.836	0.674	0.25*
		119.7	0.178*	0.138*	0.2	0.436	0.554	0.63	0.836	0.574	0.25*
		119.8	0.178*	0.038*	0.2	0.436	0.454	0.53	0.836	0.574	0.25*
		119.9	0.078*	0.038*	0.2	0.436	0.454	0.63	0.836	0.574	0.25*
		120	0.078*	0.138*	0.2	0.436	0.454	0.63	0.836	0.674	0.25*
		120.1	0.078*	0.138*	0.2	0.436	0.454	0.63	0.836	0.674	0.15*
		120.2	0.078*	0.138*	0.2	0.436	0.454	0.63	0.736	0.674	0.15*
		120.3	0.078*	0.138*	0.2	0.436	0.454	0.63	0.736	0.674	0.15*
		120.4	0.178*	0.238*	0.2	0.436	0.454	0.63	0.736	0.674	0.15*
		120.5	0.178*	0.238*	0.2	0.436	0.454	0.53	0.736	0.674	0.15*
		120.6	0.178*	0.238*	0.3	0.536	0.454	0.53	0.736	0.674	0.15*
		120.7	0.178*	0.238*	0.3	0.636	0.454	0.53	0.736	0.674	0.15*
		120.8	0.178*	0.138*	0.3	0.636	0.454	0.53	0.736	0.674	0.25*
		120.9	0.178*	0.138*	0.3	0.636	0.354	0.53	0.736	0.574	0.25*
		121	0.178*	0.138*	0.3	0.636	0.354	0.53	0.736	0.574	0.35*
		121.1	0.178*	0.138*	0.2	0.536	0.354	0.53	0.736	0.474	0.35*
		121.2	0.178*	0.138*	0.2	0.436	0.454	0.53	0.736	0.474	0.35*
		121.3	0.278*	0.138*	0.2	0.436	0.454	0.53	0.736	0.474	0.35*
		121.4	0.278*	0.138*	0.2	0.436	0.454	0.53	0.736	0.474	0.35*
		121.5	0.278*	0.138*	0.1	0.436	0.554	0.63	0.636	0.574	0.35*
		121.6	0.278*	0.138*	0.2	0.436	0.554	0.63	0.636	0.574	0.35*
		121.7	0.278*	0.038*	0.2	0.436	0.554	0.53	0.636	0.574	0.35*
		121.8	0.278*	0.038*	0.2	0.436	0.454	0.43	0.736	0.674	0.25*
		121.9	0.078*	-0.062*	0.2	0.436	0.454	0.53	0.736	0.674	0.25*
		122	0.178*	-0.062*	0.2	0.436	0.454	0.53	0.736	0.674	0.15*
		122.1	0.178*	0.038*	0.2	0.436	0.454	0.53	0.736	0.574	0.15*
		122.2	0.078*	0.038*	0.2	0.436	0.454	0.53	0.836	0.574	0.15*
		122.3	0.078*	0.038*	0.2	0.436	0.454	0.53	0.836	0.574	0.15*
		122.4	0.078*	0.038*	0.2	0.536	0.454	0.53	0.836	0.574	0.25*
		122.5	0.078*	0.038*	0.2	0.536	0.454	0.53	0.736	0.474	0.25*
		122.6	0.078*	0.038*	0.1	0.436	0.454	0.53	0.736	0.474	0.25*
		122.7	0.078*	0.038*	0.1	0.436	0.554	0.53	0.736	0.474	0.25*
		122.8	0.178*	0.138*	0.2	0.536	0.554	0.53	0.636	0.474	0.25*
		122.9	0.178*	0.138*	0.2	0.536	0.554	0.53	0.636	0.474	0.25*
		123	0.178*	0.138*	0.2	0.536	0.554	0.53	0.636	0.474	0.25*
		123.1	0.178*	0.138*	0.2	0.536	0.554	0.53	0.636	0.474	0.25*
		123.2	0.178*	0.138*	0.2	0.536	0.554	0.53	0.636	0.474	0.25*
		123.3	0.178*	0.138*	0.2	0.536	0.554	0.53	0.636	0.474	0.25*
		123.4	0.178*	0.138*	0.1	0.536	0.554	0.53	0.736	0.674	0.25*
		123.5	0.178*	0.138*	0.2	0.536	0.554	0.53	0.736	0.674	0.25*
		123.6	0.178*	0.138*	0.2	0.536	0.354	0.33	0.736	0.574	0.25*
		123.7	0.178*	0.138*	0.2	0.536	0.354	0.33	0.736	0.574	0.15*
		123.8	0.178*	0.138*	0.2	0.636	0.354	0.33	0.736	0.574	0.15*
		123.9	0.078*	0.038*	0.1	0.536	0.354	0.33	0.736	0.574	0.25*
		124	0.078*	0.038*	0.1	0.436	0.354	0.43	0.836	0.574	0.35*
		124.1	0.178*	0.038*	0.1	0.436	0.454	0.43	0.836	0.574	0.35*
		124.2	0.178*	0.038*	0.1	0.436	0.454	0.43	0.836	0.574	0.35*
		124.3	0.178*	0.038*	0.1	0.436	0.454	0.43	0.836	0.574	0.35*
		124.4	0.178*	0.038*	0.1	0.436	0.454	0.43	0.836	0.574	0.35*
		124.5	0.178*	0.038*	0.2	0.436	0.554	0.53	0.736	0.574	0.25*
		124.6	0.178*	0.038*	0.2	0.436	0.554	0.53	0.736	0.574	0.25*
		124.7	0.278*	0.138*	0.2	0.436	0.554	0.53	0.736	0.574	0.25*
		124.8	0.278*	0.138*	0.2	0.436	0.554	0.53	0.736	0.574	0.15*
		124.9	0.278*	0.138*	0.3	0.536	0.554	0.53	0.636	0.474	0.15*
		125	0.278*	0.138*	0.3	0.636	0.554	0.53	0.636	0.574	0.15*
		125.1	0.278*	0.138*	0.3	0.636	0.554	0.53	0.636	0.574	0.15*
		125.2	0.278*	0.138*	0.2	0.536	0.554	0.53	0.636	0.574	0.15*
		125.3	0.278*	0.138*	0.2	0.536	0.554	0.53	0.636	0.574	0.15*
		125.4	0.278*	0.138*	0.2	0.536	0.554	0.53	0.636	0.574	0.15*
		125.5	0.178*	0.038*	0.2	0.536	0.454	0.53	0.636	0.574	0.15*
		125.6	0.278*	0.038*	0.2	0.536	0.454	0.53	0.636	0.574	0.15*
		125.7	0.278*	0.138*	0.3	0.536	0.354	0.43	0.636	0.574	0.15*
		125.8	0.278*	0.138*	0.2	0.536	0.354	0.43	0.636	0.574	0.15*
		125.9	0.278*	0.138*	0.2	0.436	0.354	0.43	0.536	0.474	0.15*
		126	0.278*	0.138*	0.2	0.436	0.354	0.43	0.536	0.474	0.25*
		126.1	0.278*	0.138*	0.2	0.436	0.354	0.43	0.536	0.474	0.25*
		126.2	0.278*	0.138*	0.2	0.436	0.454	0.43	0.536	0.474	0.25*
		126.3	0.278*	0.138*	0.2	0.436	0.454	0.43	0.536	0.474	0.25*
		126.4	0.278*	0.138*	0.2	0.436	0.454	0.43	0.636	0.574	0.25*
		126.5	0.378*	0.238*	0.2	0.436	0.454	0.43	0.636	0.574	0.15*
		126.6	0.378*	0.238*	0.3	0.436	0.454	0.43	0.736	0.574	0.15*
		126.7	0.378*	0.238*	0.3	0.536	0.454	0.43	0.736	0.574	0.15*
		126.8	0.378*	0.238*	0.3	0.536	0.454	0.43	0.636	0.474	0.15*
		126.9	0.278*	0.238*	0.3	0.536	0.454	0.43	0.636	0.474	0.15*
		127	0.278*	0.238*	0.4	0.636	0.454	0.43	0.636	0.474	0.15*
		127.1	0.378*	0.238*	0.4	0.636	0.454	0.43	0.636	0.374	0.15*
		127.2	0.278*	0.138*	0.4	0.636	0.354	0.33	0.636	0.374	0.15*
		127.3	0.278*	0.138*	0.3	0.536	0.454	0.43	0.636	0.474	0.15*
		127.4	0.278*	0.138*	0.3	0.536	0.454	0.43	0.636	0.474	0.25*
		127.5	0.278*	0.138*	0.3	0.536	0.454	0.43	0.536	0.474	0.25*
		127.6	0.278*	0.138*	0.3	0.536	0.454	0.43	0.536	0.474	0.15*
		127.7	0.278*	0.138*	0.3	0.536	0.554	0.43	0.536	0.474	0.05*
		127.8	0.278*	0.138*	0.3	0.536	0.454	0.43	0.536	0.474	0.05*
		127.9	0.278*	0.138*	0.3	0.436	0.454	0.53	0.536	0.474	0.05*
		128	0.278*	0.238*	0.3	0.436	0.454	0.53	0.536	0.474	0.05*
		128.1	0.278*	0.238*	0.3	0.436	0.454	0.53	0.536	0.474	0.05*
		128.2	0.278*	0.238*	0.2	0.436	0.454	0.53	0.536	0.474	0.05*
		128.3	0.278*	0.238*	0.2	0.436	0.454	0.53	0.536	0.474	0.05*
		128.4	0.278*	0.238*	0.2	0.436	0.454	0.53	0.436	0.374	0.15*
		128.5	0.278*	0.238*	0.2	0.436	0.454	0.43	0.436	0.374	0.15*
		128.6	0.278*	0.138*	0.2	0.436	0.454	0.43	0.536	0.374	0.15*
		128.7	0.378*	0.238*	0.2	0.436	0.454	0.43	0.536	0.374	0.15*
		128.8	0.378*	0.238*	0.3	0.536	0.354	0.33	0.536	0.374	0.15*
		128.9	0.178*	0.138*	0.2	0.436	0.454	0.43	0.536	0.274	0.15*
		129	0.178*	0.238*	0.2	0.436	0.454	0.53	0.536	0.274	0.15*
		129.1	0.178*	0.238*	0.3	0.436	0.554	0.53	0.436	0.274	0.15*
		129.2	0.178*	0.238*	0.3	0.436	0.554	0.53	0.436	0.274	0.15*
		129.3	0.278*	0.238*	0.3	0.436	0.554	0.53	0.436	0.274	0.15*
		129.4	0.278*	0.238*	0.3	0.436	0.554	0.53	0.436	0.274	0.15*
		129.5	0.278*	0.138*	0.3	0.436	0.554	0.53	0.436	0.274	0.15*
		129.6	0.278*	0.138*	0.3	0.436	0.554	0.53	0.436	0.274	0.15*
		129.7	0.278*	0.138*	0.3	0.436	0.554	0.53	0.436	0.274	0.15*
		129.8	0.278*	0.238*	0.3	0.336	0.554	0.53	0.536	0.374	0.15*
		129.9	0.278*	0.238*	0.3	0.336	0.554	0.43	0.536	0.374	0.15*
		130	0.278*	0.238*	0.4	0.436	0.554	0.43	0.436	0.274	0.15*
		130.1	0.278*	0.238*	0.4	0.436	0.554	0.43	0.436	0.274	0.25*
		130.2	0.178*	0.138*	0.3	0.436	0.554	0.43	0.436	0.274	0.25*
		130.3	0.278*	0.238*	0.3	0.536	0.554	0.53	0.436	0.274	0.15*
		130.4	0.278*	0.238*	0.3	0.536	0.554	0.53	0.436	0.274	0.15*
		130.5	0.278*	0.238*	0.3	0.536	0.554	0.53	0.436	0.274	0.05*
		130.6	0.278*	0.238*	0.3	0.536	0.554	0.53	0.436	0.274	0.05*
		130.7	0.278*	0.238*	0.2	0.436	0.554	0.53	0.436	0.274	0.05*
		130.8	0.178*	0.238*	0.2	0.436	0.554	0.53	0.436	0.274	0.05*
		130.9	0.178*	0.238*	0.2	0.436	0.554	0.53	0.436	0.274	0.05*
		131	0.178*	0.238*	0.2	0.436	0.554	0.53	0.436	0.274	0.05*
		131.1	0.178*	0.238*	0.2	0.436	0.554	0.53	0.436	0.274	0.05*
		131.2	0.178*	0.238*	0.2	0.436	0.554	0.43	0.436	0.274	0.05*
		131.3	0.178*	0.238*	0.2	0.336	0.554	0.43	0.436	0.274	0.05*
		131.4	0.178*	0.238*	0.2	0.336	0.554	0.43	0.436	0.274	0.05*
		131.5	0.178*	0.138*	0.2	0.336	0.554	0.53	0.436	0.274	0.05*
		131.6	0.178*	0.138*	0.2	0.336	0.554	0.53	0.436	0.174	0.05*
		131.7	0.078*	0.038*	0.2	0.336	0.554	0.53	0.436	0.174	0.05*
		131.8	0.078*	0.138*	0.2	0.336	0.554	0.53	0.536	0.274	0.05*
		131.9	0.078*	0.138*	0.2	0.336	0.554	0.53	0.536	0.274	0.15*
		132	0.078*	0.138*	0.2	0.336	0.554	0.53	0.536	0.374	0.25*
		132.1	0.078*	0.138*	0.2	0.336	0.554	0.53	0.536	0.374	0.25*
		132.2	0.078*	0.138*	0.2	0.336	0.454	0.43	0.536	0.374	0.25*
		132.3	0.178*	0.138*	0.2	0.336	0.554	0.43	0.536	0.374	0.15*
		132.4	0.178*	0.138*	0.2	0.336	0.554	0.43	0.436	0.374	0.15*
		132.5	0.178*	0.138*	0.2	0.336	0.654	0.53	0.436	0.274	0.15*
		132.6	0.178*	0.138*	0.2	0.436	0.654	0.53	0.436	0.274	0.05*
		132.7	0.178*	0.038*	0.2	0.436	0.654	0.53	0.436	0.274	0.05*
		132.8	0.178*	0.038*	0.2	0.436	0.654	0.53	0.436	0.274	0.05*
		132.9	0.078*	-0.062*	0.2	0.436	0.654	0.53	0.436	0.274	0.05*
		133	0.078*	0.038*	0.2	0.336	0.554	0.53	0.436	0.274	0.05*
		133.1	0.078*	0.038*	0.2	0.336	0.554	0.43	0.436	0.274	0.05*
		133.2	0.078*	0.138*	0.2	0.336	0.554	0.43	0.436	0.274	0.05*
		133.3	0.078*	0.138*	0.2	0.336	0.554	0.43	0.436	0.274	0.05*
		133.4	0.078*	0.138*	0.3	0.336	0.554	0.43	0.436	0.274	0.05*
		133.5	0.078*	0.138*	0.3	0.336	0.554	0.43	0.536	0.274	0.05*
		133.6	0.078*	0.138*	0.3	0.336	0.554	0.43	0.536	0.274	0.05*
		133.7	0.078*	0.138*	0.2	0.336	0.554	0.43	0.436	0.174	0.15*
		133.8	0.078*	0.138*	0.2	0.336	0.554	0.43	0.536	0.274	0.15*
		133.9	0.078*	0.038*	0.1	0.236	0.554	0.43	0.536	0.274	0.15*
		134	0.078*	0.038*	0.1	0.236	0.554	0.43	0.536	0.274	0.15*
		134.1	0.078*	0.038*	0.1	0.236	0.554	0.53	0.536	0.274	0.15*
		134.2	0.078*	0.038*	0.1	0.236	0.554	0.53	0.536	0.274	0.25*
		134.3	0.078*	0.038*	0.1	0.236	0.554	0.53	0.536	0.274	0.25*
		134.4	0.078*	0.038*	0.1	0.236	0.554	0.53	0.536	0.274	0.25*
		134.5	0.078*	0.038*	0.1	0.236	0.554	0.53	0.536	0.274	0.25*
		134.6	0.078*	0.038*	0.2	0.336	0.454	0.43	0.536	0.274	0.25*
		134.7	0.078*	-0.062*	0.2	0.336	0.554	0.43	0.536	0.274	0.25*
		134.8	0.078*	-0.062*	0.3	0.336	0.454	0.43	0.536	0.274	0.25*
		134.9	0.078*	0.038*	0.3	0.336	0.454	0.43	0.536	0.274	0.25*
		135	0.078*	0.038*	0.3	0.336	0.454	0.43	0.636	0.374	0.25*
		135.1	0.078*	0.038*	0.3	0.236	0.454	0.33	0.636	0.474	0.25*
		135.2	0.178*	0.138*	0.3	0.236	0.454	0.33	0.436	0.374	0.25*
		135.3	0.178*	0.138*	0.3	0.236	0.454	0.33	0.436	0.274	0.25*
		135.4	0.178*	0.138*	0.3	0.336	0.554	0.43	0.436	0.274	0.25*
		135.5	0.178*	0.138*	0.2	0.336	0.554	0.43	0.436	0.274	0.25*
		135.6	0.178*	0.138*	0.2	0.336	0.554	0.43	0.536	0.274	0.15*
		135.7	0.178*	0.138*	0.2	0.336	0.554	0.43	0.536	0.274	0.05*
		135.8	0.078*	0.138*	0.1	0.236	0.554	0.43	0.536	0.274	0.05*
		135.9	0.078*	0.138*	0.2	0.236	0.554	0.43	0.536	0.274	0.15*
		136	0.078*	0.038*	0.2	0.236	0.454	0.43	0.536	0.274	0.25*
		136.1	0.178*	0.038*	0.2	0.236	0.354	0.33	0.536	0.274	0.25*
		136.2	0.178*	0.138*	0.2	0.236	0.454	0.33	0.536	0.274	0.25*
		136.3	0.178*	0.138*	0.2	0.236	0.454	0.33	0.536	0.274	0.25*
		136.4	0.178*	0.138*	0.2	0.236	0.454	0.33	0.536	0.274	0.25*
		136.5	0.078*	0.038*	0.2	0.236	0.454	0.33	0.536	0.274	0.25*
		136.6	0.078*	0.038*	0.2	0.236	0.454	0.43	0.636	0.374	0.25*
		136.7	0.078*	0.038*	0.2	0.236	0.454	0.43	0.536	0.274	0.25*
		136.8	0.078*	0.038*	0.3	0.336	0.454	0.43	0.636	0.374	0.25*
		136.9	0.078*	0.038*	0.3	0.336	0.454	0.43	0.536	0.274	0.25*
		137	0.078*	0.038*	0.2	0.236	0.454	0.43	0.536	0.174	0.25*
		137.1	0.078*	0.038*	0.2	0.236	0.454	0.33	0.536	0.174	0.25*
		137.2	-0.022*	0.038*	0.1	0.136	0.454	0.33	0.536	0.174	0.15*
		137.3	0.178*	0.138*	0.1	0.136	0.554	0.33	0.536	0.174	0.15*
		137.4	0.178*	0.138*	0.1	0.236	0.554	0.33	0.536	0.174	0.15*
		137.5	0.178*	0.138*	0.1	0.236	0.654	0.43	0.536	0.174	0.15*
		137.6	0.178*	0.238*	0.2	0.236	0.654	0.43	0.636	0.174	0.15*
		137.7	0.178*	0.238*	0.2	0.236	0.554	0.43	0.536	0.174	0.15*
		137.8	0.178*	0.238*	0.2	0.236	0.554	0.43	0.536	0.174	0.15*
		137.9	0.178*	0.238*	0.2	0.236	0.454	0.33	0.536	0.174	0.25*
		138	0.178*	0.238*	0.2	0.236	0.454	0.33	0.536	0.174	0.35*
		138.1	0.178*	0.138*	0.2	0.236	0.454	0.33	0.536	0.274	0.35*
		138.2	0.078*	0.038*	0.2	0.236	0.454	0.33	0.536	0.274	0.35*
		138.3	0.078*	0.038*	0.2	0.236	0.454	0.33	0.536	0.274	0.25*
		138.4	0.078*	0.038*	0.2	0.236	0.454	0.33	0.436	0.174	0.25*
		138.5	0.078*	0.038*	0.2	0.336	0.454	0.43	0.536	0.274	0.25*
		138.6	0.078*	0.038*	0.2	0.336	0.454	0.43	0.536	0.274	0.25*
		138.7	0.078*	0.038*	0.2	0.336	0.454	0.33	0.536	0.274	0.25*
		138.8	0.178*	0.038*	0.2	0.336	0.454	0.33	0.536	0.274	0.25*
		138.9	0.178*	0.038*	0.2	0.336	0.554	0.43	0.536	0.274	0.25*
		139	0.178*	0.038*	0.2	0.336	0.554	0.43	0.536	0.174	0.25*
		139.1	0.178*	0.038*	0.3	0.436	0.454	0.43	0.536	0.174	0.25*
		139.2	0.178*	0.038*	0.3	0.436	0.554	0.43	0.536	0.174	0.15*
		139.3	0.178*	0.038*	0.3	0.436	0.554	0.43	0.336	0.074	0.15*
		139.4	0.178*	0.138*	0.3	0.436	0.554	0.43	0.336	0.074	0.15*
		139.5	0.078*	0.138*	0.2	0.436	0.454	0.33	0.336	0.074	0.15*
		139.6	0.078*	0.138*	0.2	0.336	0.454	0.33	0.336	0.074	0.15*
		139.7	0.078*	0.138*	0.2	0.436	0.454	0.33	0.436	0.074	0.15*
		139.8	0.178*	0.238*	0.3	0.436	0.454	0.33	0.536	0.174	0.15*
		139.9	0.178*	0.238*	0.3	0.436	0.454	0.43	0.536	0.274	0.15*
		140	0.178*	0.238*	0.3	0.436	0.454	0.33	0.536	0.274	0.15*
		140.1	0.078*	0.138*	0.3	0.436	0.454	0.33	0.536	0.274	0.15*
		140.2	0.078*	0.138*	0.2	0.336	0.454	0.33	0.536	0.274	0.15*
		140.3	0.078*	0.138*	0.2	0.336	0.454	0.33	0.536	0.274	0.15*
		140.4	0.078*	0.138*	0.2	0.336	0.554	0.33	0.536	0.274	0.15*
		140.5	0.078*	0.138*	0.2	0.336	0.554	0.43	0.536	0.274	0.05*
		140.6	0.078*	0.038*	0.2	0.336	0.554	0.43	0.536	0.174	0.05*
		140.7	0.178*	0.038*	0.2	0.336	0.554	0.43	0.536	0.174	0.05*
		140.8	0.178*	0.038*	0.2	0.336	0.454	0.33	0.336	0.174	0.05*
		140.9	0.178*	0.038*	0.2	0.336	0.454	0.33	0.336	0.074	0.05*
		141	0.178*	0.038*	0.2	0.436	0.454	0.33	0.336	0.074	0.05*
		141.1	0.178*	0.038*	0.2	0.336	0.454	0.33	0.336	0.174	0.15*
		141.2	0.178*	0.038*	0.3	0.436	0.454	0.33	0.336	0.174	0.15*
		141.3	0.178*	0.038*	0.3	0.436	0.454	0.33	0.336	0.174	0.15*
		141.4	0.178*	0.038*	0.3	0.436	0.454	0.43	0.336	0.174	0.15*
		141.5	0.178*	0.238*	0.3	0.436	0.454	0.43	0.336	0.174	0.15*
		141.6	0.178*	0.238*	0.3	0.436	0.454	0.43	0.336	0.174	0.15*
		141.7	0.178*	0.238*	0.4	0.436	0.454	0.43	0.336	0.074	0.15*
		141.8	0.178*	0.238*	0.4	0.436	0.454	0.43	0.336	0.074	0.15*
		141.9	0.178*	0.238*	0.4	0.436	0.454	0.43	0.336	0.074	0.15*
		142	0.178*	0.238*	0.4	0.436	0.454	0.53	0.336	0.074	0.15*
		142.1	0.178*	0.238*	0.3	0.436	0.454	0.43	0.336	0.074	0.15*
		142.2	0.078*	0.138*	0.3	0.436	0.454	0.43	0.336	0.074	0.05*
		142.3	0.078*	0.138*	0.3	0.336	0.454	0.43	0.336	0.074	0.05*
		142.4	0.078*	0.138*	0.3	0.336	0.554	0.43	0.336	0.174	0.05*
		142.5	0.078*	0.138*	0.3	0.336	0.554	0.43	0.336	0.174	0.05*
		142.6	0.078*	0.038*	0.3	0.436	0.454	0.33	0.336	0.174	0.05*
		142.7	0.078*	0.038*	0.2	0.336	0.454	0.33	0.336	0.174	0.05*
		142.8	0.078*	0.038*	0.2	0.336	0.454	0.33	0.436	0.274	0.05*
		142.9	0.178*	0.038*	0.2	0.336	0.454	0.33	0.436	0.274	0.05*
		143	0.178*	0.138*	0.2	0.336	0.454	0.43	0.436	0.274	0.05*
		143.1	0.078*	0.138*	0.2	0.336	0.454	0.43	0.336	0.274	0.05*
		143.2	0.078*	0.138*	0.2	0.336	0.454	0.43	0.336	0.274	0.05*
		143.3	0.078*	0.138*	0.2	0.236	0.454	0.43	0.436	0.274	0.15*
		143.4	0.078*	0.138*	0.3	0.336	0.354	0.43	0.436	0.274	0.15*
		143.5	0.078*	0.138*	0.3	0.336	0.354	0.43	0.436	0.274	0.25*
		143.6	0.078*	0.138*	0.3	0.336	0.354	0.43	0.436	0.274	0.25*
		143.7	0.078*	0.138*	0.3	0.336	0.354	0.33	0.436	0.274	0.15*
		143.8	0.078*	0.138*	0.3	0.336	0.354	0.33	0.336	0.174	0.05*
		143.9	0.078*	0.138*	0.3	0.336	0.354	0.33	0.336	0.174	0.05*
		144	0.078*	0.138*	0.4	0.336	0.354	0.33	0.336	0.074	0.05*
		144.1	0.078*	0.138*	0.4	0.336	0.454	0.33	0.336	0.074	0.05*
		144.2	0.078*	0.138*	0.3	0.236	0.454	0.33	0.336	0.074	0.05*
		144.3	0.078*	0.038*	0.3	0.236	0.454	0.33	0.336	0.074	0.05*
		144.4	0.178*	0.138*	0.3	0.136	0.454	0.33	0.336	0.074	0.05*
		144.5	0.178*	0.138*	0.3	0.236	0.454	0.33	0.336	0.174	0.05*
		144.6	0.178*	0.138*	0.3	0.236	0.454	0.33	0.336	0.174	0.05*
		144.7	0.178*	0.138*	0.3	0.236	0.354	0.23	0.336	0.174	0.05*
		144.8	0.178*	0.138*	0.2	0.236	0.354	0.23	0.336	0.174	0.05*
		144.9	0.178*	0.138*	0.2	0.236	0.454	0.33	0.336	0.174	0.15*
		145	0.178*	0.238*	0.2	0.236	0.454	0.43	0.336	0.174	0.15*
		145.1	0.178*	0.238*	0.2	0.236	0.454	0.43	0.336	0.174	0.15*
		145.2	0.078*	0.138*	0.2	0.236	0.454	0.43	0.336	0.174	0.15*
		145.3	0.078*	0.138*	0.2	0.236	0.454	0.43	0.336	0.174	0.15*
		145.4	0.078*	0.138*	0.2	0.236	0.454	0.43	0.336	0.174	0.15*
		145.5	0.078*	0.138*	0.3	0.236	0.454	0.33	0.336	0.174	0.15*
		145.6	0.078*	0.138*	0.3	0.236	0.454	0.33	0.336	0.174	0.15*
		145.7	0.078*	0.138*	0.3	0.236	0.454	0.33	0.336	0.174	0.15*
		145.8	0.078*	0.138*	0.4	0.336	0.454	0.33	0.336	0.174	0.15*
		145.9	0.078*	0.138*	0.4	0.336	0.454	0.33	0.336	0.174	0.05*
		146	0.178*	0.138*	0.4	0.336	0.554	0.33	0.336	0.174	0.05*
		146.1	0.178*	0.138*	0.4	0.336	0.554	0.33	0.336	0.074	0.05*
		146.2	0.178*	0.138*	0.4	0.336	0.554	0.33	0.336	0.074	0.05*
		146.3	0.178*	0.138*	0.3	0.336	0.554	0.33	0.336	0.074	0.15*
		146.4	0.178*	0.238*	0.3	0.336	0.554	0.33	0.336	0.074	0.15*
		146.5	0.278*	0.238*	0.3	0.336	0.554	0.33	0.536	0.174	0.15*
		146.6	0.278*	0.238*	0.3	0.436	0.554	0.43	0.536	0.174	0.15*
		146.7	0.278*	0.238*	0.3	0.436	0.554	0.43	0.536	0.174	0.15*
		146.8	0.278*	0.238*	0.2	0.236	0.454	0.43	0.436	0.074	0.15*
		146.9	0.278*	0.238*	0.2	0.236	0.454	0.43	0.336	0.074	0.15*
		147	0.278*	0.238*	0.2	0.236	0.454	0.43	0.336	0.074	0.15*
		147.1	0.178*	0.138*	0.2	0.236	0.454	0.43	0.336	0.074	0.15*
		147.2	0.178*	0.138*	0.2	0.236	0.454	0.43	0.336	0.074	0.15*
		147.3	0.078*	0.038*	0.2	0.236	0.454	0.33	0.336	0.074	0.15*
		147.4	0.178*	0.138*	0.2	0.236	0.454	0.33	0.336	0.074	0.15*
		147.5	0.178*	0.138*	0.3	0.236	0.454	0.33	0.336	0.074	0.15*
		147.6	0.178*	0.138*	0.3	0.236	0.454	0.33	0.336	0.074	0.15*
		147.7	0.178*	0.138*	0.3	0.236	0.454	0.33	0.336	0.074	0.15*
		147.8	0.178*	0.138*	0.3	0.236	0.454	0.33	0.336	0.174	0.15*
		147.9	0.178*	0.138*	0.3	0.236	0.454	0.33	0.336	0.174	0.15*
		148	0.178*	0.138*	0.3	0.236	0.454	0.33	0.336	0.074	0.15*
		148.1	0.178*	0.138*	0.3	0.236	0.554	0.43	0.336	0.074	0.15*
		148.2	0.178*	0.238*	0.3	0.236	0.554	0.43	0.336	0.074	0.15*
		148.3	0.178*	0.238*	0.2	0.136	0.554	0.43	0.336	0.074	0.25*
		148.4	0.178*	0.238*	0.2	0.136	0.654	0.43	0.436	0.174	0.25*
		148.5	0.278*	0.238*	0.2	0.136	0.654	0.43	0.436	0.174	0.15*
		148.6	0.278*	0.238*	0.3	0.236	0.654	0.43	0.436	0.174	0.15*
		148.7	0.278*	0.238*	0.2	0.236	0.654	0.43	0.436	0.174	0.25*
		148.8	0.278*	0.238*	0.2	0.236	0.554	0.33	0.336	0.074	0.25*
		148.9	0.378*	0.338*	0.2	0.236	0.554	0.33	0.236	0.074	0.25*
		149	0.278*	0.238*	0.2	0.236	0.454	0.33	0.336	0.074	0.25*
		149.1	0.278*	0.238*	0.2	0.236	0.454	0.43	0.336	0.074	0.25*
		149.2	0.278*	0.238*	0.2	0.236	0.454	0.33	0.336	0.074	0.25*
		149.3	0.278*	0.238*	0.2	0.236	0.454	0.43	0.336	0.074	0.25*
		149.4	0.278*	0.238*	0.3	0.336	0.454	0.43	0.336	0.074	0.25*
		149.5	0.278*	0.238*	0.3	0.336	0.454	0.43	0.336	0.074	0.25*
		149.6	0.278*	0.238*	0.3	0.236	0.454	0.43	0.436	0.174	0.25*
		149.7	0.278*	0.238*	0.3	0.236	0.554	0.43	0.436	0.174	0.15*
		149.8	0.278*	0.238*	0.3	0.236	0.654	0.53	0.436	0.274	0.15*
[truncated: 5,501 more rows]

## Sheet: Figure_S5_D
		Time	3.9063	7.8125	15.6250	31.3	62.5	125	250	500	3.91
		-50	0.24*	0.048*	-0.076*	0.198	0.064	0.094	0.194	0.186	-0.316*
		-49.9	0.14*	-0.052*	-0.076*	0.198	0.064	0.194	0.194	0.186	-0.416*
		-49.8	0.14*	-0.052*	-0.176*	0.098	0.064	0.194	0.194	0.186	-0.416*
		-49.7	0.14*	-0.052*	-0.176*	0.198	0.064	0.194	0.294	0.186	-0.316*
		-49.6	0.04*	0.048*	-0.176*	0.198	0.064	0.094	0.194	0.086	-0.216*
		-49.5	0.14*	0.048*	-0.076*	0.098	0.064	0.094	0.194	0.186	-0.216*
		-49.4	0.14*	0.048*	0.024*	0.198	0.064	0.194	0.194	0.186	-0.216*
		-49.3	0.14*	0.048*	-0.176*	0.098	0.064	0.194	0.294	0.286	-0.316*
		-49.2	0.14*	-0.052*	-0.076*	0.098	0.064	0.094	0.194	0.286	-0.316*
		-49.1	0.14*	0.048*	-0.076*	0.198	-0.036	0.094	0.194	0.086	-0.316*
		-49	0.14*	0.048*	-0.176*	0.098	-0.036	-0.006	0.194	0.186	-0.116*
		-48.9	0.14*	0.048*	-0.176*	0.098	-0.036	-0.006	0.194	0.186	-0.316*
		-48.8	0.04*	-0.052*	-0.176*	0.098	0.164	0.094	0.194	0.186	-0.316*
		-48.7	0.14*	0.048*	0.024*	0.198	0.164	0.194	0.194	0.186	-0.316*
		-48.6	0.14*	0.148*	-0.076*	0.198	0.164	0.194	0.194	0.086	-0.216*
		-48.5	0.24*	0.148*	-0.076*	0.198	0.064	0.094	0.194	0.086	-0.216*
		-48.4	0.24*	0.148*	-0.076*	0.198	0.164	0.094	0.194	0.186	-0.316*
		-48.3	0.14*	0.048*	-0.176*	0.198	0.164	0.194	0.094	0.186	-0.316*
		-48.2	0.14*	0.048*	-0.076*	0.098	0.064	0.194	-0.006	-0.014	-0.316*
		-48.1	0.14*	0.048*	-0.076*	0.098	0.064	0.194	-0.006	-0.014	-0.116*
		-48	0.04*	-0.052*	-0.076*	0.098	-0.036	0.094	0.094	-0.014	-0.116*
		-47.9	0.14*	0.048*	-0.076*	-0.002	0.064	0.094	0.194	0.186	-0.216*
		-47.8	0.14*	0.148*	-0.076*	0.098	0.064	0.094	0.194	0.186	-0.316*
		-47.7	0.24*	0.048*	-0.076*	0.198	0.164	0.194	0.094	0.086	-0.216*
		-47.6	0.24*	0.048*	-0.076*	0.198	-0.036	0.094	0.094	0.086	-0.216*
		-47.5	0.14*	-0.052*	-0.076*	0.198	-0.036	0.094	0.194	0.086	-0.316*
		-47.4	0.24*	0.148*	-0.076*	0.098	-0.036	0.094	0.194	0.086	-0.216*
		-47.3	0.24*	0.148*	-0.076*	0.198	0.064	0.194	0.094	0.186	-0.216*
		-47.2	0.24*	0.148*	-0.076*	0.198	0.064	0.194	0.094	0.186	-0.116*
		-47.1	0.14*	0.048*	-0.076*	0.098	0.064	0.194	0.094	0.086	-0.216*
		-47	0.14*	0.048*	0.124*	0.198	-0.036	-0.006	0.194	0.086	-0.216*
		-46.9	0.14*	0.048*	0.024*	0.098	0.064	-0.006	0.194	0.086	-0.316*
		-46.8	0.34*	0.148*	0.024*	0.198	0.164	0.194	0.194	0.086	-0.216*
		-46.7	0.34*	0.148*	0.024*	0.198	0.064	0.094	0.194	0.186	-0.216*
		-46.6	0.24*	0.148*	0.024*	0.198	-0.036	0.094	0.094	0.086	-0.216*
		-46.5	0.24*	0.148*	-0.076*	0.098	-0.036	0.094	0.294	0.186	-0.316*
		-46.4	0.34*	0.148*	-0.076*	0.098	0.064	0.194	0.294	0.186	-0.116*
		-46.3	0.24*	0.148*	-0.076*	0.098	0.064	0.194	0.294	0.286	-0.116*
		-46.2	0.34*	0.248*	-0.076*	0.198	0.064	0.094	0.294	0.286	-0.216*
		-46.1	0.24*	0.148*	0.024*	0.098	-0.036	-0.006	0.294	0.186	-0.216*
		-46	0.34*	0.148*	0.124*	0.198	-0.036	0.094	0.294	0.186	-0.116*
		-45.9	0.34*	0.148*	0.124*	0.198	-0.036	0.094	0.194	0.086	-0.216*
		-45.8	0.34*	0.148*	0.124*	0.198	0.064	0.194	0.294	0.186	-0.116*
		-45.7	0.44*	0.248*	-0.076*	0.098	-0.036	0.194	0.294	0.186	-0.116*
		-45.6	0.44*	0.248*	-0.076*	0.098	0.064	0.194	0.194	0.186	-0.216*
		-45.5	0.24*	0.148*	0.024*	0.098	0.064	0.194	0.194	0.186	-0.216*
		-45.4	0.24*	0.248*	0.024*	0.198	-0.036	-0.006	0.194	0.186	-0.116*
		-45.3	0.24*	0.148*	0.024*	0.098	0.064	0.094	0.194	0.286	-0.116*
		-45.2	0.24*	0.148*	0.024*	0.098	0.064	0.094	0.294	0.286	-0.216*
		-45.1	0.34*	0.148*	0.024*	0.098	0.164	0.094	0.294	0.186	-0.116*
		-45	0.34*	0.248*	0.024*	0.098	0.164	0.094	0.294	0.186	-0.216*
		-44.9	0.34*	0.248*	0.024*	0.198	0.064	0.094	0.294	0.186	-0.216*
		-44.8	0.24*	0.148*	0.024*	0.198	0.064	0.194	0.294	0.186	-0.316*
		-44.7	0.34*	0.248*	0.024*	0.098	0.164	-0.006	0.094	0.186	-0.316*
		-44.6	0.24*	0.148*	0.224*	0.298	0.064	-0.106	0.094	0.186	-0.316*
		-44.5	0.24*	0.048*	0.124*	0.198	0.064	-0.006	0.094	0.186	-0.316*
		-44.4	0.24*	0.048*	0.124*	0.198	0.164	-0.006	0.194	0.386	-0.216*
		-44.3	0.24*	0.248*	0.124*	0.198	0.164	0.094	0.094	0.186	-0.316*
		-44.2	0.24*	0.148*	0.224*	0.298	0.164	0.194	0.194	0.286	-0.416*
		-44.1	0.24*	0.148*	0.124*	0.298	0.064	0.294	0.194	0.186	-0.316*
		-44	0.34*	0.148*	0.024*	0.298	0.064	0.294	0.294	0.286	-0.216*
		-43.9	0.24*	0.048*	0.024*	0.298	0.064	0.294	0.294	0.286	-0.216*
		-43.8	0.34*	0.148*	0.124*	0.198	0.064	0.294	0.394	0.386	-0.116*
		-43.7	0.14*	-0.052*	0.124*	0.098	0.064	0.294	0.294	0.186	-0.016*
		-43.6	0.24*	-0.052*	0.124*	0.098	0.064	0.294	0.194	0.186	-0.016*
		-43.5	0.24*	0.048*	0.224*	0.198	0.164	0.294	0.194	0.186	-0.216*
		-43.4	0.24*	-0.052*	0.124*	0.098	0.164	0.294	0.294	0.186	-0.216*
		-43.3	0.24*	0.048*	0.024*	0.098	0.164	0.194	0.294	0.086	-0.116*
		-43.2	0.34*	0.148*	0.124*	0.198	0.164	0.194	0.294	0.186	-0.216*
		-43.1	0.34*	0.248*	0.224*	0.298	0.164	0.194	0.294	0.186	-0.216*
		-43	0.24*	0.148*	0.124*	0.298	0.064	0.094	0.294	0.186	-0.216*
		-42.9	0.14*	0.148*	0.124*	0.198	0.164	0.294	0.294	0.186	-0.116*
		-42.8	0.24*	0.148*	0.124*	0.198	0.264	0.194	0.394	0.386	-0.216*
		-42.7	0.24*	0.148*	0.024*	0.198	0.164	0.194	0.294	0.286	-0.316*
		-42.6	0.24*	0.148*	0.024*	0.198	0.164	0.194	0.294	0.286	-0.216*
		-42.5	0.24*	0.148*	0.124*	0.198	0.064	0.094	0.294	0.186	-0.216*
		-42.4	0.14*	0.148*	0.124*	0.198	0.064	0.194	0.294	0.186	-0.216*
		-42.3	0.24*	0.348*	0.124*	0.198	0.064	0.194	0.394	0.186	-0.116*
		-42.2	0.24*	0.248*	0.124*	0.198	0.164	0.194	0.394	0.286	-0.216*
		-42.1	0.24*	0.148*	0.124*	0.198	0.164	0.194	0.394	0.386	-0.116*
		-42	0.24*	0.148*	-0.076*	0.098	0.164	0.094	0.394	0.386	-0.116*
		-41.9	0.24*	0.248*	0.024*	0.198	0.064	-0.006	0.294	0.286	-0.116*
		-41.8	0.14*	0.248*	0.024*	0.198	-0.036	0.094	0.294	0.286	-0.216*
		-41.7	0.14*	0.248*	0.124*	0.298	0.064	0.194	0.394	0.286	-0.216*
		-41.6	0.04*	0.148*	0.124*	0.298	0.064	0.194	0.394	0.286	-0.116*
		-41.5	0.14*	0.148*	0.124*	0.198	0.064	0.094	0.394	0.286	-0.116*
		-41.4	0.14*	0.148*	0.124*	0.198	0.064	0.094	0.394	0.186	-0.016*
		-41.3	0.14*	0.248*	0.124*	0.198	0.064	0.094	0.294	0.086	-0.016*
		-41.2	0.04*	0.148*	0.124*	0.198	0.064	0.194	0.294	0.086	-0.116*
		-41.1	0.04*	0.148*	0.024*	0.098	0.064	0.194	0.294	0.186	-0.116*
		-41	0.04*	0.148*	0.024*	0.098	0.064	0.094	0.294	0.186	-0.016*
		-40.9	0.04*	0.148*	-0.076*	0.098	-0.036	-0.006	0.294	0.186	-0.016*
		-40.8	0.04*	0.148*	-0.076*	0.098	-0.036	-0.006	0.294	0.186	-0.016*
		-40.7	0.04*	0.148*	0.024*	0.098	0.064	-0.006	0.394	0.186	-0.016*
		-40.6	0.14*	0.148*	0.124*	0.198	0.064	0.094	0.394	0.186	-0.216*
		-40.5	0.14*	0.148*	0.124*	0.198	-0.036	0.094	0.294	0.186	-0.216*
		-40.4	0.04*	0.148*	0.024*	0.098	-0.036	0.094	0.294	0.186	-0.116*
		-40.3	0.04*	0.148*	0.024*	0.098	-0.036	0.094	0.294	0.286	-0.016*
		-40.2	0.04*	0.148*	0.024*	0.098	-0.036	0.094	0.294	0.286	-0.116*
		-40.1	0.04*	0.148*	0.024*	0.098	-0.036	0.194	0.294	0.286	-0.116*
		-40	0.04*	0.148*	0.024*	0.198	0.064	0.094	0.194	0.186	-0.116*
		-39.9	0.04*	0.148*	0.024*	0.198	0.064	0.094	0.194	0.186	-0.116*
		-39.8	0.04*	0.148*	0.024*	0.198	-0.036	-0.006	0.194	0.186	-0.116*
		-39.7	0.04*	0.248*	0.024*	0.098	-0.036	-0.006	0.294	0.186	-0.116*
		-39.6	0.04*	0.248*	0.024*	0.098	-0.036	-0.006	0.294	0.186	-0.216*
		-39.5	-0.06*	0.148*	0.124*	0.098	-0.036	0.094	0.294	0.186	-0.216*
		-39.4	-0.06*	0.048*	0.124*	0.098	-0.036	0.094	0.294	0.186	-0.216*
		-39.3	-0.06*	0.048*	0.124*	0.098	-0.036	0.094	0.294	0.186	-0.216*
		-39.2	-0.06*	0.048*	-0.076*	-0.002	-0.036	0.094	0.194	0.086	-0.216*
		-39.1	0.14*	0.148*	-0.076*	-0.002	0.064	0.094	0.394	0.186	-0.116*
		-39	0.14*	0.148*	0.024*	0.098	-0.036	0.094	0.294	0.186	-0.116*
		-38.9	0.14*	0.148*	0.024*	0.198	-0.036	0.094	0.294	0.186	-0.216*
		-38.8	0.14*	0.148*	0.024*	0.198	-0.036	0.194	0.294	0.186	-0.116*
		-38.7	0.14*	0.148*	0.124*	0.198	-0.036	0.094	0.294	0.186	-0.116*
		-38.6	0.14*	0.248*	0.124*	0.198	-0.036	0.094	0.294	0.186	-0.116*
		-38.5	0.04*	0.148*	0.124*	0.198	-0.136	-0.006	0.294	0.186	-0.116*
		-38.4	-0.06*	0.148*	0.124*	0.198	-0.036	-0.006	0.294	0.186	-0.116*
		-38.3	0.04*	0.148*	0.024*	0.098	-0.036	-0.006	0.194	0.086	-0.116*
		-38.2	0.04*	0.048*	0.024*	0.098	-0.036	-0.006	0.194	0.186	-0.116*
		-38.1	0.04*	0.048*	0.024*	0.098	-0.036	-0.006	0.194	0.186	-0.116*
		-38	0.14*	0.148*	0.024*	-0.002	0.064	0.194	0.194	0.186	-0.216*
		-37.9	0.14*	0.148*	0.024*	-0.002	0.064	0.194	0.194	0.086	-0.216*
		-37.8	0.04*	0.148*	-0.076*	-0.002	0.064	0.194	0.194	0.086	-0.216*
		-37.7	0.04*	0.148*	0.024*	-0.002	0.064	0.194	0.094	0.086	-0.216*
		-37.6	0.04*	0.148*	0.024*	-0.002	0.064	0.094	0.194	0.086	-0.216*
		-37.5	0.04*	0.148*	0.024*	-0.002	0.064	0.094	0.194	0.086	-0.116*
		-37.4	0.14*	0.148*	0.024*	-0.002	0.064	0.094	0.094	-0.014	-0.116*
		-37.3	0.14*	0.148*	0.024*	-0.002	0.064	0.094	0.094	-0.014	-0.116*
		-37.2	0.14*	0.148*	-0.076*	-0.102	0.064	0.094	0.094	-0.014	-0.116*
		-37.1	0.04*	0.048*	-0.076*	-0.002	-0.036	-0.006	0.094	-0.014	-0.116*
		-37	0.04*	0.048*	-0.076*	-0.002	0.064	-0.006	0.094	-0.014	-0.116*
		-36.9	0.04*	0.048*	-0.076*	-0.002	-0.036	0.094	0.094	0.086	-0.116*
		-36.8	0.04*	0.048*	-0.076*	-0.102	-0.036	0.094	0.094	0.086	-0.116*
		-36.7	0.04*	0.048*	-0.076*	-0.102	-0.036	0.094	0.194	0.086	-0.116*
		-36.6	0.04*	0.048*	0.024*	-0.002	-0.036	0.094	0.194	0.086	-0.116*
		-36.5	0.04*	0.048*	0.024*	-0.002	-0.036	0.094	0.094	0.086	-0.316*
		-36.4	0.04*	0.048*	0.024*	-0.002	-0.036	0.094	0.094	0.086	-0.316*
		-36.3	0.04*	0.148*	0.024*	-0.002	-0.036	-0.006	0.194	0.086	-0.216*
		-36.2	-0.16*	0.048*	0.024*	-0.002	-0.036	-0.006	0.194	0.086	-0.216*
		-36.1	0.04*	0.148*	0.024*	-0.002	-0.036	-0.006	0.194	0.086	-0.216*
		-36	0.04*	0.148*	-0.076*	-0.102	-0.036	-0.006	0.194	0.086	-0.216*
		-35.9	0.04*	0.148*	0.024*	-0.102	0.064	-0.006	0.194	0.086	-0.216*
		-35.8	0.04*	0.148*	0.024*	-0.102	0.064	-0.006	0.194	0.086	-0.116*
		-35.7	0.04*	0.148*	-0.076*	-0.102	0.164	0.094	0.194	0.186	-0.216*
		-35.6	0.04*	0.048*	-0.076*	-0.102	0.164	0.194	0.194	0.186	-0.216*
		-35.5	0.04*	0.048*	-0.076*	-0.102	0.164	0.194	0.094	0.086	-0.116*
		-35.4	0.04*	0.048*	-0.076*	-0.102	0.064	0.094	0.194	0.086	-0.116*
		-35.3	0.04*	0.048*	-0.076*	-0.102	0.064	0.094	0.194	-0.014	-0.216*
		-35.2	0.04*	0.048*	-0.076*	-0.102	0.064	0.094	0.194	-0.014	-0.216*
		-35.1	0.04*	0.048*	-0.076*	-0.102	0.064	0.094	0.194	-0.014	-0.216*
		-35	0.04*	0.148*	-0.076*	-0.102	0.064	0.094	0.194	-0.014	-0.216*
		-34.9	0.04*	0.148*	0.024*	-0.102	0.064	0.094	0.194	-0.014	-0.216*
		-34.8	0.14*	0.148*	0.124*	-0.002	0.064	0.094	0.094	-0.014	-0.216*
		-34.7	0.14*	0.148*	0.024*	-0.102	0.064	-0.006	0.094	-0.014	-0.216*
		-34.6	0.04*	0.148*	0.124*	0.098	-0.036	-0.006	0.194	0.086	-0.216*
		-34.5	0.04*	0.148*	0.024*	-0.002	0.064	0.094	0.194	0.186	-0.316*
		-34.4	0.04*	0.148*	0.024*	-0.002	0.164	0.194	0.194	0.086	-0.216*
		-34.3	0.04*	0.148*	0.024*	-0.002	0.164	0.194	0.294	0.086	-0.216*
		-34.2	0.04*	0.148*	0.024*	-0.002	0.164	0.194	0.194	-0.014	-0.116*
		-34.1	0.04*	0.148*	0.024*	-0.002	0.164	0.194	0.194	-0.014	-0.116*
		-34	0.04*	0.148*	0.024*	-0.002	0.064	0.094	0.194	-0.014	-0.116*
[truncated: 7,339 more rows]

## Sheet: Figure_S5_E
		Time	3.9063	7.8125	15.6250	31.3	62.5	125	250	500	3.91
[truncated: 7,500 more rows]

[truncated: 3 more sheets: Figure_S5_F, Figure_S5_G, Figure_S5_H]
