# Supplementary material for: Effects of common mutations in the SARS-CoV-2 Spike RBD and its ligand, the human ACE2 receptor on binding affinity and kinetics
Source: eLife. 2021 Aug 26;10:e70658. doi: 10.7554/eLife.70658 (PMC8480977; doi:10.7554/eLife.70658)
Supplement: Figure 3—source data 1. [file elife-70658-fig3-data1.xlsx]

## Sheet: Figure_3_A
		Time	3.9063	7.8125	15.6	31.3	62.5	125	250	500 nM	3.91
		-50	0.02*	0.05*	0.538	0.206	0.158	0.262	0.234	0.164	0.054*
		-49.9	0.12*	0.05*	0.538	0.206	0.058	0.262	0.134	0.264	0.054*
		-49.8	0.02*	-0.15*	0.438	0.206	0.158	0.362	0.134	0.264	0.054*
		-49.7	0.02*	-0.05*	0.338	0.206	0.158	0.362	0.034	0.064	0.154*
		-49.6	0.02*	-0.05*	0.338	0.106	0.058	0.362	0.134	0.064	-0.046*
		-49.5	0.02*	-0.05*	0.338	0.106	0.158	0.262	0.134	0.064	0.054*
		-49.4	0.02*	-0.05*	0.338	0.106	0.158	0.262	0.134	0.064	0.054*
		-49.3	0.02*	-0.15*	0.238	0.006	0.058	0.162	0.134	0.064	0.054*
		-49.2	0.02*	-0.15*	0.238	0.106	0.058	0.162	0.134	0.164	0.054*
		-49.1	0.02*	-0.05*	0.238	0.106	0.158	0.162	0.134	0.164	0.154*
		-49	-0.08*	-0.05*	0.338	0.106	0.158	0.262	0.234	0.164	0.054*
		-48.9	-0.08*	-0.15*	0.338	0.106	0.158	0.262	0.234	0.064	0.054*
		-48.8	0.12*	-0.05*	0.338	0.106	0.158	0.262	0.234	0.064	0.054*
		-48.7	0.12*	-0.05*	0.338	0.106	0.158	0.262	0.234	0.164	0.054*
		-48.6	0.02*	-0.15*	0.238	0.006	0.258	0.162	0.234	0.164	0.054*
		-48.5	0.02*	-0.05*	0.238	0.106	0.158	0.162	0.234	0.164	0.054*
		-48.4	0.02*	-0.05*	0.238	0.106	0.158	0.262	0.234	0.164	0.054*
		-48.3	0.12*	-0.05*	0.238	0.106	0.058	0.162	0.134	0.064	0.054*
		-48.2	0.12*	-0.05*	0.238	0.106	0.158	0.162	0.134	0.164	0.054*
		-48.1	-0.08*	-0.15*	0.238	0.206	0.158	0.162	0.234	0.264	0.154*
		-48	-0.08*	-0.05*	0.138	0.106	0.258	0.362	0.234	0.264	0.054*
		-47.9	-0.08*	-0.05*	0.138	0.106	0.258	0.362	0.134	0.164	0.054*
		-47.8	0.02*	-0.05*	0.238	0.006	0.258	0.362	0.234	0.164	0.054*
		-47.7	0.12*	0.05*	0.238	0.006	0.158	0.262	0.134	0.164	-0.046*
		-47.6	0.12*	0.05*	0.138	0.106	0.258	0.162	0.034	0.064	-0.046*
		-47.5	0.02*	-0.05*	0.138	0.106	0.158	0.262	0.034	0.064	-0.046*
		-47.4	0.12*	-0.15*	0.238	0.106	0.158	0.262	0.034	0.164	-0.046*
		-47.3	0.12*	-0.05*	0.238	0.106	0.158	0.262	0.034	0.164	0.054*
		-47.2	0.12*	-0.05*	0.238	0.206	0.158	0.262	0.134	0.164	0.054*
		-47.1	0.12*	-0.05*	0.138	0.106	0.158	0.362	0.134	0.164	0.154*
		-47	0.22*	-0.05*	0.238	0.106	0.258	0.362	0.134	0.164	0.054*
		-46.9	0.12*	-0.15*	0.238	0.106	0.258	0.362	0.134	0.164	0.054*
		-46.8	0.02*	-0.05*	0.238	0.006	0.158	0.162	0.134	0.064	0.054*
		-46.7	0.02*	-0.05*	0.138	-0.094	0.158	0.162	0.134	0.064	0.054*
		-46.6	0.22*	0.05*	0.338	0.106	0.258	0.262	0.034	0.064	0.154*
		-46.5	0.22*	0.05*	0.338	0.106	0.258	0.262	0.034	0.064	0.054*
		-46.4	0.22*	0.05*	0.338	0.106	0.258	0.362	0.034	0.064	-0.046*
		-46.3	0.12*	-0.05*	0.138	0.006	0.258	0.362	0.134	0.164	-0.046*
		-46.2	0.22*	-0.05*	0.238	0.006	0.158	0.262	0.134	0.064	-0.046*
		-46.1	0.22*	-0.05*	0.238	0.006	0.258	0.162	0.134	0.064	0.154*
		-46	0.22*	-0.05*	0.238	0.006	0.258	0.162	0.134	0.064	0.154*
		-45.9	0.22*	-0.05*	0.138	-0.094	0.158	0.162	0.034	0.064	0.154*
		-45.8	0.32*	0.05*	0.238	-0.094	0.258	0.262	0.034	0.064	0.054*
		-45.7	0.32*	0.05*	0.238	-0.094	0.258	0.262	0.034	0.064	-0.046*
		-45.6	0.32*	0.05*	0.338	0.006	0.358	0.262	0.234	0.164	-0.046*
		-45.5	0.32*	0.15*	0.338	0.006	0.258	0.262	0.234	0.164	-0.046*
		-45.4	0.22*	0.05*	0.238	-0.094	0.258	0.362	0.134	0.164	-0.046*
		-45.3	0.22*	-0.05*	0.238	-0.094	0.258	0.262	0.134	0.164	0.054*
		-45.2	0.42*	0.05*	0.138	-0.194	0.258	0.262	0.134	0.164	0.154*
		-45.1	0.32*	0.05*	0.138	-0.194	0.258	0.162	0.134	0.164	0.154*
		-45	0.32*	0.05*	0.338	-0.094	0.258	0.262	0.234	0.264	0.154*
		-44.9	0.22*	0.05*	0.338	-0.094	0.358	0.162	0.234	0.064	0.154*
		-44.8	0.32*	0.05*	0.338	-0.094	0.358	0.262	0.134	0.064	0.154*
		-44.7	0.32*	0.05*	0.338	-0.094	0.358	0.262	0.134	-0.036	0.054*
		-44.6	0.22*	0.05*	0.438	0.006	0.458	0.262	0.134	-0.236	0.154*
		-44.5	0.32*	0.05*	0.338	-0.094	0.358	0.162	0.134	-0.236	0.154*
		-44.4	0.32*	0.05*	0.438	-0.194	0.258	0.262	0.134	-0.236	0.054*
		-44.3	0.22*	-0.05*	0.338	-0.094	0.258	0.062	0.334	-0.036	0.254*
		-44.2	0.32*	0.05*	0.238	-0.194	0.258	0.162	0.234	0.164	0.254*
		-44.1	0.32*	0.15*	0.138	-0.194	0.258	0.062	0.134	0.264	0.154*
		-44	0.22*	-0.05*	0.138	-0.194	0.258	0.062	0.134	0.264	0.154*
		-43.9	0.22*	0.05*	0.038	-0.294	0.158	0.062	0.134	0.364	0.154*
		-43.8	0.32*	0.05*	-0.062	-0.194	0.058	-0.038	0.134	0.364	0.154*
		-43.7	0.22*	-0.05*	-0.062	-0.294	-0.042	-0.138	0.034	0.164	0.054*
		-43.6	0.12*	-0.05*	-0.062	-0.294	0.058	-0.038	0.034	0.164	0.154*
		-43.5	0.22*	0.05*	0.138	-0.094	-0.042	-0.038	0.034	0.164	0.054*
		-43.4	0.02*	-0.05*	0.138	-0.094	-0.042	-0.038	0.134	0.264	0.254*
		-43.3	0.12*	0.05*	0.138	-0.094	0.058	0.062	0.234	0.264	0.254*
		-43.2	0.22*	0.05*	0.138	-0.094	0.158	-0.038	0.134	0.164	0.254*
		-43.1	0.12*	-0.05*	0.038	-0.294	0.058	-0.038	0.134	0.164	0.254*
		-43	0.12*	0.05*	0.138	-0.294	0.058	-0.038	0.134	0.164	0.154*
		-42.9	0.12*	0.05*	0.138	-0.094	0.058	-0.038	0.034	0.064	0.254*
		-42.8	0.22*	0.05*	0.138	-0.094	0.058	0.062	0.234	0.264	0.254*
		-42.7	0.22*	0.05*	0.138	-0.094	0.058	-0.038	0.134	0.264	0.354*
		-42.6	0.02*	0.05*	0.138	-0.194	0.158	-0.038	0.134	0.164	0.354*
		-42.5	0.02*	0.05*	0.138	-0.094	-0.042	-0.138	0.134	0.164	0.254*
		-42.4	0.12*	0.05*	0.038	-0.194	0.058	-0.038	0.034	0.064	0.154*
		-42.3	0.12*	0.05*	0.138	-0.094	0.058	-0.038	0.034	0.064	0.254*
		-42.2	0.02*	-0.05*	0.138	-0.094	0.058	0.062	0.134	0.064	0.354*
		-42.1	0.22*	0.05*	0.138	-0.094	0.058	-0.038	0.134	0.064	0.354*
		-42	0.22*	0.05*	0.038	-0.194	0.058	-0.138	0.134	0.164	0.254*
		-41.9	0.22*	0.05*	0.138	-0.194	0.058	-0.138	0.134	0.264	0.354*
		-41.8	0.12*	-0.05*	0.138	-0.094	0.058	-0.038	0.234	0.264	0.354*
		-41.7	0.22*	-0.05*	0.138	-0.094	0.158	0.062	0.234	0.164	0.354*
		-41.6	0.12*	0.05*	0.138	-0.094	0.258	0.062	0.134	0.064	0.254*
		-41.5	0.12*	0.05*	0.038	-0.094	0.158	0.062	0.134	0.064	0.254*
		-41.4	0.12*	0.05*	0.038	-0.194	0.058	-0.038	0.134	0.064	0.354*
		-41.3	0.12*	-0.05*	0.038	-0.194	0.058	-0.038	0.134	0.164	0.354*
		-41.2	0.22*	-0.05*	0.138	-0.194	0.058	-0.038	0.334	0.264	0.354*
		-41.1	0.22*	-0.05*	0.038	-0.194	0.058	0.062	0.234	0.164	0.454*
		-41	0.22*	-0.05*	0.038	-0.194	0.058	0.062	0.234	0.164	0.454*
		-40.9	0.12*	-0.05*	-0.062	-0.194	0.058	-0.038	0.134	0.164	0.354*
		-40.8	0.22*	-0.05*	0.038	-0.094	0.158	0.062	0.134	0.164	0.354*
		-40.7	0.32*	0.05*	0.038	-0.194	0.158	0.062	0.134	-0.036	0.254*
		-40.6	0.22*	0.05*	-0.062	-0.294	0.158	0.062	0.134	0.064	0.254*
		-40.5	0.12*	-0.05*	0.038	-0.294	-0.042	0.062	0.234	0.164	0.254*
		-40.4	0.12*	-0.15*	0.038	-0.194	-0.042	0.062	0.234	0.164	0.254*
		-40.3	0.12*	-0.15*	0.038	-0.194	0.058	0.062	0.134	0.064	0.254*
		-40.2	0.12*	-0.05*	0.038	-0.194	0.058	0.062	0.134	0.064	0.254*
		-40.1	0.12*	-0.05*	0.038	-0.194	-0.042	-0.038	0.234	0.064	0.454*
		-40	0.12*	-0.15*	0.038	-0.294	-0.042	-0.138	0.234	0.064	0.354*
		-39.9	0.12*	-0.15*	0.038	-0.094	-0.042	-0.038	0.134	-0.036	0.254*
		-39.8	0.12*	-0.15*	0.038	-0.094	0.058	0.062	0.134	-0.036	0.254*
		-39.7	0.12*	-0.15*	0.038	-0.094	0.058	0.062	0.034	-0.036	0.254*
		-39.6	0.22*	-0.05*	0.038	-0.094	0.058	0.062	0.034	-0.036	0.254*
		-39.5	0.22*	0.05*	0.038	-0.094	-0.042	-0.038	0.134	-0.036	0.154*
		-39.4	0.02*	-0.05*	0.138	-0.194	-0.042	-0.038	0.234	0.064	0.154*
		-39.3	0.02*	-0.15*	0.238	-0.094	-0.042	-0.038	0.134	-0.036	0.154*
		-39.2	0.12*	-0.15*	0.138	-0.094	0.058	0.162	0.134	-0.036	0.154*
		-39.1	0.12*	-0.15*	0.138	-0.094	0.058	0.162	0.134	-0.036	0.254*
		-39	0.12*	-0.15*	0.038	-0.094	0.058	0.162	0.234	-0.036	0.254*
		-38.9	0.22*	0.05*	0.138	-0.094	0.158	0.162	0.134	-0.036	0.254*
		-38.8	0.22*	0.05*	0.138	-0.094	0.158	0.162	0.134	-0.036	0.254*
		-38.7	0.12*	-0.15*	0.138	-0.194	0.158	0.162	0.034	-0.136	0.154*
		-38.6	0.12*	-0.15*	0.138	-0.194	0.058	0.062	0.034	-0.036	0.154*
		-38.5	0.12*	-0.15*	0.138	-0.094	0.058	0.062	0.134	0.064	0.254*
		-38.4	0.12*	-0.15*	0.238	0.006	0.058	0.162	0.134	-0.036	0.154*
		-38.3	0.02*	-0.05*	0.138	-0.094	-0.042	0.162	0.134	-0.036	0.154*
		-38.2	0.12*	-0.05*	0.238	-0.094	0.058	0.062	0.234	-0.036	0.154*
		-38.1	0.02*	-0.15*	0.238	0.006	0.158	0.162	0.134	0.064	0.054*
		-38	0.02*	-0.15*	0.238	-0.094	0.158	0.162	0.134	0.064	0.154*
		-37.9	0.02*	-0.25*	0.238	-0.094	0.158	0.162	0.134	0.064	0.254*
		-37.8	0.02*	-0.15*	0.238	-0.094	0.058	0.162	0.134	0.064	0.254*
		-37.7	0.12*	-0.05*	0.238	-0.094	0.058	0.162	0.134	0.064	0.254*
		-37.6	0.12*	-0.05*	0.238	-0.094	0.058	0.162	0.034	-0.036	0.154*
		-37.5	0.12*	-0.05*	0.338	0.006	0.158	0.062	0.034	0.064	0.154*
		-37.4	0.12*	-0.05*	0.138	0.006	0.158	0.062	0.134	0.064	0.054*
		-37.3	0.02*	-0.05*	0.138	-0.094	0.158	0.062	0.134	0.064	0.154*
		-37.2	0.02*	-0.15*	0.238	-0.094	0.058	0.062	0.134	-0.036	0.154*
		-37.1	0.12*	-0.15*	0.238	-0.094	0.058	0.162	0.134	-0.036	0.154*
		-37	0.12*	-0.15*	0.238	-0.094	0.058	0.162	0.134	-0.036	0.154*
		-36.9	0.12*	-0.15*	0.238	-0.094	-0.042	0.062	0.234	0.064	0.254*
		-36.8	0.02*	-0.15*	0.238	0.006	0.058	0.062	0.234	0.064	0.154*
		-36.7	0.02*	-0.15*	0.338	0.106	0.058	0.062	0.234	0.064	0.154*
		-36.6	0.02*	-0.15*	0.338	0.106	0.158	0.162	0.234	0.064	0.154*
		-36.5	0.02*	-0.15*	0.338	0.106	0.058	0.162	0.234	0.064	0.254*
		-36.4	0.02*	-0.15*	0.438	0.106	0.158	0.262	0.134	0.064	0.154*
		-36.3	0.02*	-0.15*	0.438	0.106	0.158	0.262	0.134	0.064	0.154*
		-36.2	0.02*	-0.25*	0.338	0.106	0.058	0.262	0.134	0.064	0.154*
		-36.1	0.02*	-0.35*	0.338	0.006	0.058	0.162	0.034	0.064	0.154*
		-36	0.02*	-0.25*	0.338	0.006	0.058	0.162	0.134	0.064	0.154*
		-35.9	0.02*	-0.25*	0.238	0.006	0.058	0.062	0.134	0.064	0.154*
		-35.8	0.02*	-0.25*	0.238	0.006	0.058	0.062	0.134	0.064	0.154*
		-35.7	0.02*	-0.25*	0.238	0.006	0.058	0.162	0.234	0.064	0.154*
		-35.6	-0.08*	-0.25*	0.238	0.006	0.058	0.162	0.234	0.064	0.154*
		-35.5	-0.08*	-0.25*	0.238	0.006	0.058	0.062	0.234	0.164	0.154*
		-35.4	0.02*	-0.15*	0.238	0.106	0.058	0.062	0.234	0.164	0.254*
		-35.3	-0.08*	-0.25*	0.138	0.006	0.058	0.062	0.134	0.064	0.254*
		-35.2	-0.08*	-0.25*	0.238	0.006	0.058	0.062	0.134	0.064	0.254*
		-35.1	-0.08*	-0.35*	0.238	0.006	0.158	0.062	0.134	0.064	0.254*
		-35	-0.08*	-0.35*	0.238	0.006	0.158	0.162	0.134	0.064	0.254*
		-34.9	0.02*	-0.35*	0.238	-0.094	0.058	0.162	0.234	0.064	0.254*
		-34.8	0.02*	-0.25*	0.338	0.106	-0.042	0.062	0.234	0.064	0.254*
		-34.7	0.02*	-0.25*	0.238	0.106	-0.042	0.062	0.234	0.064	0.254*
		-34.6	0.02*	-0.25*	0.238	0.106	-0.042	0.062	0.334	0.164	0.254*
		-34.5	0.02*	-0.25*	0.238	0.106	-0.042	-0.038	0.334	0.164	0.254*
		-34.4	-0.08*	-0.25*	0.338	0.106	-0.042	-0.038	0.334	0.164	0.254*
		-34.3	-0.18*	-0.35*	0.338	0.106	0.058	0.062	0.334	0.164	0.254*
		-34.2	-0.18*	-0.35*	0.338	0.106	0.058	0.162	0.334	0.264	0.254*
		-34.1	-0.18*	-0.35*	0.238	0.006	0.058	0.162	0.334	0.164	0.254*
		-34	-0.18*	-0.35*	0.238	0.106	0.058	0.162	0.134	0.064	0.254*
		-33.9	-0.18*	-0.35*	0.338	0.106	0.158	0.162	0.134	0.064	0.254*
		-33.8	-0.18*	-0.35*	0.338	0.106	0.158	0.162	0.134	0.064	0.254*
		-33.7	0.02*	-0.25*	0.338	0.106	0.158	0.162	0.134	0.064	0.254*
		-33.6	-0.08*	-0.35*	0.338	0.106	0.058	0.062	0.234	0.064	0.254*
		-33.5	-0.08*	-0.35*	0.338	0.106	-0.042	0.062	0.234	0.164	0.254*
		-33.4	-0.08*	-0.35*	0.238	0.106	-0.042	0.062	0.234	0.164	0.254*
		-33.3	-0.08*	-0.35*	0.338	0.106	-0.042	0.062	0.334	0.264	0.254*
		-33.2	-0.08*	-0.35*	0.438	0.206	0.058	0.162	0.334	0.264	0.254*
		-33.1	-0.08*	-0.35*	0.438	0.306	0.058	0.162	0.334	0.164	0.254*
		-33	-0.08*	-0.35*	0.438	0.206	0.058	0.162	0.334	0.164	0.254*
		-32.9	-0.08*	-0.25*	0.338	0.106	0.158	0.162	0.234	0.064	0.254*
		-32.8	-0.08*	-0.25*	0.338	0.106	0.158	0.062	0.234	0.164	0.354*
		-32.7	-0.08*	-0.25*	0.338	0.106	0.158	0.162	0.234	0.164	0.354*
		-32.6	-0.08*	-0.25*	0.338	0.106	0.258	0.262	0.234	0.164	0.354*
		-32.5	-0.08*	-0.25*	0.438	0.106	0.258	0.262	0.134	0.064	0.154*
		-32.4	-0.08*	-0.25*	0.338	0.106	0.158	0.162	0.134	0.064	0.154*
		-32.3	-0.08*	-0.25*	0.338	0.106	0.058	0.162	0.134	0.064	0.154*
		-32.2	0.02*	-0.25*	0.338	0.106	0.058	0.162	0.134	0.064	0.254*
		-32.1	0.02*	-0.25*	0.238	0.006	0.158	0.162	0.234	0.164	0.354*
		-32	-0.08*	-0.35*	0.238	0.006	0.158	0.162	0.234	0.264	0.354*
		-31.9	0.02*	-0.15*	0.338	0.206	0.058	0.162	0.134	0.164	0.354*
		-31.8	-0.08*	-0.15*	0.338	0.206	0.058	0.062	0.134	0.164	0.354*
		-31.7	-0.08*	-0.15*	0.438	0.206	0.158	0.262	0.134	0.064	0.354*
		-31.6	-0.08*	-0.25*	0.438	0.206	0.158	0.262	0.234	0.064	0.254*
		-31.5	0.02*	-0.25*	0.438	0.106	0.158	0.162	0.234	0.064	0.254*
		-31.4	0.02*	-0.25*	0.438	0.106	0.158	0.162	0.234	0.064	0.254*
		-31.3	0.02*	-0.25*	0.338	0.006	0.158	0.162	0.134	-0.036	0.254*
		-31.2	0.12*	-0.15*	0.238	0.006	0.158	0.062	0.134	0.064	0.254*
		-31.1	0.12*	-0.15*	0.238	0.006	0.158	0.062	0.134	0.064	0.254*
		-31	0.12*	-0.15*	0.338	0.106	0.058	0.062	0.134	0.064	0.254*
		-30.9	0.12*	-0.15*	0.338	0.106	0.158	0.262	0.034	0.064	0.254*
		-30.8	0.02*	-0.25*	0.438	0.206	0.158	0.262	0.134	0.064	0.254*
		-30.7	0.02*	-0.15*	0.338	0.106	0.158	0.262	0.134	0.064	0.254*
		-30.6	0.02*	-0.15*	0.338	0.106	0.058	0.162	0.134	0.164	0.254*
		-30.5	0.02*	-0.15*	0.338	0.106	0.158	0.162	0.134	0.164	0.254*
		-30.4	0.02*	-0.15*	0.338	0.106	0.158	0.162	0.134	0.164	0.254*
		-30.3	0.02*	-0.15*	0.338	0.106	0.158	0.162	0.134	0.164	0.254*
		-30.2	0.02*	-0.15*	0.238	0.006	0.158	0.162	0.234	0.064	0.154*
		-30.1	0.02*	-0.15*	0.138	0.106	0.158	0.162	0.034	-0.036	0.254*
		-30	0.12*	-0.15*	0.338	0.206	0.158	0.162	0.034	-0.036	0.254*
		-29.9	0.12*	-0.15*	0.338	0.206	0.158	0.162	0.034	0.064	0.254*
		-29.8	0.02*	-0.15*	0.338	0.206	0.158	0.062	0.034	0.064	0.254*
		-29.7	0.02*	-0.05*	0.338	0.106	0.158	0.162	0.134	0.064	0.254*
		-29.6	0.02*	-0.05*	0.338	0.106	0.158	0.162	0.134	0.064	0.254*
		-29.5	0.02*	-0.05*	0.338	0.106	0.158	0.162	0.034	-0.036	0.254*
		-29.4	0.02*	-0.05*	0.238	0.006	0.158	0.162	0.034	-0.036	0.254*
		-29.3	0.02*	-0.05*	0.338	0.106	0.158	0.262	0.034	-0.036	0.154*
		-29.2	0.02*	-0.05*	0.338	0.106	0.258	0.262	0.134	0.064	0.154*
		-29.1	0.02*	0.05*	0.438	0.206	0.258	0.262	0.234	0.064	0.254*
		-29	0.02*	0.05*	0.338	0.206	0.158	0.062	0.234	0.064	0.254*
		-28.9	0.02*	0.05*	0.238	0.206	0.158	0.062	0.034	-0.036	0.254*
		-28.8	0.02*	-0.05*	0.238	0.206	0.158	0.162	0.034	-0.036	0.254*
		-28.7	0.02*	-0.05*	0.338	0.106	0.158	0.162	0.034	-0.036	0.254*
		-28.6	-0.08*	-0.15*	0.338	0.106	0.058	0.162	0.134	-0.036	0.154*
		-28.5	0.02*	-0.05*	0.338	0.106	0.158	0.162	0.134	0.064	0.254*
		-28.4	0.02*	-0.05*	0.338	0.106	0.058	0.062	0.134	0.064	0.154*
		-28.3	0.02*	-0.05*	0.338	0.106	0.058	0.062	0.034	0.064	0.154*
		-28.2	0.02*	-0.05*	0.338	0.206	0.158	0.162	-0.066	-0.136	0.154*
		-28.1	0.12*	0.05*	0.338	0.206	0.158	0.262	0.034	-0.036	0.154*
		-28	0.22*	0.15*	0.338	0.206	0.158	0.262	0.134	-0.036	0.154*
		-27.9	0.02*	-0.05*	0.338	0.206	0.158	0.162	0.134	0.064	0.254*
		-27.8	0.02*	-0.05*	0.338	0.206	0.158	0.162	0.134	0.064	0.254*
		-27.7	0.02*	-0.05*	0.338	0.206	0.158	0.162	0.134	0.064	0.254*
		-27.6	0.02*	-0.05*	0.338	0.106	0.058	0.062	0.134	-0.036	0.154*
		-27.5	0.02*	-0.15*	0.338	0.106	0.058	0.162	0.134	-0.036	0.154*
		-27.4	0.02*	-0.05*	0.338	0.106	0.158	0.262	0.034	-0.136	0.154*
		-27.3	0.02*	-0.05*	0.238	0.106	0.258	0.262	0.034	-0.036	0.154*
		-27.2	0.02*	-0.05*	0.238	0.206	0.258	0.262	0.034	-0.036	0.254*
		-27.1	0.02*	-0.15*	0.238	0.206	0.158	0.062	0.034	-0.036	0.254*
		-27	-0.18*	-0.25*	0.338	0.206	0.158	0.162	0.034	-0.036	0.154*
		-26.9	-0.08*	-0.25*	0.338	0.206	0.158	0.162	0.134	-0.136	0.154*
		-26.8	0.02*	-0.05*	0.338	0.206	0.158	0.162	0.234	0.064	0.154*
		-26.7	0.02*	-0.05*	0.338	0.206	0.158	0.162	0.134	-0.036	0.154*
		-26.6	0.02*	-0.05*	0.238	0.106	0.158	0.262	0.034	-0.036	0.254*
		-26.5	0.02*	-0.15*	0.338	0.106	0.058	0.162	0.034	-0.036	0.254*
		-26.4	-0.08*	-0.15*	0.338	0.106	0.058	0.162	0.134	-0.036	0.154*
		-26.3	0.02*	-0.15*	0.338	0.106	0.158	0.262	0.134	0.064	0.154*
		-26.2	0.02*	-0.15*	0.238	0.106	0.258	0.362	0.234	0.164	0.154*
		-26.1	0.12*	-0.05*	0.138	0.006	0.258	0.362	0.234	0.064	0.254*
		-26	0.12*	-0.05*	0.238	0.006	0.158	0.162	0.034	-0.036	0.254*
		-25.9	0.02*	-0.15*	0.338	0.106	0.158	0.162	0.134	-0.036	0.254*
		-25.8	0.02*	-0.15*	0.338	0.106	0.058	0.162	0.134	-0.036	0.154*
		-25.7	0.12*	-0.15*	0.338	0.106	0.158	0.162	0.134	0.064	0.154*
		-25.6	0.02*	-0.15*	0.338	0.206	0.058	0.162	0.234	0.164	0.154*
		-25.5	0.02*	-0.15*	0.238	0.106	0.158	0.262	0.134	0.064	0.154*
		-25.4	0.02*	-0.15*	0.238	0.106	0.158	0.262	0.134	0.064	0.254*
		-25.3	-0.08*	-0.15*	0.238	0.106	0.158	0.262	0.134	0.164	0.254*
		-25.2	0.02*	-0.05*	0.238	0.006	0.158	0.262	0.134	0.164	0.254*
		-25.1	0.12*	-0.15*	0.238	0.106	0.258	0.262	0.034	0.064	0.154*
		-25	0.12*	-0.15*	0.238	0.106	0.158	0.262	0.034	-0.036	0.254*
		-24.9	0.02*	-0.15*	0.238	0.006	0.158	0.162	0.134	0.064	0.254*
		-24.8	-0.08*	-0.25*	0.338	0.106	0.158	0.162	0.134	0.064	0.254*
		-24.7	-0.08*	-0.15*	0.338	0.106	0.058	0.162	0.134	0.064	0.254*
		-24.6	-0.08*	-0.15*	0.338	0.106	-0.042	0.062	0.134	0.064	0.154*
		-24.5	-0.08*	-0.15*	0.338	0.106	0.158	0.162	0.134	0.064	0.154*
		-24.4	-0.08*	-0.15*	0.238	0.106	0.158	0.262	0.234	0.164	0.154*
		-24.3	-0.08*	-0.15*	0.138	0.006	0.158	0.262	0.134	0.164	0.154*
		-24.2	-0.28*	-0.25*	0.138	0.006	0.158	0.262	0.034	0.064	0.254*
		-24.1	-0.18*	-0.15*	0.138	0.006	0.058	0.162	0.034	0.064	0.154*
		-24	-0.08*	-0.15*	0.138	0.006	0.058	0.162	0.034	0.064	0.054*
		-23.9	-0.08*	-0.05*	0.138	0.006	-0.042	0.162	0.034	0.064	0.154*
		-23.8	-0.08*	-0.05*	0.138	0.006	-0.042	0.162	0.034	0.064	0.154*
		-23.7	-0.08*	-0.05*	0.238	0.106	-0.042	0.062	-0.066	-0.036	0.154*
		-23.6	-0.08*	-0.05*	0.238	0.106	0.058	0.162	0.034	0.164	0.154*
		-23.5	-0.18*	-0.15*	0.138	0.006	-0.042	0.062	0.034	0.164	0.154*
		-23.4	-0.18*	-0.15*	0.138	0.106	-0.042	0.062	0.034	0.164	0.054*
		-23.3	-0.18*	-0.25*	0.138	0.106	0.058	0.062	0.034	0.064	0.054*
		-23.2	-0.28*	-0.25*	0.138	0.106	0.058	0.062	0.034	0.064	0.054*
		-23.1	-0.28*	-0.25*	0.138	0.006	0.058	0.062	0.034	-0.036	0.054*
		-23	-0.18*	-0.15*	0.238	0.006	0.058	0.062	0.034	-0.036	0.154*
		-22.9	-0.08*	-0.05*	0.238	0.006	-0.042	0.062	0.034	-0.036	0.254*
		-22.8	-0.18*	-0.15*	0.238	0.006	-0.042	0.162	0.034	-0.036	0.254*
		-22.7	-0.18*	-0.15*	0.338	0.106	0.058	0.162	0.034	-0.036	0.254*
		-22.6	-0.18*	-0.15*	0.338	0.106	0.058	0.162	0.034	0.064	0.254*
		-22.5	-0.18*	-0.15*	0.238	0.106	-0.042	0.062	0.034	0.064	0.154*
		-22.4	-0.18*	-0.15*	0.238	0.106	-0.042	0.062	-0.066	-0.036	0.154*
		-22.3	-0.18*	-0.15*	0.238	0.206	-0.042	0.062	-0.066	-0.036	0.054*
		-22.2	-0.18*	-0.15*	0.238	0.206	0.058	0.062	-0.066	-0.036	0.054*
		-22.1	-0.28*	-0.15*	0.138	0.106	0.058	0.062	0.034	0.064	0.054*
		-22	-0.28*	-0.15*	0.138	0.106	0.058	0.062	0.034	0.064	0.054*
		-21.9	-0.28*	-0.05*	0.138	0.006	-0.042	0.062	0.034	0.064	0.054*
		-21.8	-0.18*	-0.05*	0.238	0.006	-0.042	0.062	0.034	0.064	0.154*
		-21.7	-0.18*	-0.05*	0.138	0.006	-0.042	0.162	-0.066	0.064	0.154*
		-21.6	-0.28*	-0.15*	0.238	0.006	0.058	0.262	-0.066	0.064	0.254*
		-21.5	-0.28*	-0.15*	0.138	0.006	0.158	0.262	-0.066	0.164	0.154*
		-21.4	-0.18*	-0.05*	0.238	0.106	0.158	0.262	-0.066	0.064	0.154*
		-21.3	-0.18*	-0.15*	0.238	0.106	0.058	0.162	-0.066	0.064	0.154*
		-21.2	-0.18*	-0.15*	0.238	0.106	0.058	0.162	-0.066	0.064	0.154*
		-21.1	-0.18*	-0.15*	0.138	0.006	0.058	0.062	-0.166	-0.036	0.154*
		-21	-0.18*	-0.15*	0.138	0.106	0.058	0.062	-0.066	-0.036	0.054*
		-20.9	-0.18*	-0.15*	0.138	0.106	0.058	0.062	-0.066	-0.036	0.054*
		-20.8	-0.18*	-0.05*	0.138	0.106	0.058	0.062	-0.066	-0.036	0.054*
		-20.7	-0.08*	-0.05*	0.138	0.106	0.158	0.162	-0.066	-0.036	0.054*
		-20.6	-0.08*	-0.05*	0.138	0.106	0.158	0.162	-0.066	-0.036	0.054*
		-20.5	-0.18*	-0.15*	0.138	0.106	0.158	0.162	-0.066	-0.036	0.054*
		-20.4	-0.18*	-0.15*	0.138	0.106	0.158	0.162	-0.066	-0.036	0.254*
		-20.3	-0.08*	-0.05*	0.238	0.106	0.058	0.062	0.034	0.064	0.254*
		-20.2	-0.18*	-0.15*	0.238	0.006	0.058	0.062	0.034	0.064	0.254*
		-20.1	-0.18*	-0.15*	0.238	0.006	0.058	0.062	0.034	0.064	0.254*
		-20	-0.18*	-0.15*	0.138	-0.094	0.058	0.062	-0.066	-0.036	0.154*
		-19.9	-0.18*	-0.15*	0.038	-0.094	0.058	0.062	-0.066	-0.036	0.154*
		-19.8	-0.18*	-0.15*	0.138	0.006	0.058	0.162	-0.066	-0.036	0.154*
		-19.7	-0.18*	-0.15*	0.138	0.006	0.158	0.162	0.034	-0.036	0.154*
		-19.6	-0.28*	-0.25*	0.138	0.006	0.158	0.162	0.034	-0.136	0.154*
		-19.5	-0.28*	-0.25*	0.138	0.006	0.058	0.162	0.034	-0.136	0.154*
		-19.4	-0.28*	-0.25*	0.138	0.006	0.058	0.162	0.034	-0.136	0.154*
		-19.3	-0.18*	-0.25*	0.138	0.006	0.158	0.162	0.034	-0.136	0.154*
		-19.2	-0.18*	-0.25*	0.138	0.006	0.258	0.262	0.034	-0.136	0.154*
		-19.1	-0.08*	-0.15*	0.038	-0.094	0.158	0.262	0.034	-0.136	0.254*
		-19	-0.08*	-0.15*	0.038	-0.094	0.158	0.262	0.034	-0.136	0.254*
		-18.9	-0.08*	-0.15*	0.038	-0.094	0.158	0.162	-0.066	-0.236	0.254*
		-18.8	-0.08*	-0.15*	0.038	-0.094	0.058	0.062	-0.066	-0.236	0.254*
		-18.7	-0.08*	-0.15*	0.038	-0.094	-0.042	0.062	-0.066	-0.236	0.254*
		-18.6	-0.08*	-0.15*	0.138	0.006	-0.042	0.062	-0.066	-0.236	0.254*
		-18.5	-0.08*	-0.15*	0.138	0.006	-0.042	0.062	-0.066	-0.236	0.254*
		-18.4	-0.08*	-0.15*	0.138	0.006	-0.042	0.062	0.034	-0.136	0.254*
		-18.3	-0.18*	-0.25*	0.138	0.006	-0.042	0.062	-0.066	-0.136	0.154*
		-18.2	-0.28*	-0.25*	0.138	0.006	-0.042	0.062	-0.066	-0.136	0.154*
		-18.1	-0.28*	-0.25*	0.138	0.006	-0.042	0.062	-0.066	-0.136	0.154*
		-18	-0.28*	-0.25*	0.038	-0.094	-0.042	0.062	-0.066	-0.136	0.254*
		-17.9	-0.28*	-0.25*	0.038	-0.094	-0.042	0.062	-0.066	-0.136	0.254*
		-17.8	-0.28*	-0.25*	0.038	-0.094	-0.042	0.062	-0.066	-0.136	0.254*
		-17.7	-0.28*	-0.25*	0.038	-0.094	-0.042	0.062	-0.066	-0.136	0.254*
		-17.6	-0.28*	-0.25*	0.038	-0.094	-0.042	0.062	-0.066	-0.136	0.254*
		-17.5	-0.28*	-0.25*	0.038	-0.094	-0.042	0.062	-0.066	-0.136	0.254*
		-17.4	-0.28*	-0.25*	0.038	-0.194	-0.042	0.062	-0.066	-0.136	0.254*
		-17.3	-0.28*	-0.35*	0.038	-0.194	-0.042	0.062	-0.066	-0.136	0.254*
		-17.2	-0.28*	-0.35*	0.038	-0.194	-0.042	0.062	-0.066	-0.136	0.254*
		-17.1	-0.28*	-0.35*	0.038	-0.194	-0.042	0.062	-0.066	-0.136	0.254*
		-17	-0.28*	-0.35*	0.038	-0.094	-0.042	0.062	-0.166	-0.136	0.154*
		-16.9	-0.28*	-0.35*	0.038	-0.094	-0.042	0.062	-0.166	-0.136	0.154*
		-16.8	-0.28*	-0.35*	0.038	-0.094	-0.042	-0.038	-0.166	-0.236	0.254*
		-16.7	-0.28*	-0.35*	0.138	0.006	-0.042	-0.038	-0.166	-0.236	0.254*
		-16.6	-0.38*	-0.35*	0.138	0.006	-0.042	-0.038	-0.166	-0.236	0.254*
		-16.5	-0.18*	-0.15*	0.038	-0.094	-0.042	-0.038	-0.166	-0.236	0.254*
		-16.4	-0.18*	-0.15*	0.138	0.006	-0.142	-0.038	-0.166	-0.236	0.154*
		-16.3	-0.18*	-0.15*	0.138	0.006	-0.142	-0.038	-0.066	-0.136	0.154*
		-16.2	-0.18*	-0.05*	0.138	0.006	-0.142	-0.038	-0.066	-0.136	0.154*
		-16.1	-0.18*	-0.15*	0.138	0.006	-0.142	-0.038	-0.066	-0.136	0.154*
		-16	-0.18*	-0.25*	0.138	-0.094	-0.142	-0.038	-0.066	-0.136	0.154*
		-15.9	-0.18*	-0.15*	0.138	-0.094	-0.142	-0.038	-0.066	-0.136	0.154*
		-15.8	-0.18*	-0.15*	0.138	-0.094	-0.142	-0.038	-0.066	-0.136	0.154*
		-15.7	-0.18*	-0.25*	0.138	-0.094	-0.142	-0.038	-0.066	-0.136	0.154*
		-15.6	-0.18*	-0.25*	0.138	-0.094	-0.142	-0.038	-0.066	-0.136	0.154*
		-15.5	-0.18*	-0.25*	0.138	-0.094	-0.142	-0.138	-0.066	-0.136	0.154*
		-15.4	-0.18*	-0.25*	0.138	-0.094	-0.142	-0.138	-0.066	-0.136	0.154*
		-15.3	-0.18*	-0.25*	0.138	-0.094	-0.142	-0.138	-0.066	-0.136	0.154*
		-15.2	-0.18*	-0.25*	0.138	-0.094	-0.142	-0.138	-0.066	-0.136	0.154*
		-15.1	-0.18*	-0.25*	0.038	-0.094	-0.142	-0.138	-0.066	-0.136	0.154*
		-15	-0.18*	-0.25*	0.038	-0.094	-0.142	-0.138	-0.066	-0.136	0.054*
		-14.9	-0.18*	-0.25*	0.038	-0.094	-0.142	-0.138	-0.066	-0.136	0.054*
		-14.8	-0.18*	-0.25*	0.038	-0.094	-0.142	-0.138	-0.066	-0.136	0.054*
		-14.7	-0.28*	-0.25*	0.038	-0.094	-0.042	-0.038	0.034	-0.036	0.054*
		-14.6	-0.28*	-0.25*	0.038	-0.094	-0.042	-0.038	0.034	-0.036	0.054*
		-14.5	-0.28*	-0.25*	0.038	-0.094	-0.042	-0.038	-0.066	-0.036	0.054*
		-14.4	-0.28*	-0.25*	0.038	-0.094	-0.142	-0.138	-0.066	-0.036	0.054*
		-14.3	-0.28*	-0.25*	0.038	-0.094	-0.142	-0.138	-0.066	-0.036	0.154*
		-14.2	-0.28*	-0.25*	0.038	-0.094	-0.142	-0.138	-0.066	-0.036	0.154*
		-14.1	-0.28*	-0.25*	0.038	-0.094	-0.142	-0.138	-0.066	-0.036	0.154*
		-14	-0.28*	-0.25*	0.038	-0.094	-0.242	-0.138	-0.066	-0.036	0.054*
		-13.9	-0.28*	-0.25*	0.038	-0.094	-0.242	-0.138	-0.066	-0.036	0.054*
		-13.8	-0.28*	-0.25*	0.038	-0.094	-0.242	-0.138	-0.066	-0.036	-0.046*
		-13.7	-0.18*	-0.15*	0.038	-0.094	-0.242	-0.138	-0.066	-0.036	-0.046*
		-13.6	-0.18*	-0.15*	0.038	-0.094	-0.242	-0.138	-0.066	-0.136	-0.046*
		-13.5	-0.18*	-0.15*	0.038	-0.094	-0.242	-0.138	-0.066	-0.136	0.054*
		-13.4	-0.18*	-0.15*	0.038	0.006	-0.242	-0.138	-0.066	-0.136	0.154*
		-13.3	-0.18*	-0.15*	0.038	0.006	-0.142	-0.138	-0.066	-0.136	0.154*
		-13.2	-0.18*	-0.15*	0.038	0.006	-0.142	-0.138	-0.066	-0.136	0.154*
		-13.1	-0.18*	-0.15*	0.038	0.106	-0.142	-0.138	-0.066	-0.136	0.154*
		-13	-0.18*	-0.15*	0.038	0.006	-0.142	-0.238	-0.066	-0.136	0.154*
		-12.9	-0.28*	-0.15*	0.038	0.006	-0.142	-0.238	-0.066	-0.136	0.154*
		-12.8	-0.28*	-0.15*	0.038	0.006	-0.142	-0.238	-0.066	-0.136	0.054*
		-12.7	-0.28*	-0.15*	0.038	0.006	-0.142	-0.238	-0.066	-0.136	-0.046*
		-12.6	-0.28*	-0.15*	0.038	0.006	-0.142	-0.238	-0.066	-0.136	-0.046*
		-12.5	-0.28*	-0.15*	0.038	0.006	-0.042	-0.138	-0.066	-0.136	-0.046*
		-12.4	-0.28*	-0.15*	0.038	0.006	-0.042	-0.138	-0.066	-0.136	-0.046*
		-12.3	-0.28*	-0.15*	0.038	0.006	-0.042	-0.138	-0.066	-0.136	-0.046*
		-12.2	-0.28*	-0.15*	0.038	0.006	-0.042	-0.138	-0.066	-0.136	-0.046*
		-12.1	-0.28*	-0.15*	0.038	0.006	-0.042	-0.138	-0.066	-0.036	0.054*
		-12	-0.28*	-0.15*	0.038	0.006	-0.142	-0.038	-0.066	-0.036	0.054*
		-11.9	-0.28*	-0.15*	0.038	0.006	-0.142	-0.038	-0.066	-0.036	0.054*
		-11.8	-0.18*	-0.05*	-0.062	0.006	-0.042	0.062	-0.066	-0.036	0.054*
		-11.7	-0.18*	-0.05*	-0.062	0.006	-0.042	0.062	-0.066	-0.136	0.054*
		-11.6	-0.18*	-0.05*	-0.062	-0.094	-0.142	-0.038	-0.066	-0.136	0.054*
		-11.5	-0.18*	-0.05*	-0.062	-0.094	-0.142	-0.038	-0.066	-0.136	0.054*
		-11.4	-0.18*	-0.05*	-0.062	-0.094	-0.042	0.062	-0.066	-0.136	0.054*
		-11.3	-0.18*	-0.05*	-0.062	-0.094	-0.042	0.062	-0.066	-0.136	0.054*
		-11.2	-0.18*	-0.05*	-0.062	-0.094	-0.042	0.062	0.034	-0.136	0.054*
		-11.1	-0.18*	-0.05*	0.038	0.006	-0.042	0.062	-0.066	-0.236	0.054*
		-11	-0.18*	-0.05*	0.038	0.006	-0.042	0.062	-0.066	-0.236	0.054*
		-10.9	-0.18*	-0.05*	0.038	0.006	-0.042	0.062	-0.066	-0.236	-0.046*
		-10.8	-0.18*	-0.05*	0.038	0.006	-0.042	0.062	-0.066	-0.236	-0.046*
		-10.7	-0.18*	-0.05*	0.038	0.006	-0.042	0.062	-0.166	-0.236	-0.046*
		-10.6	-0.18*	-0.05*	0.038	0.006	-0.042	0.062	-0.166	-0.236	0.054*
		-10.5	-0.18*	-0.15*	0.038	0.006	0.058	0.162	-0.166	-0.236	0.154*
		-10.4	-0.18*	-0.15*	-0.062	0.006	0.058	0.162	-0.166	-0.236	0.054*
		-10.3	-0.18*	-0.15*	-0.062	0.006	0.058	0.162	-0.166	-0.236	0.054*
		-10.2	-0.18*	-0.15*	-0.062	0.006	0.058	0.162	-0.166	-0.236	0.054*
		-10.1	-0.18*	-0.15*	-0.062	0.006	0.058	0.062	-0.166	-0.236	0.054*
		-10	-0.18*	-0.15*	-0.062	0.006	0.058	0.062	-0.166	-0.236	0.054*
		-9.9	-0.18*	-0.15*	-0.062	0.006	0.058	0.062	-0.166	-0.236	0.054*
		-9.8	-0.18*	-0.15*	-0.062	0.006	0.058	0.062	-0.166	-0.236	0.054*
		-9.7	-0.08*	-0.05*	-0.062	0.006	0.058	0.062	-0.166	-0.236	0.054*
		-9.6	-0.08*	-0.05*	-0.062	0.006	0.058	0.062	-0.166	-0.236	0.054*
		-9.5	-0.08*	-0.05*	-0.062	0.006	0.058	0.062	-0.066	-0.136	0.054*
		-9.4	-0.08*	-0.05*	-0.062	0.006	0.058	0.062	-0.066	-0.136	0.054*
		-9.3	-0.08*	-0.05*	-0.062	0.006	0.058	0.062	-0.066	-0.136	0.054*
		-9.2	-0.08*	-0.05*	-0.062	0.006	0.058	0.062	-0.066	-0.136	0.054*
		-9.1	-0.08*	-0.05*	-0.062	-0.094	0.058	0.062	-0.066	-0.136	0.054*
		-9	0.02*	-0.05*	-0.062	-0.094	0.058	0.062	-0.066	-0.136	0.054*
		-8.9	0.02*	-0.05*	-0.062	-0.094	0.058	0.062	-0.066	-0.136	0.054*
		-8.8	0.02*	-0.05*	0.038	0.006	0.058	0.062	-0.066	-0.036	0.054*
		-8.7	0.02*	-0.05*	0.038	0.006	0.058	0.062	0.034	0.064	0.054*
		-8.6	0.02*	-0.05*	0.038	0.006	0.058	0.062	0.034	0.064	0.054*
		-8.5	0.02*	0.05*	-0.062	0.006	0.058	-0.038	0.034	0.064	0.054*
		-8.4	0.02*	0.05*	-0.062	0.006	0.058	-0.038	0.034	0.064	0.054*
		-8.3	0.02*	0.05*	-0.062	0.006	0.058	-0.038	0.034	0.064	0.054*
		-8.2	0.02*	0.05*	-0.062	0.006	0.058	-0.038	0.034	0.064	-0.046*
		-8.1	0.02*	0.05*	-0.062	0.006	0.058	-0.038	0.034	0.064	-0.046*
		-8	0.02*	0.05*	-0.062	0.006	-0.042	-0.038	0.034	0.064	-0.046*
		-7.9	0.02*	0.05*	-0.062	0.006	-0.042	-0.038	0.034	0.064	-0.046*
		-7.8	0.02*	0.05*	0.038	0.006	-0.042	-0.038	0.034	0.064	-0.046*
		-7.7	0.02*	0.05*	0.038	0.006	-0.042	-0.038	0.034	0.064	-0.046*
		-7.6	0.02*	0.05*	0.038	0.006	-0.042	-0.038	-0.066	0.064	-0.046*
		-7.5	0.02*	0.05*	0.038	0.006	-0.042	-0.038	-0.066	0.064	-0.046*
		-7.4	0.02*	0.05*	0.038	0.006	0.058	0.062	0.034	0.064	-0.046*
		-7.3	0.02*	0.05*	0.038	0.006	0.058	0.062	0.034	0.064	-0.046*
		-7.2	0.02*	0.05*	0.038	0.006	0.058	0.062	-0.066	-0.036	-0.046*
		-7.1	0.02*	0.05*	0.038	0.006	0.058	0.062	-0.166	-0.036	-0.146*
		-7	0.02*	0.05*	0.038	0.006	0.058	0.062	-0.066	-0.036	-0.146*
		-6.9	0.02*	0.05*	0.038	0.006	0.058	0.062	0.034	0.064	-0.146*
		-6.8	0.02*	0.05*	0.038	0.006	0.058	0.062	0.034	0.064	-0.046*
		-6.7	0.02*	0.05*	0.038	0.006	-0.042	-0.038	0.034	0.064	-0.046*
		-6.6	0.02*	0.05*	0.038	0.006	-0.042	-0.038	0.034	0.064	-0.046*
		-6.5	0.02*	0.05*	0.038	0.006	-0.042	-0.038	0.034	0.064	-0.046*
		-6.4	0.12*	0.05*	0.038	0.006	-0.042	-0.038	0.134	0.164	0.054*
		-6.3	0.12*	0.05*	0.038	0.006	-0.042	-0.038	0.134	0.164	0.054*
		-6.2	0.12*	0.05*	0.038	0.006	-0.042	-0.038	0.134	0.164	0.054*
		-6.1	0.02*	-0.05*	0.038	0.006	-0.042	-0.038	0.134	0.164	0.054*
		-6	0.02*	-0.05*	0.038	0.006	-0.042	-0.038	0.134	0.164	0.054*
		-5.9	0.02*	-0.05*	0.038	0.006	-0.042	-0.038	0.134	0.164	0.054*
		-5.8	0.02*	-0.05*	0.038	0.006	-0.042	-0.038	0.034	-0.036	0.054*
		-5.7	0.02*	-0.05*	0.038	0.006	-0.042	-0.038	0.034	0.064	0.054*
		-5.6	0.02*	-0.05*	0.038	0.006	-0.142	-0.038	0.034	0.064	-0.046*
		-5.5	0.02*	-0.05*	0.038	0.006	-0.142	-0.038	0.034	-0.036	-0.046*
		-5.4	0.02*	0.05*	0.038	0.006	-0.142	-0.138	0.034	-0.036	-0.046*
		-5.3	0.02*	0.05*	0.038	0.006	-0.142	-0.038	0.034	-0.036	-0.046*
		-5.2	0.02*	0.05*	0.038	0.006	-0.142	-0.138	0.034	-0.036	-0.046*
		-5.1	0.02*	0.05*	0.038	0.006	-0.142	-0.138	0.134	0.064	-0.046*
		-5	0.02*	0.05*	0.038	0.006	-0.142	-0.138	0.034	-0.036	-0.046*
		-4.9	0.02*	0.05*	0.038	0.006	-0.142	-0.138	0.034	-0.036	-0.046*
		-4.8	0.02*	0.05*	0.038	0.006	-0.142	-0.138	0.034	-0.036	-0.046*
		-4.7	0.02*	0.05*	0.038	0.006	-0.042	-0.038	0.034	-0.036	-0.046*
		-4.6	0.02*	0.05*	0.038	0.006	-0.042	-0.038	0.034	-0.036	-0.046*
		-4.5	0.02*	0.05*	0.038	0.006	-0.042	-0.038	0.034	-0.036	-0.046*
		-4.4	0.02*	-0.05*	0.038	0.006	-0.042	-0.038	0.034	-0.036	-0.046*
		-4.3	0.02*	-0.05*	0.138	0.106	-0.042	-0.038	0.034	-0.036	-0.046*
		-4.2	0.02*	-0.05*	0.138	0.106	-0.042	-0.038	-0.066	-0.036	-0.046*
		-4.1	0.12*	0.05*	0.138	0.106	-0.042	-0.038	-0.066	-0.036	-0.046*
		-4	0.12*	0.05*	0.138	0.106	-0.042	-0.038	0.034	0.064	0.054*
		-3.9	0.12*	0.05*	0.138	0.106	-0.042	-0.038	0.034	0.064	0.054*
		-3.8	0.12*	0.05*	0.138	0.006	-0.042	-0.038	0.034	-0.036	0.054*
		-3.7	0.12*	0.05*	0.138	0.106	-0.042	-0.038	0.034	-0.036	0.054*
		-3.6	0.12*	0.05*	0.138	0.106	-0.142	-0.038	0.034	-0.036	0.054*
		-3.5	0.12*	0.05*	0.138	0.106	-0.142	-0.038	0.034	-0.036	0.054*
		-3.4	0.12*	0.05*	0.138	0.106	-0.142	-0.038	0.034	-0.036	0.154*
		-3.3	0.12*	0.05*	0.138	0.006	-0.142	-0.038	0.034	0.064	0.154*
		-3.2	0.12*	0.05*	0.138	0.006	-0.142	-0.038	0.034	0.064	0.154*
		-3.1	0.12*	0.05*	0.138	0.006	-0.142	-0.038	0.034	-0.036	0.154*
		-3	0.12*	0.05*	0.138	0.006	-0.042	0.062	0.034	-0.036	0.154*
		-2.9	0.12*	0.05*	0.138	0.006	-0.042	0.062	0.034	-0.036	0.154*
		-2.8	0.12*	0.05*	0.138	0.006	-0.042	0.062	0.034	-0.036	0.154*
		-2.7	0.02*	-0.05*	0.238	0.106	-0.042	0.062	0.034	-0.036	0.154*
		-2.6	0.02*	-0.15*	0.238	0.106	-0.042	0.062	0.034	-0.036	0.154*
		-2.5	0.12*	-0.05*	0.238	0.106	-0.042	0.062	0.134	0.064	0.154*
		-2.4	0.12*	-0.05*	0.238	0.106	-0.042	0.062	0.134	0.064	0.154*
		-2.3	0.02*	-0.05*	0.238	0.106	-0.042	0.062	0.134	0.064	0.054*
		-2.2	0.02*	-0.05*	0.238	0.106	-0.042	0.062	0.134	0.064	0.054*
		-2.1	0.02*	-0.05*	0.138	0.106	-0.042	0.062	0.134	0.064	0.054*
		-2	0.02*	-0.05*	0.138	0.106	-0.042	-0.038	0.134	0.064	0.054*
		-1.9	0.12*	0.05*	0.138	0.106	0.058	0.062	0.134	-0.036	0.054*
		-1.8	0.12*	0.05*	0.138	0.106	0.058	0.062	0.134	0.064	0.054*
		-1.7	0.12*	0.05*	0.138	0.106	0.058	0.062	0.134	-0.036	0.154*
		-1.6	0.12*	0.05*	0.138	0.006	0.158	0.162	0.134	-0.036	0.154*
		-1.5	0.02*	-0.05*	0.138	0.006	0.158	0.162	0.034	-0.036	0.054*
		-1.4	0.12*	-0.05*	0.138	0.006	0.058	0.062	0.134	0.064	0.054*
		-1.3	0.02*	-0.05*	0.138	0.006	0.058	0.062	0.234	0.064	0.054*
		-1.2	0.02*	-0.05*	0.138	0.006	0.058	0.162	0.134	-0.036	0.054*
		-1.1	-0.08*	-0.15*	0.138	0.106	0.058	0.162	0.134	-0.036	0.154*
		-1	-0.18*	-0.15*	0.038	0.006	0.058	0.362	0.034	-0.136	-0.146*
		-0.9	-0.88*	-0.75*	0.238	0.206	0.158	0.262	0.034	-0.136	-0.746*
		-0.8	-1.88*	-2.35*	-1.662	-1.694	0.258	1.062	-0.166	0.464	-2.346*
		-0.7	-0.78*	-0.85*	-0.962	-0.494	-0.542	0.662	-0.466	0.364	-0.946*
		-0.6	-0.58*	-0.65*	-0.362	-0.394	-0.342	0.262	0.134	0.364	-0.246*
		-0.5	-0.28*	-0.35*	-0.262	-0.394	0.258	0.162	-0.066	-0.136	0.154*
		-0.4	-0.38*	-0.35*	0.138	0.006	-0.042	-0.038	-0.266	-0.036	0.054*
		-0.3	0.22*	0.05*	-0.062	0.006	0.358	0.262	0.334	0.164	0.054*
		-0.2	0.02*	0.15*	0.138	0.006	-0.042	0.062	0.034	-0.136	0.854*
		-0.1	0.92*	1.35*	0.938	1.006	0.158	0.662	0.034	0.064	1.554*
		0	0.02*	2.75*	2.638	2.806	-0.242	0.462	-0.266	-0.436	3.454*
		0.1	-0.68*	4.45*	4.838	4.306	0.458	-0.138	-0.366	-1.436	5.554*
		0.2	-0.08*	4.15*	4.838	4.506	0.158	-0.938	-0.466	-1.536	4.754*
		0.3	-0.28*	3.35*	3.538	3.406	-0.042	-0.238	-0.266	-0.936	3.454*
		0.4	-0.48*	2.45*	3.038	2.706	0.058	0.162	0.334	0.964	2.354*
		0.5	-0.48*	2.05*	2.238	2.306	0.058	0.562	1.034	2.064	1.854*
		0.6	-0.28*	1.95*	1.838	1.706	0.558	1.062	1.534	3.264	1.354*
		0.7	0.12*	1.55*	1.738	1.606	0.858	1.562	2.134	3.864	1.054*
		0.8	0.02*	1.35*	1.738	1.706	0.958	1.762	2.734	5.164	1.054*
		0.9	0.42*	1.55*	1.638	1.706	1.558	2.262	3.234	6.064	1.154*
		1	-0.18*	0.95*	1.738	2.006	1.058	2.162	4.534	6.864	1.154*
		1.1	0.12*	0.85*	1.638	1.706	1.458	2.562	4.734	7.564	0.654*
		1.2	0.62*	1.25*	1.538	1.806	1.658	2.962	4.934	7.864	0.754*
		1.3	0.72*	1.35*	1.238	1.606	1.658	3.562	5.234	8.464	0.554*
		1.4	0.52*	1.35*	1.338	1.806	1.758	3.462	5.534	8.764	0.254*
		1.5	0.32*	1.05*	1.238	1.706	1.958	3.662	5.934	9.364	0.554*
		1.6	0.32*	0.85*	1.338	1.806	1.958	3.562	6.534	9.964	0.654*
		1.7	0.42*	0.75*	1.438	1.806	2.158	3.762	6.734	10.164	0.654*
		1.8	0.42*	0.85*	1.238	1.506	2.258	4.062	7.234	10.664	0.754*
		1.9	0.52*	0.95*	1.238	1.706	2.558	4.562	7.434	10.964	0.654*
		2	0.32*	0.85*	1.238	1.806	2.858	4.862	7.734	11.164	0.654*
		2.1	0.42*	1.05*	1.238	2.006	3.058	5.162	7.934	11.464	0.554*
		2.2	0.42*	1.05*	1.338	2.006	3.058	5.262	8.134	11.764	0.554*
		2.3	0.42*	0.95*	1.238	2.106	3.158	5.562	8.334	11.964	0.654*
		2.4	0.42*	0.85*	1.338	2.206	3.258	5.562	8.634	12.164	0.554*
		2.5	0.42*	0.95*	1.538	2.306	3.158	5.662	9.034	12.264	0.454*
		2.6	0.22*	0.75*	1.538	2.306	3.158	5.662	9.334	12.564	0.454*
		2.7	0.32*	0.85*	1.538	2.206	3.458	5.862	9.434	12.664	0.454*
		2.8	0.32*	0.75*	1.438	2.306	3.458	6.262	9.634	12.864	0.554*
		2.9	0.22*	0.65*	1.438	2.406	3.658	6.462	10.034	13.164	0.454*
		3	0.22*	0.65*	1.538	2.406	3.758	6.662	10.034	13.164	0.454*
		3.1	0.22*	0.75*	1.338	2.406	3.858	6.862	10.334	13.364	0.554*
		3.2	0.12*	0.65*	1.538	2.406	4.058	7.062	10.434	13.464	0.454*
		3.3	0.22*	0.75*	1.538	2.406	4.158	7.162	10.534	13.464	0.554*
		3.4	0.22*	0.75*	1.438	2.506	4.258	7.262	10.634	13.464	0.554*
		3.5	0.42*	0.95*	1.638	2.506	4.358	7.462	10.934	13.764	0.654*
		3.6	0.42*	0.95*	1.438	2.506	4.458	7.462	11.034	13.764	0.654*
		3.7	0.52*	1.05*	1.638	2.806	4.458	7.562	11.234	13.864	0.554*
		3.8	0.42*	0.95*	1.738	2.806	4.658	7.762	11.334	13.864	0.454*
		3.9	0.42*	1.05*	1.738	2.806	4.758	7.862	11.434	14.064	0.554*
		4	0.32*	0.85*	1.738	2.906	4.858	8.062	11.634	14.164	0.554*
		4.1	0.32*	0.85*	1.838	3.006	4.958	8.262	11.634	14.064	0.554*
		4.2	0.32*	0.85*	1.938	3.106	5.158	8.362	11.734	14.064	0.554*
		4.3	0.32*	0.85*	1.938	3.206	5.158	8.362	11.934	14.064	0.654*
		4.4	0.42*	0.85*	2.038	3.206	5.258	8.462	11.834	13.964	0.754*
		4.5	0.42*	0.95*	1.938	3.106	5.358	8.562	12.034	13.964	0.654*
		4.6	0.42*	0.95*	1.938	3.206	5.458	8.662	12.034	14.164	0.554*
		4.7	0.42*	0.95*	1.938	3.206	5.558	8.762	12.234	14.164	0.454*
		4.8	0.32*	0.85*	2.038	3.306	5.758	8.962	12.334	14.164	0.454*
		4.9	0.42*	1.05*	2.038	3.306	5.758	9.162	12.334	14.164	0.454*
		5	0.32*	0.95*	2.138	3.506	5.758	9.162	12.534	14.364	0.454*
		5.1	0.42*	1.05*	2.138	3.606	6.058	9.362	12.534	14.264	0.454*
		5.2	0.52*	1.15*	2.138	3.506	6.058	9.262	12.834	14.464	0.454*
		5.3	0.52*	1.25*	2.138	3.506	6.058	9.462	12.834	14.364	0.454*
		5.4	0.52*	1.15*	2.238	3.706	6.158	9.562	12.734	14.364	0.554*
		5.5	0.62*	1.15*	2.338	3.806	6.158	9.662	12.934	14.364	0.454*
		5.6	0.62*	1.25*	2.438	3.906	6.358	9.762	13.034	14.464	0.454*
		5.7	0.72*	1.35*	2.338	3.906	6.358	9.862	13.234	14.564	0.554*
		5.8	0.62*	1.35*	2.438	4.006	6.458	9.862	13.134	14.364	0.554*
		5.9	0.62*	1.35*	2.438	4.006	6.458	9.962	13.334	14.564	0.554*
		6	0.72*	1.45*	2.438	4.006	6.558	10.062	13.334	14.564	0.554*
		6.1	0.62*	1.45*	2.438	4.006	6.658	10.162	13.234	14.464	0.554*
		6.2	0.72*	1.35*	2.438	4.006	6.658	10.162	13.434	14.664	0.654*
		6.3	0.62*	1.45*	2.538	4.106	6.858	10.462	13.434	14.464	0.554*
		6.4	0.62*	1.45*	2.538	4.206	7.058	10.462	13.634	14.664	0.754*
		6.5	0.72*	1.45*	2.638	4.206	6.958	10.462	13.434	14.564	0.654*
		6.6	0.62*	1.45*	2.538	4.306	7.158	10.662	13.634	14.664	0.754*
		6.7	0.72*	1.45*	2.638	4.406	7.158	10.662	13.634	14.664	0.654*
		6.8	0.72*	1.45*	2.638	4.406	7.358	10.762	13.734	14.664	0.654*
		6.9	0.62*	1.35*	2.738	4.506	7.358	10.762	13.734	14.664	0.654*
		7	0.62*	1.35*	2.738	4.506	7.458	10.962	13.634	14.664	0.754*
		7.1	0.62*	1.45*	2.838	4.706	7.458	10.962	13.734	14.564	0.654*
		7.2	0.82*	1.65*	2.738	4.606	7.658	11.162	13.934	14.764	0.654*
		7.3	0.82*	1.55*	2.838	4.706	7.758	11.162	13.834	14.664	0.654*
		7.4	0.82*	1.55*	2.938	4.806	7.758	11.262	13.934	14.764	0.754*
		7.5	0.82*	1.55*	2.938	4.806	7.758	11.362	14.034	14.764	0.754*
		7.6	0.82*	1.65*	3.138	5.006	7.858	11.462	13.934	14.764	0.754*
		7.7	0.72*	1.55*	3.038	4.906	7.958	11.462	13.934	14.764	0.754*
		7.8	0.82*	1.65*	3.038	4.906	7.858	11.462	14.134	14.764	0.854*
		7.9	0.82*	1.75*	3.238	5.006	8.058	11.662	14.134	14.664	0.754*
		8	0.82*	1.65*	3.038	5.006	8.058	11.762	14.034	14.764	0.854*
		8.1	0.82*	1.65*	3.238	5.106	8.058	11.562	14.134	14.764	0.954*
		8.2	0.72*	1.75*	3.138	5.006	8.258	11.762	14.234	14.764	0.754*
		8.3	0.82*	1.75*	3.138	5.106	8.258	11.762	14.234	14.664	0.954*
		8.4	0.82*	1.75*	3.138	5.106	8.258	11.862	14.134	14.664	0.954*
		8.5	0.72*	1.65*	3.238	5.306	8.258	11.862	14.334	14.764	0.954*
		8.6	0.82*	1.75*	3.338	5.306	8.358	11.862	14.234	14.764	0.954*
		8.7	0.72*	1.65*	3.338	5.306	8.458	11.862	14.334	14.764	0.954*
		8.8	0.72*	1.55*	3.338	5.306	8.458	11.962	14.234	14.764	1.054*
		8.9	0.72*	1.65*	3.338	5.306	8.458	11.862	14.334	14.764	0.954*
		9	0.72*	1.55*	3.438	5.406	8.658	11.962	14.334	14.764	1.054*
		9.1	0.82*	1.65*	3.438	5.406	8.658	11.962	14.334	14.764	1.054*
		9.2	0.92*	1.75*	3.538	5.606	8.658	12.062	14.234	14.764	1.054*
		9.3	0.82*	1.55*	3.538	5.606	8.858	12.262	14.234	14.764	1.154*
		9.4	0.82*	1.55*	3.538	5.606	8.858	12.262	14.334	14.664	1.054*
		9.5	0.92*	1.65*	3.638	5.806	8.958	12.262	14.334	14.764	1.054*
		9.6	0.82*	1.55*	3.638	5.606	8.858	12.262	14.234	14.764	1.154*
		9.7	0.82*	1.55*	3.638	5.606	9.058	12.462	14.234	14.664	1.154*
		9.8	0.82*	1.55*	3.638	5.806	9.158	12.462	14.334	14.764	1.254*
		9.9	0.72*	1.45*	3.638	5.706	9.058	12.462	14.334	14.664	1.154*
		10	0.82*	1.55*	3.738	5.806	9.258	12.662	14.234	14.764	1.154*
		10.1	0.82*	1.55*	3.738	5.906	9.358	12.562	14.234	14.664	1.254*
		10.2	0.72*	1.55*	3.838	5.906	9.358	12.662	14.434	14.864	1.154*
		10.3	0.72*	1.55*	3.838	5.906	9.458	12.762	14.434	14.764	1.254*
		10.4	0.72*	1.55*	3.838	5.906	9.658	12.862	14.434	14.864	1.254*
		10.5	0.72*	1.65*	3.838	6.006	9.658	12.862	14.334	14.764	1.254*
		10.6	0.82*	1.75*	3.938	6.106	9.558	12.862	14.434	14.764	1.254*
		10.7	0.92*	1.75*	3.838	6.106	9.858	12.962	14.534	14.864	1.254*
		10.8	0.72*	1.75*	4.038	6.206	9.758	12.962	14.434	14.864	1.354*
		10.9	0.82*	1.85*	3.938	6.206	9.858	12.962	14.434	14.664	1.454*
		11	0.92*	1.75*	3.838	6.106	9.958	13.062	14.334	14.764	1.254*
		11.1	0.72*	1.75*	4.038	6.306	9.958	13.162	14.434	14.764	1.354*
		11.2	0.82*	1.85*	4.038	6.306	9.958	13.062	14.334	14.764	1.354*
		11.3	0.82*	1.75*	3.938	6.206	9.958	13.062	14.434	14.664	1.354*
		11.4	1.02*	1.85*	4.138	6.406	10.058	13.262	14.334	14.764	1.354*
		11.5	0.92*	1.85*	4.038	6.406	10.058	13.162	14.334	14.664	1.254*
		11.6	0.92*	1.85*	4.138	6.506	10.158	13.262	14.334	14.764	1.354*
		11.7	0.92*	1.75*	4.138	6.506	10.158	13.262	14.334	14.664	1.254*
		11.8	1.02*	1.95*	4.238	6.606	10.158	13.262	14.434	14.764	1.254*
		11.9	0.92*	1.85*	4.238	6.606	10.258	13.262	14.434	14.764	1.354*
		12	1.02*	1.95*	4.338	6.606	10.258	13.362	14.534	14.764	1.354*
		12.1	1.02*	1.95*	4.238	6.706	10.458	13.462	14.334	14.664	1.254*
		12.2	1.12*	2.05*	4.338	6.806	10.458	13.462	14.534	14.864	1.354*
		12.3	1.02*	2.05*	4.438	6.906	10.458	13.462	14.434	14.764	1.454*
		12.4	0.92*	1.95*	4.338	6.906	10.458	13.462	14.434	14.664	1.354*
		12.5	1.02*	1.95*	4.338	6.906	10.558	13.462	14.434	14.764	1.354*
		12.6	1.02*	2.05*	4.338	6.906	10.658	13.462	14.434	14.764	1.454*
		12.7	1.02*	2.05*	4.438	7.006	10.558	13.362	14.434	14.664	1.454*
		12.8	1.02*	1.85*	4.338	6.906	10.658	13.462	14.434	14.764	1.454*
		12.9	0.92*	1.95*	4.338	6.906	10.758	13.462	14.534	14.664	1.354*
		13	1.12*	2.05*	4.438	7.106	10.658	13.262	14.534	14.764	1.354*
		13.1	1.12*	2.05*	4.438	7.206	10.658	13.262	14.534	14.764	1.354*
		13.2	1.12*	2.15*	4.538	7.206	10.758	13.362	14.534	14.764	1.354*
		13.3	1.12*	2.15*	4.438	7.206	10.758	13.362	14.734	14.964	1.354*
		13.4	1.12*	2.15*	4.538	7.206	10.758	13.362	14.534	14.864	1.354*
		13.5	1.12*	2.15*	4.438	7.206	10.658	13.362	14.534	14.864	1.454*
		13.6	1.12*	2.15*	4.438	7.206	10.858	13.562	14.534	14.764	1.554*
		13.7	1.02*	2.15*	4.538	7.306	10.958	13.462	14.634	14.764	1.454*
		13.8	1.02*	2.15*	4.538	7.306	10.958	13.462	14.634	14.764	1.454*
		13.9	1.12*	2.25*	4.638	7.406	10.858	13.462	14.634	14.764	1.454*
		14	1.12*	2.25*	4.738	7.506	10.958	13.462	14.634	14.864	1.354*
		14.1	1.12*	2.25*	4.838	7.606	10.858	13.462	14.734	14.864	1.454*
		14.2	1.12*	2.35*	4.738	7.406	10.958	13.462	14.734	14.864	1.454*
		14.3	1.22*	2.35*	4.838	7.506	11.058	13.462	14.634	14.764	1.454*
		14.4	1.22*	2.45*	4.838	7.506	11.058	13.462	14.634	14.764	1.454*
		14.5	1.22*	2.45*	4.838	7.506	11.158	13.462	14.634	14.764	1.454*
		14.6	1.22*	2.45*	4.838	7.606	11.258	13.562	14.534	14.664	1.454*
		14.7	1.32*	2.45*	4.938	7.606	11.258	13.562	14.534	14.664	1.454*
		14.8	1.22*	2.45*	4.838	7.506	11.158	13.462	14.634	14.664	1.554*
		14.9	1.12*	2.35*	4.838	7.606	11.158	13.562	14.634	14.764	1.454*
		15	1.12*	2.45*	4.938	7.606	11.158	13.562	14.634	14.764	1.454*
		15.1	1.12*	2.45*	4.838	7.606	11.258	13.562	14.534	14.664	1.454*
		15.2	1.22*	2.45*	4.838	7.606	11.258	13.562	14.634	14.664	1.554*
		15.3	1.22*	2.55*	4.938	7.706	11.358	13.662	14.634	14.664	1.554*
		15.4	1.22*	2.55*	4.938	7.706	11.258	13.562	14.634	14.664	1.554*
		15.5	1.22*	2.55*	4.938	7.706	11.358	13.562	14.634	14.664	1.454*
		15.6	1.22*	2.55*	4.838	7.706	11.358	13.462	14.634	14.764	1.454*
		15.7	1.32*	2.65*	4.938	7.706	11.458	13.562	14.534	14.764	1.454*
		15.8	1.22*	2.55*	4.938	7.806	11.358	13.562	14.634	14.764	1.554*
		15.9	1.22*	2.65*	5.038	7.806	11.358	13.562	14.634	14.764	1.554*
		16	1.22*	2.65*	4.938	7.806	11.458	13.562	14.534	14.664	1.554*
		16.1	1.32*	2.55*	4.938	7.806	11.458	13.662	14.534	14.664	1.554*
		16.2	1.32*	2.55*	5.038	7.906	11.458	13.562	14.534	14.664	1.654*
		16.3	1.32*	2.65*	5.038	7.806	11.458	13.562	14.534	14.664	1.554*
		16.4	1.42*	2.65*	5.138	7.906	11.458	13.662	14.534	14.764	1.554*
		16.5	1.42*	2.65*	5.238	8.006	11.558	13.662	14.534	14.764	1.454*
		16.6	1.32*	2.65*	5.338	8.106	11.558	13.662	14.634	14.764	1.554*
		16.7	1.32*	2.65*	5.338	8.106	11.658	13.762	14.634	14.764	1.554*
		16.8	1.42*	2.65*	5.238	8.106	11.558	13.662	14.634	14.764	1.454*
		16.9	1.42*	2.75*	5.338	8.106	11.658	13.662	14.534	14.664	1.554*
		17	1.32*	2.75*	5.338	8.206	11.658	13.662	14.534	14.764	1.554*
		17.1	1.22*	2.65*	5.438	8.206	11.658	13.762	14.534	14.664	1.554*
		17.2	1.32*	2.65*	5.438	8.206	11.758	13.762	14.534	14.664	1.554*
		17.3	1.42*	2.85*	5.438	8.306	11.758	13.762	14.534	14.664	1.554*
		17.4	1.42*	2.85*	5.438	8.306	11.758	13.762	14.534	14.664	1.654*
		17.5	1.42*	2.85*	5.438	8.206	11.758	13.762	14.534	14.664	1.554*
		17.6	1.52*	2.95*	5.538	8.306	11.758	13.762	14.634	14.764	1.554*
		17.7	1.52*	2.95*	5.438	8.306	11.858	13.762	14.534	14.664	1.654*
		17.8	1.42*	2.85*	5.538	8.406	11.758	13.862	14.534	14.664	1.654*
		17.9	1.42*	2.85*	5.438	8.406	11.758	13.862	14.534	14.664	1.654*
		18	1.42*	2.95*	5.438	8.406	11.858	13.862	14.534	14.764	1.654*
		18.1	1.52*	2.95*	5.438	8.406	11.858	13.862	14.534	14.764	1.654*
		18.2	1.52*	2.95*	5.538	8.506	11.958	13.962	14.534	14.764	1.654*
		18.3	1.52*	2.95*	5.538	8.506	11.858	13.862	14.634	14.764	1.654*
		18.4	1.52*	2.95*	5.638	8.606	11.958	13.862	14.534	14.764	1.754*
		18.5	1.52*	2.95*	5.638	8.606	11.958	13.862	14.434	14.764	1.754*
		18.6	1.52*	2.95*	5.638	8.706	11.958	13.862	14.434	14.764	1.654*
		18.7	1.52*	2.95*	5.638	8.606	11.958	13.862	14.434	14.764	1.554*
		18.8	1.42*	2.85*	5.638	8.706	12.058	13.862	14.434	14.764	1.654*
		18.9	1.42*	2.75*	5.638	8.606	12.058	13.862	14.534	14.764	1.654*
		19	1.42*	2.75*	5.738	8.706	12.058	13.762	14.534	14.764	1.654*
		19.1	1.52*	2.85*	5.738	8.706	12.058	13.862	14.534	14.764	1.654*
		19.2	1.52*	2.85*	5.838	8.706	12.058	13.862	14.434	14.664	1.754*
		19.3	1.52*	2.85*	5.738	8.606	12.158	13.862	14.434	14.664	1.754*
		19.4	1.42*	2.85*	5.738	8.706	12.158	13.862	14.434	14.664	1.754*
		19.5	1.52*	2.85*	5.738	8.706	12.258	13.862	14.434	14.764	1.654*
		19.6	1.52*	2.85*	5.838	8.806	12.258	13.962	14.534	14.764	1.754*
		19.7	1.52*	2.85*	5.838	8.806	12.358	13.962	14.634	14.764	1.754*
		19.8	1.52*	2.95*	5.838	8.806	12.258	13.862	14.534	14.664	1.754*
		19.9	1.42*	2.85*	5.838	8.806	12.258	13.862	14.534	14.664	1.754*
		20	1.52*	2.95*	5.838	8.806	12.358	13.862	14.534	14.664	1.754*
		20.1	1.52*	2.95*	5.838	8.806	12.358	13.962	14.534	14.664	1.754*
		20.2	1.52*	2.95*	5.938	8.806	12.358	13.962	14.634	14.764	1.654*
		20.3	1.52*	2.95*	5.938	8.906	12.558	14.062	14.634	14.764	1.754*
		20.4	1.62*	3.05*	5.938	8.906	12.558	14.062	14.534	14.664	1.754*
		20.5	1.62*	3.05*	6.038	8.906	12.458	13.962	14.534	14.664	1.754*
		20.6	1.62*	3.05*	5.838	8.706	12.458	14.062	14.534	14.664	1.754*
		20.7	1.62*	3.05*	5.838	8.806	12.558	14.062	14.534	14.664	1.754*
		20.8	1.62*	3.05*	5.938	8.806	12.558	14.062	14.534	14.664	1.754*
		20.9	1.62*	3.15*	5.938	8.806	12.558	14.062	14.434	14.564	1.754*
		21	1.62*	3.15*	5.938	8.806	12.558	14.162	14.434	14.564	1.754*
		21.1	1.72*	3.15*	5.938	8.806	12.558	14.062	14.534	14.664	1.754*
		21.2	1.72*	3.15*	5.938	8.906	12.558	14.062	14.534	14.664	1.754*
		21.3	1.72*	3.25*	6.038	8.906	12.558	14.062	14.534	14.664	1.954*
		21.4	1.72*	3.25*	6.038	8.906	12.558	14.062	14.534	14.664	1.754*
		21.5	1.72*	3.25*	5.938	8.906	12.658	14.162	14.434	14.564	1.754*
		21.6	1.82*	3.35*	6.038	8.906	12.658	14.162	14.534	14.564	1.754*
		21.7	1.82*	3.35*	6.038	8.906	12.658	14.162	14.534	14.664	1.854*
		21.8	1.82*	3.35*	6.138	9.006	12.558	14.062	14.534	14.664	1.854*
		21.9	1.82*	3.45*	6.038	8.906	12.658	14.162	14.534	14.664	1.754*
		22	1.82*	3.45*	6.138	9.006	12.658	14.162	14.534	14.664	1.654*
		22.1	1.82*	3.45*	6.138	9.006	12.658	14.162	14.434	14.564	1.654*
		22.2	1.92*	3.45*	6.138	9.006	12.558	14.062	14.534	14.564	1.854*
		22.3	1.92*	3.55*	6.238	9.106	12.658	14.162	14.534	14.564	1.754*
		22.4	1.82*	3.45*	6.138	9.006	12.658	14.162	14.534	14.664	1.754*
		22.5	1.92*	3.45*	6.138	9.106	12.658	14.162	14.534	14.664	1.754*
		22.6	1.92*	3.55*	6.238	9.106	12.658	14.162	14.534	14.664	1.754*
		22.7	1.92*	3.55*	6.238	9.206	12.758	14.262	14.434	14.564	1.754*
		22.8	1.92*	3.55*	6.338	9.206	12.758	14.262	14.434	14.564	1.754*
		22.9	2.02*	3.45*	6.338	9.206	12.758	14.262	14.434	14.564	1.754*
		23	2.02*	3.55*	6.238	9.206	12.758	14.162	14.534	14.564	1.754*
		23.1	2.02*	3.55*	6.238	9.106	12.758	14.162	14.634	14.664	1.754*
		23.2	2.12*	3.55*	6.338	9.106	12.758	14.262	14.634	14.664	1.754*
		23.3	2.12*	3.55*	6.338	9.206	12.758	14.262	14.634	14.664	1.754*
		23.4	2.02*	3.55*	6.338	9.206	12.858	14.262	14.534	14.564	1.754*
		23.5	2.02*	3.55*	6.238	9.106	12.858	14.262	14.534	14.564	1.754*
		23.6	1.92*	3.45*	6.338	9.206	12.758	14.162	14.634	14.564	1.854*
		23.7	1.92*	3.45*	6.338	9.206	12.858	14.262	14.634	14.564	1.854*
		23.8	1.92*	3.55*	6.338	9.206	12.958	14.262	14.634	14.664	1.954*
		23.9	1.92*	3.55*	6.338	9.306	12.958	14.262	14.734	14.764	1.854*
		24	2.02*	3.55*	6.438	9.306	12.958	14.262	14.634	14.664	1.954*
		24.1	2.02*	3.55*	6.438	9.306	12.958	14.262	14.634	14.664	1.954*
		24.2	2.02*	3.65*	6.438	9.406	12.958	14.362	14.634	14.664	1.954*
		24.3	2.02*	3.65*	6.438	9.306	12.958	14.262	14.634	14.664	1.954*
		24.4	2.12*	3.65*	6.438	9.306	12.858	14.262	14.634	14.664	2.054*
		24.5	2.12*	3.65*	6.338	9.306	12.858	14.262	14.734	14.664	2.054*
		24.6	2.02*	3.65*	6.338	9.406	12.858	14.262	14.734	14.664	2.054*
		24.7	2.02*	3.65*	6.338	9.406	12.858	14.262	14.734	14.664	1.954*
		24.8	2.02*	3.65*	6.438	9.506	12.958	14.262	14.634	14.664	2.054*
		24.9	2.12*	3.65*	6.438	9.506	12.958	14.262	14.634	14.664	2.054*
		25	2.12*	3.75*	6.438	9.506	12.858	14.262	14.734	14.664	2.054*
		25.1	2.12*	3.75*	6.338	9.506	12.858	14.262	14.734	14.664	2.054*
		25.2	2.02*	3.65*	6.338	9.506	12.858	14.262	14.734	14.664	2.054*
		25.3	2.02*	3.75*	6.438	9.506	12.958	14.262	14.634	14.564	2.054*
		25.4	2.02*	3.75*	6.438	9.606	12.858	14.162	14.634	14.564	2.054*
		25.5	2.12*	3.75*	6.438	9.606	12.858	14.162	14.634	14.564	2.054*
		25.6	2.12*	3.75*	6.538	9.706	12.858	14.162	14.634	14.664	2.054*
		25.7	2.02*	3.75*	6.438	9.606	12.958	14.262	14.634	14.764	2.054*
		25.8	2.02*	3.75*	6.438	9.606	12.958	14.262	14.634	14.664	2.154*
		25.9	2.02*	3.75*	6.538	9.606	12.958	14.262	14.634	14.664	2.154*
		26	2.12*	3.75*	6.538	9.706	12.858	14.162	14.634	14.664	2.154*
		26.1	2.12*	3.85*	6.638	9.706	12.958	14.162	14.634	14.664	2.154*
		26.2	2.02*	3.85*	6.638	9.806	12.958	14.162	14.634	14.664	2.154*
		26.3	2.02*	3.85*	6.638	9.806	12.958	14.162	14.634	14.664	2.254*
		26.4	1.92*	3.75*	6.738	9.806	12.858	14.062	14.534	14.564	2.254*
		26.5	1.92*	3.85*	6.738	9.906	12.958	14.162	14.534	14.564	2.154*
		26.6	1.92*	3.85*	6.638	9.806	12.958	14.162	14.534	14.564	2.054*
		26.7	2.02*	3.85*	6.638	9.806	12.958	14.162	14.534	14.564	2.054*
		26.8	2.02*	3.85*	6.638	9.906	12.958	14.162	14.634	14.564	2.054*
		26.9	2.02*	3.85*	6.738	9.906	12.958	14.262	14.634	14.564	2.154*
		27	2.02*	3.85*	6.738	9.906	12.858	14.162	14.634	14.564	2.154*
		27.1	1.92*	3.85*	6.738	9.906	12.958	14.162	14.434	14.464	2.254*
		27.2	1.92*	3.85*	6.838	10.006	12.958	14.162	14.434	14.564	2.254*
		27.3	1.92*	3.85*	6.838	10.006	12.958	14.162	14.434	14.564	2.154*
		27.4	1.92*	3.95*	6.738	9.806	13.058	14.262	14.434	14.564	2.154*
		27.5	1.92*	3.95*	6.738	9.906	13.058	14.262	14.434	14.664	2.254*
		27.6	2.02*	3.95*	6.838	10.006	12.958	14.162	14.534	14.664	2.154*
		27.7	1.92*	3.85*	6.838	10.006	12.958	14.162	14.534	14.664	2.254*
		27.8	1.82*	3.75*	6.838	10.006	12.958	14.262	14.534	14.664	2.254*
		27.9	1.82*	3.85*	6.838	10.106	12.958	14.262	14.534	14.664	2.154*
		28	2.02*	3.85*	6.938	10.106	12.958	14.262	14.534	14.764	2.154*
		28.1	1.92*	3.75*	6.838	10.006	12.958	14.262	14.634	14.764	2.154*
		28.2	1.92*	3.75*	6.838	10.006	13.058	14.262	14.534	14.664	2.054*
		28.3	1.92*	3.75*	6.938	10.006	12.958	14.162	14.534	14.764	2.054*
		28.4	1.92*	3.85*	6.938	10.106	12.958	14.262	14.634	14.764	1.954*
		28.5	1.82*	3.85*	6.938	10.106	13.058	14.262	14.534	14.664	2.054*
		28.6	1.82*	3.85*	6.838	10.006	13.058	14.262	14.734	14.764	2.054*
		28.7	1.92*	3.95*	7.038	10.006	13.058	14.262	14.734	14.764	2.154*
		28.8	1.92*	3.95*	7.038	10.106	13.058	14.162	14.734	14.764	2.154*
		28.9	1.92*	3.95*	7.038	10.106	13.158	14.262	14.534	14.664	2.154*
		29	2.12*	3.85*	6.938	9.906	13.058	14.062	14.634	14.764	2.154*
		29.1	2.02*	3.95*	7.138	10.106	13.158	14.162	14.734	14.764	2.154*
		29.2	2.02*	3.85*	7.238	10.106	13.158	14.062	14.834	14.764	2.154*
		29.3	2.02*	3.75*	7.338	10.206	13.258	14.062	14.934	14.864	2.154*
		29.4	1.72*	3.75*	6.938	9.906	13.058	14.162	15.034	14.964	1.554*
		29.5	1.62*	3.25*	6.638	9.406	12.958	14.562	14.534	14.764	1.454*
		29.6	1.72*	3.25*	6.338	9.306	12.858	14.562	14.434	14.564	0.654*
		29.7	1.22*	2.35*	5.438	8.506	12.358	14.462	14.634	14.864	-0.046*
		29.8	2.72*	3.95*	7.238	10.706	12.458	14.562	14.634	14.764	2.454*
		29.9	2.42*	4.15*	7.438	10.206	12.958	13.862	14.834	15.164	2.454*
		30	1.72*	-0.45*	2.538	4.206	11.158	10.762	11.934	9.664	-4.146*
		30.1	3.32*	-2.15*	0.738	4.006	12.358	14.962	15.534	16.164	-4.946*
		30.2	2.92*	-0.55*	2.238	5.706	13.558	15.162	15.434	16.964	-2.246*
		30.3	3.32*	1.15*	4.138	7.406	12.758	14.262	14.334	14.864	-0.046*
		30.4	3.52*	2.45*	5.338	8.606	13.058	14.262	14.434	14.664	0.954*
		30.5	3.12*	2.65*	5.938	8.806	12.758	13.762	14.534	14.564	0.954*
		30.6	2.72*	3.35*	6.438	9.406	12.758	13.662	14.034	14.164	1.154*
		30.7	2.62*	3.55*	6.238	9.406	12.758	13.862	14.234	14.164	1.654*
		30.8	2.42*	3.55*	6.838	9.706	13.258	13.762	14.534	14.464	1.554*
		30.9	2.32*	3.25*	6.638	9.606	12.758	13.862	14.234	14.264	1.854*
		31	2.32*	3.35*	6.638	9.406	12.858	13.662	14.334	14.364	1.854*
		31.1	2.42*	3.45*	6.838	9.606	12.958	13.762	14.334	14.264	1.754*
		31.2	2.42*	3.65*	6.938	10.006	12.958	13.762	14.534	14.364	1.854*
		31.3	2.32*	3.55*	6.838	9.906	12.658	13.862	14.534	14.364	1.754*
		31.4	2.22*	3.55*	6.738	9.606	12.858	13.862	14.234	14.264	1.954*
		31.5	2.42*	3.75*	6.938	9.606	12.858	13.762	14.134	14.364	1.854*
		31.6	2.42*	3.85*	6.938	9.506	13.058	13.862	14.034	14.364	1.954*
		31.7	2.32*	3.75*	6.938	9.606	13.058	13.762	14.134	14.364	2.254*
		31.8	2.32*	3.65*	6.738	9.506	12.858	13.762	14.034	14.264	1.854*
		31.9	2.22*	3.75*	6.938	9.606	12.758	13.762	14.134	14.264	1.954*
		32	2.22*	3.75*	6.938	9.806	12.758	13.862	14.034	14.264	1.754*
		32.1	2.22*	3.85*	6.838	9.606	12.758	13.762	14.034	14.164	1.854*
		32.2	2.42*	3.85*	6.838	9.706	12.558	13.662	14.034	14.164	1.854*
		32.3	2.42*	3.85*	6.938	9.806	12.558	13.662	14.034	14.164	1.854*
		32.4	2.32*	3.85*	6.838	9.806	12.558	13.662	14.034	14.264	1.954*
		32.5	2.32*	3.85*	6.838	9.806	12.658	13.762	14.034	14.164	1.954*
		32.6	2.22*	3.75*	6.738	9.706	12.658	13.762	14.034	13.964	2.054*
		32.7	2.12*	3.75*	6.838	9.706	12.758	13.662	13.934	14.064	2.054*
		32.8	2.12*	3.75*	6.838	9.606	12.858	13.762	13.834	13.964	1.954*
		32.9	2.12*	3.85*	6.838	9.606	12.858	13.862	13.634	13.864	2.054*
		33	2.02*	3.65*	6.738	9.706	12.658	13.762	13.634	13.864	2.054*
		33.1	2.12*	3.85*	6.838	9.706	12.758	13.762	13.734	13.964	2.054*
		33.2	2.12*	3.75*	6.838	9.706	12.758	13.762	13.734	13.864	2.154*
		33.3	2.22*	3.85*	6.738	9.606	12.758	13.662	13.534	13.764	2.154*
		33.4	2.32*	3.95*	6.838	9.706	12.858	13.662	13.734	13.864	2.054*
		33.5	2.12*	3.85*	6.838	9.706	12.658	13.662	13.634	13.864	2.154*
		33.6	2.12*	3.75*	6.738	9.806	12.558	13.662	13.634	13.764	2.154*
		33.7	2.02*	3.75*	6.738	9.806	12.558	13.562	13.634	13.764	2.154*
		33.8	2.12*	3.85*	6.838	9.706	12.558	13.762	13.734	13.864	2.154*
		33.9	2.12*	3.85*	6.838	9.806	12.658	13.762	13.734	13.864	2.154*
		34	2.12*	3.75*	6.738	9.806	12.558	13.662	13.534	13.664	2.054*
		34.1	2.12*	3.75*	6.738	9.906	12.558	13.662	13.534	13.664	2.054*
		34.2	2.12*	3.75*	6.738	9.906	12.558	13.662	13.534	13.664	2.054*
		34.3	2.12*	3.75*	6.738	9.806	12.558	13.662	13.534	13.664	2.054*
		34.4	2.22*	3.85*	6.738	9.806	12.658	13.662	13.534	13.564	2.054*
		34.5	2.12*	3.75*	6.738	9.806	12.558	13.562	13.534	13.664	2.054*
		34.6	2.12*	3.75*	6.838	9.806	12.558	13.662	13.534	13.664	2.154*
		34.7	2.12*	3.75*	6.738	9.706	12.358	13.562	13.534	13.664	2.154*
		34.8	2.12*	3.75*	6.638	9.606	12.358	13.562	13.534	13.664	2.154*
		34.9	2.12*	3.75*	6.738	9.606	12.258	13.462	13.434	13.464	2.154*
		35	2.12*	3.75*	6.738	9.606	12.258	13.462	13.334	13.464	2.154*
		35.1	2.12*	3.75*	6.738	9.606	12.258	13.462	13.534	13.464	2.154*
		35.2	2.02*	3.85*	6.738	9.606	12.258	13.562	13.434	13.564	2.154*
		35.3	2.02*	3.75*	6.738	9.606	12.258	13.562	13.434	13.564	1.954*
		35.4	2.22*	3.85*	6.638	9.506	12.158	13.462	13.434	13.564	2.054*
		35.5	2.12*	3.85*	6.738	9.506	12.158	13.462	13.534	13.564	2.054*
		35.6	2.12*	3.85*	6.738	9.506	12.058	13.462	13.434	13.564	2.154*
		35.7	2.12*	3.75*	6.738	9.506	12.058	13.462	13.334	13.564	2.154*
		35.8	2.12*	3.85*	6.838	9.506	12.058	13.262	13.334	13.464	1.954*
		35.9	2.12*	3.85*	6.738	9.506	11.958	13.262	13.434	13.564	1.954*
		36	2.22*	3.85*	6.738	9.506	12.058	13.262	13.334	13.664	1.954*
		36.1	2.12*	3.75*	6.638	9.406	12.058	13.162	13.334	13.564	1.954*
		36.2	2.12*	3.75*	6.638	9.506	12.058	13.262	13.234	13.464	1.954*
		36.3	2.12*	3.85*	6.638	9.506	12.058	13.262	13.234	13.464	1.954*
		36.4	2.12*	3.85*	6.538	9.406	12.058	13.162	13.234	13.464	2.054*
		36.5	2.02*	3.65*	6.538	9.406	11.958	13.162	13.134	13.464	2.054*
		36.6	2.02*	3.65*	6.538	9.406	12.058	13.162	13.034	13.364	1.954*
		36.7	2.22*	3.85*	6.438	9.306	11.958	13.162	13.234	13.464	2.154*
		36.8	2.22*	3.85*	6.538	9.406	12.058	13.162	13.134	13.364	2.154*
		36.9	2.12*	3.75*	6.538	9.406	12.058	13.062	13.034	13.164	2.154*
		37	2.22*	3.85*	6.438	9.306	12.058	13.162	12.934	13.164	2.154*
		37.1	2.12*	3.85*	6.638	9.406	12.058	13.162	13.134	13.364	2.354*
		37.2	2.12*	3.75*	6.538	9.406	12.058	13.162	13.034	13.164	2.154*
		37.3	2.22*	3.95*	6.538	9.406	12.058	13.162	13.134	13.364	2.354*
		37.4	2.22*	3.85*	6.538	9.406	12.158	13.162	13.034	13.164	2.254*
		37.5	2.12*	3.75*	6.438	9.306	12.158	13.162	13.034	13.264	2.254*
		37.6	2.32*	3.75*	6.538	9.406	12.158	13.162	13.034	13.164	2.254*
		37.7	2.22*	3.75*	6.538	9.306	12.058	13.062	12.934	13.164	2.254*
		37.8	2.22*	3.85*	6.438	9.306	12.058	13.162	13.034	13.164	2.254*
		37.9	2.12*	3.65*	6.538	9.406	11.958	13.062	12.934	12.964	2.254*
		38	2.12*	3.65*	6.338	9.206	11.958	12.962	12.834	13.064	2.254*
		38.1	2.12*	3.65*	6.438	9.306	12.058	13.062	12.934	13.064	2.254*
		38.2	2.22*	3.65*	6.538	9.306	12.158	13.162	12.934	12.964	2.254*
		38.3	2.12*	3.75*	6.438	9.306	12.058	13.062	12.934	12.964	2.254*
		38.4	2.12*	3.65*	6.538	9.306	11.858	12.962	12.734	12.864	2.254*
		38.5	2.12*	3.55*	6.338	9.206	12.058	12.962	12.834	12.964	2.254*
		38.6	2.12*	3.65*	6.538	9.306	11.858	12.862	12.734	12.764	2.254*
		38.7	2.02*	3.65*	6.338	9.306	11.958	12.862	12.734	12.764	2.254*
		38.8	2.12*	3.65*	6.438	9.206	11.858	12.862	12.534	12.664	2.154*
		38.9	1.92*	3.55*	6.338	9.206	11.858	12.862	12.734	12.764	2.054*
		39	2.12*	3.65*	6.338	9.306	11.758	12.762	12.534	12.664	2.154*
		39.1	1.92*	3.65*	6.338	9.206	11.758	12.762	12.634	12.664	2.054*
		39.2	2.12*	3.75*	6.338	9.306	11.658	12.662	12.534	12.664	2.054*
		39.3	2.02*	3.55*	6.338	9.306	11.658	12.662	12.534	12.564	2.054*
		39.4	2.02*	3.55*	6.238	9.206	11.658	12.662	12.534	12.664	1.954*
		39.5	2.02*	3.55*	6.338	9.306	11.458	12.562	12.434	12.664	2.054*
		39.6	1.92*	3.55*	6.338	9.206	11.658	12.562	12.534	12.564	1.854*
		39.7	2.02*	3.65*	6.338	9.306	11.558	12.662	12.534	12.564	2.054*
		39.8	1.92*	3.65*	6.238	9.106	11.558	12.562	12.534	12.564	1.854*
		39.9	2.02*	3.55*	6.338	9.306	11.658	12.662	12.434	12.564	2.054*
		40	1.92*	3.55*	6.238	9.206	11.458	12.562	12.434	12.464	1.954*
		40.1	2.02*	3.65*	6.238	9.106	11.558	12.562	12.434	12.464	2.054*
		40.2	1.92*	3.55*	6.338	9.206	11.558	12.662	12.234	12.464	1.954*
		40.3	2.02*	3.65*	6.338	9.206	11.458	12.462	12.334	12.364	2.054*
		40.4	2.02*	3.65*	6.338	9.206	11.558	12.662	12.234	12.464	1.954*
		40.5	1.92*	3.55*	6.338	9.206	11.458	12.562	12.334	12.364	1.954*
		40.6	2.02*	3.55*	6.238	9.006	11.458	12.662	12.434	12.564	1.954*
		40.7	1.92*	3.55*	6.238	9.106	11.358	12.462	12.234	12.464	2.054*
		40.8	2.02*	3.55*	6.338	9.106	11.458	12.562	12.334	12.364	1.954*
		40.9	2.02*	3.65*	6.138	8.906	11.358	12.562	12.234	12.464	2.054*
		41	2.02*	3.55*	6.338	9.106	11.458	12.562	12.334	12.464	1.954*
		41.1	1.92*	3.55*	6.138	9.006	11.358	12.562	12.234	12.464	2.054*
		41.2	2.02*	3.65*	6.138	8.906	11.258	12.362	12.334	12.564	1.954*
		41.3	2.02*	3.55*	6.338	9.106	11.358	12.462	12.334	12.364	1.854*
		41.4	1.92*	3.45*	6.138	8.906	11.258	12.462	12.234	12.364	2.054*
		41.5	2.12*	3.65*	6.238	8.906	11.258	12.462	12.134	12.464	1.954*
		41.6	2.02*	3.55*	6.238	9.006	11.358	12.562	12.234	12.364	1.954*
		41.7	1.92*	3.45*	6.238	9.006	11.158	12.362	12.334	12.464	2.054*
		41.8	2.02*	3.55*	6.238	8.906	11.258	12.462	12.134	12.264	2.054*
		41.9	1.92*	3.45*	6.238	9.006	11.158	12.362	12.134	12.364	1.954*
		42	2.02*	3.55*	6.338	9.006	11.158	12.262	12.134	12.264	2.054*
		42.1	1.92*	3.45*	6.338	9.006	11.158	12.462	12.034	12.264	1.954*
		42.2	1.82*	3.45*	6.338	9.006	11.158	12.262	12.034	12.264	1.954*
		42.3	2.02*	3.55*	6.238	8.806	11.158	12.362	12.034	12.264	2.054*
		42.4	1.92*	3.45*	6.238	8.806	11.058	12.262	12.034	12.264	2.054*
		42.5	1.92*	3.45*	6.238	9.006	11.158	12.162	11.934	12.164	1.954*
		42.6	1.92*	3.55*	6.238	8.806	11.158	12.262	12.034	12.264	1.954*
		42.7	1.92*	3.45*	6.338	8.906	11.058	12.162	12.034	12.164	2.054*
		42.8	1.82*	3.45*	6.338	8.906	11.158	12.162	11.934	12.164	1.854*
		42.9	1.82*	3.45*	6.238	8.806	11.158	12.062	12.034	12.164	1.954*
		43	1.92*	3.35*	6.238	8.906	11.058	12.062	11.934	12.164	2.054*
		43.1	1.82*	3.35*	6.338	8.906	11.158	12.062	11.934	12.064	1.954*
		43.2	1.92*	3.45*	6.238	8.806	11.158	12.062	11.934	12.064	1.954*
		43.3	1.92*	3.35*	6.338	8.906	11.158	12.062	12.034	12.264	2.054*
		43.4	1.82*	3.35*	6.338	8.906	11.158	12.062	11.934	12.064	1.854*
		43.5	1.92*	3.35*	6.238	8.806	11.258	11.962	11.934	12.064	1.954*
		43.6	2.02*	3.45*	6.238	8.906	11.158	12.062	11.834	12.064	2.054*
		43.7	1.82*	3.35*	6.238	8.806	11.158	11.962	11.934	12.064	2.054*
		43.8	1.92*	3.45*	6.138	8.806	11.158	11.862	11.834	12.064	1.954*
		43.9	1.92*	3.35*	6.138	8.806	11.158	11.962	11.934	12.164	1.954*
		44	1.92*	3.25*	6.138	8.906	11.158	12.062	11.934	12.064	1.954*
		44.1	2.02*	3.45*	6.138	8.806	11.158	11.862	11.934	12.064	1.954*
		44.2	1.92*	3.25*	6.138	8.906	11.058	11.862	11.834	12.064	1.954*
		44.3	1.92*	3.25*	6.038	8.706	11.158	12.062	11.834	11.964	1.854*
		44.4	1.82*	3.25*	6.138	8.806	11.258	12.062	11.934	12.064	1.954*
		44.5	1.82*	3.25*	6.138	8.806	11.058	11.862	11.834	12.064	1.854*
		44.6	1.92*	3.25*	6.038	8.806	11.058	11.862	11.834	11.964	1.854*
		44.7	1.82*	3.15*	6.038	8.806	11.158	12.062	11.934	11.964	1.854*
		44.8	1.82*	3.25*	6.038	8.806	11.058	11.862	11.834	11.964	1.854*
		44.9	1.92*	3.25*	5.938	8.706	11.058	11.862	11.734	11.964	1.754*
		45	1.82*	3.15*	6.038	8.806	10.958	11.962	11.734	11.964	1.854*
		45.1	1.82*	3.15*	6.038	8.706	11.158	11.962	11.834	11.964	1.754*
		45.2	1.82*	3.25*	6.038	8.706	11.058	11.862	11.734	11.964	1.754*
		45.3	1.82*	3.25*	5.938	8.806	10.958	11.862	11.734	11.864	1.754*
		45.4	1.82*	3.15*	5.938	8.706	10.958	11.862	11.834	11.964	1.854*
		45.5	1.82*	3.25*	5.938	8.606	10.858	11.862	11.734	11.964	1.754*
		45.6	1.82*	3.35*	5.938	8.706	10.758	11.762	11.734	11.864	1.754*
		45.7	1.82*	3.25*	6.038	8.706	10.958	11.762	11.834	11.864	1.754*
		45.8	1.82*	3.15*	5.838	8.606	10.858	11.762	11.734	11.864	1.854*
		45.9	1.82*	3.35*	5.838	8.706	10.858	11.762	11.734	11.864	1.754*
		46	1.82*	3.35*	5.938	8.606	10.858	11.762	11.834	11.864	1.754*
		46.1	1.82*	3.35*	6.038	8.706	10.758	11.762	11.734	11.764	1.754*
		46.2	1.82*	3.25*	5.838	8.706	10.858	11.762	11.734	11.764	1.654*
		46.3	1.72*	3.25*	5.838	8.606	10.758	11.662	11.734	11.864	1.754*
		46.4	1.82*	3.35*	5.838	8.606	10.758	11.762	11.734	11.764	1.754*
		46.5	1.82*	3.35*	5.938	8.606	10.658	11.562	11.734	11.764	1.654*
		46.6	1.72*	3.25*	5.938	8.506	10.758	11.662	11.734	11.864	1.654*
		46.7	1.72*	3.25*	5.938	8.606	10.658	11.662	11.634	11.764	1.554*
		46.8	1.82*	3.35*	5.838	8.606	10.658	11.562	11.734	11.764	1.654*
		46.9	1.92*	3.35*	5.938	8.506	10.658	11.662	11.834	11.864	1.654*
		47	1.72*	3.25*	5.938	8.506	10.658	11.562	11.634	11.664	1.554*
		47.1	1.72*	3.25*	5.938	8.506	10.658	11.562	11.734	11.764	1.554*
		47.2	1.82*	3.35*	5.938	8.506	10.758	11.762	11.734	11.664	1.654*
		47.3	1.82*	3.35*	5.838	8.406	10.758	11.562	11.734	11.764	1.754*
		47.4	1.82*	3.25*	5.938	8.506	10.658	11.562	11.734	11.764	1.554*
		47.5	1.82*	3.25*	5.938	8.406	10.658	11.562	11.834	11.864	1.654*
		47.6	1.82*	3.25*	5.938	8.506	10.558	11.462	11.734	11.764	1.654*
		47.7	1.82*	3.35*	6.038	8.506	10.558	11.562	11.734	11.764	1.554*
		47.8	1.82*	3.25*	5.838	8.306	10.558	11.462	11.734	11.764	1.554*
		47.9	1.72*	3.25*	5.838	8.306	10.658	11.462	11.934	11.764	1.654*
		48	1.72*	3.25*	5.938	8.406	10.558	11.562	11.734	11.664	1.654*
		48.1	1.72*	3.15*	5.838	8.206	10.558	11.462	11.734	11.664	1.654*
		48.2	1.82*	3.25*	5.838	8.306	10.558	11.462	11.734	11.664	1.754*
		48.3	1.82*	3.25*	5.938	8.306	10.558	11.362	11.734	11.764	1.754*
		48.4	1.72*	3.15*	5.838	8.306	10.558	11.462	11.734	11.664	1.654*
		48.5	1.72*	3.15*	5.838	8.306	10.558	11.462	11.734	11.664	1.554*
		48.6	1.92*	3.25*	5.838	8.206	10.558	11.362	11.634	11.664	1.654*
		48.7	1.82*	3.25*	5.838	8.306	10.458	11.362	11.734	11.764	1.754*
		48.8	1.82*	3.15*	5.838	8.306	10.458	11.362	11.734	11.664	1.754*
		48.9	1.72*	3.15*	5.738	8.206	10.558	11.362	11.534	11.564	1.654*
		49	1.92*	3.35*	5.938	8.206	10.458	11.362	11.534	11.564	1.654*
		49.1	1.92*	3.35*	5.838	8.206	10.458	11.262	11.634	11.664	1.654*
		49.2	1.72*	3.25*	5.838	8.206	10.458	11.262	11.634	11.764	1.754*
		49.3	1.72*	3.15*	5.738	8.206	10.458	11.262	11.634	11.664	1.754*
		49.4	1.72*	3.15*	5.638	8.106	10.458	11.262	11.534	11.664	1.754*
		49.5	1.82*	3.35*	5.638	8.106	10.358	11.262	11.534	11.564	1.654*
		49.6	1.82*	3.25*	5.738	8.106	10.358	11.162	11.534	11.564	1.754*
		49.7	1.82*	3.15*	5.838	8.306	10.258	11.162	11.434	11.464	1.754*
		49.8	1.72*	3.15*	5.738	8.206	10.358	11.162	11.434	11.564	1.754*
		49.9	1.82*	3.25*	5.738	8.206	10.258	11.062	11.434	11.664	1.754*
		50	1.72*	3.25*	5.838	8.206	10.358	11.162	11.334	11.464	1.654*
		50.1	1.82*	3.25*	5.738	8.006	10.358	11.162	11.434	11.464	1.754*
		50.2	1.72*	3.15*	5.838	8.206	10.358	10.962	11.334	11.464	1.754*
		50.3	1.72*	3.15*	5.738	8.206	10.258	11.062	11.334	11.464	1.654*
		50.4	1.72*	3.15*	5.738	8.206	10.358	11.162	11.234	11.464	1.654*
		50.5	1.72*	3.25*	5.738	8.106	10.358	11.162	11.134	11.364	1.854*
		50.6	1.62*	3.25*	5.838	8.106	10.258	11.062	11.234	11.364	1.854*
		50.7	1.72*	3.15*	5.638	8.006	10.158	11.062	11.334	11.364	1.654*
		50.8	1.72*	3.15*	5.738	8.106	10.258	11.062	11.234	11.364	1.654*
		50.9	1.62*	3.15*	5.738	8.106	10.358	11.162	11.134	11.264	1.754*
		51	1.62*	3.25*	5.738	8.106	10.258	11.062	11.134	11.264	1.754*
		51.1	1.62*	3.25*	5.738	8.006	10.258	11.062	11.134	11.264	1.654*
		51.2	1.72*	3.15*	5.738	8.106	10.258	11.062	11.134	11.264	1.654*
		51.3	1.72*	3.15*	5.738	8.106	10.158	10.962	11.134	11.264	1.654*
		51.4	1.72*	3.25*	5.638	8.006	10.258	11.062	11.034	11.164	1.654*
		51.5	1.72*	3.25*	5.838	8.006	10.258	11.062	11.034	11.164	1.654*
		51.6	1.72*	3.25*	5.738	8.006	10.258	11.062	11.134	11.164	1.754*
		51.7	1.72*	3.15*	5.738	8.006	10.158	11.062	11.134	11.164	1.654*
		51.8	1.72*	3.15*	5.738	8.106	10.158	10.862	11.034	11.164	1.554*
		51.9	1.62*	3.05*	5.738	8.106	10.258	10.962	11.034	11.164	1.554*
		52	1.62*	3.05*	5.638	8.006	10.258	11.062	11.034	11.164	1.554*
		52.1	1.62*	3.15*	5.538	7.906	10.258	11.062	10.934	11.064	1.754*
		52.2	1.62*	3.05*	5.638	7.906	10.158	11.062	10.934	10.964	1.754*
		52.3	1.82*	3.15*	5.638	8.106	10.158	10.862	11.034	11.064	1.654*
		52.4	1.82*	3.15*	5.638	8.106	10.158	10.862	11.034	11.064	1.654*
		52.5	1.72*	3.05*	5.638	8.006	10.258	10.962	11.034	11.064	1.654*
		52.6	1.72*	3.15*	5.638	8.006	10.258	10.962	10.834	10.964	1.554*
		52.7	1.72*	3.05*	5.438	7.906	10.158	10.962	10.834	10.964	1.754*
		52.8	1.82*	3.15*	5.538	7.906	10.258	10.962	10.934	10.964	1.754*
		52.9	1.82*	3.15*	5.538	7.906	10.258	10.962	10.934	10.964	1.654*
		53	1.72*	3.05*	5.538	7.906	10.058	10.862	10.834	10.964	1.654*
		53.1	1.72*	2.95*	5.638	8.006	10.158	10.862	10.934	10.964	1.654*
		53.2	1.72*	3.05*	5.538	8.006	10.158	10.862	10.834	10.864	1.654*
		53.3	1.72*	3.05*	5.538	8.006	10.158	10.962	10.834	10.964	1.754*
		53.4	1.72*	3.05*	5.638	7.906	10.158	10.962	10.834	10.964	1.654*
		53.5	1.72*	2.95*	5.538	7.806	10.158	10.862	10.834	10.864	1.654*
		53.6	1.82*	3.05*	5.438	7.806	10.158	10.862	10.934	10.964	1.554*
		53.7	1.72*	2.95*	5.538	8.006	10.158	10.862	10.834	10.864	1.654*
		53.8	1.72*	3.05*	5.538	8.006	9.958	10.762	10.734	10.864	1.754*
		53.9	1.72*	3.05*	5.538	7.906	10.158	10.862	10.734	10.764	1.754*
		54	1.72*	3.05*	5.638	7.906	10.158	10.862	10.734	10.864	1.754*
		54.1	1.82*	2.95*	5.538	7.906	10.058	10.862	10.834	10.864	1.654*
		54.2	1.72*	2.95*	5.438	7.806	10.058	10.862	10.834	10.864	1.554*
		54.3	1.72*	3.05*	5.438	7.906	10.058	10.862	10.734	10.664	1.554*
		54.4	1.72*	3.05*	5.438	7.806	10.058	10.762	10.634	10.664	1.654*
		54.5	1.72*	3.05*	5.438	7.806	9.858	10.662	10.634	10.664	1.654*
		54.6	1.72*	3.05*	5.538	7.906	9.958	10.662	10.634	10.664	1.754*
		54.7	1.82*	2.95*	5.438	7.806	9.958	10.762	10.734	10.764	1.754*
		54.8	1.82*	2.95*	5.438	7.706	9.858	10.662	10.634	10.664	1.754*
		54.9	1.82*	2.95*	5.438	7.706	9.958	10.762	10.634	10.664	1.754*
		55	1.72*	3.05*	5.438	7.706	9.958	10.762	10.634	10.664	1.654*
		55.1	1.72*	3.05*	5.338	7.806	9.858	10.762	10.634	10.564	1.654*
		55.2	1.72*	3.05*	5.538	7.806	9.758	10.662	10.634	10.664	1.654*
		55.3	1.72*	3.05*	5.538	7.806	9.858	10.562	10.534	10.564	1.654*
		55.4	1.82*	3.05*	5.438	7.706	9.858	10.562	10.534	10.564	1.654*
		55.5	1.72*	3.05*	5.438	7.706	9.758	10.662	10.634	10.664	1.654*
		55.6	1.72*	3.05*	5.438	7.706	9.758	10.562	10.634	10.564	1.654*
		55.7	1.72*	3.05*	5.438	7.706	9.858	10.662	10.534	10.564	1.654*
		55.8	1.72*	3.05*	5.438	7.706	9.658	10.562	10.534	10.564	1.654*
		55.9	1.72*	3.05*	5.338	7.606	9.758	10.562	10.434	10.464	1.654*
		56	1.72*	3.05*	5.438	7.706	9.758	10.562	10.434	10.464	1.554*
		56.1	1.72*	3.05*	5.438	7.606	9.758	10.562	10.434	10.464	1.554*
		56.2	1.72*	3.05*	5.338	7.606	9.658	10.562	10.434	10.464	1.754*
		56.3	1.72*	3.05*	5.438	7.606	9.658	10.462	10.534	10.464	1.654*
		56.4	1.72*	3.05*	5.338	7.506	9.658	10.462	10.434	10.364	1.654*
		56.5	1.72*	3.05*	5.338	7.506	9.558	10.362	10.334	10.364	1.654*
		56.6	1.72*	3.05*	5.438	7.606	9.458	10.362	10.334	10.464	1.554*
		56.7	1.62*	2.95*	5.338	7.606	9.558	10.362	10.334	10.364	1.554*
		56.8	1.72*	3.05*	5.338	7.606	9.658	10.462	10.434	10.364	1.754*
		56.9	1.72*	3.15*	5.338	7.506	9.658	10.462	10.334	10.364	1.754*
		57	1.72*	3.15*	5.338	7.406	9.558	10.462	10.334	10.364	1.654*
		57.1	1.72*	3.05*	5.338	7.506	9.458	10.362	10.334	10.264	1.554*
		57.2	1.72*	3.05*	5.438	7.606	9.558	10.262	10.234	10.364	1.554*
		57.3	1.72*	3.05*	5.338	7.606	9.558	10.262	10.234	10.364	1.554*
		57.4	1.62*	3.05*	5.338	7.506	9.458	10.362	10.334	10.364	1.754*
		57.5	1.62*	3.05*	5.438	7.506	9.458	10.362	10.334	10.264	1.754*
		57.6	1.72*	3.15*	5.338	7.506	9.458	10.262	10.234	10.264	1.654*
		57.7	1.72*	3.05*	5.338	7.506	9.358	10.262	10.134	10.164	1.554*
		57.8	1.72*	3.05*	5.238	7.406	9.358	10.362	10.134	10.064	1.554*
		57.9	1.72*	3.05*	5.238	7.406	9.458	10.362	10.234	10.164	1.654*
		58	1.72*	2.95*	5.338	7.606	9.458	10.362	10.234	10.164	1.754*
		58.1	1.72*	2.95*	5.338	7.606	9.458	10.262	10.234	10.264	1.754*
		58.2	1.82*	2.95*	5.338	7.506	9.358	10.262	10.234	10.164	1.754*
		58.3	1.72*	3.05*	5.338	7.506	9.258	10.162	10.234	10.164	1.754*
		58.4	1.72*	3.05*	5.238	7.506	9.258	10.162	10.234	10.164	1.554*
		58.5	1.62*	2.95*	5.238	7.506	9.258	10.162	10.134	10.164	1.654*
		58.6	1.62*	2.95*	5.338	7.606	9.158	10.162	10.034	9.964	1.654*
		58.7	1.72*	2.95*	5.338	7.606	9.358	10.262	10.134	9.964	1.654*
		58.8	1.62*	2.85*	5.238	7.506	9.358	10.262	10.234	10.064	1.754*
		58.9	1.62*	2.95*	5.238	7.506	9.258	10.062	10.234	10.164	1.754*
		59	1.72*	3.05*	5.338	7.606	9.258	10.062	10.134	10.064	1.754*
		59.1	1.62*	2.95*	5.238	7.506	9.158	10.162	10.134	10.064	1.754*
		59.2	1.62*	2.95*	5.238	7.506	9.258	10.162	10.134	10.064	1.654*
		59.3	1.72*	2.85*	5.138	7.406	9.358	10.262	10.034	9.964	1.654*
		59.4	1.72*	2.85*	5.238	7.606	9.358	10.262	9.934	9.864	1.654*
		59.5	1.72*	2.85*	5.238	7.606	9.258	10.162	10.134	9.964	1.754*
		59.6	1.62*	2.85*	5.238	7.606	9.158	10.062	10.134	9.964	1.754*
		59.7	1.62*	2.85*	5.238	7.506	9.158	10.162	10.134	10.064	1.754*
		59.8	1.72*	2.95*	5.238	7.506	9.158	10.162	10.134	9.964	1.754*
		59.9	1.62*	2.85*	5.238	7.606	9.058	10.062	9.934	9.864	1.754*
		60	1.62*	2.85*	5.138	7.606	9.258	10.162	9.934	9.864	1.754*
		60.1	1.62*	2.85*	5.138	7.506	9.258	10.162	9.934	9.864	1.754*
		60.2	1.62*	2.85*	5.138	7.406	9.158	10.062	10.034	9.964	1.854*
		60.3	1.62*	2.85*	5.138	7.406	9.058	10.062	9.934	9.864	1.854*
		60.4	1.62*	2.85*	5.238	7.506	9.058	10.062	10.034	9.864	1.754*
		60.5	1.62*	2.75*	5.138	7.506	9.158	10.062	10.034	9.964	1.754*
		60.6	1.62*	2.85*	5.138	7.506	9.158	10.062	9.934	9.864	1.754*
		60.7	1.52*	2.85*	5.138	7.406	9.058	9.962	9.834	9.764	1.654*
		60.8	1.52*	2.85*	5.138	7.506	9.058	9.962	9.834	9.764	1.754*
		60.9	1.72*	2.85*	5.138	7.506	9.058	9.962	9.834	9.764	1.754*
		61	1.62*	2.75*	5.138	7.406	9.058	10.062	9.934	9.764	1.754*
		61.1	1.62*	2.75*	5.138	7.306	9.058	10.062	9.834	9.864	1.754*
		61.2	1.62*	2.75*	5.238	7.406	8.958	10.062	9.834	9.764	1.854*
		61.3	1.62*	2.75*	5.138	7.406	9.058	9.962	9.834	9.764	1.854*
		61.4	1.62*	2.85*	5.138	7.406	9.058	9.962	9.834	9.764	1.754*
		61.5	1.52*	2.85*	5.138	7.406	8.958	9.862	9.834	9.764	1.654*
		61.6	1.62*	2.85*	5.038	7.206	8.958	9.862	9.734	9.664	1.754*
		61.7	1.62*	2.75*	5.138	7.306	9.058	9.962	9.834	9.764	1.754*
		61.8	1.62*	2.75*	5.038	7.306	8.958	9.962	9.834	9.764	1.754*
		61.9	1.62*	2.75*	5.038	7.306	8.958	9.962	9.834	9.864	1.854*
		62	1.62*	2.75*	5.038	7.306	9.058	9.962	9.734	9.664	1.854*
		62.1	1.62*	2.75*	5.138	7.306	8.958	9.862	9.734	9.664	1.854*
		62.2	1.62*	2.85*	5.138	7.306	8.858	9.862	9.734	9.664	1.754*
		62.3	1.52*	2.65*	5.038	7.206	8.858	9.762	9.834	9.764	1.654*
		62.4	1.52*	2.75*	4.938	7.206	8.958	9.862	9.734	9.764	1.654*
		62.5	1.52*	2.75*	4.938	7.206	9.058	9.862	9.734	9.664	1.754*
		62.6	1.62*	2.75*	4.938	7.206	9.058	9.862	9.734	9.664	1.754*
		62.7	1.62*	2.75*	5.038	7.106	8.958	9.862	9.834	9.764	1.854*
		62.8	1.62*	2.75*	5.038	7.106	8.858	9.862	9.734	9.664	1.854*
		62.9	1.62*	2.75*	5.038	7.106	8.858	9.762	9.634	9.664	1.754*
		63	1.72*	2.75*	4.938	7.206	8.858	9.762	9.634	9.664	1.754*
		63.1	1.62*	2.85*	4.938	7.206	8.858	9.762	9.634	9.664	1.654*
		63.2	1.52*	2.75*	4.938	7.206	8.858	9.762	9.734	9.664	1.654*
		63.3	1.62*	2.75*	5.038	7.206	8.858	9.762	9.734	9.664	1.754*
		63.4	1.62*	2.75*	5.038	7.106	8.758	9.562	9.734	9.664	1.754*
		63.5	1.62*	2.75*	4.938	7.106	8.758	9.562	9.634	9.664	1.754*
		63.6	1.62*	2.75*	4.938	7.106	8.858	9.662	9.634	9.564	1.754*
		63.7	1.62*	2.65*	4.938	7.106	8.858	9.662	9.634	9.664	1.654*
		63.8	1.52*	2.65*	4.838	7.006	8.858	9.662	9.634	9.664	1.654*
		63.9	1.62*	2.75*	4.838	7.006	8.858	9.662	9.634	9.664	1.754*
		64	1.62*	2.85*	4.738	7.006	8.758	9.662	9.534	9.664	1.654*
		64.1	1.62*	2.75*	4.838	7.006	8.658	9.562	9.634	9.664	1.754*
		64.2	1.62*	2.75*	4.938	7.106	8.658	9.562	9.634	9.664	1.754*
		64.3	1.52*	2.75*	4.938	7.106	8.758	9.462	9.734	9.664	1.754*
		64.4	1.52*	2.75*	4.938	7.106	8.758	9.462	9.634	9.664	1.654*
		64.5	1.52*	2.75*	4.838	7.006	8.758	9.462	9.534	9.564	1.654*
		64.6	1.62*	2.75*	4.738	7.006	8.858	9.562	9.534	9.664	1.654*
		64.7	1.52*	2.65*	4.838	6.906	8.758	9.562	9.534	9.664	1.554*
		64.8	1.52*	2.75*	4.838	6.906	8.758	9.462	9.534	9.664	1.554*
		64.9	1.62*	2.75*	4.838	7.006	8.758	9.562	9.434	9.664	1.654*
		65	1.62*	2.75*	4.838	7.006	8.758	9.562	9.534	9.564	1.754*
		65.1	1.52*	2.75*	4.838	7.006	8.758	9.562	9.534	9.564	1.754*
		65.2	1.52*	2.75*	4.738	7.006	8.558	9.462	9.534	9.564	1.754*
		65.3	1.52*	2.75*	4.838	6.906	8.658	9.362	9.534	9.564	1.754*
		65.4	1.62*	2.75*	4.838	6.906	8.658	9.362	9.434	9.564	1.554*
		65.5	1.72*	2.85*	4.838	6.906	8.658	9.362	9.434	9.564	1.554*
		65.6	1.62*	2.75*	4.838	6.906	8.558	9.362	9.434	9.564	1.654*
		65.7	1.62*	2.75*	4.738	6.906	8.658	9.362	9.434	9.464	1.654*
		65.8	1.52*	2.75*	4.738	6.906	8.658	9.462	9.434	9.464	1.654*
		65.9	1.52*	2.75*	4.738	6.906	8.558	9.362	9.334	9.464	1.654*
		66	1.52*	2.75*	4.738	7.006	8.558	9.362	9.234	9.464	1.654*
		66.1	1.52*	2.75*	4.738	6.806	8.558	9.362	9.234	9.364	1.754*
		66.2	1.62*	2.65*	4.638	6.806	8.458	9.262	9.334	9.464	1.654*
		66.3	1.62*	2.75*	4.638	6.806	8.458	9.262	9.334	9.464	1.554*
		66.4	1.52*	2.65*	4.738	6.906	8.458	9.262	9.234	9.464	1.554*
		66.5	1.62*	2.75*	4.738	6.906	8.458	9.262	9.334	9.464	1.554*
		66.6	1.62*	2.75*	4.738	6.906	8.458	9.262	9.334	9.364	1.654*
		66.7	1.52*	2.75*	4.738	6.806	8.558	9.362	9.334	9.364	1.654*
		66.8	1.52*	2.75*	4.638	6.806	8.558	9.362	9.134	9.264	1.654*
		66.9	1.62*	2.75*	4.638	6.806	8.558	9.362	9.134	9.264	1.654*
		67	1.62*	2.75*	4.638	6.806	8.558	9.262	9.134	9.164	1.654*
		67.1	1.52*	2.55*	4.638	6.806	8.558	9.362	9.134	9.164	1.554*
		67.2	1.52*	2.65*	4.738	6.806	8.358	9.262	9.234	9.264	1.554*
		67.3	1.52*	2.65*	4.738	6.806	8.358	9.262	9.234	9.364	1.654*
		67.4	1.52*	2.65*	4.638	6.806	8.358	9.262	9.134	9.264	1.654*
		67.5	1.52*	2.65*	4.638	6.806	8.358	9.162	9.234	9.264	1.654*
		67.6	1.52*	2.65*	4.538	6.706	8.258	9.162	9.134	9.164	1.654*
		67.7	1.52*	2.75*	4.638	6.806	8.258	9.162	9.134	9.164	1.654*
		67.8	1.52*	2.75*	4.638	6.806	8.258	9.162	9.134	9.164	1.554*
		67.9	1.52*	2.65*	4.638	6.706	8.358	9.162	9.034	9.164	1.554*
		68	1.52*	2.55*	4.638	6.806	8.458	9.362	9.034	9.164	1.554*
		68.1	1.52*	2.55*	4.638	6.806	8.458	9.362	9.034	9.064	1.754*
		68.2	1.52*	2.55*	4.638	6.806	8.458	9.362	9.034	9.064	1.754*
		68.3	1.52*	2.65*	4.638	6.806	8.358	9.262	9.134	9.164	1.754*
		68.4	1.52*	2.65*	4.638	6.806	8.358	9.262	9.134	9.164	1.754*
		68.5	1.52*	2.65*	4.638	6.706	8.258	9.162	9.034	9.164	1.654*
		68.6	1.32*	2.45*	4.638	6.706	8.258	9.162	9.034	9.064	1.654*
		68.7	1.32*	2.45*	4.638	6.706	8.258	9.062	9.034	9.064	1.554*
		68.8	1.32*	2.45*	4.638	6.706	8.158	9.062	9.034	9.064	1.654*
		68.9	1.42*	2.45*	4.538	6.706	8.158	9.062	9.034	9.064	1.654*
		69	1.42*	2.45*	4.638	6.706	8.158	9.162	9.134	9.164	1.754*
		69.1	1.52*	2.55*	4.638	6.706	8.158	9.162	9.034	9.164	1.754*
		69.2	1.52*	2.65*	4.638	6.706	8.158	9.062	8.934	9.064	1.654*
		69.3	1.42*	2.55*	4.638	6.606	8.158	9.062	8.934	9.064	1.654*
		69.4	1.42*	2.55*	4.638	6.706	8.158	9.162	8.934	9.164	1.554*
		69.5	1.32*	2.45*	4.638	6.706	8.158	9.062	8.934	9.064	1.554*
		69.6	1.32*	2.45*	4.638	6.606	8.158	9.062	8.934	9.064	1.654*
		69.7	1.42*	2.45*	4.638	6.606	8.158	9.062	8.934	9.064	1.754*
		69.8	1.42*	2.45*	4.638	6.706	8.158	9.062	8.934	9.064	1.754*
		69.9	1.32*	2.45*	4.638	6.706	8.158	8.962	9.034	9.164	1.754*
		70	1.32*	2.45*	4.638	6.606	8.158	8.962	8.934	9.164	1.654*
		70.1	1.32*	2.45*	4.738	6.606	8.058	8.962	8.934	9.164	1.654*
		70.2	1.32*	2.35*	4.638	6.506	8.058	9.062	8.834	9.064	1.654*
		70.3	1.22*	2.35*	4.638	6.506	8.158	9.062	8.834	9.064	1.754*
		70.4	1.32*	2.45*	4.638	6.606	8.258	9.062	8.834	9.064	1.754*
		70.5	1.32*	2.45*	4.638	6.606	8.158	9.062	8.834	9.064	1.654*
		70.6	1.22*	2.35*	4.738	6.606	8.058	8.962	8.934	9.064	1.654*
		70.7	1.22*	2.45*	4.738	6.606	8.058	8.962	8.934	9.064	1.754*
		70.8	1.32*	2.45*	4.738	6.606	8.058	8.962	8.834	8.964	1.754*
		70.9	1.32*	2.45*	4.738	6.606	8.058	8.962	8.834	8.964	1.754*
		71	1.32*	2.45*	4.638	6.506	8.058	8.962	8.834	9.064	1.754*
		71.1	1.22*	2.45*	4.638	6.406	7.958	8.962	8.734	8.864	1.754*
		71.2	1.22*	2.35*	4.638	6.506	7.958	8.962	8.834	8.964	1.754*
		71.3	1.22*	2.35*	4.638	6.506	7.958	8.962	8.834	8.964	1.654*
		71.4	1.22*	2.45*	4.538	6.506	7.958	8.862	8.834	8.964	1.654*
		71.5	1.22*	2.45*	4.538	6.506	8.058	8.962	8.834	8.864	1.654*
		71.6	1.42*	2.55*	4.538	6.506	7.958	8.962	8.834	8.964	1.554*
		71.7	1.32*	2.45*	4.638	6.406	7.858	8.862	8.734	8.964	1.654*
		71.8	1.22*	2.45*	4.738	6.506	7.858	8.862	8.734	8.964	1.654*
		71.9	1.22*	2.45*	4.638	6.406	7.858	8.862	8.634	8.764	1.654*
		72	1.22*	2.45*	4.538	6.406	7.758	8.862	8.634	8.764	1.754*
		72.1	1.22*	2.45*	4.538	6.406	7.758	8.762	8.834	8.864	1.654*
		72.2	1.22*	2.45*	4.538	6.406	7.858	8.862	8.834	8.864	1.654*
		72.3	1.22*	2.45*	4.538	6.406	7.958	8.862	8.834	8.864	1.654*
		72.4	1.22*	2.45*	4.538	6.406	7.958	8.862	8.734	8.864	1.654*
		72.5	1.22*	2.45*	4.638	6.306	7.958	8.862	8.734	8.864	1.554*
		72.6	1.12*	2.35*	4.638	6.406	7.958	8.862	8.734	8.864	1.554*
		72.7	1.22*	2.35*	4.538	6.306	7.758	8.762	8.834	8.964	1.554*
		72.8	1.22*	2.45*	4.538	6.306	7.758	8.762	8.734	8.764	1.554*
		72.9	1.22*	2.45*	4.538	6.306	7.858	8.762	8.634	8.764	1.554*
		73	1.22*	2.35*	4.538	6.306	7.858	8.762	8.734	8.864	1.554*
		73.1	1.22*	2.35*	4.538	6.206	7.858	8.662	8.734	8.864	1.654*
		73.2	1.22*	2.35*	4.538	6.206	7.858	8.762	8.734	8.864	1.654*
		73.3	1.22*	2.45*	4.538	6.306	7.858	8.762	8.734	8.864	1.654*
		73.4	1.22*	2.45*	4.538	6.306	7.858	8.762	8.734	8.764	1.654*
		73.5	1.32*	2.45*	4.438	6.206	7.858	8.862	8.734	8.764	1.654*
		73.6	1.32*	2.45*	4.438	6.206	7.958	8.762	8.734	8.764	1.654*
		73.7	1.22*	2.45*	4.438	6.206	7.858	8.662	8.634	8.664	1.654*
		73.8	1.12*	2.35*	4.438	6.106	7.858	8.662	8.634	8.664	1.554*
		73.9	1.12*	2.35*	4.438	6.206	7.758	8.662	8.734	8.864	1.554*
		74	1.12*	2.35*	4.438	6.206	7.758	8.662	8.734	8.764	1.554*
		74.1	1.22*	2.35*	4.438	6.206	7.858	8.662	8.734	8.764	1.554*
		74.2	1.32*	2.35*	4.538	6.306	7.858	8.662	8.734	8.764	1.554*
		74.3	1.32*	2.45*	4.538	6.306	7.758	8.562	8.734	8.764	1.554*
		74.4	1.32*	2.45*	4.438	6.306	7.758	8.662	8.734	8.764	1.554*
		74.5	1.32*	2.45*	4.338	6.106	7.858	8.662	8.634	8.764	1.654*
		74.6	1.22*	2.45*	4.338	6.106	7.858	8.662	8.534	8.564	1.654*
		74.7	1.22*	2.45*	4.438	6.106	7.758	8.562	8.534	8.564	1.654*
		74.8	1.22*	2.45*	4.438	6.106	7.758	8.562	8.634	8.564	1.554*
		74.9	1.22*	2.45*	4.338	6.106	7.758	8.562	8.634	8.564	1.554*
		75	1.22*	2.35*	4.338	6.106	7.758	8.562	8.634	8.564	1.554*
		75.1	1.32*	2.35*	4.338	6.106	7.858	8.662	8.734	8.564	1.554*
		75.2	1.32*	2.35*	4.338	6.106	7.858	8.562	8.734	8.564	1.554*
		75.3	1.32*	2.35*	4.338	6.106	7.858	8.462	8.634	8.564	1.554*
		75.4	1.32*	2.35*	4.338	6.206	7.758	8.462	8.534	8.464	1.554*
		75.5	1.32*	2.45*	4.338	6.206	7.758	8.462	8.534	8.564	1.554*
		75.6	1.22*	2.45*	4.338	6.206	7.758	8.462	8.534	8.564	1.554*
		75.7	1.22*	2.45*	4.338	6.206	7.858	8.662	8.534	8.564	1.554*
		75.8	1.22*	2.45*	4.338	6.106	7.858	8.562	8.434	8.464	1.654*
		75.9	1.32*	2.35*	4.338	6.106	7.858	8.562	8.434	8.464	1.654*
		76	1.32*	2.35*	4.338	6.106	7.858	8.562	8.434	8.464	1.554*
		76.1	1.32*	2.35*	4.338	6.106	7.858	8.562	8.434	8.464	1.554*
		76.2	1.32*	2.35*	4.338	6.206	7.858	8.462	8.334	8.364	1.554*
		76.3	1.32*	2.45*	4.338	6.206	7.758	8.362	8.334	8.364	1.554*
		76.4	1.32*	2.45*	4.338	6.106	7.758	8.362	8.234	8.264	1.554*
		76.5	1.22*	2.45*	4.338	6.106	7.858	8.462	8.234	8.264	1.554*
		76.6	1.12*	2.25*	4.338	6.106	7.858	8.562	8.234	8.264	1.554*
		76.7	1.12*	2.25*	4.338	6.206	7.858	8.562	8.234	8.264	1.554*
		76.8	1.32*	2.35*	4.338	6.106	7.758	8.462	8.234	8.264	1.354*
		76.9	1.32*	2.35*	4.338	6.106	7.758	8.462	8.234	8.264	1.454*
		77	1.32*	2.35*	4.238	6.106	7.758	8.462	8.234	8.264	1.454*
		77.1	1.22*	2.35*	4.238	6.106	7.858	8.462	8.234	8.264	1.554*
		77.2	1.22*	2.25*	4.238	6.106	7.858	8.462	8.234	8.264	1.554*
		77.3	1.22*	2.25*	4.138	6.006	7.958	8.462	8.234	8.264	1.554*
		77.4	1.22*	2.35*	4.238	6.106	7.958	8.462	8.034	8.164	1.554*
		77.5	1.22*	2.25*	4.338	6.106	7.858	8.562	8.134	8.264	1.554*
		77.6	1.22*	2.25*	4.338	6.106	7.758	8.462	8.134	8.264	1.454*
		77.7	1.32*	2.35*	4.338	6.106	7.758	8.462	8.134	8.164	1.454*
		77.8	1.32*	2.35*	4.238	6.106	7.758	8.362	8.034	8.164	1.354*
		77.9	1.32*	2.35*	4.238	6.106	7.758	8.362	8.034	8.164	1.454*
		78	1.32*	2.35*	4.238	6.106	7.758	8.362	8.034	8.264	1.554*
		78.1	1.22*	2.35*	4.338	6.206	7.758	8.362	8.034	8.264	1.554*
		78.2	1.22*	2.25*	4.238	6.106	7.758	8.362	8.034	8.164	1.454*
		78.3	1.22*	2.35*	4.238	6.006	7.758	8.362	8.034	8.164	1.454*
		78.4	1.22*	2.35*	4.138	6.006	7.758	8.362	8.034	8.164	1.454*
		78.5	1.12*	2.25*	4.138	6.006	7.658	8.362	8.034	8.164	1.454*
		78.6	1.22*	2.35*	4.138	6.106	7.658	8.362	8.034	8.164	1.454*
		78.7	1.22*	2.35*	4.238	6.106	7.658	8.362	7.934	8.064	1.354*
		78.8	1.32*	2.35*	4.238	6.006	7.658	8.362	7.934	7.964	1.354*
		78.9	1.22*	2.25*	4.238	6.006	7.658	8.362	7.834	8.064	1.354*
		79	1.22*	2.25*	4.338	6.106	7.758	8.262	7.934	8.164	1.354*
		79.1	1.22*	2.35*	4.338	6.106	7.758	8.262	7.934	8.164	1.354*
		79.2	1.22*	2.35*	4.238	6.206	7.658	8.262	7.934	8.064	1.354*
		79.3	1.22*	2.35*	4.138	6.006	7.658	8.362	7.934	8.064	1.454*
		79.4	1.22*	2.35*	4.138	6.006	7.658	8.262	7.934	8.064	1.454*
		79.5	1.22*	2.35*	4.238	6.006	7.658	8.262	8.034	8.164	1.454*
		79.6	1.22*	2.35*	4.238	6.006	7.658	8.262	8.034	8.164	1.454*
		79.7	1.12*	2.25*	4.138	6.006	7.458	8.162	7.934	8.064	1.454*
		79.8	1.12*	2.25*	4.138	5.906	7.458	8.162	7.934	8.064	1.354*
		79.9	1.12*	2.25*	4.138	5.906	7.458	8.162	7.934	8.064	1.354*
		80	1.12*	2.25*	4.138	5.906	7.458	8.062	7.934	8.064	1.354*
		80.1	1.12*	2.25*	4.138	6.006	7.458	8.062	8.034	8.064	1.354*
		80.2	1.12*	2.25*	4.138	6.006	7.658	8.162	8.034	8.064	1.354*
		80.3	1.12*	2.25*	4.138	6.006	7.658	8.262	8.034	8.064	1.454*
		80.4	1.12*	2.25*	4.038	6.006	7.558	8.262	7.834	8.064	1.454*
		80.5	1.22*	2.35*	4.038	5.906	7.558	8.262	7.934	8.064	1.454*
		80.6	1.12*	2.25*	4.138	5.906	7.458	8.162	7.934	7.964	1.454*
		80.7	1.22*	2.25*	4.138	5.906	7.458	8.062	7.934	7.964	1.454*
		80.8	1.12*	2.25*	4.138	5.906	7.458	8.062	7.934	7.964	1.454*
		80.9	1.12*	2.25*	4.138	6.006	7.358	8.062	7.934	7.964	1.454*
		81	1.12*	2.25*	4.038	6.006	7.358	8.062	7.834	7.964	1.454*
		81.1	1.12*	2.35*	4.038	5.906	7.358	8.162	7.934	7.864	1.354*
		81.2	1.12*	2.35*	4.038	5.906	7.458	8.162	8.034	7.964	1.354*
		81.3	1.12*	2.35*	4.038	5.906	7.358	8.062	7.934	7.864	1.354*
		81.4	1.12*	2.35*	4.038	5.906	7.258	7.962	7.934	7.864	1.454*
		81.5	1.12*	2.25*	4.238	6.006	7.258	7.962	7.934	7.964	1.454*
		81.6	1.12*	2.25*	4.038	5.906	7.258	7.962	7.834	7.864	1.454*
		81.7	1.02*	2.25*	4.038	5.906	7.358	7.962	7.834	7.864	1.354*
		81.8	1.12*	2.25*	4.038	5.806	7.258	7.962	7.834	7.864	1.454*
		81.9	1.12*	2.25*	4.038	5.906	7.258	7.962	7.834	7.864	1.454*
		82	1.12*	2.25*	4.038	5.906	7.258	7.962	7.934	7.864	1.354*
		82.1	1.12*	2.25*	4.038	5.906	7.358	7.962	7.834	7.864	1.354*
		82.2	1.12*	2.25*	4.038	5.906	7.258	7.962	7.834	7.864	1.354*
		82.3	1.12*	2.25*	4.038	5.906	7.258	8.062	7.834	7.764	1.354*
		82.4	1.12*	2.25*	3.938	5.806	7.258	7.962	7.834	7.764	1.354*
		82.5	1.12*	2.25*	3.938	5.806	7.158	7.862	7.834	7.764	1.454*
		82.6	1.22*	2.25*	3.938	5.706	7.158	7.862	7.834	7.764	1.454*
		82.7	1.12*	2.15*	3.938	5.806	7.058	7.862	7.834	7.764	1.554*
		82.8	1.12*	2.15*	3.938	5.806	7.058	7.862	7.734	7.664	1.454*
		82.9	1.12*	2.15*	4.038	5.906	7.058	7.862	7.734	7.764	1.454*
		83	1.12*	2.15*	4.038	5.906	7.058	7.862	7.634	7.664	1.454*
		83.1	1.12*	2.15*	3.938	5.906	7.158	7.862	7.634	7.664	1.454*
		83.2	1.12*	2.15*	3.938	5.806	7.158	7.862	7.634	7.664	1.354*
		83.3	1.22*	2.05*	3.938	5.806	7.058	7.862	7.734	7.764	1.354*
		83.4	1.12*	2.05*	3.838	5.706	7.058	7.962	7.634	7.764	1.354*
		83.5	1.12*	2.05*	3.838	5.706	7.058	7.962	7.534	7.664	1.354*
		83.6	1.22*	2.15*	3.838	5.806	6.958	7.762	7.634	7.564	1.354*
		83.7	1.22*	2.25*	3.938	5.806	7.058	7.762	7.634	7.564	1.454*
		83.8	1.22*	2.25*	3.938	5.806	7.058	7.762	7.534	7.564	1.454*
		83.9	1.22*	2.25*	4.038	5.806	6.958	7.762	7.534	7.564	1.354*
		84	1.12*	2.05*	3.938	5.806	6.958	7.762	7.534	7.564	1.354*
		84.1	1.12*	2.05*	3.838	5.706	6.958	7.762	7.534	7.564	1.354*
		84.2	1.12*	2.05*	3.838	5.706	6.958	7.762	7.534	7.664	1.254*
		84.3	1.12*	2.05*	3.838	5.706	6.958	7.762	7.534	7.664	1.254*
		84.4	1.22*	2.05*	3.838	5.606	7.058	7.862	7.434	7.564	1.254*
		84.5	1.22*	2.05*	3.838	5.606	7.058	7.862	7.534	7.564	1.354*
		84.6	1.22*	2.05*	3.838	5.606	7.058	7.862	7.534	7.564	1.354*
		84.7	1.22*	2.15*	3.838	5.706	6.858	7.762	7.534	7.564	1.254*
		84.8	1.22*	2.15*	3.838	5.706	6.858	7.762	7.434	7.464	1.354*
		84.9	1.22*	2.05*	3.638	5.606	6.958	7.762	7.434	7.464	1.354*
		85	1.12*	2.05*	3.738	5.506	6.958	7.662	7.534	7.564	1.354*
		85.1	1.12*	2.05*	3.838	5.606	6.958	7.662	7.534	7.664	1.354*
		85.2	1.12*	2.05*	3.838	5.606	6.958	7.662	7.534	7.664	1.354*
		85.3	1.22*	2.05*	3.838	5.606	6.958	7.662	7.534	7.664	1.354*
		85.4	1.22*	2.05*	3.838	5.706	6.958	7.662	7.534	7.664	1.254*
		85.5	1.22*	2.05*	3.738	5.706	6.858	7.662	7.434	7.464	1.254*
		85.6	1.22*	2.05*	3.738	5.706	6.858	7.662	7.434	7.464	1.254*
		85.7	1.22*	2.15*	3.738	5.606	6.958	7.762	7.434	7.464	1.254*
		85.8	1.22*	2.05*	3.638	5.506	6.958	7.762	7.334	7.464	1.354*
		85.9	1.22*	2.05*	3.638	5.506	6.958	7.762	7.334	7.464	1.354*
		86	1.22*	2.05*	3.638	5.506	6.958	7.762	7.334	7.464	1.354*
		86.1	1.22*	2.05*	3.638	5.506	6.858	7.662	7.434	7.664	1.454*
		86.2	1.22*	2.05*	3.638	5.506	6.858	7.662	7.434	7.564	1.354*
		86.3	1.12*	2.05*	3.638	5.506	6.758	7.562	7.534	7.564	1.354*
		86.4	1.22*	2.05*	3.838	5.506	6.758	7.562	7.434	7.464	1.354*
		86.5	1.22*	1.95*	3.838	5.506	6.858	7.562	7.334	7.464	1.254*
		86.6	1.22*	1.95*	3.738	5.506	6.858	7.562	7.334	7.464	1.254*
		86.7	1.22*	2.05*	3.738	5.506	6.958	7.762	7.334	7.464	1.254*
		86.8	1.22*	2.05*	3.638	5.506	6.958	7.762	7.334	7.364	1.254*
		86.9	1.22*	2.05*	3.638	5.506	6.858	7.662	7.334	7.464	1.454*
		87	1.22*	2.05*	3.638	5.506	6.758	7.562	7.434	7.564	1.354*
		87.1	1.22*	2.05*	3.638	5.506	6.758	7.562	7.434	7.564	1.354*
		87.2	1.22*	2.05*	3.738	5.406	6.758	7.562	7.334	7.564	1.354*
		87.3	1.12*	2.05*	3.738	5.506	6.758	7.562	7.334	7.564	1.354*
		87.4	1.12*	1.95*	3.738	5.506	6.758	7.562	7.334	7.564	1.254*
		87.5	1.12*	1.95*	3.738	5.506	6.758	7.462	7.434	7.564	1.254*
		87.6	1.12*	1.95*	3.738	5.506	6.858	7.562	7.434	7.564	1.254*
		87.7	1.22*	1.95*	3.638	5.406	6.858	7.662	7.334	7.364	1.254*
		87.8	1.12*	1.95*	3.638	5.306	6.858	7.662	7.334	7.364	1.354*
		87.9	1.22*	2.05*	3.638	5.406	6.858	7.662	7.334	7.364	1.254*
		88	1.12*	2.05*	3.738	5.406	6.858	7.562	7.234	7.464	1.254*
		88.1	1.12*	2.05*	3.738	5.406	6.958	7.562	7.334	7.564	1.254*
		88.2	1.12*	1.95*	3.638	5.406	6.758	7.462	7.334	7.564	1.354*
		88.3	1.12*	1.95*	3.638	5.406	6.758	7.462	7.334	7.464	1.354*
		88.4	1.12*	1.95*	3.638	5.406	6.758	7.462	7.334	7.464	1.354*
		88.5	1.12*	1.95*	3.638	5.406	6.758	7.362	7.334	7.464	1.354*
		88.6	1.22*	1.95*	3.638	5.406	6.758	7.462	7.334	7.464	1.254*
		88.7	1.22*	1.95*	3.638	5.406	6.758	7.462	7.334	7.464	1.254*
		88.8	1.22*	1.95*	3.638	5.406	6.758	7.462	7.234	7.364	1.254*
		88.9	1.22*	1.95*	3.638	5.406	6.658	7.462	7.234	7.364	1.254*
		89	1.22*	1.95*	3.638	5.406	6.658	7.462	7.234	7.364	1.254*
		89.1	1.12*	1.75*	3.638	5.406	6.758	7.562	7.234	7.364	1.254*
		89.2	1.22*	1.85*	3.738	5.506	6.858	7.562	7.234	7.364	1.154*
		89.3	1.22*	1.85*	3.738	5.406	6.858	7.462	7.234	7.364	1.154*
		89.4	1.22*	1.85*	3.738	5.306	6.758	7.362	7.234	7.364	1.154*
		89.5	1.22*	1.85*	3.638	5.306	6.758	7.362	7.234	7.364	1.254*
		89.6	1.12*	1.95*	3.638	5.306	6.658	7.362	7.234	7.464	1.354*
		89.7	1.12*	1.95*	3.638	5.306	6.658	7.362	7.234	7.364	1.354*
		89.8	1.12*	1.95*	3.638	5.306	6.658	7.362	7.234	7.364	1.254*
		89.9	1.12*	1.95*	3.638	5.206	6.658	7.362	7.234	7.364	1.254*
		90	1.22*	1.95*	3.638	5.306	6.758	7.362	7.234	7.364	1.254*
		90.1	1.22*	1.85*	3.638	5.306	6.758	7.362	7.234	7.464	1.254*
		90.2	1.22*	1.85*	3.638	5.306	6.758	7.362	7.234	7.464	1.254*
		90.3	1.22*	1.85*	3.638	5.306	6.658	7.262	7.234	7.264	1.254*
		90.4	1.22*	1.85*	3.538	5.306	6.658	7.262	7.234	7.264	1.254*
		90.5	1.22*	1.85*	3.738	5.306	6.558	7.262	7.134	7.264	1.254*
		90.6	1.22*	1.95*	3.638	5.206	6.658	7.362	7.134	7.264	1.254*
		90.7	1.22*	1.95*	3.638	5.206	6.658	7.362	7.134	7.264	1.254*
		90.8	1.12*	1.95*	3.638	5.206	6.658	7.262	7.234	7.364	1.254*
		90.9	1.12*	1.95*	3.638	5.206	6.658	7.262	7.234	7.364	1.154*
		91	1.22*	1.85*	3.638	5.306	6.658	7.262	7.234	7.264	1.154*
		91.1	1.22*	1.85*	3.638	5.306	6.658	7.262	7.134	7.364	1.154*
		91.2	1.22*	1.85*	3.638	5.206	6.658	7.362	7.134	7.364	1.254*
		91.3	1.22*	1.85*	3.638	5.206	6.558	7.362	7.234	7.364	1.254*
		91.4	1.32*	1.95*	3.538	5.206	6.458	7.262	7.234	7.364	1.254*
		91.5	1.32*	1.95*	3.538	5.206	6.558	7.162	7.234	7.264	1.254*
		91.6	1.32*	1.95*	3.538	5.206	6.558	7.162	7.234	7.264	1.254*
		91.7	1.22*	1.85*	3.538	5.206	6.558	7.162	7.234	7.264	1.254*
		91.8	1.22*	1.85*	3.638	5.206	6.558	7.162	7.034	7.164	1.254*
		91.9	1.22*	1.95*	3.638	5.206	6.558	7.162	7.034	7.264	1.254*
		92	1.12*	1.95*	3.638	5.206	6.558	7.162	7.034	7.264	1.254*
		92.1	1.12*	1.85*	3.538	5.106	6.558	7.062	7.034	7.164	1.254*
		92.2	1.12*	1.85*	3.538	5.106	6.458	7.062	7.034	7.164	1.354*
		92.3	1.32*	1.95*	3.438	5.106	6.558	7.162	7.134	7.264	1.354*
		92.4	1.32*	1.95*	3.438	5.106	6.558	7.262	7.134	7.264	1.354*
		92.5	1.32*	1.95*	3.438	5.106	6.558	7.262	7.234	7.264	1.454*
		92.6	1.32*	1.95*	3.438	5.106	6.558	7.262	7.134	7.264	1.354*
		92.7	1.32*	1.95*	3.438	5.106	6.458	7.062	7.134	7.164	1.254*
		92.8	1.32*	1.95*	3.538	5.206	6.458	7.062	7.134	7.164	1.254*
		92.9	1.32*	1.85*	3.538	5.206	6.358	7.062	7.134	7.164	1.254*
		93	1.32*	1.95*	3.538	5.206	6.458	7.062	7.134	7.264	1.254*
		93.1	1.22*	1.85*	3.638	5.206	6.458	6.962	7.134	7.264	1.254*
		93.2	1.12*	1.85*	3.638	5.106	6.458	6.962	7.034	7.064	1.254*
		93.3	1.12*	1.85*	3.538	5.106	6.458	6.962	7.034	7.064	1.154*
		93.4	1.12*	1.85*	3.438	5.006	6.458	6.962	7.034	7.064	1.154*
		93.5	1.12*	1.85*	3.438	5.006	6.458	6.962	7.034	7.064	1.154*
		93.6	1.22*	1.95*	3.438	5.006	6.458	7.062	7.034	7.064	1.254*
		93.7	1.22*	1.95*	3.438	5.106	6.458	7.062	7.134	7.164	1.254*
		93.8	1.22*	1.95*	3.438	5.106	6.358	6.962	7.134	7.064	1.254*
		93.9	1.32*	1.85*	3.438	5.106	6.358	6.962	7.134	7.064	1.254*
		94	1.32*	1.85*	3.438	5.006	6.358	6.962	7.134	7.064	1.354*
		94.1	1.22*	1.85*	3.538	5.106	6.358	6.862	7.134	7.064	1.354*
		94.2	1.22*	1.85*	3.638	5.106	6.358	6.862	7.034	6.964	1.254*
		94.3	1.22*	1.95*	3.638	5.106	6.458	6.962	7.034	6.964	1.254*
		94.4	1.22*	1.95*	3.538	5.106	6.358	6.962	7.134	6.964	1.154*
		94.5	1.22*	1.95*	3.438	5.006	6.358	6.962	7.134	7.064	1.254*
		94.6	1.32*	2.05*	3.438	5.006	6.358	6.962	7.134	7.064	1.254*
		94.7	1.22*	1.95*	3.438	5.006	6.358	6.962	7.134	7.064	1.254*
		94.8	1.22*	1.95*	3.438	5.006	6.358	6.962	7.034	7.064	1.254*
		94.9	1.22*	1.95*	3.438	5.006	6.358	6.962	7.034	7.064	1.254*
		95	1.32*	1.95*	3.438	5.006	6.358	6.962	7.034	6.964	1.154*
		95.1	1.32*	1.85*	3.438	5.006	6.258	6.962	7.034	6.964	1.154*
		95.2	1.32*	1.85*	3.438	5.006	6.258	6.962	6.934	6.864	1.154*
		95.3	1.22*	1.95*	3.438	5.006	6.258	6.962	6.934	6.864	1.154*
		95.4	1.22*	1.95*	3.438	5.006	6.358	6.962	6.934	6.864	1.154*
		95.5	1.22*	1.95*	3.338	5.006	6.458	6.962	7.034	6.964	1.154*
		95.6	1.12*	1.85*	3.338	4.906	6.358	6.862	7.134	6.964	1.154*
		95.7	1.12*	1.85*	3.438	4.906	6.358	6.862	7.034	7.064	1.154*
		95.8	1.12*	1.85*	3.538	5.006	6.258	6.862	7.034	6.964	1.254*
		95.9	1.12*	1.85*	3.538	5.006	6.258	6.862	7.034	6.964	1.154*
		96	1.12*	1.75*	3.438	4.906	6.258	6.862	7.034	6.964	1.154*
		96.1	1.12*	1.75*	3.438	5.006	6.258	6.862	7.034	6.964	1.154*
		96.2	1.02*	1.85*	3.438	5.006	6.258	6.862	7.034	6.964	1.154*
		96.3	1.02*	1.85*	3.438	5.006	6.258	6.962	7.034	6.964	1.154*
		96.4	1.12*	1.85*	3.438	4.906	6.158	6.862	7.034	6.964	1.154*
		96.5	1.12*	1.85*	3.438	4.906	6.158	6.762	6.934	6.864	1.154*
		96.6	1.12*	1.85*	3.338	4.906	6.158	6.762	6.934	6.864	1.154*
		96.7	1.12*	1.85*	3.338	4.906	6.258	6.862	6.934	6.864	1.154*
		96.8	1.12*	1.85*	3.438	4.906	6.258	6.862	6.834	6.764	1.054*
		96.9	1.12*	1.85*	3.438	4.906	6.258	6.862	6.934	6.764	1.054*
		97	1.22*	1.95*	3.338	4.806	6.258	6.862	7.034	6.864	1.054*
		97.1	1.12*	1.85*	3.438	5.006	6.258	6.862	7.034	6.864	1.054*
		97.2	1.02*	1.85*	3.438	5.006	6.258	6.862	6.934	6.764	0.954*
		97.3	1.02*	1.95*	3.438	4.906	6.258	6.862	6.934	6.864	1.054*
		97.4	1.02*	1.95*	3.338	4.906	6.058	6.662	6.934	6.864	1.054*
		97.5	1.02*	1.95*	3.338	4.906	6.058	6.662	6.934	6.864	1.154*
		97.6	1.12*	1.95*	3.338	4.906	6.058	6.662	6.934	6.864	1.154*
		97.7	1.12*	1.85*	3.338	4.906	6.158	6.762	6.934	6.864	1.054*
		97.8	1.12*	1.85*	3.338	4.906	6.158	6.762	6.934	6.864	1.054*
		97.9	1.02*	1.75*	3.238	4.806	6.258	6.762	6.734	6.664	1.054*
		98	1.02*	1.75*	3.238	4.806	6.258	6.762	6.734	6.664	1.054*
		98.1	1.02*	1.75*	3.338	4.906	6.158	6.762	6.734	6.664	1.054*
		98.2	1.02*	1.75*	3.338	4.806	6.158	6.662	6.734	6.764	1.054*
		98.3	0.92*	1.75*	3.438	4.906	6.058	6.662	6.834	6.764	1.054*
		98.4	1.02*	1.95*	3.438	4.906	6.058	6.662	6.834	6.764	1.054*
		98.5	1.02*	1.95*	3.338	4.906	6.058	6.662	6.834	6.764	1.054*
		98.6	1.02*	1.95*	3.338	4.906	6.058	6.662	6.734	6.764	1.054*
		98.7	0.92*	1.85*	3.238	4.806	6.058	6.662	6.734	6.764	1.154*
		98.8	0.92*	1.85*	3.238	4.806	6.058	6.662	6.734	6.764	1.154*
		98.9	0.92*	1.75*	3.238	4.806	5.958	6.662	6.734	6.664	1.154*
		99	0.92*	1.75*	3.238	4.806	6.058	6.662	6.734	6.664	1.154*
		99.1	1.02*	1.75*	3.238	4.806	5.958	6.462	6.734	6.664	1.154*
		99.2	1.02*	1.75*	3.238	4.806	5.958	6.462	6.734	6.664	1.154*
		99.3	1.02*	1.75*	3.338	4.906	5.958	6.462	6.634	6.664	1.154*
		99.4	1.02*	1.75*	3.338	4.906	6.058	6.662	6.634	6.664	1.154*
		99.5	1.02*	1.75*	3.238	4.806	6.058	6.662	6.734	6.664	1.054*
		99.6	1.02*	1.75*	3.238	4.806	5.958	6.662	6.734	6.664	1.054*
		99.7	1.02*	1.85*	3.338	4.806	5.958	6.662	6.734	6.664	0.954*
		99.8	1.02*	1.85*	3.338	4.806	5.958	6.662	6.534	6.564	1.054*
		99.9	1.02*	1.85*	3.238	4.806	6.058	6.562	6.534	6.564	1.054*
		100	1.02*	1.75*	3.238	4.806	6.058	6.562	6.534	6.564	1.054*
		100.1	1.02*	1.75*	3.238	4.706	6.058	6.562	6.534	6.564	1.154*
		100.2	1.02*	1.75*	3.238	4.706	6.058	6.562	6.534	6.564	1.154*
		100.3	1.02*	1.75*	3.238	4.706	5.958	6.562	6.434	6.564	1.154*
		100.4	0.92*	1.75*	3.238	4.706	5.858	6.462	6.434	6.564	1.054*
		100.5	1.02*	1.75*	3.238	4.706	5.858	6.462	6.434	6.564	1.054*
		100.6	0.92*	1.75*	3.238	4.806	5.858	6.462	6.434	6.464	1.054*
		100.7	1.02*	1.75*	3.238	4.806	5.858	6.462	6.434	6.464	1.054*
		100.8	1.02*	1.75*	3.238	4.806	5.858	6.462	6.534	6.564	1.054*
		100.9	1.02*	1.75*	3.338	4.906	5.858	6.562	6.434	6.464	1.054*
		101	0.92*	1.65*	3.438	4.906	5.858	6.462	6.334	6.464	1.054*
		101.1	0.92*	1.55*	3.438	4.806	5.858	6.462	6.334	6.464	1.054*
		101.2	0.92*	1.55*	3.438	4.806	5.858	6.462	6.334	6.464	1.054*
		101.3	0.92*	1.65*	3.438	4.806	5.858	6.462	6.334	6.464	1.054*
		101.4	1.02*	1.75*	3.438	4.806	5.858	6.462	6.334	6.464	1.054*
		101.5	1.02*	1.75*	3.338	4.706	5.858	6.462	6.334	6.464	1.054*
		101.6	1.02*	1.75*	3.238	4.706	5.758	6.362	6.334	6.364	1.054*
		101.7	1.02*	1.75*	3.238	4.706	5.758	6.362	6.234	6.364	1.154*
		101.8	1.02*	1.75*	3.238	4.706	5.758	6.362	6.234	6.364	1.154*
		101.9	1.02*	1.65*	3.238	4.706	5.858	6.362	6.134	6.264	1.154*
		102	1.02*	1.65*	3.238	4.706	5.858	6.362	6.234	6.264	1.054*
		102.1	1.02*	1.65*	3.238	4.606	5.758	6.362	6.234	6.364	1.054*
		102.2	1.12*	1.65*	3.238	4.706	5.758	6.462	6.234	6.364	1.054*
		102.3	1.12*	1.65*	3.238	4.706	5.758	6.462	6.234	6.364	1.054*
		102.4	1.12*	1.65*	3.238	4.706	5.758	6.462	6.334	6.464	1.054*
		102.5	1.22*	1.75*	3.338	4.806	5.758	6.462	6.334	6.464	1.054*
		102.6	1.12*	1.65*	3.238	4.806	5.758	6.462	6.334	6.364	1.054*
		102.7	1.12*	1.75*	3.238	4.806	5.758	6.462	6.234	6.364	1.054*
		102.8	1.12*	1.75*	3.238	4.806	5.858	6.462	6.234	6.364	1.054*
		102.9	1.12*	1.75*	3.238	4.806	5.858	6.362	6.234	6.364	1.054*
		103	1.02*	1.75*	3.338	4.706	5.758	6.362	6.234	6.364	1.054*
		103.1	1.02*	1.75*	3.338	4.706	5.758	6.362	6.234	6.364	1.154*
		103.2	1.02*	1.65*	3.238	4.706	5.658	6.262	6.334	6.364	0.954*
		103.3	1.02*	1.65*	3.138	4.606	5.758	6.362	6.334	6.364	0.954*
		103.4	1.02*	1.65*	3.138	4.706	5.758	6.362	6.334	6.364	0.954*
		103.5	1.02*	1.65*	3.138	4.706	5.758	6.362	6.334	6.264	0.954*
		103.6	1.02*	1.65*	3.138	4.706	5.758	6.362	6.334	6.264	0.954*
		103.7	1.12*	1.65*	3.138	4.706	5.758	6.362	6.234	6.164	0.954*
		103.8	1.12*	1.65*	3.138	4.706	5.758	6.262	6.134	6.164	0.954*
		103.9	1.12*	1.75*	3.138	4.606	5.758	6.262	6.134	6.164	0.954*
		104	1.02*	1.75*	3.138	4.606	5.758	6.362	6.134	6.164	0.954*
		104.1	1.02*	1.75*	3.138	4.606	5.758	6.362	6.134	6.164	1.054*
		104.2	1.02*	1.75*	3.238	4.706	5.758	6.362	6.234	6.364	1.054*
		104.3	1.02*	1.75*	3.238	4.706	5.658	6.362	6.234	6.364	1.054*
		104.4	1.02*	1.75*	3.238	4.706	5.658	6.362	6.234	6.264	1.154*
		104.5	1.02*	1.65*	3.238	4.706	5.758	6.362	6.234	6.264	1.154*
		104.6	1.02*	1.65*	3.238	4.706	5.758	6.362	6.134	6.264	1.154*
		104.7	1.02*	1.65*	3.138	4.706	5.858	6.362	6.134	6.264	1.154*
		104.8	1.12*	1.65*	3.038	4.606	5.858	6.362	6.134	6.264	1.154*
		104.9	1.12*	1.65*	3.038	4.606	5.658	6.262	6.134	6.264	1.154*
		105	1.12*	1.65*	3.038	4.606	5.658	6.262	6.134	6.164	1.154*
		105.1	1.12*	1.75*	3.038	4.606	5.658	6.262	6.234	6.164	1.154*
		105.2	1.12*	1.75*	3.138	4.706	5.658	6.262	6.234	6.164	1.054*
		105.3	1.12*	1.75*	3.238	4.706	5.658	6.262	6.134	6.064	0.954*
		105.4	1.02*	1.75*	3.238	4.706	5.658	6.262	6.134	6.064	0.954*
		105.5	1.02*	1.75*	3.238	4.706	5.658	6.162	6.034	6.064	0.954*
		105.6	1.02*	1.75*	3.138	4.706	5.658	6.162	6.034	6.064	0.954*
		105.7	0.92*	1.65*	3.138	4.706	5.658	6.162	6.034	6.064	1.054*
		105.8	0.92*	1.65*	3.138	4.706	5.558	6.162	6.034	6.064	1.054*
		105.9	0.92*	1.65*	3.138	4.606	5.658	6.262	6.134	6.064	1.054*
		106	0.92*	1.65*	3.038	4.606	5.658	6.362	6.134	6.064	1.054*
		106.1	1.02*	1.65*	3.038	4.606	5.658	6.362	6.134	6.064	1.054*
		106.2	1.02*	1.55*	3.038	4.606	5.658	6.262	6.034	6.064	1.054*
		106.3	1.02*	1.65*	3.038	4.606	5.658	6.262	6.034	6.064	1.054*
		106.4	1.02*	1.65*	3.038	4.606	5.658	6.262	6.034	6.064	1.054*
		106.5	1.02*	1.65*	3.038	4.606	5.758	6.262	6.034	6.064	1.054*
		106.6	1.02*	1.65*	3.138	4.606	5.758	6.262	6.034	6.064	1.054*
		106.7	1.02*	1.65*	3.138	4.606	5.658	6.262	6.134	5.964	1.054*
		106.8	1.02*	1.65*	3.138	4.606	5.658	6.262	6.134	6.064	1.154*
		106.9	0.92*	1.65*	3.138	4.606	5.658	6.262	6.034	5.964	1.054*
		107	0.92*	1.65*	3.038	4.606	5.658	6.262	5.934	5.964	1.154*
		107.1	0.92*	1.65*	3.038	4.506	5.658	6.262	5.934	5.964	1.154*
		107.2	0.92*	1.65*	3.038	4.606	5.658	6.162	5.934	5.964	1.054*
		107.3	0.92*	1.75*	3.038	4.606	5.658	6.162	5.934	5.964	1.054*
		107.4	0.82*	1.65*	3.138	4.606	5.558	6.162	5.934	5.964	1.054*
		107.5	0.82*	1.65*	3.138	4.606	5.558	6.262	5.934	5.964	1.054*
		107.6	0.82*	1.65*	3.138	4.606	5.658	6.362	6.034	6.064	1.054*
		107.7	1.02*	1.65*	3.138	4.606	5.658	6.262	6.034	5.964	1.054*
		107.8	1.02*	1.65*	3.138	4.606	5.658	6.262	6.034	5.964	1.054*
		107.9	1.02*	1.65*	3.138	4.606	5.658	6.162	5.934	5.964	1.154*
		108	1.02*	1.65*	3.138	4.606	5.658	6.162	5.934	5.964	1.154*
		108.1	1.02*	1.65*	3.138	4.606	5.658	6.162	5.834	5.864	1.154*
		108.2	1.02*	1.65*	3.138	4.506	5.658	6.162	5.834	5.864	1.154*
		108.3	1.02*	1.75*	3.038	4.506	5.658	6.162	5.834	5.864	1.154*
		108.4	1.02*	1.75*	3.138	4.506	5.658	6.162	5.734	5.864	1.054*
		108.5	1.02*	1.75*	3.138	4.506	5.558	6.162	5.734	5.764	1.154*
		108.6	1.02*	1.75*	3.138	4.506	5.558	6.062	5.734	5.764	1.054*
		108.7	1.02*	1.75*	3.138	4.506	5.558	6.162	5.734	5.764	1.054*
		108.8	1.02*	1.65*	3.238	4.606	5.558	6.162	5.734	5.764	1.054*
		108.9	1.02*	1.65*	3.138	4.606	5.458	6.062	5.734	5.864	1.054*
		109	0.92*	1.55*	3.138	4.606	5.458	6.062	5.834	5.864	1.054*
		109.1	0.92*	1.55*	3.138	4.606	5.458	6.062	5.934	5.964	1.054*
		109.2	1.02*	1.55*	3.138	4.606	5.458	5.962	5.934	5.964	1.054*
		109.3	1.02*	1.55*	3.238	4.606	5.458	5.962	5.834	5.764	1.054*
		109.4	1.02*	1.55*	3.238	4.506	5.458	5.962	5.834	5.764	1.154*
		109.5	1.02*	1.55*	3.238	4.506	5.358	5.962	5.834	5.764	1.154*
		109.6	1.02*	1.55*	3.138	4.506	5.358	5.962	5.734	5.764	1.154*
		109.7	1.02*	1.65*	3.138	4.506	5.458	6.162	5.734	5.764	1.154*
		109.8	1.02*	1.65*	3.138	4.506	5.458	6.162	5.734	5.764	1.154*
		109.9	1.02*	1.65*	3.138	4.506	5.458	6.162	5.734	5.764	1.154*
		110	0.92*	1.55*	3.138	4.506	5.358	5.962	5.734	5.764	1.154*
		110.1	0.92*	1.55*	3.138	4.506	5.458	5.962	5.734	5.764	1.154*
		110.2	0.92*	1.55*	3.138	4.506	5.458	5.962	5.734	5.764	1.054*
		110.3	0.92*	1.55*	3.138	4.406	5.458	5.962	5.734	5.764	1.054*
		110.4	0.92*	1.55*	3.138	4.506	5.458	6.062	5.634	5.664	1.154*
		110.5	0.92*	1.55*	3.138	4.506	5.458	6.062	5.734	5.664	1.054*
		110.6	0.92*	1.55*	3.238	4.506	5.458	6.062	5.734	5.664	1.054*
		110.7	0.92*	1.55*	3.338	4.606	5.458	6.062	5.634	5.564	1.054*
		110.8	1.02*	1.65*	3.338	4.606	5.458	5.962	5.634	5.564	1.054*
		110.9	1.02*	1.75*	3.238	4.506	5.358	5.962	5.634	5.664	1.154*
		111	1.12*	1.75*	3.138	4.506	5.358	5.962	5.634	5.664	1.154*
		111.1	1.12*	1.75*	3.138	4.506	5.358	5.962	5.634	5.564	1.154*
		111.2	1.12*	1.75*	3.138	4.406	5.358	5.962	5.634	5.564	1.154*
		111.3	1.12*	1.65*	3.138	4.406	5.358	5.962	5.634	5.564	1.154*
		111.4	1.02*	1.65*	3.138	4.406	5.358	5.962	5.534	5.564	1.154*
		111.5	1.02*	1.65*	3.138	4.406	5.358	5.862	5.534	5.564	1.154*
		111.6	0.92*	1.55*	3.138	4.406	5.358	5.862	5.634	5.664	1.154*
		111.7	0.92*	1.55*	3.138	4.406	5.358	5.962	5.634	5.664	0.954*
		111.8	0.92*	1.55*	3.138	4.406	5.458	5.962	5.734	5.664	0.954*
		111.9	0.92*	1.55*	3.138	4.306	5.458	5.962	5.734	5.664	0.954*
		112	0.92*	1.55*	3.138	4.306	5.458	5.962	5.734	5.664	0.954*
		112.1	1.02*	1.55*	3.138	4.406	5.358	5.962	5.734	5.664	0.954*
		112.2	1.02*	1.55*	3.138	4.406	5.358	5.862	5.734	5.564	0.954*
		112.3	1.02*	1.55*	3.138	4.406	5.258	5.762	5.734	5.664	0.954*
		112.4	0.92*	1.45*	3.138	4.406	5.258	5.762	5.534	5.564	0.954*
		112.5	0.92*	1.45*	3.038	4.406	5.258	5.762	5.534	5.564	0.954*
		112.6	1.02*	1.65*	3.038	4.406	5.258	5.762	5.534	5.564	0.954*
		112.7	1.02*	1.65*	3.038	4.406	5.258	5.762	5.534	5.564	0.954*
		112.8	1.02*	1.65*	3.038	4.306	5.258	5.762	5.534	5.564	0.954*
		112.9	1.02*	1.65*	3.038	4.306	5.258	5.762	5.534	5.564	1.054*
		113	1.02*	1.65*	3.038	4.306	5.258	5.862	5.634	5.564	0.954*
		113.1	1.02*	1.65*	3.038	4.306	5.258	5.762	5.634	5.564	0.954*
		113.2	1.02*	1.65*	3.038	4.306	5.258	5.762	5.534	5.564	0.954*
		113.3	0.92*	1.55*	3.038	4.306	5.358	5.862	5.534	5.464	0.954*
		113.4	0.92*	1.45*	3.038	4.306	5.358	5.862	5.534	5.464	0.954*
		113.5	0.82*	1.45*	3.038	4.206	5.358	5.862	5.534	5.464	0.954*
		113.6	0.82*	1.45*	3.038	4.206	5.358	5.862	5.534	5.464	0.954*
		113.7	0.82*	1.45*	3.038	4.206	5.358	5.862	5.634	5.564	0.954*
		113.8	0.82*	1.45*	3.038	4.206	5.358	5.762	5.634	5.464	0.854*
		113.9	0.82*	1.45*	3.138	4.306	5.358	5.762	5.634	5.464	0.854*
		114	0.82*	1.55*	3.138	4.306	5.358	5.762	5.634	5.464	0.854*
		114.1	0.92*	1.55*	3.138	4.306	5.358	5.762	5.634	5.464	0.854*
		114.2	0.92*	1.55*	3.138	4.306	5.458	5.762	5.634	5.364	0.854*
		114.3	0.92*	1.55*	3.138	4.306	5.358	5.762	5.634	5.364	0.854*
		114.4	0.92*	1.55*	3.138	4.306	5.358	5.762	5.634	5.464	0.854*
		114.5	0.92*	1.45*	3.038	4.306	5.358	5.762	5.634	5.464	0.754*
		114.6	0.92*	1.45*	3.038	4.306	5.358	5.762	5.634	5.464	0.954*
		114.7	1.02*	1.55*	3.038	4.306	5.358	5.762	5.534	5.464	0.954*
		114.8	1.02*	1.55*	3.038	4.206	5.358	5.762	5.534	5.464	0.954*
		114.9	0.92*	1.55*	3.038	4.206	5.358	5.762	5.534	5.464	0.954*
		115	0.92*	1.55*	3.038	4.206	5.258	5.762	5.534	5.464	0.954*
		115.1	0.92*	1.65*	3.038	4.206	5.258	5.762	5.534	5.464	0.954*
		115.2	0.92*	1.65*	3.038	4.306	5.358	5.762	5.534	5.364	0.954*
		115.3	0.92*	1.65*	2.938	4.206	5.358	5.762	5.634	5.364	0.954*
		115.4	0.92*	1.65*	2.938	4.206	5.358	5.762	5.634	5.364	0.954*
		115.5	0.92*	1.65*	2.938	4.206	5.358	5.762	5.534	5.364	0.954*
		115.6	0.82*	1.55*	2.938	4.206	5.358	5.762	5.534	5.364	0.854*
		115.7	0.82*	1.55*	3.038	4.306	5.358	5.762	5.534	5.364	0.954*
		115.8	0.92*	1.55*	3.038	4.306	5.358	5.762	5.534	5.364	0.854*
		115.9	0.92*	1.55*	3.038	4.306	5.358	5.662	5.534	5.364	0.954*
		116	0.92*	1.55*	3.038	4.206	5.258	5.662	5.534	5.364	0.854*
		116.1	0.92*	1.55*	2.938	4.206	5.258	5.662	5.534	5.364	0.754*
		116.2	0.92*	1.55*	2.938	4.206	5.258	5.662	5.534	5.364	0.854*
		116.3	0.82*	1.55*	2.938	4.206	5.158	5.562	5.534	5.364	0.854*
		116.4	0.82*	1.55*	2.938	4.206	5.258	5.662	5.534	5.364	0.854*
		116.5	0.82*	1.55*	2.838	4.106	5.258	5.662	5.534	5.364	0.954*
		116.6	0.82*	1.55*	2.938	4.106	5.258	5.762	5.434	5.364	0.954*
		116.7	0.82*	1.55*	2.938	4.206	5.358	5.762	5.434	5.364	0.954*
		116.8	0.82*	1.55*	2.938	4.206	5.358	5.762	5.434	5.364	0.954*
		116.9	0.82*	1.55*	2.938	4.206	5.258	5.662	5.534	5.364	0.954*
		117	0.82*	1.55*	3.038	4.306	5.258	5.662	5.534	5.264	0.954*
		117.1	0.82*	1.55*	3.038	4.206	5.258	5.662	5.534	5.264	0.954*
		117.2	0.92*	1.55*	3.038	4.206	5.258	5.662	5.534	5.264	0.954*
		117.3	0.82*	1.45*	3.038	4.206	5.258	5.662	5.534	5.264	0.954*
		117.4	0.82*	1.45*	3.038	4.206	5.258	5.662	5.434	5.164	0.954*
		117.5	0.82*	1.45*	3.038	4.206	5.258	5.662	5.334	5.164	0.954*
		117.6	0.82*	1.45*	2.938	4.206	5.258	5.662	5.334	5.164	0.954*
		117.7	0.82*	1.45*	2.938	4.206	5.158	5.662	5.334	5.164	0.954*
		117.8	0.82*	1.45*	2.938	4.206	5.158	5.662	5.334	5.164	0.954*
		117.9	0.82*	1.45*	2.838	4.006	5.158	5.662	5.334	5.164	0.954*
		118	0.82*	1.45*	2.838	4.006	5.158	5.662	5.334	5.064	0.954*
		118.1	0.72*	1.45*	2.838	4.006	5.158	5.662	5.434	5.164	0.954*
		118.2	0.72*	1.45*	2.838	4.106	5.358	5.762	5.434	5.164	0.854*
		118.3	0.82*	1.65*	2.938	4.206	5.358	5.762	5.334	5.164	0.954*
		118.4	0.82*	1.55*	2.938	4.206	5.358	5.762	5.334	5.264	0.954*
		118.5	0.82*	1.55*	2.938	4.206	5.258	5.762	5.334	5.264	0.954*
		118.6	0.82*	1.55*	2.938	4.206	5.158	5.662	5.334	5.264	0.954*
		118.7	0.82*	1.55*	2.938	4.206	5.158	5.662	5.434	5.264	0.954*
		118.8	0.82*	1.55*	2.838	4.106	5.158	5.562	5.434	5.264	0.954*
		118.9	0.82*	1.55*	2.838	4.106	5.158	5.562	5.434	5.264	0.954*
		119	0.82*	1.55*	2.838	4.106	5.158	5.562	5.334	5.164	0.954*
		119.1	0.82*	1.55*	2.838	4.106	5.158	5.562	5.334	5.164	0.954*
		119.2	0.82*	1.55*	2.838	4.006	5.158	5.562	5.334	5.064	0.954*
		119.3	0.72*	1.55*	2.838	4.006	5.158	5.562	5.334	5.064	0.954*
		119.4	0.72*	1.55*	2.838	4.006	5.058	5.562	5.234	5.064	0.954*
		119.5	0.72*	1.45*	2.938	4.106	5.058	5.562	5.234	5.064	0.954*
		119.6	0.72*	1.45*	2.838	4.106	5.058	5.562	5.234	5.064	0.954*
		119.7	0.72*	1.35*	2.838	4.106	5.058	5.562	5.234	5.064	0.954*
		119.8	0.82*	1.45*	2.838	4.206	5.058	5.562	5.234	5.064	0.954*
		119.9	0.82*	1.55*	2.938	4.206	5.058	5.462	5.334	5.164	0.954*
		120	0.82*	1.55*	2.938	4.206	5.158	5.462	5.334	5.164	0.954*
		120.1	0.82*	1.55*	2.938	4.206	5.158	5.462	5.334	5.264	0.954*
		120.2	0.82*	1.55*	2.938	4.206	5.158	5.462	5.434	5.264	0.954*
		120.3	0.82*	1.55*	2.938	4.206	5.058	5.462	5.434	5.264	1.054*
		120.4	0.82*	1.55*	2.838	4.006	4.958	5.362	5.334	5.164	1.054*
		120.5	0.82*	1.55*	2.838	4.006	4.958	5.362	5.234	5.064	0.954*
		120.6	0.82*	1.55*	2.838	4.006	4.958	5.362	5.234	5.064	0.954*
		120.7	0.82*	1.55*	2.838	4.006	4.958	5.362	5.234	5.064	0.954*
		120.8	0.92*	1.65*	2.738	4.006	4.958	5.362	5.234	5.064	0.954*
		120.9	0.82*	1.55*	2.738	4.006	4.958	5.362	5.234	5.064	0.954*
		121	0.82*	1.45*	2.738	4.006	4.958	5.362	5.234	5.064	0.954*
		121.1	0.92*	1.45*	2.738	4.006	4.958	5.362	5.234	5.064	0.954*
		121.2	0.82*	1.45*	2.738	4.006	4.958	5.362	5.234	5.064	0.854*
		121.3	0.82*	1.55*	2.838	4.006	4.858	5.362	5.234	5.064	0.854*
		121.4	0.82*	1.55*	2.838	4.006	4.858	5.362	5.234	5.064	0.854*
		121.5	0.82*	1.55*	2.838	4.006	4.858	5.262	5.234	5.064	0.854*
		121.6	0.82*	1.55*	2.838	4.006	4.858	5.262	5.234	5.064	1.054*
		121.7	0.82*	1.55*	2.738	3.906	4.858	5.262	5.234	5.064	1.054*
		121.8	0.82*	1.55*	2.738	3.906	4.858	5.262	5.234	5.064	1.054*
		121.9	0.82*	1.45*	2.738	3.906	4.858	5.262	5.234	5.064	1.054*
		122	0.72*	1.35*	2.638	3.806	4.758	5.262	5.234	5.064	1.054*
		122.1	0.72*	1.35*	2.638	3.806	4.758	5.262	5.234	5.064	1.054*
		122.2	0.72*	1.35*	2.638	3.806	4.858	5.262	5.234	4.964	1.054*
		122.3	0.72*	1.45*	2.638	3.906	4.858	5.262	5.234	4.964	1.054*
		122.4	0.82*	1.55*	2.638	3.906	4.858	5.262	5.234	4.964	0.954*
		122.5	0.82*	1.55*	2.638	3.906	4.858	5.262	5.234	4.964	0.954*
		122.6	0.82*	1.55*	2.638	3.906	4.858	5.262	5.234	4.964	0.954*
		122.7	0.82*	1.45*	2.638	3.906	4.858	5.262	5.234	4.964	0.854*
		122.8	0.82*	1.45*	2.738	3.906	4.858	5.262	5.234	4.964	0.854*
		122.9	0.92*	1.45*	2.738	3.906	4.858	5.262	5.234	5.064	0.854*
		123	0.92*	1.45*	2.738	3.806	4.858	5.262	5.134	5.064	0.854*
		123.1	0.92*	1.45*	2.638	3.806	4.858	5.262	5.034	4.864	0.854*
		123.2	0.82*	1.45*	2.738	3.906	4.858	5.262	5.034	4.864	0.854*
		123.3	0.82*	1.45*	2.738	3.906	4.758	5.262	5.134	4.964	0.854*
		123.4	0.82*	1.45*	2.738	3.906	4.658	5.162	5.134	4.964	0.854*
		123.5	0.72*	1.35*	2.738	3.906	4.658	5.062	5.134	4.964	0.854*
		123.6	0.72*	1.35*	2.738	3.906	4.658	5.062	5.134	4.964	0.854*
		123.7	0.72*	1.45*	2.738	3.906	4.658	5.062	5.134	4.964	0.854*
		123.8	0.72*	1.45*	2.638	3.906	4.658	5.062	5.134	4.964	0.854*
		123.9	0.82*	1.55*	2.738	3.906	4.658	5.162	5.134	4.964	0.854*
		124	0.82*	1.55*	2.738	3.906	4.658	5.162	5.034	4.864	0.854*
		124.1	0.82*	1.55*	2.738	3.806	4.658	5.162	5.034	4.864	0.854*
		124.2	0.82*	1.45*	2.738	3.806	4.758	5.162	5.034	4.864	0.954*
		124.3	0.82*	1.45*	2.738	3.806	4.758	5.162	5.134	4.864	0.954*
		124.4	0.82*	1.45*	2.738	3.806	4.658	5.062	5.034	4.764	0.854*
		124.5	0.82*	1.45*	2.638	3.806	4.658	5.062	5.034	4.764	0.854*
		124.6	0.72*	1.45*	2.638	3.806	4.658	5.062	5.034	4.764	0.854*
		124.7	0.72*	1.45*	2.638	3.806	4.658	5.062	5.034	4.764	0.854*
		124.8	0.72*	1.35*	2.638	3.806	4.758	5.162	5.034	4.764	0.854*
		124.9	0.72*	1.45*	2.638	3.706	4.758	5.162	5.034	4.864	0.854*
		125	0.72*	1.45*	2.638	3.706	4.758	5.162	5.134	4.964	0.754*
		125.1	0.72*	1.45*	2.638	3.706	4.658	5.062	5.134	4.964	0.754*
		125.2	0.72*	1.45*	2.638	3.706	4.658	5.062	5.134	4.864	0.754*
		125.3	0.72*	1.45*	2.638	3.706	4.658	5.062	5.034	4.864	0.754*
		125.4	0.72*	1.45*	2.638	3.706	4.658	5.162	5.034	4.864	0.754*
		125.5	0.72*	1.45*	2.738	3.806	4.658	5.162	5.034	4.864	0.754*
		125.6	0.72*	1.35*	2.638	3.806	4.658	5.062	5.034	4.864	0.754*
		125.7	0.72*	1.35*	2.638	3.806	4.658	5.062	5.034	4.864	0.754*
		125.8	0.72*	1.35*	2.638	3.806	4.558	5.062	5.034	4.864	0.754*
		125.9	0.72*	1.35*	2.638	3.706	4.558	5.062	5.034	4.864	0.854*
		126	0.72*	1.35*	2.638	3.706	4.558	5.062	5.034	4.864	0.854*
		126.1	0.72*	1.45*	2.638	3.706	4.558	5.062	4.934	4.864	0.754*
		126.2	0.62*	1.35*	2.538	3.606	4.558	5.062	4.834	4.664	0.754*
		126.3	0.62*	1.35*	2.538	3.606	4.558	5.062	4.834	4.664	0.754*
		126.4	0.62*	1.35*	2.538	3.606	4.558	5.062	4.834	4.664	0.654*
		126.5	0.62*	1.35*	2.538	3.606	4.658	5.062	4.834	4.664	0.654*
		126.6	0.62*	1.35*	2.538	3.606	4.658	5.062	4.934	4.664	0.754*
		126.7	0.62*	1.35*	2.638	3.706	4.658	5.162	4.934	4.664	0.754*
		126.8	0.62*	1.35*	2.638	3.706	4.658	5.062	4.934	4.664	0.754*
		126.9	0.62*	1.35*	2.638	3.706	4.658	5.062	4.934	4.664	0.754*
		127	0.62*	1.35*	2.638	3.706	4.558	5.062	4.934	4.764	0.754*
		127.1	0.62*	1.45*	2.538	3.706	4.558	5.062	4.934	4.864	0.754*
		127.2	0.72*	1.45*	2.538	3.706	4.558	5.062	4.934	4.864	0.754*
		127.3	0.72*	1.45*	2.538	3.706	4.558	5.062	4.934	4.864	0.754*
		127.4	0.72*	1.45*	2.538	3.606	4.558	5.062	4.934	4.864	0.754*
		127.5	0.62*	1.35*	2.538	3.606	4.558	5.062	4.934	4.864	0.754*
		127.6	0.62*	1.35*	2.538	3.606	4.558	5.062	4.934	4.864	0.754*
		127.7	0.62*	1.35*	2.438	3.506	4.458	4.962	4.934	4.864	0.854*
		127.8	0.62*	1.35*	2.438	3.506	4.458	4.962	4.934	4.864	0.854*
		127.9	0.62*	1.35*	2.438	3.606	4.358	4.962	4.834	4.864	0.954*
		128	0.72*	1.35*	2.538	3.706	4.458	4.862	4.934	4.764	0.854*
		128.1	0.72*	1.35*	2.538	3.706	4.558	4.962	4.834	4.664	0.854*
		128.2	0.62*	1.35*	2.638	3.706	4.558	4.962	4.834	4.664	0.854*
		128.3	0.62*	1.35*	2.638	3.706	4.558	4.962	4.834	4.664	0.854*
		128.4	0.62*	1.35*	2.538	3.706	4.558	4.962	4.834	4.764	0.854*
		128.5	0.52*	1.25*	2.538	3.706	4.558	4.962	4.834	4.764	0.854*
		128.6	0.52*	1.25*	2.538	3.706	4.458	4.862	4.834	4.764	0.854*
		128.7	0.52*	1.25*	2.538	3.706	4.458	4.862	4.834	4.764	0.854*
		128.8	0.52*	1.25*	2.538	3.706	4.458	4.862	4.834	4.764	0.854*
		128.9	0.52*	1.25*	2.538	3.706	4.458	4.962	4.734	4.764	0.854*
		129	0.52*	1.25*	2.538	3.606	4.458	4.862	4.734	4.764	0.954*
		129.1	0.52*	1.25*	2.538	3.606	4.458	4.862	4.734	4.764	0.954*
		129.2	0.52*	1.25*	2.438	3.506	4.458	4.862	4.734	4.764	0.954*
		129.3	0.52*	1.25*	2.438	3.506	4.458	4.862	4.834	4.764	0.954*
		129.4	0.52*	1.15*	2.438	3.506	4.458	4.862	4.734	4.664	0.954*
		129.5	0.52*	1.15*	2.438	3.506	4.458	4.862	4.734	4.664	1.054*
		129.6	0.52*	1.15*	2.438	3.506	4.458	4.862	4.734	4.764	0.954*
		129.7	0.62*	1.25*	2.538	3.606	4.458	4.862	4.734	4.764	0.954*
		129.8	0.62*	1.25*	2.538	3.606	4.458	4.862	4.734	4.764	0.954*
		129.9	0.62*	1.35*	2.538	3.606	4.458	4.862	4.634	4.764	0.854*
		130	0.62*	1.35*	2.538	3.606	4.558	4.962	4.634	4.764	0.854*
		130.1	0.62*	1.35*	2.438	3.606	4.458	4.762	4.734	4.764	0.854*
		130.2	0.62*	1.25*	2.438	3.506	4.458	4.762	4.734	4.764	0.854*
		130.3	0.62*	1.25*	2.438	3.506	4.458	4.762	4.734	4.664	0.854*
		130.4	0.62*	1.25*	2.438	3.506	4.458	4.762	4.734	4.664	0.854*
		130.5	0.52*	1.15*	2.438	3.506	4.458	4.762	4.734	4.664	0.854*
		130.6	0.52*	1.15*	2.538	3.606	4.458	4.762	4.734	4.664	0.854*
		130.7	0.52*	1.15*	2.538	3.606	4.458	4.762	4.734	4.664	0.954*
		130.8	0.52*	1.15*	2.538	3.606	4.458	4.862	4.734	4.664	0.954*
		130.9	0.52*	1.15*	2.538	3.606	4.458	4.862	4.734	4.664	0.954*
		131	0.42*	1.15*	2.538	3.606	4.458	4.862	4.634	4.664	0.954*
		131.1	0.52*	1.15*	2.438	3.606	4.458	4.862	4.634	4.664	0.954*
		131.2	0.52*	1.15*	2.438	3.606	4.458	4.762	4.634	4.764	0.954*
		131.3	0.52*	1.15*	2.438	3.606	4.458	4.762	4.634	4.764	0.954*
		131.4	0.62*	1.25*	2.438	3.506	4.458	4.762	4.634	4.764	0.954*
		131.5	0.62*	1.15*	2.438	3.506	4.458	4.762	4.534	4.564	0.954*
		131.6	0.62*	1.15*	2.438	3.506	4.358	4.762	4.534	4.564	1.054*
		131.7	0.62*	1.25*	2.438	3.506	4.458	4.762	4.534	4.564	0.954*
		131.8	0.62*	1.25*	2.438	3.506	4.458	4.762	4.534	4.564	0.954*
		131.9	0.62*	1.25*	2.338	3.506	4.458	4.762	4.534	4.564	1.054*
		132	0.62*	1.25*	2.338	3.506	4.458	4.762	4.534	4.564	1.054*
		132.1	0.62*	1.25*	2.438	3.506	4.458	4.662	4.534	4.564	1.054*
		132.2	0.52*	1.15*	2.438	3.406	4.458	4.662	4.534	4.564	0.954*
		132.3	0.52*	1.15*	2.338	3.306	4.458	4.662	4.534	4.564	0.954*
		132.4	0.52*	1.15*	2.338	3.306	4.458	4.662	4.634	4.564	0.954*
		132.5	0.52*	1.15*	2.338	3.306	4.458	4.662	4.534	4.564	0.954*
		132.6	0.52*	1.15*	2.438	3.406	4.458	4.662	4.534	4.564	0.954*
		132.7	0.52*	1.15*	2.438	3.406	4.358	4.662	4.534	4.664	0.954*
		132.8	0.52*	1.15*	2.438	3.406	4.358	4.662	4.534	4.564	0.954*
		132.9	0.52*	1.15*	2.438	3.406	4.358	4.662	4.534	4.564	0.954*
		133	0.52*	1.15*	2.438	3.406	4.358	4.662	4.534	4.564	1.054*
		133.1	0.52*	1.15*	2.438	3.406	4.358	4.662	4.534	4.564	1.054*
		133.2	0.62*	1.25*	2.438	3.306	4.358	4.662	4.534	4.564	1.054*
		133.3	0.62*	1.15*	2.438	3.306	4.458	4.662	4.534	4.564	1.054*
		133.4	0.62*	1.15*	2.338	3.406	4.358	4.762	4.634	4.664	0.954*
		133.5	0.62*	1.15*	2.338	3.406	4.358	4.662	4.634	4.664	0.954*
		133.6	0.62*	1.15*	2.338	3.406	4.258	4.562	4.634	4.664	0.954*
		133.7	0.62*	1.15*	2.338	3.406	4.258	4.562	4.634	4.664	1.054*
		133.8	0.62*	1.15*	2.338	3.406	4.258	4.562	4.634	4.664	1.054*
		133.9	0.62*	1.15*	2.338	3.406	4.258	4.562	4.534	4.564	1.054*
		134	0.62*	1.15*	2.338	3.406	4.258	4.562	4.434	4.564	1.054*
		134.1	0.62*	1.15*	2.338	3.306	4.258	4.562	4.434	4.564	1.054*
		134.2	0.62*	1.15*	2.538	3.406	4.258	4.562	4.434	4.564	1.054*
		134.3	0.62*	1.15*	2.538	3.406	4.258	4.562	4.434	4.564	0.954*
		134.4	0.62*	1.15*	2.438	3.306	4.258	4.562	4.434	4.464	0.954*
		134.5	0.72*	1.15*	2.438	3.306	4.158	4.462	4.434	4.564	1.054*
		134.6	0.72*	1.15*	2.438	3.306	4.158	4.462	4.434	4.564	1.054*
		134.7	0.72*	1.05*	2.438	3.306	4.158	4.462	4.434	4.564	1.054*
		134.8	0.62*	1.05*	2.438	3.306	4.258	4.562	4.434	4.564	0.954*
		134.9	0.52*	1.05*	2.338	3.306	4.158	4.462	4.434	4.564	0.954*
		135	0.52*	1.05*	2.338	3.306	4.258	4.562	4.434	4.564	0.954*
		135.1	0.52*	1.05*	2.338	3.306	4.358	4.562	4.334	4.564	0.954*
		135.2	0.52*	1.05*	2.338	3.306	4.358	4.562	4.334	4.564	0.954*
		135.3	0.52*	1.05*	2.338	3.306	4.258	4.562	4.334	4.464	0.954*
		135.4	0.62*	1.15*	2.338	3.306	4.158	4.462	4.434	4.464	0.954*
		135.5	0.62*	1.15*	2.338	3.306	4.158	4.462	4.434	4.464	0.954*
		135.6	0.62*	1.15*	2.338	3.306	4.158	4.362	4.434	4.464	1.054*
		135.7	0.62*	1.15*	2.338	3.306	4.158	4.362	4.434	4.464	1.054*
		135.8	0.62*	1.15*	2.438	3.306	4.158	4.362	4.434	4.464	1.054*
		135.9	0.62*	1.15*	2.438	3.306	4.258	4.462	4.434	4.464	1.054*
		136	0.62*	1.15*	2.338	3.306	4.258	4.562	4.534	4.564	1.054*
		136.1	0.62*	1.15*	2.338	3.306	4.258	4.562	4.534	4.564	1.054*
		136.2	0.62*	1.15*	2.338	3.306	4.158	4.562	4.434	4.364	0.954*
		136.3	0.62*	1.25*	2.338	3.306	4.158	4.562	4.434	4.364	0.854*
		136.4	0.62*	1.25*	2.338	3.306	4.158	4.562	4.334	4.364	0.854*
		136.5	0.72*	1.25*	2.338	3.206	4.158	4.562	4.334	4.464	0.854*
		136.6	0.72*	1.25*	2.238	3.106	4.158	4.562	4.334	4.464	0.854*
		136.7	0.62*	1.25*	2.338	3.206	4.158	4.562	4.334	4.464	0.854*
		136.8	0.52*	1.15*	2.338	3.206	4.158	4.462	4.334	4.464	0.854*
		136.9	0.52*	1.15*	2.338	3.206	4.058	4.462	4.334	4.464	0.854*
		137	0.52*	1.15*	2.338	3.206	4.058	4.462	4.334	4.464	0.854*
		137.1	0.52*	1.05*	2.338	3.206	4.058	4.462	4.334	4.464	0.954*
		137.2	0.52*	1.05*	2.338	3.206	4.058	4.462	4.334	4.364	0.954*
		137.3	0.52*	1.05*	2.338	3.306	3.958	4.362	4.334	4.364	0.954*
		137.4	0.52*	1.05*	2.338	3.306	4.058	4.362	4.334	4.364	0.954*
		137.5	0.52*	1.15*	2.338	3.306	4.058	4.362	4.334	4.364	1.054*
		137.6	0.52*	1.15*	2.338	3.206	4.058	4.362	4.334	4.364	1.054*
		137.7	0.62*	1.15*	2.338	3.206	4.058	4.362	4.234	4.364	1.054*
		137.8	0.62*	1.15*	2.338	3.206	4.058	4.262	4.234	4.264	1.054*
		137.9	0.52*	1.15*	2.338	3.206	4.158	4.362	4.334	4.264	1.054*
		138	0.52*	1.15*	2.338	3.206	4.058	4.362	4.334	4.264	1.054*
		138.1	0.52*	1.15*	2.338	3.206	4.058	4.462	4.334	4.264	1.054*
		138.2	0.52*	1.15*	2.338	3.206	4.058	4.362	4.334	4.264	0.954*
		138.3	0.52*	1.15*	2.338	3.206	4.058	4.462	4.334	4.264	0.854*
		138.4	0.62*	1.25*	2.338	3.206	4.058	4.462	4.334	4.264	0.854*
		138.5	0.62*	1.25*	2.338	3.206	4.058	4.462	4.334	4.364	0.854*
		138.6	0.62*	1.25*	2.438	3.306	4.058	4.462	4.334	4.364	0.854*
		138.7	0.62*	1.25*	2.438	3.306	4.058	4.462	4.334	4.364	0.854*
		138.8	0.62*	1.25*	2.438	3.306	4.058	4.362	4.334	4.364	0.854*
		138.9	0.62*	1.25*	2.438	3.306	4.058	4.362	4.334	4.364	0.854*
		139	0.52*	1.05*	2.438	3.306	4.058	4.362	4.334	4.364	0.854*
		139.1	0.52*	1.15*	2.438	3.306	4.058	4.362	4.234	4.264	0.854*
		139.2	0.52*	1.15*	2.338	3.206	3.958	4.362	4.134	4.264	0.854*
		139.3	0.52*	1.15*	2.338	3.206	3.958	4.362	4.134	4.164	0.854*
		139.4	0.52*	1.15*	2.238	3.106	3.858	4.262	4.134	4.164	0.854*
		139.5	0.52*	1.15*	2.238	3.106	3.858	4.262	4.134	4.164	0.854*
		139.6	0.52*	1.15*	2.238	3.206	3.958	4.162	4.134	4.164	0.854*
		139.7	0.52*	1.15*	2.338	3.206	3.958	4.162	4.134	4.164	0.854*
		139.8	0.62*	1.15*	2.338	3.206	3.958	4.162	4.234	4.164	0.854*
		139.9	0.62*	1.15*	2.338	3.206	3.958	4.162	4.234	4.064	0.854*
		140	0.62*	1.15*	2.338	3.206	3.958	4.162	4.334	4.164	0.854*
		140.1	0.62*	1.15*	2.338	3.206	3.958	4.162	4.334	4.164	0.854*
		140.2	0.62*	1.15*	2.338	3.206	3.958	4.162	4.334	4.164	0.854*
		140.3	0.62*	1.15*	2.338	3.206	3.958	4.162	4.334	4.164	0.854*
		140.4	0.62*	1.05*	2.338	3.206	3.958	4.162	4.234	4.164	0.954*
		140.5	0.62*	1.05*	2.238	3.206	3.858	4.162	4.234	4.064	0.954*
		140.6	0.62*	1.15*	2.238	3.106	3.858	4.162	4.234	4.064	0.854*
		140.7	0.72*	1.15*	2.238	3.106	3.858	4.162	4.234	4.064	0.854*
		140.8	0.72*	1.15*	2.238	3.106	3.858	4.262	4.234	4.164	0.854*
		140.9	0.72*	1.15*	2.238	3.106	3.858	4.162	4.234	4.164	0.854*
		141	0.52*	1.05*	2.138	3.006	3.858	4.162	4.234	4.164	0.854*
		141.1	0.52*	1.05*	2.138	3.006	3.858	4.162	4.134	4.064	0.854*
		141.2	0.52*	1.05*	2.138	3.006	3.958	4.162	4.134	3.964	0.854*
		141.3	0.52*	1.15*	2.238	3.106	3.858	4.062	4.034	3.964	0.854*
		141.4	0.62*	1.15*	2.338	3.106	3.858	4.062	4.034	3.964	0.854*
		141.5	0.62*	1.05*	2.338	3.106	3.858	4.062	4.034	3.964	0.854*
		141.6	0.62*	1.05*	2.338	3.106	3.858	4.062	4.034	3.964	0.854*
		141.7	0.62*	1.05*	2.338	3.006	3.858	4.062	4.034	3.964	0.854*
		141.8	0.62*	1.05*	2.338	3.006	3.958	4.162	4.034	3.964	0.854*
		141.9	0.62*	1.05*	2.238	3.006	3.858	4.162	4.034	3.864	0.854*
		142	0.62*	1.05*	2.238	3.106	3.858	4.162	4.034	3.864	0.854*
		142.1	0.62*	1.05*	2.138	3.006	3.858	4.062	4.034	3.964	0.854*
		142.2	0.62*	1.05*	2.138	3.006	3.858	4.162	4.134	3.964	0.854*
		142.3	0.72*	1.15*	2.138	3.006	3.858	4.162	4.134	3.964	0.854*
		142.4	0.72*	1.15*	2.138	3.006	3.858	4.162	4.234	4.064	0.854*
		142.5	0.72*	1.15*	2.138	3.006	3.858	4.162	4.234	4.064	0.854*
		142.6	0.72*	1.05*	2.138	3.006	3.858	4.162	4.134	3.964	0.754*
		142.7	0.72*	1.05*	2.138	3.006	3.858	4.162	4.034	3.864	0.754*
		142.8	0.72*	1.05*	2.138	3.006	3.858	4.162	4.034	3.864	0.754*
		142.9	0.82*	1.05*	2.238	3.106	3.858	4.162	4.034	3.864	0.754*
		143	0.82*	1.05*	2.238	3.106	3.858	4.162	4.034	3.864	0.754*
		143.1	0.82*	1.05*	2.238	3.006	3.858	4.162	4.034	3.864	0.754*
		143.2	0.72*	1.05*	2.238	3.006	3.858	4.062	4.034	3.864	0.754*
		143.3	0.72*	1.05*	2.238	3.006	3.858	4.062	4.034	3.864	0.854*
		143.4	0.62*	0.95*	2.238	3.006	3.858	4.062	4.034	3.864	0.854*
		143.5	0.72*	1.05*	2.138	3.006	3.858	4.062	4.034	3.864	0.854*
		143.6	0.72*	1.15*	2.138	2.906	3.858	4.162	4.034	3.764	0.854*
		143.7	0.72*	1.15*	2.138	2.906	3.758	4.062	3.934	3.864	0.854*
		143.8	0.72*	1.15*	2.138	2.906	3.658	4.062	3.934	3.864	0.854*
		143.9	0.72*	1.15*	2.138	2.906	3.658	4.062	3.934	3.864	0.854*
		144	0.72*	1.15*	2.138	2.906	3.758	4.162	4.034	3.864	0.854*
		144.1	0.72*	1.15*	2.138	2.906	3.758	4.162	4.134	3.964	0.854*
		144.2	0.72*	1.15*	2.138	2.906	3.758	4.162	4.134	3.964	0.854*
		144.3	0.82*	1.05*	2.138	2.906	3.758	4.162	4.134	3.964	0.854*
		144.4	0.82*	1.05*	2.138	3.006	3.758	4.162	4.134	3.964	0.754*
		144.5	0.82*	1.05*	2.138	3.006	3.858	4.162	3.934	3.864	0.654*
		144.6	0.82*	1.05*	2.238	3.006	3.858	4.162	3.934	3.864	0.754*
		144.7	0.72*	1.05*	2.238	3.006	3.858	4.162	3.934	3.864	0.754*
		144.8	0.72*	1.05*	2.238	3.006	3.858	4.162	3.934	3.764	0.754*
		144.9	0.62*	0.95*	2.238	3.006	3.858	4.062	3.934	3.764	0.754*
		145	0.62*	0.95*	2.238	3.006	3.858	4.162	4.034	3.864	0.754*
		145.1	0.72*	1.05*	2.338	3.006	3.858	4.162	4.034	3.864	0.754*
		145.2	0.72*	1.05*	2.338	3.006	3.758	4.162	4.034	3.864	0.754*
		145.3	0.72*	1.05*	2.338	3.006	3.758	4.162	3.934	3.864	0.854*
		145.4	0.72*	1.05*	2.238	3.006	3.758	4.162	3.934	3.864	0.854*
		145.5	0.72*	1.15*	2.238	3.006	3.758	4.162	3.934	3.864	0.754*
		145.6	0.82*	1.15*	2.238	3.006	3.758	4.162	3.934	3.964	0.754*
		145.7	0.82*	1.15*	2.138	2.906	3.758	4.162	3.934	3.964	0.754*
		145.8	0.82*	1.15*	2.138	2.906	3.758	4.162	3.934	3.964	0.754*
		145.9	0.82*	1.15*	2.138	2.906	3.758	4.162	4.034	3.964	0.654*
		146	0.82*	1.15*	2.138	2.906	3.758	4.162	4.034	3.964	0.654*
		146.1	0.82*	1.15*	2.138	2.906	3.758	4.162	4.034	3.964	0.654*
		146.2	0.72*	1.05*	2.138	3.006	3.758	4.262	3.934	3.964	0.654*
		146.3	0.62*	1.05*	2.138	3.006	3.758	4.262	3.934	3.964	0.654*
		146.4	0.62*	0.95*	2.138	3.006	3.758	4.262	3.934	3.964	0.654*
		146.5	0.62*	0.95*	2.138	3.006	3.758	4.162	3.934	3.964	0.654*
		146.6	0.62*	0.95*	2.138	3.006	3.758	4.062	3.934	3.964	0.654*
		146.7	0.62*	0.95*	2.138	2.906	3.758	4.062	3.934	3.964	0.654*
		146.8	0.62*	0.95*	2.138	2.906	3.758	4.062	3.934	3.864	0.654*
		146.9	0.72*	1.05*	2.238	2.906	3.758	4.062	3.934	3.864	0.654*
		147	0.72*	1.15*	2.238	2.906	3.758	4.162	4.034	3.864	0.754*
		147.1	0.72*	1.15*	2.238	2.906	3.758	4.162	4.034	3.864	0.754*
		147.2	0.82*	1.15*	2.238	2.906	3.758	4.162	4.034	3.864	0.754*
		147.3	0.82*	1.15*	2.138	2.906	3.758	4.162	4.034	3.864	0.854*
		147.4	0.82*	1.15*	2.138	2.906	3.758	4.162	4.034	3.864	0.854*
		147.5	0.82*	1.15*	2.138	2.906	3.758	4.162	3.934	3.964	0.754*
		147.6	0.72*	1.05*	2.138	2.906	3.758	4.162	3.934	3.964	0.754*
		147.7	0.72*	1.05*	2.138	2.906	3.758	4.162	3.934	3.964	0.754*
		147.8	0.62*	1.05*	2.138	2.906	3.758	4.162	3.934	3.964	0.754*
		147.9	0.62*	1.05*	2.138	2.906	3.658	4.162	4.034	4.064	0.754*
		148	0.62*	1.05*	2.138	2.906	3.658	4.162	3.934	3.964	0.754*
		148.1	0.62*	1.05*	2.138	2.906	3.558	4.062	4.034	3.964	0.754*
		148.2	0.62*	1.05*	2.138	3.006	3.558	4.062	4.034	3.964	0.754*
		148.3	0.62*	1.05*	2.038	3.006	3.558	4.062	4.034	3.964	0.754*
		148.4	0.62*	1.05*	2.138	3.006	3.658	4.062	4.034	3.964	0.654*
		148.5	0.62*	0.95*	2.138	3.006	3.658	4.062	3.934	3.964	0.654*
		148.6	0.62*	0.95*	2.138	3.006	3.658	4.062	3.934	3.964	0.654*
		148.7	0.62*	0.95*	2.138	2.906	3.658	4.062	3.934	3.964	0.654*
		148.8	0.72*	0.95*	2.138	2.906	3.658	4.062	3.934	3.964	0.654*
		148.9	0.72*	0.95*	2.138	2.906	3.658	4.062	3.934	3.964	0.554*
		149	0.72*	0.95*	2.138	2.906	3.758	4.062	3.934	3.964	0.654*
		149.1	0.72*	1.05*	2.138	2.906	3.758	4.062	3.934	3.964	0.654*
		149.2	0.62*	0.95*	2.138	2.906	3.658	4.062	3.934	3.964	0.654*
		149.3	0.62*	0.95*	2.138	2.906	3.658	4.062	3.934	3.964	0.654*
		149.4	0.62*	0.95*	2.138	2.906	3.658	4.062	4.034	3.864	0.654*
		149.5	0.52*	0.95*	2.138	2.906	3.658	4.062	4.034	3.864	0.654*
		149.6	0.52*	0.95*	2.138	2.906	3.658	3.962	4.034	3.964	0.654*
		149.7	0.62*	1.05*	2.038	2.806	3.658	4.062	3.934	3.964	0.654*
		149.8	0.62*	1.05*	2.038	2.906	3.658	4.062	3.934	3.964	0.754*
[truncated: 5,501 more rows]

## Sheet: Figure_3_B
		Time	3.9063	7.8125	15.6250	31.2500	62.5	125	250	500 nM	3.91
		-50	0.232*	-0.124*	-0.14*	0.044*	0.056	0.056	-0.22	-0.226	-0.104*
		-49.9	0.232*	-0.124*	-0.14*	-0.056*	0.056	0.056	-0.12	-0.126	-0.104*
		-49.8	0.432*	-0.024*	-0.14*	-0.056*	0.056	0.056	-0.12	-0.126	-0.204*
		-49.7	0.432*	-0.024*	-0.14*	-0.056*	0.056	-0.044	-0.12	-0.226	-0.204*
		-49.6	0.332*	-0.124*	-0.14*	-0.056*	0.056	0.056	-0.12	-0.226	-0.204*
		-49.5	0.332*	-0.124*	-0.24*	-0.156*	-0.044	-0.044	-0.12	-0.126	-0.204*
		-49.4	0.332*	-0.124*	-0.14*	-0.156*	-0.044	-0.044	-0.12	-0.126	-0.204*
		-49.3	0.332*	-0.124*	-0.14*	-0.156*	-0.044	-0.044	-0.12	-0.126	-0.204*
		-49.2	0.332*	-0.124*	-0.04*	-0.056*	-0.044	0.056	-0.02	-0.126	-0.304*
		-49.1	0.332*	-0.124*	-0.04*	-0.056*	0.056	0.156	0.08	-0.026	-0.304*
		-49	0.332*	-0.124*	-0.04*	-0.156*	0.156	0.156	0.08	0.074	-0.304*
		-48.9	0.332*	-0.124*	-0.04*	-0.156*	0.056	0.056	-0.02	-0.026	-0.104*
		-48.8	0.332*	-0.124*	-0.04*	-0.056*	0.056	0.056	0.08	-0.026	-0.104*
		-48.7	0.332*	-0.024*	-0.04*	-0.056*	0.056	-0.044	0.08	-0.026	-0.204*
		-48.6	0.432*	-0.024*	-0.24*	-0.156*	-0.044	0.056	-0.02	-0.126	-0.204*
		-48.5	0.232*	-0.224*	-0.14*	-0.056*	-0.044	0.056	-0.02	-0.026	-0.304*
		-48.4	0.332*	-0.124*	-0.04*	-0.056*	0.156	0.156	-0.02	-0.026	-0.304*
		-48.3	0.332*	-0.124*	-0.04*	-0.056*	0.056	0.056	0.08	-0.026	-0.304*
		-48.2	0.332*	-0.124*	-0.14*	-0.056*	0.056	0.156	-0.02	-0.126	-0.304*
		-48.1	0.332*	-0.024*	-0.04*	-0.156*	0.056	0.156	0.08	0.074	-0.304*
		-48	0.332*	-0.124*	-0.04*	-0.156*	0.056	0.156	0.08	0.074	-0.304*
		-47.9	0.432*	-0.024*	-0.04*	-0.156*	0.056	0.156	-0.02	0.074	-0.304*
		-47.8	0.432*	-0.024*	-0.04*	-0.156*	-0.044	0.056	0.08	0.074	-0.204*
		-47.7	0.432*	-0.024*	-0.04*	-0.156*	0.056	0.056	0.08	0.074	-0.204*
		-47.6	0.332*	-0.024*	0.06*	-0.056*	0.156	0.156	-0.02	-0.026	-0.204*
		-47.5	0.232*	-0.124*	-0.04*	-0.056*	0.156	0.156	-0.02	-0.026	-0.204*
		-47.4	0.332*	-0.124*	-0.04*	-0.056*	0.056	0.056	0.08	-0.026	-0.304*
		-47.3	0.432*	-0.024*	0.06*	0.044*	0.056	0.056	0.08	-0.026	-0.304*
		-47.2	0.432*	-0.024*	-0.04*	-0.056*	0.056	0.156	0.08	0.074	-0.304*
		-47.1	0.332*	-0.024*	-0.04*	-0.056*	0.056	0.156	0.18	0.174	-0.304*
		-47	0.332*	-0.024*	-0.04*	-0.156*	0.056	0.156	0.18	0.074	-0.304*
		-46.9	0.332*	-0.024*	0.06*	-0.156*	0.056	0.156	0.18	0.074	-0.304*
		-46.8	0.332*	0.076*	0.06*	-0.056*	0.156	0.356	0.28	0.074	-0.204*
		-46.7	0.432*	0.176*	-0.04*	-0.156*	0.156	0.156	0.18	0.074	-0.204*
		-46.6	0.332*	0.076*	-0.04*	-0.156*	0.156	0.156	0.18	0.074	-0.204*
		-46.5	0.332*	-0.024*	0.06*	-0.056*	0.156	0.156	0.18	0.074	-0.204*
		-46.4	0.332*	0.076*	0.16*	0.044*	0.156	0.156	0.08	0.074	-0.204*
		-46.3	0.332*	0.076*	0.06*	0.044*	-0.044	0.156	-0.02	-0.026	-0.204*
		-46.2	0.232*	-0.024*	0.06*	0.044*	0.056	0.156	-0.02	0.074	-0.304*
		-46.1	0.332*	0.076*	-0.04*	-0.056*	0.056	0.156	0.18	0.174	-0.304*
		-46	0.432*	0.076*	0.06*	0.044*	0.056	0.156	0.18	0.074	-0.304*
		-45.9	0.432*	0.176*	-0.04*	-0.056*	0.056	0.056	0.18	0.074	-0.304*
		-45.8	0.432*	0.176*	-0.04*	-0.056*	0.056	0.056	0.08	-0.026	-0.304*
		-45.7	0.432*	0.176*	-0.04*	-0.056*	0.256	0.256	0.08	-0.026	-0.404*
		-45.6	0.332*	0.076*	-0.04*	-0.056*	0.056	0.156	-0.02	-0.026	-0.404*
		-45.5	0.332*	0.176*	-0.04*	-0.056*	0.056	0.156	-0.02	0.074	-0.404*
		-45.4	0.332*	0.076*	0.06*	0.044*	0.056	0.056	-0.02	0.074	-0.304*
		-45.3	0.332*	0.176*	0.06*	0.144*	0.056	0.056	0.08	-0.026	-0.304*
		-45.2	0.232*	0.076*	0.06*	-0.056*	0.056	0.056	0.18	0.074	-0.304*
		-45.1	0.232*	0.076*	0.06*	-0.056*	0.056	0.056	0.08	-0.026	-0.204*
		-45	0.332*	0.176*	0.06*	-0.056*	-0.044	-0.044	0.08	0.074	-0.204*
		-44.9	0.332*	0.176*	0.06*	0.044*	0.156	0.056	0.08	0.074	-0.204*
		-44.8	0.232*	0.176*	-0.14*	-0.056*	0.056	0.156	-0.12	-0.026	-0.204*
		-44.7	0.232*	0.176*	0.06*	0.044*	0.056	0.156	-0.02	-0.026	-0.304*
		-44.6	0.332*	0.176*	-0.04*	-0.056*	0.156	0.056	0.08	-0.026	-0.304*
		-44.5	0.332*	0.076*	-0.04*	-0.156*	0.056	0.056	0.08	0.074	-0.204*
		-44.4	0.232*	0.076*	-0.04*	-0.156*	0.056	0.056	-0.02	-0.026	-0.204*
		-44.3	0.332*	0.076*	-0.04*	-0.056*	0.056	0.056	0.08	-0.026	-0.304*
		-44.2	0.332*	0.076*	-0.04*	-0.156*	-0.044	0.156	0.08	0.074	-0.204*
		-44.1	0.332*	0.176*	0.06*	-0.056*	-0.044	0.156	0.08	-0.026	-0.204*
		-44	0.332*	0.176*	-0.04*	-0.056*	0.056	0.156	0.08	-0.026	-0.204*
		-43.9	0.332*	0.176*	-0.14*	-0.156*	0.056	0.156	0.08	-0.026	-0.104*
		-43.8	0.332*	0.176*	-0.14*	-0.156*	0.056	0.156	-0.02	-0.026	-0.104*
		-43.7	0.332*	0.076*	-0.24*	-0.256*	0.056	0.156	-0.02	-0.026	-0.304*
		-43.6	0.432*	0.176*	-0.14*	-0.156*	-0.044	0.156	-0.02	0.074	-0.304*
		-43.5	0.432*	0.076*	-0.04*	-0.056*	0.056	0.156	0.08	-0.026	-0.304*
		-43.4	0.432*	0.076*	-0.24*	-0.256*	0.056	0.156	0.08	0.074	-0.304*
		-43.3	0.432*	0.276*	-0.24*	-0.256*	-0.044	0.056	-0.02	-0.026	-0.304*
		-43.2	0.432*	0.176*	-0.24*	-0.256*	0.056	0.056	0.08	0.074	-0.204*
		-43.1	0.432*	0.276*	-0.24*	-0.356*	0.056	0.056	-0.02	0.074	-0.204*
		-43	0.432*	0.276*	-0.24*	-0.256*	-0.044	0.056	0.08	-0.026	-0.204*
		-42.9	0.432*	0.276*	-0.14*	-0.256*	0.056	0.156	0.08	-0.026	-0.204*
		-42.8	0.232*	0.076*	-0.14*	-0.256*	0.056	0.156	0.08	0.074	-0.304*
		-42.7	0.232*	0.076*	-0.14*	-0.156*	0.056	0.056	0.08	0.074	-0.204*
		-42.6	0.432*	0.176*	-0.14*	-0.156*	0.056	0.056	0.08	0.074	-0.204*
		-42.5	0.432*	0.276*	-0.14*	-0.156*	0.056	0.056	0.08	0.174	-0.204*
		-42.4	0.432*	0.276*	-0.04*	-0.256*	0.056	0.056	-0.02	-0.026	-0.204*
		-42.3	0.432*	0.176*	-0.04*	-0.156*	0.056	0.056	-0.02	-0.026	-0.204*
		-42.2	0.232*	0.076*	-0.24*	-0.256*	0.056	0.156	-0.02	-0.026	-0.304*
		-42.1	0.232*	0.076*	-0.14*	-0.256*	0.156	0.156	-0.02	-0.026	-0.304*
		-42	0.332*	0.176*	-0.04*	-0.156*	0.156	0.256	0.08	0.074	-0.204*
		-41.9	0.332*	0.176*	-0.04*	-0.156*	0.156	0.156	0.08	0.174	-0.104*
		-41.8	0.332*	0.176*	-0.04*	-0.056*	0.056	0.056	0.08	0.174	-0.104*
		-41.7	0.332*	0.276*	-0.04*	-0.056*	0.156	0.056	0.08	0.074	-0.204*
		-41.6	0.332*	0.276*	0.06*	-0.056*	0.156	0.056	0.08	0.074	-0.204*
		-41.5	0.232*	0.276*	-0.04*	-0.256*	0.156	0.156	0.08	0.074	-0.204*
		-41.4	0.332*	0.276*	-0.04*	-0.256*	0.056	0.056	0.08	0.074	-0.204*
		-41.3	0.232*	0.176*	-0.04*	-0.156*	0.056	0.056	-0.02	0.074	-0.204*
		-41.2	0.232*	0.076*	0.06*	-0.156*	-0.044	0.056	-0.02	0.074	-0.204*
		-41.1	0.232*	0.076*	-0.04*	-0.156*	0.156	0.156	-0.02	-0.026	-0.304*
		-41	0.332*	0.176*	0.06*	-0.056*	0.156	0.056	-0.02	-0.026	-0.204*
		-40.9	0.332*	0.076*	-0.04*	-0.156*	0.156	0.156	-0.02	0.074	-0.204*
		-40.8	0.332*	0.076*	-0.04*	-0.156*	0.056	0.056	-0.02	0.074	-0.304*
		-40.7	0.332*	0.176*	0.06*	-0.056*	0.056	0.056	0.08	0.074	-0.304*
		-40.6	0.332*	0.176*	0.06*	-0.056*	0.156	0.056	-0.02	-0.126	-0.304*
		-40.5	0.332*	0.176*	0.06*	-0.056*	0.156	0.056	-0.02	-0.026	-0.304*
		-40.4	0.332*	0.076*	-0.04*	-0.056*	0.156	-0.044	-0.02	-0.026	-0.304*
		-40.3	0.232*	-0.024*	-0.04*	-0.056*	0.056	-0.144	-0.02	0.074	-0.304*
		-40.2	0.232*	-0.024*	-0.04*	-0.256*	-0.044	-0.044	0.08	0.074	-0.304*
		-40.1	0.232*	-0.024*	-0.04*	-0.256*	-0.044	-0.044	0.08	0.074	-0.304*
		-40	0.332*	0.076*	-0.04*	-0.156*	-0.044	-0.044	0.08	0.074	-0.304*
		-39.9	0.232*	0.076*	-0.04*	-0.156*	-0.044	-0.044	0.08	0.074	-0.304*
		-39.8	0.232*	0.076*	-0.04*	-0.156*	-0.044	-0.244	-0.02	-0.026	-0.304*
		-39.7	0.232*	0.076*	-0.04*	-0.156*	0.056	-0.144	0.08	-0.026	-0.304*
		-39.6	0.332*	0.076*	0.06*	-0.156*	0.056	-0.044	0.08	-0.026	-0.304*
		-39.5	0.332*	0.076*	-0.04*	-0.156*	0.056	-0.044	-0.02	-0.026	-0.204*
		-39.4	0.332*	-0.024*	-0.04*	-0.156*	0.056	-0.044	-0.02	0.074	-0.304*
		-39.3	0.332*	0.076*	-0.04*	-0.056*	0.056	-0.044	0.08	0.174	-0.304*
		-39.2	0.332*	0.076*	-0.04*	-0.056*	0.156	-0.044	0.08	-0.026	-0.304*
		-39.1	0.232*	-0.024*	-0.04*	-0.056*	0.056	-0.244	0.08	-0.026	-0.304*
		-39	0.332*	0.076*	-0.04*	-0.056*	-0.044	-0.244	0.08	-0.026	-0.304*
		-38.9	0.332*	0.076*	-0.14*	-0.056*	-0.044	-0.244	0.08	-0.026	-0.304*
		-38.8	0.332*	0.076*	-0.14*	-0.156*	-0.044	-0.244	0.08	-0.026	-0.304*
		-38.7	0.332*	0.076*	-0.14*	-0.256*	-0.044	-0.144	0.08	-0.026	-0.304*
		-38.6	0.332*	0.076*	-0.14*	-0.156*	0.156	-0.044	0.08	-0.026	-0.304*
		-38.5	0.332*	-0.024*	-0.14*	-0.156*	0.156	-0.144	0.18	0.074	-0.304*
		-38.4	0.332*	0.076*	-0.04*	-0.056*	0.056	-0.244	0.18	0.074	-0.404*
		-38.3	0.232*	-0.024*	-0.14*	-0.056*	0.056	-0.244	-0.02	-0.026	-0.304*
		-38.2	0.332*	0.076*	-0.14*	-0.056*	0.056	-0.144	0.08	0.074	-0.304*
		-38.1	0.432*	0.076*	-0.14*	-0.056*	0.056	-0.144	0.08	0.074	-0.304*
		-38	0.432*	0.076*	-0.14*	-0.156*	-0.044	-0.144	0.08	0.074	-0.304*
		-37.9	0.432*	0.176*	-0.14*	-0.156*	0.056	-0.144	0.18	0.074	-0.304*
		-37.8	0.432*	0.176*	-0.14*	-0.156*	0.056	-0.144	0.18	-0.026	-0.304*
		-37.7	0.432*	0.176*	-0.24*	-0.056*	0.056	-0.144	0.18	-0.026	-0.304*
		-37.6	0.332*	-0.024*	-0.24*	-0.056*	0.056	-0.144	0.18	0.074	-0.204*
		-37.5	0.332*	-0.024*	-0.24*	-0.056*	-0.044	-0.244	0.18	0.074	-0.204*
		-37.4	0.332*	0.076*	-0.24*	-0.056*	-0.044	-0.244	0.18	0.074	-0.204*
		-37.3	0.332*	0.076*	-0.24*	-0.056*	0.056	-0.244	0.18	0.074	-0.304*
		-37.2	0.432*	0.076*	-0.24*	-0.156*	0.156	-0.144	0.28	0.074	-0.404*
		-37.1	0.432*	0.176*	-0.24*	-0.156*	0.156	-0.144	0.28	0.074	-0.404*
		-37	0.432*	0.176*	-0.24*	-0.156*	0.056	-0.144	0.18	0.074	-0.304*
		-36.9	0.432*	0.176*	-0.24*	-0.156*	0.056	-0.044	0.18	0.074	-0.204*
		-36.8	0.432*	0.176*	-0.24*	-0.156*	-0.044	-0.144	0.18	0.074	-0.204*
		-36.7	0.332*	0.076*	-0.24*	-0.056*	-0.044	-0.144	0.18	-0.026	-0.204*
		-36.6	0.332*	-0.024*	-0.34*	-0.056*	-0.044	-0.144	0.18	0.074	-0.204*
		-36.5	0.432*	0.076*	-0.34*	-0.056*	-0.044	-0.144	0.18	0.074	-0.304*
		-36.4	0.432*	0.076*	-0.24*	0.044*	0.056	-0.244	0.18	0.074	-0.304*
		-36.3	0.432*	0.076*	-0.14*	0.044*	0.056	-0.244	0.08	-0.026	-0.404*
		-36.2	0.432*	0.076*	-0.24*	-0.156*	0.056	-0.244	0.08	-0.026	-0.404*
		-36.1	0.432*	0.076*	-0.24*	-0.156*	-0.144	-0.344	0.18	-0.026	-0.304*
		-36	0.332*	-0.024*	-0.24*	-0.156*	-0.144	-0.344	0.18	-0.026	-0.304*
		-35.9	0.332*	-0.024*	-0.24*	-0.156*	-0.144	-0.344	0.18	0.074	-0.304*
		-35.8	0.332*	-0.024*	-0.24*	-0.156*	-0.144	-0.344	0.08	0.074	-0.204*
		-35.7	0.332*	-0.024*	-0.24*	-0.156*	-0.044	-0.144	0.08	0.074	-0.304*
		-35.6	0.332*	-0.024*	-0.24*	-0.056*	-0.044	-0.144	0.08	0.074	-0.304*
		-35.5	0.332*	-0.024*	-0.24*	-0.056*	-0.044	-0.144	0.08	0.074	-0.304*
		-35.4	0.432*	0.176*	-0.24*	-0.056*	-0.044	-0.144	0.18	0.174	-0.304*
		-35.3	0.432*	0.176*	-0.34*	-0.156*	-0.044	-0.144	0.28	0.174	-0.304*
		-35.2	0.432*	0.176*	-0.34*	-0.156*	-0.044	-0.244	0.18	-0.026	-0.304*
		-35.1	0.332*	0.076*	-0.24*	-0.056*	-0.044	-0.244	0.18	-0.026	-0.304*
		-35	0.432*	0.076*	-0.24*	-0.056*	-0.044	-0.244	0.18	-0.026	-0.304*
		-34.9	0.432*	0.076*	-0.24*	-0.056*	-0.044	-0.244	0.18	0.074	-0.304*
		-34.8	0.332*	0.076*	-0.24*	-0.056*	-0.044	-0.244	0.18	0.074	-0.204*
		-34.7	0.332*	0.076*	-0.24*	-0.056*	-0.044	-0.244	0.18	0.074	-0.104*
		-34.6	0.332*	0.076*	-0.24*	0.044*	-0.044	-0.144	0.18	0.074	-0.304*
		-34.5	0.332*	0.076*	-0.24*	0.044*	-0.044	-0.144	0.18	0.074	-0.304*
		-34.4	0.332*	0.076*	-0.14*	0.044*	-0.144	-0.144	0.08	-0.026	-0.304*
		-34.3	0.332*	0.076*	-0.24*	-0.056*	-0.144	-0.144	0.08	-0.026	-0.304*
		-34.2	0.332*	0.076*	-0.24*	-0.056*	-0.144	-0.144	0.18	-0.026	-0.304*
		-34.1	0.332*	0.176*	-0.24*	-0.056*	-0.044	-0.144	0.18	-0.026	-0.304*
		-34	0.332*	0.176*	-0.24*	-0.056*	-0.044	-0.144	0.18	0.074	-0.204*
		-33.9	0.432*	0.176*	-0.24*	0.044*	-0.044	-0.144	0.18	0.074	-0.204*
		-33.8	0.432*	0.176*	-0.24*	0.044*	-0.044	-0.144	0.18	0.174	-0.204*
		-33.7	0.432*	0.176*	-0.24*	0.044*	-0.044	-0.144	0.18	0.174	-0.204*
		-33.6	0.332*	0.076*	-0.34*	-0.056*	-0.044	-0.144	0.08	0.074	-0.204*
		-33.5	0.332*	0.176*	-0.34*	-0.056*	-0.044	-0.144	0.08	0.074	-0.304*
		-33.4	0.332*	0.176*	-0.34*	-0.156*	-0.144	-0.244	0.08	0.074	-0.304*
		-33.3	0.332*	0.176*	-0.34*	-0.156*	-0.144	-0.244	0.08	0.074	-0.304*
		-33.2	0.332*	0.176*	-0.24*	-0.156*	-0.144	-0.244	0.18	-0.026	-0.304*
		-33.1	0.332*	0.176*	-0.24*	-0.056*	-0.144	-0.244	0.18	0.074	-0.404*
		-33	0.332*	0.176*	-0.34*	-0.056*	-0.144	-0.244	0.18	0.074	-0.404*
		-32.9	0.332*	0.076*	-0.34*	-0.056*	-0.144	-0.244	0.18	0.074	-0.404*
		-32.8	0.432*	0.176*	-0.44*	-0.156*	-0.044	-0.244	0.18	0.074	-0.304*
		-32.7	0.432*	0.176*	-0.44*	-0.156*	-0.044	-0.244	0.08	0.074	-0.304*
		-32.6	0.332*	0.176*	-0.44*	-0.156*	-0.044	-0.144	0.08	0.174	-0.304*
		-32.5	0.332*	0.176*	-0.44*	-0.156*	-0.044	-0.144	-0.02	0.074	-0.204*
		-32.4	0.432*	0.176*	-0.34*	-0.156*	-0.044	-0.144	-0.02	0.074	-0.204*
		-32.3	0.432*	0.176*	-0.34*	-0.156*	-0.044	-0.144	-0.02	0.074	-0.204*
		-32.2	0.432*	0.176*	-0.44*	-0.256*	-0.044	-0.144	-0.02	0.074	-0.104*
		-32.1	0.432*	0.176*	-0.34*	-0.056*	-0.044	-0.144	0.08	0.174	-0.204*
		-32	0.332*	0.176*	-0.34*	-0.056*	-0.044	-0.144	0.18	0.174	-0.204*
		-31.9	0.232*	0.076*	-0.34*	-0.156*	-0.044	-0.144	0.08	0.074	-0.204*
		-31.8	0.232*	0.076*	-0.34*	-0.156*	-0.044	-0.244	0.08	-0.026	-0.304*
		-31.7	0.232*	0.076*	-0.34*	-0.156*	-0.044	-0.244	0.08	-0.026	-0.304*
		-31.6	0.232*	0.076*	-0.34*	-0.156*	-0.044	-0.144	0.08	0.074	-0.304*
		-31.5	0.332*	0.076*	-0.24*	-0.156*	-0.144	-0.244	0.08	0.074	-0.304*
		-31.4	0.332*	0.076*	-0.34*	-0.256*	-0.144	-0.244	0.08	0.074	-0.204*
		-31.3	0.332*	0.076*	-0.34*	-0.256*	-0.144	-0.244	-0.02	0.074	-0.204*
		-31.2	0.332*	0.076*	-0.34*	-0.256*	-0.044	-0.144	-0.02	0.074	-0.204*
		-31.1	0.332*	0.076*	-0.34*	-0.256*	-0.044	-0.144	-0.02	0.074	-0.204*
		-31	0.232*	0.076*	-0.34*	-0.256*	-0.044	-0.144	-0.12	-0.026	-0.304*
		-30.9	0.132*	0.076*	-0.34*	-0.256*	-0.044	-0.144	-0.02	-0.026	-0.304*
		-30.8	0.132*	0.076*	-0.44*	-0.256*	-0.044	-0.144	-0.02	-0.026	-0.304*
		-30.7	0.132*	0.076*	-0.34*	-0.156*	-0.044	-0.044	-0.02	-0.026	-0.304*
		-30.6	0.132*	0.076*	-0.24*	-0.156*	-0.144	-0.144	-0.02	0.074	-0.204*
		-30.5	0.232*	0.076*	-0.24*	-0.156*	-0.144	-0.144	-0.02	-0.026	-0.304*
		-30.4	0.332*	0.076*	-0.24*	-0.156*	-0.044	-0.244	-0.02	-0.026	-0.204*
		-30.3	0.332*	0.076*	-0.34*	-0.256*	-0.044	-0.244	-0.02	-0.026	-0.204*
		-30.2	0.332*	0.076*	-0.34*	-0.256*	-0.144	-0.244	-0.02	-0.026	-0.204*
		-30.1	0.232*	-0.024*	-0.34*	-0.256*	-0.144	-0.144	-0.12	-0.026	-0.104*
		-30	0.232*	-0.024*	-0.34*	-0.256*	-0.144	-0.144	-0.12	-0.026	-0.204*
		-29.9	0.232*	-0.024*	-0.24*	-0.256*	-0.044	-0.044	-0.22	-0.126	-0.204*
		-29.8	0.232*	-0.024*	-0.24*	-0.156*	-0.144	-0.144	-0.22	-0.126	-0.204*
		-29.7	0.232*	-0.024*	-0.24*	-0.256*	-0.144	-0.144	-0.22	-0.026	-0.204*
		-29.6	0.232*	0.076*	-0.14*	-0.156*	-0.144	-0.144	-0.12	-0.026	-0.204*
		-29.5	0.232*	0.076*	-0.14*	-0.156*	-0.044	-0.144	-0.12	-0.026	-0.204*
		-29.4	0.232*	0.076*	-0.14*	-0.156*	-0.044	-0.044	-0.12	-0.126	-0.304*
		-29.3	0.232*	0.076*	-0.14*	-0.156*	-0.044	-0.044	-0.12	-0.126	-0.204*
		-29.2	0.132*	0.076*	-0.24*	-0.256*	0.056	-0.044	-0.12	-0.126	-0.204*
		-29.1	0.132*	0.176*	-0.14*	-0.256*	0.056	-0.044	-0.22	-0.126	-0.304*
		-29	0.232*	0.176*	-0.14*	-0.256*	0.056	-0.044	-0.22	-0.126	-0.304*
		-28.9	0.232*	0.176*	-0.14*	-0.256*	-0.144	-0.144	-0.22	-0.126	-0.204*
		-28.8	0.232*	0.076*	-0.14*	-0.156*	-0.044	-0.044	-0.22	-0.126	-0.204*
		-28.7	0.232*	0.076*	-0.14*	-0.156*	-0.044	-0.044	-0.22	-0.126	-0.204*
		-28.6	0.232*	0.076*	-0.14*	-0.256*	-0.044	-0.044	-0.22	-0.126	-0.104*
		-28.5	0.132*	-0.024*	-0.04*	-0.256*	-0.044	-0.044	-0.22	-0.226	-0.104*
		-28.4	0.132*	-0.024*	0.06*	-0.156*	-0.044	-0.044	-0.12	-0.126	-0.204*
		-28.3	0.232*	0.176*	-0.14*	-0.256*	-0.044	-0.044	-0.22	-0.126	-0.204*
		-28.2	0.232*	0.176*	-0.14*	-0.256*	-0.044	-0.044	-0.22	-0.126	-0.204*
		-28.1	0.232*	0.176*	-0.14*	-0.156*	-0.044	-0.044	-0.12	-0.126	-0.204*
		-28	0.232*	0.176*	-0.14*	-0.156*	0.056	0.056	-0.12	-0.126	-0.104*
		-27.9	0.132*	0.176*	-0.14*	-0.156*	0.056	0.056	-0.12	-0.026	-0.204*
		-27.8	0.232*	0.176*	-0.04*	-0.156*	0.056	0.056	-0.12	-0.026	-0.304*
		-27.7	0.232*	0.176*	0.06*	-0.156*	0.056	0.056	-0.22	-0.126	-0.204*
		-27.6	0.132*	0.076*	0.06*	-0.156*	-0.044	0.056	-0.22	-0.126	-0.204*
		-27.5	0.132*	0.076*	-0.04*	-0.256*	-0.044	-0.044	-0.22	-0.126	-0.204*
		-27.4	0.132*	0.076*	-0.04*	-0.256*	-0.044	-0.044	-0.22	-0.126	-0.204*
		-27.3	0.232*	0.176*	-0.04*	-0.156*	0.056	0.056	-0.22	-0.126	-0.204*
		-27.2	0.332*	0.276*	-0.04*	-0.156*	0.056	0.056	-0.12	-0.126	-0.104*
		-27.1	0.332*	0.276*	-0.04*	-0.156*	-0.044	-0.044	-0.12	-0.026	-0.204*
		-27	0.332*	0.276*	0.06*	-0.156*	-0.044	-0.044	-0.12	-0.026	-0.204*
		-26.9	0.232*	0.176*	0.06*	-0.256*	-0.044	-0.044	-0.22	-0.126	-0.204*
		-26.8	0.232*	0.176*	0.06*	-0.156*	-0.044	-0.044	-0.12	-0.126	-0.104*
		-26.7	0.232*	0.276*	-0.04*	-0.256*	-0.044	0.056	-0.12	-0.126	-0.204*
		-26.6	0.132*	0.276*	-0.04*	-0.256*	0.056	0.156	-0.12	-0.126	-0.104*
		-26.5	0.332*	0.276*	-0.04*	-0.156*	0.056	0.156	-0.12	-0.126	-0.104*
		-26.4	0.232*	0.176*	-0.04*	-0.156*	0.056	0.056	-0.02	-0.026	-0.204*
		-26.3	0.232*	0.176*	-0.04*	-0.156*	-0.044	-0.044	-0.02	-0.026	-0.204*
		-26.2	0.232*	0.276*	0.06*	-0.156*	-0.044	-0.044	-0.02	-0.026	-0.204*
		-26.1	0.232*	0.276*	0.06*	-0.156*	-0.044	0.056	-0.12	-0.126	-0.204*
		-26	0.332*	0.276*	0.06*	-0.156*	-0.044	0.056	-0.12	-0.126	-0.104*
		-25.9	0.332*	0.376*	-0.04*	-0.156*	0.056	0.056	-0.12	-0.126	-0.104*
		-25.8	0.332*	0.376*	-0.04*	-0.156*	0.056	0.056	-0.12	-0.026	-0.104*
		-25.7	0.332*	0.376*	0.06*	-0.156*	-0.044	-0.044	-0.02	-0.026	-0.104*
		-25.6	0.332*	0.376*	-0.04*	-0.156*	-0.044	-0.044	-0.12	-0.126	-0.204*
		-25.5	0.332*	0.276*	-0.04*	-0.256*	-0.044	-0.044	-0.12	-0.126	-0.204*
		-25.4	0.332*	0.276*	0.06*	-0.156*	0.056	0.056	-0.12	-0.126	-0.204*
		-25.3	0.332*	0.276*	0.06*	-0.156*	0.056	0.056	-0.02	-0.026	-0.204*
		-25.2	0.232*	0.276*	0.06*	-0.156*	0.056	0.056	-0.02	-0.026	-0.204*
		-25.1	0.232*	0.276*	0.06*	-0.256*	0.056	0.056	-0.12	-0.126	-0.204*
		-25	0.332*	0.376*	0.06*	-0.256*	-0.044	-0.044	-0.12	-0.126	-0.104*
		-24.9	0.332*	0.376*	0.06*	-0.156*	-0.044	0.056	-0.22	-0.126	-0.104*
		-24.8	0.332*	0.276*	0.06*	-0.156*	-0.044	0.056	-0.12	-0.126	-0.104*
		-24.7	0.332*	0.276*	0.16*	-0.056*	-0.044	0.056	-0.12	-0.126	-0.204*
		-24.6	0.432*	0.376*	0.16*	-0.056*	-0.044	-0.044	-0.12	-0.126	-0.104*
		-24.5	0.332*	0.276*	0.16*	-0.156*	-0.144	-0.144	-0.22	-0.226	-0.104*
		-24.4	0.332*	0.276*	0.06*	-0.156*	-0.044	-0.044	-0.12	-0.126	-0.104*
		-24.3	0.332*	0.276*	0.06*	-0.156*	-0.044	-0.044	-0.12	-0.126	-0.104*
		-24.2	0.332*	0.276*	0.06*	-0.156*	-0.044	-0.044	-0.12	-0.126	-0.104*
		-24.1	0.332*	0.376*	0.06*	-0.156*	0.056	-0.044	-0.12	-0.126	-0.104*
		-24	0.332*	0.276*	0.06*	-0.156*	-0.044	-0.144	-0.22	-0.226	-0.204*
		-23.9	0.332*	0.276*	0.06*	-0.156*	-0.144	-0.044	-0.22	-0.226	-0.204*
		-23.8	0.332*	0.176*	-0.04*	-0.256*	-0.144	-0.044	-0.22	-0.226	-0.204*
		-23.7	0.332*	0.176*	-0.04*	-0.256*	-0.144	-0.044	-0.12	-0.126	-0.204*
		-23.6	0.232*	0.176*	0.06*	-0.356*	-0.144	-0.044	-0.12	-0.126	-0.104*
		-23.5	0.232*	0.176*	0.16*	-0.156*	-0.144	-0.044	-0.22	-0.226	-0.004*
		-23.4	0.232*	0.176*	0.16*	-0.156*	-0.144	-0.044	-0.22	-0.226	-0.004*
		-23.3	0.232*	0.176*	-0.04*	-0.256*	-0.144	-0.044	-0.22	-0.226	-0.004*
		-23.2	0.232*	0.176*	-0.04*	-0.256*	-0.144	-0.044	-0.22	-0.226	-0.104*
		-23.1	0.232*	0.176*	-0.04*	-0.256*	-0.144	-0.044	-0.12	-0.126	-0.104*
		-23	0.232*	0.176*	-0.04*	-0.256*	-0.144	-0.144	-0.22	-0.326	-0.104*
		-22.9	0.232*	0.176*	-0.04*	-0.256*	-0.244	-0.244	-0.22	-0.326	-0.204*
		-22.8	0.232*	0.076*	-0.04*	-0.256*	-0.244	-0.244	-0.22	-0.326	-0.204*
		-22.7	0.232*	0.076*	-0.04*	-0.256*	-0.244	-0.144	-0.32	-0.326	-0.204*
		-22.6	0.232*	0.076*	-0.04*	-0.256*	-0.244	-0.144	-0.32	-0.326	-0.204*
		-22.5	0.232*	0.176*	-0.14*	-0.356*	-0.244	-0.144	-0.22	-0.326	-0.204*
		-22.4	0.232*	0.176*	-0.04*	-0.256*	-0.244	-0.144	-0.22	-0.326	-0.104*
		-22.3	0.132*	0.076*	0.06*	-0.156*	-0.244	-0.144	-0.22	-0.326	-0.104*
		-22.2	0.132*	0.076*	0.06*	-0.156*	-0.144	-0.044	-0.22	-0.226	-0.204*
		-22.1	0.132*	0.076*	0.06*	-0.156*	-0.144	-0.044	-0.22	-0.226	-0.104*
		-22	0.132*	0.076*	0.06*	-0.156*	-0.244	-0.044	-0.22	-0.226	-0.104*
		-21.9	0.032*	0.076*	0.06*	-0.256*	-0.344	-0.144	-0.22	-0.226	-0.104*
		-21.8	0.032*	0.076*	0.06*	-0.256*	-0.344	-0.144	-0.22	-0.226	-0.104*
		-21.7	0.132*	0.076*	-0.04*	-0.256*	-0.344	-0.144	-0.22	-0.226	-0.104*
		-21.6	0.132*	-0.024*	-0.04*	-0.256*	-0.244	-0.144	-0.22	-0.226	-0.104*
		-21.5	0.132*	-0.024*	-0.04*	-0.156*	-0.244	-0.144	-0.22	-0.226	-0.104*
		-21.4	0.132*	-0.024*	0.06*	-0.056*	-0.244	-0.144	-0.22	-0.226	-0.104*
		-21.3	0.132*	-0.024*	0.06*	-0.056*	-0.244	-0.044	-0.22	-0.226	-0.104*
		-21.2	0.132*	-0.024*	0.06*	-0.156*	-0.244	-0.044	-0.22	-0.226	-0.104*
		-21.1	0.232*	0.176*	0.16*	-0.156*	-0.244	-0.044	-0.22	-0.226	-0.104*
		-21	0.232*	0.176*	0.06*	-0.256*	-0.344	-0.044	-0.22	-0.226	-0.004*
		-20.9	0.232*	0.176*	0.06*	-0.256*	-0.344	-0.044	-0.22	-0.226	-0.104*
		-20.8	0.232*	0.176*	-0.04*	-0.156*	-0.244	-0.044	-0.22	-0.226	-0.104*
		-20.7	0.232*	0.176*	-0.04*	-0.156*	-0.244	-0.044	-0.22	-0.226	-0.104*
		-20.6	0.232*	0.176*	-0.04*	-0.156*	-0.244	-0.044	-0.32	-0.326	-0.104*
		-20.5	0.232*	0.176*	-0.04*	-0.156*	-0.244	-0.144	-0.42	-0.326	-0.104*
		-20.4	0.232*	0.176*	-0.04*	-0.156*	-0.244	-0.144	-0.32	-0.326	-0.104*
		-20.3	0.032*	0.076*	-0.04*	-0.256*	-0.244	-0.044	-0.42	-0.326	-0.104*
		-20.2	0.032*	0.076*	-0.04*	-0.256*	-0.244	-0.044	-0.42	-0.226	-0.104*
		-20.1	0.032*	-0.024*	-0.04*	-0.156*	-0.244	-0.044	-0.22	-0.126	-0.104*
		-20	0.032*	-0.024*	0.06*	-0.056*	-0.144	-0.044	-0.22	-0.126	-0.104*
		-19.9	0.032*	-0.024*	0.06*	-0.056*	-0.144	-0.044	-0.32	-0.126	-0.104*
		-19.8	0.032*	0.076*	-0.14*	-0.156*	-0.144	-0.044	-0.32	-0.126	-0.104*
		-19.7	0.132*	0.076*	-0.14*	-0.156*	-0.144	-0.044	-0.22	-0.126	-0.104*
		-19.6	0.132*	0.076*	-0.04*	-0.156*	-0.144	-0.044	-0.22	-0.126	-0.204*
		-19.5	0.132*	0.076*	-0.04*	-0.156*	-0.144	-0.044	-0.22	-0.126	-0.204*
		-19.4	0.132*	0.076*	-0.04*	-0.156*	-0.044	0.056	-0.22	-0.126	-0.204*
		-19.3	0.132*	0.076*	-0.04*	-0.156*	-0.044	0.056	-0.22	-0.126	-0.104*
		-19.2	0.032*	0.076*	-0.04*	-0.156*	-0.144	-0.044	-0.32	-0.226	-0.104*
		-19.1	0.132*	0.076*	-0.04*	-0.156*	-0.144	-0.144	-0.32	-0.226	-0.204*
		-19	-0.068*	-0.024*	-0.04*	-0.156*	-0.244	-0.144	-0.32	-0.226	-0.204*
		-18.9	-0.068*	-0.024*	0.06*	-0.056*	-0.244	-0.144	-0.32	-0.226	-0.204*
		-18.8	0.032*	0.076*	-0.04*	-0.156*	-0.244	-0.144	-0.32	-0.326	-0.104*
		-18.7	0.032*	0.076*	-0.04*	-0.156*	-0.244	-0.144	-0.32	-0.326	-0.104*
		-18.6	0.032*	0.076*	-0.04*	-0.156*	-0.244	-0.144	-0.32	-0.326	-0.104*
		-18.5	0.032*	0.076*	-0.04*	-0.156*	-0.244	-0.144	-0.32	-0.226	-0.104*
		-18.4	0.032*	0.076*	-0.04*	-0.156*	-0.244	-0.144	-0.32	-0.226	-0.104*
		-18.3	0.032*	0.076*	-0.04*	-0.156*	-0.244	-0.144	-0.32	-0.226	-0.104*
		-18.2	0.032*	0.076*	-0.04*	-0.156*	-0.244	-0.144	-0.32	-0.226	-0.104*
		-18.1	0.032*	0.076*	-0.14*	-0.256*	-0.244	-0.144	-0.32	-0.226	-0.104*
		-18	0.032*	0.076*	-0.14*	-0.256*	-0.244	-0.144	-0.32	-0.226	-0.104*
		-17.9	0.032*	0.076*	-0.14*	-0.256*	-0.244	-0.144	-0.32	-0.226	-0.104*
		-17.8	0.032*	-0.024*	-0.14*	-0.256*	-0.144	-0.044	-0.32	-0.226	-0.104*
		-17.7	0.032*	-0.024*	-0.14*	-0.256*	-0.144	-0.044	-0.32	-0.226	-0.104*
		-17.6	-0.068*	-0.124*	-0.14*	-0.256*	-0.144	-0.044	-0.32	-0.226	-0.104*
		-17.5	-0.068*	-0.124*	-0.14*	-0.256*	-0.144	-0.044	-0.42	-0.226	-0.204*
		-17.4	0.032*	-0.024*	-0.14*	-0.256*	-0.144	-0.144	-0.42	-0.226	-0.204*
		-17.3	0.032*	-0.024*	-0.14*	-0.256*	-0.144	-0.144	-0.42	-0.226	-0.204*
		-17.2	-0.068*	-0.124*	-0.14*	-0.256*	-0.144	-0.144	-0.42	-0.226	-0.204*
		-17.1	-0.068*	-0.124*	-0.04*	-0.156*	-0.144	-0.144	-0.42	-0.226	-0.204*
		-17	-0.068*	-0.124*	-0.14*	-0.156*	-0.144	-0.144	-0.42	-0.226	-0.204*
		-16.9	0.032*	-0.024*	-0.14*	-0.156*	-0.144	-0.144	-0.42	-0.226	-0.204*
		-16.8	0.032*	-0.024*	-0.14*	-0.156*	-0.144	-0.044	-0.42	-0.226	-0.304*
		-16.7	-0.068*	-0.124*	-0.14*	-0.156*	-0.144	-0.044	-0.42	-0.226	-0.204*
		-16.6	-0.068*	-0.124*	-0.14*	-0.156*	-0.144	-0.044	-0.42	-0.326	-0.204*
		-16.5	0.032*	-0.024*	-0.14*	-0.156*	-0.144	-0.044	-0.42	-0.326	-0.204*
		-16.4	0.032*	-0.024*	-0.14*	-0.156*	-0.144	-0.044	-0.42	-0.326	-0.204*
		-16.3	0.032*	-0.024*	-0.14*	-0.156*	-0.144	-0.044	-0.42	-0.326	-0.204*
		-16.2	0.032*	-0.024*	-0.14*	-0.156*	-0.144	-0.044	-0.42	-0.326	-0.204*
		-16.1	0.032*	-0.124*	-0.14*	-0.156*	-0.144	-0.044	-0.42	-0.326	-0.204*
		-16	0.032*	-0.124*	-0.14*	-0.156*	-0.144	-0.144	-0.42	-0.326	-0.204*
		-15.9	0.032*	-0.124*	-0.14*	-0.156*	-0.044	-0.144	-0.32	-0.226	-0.204*
		-15.8	0.032*	-0.124*	-0.14*	-0.156*	-0.044	-0.144	-0.32	-0.226	-0.204*
		-15.7	0.032*	-0.124*	-0.14*	-0.156*	-0.044	-0.144	-0.32	-0.226	-0.204*
		-15.6	0.032*	-0.124*	-0.24*	-0.156*	-0.044	-0.144	-0.32	-0.226	-0.204*
		-15.5	-0.068*	-0.124*	-0.24*	-0.256*	-0.044	-0.144	-0.32	-0.226	-0.204*
		-15.4	-0.068*	-0.124*	-0.24*	-0.156*	-0.144	-0.144	-0.32	-0.226	-0.204*
		-15.3	-0.068*	-0.124*	-0.24*	-0.156*	-0.144	-0.144	-0.32	-0.226	-0.204*
		-15.2	-0.068*	-0.124*	-0.24*	-0.256*	-0.144	-0.144	-0.32	-0.226	-0.204*
		-15.1	-0.068*	-0.124*	-0.24*	-0.156*	-0.144	-0.144	-0.32	-0.226	-0.204*
		-15	-0.068*	-0.124*	-0.24*	-0.156*	-0.144	-0.144	-0.32	-0.226	-0.204*
		-14.9	-0.068*	-0.124*	-0.24*	-0.156*	-0.144	-0.144	-0.32	-0.226	-0.204*
		-14.8	-0.068*	-0.124*	-0.24*	-0.156*	-0.144	-0.144	-0.22	-0.226	-0.204*
		-14.7	-0.068*	-0.124*	-0.24*	-0.256*	-0.144	-0.144	-0.22	-0.226	-0.204*
		-14.6	-0.068*	-0.124*	-0.24*	-0.156*	-0.144	-0.144	-0.22	-0.226	-0.204*
		-14.5	-0.068*	-0.124*	-0.34*	-0.156*	-0.144	-0.144	-0.22	-0.226	-0.204*
		-14.4	-0.068*	-0.124*	-0.34*	-0.156*	-0.144	-0.144	-0.22	-0.226	-0.204*
		-14.3	-0.068*	-0.124*	-0.34*	-0.156*	-0.144	-0.144	-0.22	-0.226	-0.204*
		-14.2	-0.068*	-0.124*	-0.34*	-0.156*	-0.044	-0.044	-0.22	-0.226	-0.204*
		-14.1	0.032*	-0.024*	-0.34*	-0.156*	-0.144	-0.144	-0.22	-0.226	-0.204*
		-14	0.032*	-0.024*	-0.34*	-0.156*	-0.044	-0.044	-0.22	-0.226	-0.304*
		-13.9	0.032*	-0.024*	-0.34*	-0.156*	-0.044	-0.044	-0.22	-0.226	-0.304*
		-13.8	0.032*	-0.024*	-0.34*	-0.156*	-0.044	-0.044	-0.22	-0.226	-0.304*
		-13.7	0.032*	-0.024*	-0.24*	-0.056*	-0.044	-0.044	-0.32	-0.226	-0.304*
		-13.6	0.032*	-0.024*	-0.24*	-0.156*	-0.044	-0.144	-0.32	-0.226	-0.204*
		-13.5	0.032*	-0.024*	-0.24*	-0.156*	-0.044	-0.144	-0.32	-0.226	-0.304*
		-13.4	0.032*	-0.024*	-0.14*	-0.156*	-0.044	-0.144	-0.32	-0.226	-0.204*
		-13.3	0.032*	-0.024*	-0.14*	-0.156*	-0.144	-0.144	-0.32	-0.226	-0.204*
		-13.2	0.032*	-0.024*	-0.24*	-0.156*	-0.144	-0.144	-0.32	-0.226	-0.204*
		-13.1	0.032*	-0.024*	-0.14*	-0.056*	-0.144	-0.144	-0.32	-0.326	-0.204*
		-13	0.032*	-0.024*	-0.14*	-0.056*	-0.144	-0.144	-0.32	-0.326	-0.204*
		-12.9	-0.068*	-0.124*	-0.14*	-0.156*	-0.144	-0.144	-0.32	-0.326	-0.204*
		-12.8	-0.068*	-0.124*	-0.14*	-0.156*	-0.144	-0.144	-0.32	-0.326	-0.204*
		-12.7	-0.068*	-0.124*	-0.14*	-0.156*	-0.144	-0.144	-0.32	-0.226	-0.204*
		-12.6	-0.068*	-0.124*	-0.14*	-0.156*	-0.144	-0.144	-0.32	-0.226	-0.204*
		-12.5	-0.068*	-0.124*	-0.14*	-0.156*	-0.144	-0.144	-0.32	-0.226	-0.204*
		-12.4	-0.068*	-0.124*	-0.14*	-0.056*	-0.144	-0.144	-0.32	-0.226	-0.204*
		-12.3	-0.068*	-0.124*	-0.14*	-0.056*	-0.144	-0.144	-0.32	-0.226	-0.204*
		-12.2	-0.068*	-0.124*	-0.14*	-0.056*	-0.144	-0.144	-0.32	-0.226	-0.204*
		-12.1	-0.068*	-0.124*	-0.14*	-0.056*	-0.144	-0.144	-0.32	-0.226	-0.204*
		-12	-0.068*	-0.124*	-0.14*	-0.056*	-0.044	-0.044	-0.32	-0.226	-0.204*
		-11.9	-0.068*	-0.124*	-0.14*	-0.056*	-0.044	-0.044	-0.32	-0.226	-0.204*
		-11.8	0.032*	-0.024*	-0.14*	-0.056*	-0.044	-0.044	-0.32	-0.226	-0.204*
		-11.7	0.032*	-0.024*	-0.14*	-0.156*	-0.044	-0.044	-0.22	-0.226	-0.204*
		-11.6	0.032*	-0.024*	-0.14*	-0.056*	-0.044	-0.044	-0.22	-0.226	-0.204*
		-11.5	0.032*	-0.024*	-0.14*	-0.156*	-0.044	-0.044	-0.22	-0.226	-0.204*
		-11.4	0.032*	-0.024*	-0.14*	-0.156*	-0.044	-0.044	-0.22	-0.226	-0.004*
		-11.3	0.032*	-0.024*	-0.14*	-0.156*	-0.044	-0.044	-0.22	-0.226	-0.004*
		-11.2	0.032*	-0.024*	-0.04*	-0.056*	-0.044	-0.144	-0.22	-0.226	-0.004*
		-11.1	0.032*	-0.024*	-0.04*	-0.056*	-0.044	-0.144	-0.22	-0.226	-0.104*
		-11	0.032*	-0.024*	-0.04*	-0.056*	-0.144	-0.144	-0.22	-0.226	-0.104*
		-10.9	0.032*	-0.024*	-0.04*	-0.056*	-0.144	-0.144	-0.22	-0.226	-0.104*
		-10.8	0.032*	-0.024*	-0.04*	-0.056*	-0.144	-0.144	-0.22	-0.226	-0.104*
		-10.7	0.032*	-0.024*	-0.04*	-0.056*	-0.144	-0.144	-0.22	-0.226	-0.104*
		-10.6	0.032*	-0.024*	-0.04*	-0.056*	-0.144	-0.044	-0.22	-0.226	-0.104*
		-10.5	-0.068*	-0.024*	-0.04*	-0.056*	-0.244	-0.044	-0.32	-0.226	-0.104*
		-10.4	-0.068*	-0.024*	-0.04*	-0.056*	-0.244	-0.044	-0.32	-0.226	-0.104*
		-10.3	-0.068*	-0.024*	-0.04*	0.044*	-0.244	-0.044	-0.32	-0.226	-0.104*
		-10.2	-0.068*	-0.024*	-0.04*	0.044*	-0.244	-0.044	-0.32	-0.226	-0.104*
		-10.1	-0.068*	-0.024*	-0.04*	0.044*	-0.144	-0.044	-0.22	-0.126	-0.104*
		-10	-0.068*	-0.024*	-0.04*	0.044*	-0.044	0.056	-0.22	-0.126	-0.104*
		-9.9	0.032*	0.076*	-0.04*	0.044*	-0.044	0.056	-0.22	-0.126	-0.104*
		-9.8	0.032*	0.076*	-0.04*	0.044*	-0.044	0.056	-0.22	-0.126	-0.104*
		-9.7	-0.068*	-0.024*	-0.04*	0.044*	-0.044	0.056	-0.22	-0.126	-0.104*
		-9.6	-0.068*	-0.024*	-0.04*	0.044*	-0.044	0.056	-0.22	-0.126	-0.104*
		-9.5	-0.068*	-0.024*	-0.04*	0.044*	-0.044	0.056	-0.12	-0.126	-0.104*
		-9.4	-0.068*	-0.024*	0.06*	0.144*	-0.044	0.056	-0.12	-0.126	-0.104*
		-9.3	-0.068*	-0.024*	0.06*	0.144*	-0.044	0.056	-0.12	-0.126	-0.004*
		-9.2	-0.068*	-0.024*	0.06*	0.144*	-0.044	0.056	-0.02	-0.026	-0.004*
		-9.1	-0.068*	-0.024*	0.06*	0.144*	-0.044	0.056	-0.02	-0.026	-0.004*
		-9	-0.068*	-0.024*	0.06*	0.144*	-0.044	0.056	-0.02	-0.026	-0.004*
		-8.9	-0.068*	-0.024*	0.06*	0.144*	-0.044	0.056	-0.02	-0.026	-0.004*
		-8.8	-0.068*	-0.024*	0.06*	0.044*	-0.044	0.056	-0.02	-0.026	-0.004*
		-8.7	-0.068*	-0.024*	0.06*	0.044*	-0.044	0.056	-0.02	-0.026	-0.004*
		-8.6	-0.068*	-0.024*	0.06*	0.044*	-0.044	0.056	-0.02	-0.026	-0.004*
		-8.5	0.032*	-0.024*	0.06*	0.044*	-0.044	0.056	-0.02	-0.126	-0.004*
		-8.4	0.032*	-0.024*	0.06*	0.044*	-0.044	0.056	-0.02	-0.126	-0.004*
		-8.3	0.032*	-0.024*	0.06*	0.044*	-0.044	0.056	-0.12	-0.126	-0.004*
		-8.2	0.032*	-0.024*	-0.04*	-0.056*	-0.044	0.056	-0.02	-0.126	-0.004*
		-8.1	0.032*	-0.024*	-0.04*	-0.056*	-0.044	0.056	-0.02	-0.126	-0.004*
		-8	0.032*	-0.024*	-0.04*	-0.056*	-0.044	0.056	-0.02	-0.126	-0.004*
		-7.9	0.032*	-0.024*	-0.04*	-0.056*	-0.044	0.056	-0.02	-0.126	-0.004*
		-7.8	0.032*	-0.024*	-0.04*	-0.056*	-0.044	-0.044	0.08	-0.026	-0.004*
		-7.7	0.032*	-0.024*	-0.04*	-0.056*	-0.044	0.056	0.08	0.074	-0.004*
		-7.6	0.032*	-0.024*	-0.04*	-0.056*	0.056	-0.044	-0.02	-0.026	-0.004*
		-7.5	0.032*	-0.024*	-0.04*	-0.056*	0.056	-0.044	0.08	0.074	-0.004*
		-7.4	0.032*	-0.024*	-0.04*	-0.056*	0.056	-0.044	0.08	0.074	-0.004*
		-7.3	0.032*	-0.024*	-0.04*	-0.056*	0.056	-0.044	-0.02	0.074	-0.004*
		-7.2	0.032*	-0.024*	-0.04*	-0.056*	0.056	-0.044	0.08	0.074	-0.004*
		-7.1	0.032*	-0.024*	-0.04*	-0.056*	0.056	-0.044	0.08	0.074	-0.004*
		-7	0.032*	-0.024*	-0.04*	-0.056*	0.056	-0.044	-0.02	0.074	-0.004*
		-6.9	0.032*	-0.024*	-0.04*	-0.056*	0.056	-0.044	-0.02	0.074	-0.004*
		-6.8	-0.068*	-0.024*	-0.04*	-0.056*	0.056	-0.044	0.08	0.074	-0.004*
		-6.7	-0.068*	-0.024*	-0.04*	-0.056*	0.056	-0.044	0.08	0.074	-0.004*
		-6.6	-0.068*	-0.024*	0.06*	-0.056*	0.056	0.056	0.08	0.074	-0.004*
		-6.5	-0.068*	-0.024*	0.06*	-0.056*	0.056	0.056	0.08	0.074	-0.004*
		-6.4	-0.068*	-0.024*	0.06*	-0.056*	0.056	0.056	0.08	0.074	-0.004*
		-6.3	-0.068*	-0.024*	0.06*	-0.056*	0.056	0.056	0.08	0.074	-0.004*
		-6.2	-0.068*	-0.024*	0.06*	-0.056*	0.056	0.056	0.08	0.174	-0.004*
		-6.1	-0.068*	-0.024*	0.06*	-0.056*	0.056	-0.044	0.08	0.174	-0.004*
		-6	0.032*	0.076*	0.06*	-0.056*	0.056	-0.044	0.08	0.074	0.096*
		-5.9	0.032*	0.076*	0.06*	-0.056*	0.056	-0.144	0.08	0.074	0.096*
		-5.8	0.032*	0.076*	-0.04*	-0.056*	0.056	-0.044	0.08	0.074	0.096*
		-5.7	0.032*	0.076*	-0.04*	-0.056*	-0.044	-0.144	0.08	0.074	0.096*
		-5.6	0.032*	0.076*	-0.04*	-0.056*	-0.044	-0.144	0.08	0.074	0.096*
		-5.5	0.132*	0.076*	-0.04*	-0.056*	-0.044	-0.144	0.08	0.074	0.096*
		-5.4	0.132*	0.076*	-0.04*	0.044*	-0.044	-0.144	0.08	0.074	0.096*
		-5.3	0.132*	0.076*	-0.04*	0.044*	0.056	-0.044	0.08	0.074	0.096*
		-5.2	0.132*	0.076*	-0.04*	0.044*	0.056	-0.044	0.08	0.074	0.096*
		-5.1	0.132*	0.076*	-0.04*	0.044*	0.056	-0.144	0.08	0.074	-0.004*
		-5	0.132*	0.076*	-0.04*	0.044*	0.056	-0.144	0.08	0.074	-0.004*
		-4.9	0.132*	0.076*	0.06*	0.144*	0.056	-0.144	0.08	0.074	-0.004*
		-4.8	0.132*	0.076*	0.06*	0.144*	-0.044	-0.244	0.18	0.174	-0.004*
		-4.7	0.132*	0.076*	0.06*	0.044*	-0.044	-0.244	0.18	0.174	-0.004*
		-4.6	0.132*	0.076*	0.06*	0.044*	0.056	-0.144	0.18	0.174	-0.004*
		-4.5	0.132*	0.076*	0.06*	0.044*	-0.044	-0.144	0.18	0.174	-0.004*
		-4.4	0.132*	-0.024*	0.06*	0.044*	-0.044	-0.144	0.18	0.174	-0.004*
		-4.3	0.132*	-0.024*	0.06*	0.044*	-0.044	-0.144	0.18	0.174	-0.004*
		-4.2	0.132*	0.076*	0.06*	0.044*	-0.044	-0.144	0.18	0.174	-0.004*
		-4.1	0.132*	0.076*	0.06*	0.044*	-0.044	-0.144	0.18	0.174	-0.004*
		-4	0.032*	0.076*	0.06*	0.044*	-0.044	-0.144	0.18	0.174	-0.004*
		-3.9	0.032*	0.076*	0.06*	0.044*	-0.044	-0.144	0.18	0.174	-0.104*
		-3.8	0.132*	0.076*	0.06*	0.044*	0.056	-0.144	0.18	0.174	-0.104*
		-3.7	0.132*	-0.024*	0.06*	0.044*	-0.044	-0.144	0.18	0.174	-0.104*
		-3.6	0.132*	-0.024*	0.06*	0.044*	-0.044	-0.144	0.18	0.174	-0.004*
		-3.5	0.132*	-0.024*	0.06*	0.044*	-0.044	-0.144	0.18	0.174	-0.104*
		-3.4	0.132*	0.076*	0.06*	0.144*	-0.044	-0.144	0.08	0.174	-0.104*
		-3.3	0.132*	0.076*	0.06*	0.144*	-0.044	-0.144	0.08	0.174	-0.104*
		-3.2	0.132*	0.076*	0.06*	0.144*	-0.044	-0.144	0.08	0.174	-0.104*
		-3.1	0.132*	-0.024*	0.06*	0.144*	-0.044	-0.144	0.08	0.074	-0.104*
		-3	0.132*	-0.024*	0.06*	0.044*	-0.044	-0.144	0.18	0.074	-0.104*
		-2.9	0.132*	-0.024*	0.06*	0.044*	-0.044	-0.144	0.18	0.074	-0.204*
		-2.8	0.132*	-0.024*	0.06*	0.044*	0.056	-0.144	0.18	0.074	-0.204*
		-2.7	0.032*	-0.024*	-0.04*	0.044*	0.056	-0.044	0.18	0.074	-0.204*
		-2.6	0.032*	-0.024*	0.06*	0.044*	0.056	-0.144	0.28	0.174	-0.204*
		-2.5	0.132*	0.076*	0.06*	0.044*	0.056	-0.144	0.28	0.174	-0.204*
		-2.4	0.132*	0.076*	0.16*	0.044*	0.056	-0.144	0.18	0.174	-0.104*
		-2.3	0.132*	0.076*	0.06*	0.144*	0.056	-0.144	0.18	0.174	-0.104*
		-2.2	-0.068*	-0.124*	0.06*	0.144*	0.056	-0.144	0.18	0.074	-0.104*
		-2.1	0.032*	-0.124*	0.06*	0.144*	0.056	-0.144	0.18	0.174	-0.104*
		-2	0.032*	-0.024*	0.06*	0.144*	0.056	-0.144	0.18	0.174	-0.104*
		-1.9	-0.068*	-0.024*	0.16*	0.244*	0.056	-0.144	0.18	0.174	-0.104*
		-1.8	-0.068*	-0.024*	0.26*	0.244*	0.156	-0.044	0.18	0.074	-0.104*
		-1.7	-0.068*	-0.124*	0.16*	0.244*	0.156	-0.144	0.18	0.074	-0.204*
		-1.6	-0.068*	-0.124*	0.16*	0.144*	0.156	-0.144	0.08	0.074	-0.204*
		-1.5	0.032*	0.076*	0.16*	0.144*	0.156	-0.144	0.08	0.074	-0.204*
		-1.4	0.032*	-0.024*	-0.04*	0.144*	0.156	-0.144	0.18	0.074	-0.204*
		-1.3	-0.068*	-0.124*	-0.14*	0.044*	0.156	-0.144	0.18	0.174	-0.204*
		-1.2	-0.168*	-0.224*	0.06*	0.144*	0.256	0.056	0.18	-0.026	-0.204*
		-1.1	-0.068*	-0.224*	-0.14*	-0.056*	0.156	-0.244	0.28	0.074	-0.104*
		-1	0.132*	-0.024*	-0.04*	-0.156*	0.156	-0.144	0.18	-0.026	-0.004*
		-0.9	-0.268*	-0.524*	-0.04*	-0.056*	0.256	0.056	-0.12	-0.226	-0.104*
		-0.8	-1.968*	-2.024*	-0.64*	-0.656*	0.656	0.156	-0.42	-0.426	-1.504*
		-0.7	-1.068*	-0.624*	-0.74*	-1.456*	1.256	1.056	-0.52	-1.726	-0.704*
		-0.6	-0.168*	-0.424*	-0.64*	-0.656*	0.356	0.156	-0.42	-0.426	-0.504*
		-0.5	-0.168*	-0.024*	-0.24*	-0.256*	-0.044	-0.244	-0.02	-0.126	-0.104*
		-0.4	-0.068*	-0.024*	-0.64*	-0.556*	0.156	-0.144	-0.12	-0.126	-0.104*
		-0.3	0.232*	0.176*	-0.04*	-0.356*	-0.044	-0.544	0.08	-0.026	0.096*
		-0.2	0.532*	0.176*	-0.14*	0.044*	0.256	0.056	0.18	0.074	0.696*
		-0.1	1.632*	1.676*	-0.04*	0.044*	-0.144	0.056	0.78	0.474	1.296*
		0	2.832*	2.876*	0.26*	-0.156*	0.256	0.356	2.48	2.074	2.796*
		0.1	4.632*	3.976*	0.46*	0.444*	-0.144	-0.244	4.58	3.874	3.796*
		0.2	4.532*	3.976*	-0.14*	0.344*	-0.644	-0.844	3.88	4.074	3.796*
		0.3	3.432*	2.876*	-0.24*	0.344*	-0.444	-0.944	3.58	3.574	3.396*
		0.4	3.232*	3.076*	-0.04*	0.444*	-0.344	-0.544	3.08	3.274	2.596*
		0.5	1.932*	1.876*	0.06*	0.344*	0.156	-0.044	2.98	3.074	1.996*
		0.6	1.932*	1.776*	-0.14*	0.344*	0.056	-0.244	2.88	3.074	1.496*
		0.7	1.632*	1.476*	-0.14*	-0.056*	0.456	-0.144	2.68	3.174	1.396*
		0.8	1.832*	1.076*	-0.04*	-0.056*	0.056	0.056	2.78	2.874	1.196*
		0.9	1.932*	1.376*	-0.04*	0.144*	0.156	-0.144	2.38	3.174	0.996*
		1	1.532*	1.276*	0.16*	0.444*	0.156	0.156	2.88	3.974	0.896*
		1.1	1.332*	1.176*	-0.14*	0.044*	0.656	0.456	2.68	3.774	1.196*
		1.2	1.232*	1.076*	-0.24*	-0.056*	0.556	0.756	2.58	3.674	1.096*
		1.3	0.932*	0.976*	-0.04*	0.244*	0.456	0.856	2.48	3.674	0.996*
		1.4	0.832*	0.776*	0.36*	0.544*	0.356	0.856	2.68	4.274	0.696*
		1.5	0.832*	0.776*	0.46*	0.444*	0.556	1.056	2.98	4.274	0.696*
		1.6	1.232*	1.176*	0.36*	0.444*	0.756	1.056	3.08	4.474	0.596*
		1.7	0.932*	0.976*	0.26*	0.544*	0.756	1.056	3.48	4.674	0.596*
		1.8	0.732*	0.676*	0.16*	0.644*	0.756	1.156	3.38	4.874	0.496*
		1.9	0.732*	0.576*	0.16*	0.444*	0.756	1.156	3.38	5.074	0.696*
		2	1.232*	0.976*	0.26*	0.444*	0.556	0.756	3.48	5.374	0.696*
		2.1	0.932*	0.776*	0.26*	0.244*	0.856	1.156	3.28	5.474	0.796*
		2.2	0.932*	0.876*	0.46*	0.444*	1.056	1.456	3.38	5.574	0.596*
		2.3	0.832*	0.676*	0.46*	0.344*	1.056	1.656	3.58	5.474	0.696*
		2.4	0.732*	0.576*	0.46*	0.444*	1.156	1.856	3.78	5.774	0.596*
		2.5	0.632*	0.676*	0.36*	0.344*	1.156	1.956	3.78	5.974	0.596*
		2.6	0.632*	0.476*	0.46*	0.444*	1.156	1.956	3.98	6.074	0.596*
		2.7	0.532*	0.276*	0.26*	0.444*	1.256	2.056	4.18	6.374	0.596*
		2.8	0.632*	0.376*	0.26*	0.344*	1.256	2.056	4.18	6.474	0.496*
		2.9	0.832*	0.576*	0.36*	0.444*	1.356	2.156	4.28	6.574	0.496*
		3	0.832*	0.576*	0.46*	0.544*	1.456	2.256	4.38	6.574	0.496*
		3.1	0.832*	0.576*	0.36*	0.544*	1.456	2.356	4.48	6.674	0.496*
		3.2	0.732*	0.576*	0.46*	0.644*	1.256	2.256	4.58	6.774	0.396*
		3.3	0.632*	0.576*	0.46*	0.644*	1.256	2.256	4.58	6.774	0.496*
		3.4	0.732*	0.576*	0.66*	0.744*	1.356	2.356	4.48	6.974	0.496*
		3.5	0.632*	0.576*	0.56*	0.544*	1.456	2.456	4.48	7.074	0.396*
		3.6	0.632*	0.676*	0.66*	0.744*	1.456	2.556	4.68	7.174	0.296*
		3.7	0.732*	0.576*	0.56*	0.644*	1.456	2.656	4.68	7.374	0.296*
		3.8	0.632*	0.576*	0.66*	0.844*	1.556	2.856	4.68	7.374	0.296*
		3.9	0.732*	0.676*	0.66*	0.844*	1.456	2.856	4.68	7.374	0.196*
		4	0.632*	0.476*	0.66*	0.744*	1.556	2.856	4.78	7.474	0.196*
		4.1	0.632*	0.576*	0.66*	0.744*	1.656	2.856	4.88	7.574	0.296*
		4.2	0.632*	0.476*	0.66*	0.744*	1.556	2.856	4.98	7.674	0.296*
		4.3	0.532*	0.576*	0.96*	0.944*	1.756	2.956	4.98	7.674	0.196*
		4.4	0.532*	0.576*	0.96*	0.944*	1.656	3.056	5.08	7.674	0.196*
		4.5	0.532*	0.476*	0.76*	0.944*	1.656	2.956	5.18	7.574	0.196*
		4.6	0.532*	0.476*	0.86*	0.944*	1.756	2.956	5.18	7.774	0.196*
		4.7	0.632*	0.576*	0.76*	0.844*	1.756	3.056	5.28	8.074	0.196*
		4.8	0.532*	0.476*	0.86*	0.944*	1.756	3.056	5.28	8.174	0.196*
		4.9	0.632*	0.576*	0.76*	0.844*	1.756	3.056	5.38	8.174	0.196*
		5	0.532*	0.476*	0.86*	0.944*	1.956	3.256	5.38	8.174	0.296*
		5.1	0.532*	0.476*	0.86*	0.944*	2.056	3.156	5.38	8.174	0.296*
		5.2	0.532*	0.676*	0.86*	1.044*	2.056	3.156	5.48	8.274	0.096*
		5.3	0.532*	0.676*	0.76*	0.944*	1.856	3.156	5.38	8.174	0.096*
		5.4	0.532*	0.476*	0.76*	0.944*	1.956	3.156	5.38	8.174	-0.004*
		5.5	0.632*	0.576*	0.76*	1.044*	1.856	3.156	5.38	8.174	0.096*
		5.6	0.532*	0.576*	0.86*	0.944*	1.856	3.056	5.48	8.374	0.196*
		5.7	0.632*	0.676*	0.76*	0.944*	1.856	3.056	5.48	8.274	-0.104*
		5.8	0.632*	0.576*	0.76*	1.044*	1.956	3.156	5.48	8.274	0.096*
		5.9	0.532*	0.476*	0.76*	1.044*	1.956	3.156	5.58	8.374	-0.004*
		6	0.632*	0.476*	0.76*	1.044*	1.856	3.056	5.48	8.374	-0.004*
		6.1	0.532*	0.476*	0.76*	0.944*	1.956	3.056	5.48	8.374	-0.004*
		6.2	0.632*	0.576*	0.86*	1.044*	1.756	3.056	5.68	8.474	-0.104*
		6.3	0.532*	0.376*	0.66*	0.944*	1.756	3.056	5.68	8.574	-0.104*
		6.4	0.532*	0.576*	0.86*	1.144*	1.856	2.956	5.68	8.474	-0.104*
		6.5	0.532*	0.476*	0.86*	1.044*	1.856	2.956	5.78	8.574	-0.004*
		6.6	0.532*	0.576*	0.86*	1.044*	1.756	2.956	5.68	8.574	-0.104*
		6.7	0.632*	0.576*	0.86*	1.144*	1.856	3.056	5.88	8.674	-0.004*
		6.8	0.732*	0.676*	0.86*	1.044*	1.756	3.056	5.88	8.674	-0.004*
		6.9	0.532*	0.576*	0.76*	1.044*	1.956	3.156	5.78	8.674	-0.104*
		7	0.732*	0.676*	0.86*	1.044*	1.756	3.056	5.88	8.674	-0.004*
		7.1	0.632*	0.676*	0.86*	1.044*	1.856	3.056	5.88	8.774	0.096*
		7.2	0.632*	0.576*	0.86*	1.144*	1.856	3.056	5.78	8.674	-0.104*
		7.3	0.732*	0.776*	0.96*	1.144*	1.856	3.156	5.98	8.774	0.096*
		7.4	0.632*	0.576*	0.96*	1.044*	1.856	3.056	6.08	8.874	0.096*
		7.5	0.532*	0.676*	0.86*	0.944*	1.856	3.256	5.98	8.674	0.096*
		7.6	0.732*	0.676*	0.96*	1.044*	1.856	3.156	5.98	8.774	0.196*
		7.7	0.632*	0.676*	0.96*	1.144*	1.856	3.156	6.08	8.874	0.096*
		7.8	0.632*	0.676*	0.96*	0.944*	1.956	3.156	6.08	8.874	0.096*
		7.9	0.732*	0.676*	0.96*	1.144*	1.956	3.256	6.08	8.874	0.196*
		8	0.732*	0.776*	0.96*	1.044*	1.856	3.156	6.18	8.974	0.096*
		8.1	0.632*	0.576*	0.86*	1.144*	1.956	3.256	6.18	8.874	0.196*
		8.2	0.832*	0.776*	0.96*	1.044*	1.956	3.156	6.18	8.874	0.096*
		8.3	0.732*	0.776*	1.06*	1.244*	2.056	3.156	6.28	9.074	0.296*
		8.4	0.732*	0.676*	0.96*	1.244*	1.856	3.156	6.28	8.974	0.196*
		8.5	0.732*	0.776*	0.96*	1.144*	1.956	3.056	6.28	8.974	0.096*
		8.6	0.732*	0.676*	0.86*	1.144*	2.056	3.256	6.28	9.074	0.196*
		8.7	0.732*	0.676*	0.96*	1.144*	2.056	3.156	6.38	9.074	0.196*
		8.8	0.732*	0.576*	0.96*	1.244*	1.956	3.156	6.28	8.974	0.196*
		8.9	0.632*	0.576*	0.86*	1.044*	2.056	3.256	6.48	9.174	0.196*
		9	0.732*	0.676*	0.76*	1.044*	2.056	3.156	6.38	9.074	0.196*
		9.1	0.832*	0.676*	0.96*	1.144*	2.056	3.256	6.48	9.174	0.296*
		9.2	0.632*	0.576*	0.86*	1.044*	2.056	3.256	6.58	9.174	0.196*
		9.3	0.732*	0.576*	0.76*	0.944*	2.256	3.356	6.38	9.174	0.196*
		9.4	0.732*	0.576*	0.76*	1.044*	2.056	3.356	6.48	9.174	0.296*
		9.5	0.632*	0.476*	0.76*	0.944*	2.156	3.356	6.68	9.374	0.296*
		9.6	0.632*	0.476*	0.66*	0.944*	2.056	3.356	6.48	9.174	0.296*
		9.7	0.632*	0.476*	0.76*	0.944*	2.156	3.456	6.58	9.274	0.396*
		9.8	0.632*	0.576*	0.76*	0.944*	2.056	3.356	6.48	9.274	0.396*
		9.9	0.632*	0.376*	0.76*	0.944*	2.056	3.456	6.68	9.274	0.296*
		10	0.632*	0.576*	0.66*	0.944*	1.956	3.256	6.58	9.174	0.396*
		10.1	0.532*	0.376*	0.76*	0.844*	2.156	3.456	6.48	9.174	0.196*
		10.2	0.432*	0.476*	0.76*	0.944*	1.956	3.356	6.58	9.274	0.296*
		10.3	0.432*	0.376*	0.76*	0.944*	1.956	3.356	6.58	9.174	0.196*
		10.4	0.632*	0.576*	0.66*	0.844*	1.956	3.356	6.48	9.174	0.296*
		10.5	0.432*	0.476*	0.76*	0.844*	1.956	3.356	6.68	9.374	0.296*
		10.6	0.532*	0.476*	0.76*	0.944*	1.956	3.456	6.48	9.174	0.096*
		10.7	0.332*	0.376*	0.76*	0.844*	1.856	3.356	6.38	9.174	0.096*
		10.8	0.532*	0.576*	0.66*	0.844*	2.056	3.556	6.48	9.274	0.196*
		10.9	0.432*	0.476*	0.86*	0.944*	1.956	3.556	6.58	9.274	-0.004*
		11	0.432*	0.576*	0.76*	0.844*	1.956	3.556	6.48	9.174	0.196*
		11.1	0.532*	0.576*	0.76*	0.944*	1.956	3.556	6.48	9.274	0.096*
		11.2	0.532*	0.676*	0.76*	0.944*	1.956	3.556	6.38	9.274	0.096*
		11.3	0.532*	0.476*	0.86*	0.944*	2.056	3.556	6.58	9.274	-0.104*
		11.4	0.532*	0.676*	0.66*	0.944*	1.956	3.656	6.58	9.274	0.096*
		11.5	0.532*	0.576*	0.76*	0.944*	1.956	3.556	6.48	9.274	0.096*
		11.6	0.532*	0.476*	0.96*	1.044*	1.956	3.556	6.68	9.374	-0.004*
		11.7	0.632*	0.576*	0.76*	1.044*	1.856	3.456	6.68	9.374	0.096*
		11.8	0.632*	0.576*	0.66*	0.944*	2.056	3.656	6.48	9.374	0.096*
		11.9	0.632*	0.476*	0.86*	1.044*	2.056	3.756	6.48	9.274	-0.004*
		12	0.632*	0.576*	0.76*	0.944*	1.956	3.556	6.48	9.274	-0.004*
		12.1	0.632*	0.476*	0.76*	1.044*	2.056	3.656	6.58	9.374	0.096*
		12.2	0.532*	0.376*	0.66*	1.044*	1.856	3.656	6.58	9.374	-0.004*
		12.3	0.632*	0.476*	0.66*	1.044*	2.056	3.656	6.58	9.374	-0.004*
		12.4	0.732*	0.476*	0.86*	1.144*	2.056	3.756	6.58	9.374	-0.004*
		12.5	0.532*	0.476*	0.76*	1.044*	1.956	3.756	6.58	9.474	0.096*
		12.6	0.632*	0.676*	0.76*	1.044*	2.156	3.756	6.68	9.474	0.096*
		12.7	0.532*	0.476*	0.76*	1.144*	2.056	3.856	6.48	9.474	0.096*
		12.8	0.532*	0.576*	0.86*	1.044*	2.156	3.856	6.58	9.374	-0.004*
		12.9	0.632*	0.576*	0.86*	1.044*	2.156	3.856	6.58	9.374	0.196*
		13	0.632*	0.676*	0.96*	1.144*	2.156	3.856	6.68	9.574	0.196*
		13.1	0.632*	0.476*	0.86*	1.044*	2.156	3.856	6.68	9.474	0.096*
		13.2	0.632*	0.476*	0.86*	0.944*	2.256	3.856	6.78	9.474	-0.004*
		13.3	0.532*	0.576*	0.96*	1.044*	2.156	3.956	6.68	9.374	0.096*
		13.4	0.632*	0.576*	0.86*	1.044*	2.156	3.956	6.68	9.374	0.096*
		13.5	0.532*	0.476*	0.86*	0.944*	2.156	3.856	6.68	9.474	-0.004*
		13.6	0.532*	0.476*	0.96*	1.044*	2.356	3.956	6.68	9.474	0.096*
		13.7	0.632*	0.476*	0.86*	1.044*	2.256	4.056	6.68	9.374	0.096*
		13.8	0.532*	0.476*	0.86*	1.044*	2.256	4.056	6.68	9.374	0.096*
		13.9	0.532*	0.576*	0.96*	1.144*	2.256	3.956	6.78	9.474	-0.004*
		14	0.632*	0.576*	0.96*	1.144*	2.256	3.956	6.78	9.474	-0.004*
		14.1	0.632*	0.576*	0.76*	1.044*	2.156	3.956	6.78	9.474	-0.104*
		14.2	0.432*	0.476*	0.76*	0.944*	2.156	3.956	6.68	9.474	-0.004*
		14.3	0.532*	0.376*	0.86*	1.044*	2.156	3.956	6.68	9.474	-0.004*
		14.4	0.532*	0.376*	0.86*	1.044*	2.256	3.956	6.78	9.474	-0.004*
		14.5	0.432*	0.476*	0.76*	1.044*	2.256	3.956	6.78	9.474	-0.104*
		14.6	0.432*	0.476*	0.76*	1.044*	2.256	3.956	6.68	9.474	-0.004*
		14.7	0.432*	0.476*	0.76*	1.144*	2.156	4.056	6.68	9.474	-0.104*
		14.8	0.532*	0.576*	0.76*	1.144*	2.156	4.056	6.78	9.574	-0.104*
		14.9	0.432*	0.476*	0.76*	1.144*	2.256	4.056	6.78	9.474	-0.104*
		15	0.432*	0.476*	0.86*	1.244*	2.156	3.956	6.68	9.474	-0.004*
		15.1	0.432*	0.476*	0.66*	1.144*	2.056	3.956	6.68	9.374	-0.104*
		15.2	0.532*	0.576*	0.76*	1.144*	2.056	3.956	6.68	9.474	-0.104*
		15.3	0.532*	0.576*	0.76*	1.144*	2.156	4.056	6.68	9.474	-0.104*
		15.4	0.432*	0.476*	0.66*	1.044*	2.156	4.056	6.68	9.474	-0.104*
		15.5	0.432*	0.576*	0.66*	1.144*	2.156	3.956	6.78	9.374	-0.104*
		15.6	0.432*	0.576*	0.66*	1.144*	2.156	3.956	6.78	9.474	-0.004*
		15.7	0.432*	0.676*	0.66*	1.144*	2.256	4.056	6.78	9.474	-0.104*
		15.8	0.432*	0.676*	0.66*	1.144*	2.256	4.056	6.88	9.474	-0.104*
		15.9	0.532*	0.676*	0.56*	1.144*	2.056	3.956	6.88	9.474	-0.004*
		16	0.532*	0.676*	0.66*	1.144*	2.056	3.956	6.68	9.374	-0.004*
		16.1	0.532*	0.676*	0.66*	1.144*	2.156	4.056	6.68	9.474	-0.104*
		16.2	0.432*	0.676*	0.66*	1.144*	2.156	3.956	6.78	9.374	-0.104*
		16.3	0.532*	0.676*	0.56*	1.144*	2.156	3.956	6.78	9.374	-0.104*
		16.4	0.432*	0.576*	0.66*	1.044*	2.156	3.956	6.78	9.374	-0.104*
		16.5	0.432*	0.676*	0.66*	1.144*	2.256	4.056	6.78	9.474	-0.104*
		16.6	0.432*	0.676*	0.66*	1.144*	2.256	4.056	6.88	9.474	-0.104*
		16.7	0.532*	0.676*	0.66*	1.144*	2.256	4.056	6.78	9.474	-0.004*
		16.8	0.532*	0.676*	0.56*	1.044*	2.256	4.056	6.68	9.374	-0.104*
		16.9	0.432*	0.776*	0.56*	1.044*	2.156	4.056	6.78	9.374	-0.204*
		17	0.532*	0.776*	0.66*	1.044*	2.156	4.056	6.78	9.374	-0.204*
		17.1	0.532*	0.676*	0.66*	1.144*	2.156	4.056	6.78	9.374	-0.204*
		17.2	0.532*	0.676*	0.66*	1.144*	2.256	4.056	6.88	9.374	-0.104*
		17.3	0.432*	0.576*	0.66*	1.144*	2.256	4.156	6.88	9.474	-0.104*
		17.4	0.532*	0.576*	0.66*	1.144*	2.156	3.956	6.88	9.474	-0.104*
		17.5	0.532*	0.676*	0.66*	1.144*	2.156	3.956	6.88	9.474	-0.204*
		17.6	0.432*	0.676*	0.66*	1.144*	2.256	3.956	6.98	9.474	-0.204*
		17.7	0.432*	0.676*	0.66*	1.144*	2.156	4.056	6.88	9.474	-0.104*
		17.8	0.532*	0.676*	0.66*	1.144*	2.156	4.056	6.78	9.374	-0.104*
		17.9	0.532*	0.676*	0.66*	1.144*	2.156	4.056	6.78	9.374	-0.104*
		18	0.532*	0.776*	0.76*	1.144*	2.256	4.156	6.88	9.474	-0.104*
		18.1	0.432*	0.676*	0.76*	1.144*	2.256	4.156	6.88	9.474	-0.204*
		18.2	0.432*	0.676*	0.66*	1.144*	2.156	4.056	6.88	9.474	-0.104*
		18.3	0.432*	0.676*	0.56*	1.044*	2.156	4.156	6.88	9.374	-0.104*
		18.4	0.432*	0.676*	0.56*	1.044*	2.256	4.156	6.88	9.474	-0.104*
		18.5	0.532*	0.576*	0.56*	0.944*	2.256	4.056	6.88	9.474	-0.204*
		18.6	0.532*	0.676*	0.56*	1.044*	2.256	4.156	6.78	9.374	-0.204*
		18.7	0.532*	0.676*	0.56*	1.044*	2.256	4.156	6.78	9.374	-0.104*
		18.8	0.532*	0.576*	0.56*	1.044*	2.356	4.156	6.88	9.474	-0.104*
		18.9	0.532*	0.576*	0.56*	1.044*	2.256	4.056	6.88	9.474	-0.204*
		19	0.432*	0.676*	0.56*	1.144*	2.156	4.056	6.88	9.374	-0.204*
		19.1	0.432*	0.676*	0.46*	1.044*	2.156	4.056	6.98	9.374	-0.104*
		19.2	0.532*	0.676*	0.66*	1.144*	2.256	4.156	6.88	9.474	-0.104*
		19.3	0.532*	0.676*	0.56*	1.044*	2.256	4.156	6.78	9.374	-0.104*
		19.4	0.532*	0.776*	0.56*	1.044*	2.256	4.156	6.78	9.374	-0.104*
		19.5	0.532*	0.676*	0.66*	1.044*	2.156	4.056	6.88	9.374	-0.104*
		19.6	0.532*	0.676*	0.56*	1.044*	2.156	4.056	6.88	9.374	-0.104*
		19.7	0.432*	0.576*	0.56*	1.044*	2.256	4.156	6.88	9.374	-0.104*
		19.8	0.432*	0.576*	0.66*	1.144*	2.256	4.156	6.88	9.474	-0.104*
		19.9	0.432*	0.676*	0.66*	1.144*	2.356	4.156	6.88	9.474	0.096*
		20	0.532*	0.676*	0.66*	1.144*	2.256	4.156	6.98	9.474	-0.004*
		20.1	0.432*	0.476*	0.66*	1.044*	2.156	4.056	6.88	9.374	-0.004*
		20.2	0.432*	0.476*	0.66*	1.044*	2.156	4.056	6.78	9.374	0.096*
		20.3	0.332*	0.576*	0.76*	1.144*	2.356	4.156	6.78	9.474	-0.004*
		20.4	0.432*	0.576*	0.66*	1.144*	2.356	4.156	6.88	9.474	-0.004*
		20.5	0.432*	0.576*	0.66*	1.144*	2.356	4.156	6.88	9.474	-0.004*
		20.6	0.432*	0.576*	0.66*	1.144*	2.356	4.156	6.88	9.474	-0.004*
		20.7	0.532*	0.576*	0.76*	1.244*	2.256	4.056	6.78	9.374	0.096*
		20.8	0.532*	0.576*	0.76*	1.244*	2.356	4.056	6.78	9.374	0.096*
		20.9	0.332*	0.576*	0.66*	1.044*	2.356	4.056	6.88	9.374	0.096*
		21	0.432*	0.476*	0.66*	1.044*	2.256	4.056	6.88	9.374	0.096*
		21.1	0.432*	0.476*	0.66*	1.144*	2.356	4.056	6.88	9.374	0.196*
		21.2	0.532*	0.576*	0.66*	1.144*	2.356	4.056	6.88	9.474	0.196*
		21.3	0.532*	0.576*	0.76*	1.144*	2.256	3.956	6.88	9.374	-0.004*
		21.4	0.432*	0.576*	0.76*	1.144*	2.456	4.156	6.88	9.374	-0.004*
		21.5	0.432*	0.476*	0.76*	1.244*	2.456	4.156	6.88	9.374	-0.004*
		21.6	0.432*	0.476*	0.66*	1.144*	2.556	4.156	6.78	9.374	0.096*
		21.7	0.432*	0.576*	0.66*	1.144*	2.556	4.156	6.88	9.374	0.096*
		21.8	0.432*	0.576*	0.66*	1.144*	2.356	4.156	6.68	9.274	0.096*
		21.9	0.532*	0.576*	0.66*	1.244*	2.356	4.156	6.68	9.274	-0.004*
		22	0.532*	0.576*	0.76*	1.244*	2.356	4.056	6.68	9.174	-0.004*
		22.1	0.432*	0.576*	0.86*	1.344*	2.456	4.156	6.68	9.274	0.096*
		22.2	0.432*	0.576*	0.76*	1.344*	2.456	4.156	6.68	9.274	-0.004*
		22.3	0.432*	0.476*	0.66*	1.244*	2.356	4.056	6.68	9.174	-0.004*
		22.4	0.432*	0.476*	0.76*	1.244*	2.456	4.056	6.68	9.274	-0.004*
		22.5	0.532*	0.476*	0.76*	1.244*	2.456	4.056	6.68	9.274	-0.004*
		22.6	0.632*	0.676*	0.76*	1.244*	2.456	4.156	6.68	9.274	0.096*
		22.7	0.632*	0.676*	0.86*	1.344*	2.456	4.156	6.68	9.274	0.096*
		22.8	0.732*	0.676*	0.76*	1.244*	2.356	4.056	6.78	9.274	-0.004*
		22.9	0.632*	0.676*	0.76*	1.244*	2.456	4.056	6.68	9.274	-0.004*
		23	0.532*	0.576*	0.76*	1.244*	2.456	4.156	6.58	9.274	-0.004*
		23.1	0.532*	0.676*	0.86*	1.244*	2.356	4.156	6.58	9.274	0.096*
		23.2	0.632*	0.676*	0.86*	1.344*	2.356	4.156	6.58	9.274	0.196*
		23.3	0.632*	0.676*	0.76*	1.344*	2.356	3.956	6.58	9.274	0.096*
		23.4	0.632*	0.576*	0.76*	1.344*	2.356	4.056	6.68	9.274	0.096*
		23.5	0.632*	0.576*	0.76*	1.344*	2.356	4.056	6.68	9.274	0.096*
		23.6	0.532*	0.576*	0.76*	1.344*	2.356	4.056	6.68	9.274	-0.004*
		23.7	0.532*	0.576*	0.76*	1.344*	2.356	4.056	6.58	9.174	0.096*
		23.8	0.632*	0.576*	0.76*	1.344*	2.456	4.056	6.68	9.174	-0.004*
		23.9	0.632*	0.576*	0.76*	1.344*	2.456	4.156	6.68	9.274	-0.004*
		24	0.632*	0.576*	0.86*	1.344*	2.356	4.056	6.68	9.274	-0.004*
		24.1	0.732*	0.676*	0.86*	1.444*	2.356	4.056	6.68	9.274	0.096*
		24.2	0.732*	0.676*	0.86*	1.444*	2.356	3.956	6.58	9.174	0.096*
		24.3	0.732*	0.676*	0.76*	1.344*	2.356	4.056	6.78	9.174	0.096*
		24.4	0.732*	0.676*	0.86*	1.444*	2.356	4.056	6.78	9.174	-0.004*
		24.5	0.832*	0.676*	0.86*	1.444*	2.456	4.056	6.78	9.174	-0.004*
		24.6	0.832*	0.676*	0.86*	1.444*	2.456	4.056	6.68	9.174	-0.004*
		24.7	0.732*	0.676*	0.86*	1.444*	2.356	3.956	6.68	9.174	0.096*
		24.8	0.632*	0.676*	0.76*	1.444*	2.356	3.956	6.58	9.174	0.196*
		24.9	0.732*	0.576*	0.76*	1.444*	2.456	4.056	6.68	9.174	0.196*
		25	0.732*	0.576*	0.76*	1.444*	2.456	4.056	6.68	9.174	0.096*
		25.1	0.732*	0.676*	0.86*	1.444*	2.356	3.956	6.68	9.174	0.096*
		25.2	0.732*	0.676*	0.86*	1.444*	2.356	3.956	6.68	9.174	0.196*
		25.3	0.732*	0.576*	0.86*	1.544*	2.356	3.956	6.68	9.074	0.196*
		25.4	0.732*	0.576*	0.76*	1.544*	2.456	4.056	6.68	9.074	0.196*
		25.5	0.732*	0.576*	0.76*	1.444*	2.456	4.056	6.68	9.074	0.096*
		25.6	0.732*	0.676*	0.76*	1.444*	2.356	4.056	6.68	9.174	0.096*
		25.7	0.732*	0.676*	0.76*	1.444*	2.356	4.056	6.68	9.174	0.096*
		25.8	0.832*	0.676*	0.76*	1.444*	2.256	4.056	6.68	9.074	0.096*
		25.9	0.832*	0.776*	0.86*	1.544*	2.356	3.956	6.58	8.974	0.096*
		26	0.832*	0.776*	0.76*	1.444*	2.356	3.856	6.68	9.074	0.196*
		26.1	0.632*	0.676*	0.76*	1.444*	2.356	3.856	6.68	9.174	0.196*
		26.2	0.632*	0.676*	0.76*	1.444*	2.356	3.856	6.68	9.174	0.096*
		26.3	0.632*	0.776*	0.86*	1.444*	2.356	3.856	6.68	9.074	0.096*
		26.4	0.632*	0.776*	0.76*	1.444*	2.356	3.856	6.68	9.074	0.196*
		26.5	0.632*	0.776*	0.76*	1.444*	2.456	3.956	6.68	9.174	0.196*
		26.6	0.632*	0.776*	0.76*	1.444*	2.456	3.956	6.68	9.174	0.196*
		26.7	0.732*	0.776*	0.86*	1.644*	2.356	3.856	6.68	9.174	0.196*
		26.8	0.732*	0.776*	0.86*	1.544*	2.256	3.856	6.68	9.174	0.196*
		26.9	0.732*	0.776*	0.86*	1.544*	2.256	3.856	6.68	9.174	0.196*
		27	0.732*	0.876*	0.86*	1.544*	2.256	3.856	6.48	9.074	0.096*
		27.1	0.732*	0.876*	0.86*	1.544*	2.256	3.956	6.48	9.074	0.096*
		27.2	0.632*	0.776*	0.96*	1.544*	2.356	3.956	6.58	9.174	0.096*
		27.3	0.632*	0.776*	0.86*	1.544*	2.356	3.956	6.58	9.174	0.196*
		27.4	0.732*	0.876*	0.86*	1.644*	2.356	3.956	6.58	9.174	0.196*
		27.5	0.732*	0.876*	0.86*	1.544*	2.356	3.856	6.58	9.074	0.196*
		27.6	0.632*	0.776*	0.86*	1.544*	2.356	3.956	6.68	9.174	0.196*
		27.7	0.632*	0.776*	0.76*	1.444*	2.356	3.956	6.68	9.274	0.196*
		27.8	0.632*	0.776*	0.66*	1.544*	2.356	4.056	6.58	9.074	0.096*
		27.9	0.632*	0.676*	0.76*	1.544*	2.356	4.056	6.58	9.074	0.096*
		28	0.532*	0.576*	0.66*	1.444*	2.356	4.056	6.58	9.174	0.096*
		28.1	0.432*	0.576*	0.66*	1.444*	2.256	4.056	6.58	9.174	0.096*
		28.2	0.532*	0.576*	0.66*	1.444*	2.356	4.056	6.58	9.174	0.196*
		28.3	0.532*	0.576*	0.66*	1.544*	2.356	4.156	6.58	9.174	0.196*
		28.4	0.532*	0.576*	0.66*	1.544*	2.356	4.056	6.58	9.174	0.096*
		28.5	0.532*	0.576*	0.66*	1.544*	2.256	3.956	6.68	9.274	0.096*
		28.6	0.432*	0.476*	0.66*	1.444*	2.356	4.056	6.68	9.274	0.096*
		28.7	0.432*	0.476*	0.66*	1.544*	2.356	4.056	6.68	9.274	0.196*
		28.8	0.432*	0.476*	0.56*	1.544*	2.456	4.156	6.58	9.174	-0.004*
		28.9	0.432*	0.476*	0.56*	1.444*	2.456	4.156	6.68	9.274	-0.004*
		29	0.432*	0.376*	0.56*	1.344*	2.556	4.156	6.68	9.274	-0.004*
		29.1	0.532*	0.576*	0.56*	1.344*	2.556	4.156	6.58	9.174	0.096*
		29.2	0.532*	0.576*	0.36*	1.344*	2.556	4.056	6.58	9.174	0.096*
		29.3	0.632*	0.476*	0.46*	1.444*	2.256	3.856	6.68	9.174	-0.004*
		29.4	0.432*	0.176*	0.46*	1.344*	2.756	4.256	6.58	9.174	-0.304*
		29.5	0.232*	-0.024*	0.26*	1.044*	2.556	4.156	6.38	8.874	-0.304*
		29.6	-0.268*	-0.124*	0.16*	0.644*	2.756	4.356	6.48	8.774	-0.204*
		29.7	-1.668*	-1.324*	0.06*	0.244*	2.456	4.056	6.58	8.974	-1.204*
		29.8	0.332*	0.676*	0.36*	0.744*	2.756	4.756	6.18	8.174	0.396*
		29.9	1.032*	1.076*	0.66*	1.644*	0.956	2.856	6.48	9.474	0.096*
		30	-4.768*	-4.724*	-2.64*	0.944*	-2.044	-1.444	1.18	7.774	-6.304*
		30.1	-7.368*	-6.224*	-1.24*	-0.456*	2.156	3.556	0.28	0.974	-5.704*
		30.2	-4.068*	-3.324*	0.36*	0.944*	3.456	5.356	1.78	4.074	-3.604*
		30.3	-1.868*	-1.924*	0.66*	1.344*	2.756	4.456	2.98	5.674	-2.604*
		30.4	-0.868*	-1.024*	1.06*	1.244*	2.656	4.056	3.88	6.374	-1.604*
		30.5	-0.268*	-0.424*	0.86*	1.344*	2.156	3.456	4.38	7.074	-0.904*
		30.6	0.032*	-0.024*	0.96*	1.344*	1.756	3.256	4.98	7.074	-1.104*
		30.7	-0.268*	-0.624*	0.86*	1.744*	1.956	3.056	4.78	7.274	-0.904*
		30.8	-0.068*	-0.124*	0.56*	1.144*	2.156	3.756	4.98	7.374	-0.604*
		30.9	0.032*	0.076*	0.66*	1.344*	2.056	3.456	5.48	7.574	-0.504*
		31	0.032*	-0.024*	0.76*	1.344*	2.056	3.256	4.98	7.074	-0.604*
		31.1	0.032*	-0.024*	0.56*	1.244*	1.856	3.156	4.98	7.374	-0.304*
		31.2	0.232*	0.076*	0.66*	1.544*	1.856	3.256	4.98	7.074	-0.404*
		31.3	0.232*	0.276*	0.86*	1.344*	1.956	3.156	5.08	6.974	-0.504*
		31.4	0.232*	-0.224*	0.86*	1.344*	1.956	3.056	4.98	6.874	-0.504*
		31.5	0.232*	0.176*	0.76*	1.244*	1.856	3.056	4.88	6.774	-0.204*
		31.6	0.232*	0.276*	0.76*	1.244*	1.656	2.856	4.78	6.574	-0.304*
		31.7	0.332*	0.276*	0.76*	1.144*	1.356	2.656	4.68	6.474	-0.204*
		31.8	0.332*	0.276*	0.76*	1.044*	1.256	2.556	4.78	6.474	-0.304*
		31.9	0.332*	0.176*	0.66*	1.044*	1.556	2.756	4.68	6.374	-0.304*
		32	0.332*	0.076*	0.66*	1.044*	1.556	2.756	4.58	6.274	-0.304*
		32.1	0.232*	0.076*	0.76*	1.044*	1.556	2.656	4.58	6.274	-0.304*
		32.2	0.232*	0.176*	0.56*	0.944*	1.456	2.656	4.48	6.274	-0.304*
		32.3	0.032*	-0.024*	0.76*	1.144*	1.356	2.556	4.38	6.374	-0.404*
		32.4	0.132*	0.076*	0.66*	1.044*	1.556	2.656	4.28	5.974	-0.404*
		32.5	0.332*	0.176*	0.76*	1.144*	1.556	2.656	4.28	5.774	-0.504*
		32.6	0.332*	0.176*	0.66*	1.144*	1.456	2.456	4.08	5.774	-0.404*
		32.7	0.232*	0.176*	0.66*	1.044*	1.356	2.456	3.88	5.574	-0.504*
		32.8	0.432*	0.176*	0.56*	1.044*	1.356	2.456	4.08	5.674	-0.404*
		32.9	0.232*	0.176*	0.66*	1.144*	1.356	2.456	3.98	5.574	-0.304*
		33	0.232*	0.176*	0.66*	0.944*	1.256	2.156	3.78	5.374	-0.304*
		33.1	0.232*	0.176*	0.56*	1.044*	1.356	2.156	3.68	5.074	-0.304*
		33.2	0.332*	0.376*	0.66*	0.944*	1.256	2.256	3.58	4.974	-0.304*
		33.3	0.232*	0.176*	0.66*	1.044*	1.356	2.356	3.58	4.874	-0.104*
		33.4	0.232*	0.176*	0.66*	1.044*	1.256	2.356	3.48	5.074	-0.104*
		33.5	0.332*	0.176*	0.56*	1.044*	1.256	2.156	3.48	4.974	-0.104*
		33.6	0.332*	0.176*	0.56*	1.044*	1.156	2.056	3.38	4.774	-0.104*
		33.7	0.232*	0.176*	0.56*	0.944*	1.256	2.156	3.28	4.674	-0.204*
		33.8	0.232*	0.176*	0.46*	0.944*	1.156	2.056	3.28	4.574	-0.104*
		33.9	0.232*	0.176*	0.46*	0.944*	1.156	1.956	3.28	4.474	-0.104*
		34	0.232*	0.276*	0.46*	1.044*	1.156	1.956	3.18	4.374	-0.004*
		34.1	0.232*	0.176*	0.36*	0.944*	1.056	1.956	3.08	4.274	-0.004*
		34.2	0.232*	0.176*	0.36*	0.844*	1.056	1.956	2.98	4.174	-0.204*
		34.3	0.132*	0.076*	0.36*	0.844*	1.056	1.856	2.98	4.074	-0.204*
		34.4	0.232*	0.076*	0.36*	0.844*	1.056	1.856	2.88	3.974	-0.204*
		34.5	0.232*	0.076*	0.26*	0.744*	1.056	1.856	2.88	3.974	-0.104*
		34.6	0.232*	0.076*	0.26*	0.744*	1.056	1.756	2.88	3.874	-0.204*
		34.7	0.232*	0.076*	0.26*	0.744*	1.056	1.756	2.78	3.774	-0.004*
		34.8	0.332*	0.176*	0.26*	0.744*	0.856	1.656	2.78	3.674	-0.104*
		34.9	0.332*	0.176*	0.26*	0.644*	0.856	1.556	2.78	3.674	-0.104*
		35	0.332*	0.176*	0.26*	0.644*	0.856	1.456	2.68	3.674	-0.104*
		35.1	0.332*	0.176*	0.26*	0.544*	0.856	1.456	2.68	3.574	-0.004*
		35.2	0.332*	0.176*	0.16*	0.544*	0.856	1.356	2.58	3.474	-0.004*
		35.3	0.332*	0.276*	0.16*	0.544*	0.956	1.456	2.58	3.474	-0.004*
		35.4	0.332*	0.276*	0.06*	0.444*	0.956	1.456	2.58	3.574	-0.104*
		35.5	0.332*	0.276*	0.26*	0.544*	0.856	1.356	2.58	3.374	-0.004*
		35.6	0.432*	0.376*	0.16*	0.344*	0.756	1.456	2.58	3.374	-0.004*
		35.7	0.432*	0.276*	0.16*	0.544*	0.756	1.356	2.48	3.274	-0.104*
		35.8	0.332*	0.276*	0.16*	0.544*	0.756	1.356	2.38	3.174	-0.104*
		35.9	0.232*	0.276*	0.16*	0.444*	0.856	1.456	2.38	3.174	-0.004*
		36	0.332*	0.176*	0.16*	0.544*	0.856	1.356	2.48	3.274	-0.004*
		36.1	0.332*	0.176*	0.16*	0.544*	0.856	1.356	2.48	3.174	-0.004*
		36.2	0.432*	0.176*	0.16*	0.544*	0.856	1.356	2.38	3.074	-0.004*
		36.3	0.432*	0.176*	0.26*	0.644*	0.756	1.256	2.38	3.174	-0.104*
		36.4	0.332*	0.176*	0.36*	0.544*	0.756	1.156	2.38	3.074	-0.004*
		36.5	0.432*	0.276*	0.26*	0.544*	0.856	1.256	2.38	3.074	-0.104*
		36.6	0.332*	0.176*	0.36*	0.544*	0.756	1.056	2.28	2.974	-0.004*
		36.7	0.332*	0.176*	0.16*	0.544*	0.756	1.056	2.28	2.974	-0.004*
		36.8	0.332*	0.076*	0.36*	0.544*	0.856	0.956	2.38	3.074	-0.004*
		36.9	0.432*	0.176*	0.36*	0.544*	0.756	1.056	2.28	3.074	-0.104*
		37	0.332*	0.076*	0.26*	0.444*	0.656	0.856	2.38	3.174	-0.004*
		37.1	0.432*	0.276*	0.36*	0.644*	0.756	0.956	2.28	3.074	-0.104*
		37.2	0.432*	0.176*	0.36*	0.644*	0.656	0.856	2.18	2.974	-0.004*
		37.3	0.332*	0.176*	0.26*	0.444*	0.556	0.856	2.18	2.974	-0.004*
		37.4	0.332*	0.176*	0.26*	0.544*	0.656	0.956	2.08	2.874	0.096*
		37.5	0.332*	0.076*	0.16*	0.444*	0.556	0.856	2.08	2.874	-0.004*
		37.6	0.332*	0.176*	0.16*	0.344*	0.356	0.756	1.88	2.774	0.096*
		37.7	0.432*	0.076*	0.16*	0.444*	0.456	0.856	1.98	2.774	0.196*
		37.8	0.432*	0.176*	0.16*	0.344*	0.456	0.856	1.88	2.674	0.096*
		37.9	0.432*	0.176*	0.16*	0.344*	0.456	0.956	1.88	2.674	-0.004*
		38	0.432*	0.176*	0.16*	0.244*	0.456	0.956	1.68	2.474	-0.004*
		38.1	0.432*	0.076*	0.06*	0.344*	0.356	0.856	1.68	2.574	0.096*
		38.2	0.332*	0.176*	0.26*	0.344*	0.556	0.956	1.58	2.374	-0.004*
		38.3	0.432*	0.076*	0.06*	0.344*	0.356	0.856	1.78	2.574	-0.104*
		38.4	0.532*	0.276*	0.16*	0.244*	0.556	0.956	1.58	2.374	0.096*
		38.5	0.532*	0.176*	0.06*	0.344*	0.356	0.856	1.68	2.474	-0.104*
		38.6	0.632*	0.176*	0.16*	0.244*	0.556	0.856	1.58	2.274	-0.004*
		38.7	0.532*	0.276*	0.26*	0.344*	0.356	0.856	1.48	2.274	-0.104*
		38.8	0.532*	0.176*	0.16*	0.244*	0.556	0.956	1.58	2.274	-0.104*
		38.9	0.532*	0.176*	0.26*	0.344*	0.456	0.856	1.48	2.274	-0.104*
		39	0.632*	0.276*	0.16*	0.344*	0.456	0.856	1.48	2.274	-0.004*
		39.1	0.432*	0.176*	0.16*	0.344*	0.356	0.856	1.68	2.274	-0.104*
		39.2	0.632*	0.176*	0.16*	0.344*	0.356	0.756	1.48	2.174	-0.004*
		39.3	0.432*	0.176*	0.16*	0.344*	0.356	0.856	1.58	2.274	-0.104*
		39.4	0.532*	0.176*	0.16*	0.344*	0.356	0.856	1.48	2.074	0.096*
		39.5	0.432*	0.176*	0.06*	0.244*	0.256	0.756	1.48	2.074	-0.004*
		39.6	0.532*	0.176*	-0.04*	0.244*	0.356	0.856	1.58	2.174	-0.004*
		39.7	0.432*	0.076*	0.06*	0.244*	0.256	0.656	1.38	1.974	0.096*
		39.8	0.432*	0.176*	0.06*	0.344*	0.356	0.656	1.58	2.074	-0.004*
		39.9	0.432*	0.176*	-0.04*	0.144*	0.356	0.756	1.38	1.974	0.096*
		40	0.532*	0.176*	0.06*	0.144*	0.256	0.556	1.38	1.874	-0.004*
		40.1	0.332*	0.076*	-0.14*	0.144*	0.256	0.556	1.38	1.974	0.096*
		40.2	0.432*	0.176*	-0.04*	0.144*	0.256	0.456	1.38	1.874	-0.004*
		40.3	0.432*	0.076*	0.06*	0.244*	0.156	0.556	1.38	1.774	0.096*
		40.4	0.332*	0.076*	0.06*	0.244*	0.156	0.356	1.18	1.674	0.096*
		40.5	0.432*	0.076*	0.06*	0.244*	0.256	0.456	1.18	1.774	-0.104*
		40.6	0.332*	0.076*	0.06*	0.244*	0.056	0.256	1.28	1.774	-0.004*
		40.7	0.532*	0.176*	0.06*	0.344*	0.256	0.356	1.08	1.674	-0.004*
		40.8	0.432*	0.076*	-0.04*	0.144*	0.256	0.356	1.18	1.774	-0.004*
		40.9	0.332*	0.076*	0.06*	0.244*	0.056	0.256	1.18	1.774	-0.204*
		41	0.532*	0.176*	0.26*	0.344*	0.256	0.356	0.98	1.574	-0.004*
		41.1	0.432*	0.076*	0.16*	0.344*	0.056	0.256	1.08	1.674	-0.104*
		41.2	0.532*	0.176*	0.16*	0.244*	0.056	0.256	0.98	1.574	-0.104*
		41.3	0.532*	0.176*	0.26*	0.244*	0.156	0.356	0.98	1.574	-0.004*
		41.4	0.532*	0.176*	0.16*	0.244*	0.156	0.356	0.98	1.574	-0.104*
		41.5	0.432*	0.076*	0.16*	0.144*	0.256	0.256	0.88	1.474	-0.004*
		41.6	0.532*	0.276*	0.26*	0.344*	0.156	0.256	0.88	1.574	-0.004*
		41.7	0.432*	0.076*	0.16*	0.244*	0.056	0.256	0.98	1.474	-0.104*
		41.8	0.532*	0.276*	0.26*	0.244*	0.056	0.156	0.88	1.474	-0.204*
		41.9	0.532*	0.276*	0.26*	0.244*	0.156	0.256	0.88	1.474	-0.004*
		42	0.532*	0.176*	0.16*	0.244*	0.156	0.156	0.88	1.374	-0.104*
		42.1	0.432*	0.176*	0.06*	0.044*	0.256	0.256	0.88	1.474	-0.004*
		42.2	0.532*	0.276*	0.16*	0.144*	0.256	0.256	0.88	1.374	-0.204*
		42.3	0.532*	0.176*	0.16*	0.144*	0.156	0.156	0.78	1.274	-0.104*
		42.4	0.532*	0.276*	0.06*	0.044*	0.156	0.256	0.68	1.274	-0.004*
		42.5	0.532*	0.276*	0.06*	0.144*	0.256	0.256	0.78	1.374	-0.204*
		42.6	0.432*	0.176*	0.16*	0.144*	0.156	0.156	0.78	1.174	-0.104*
		42.7	0.532*	0.376*	0.06*	0.044*	0.256	0.256	0.68	1.274	-0.104*
		42.8	0.532*	0.276*	0.16*	0.044*	0.256	0.256	0.58	1.174	-0.204*
		42.9	0.332*	0.276*	0.16*	0.144*	0.156	0.156	0.78	1.174	-0.104*
		43	0.332*	0.276*	0.06*	0.044*	0.156	0.156	0.68	1.274	-0.204*
		43.1	0.432*	0.276*	-0.04*	0.044*	0.256	0.356	0.58	1.074	-0.304*
		43.2	0.432*	0.376*	-0.04*	0.044*	0.256	0.256	0.68	1.174	-0.104*
		43.3	0.332*	0.176*	0.06*	0.044*	0.156	0.256	0.68	1.174	-0.304*
		43.4	0.432*	0.276*	0.06*	-0.056*	0.256	0.256	0.48	1.074	-0.304*
		43.5	0.332*	0.176*	-0.04*	0.044*	0.156	0.256	0.58	0.974	-0.404*
		43.6	0.332*	0.176*	-0.04*	0.044*	0.256	0.256	0.68	1.074	-0.204*
		43.7	0.432*	0.276*	0.06*	-0.056*	0.356	0.456	0.48	0.974	-0.304*
		43.8	0.332*	0.176*	-0.04*	0.044*	0.256	0.356	0.58	0.974	-0.404*
		43.9	0.332*	0.176*	-0.04*	-0.056*	0.256	0.356	0.58	0.974	-0.304*
		44	0.332*	0.176*	0.06*	0.044*	0.056	0.256	0.48	0.874	-0.204*
		44.1	0.232*	0.176*	0.06*	0.044*	0.256	0.356	0.58	0.874	-0.304*
		44.2	0.232*	0.276*	-0.04*	-0.056*	0.256	0.456	0.58	0.974	-0.404*
		44.3	0.232*	0.076*	0.06*	0.044*	0.256	0.356	0.58	0.874	-0.304*
		44.4	0.232*	0.176*	0.06*	0.044*	0.256	0.356	0.58	0.774	-0.304*
		44.5	0.232*	0.176*	0.06*	-0.056*	0.256	0.356	0.48	0.774	-0.404*
		44.6	0.232*	0.276*	0.16*	0.044*	0.256	0.356	0.68	0.874	-0.404*
		44.7	0.332*	0.176*	0.06*	0.044*	0.256	0.356	0.48	0.774	-0.204*
		44.8	0.232*	0.176*	0.06*	-0.056*	0.256	0.356	0.58	0.674	-0.204*
		44.9	0.232*	0.276*	-0.04*	-0.156*	0.256	0.356	0.68	0.874	-0.404*
		45	0.332*	0.176*	0.06*	-0.156*	0.256	0.356	0.48	0.774	-0.204*
		45.1	0.232*	0.076*	0.16*	0.044*	0.156	0.356	0.58	0.674	-0.204*
		45.2	0.232*	0.176*	0.06*	0.044*	0.156	0.356	0.58	0.674	-0.304*
		45.3	0.232*	0.276*	0.16*	-0.056*	0.156	0.356	0.58	0.774	-0.404*
		45.4	0.332*	0.276*	0.16*	0.044*	0.156	0.256	0.58	0.774	-0.304*
		45.5	0.232*	0.076*	0.16*	0.044*	0.156	0.356	0.58	0.674	-0.204*
		45.6	0.232*	0.276*	0.16*	-0.056*	0.056	0.256	0.58	0.674	-0.104*
		45.7	0.332*	0.276*	0.16*	-0.056*	-0.044	0.156	0.68	0.774	-0.204*
		45.8	0.232*	0.076*	-0.04*	-0.056*	0.156	0.256	0.58	0.674	-0.304*
		45.9	0.232*	0.176*	0.16*	0.044*	0.156	0.356	0.58	0.674	-0.204*
		46	0.132*	0.176*	0.16*	-0.056*	-0.044	0.256	0.68	0.774	-0.104*
		46.1	0.132*	0.176*	0.16*	-0.056*	-0.044	0.156	0.58	0.774	-0.204*
		46.2	0.232*	0.076*	0.06*	-0.056*	0.056	0.156	0.48	0.674	-0.304*
		46.3	0.232*	0.176*	0.16*	0.044*	0.156	0.356	0.58	0.574	-0.204*
		46.4	0.132*	0.076*	0.06*	-0.056*	0.056	0.156	0.58	0.774	-0.204*
		46.5	0.132*	0.176*	0.06*	-0.056*	0.056	0.156	0.58	0.774	-0.204*
		46.6	0.232*	0.076*	0.06*	-0.056*	0.056	0.156	0.48	0.674	-0.304*
		46.7	0.232*	0.176*	0.06*	0.044*	0.156	0.356	0.58	0.674	-0.104*
		46.8	0.132*	0.076*	0.06*	0.044*	0.156	0.356	0.58	0.674	-0.204*
		46.9	0.132*	0.076*	0.16*	0.044*	0.056	0.156	0.58	0.674	-0.204*
		47	0.132*	-0.024*	-0.04*	-0.056*	0.056	0.156	0.58	0.774	-0.204*
		47.1	0.132*	0.076*	-0.04*	-0.056*	0.056	0.256	0.58	0.674	-0.004*
		47.2	0.132*	0.076*	-0.04*	-0.056*	0.056	0.256	0.58	0.674	-0.104*
		47.3	0.132*	0.076*	0.06*	0.044*	0.156	0.256	0.48	0.674	-0.204*
		47.4	0.232*	-0.024*	0.06*	0.144*	0.056	0.256	0.58	0.774	-0.104*
		47.5	0.132*	0.076*	0.06*	-0.056*	0.056	0.256	0.58	0.774	-0.104*
		47.6	0.132*	0.076*	-0.04*	-0.056*	0.056	0.256	0.58	0.674	-0.204*
		47.7	0.132*	0.076*	-0.04*	-0.056*	0.156	0.256	0.48	0.574	-0.204*
		47.8	0.132*	-0.024*	-0.04*	-0.056*	0.156	0.256	0.58	0.774	-0.104*
		47.9	0.132*	-0.024*	0.06*	-0.056*	0.056	0.256	0.58	0.774	-0.104*
		48	0.132*	0.076*	0.06*	-0.056*	0.056	0.256	0.48	0.674	-0.204*
		48.1	0.132*	0.076*	-0.04*	0.044*	0.056	0.256	0.48	0.674	-0.204*
		48.2	0.132*	0.076*	-0.04*	0.044*	0.256	0.356	0.48	0.674	-0.104*
		48.3	0.132*	0.076*	-0.04*	-0.156*	0.256	0.356	0.48	0.674	-0.204*
		48.4	0.132*	-0.024*	0.06*	-0.056*	0.156	0.256	0.48	0.774	-0.204*
		48.5	0.032*	-0.024*	-0.04*	0.044*	0.156	0.256	0.48	0.674	-0.204*
		48.6	0.132*	0.076*	-0.04*	0.044*	0.156	0.356	0.48	0.674	-0.104*
		48.7	0.132*	0.076*	-0.14*	-0.056*	0.156	0.456	0.38	0.574	-0.204*
		48.8	0.132*	-0.024*	-0.04*	0.044*	0.056	0.256	0.38	0.674	-0.204*
		48.9	0.132*	-0.024*	0.06*	0.144*	0.156	0.256	0.48	0.674	-0.204*
		49	0.132*	0.076*	0.06*	0.044*	0.156	0.256	0.38	0.574	-0.204*
		49.1	0.132*	0.076*	-0.04*	-0.056*	0.256	0.356	0.38	0.574	-0.204*
		49.2	0.232*	0.176*	-0.04*	-0.056*	0.056	0.356	0.38	0.674	-0.204*
		49.3	0.132*	-0.024*	-0.04*	-0.056*	0.056	0.356	0.38	0.674	-0.204*
		49.4	0.132*	-0.024*	-0.04*	0.044*	0.156	0.256	0.38	0.674	-0.204*
		49.5	0.032*	-0.024*	0.06*	0.044*	0.156	0.256	0.38	0.574	-0.104*
		49.6	0.132*	0.176*	-0.04*	-0.056*	0.156	0.256	0.38	0.574	-0.104*
		49.7	0.132*	0.076*	-0.04*	-0.056*	0.156	0.256	0.38	0.574	-0.104*
		49.8	0.132*	0.076*	-0.04*	-0.056*	0.056	0.256	0.28	0.574	-0.304*
		49.9	0.132*	0.076*	0.06*	0.044*	0.156	0.256	0.28	0.574	-0.304*
		50	0.132*	0.076*	0.06*	-0.056*	0.056	0.156	0.28	0.474	-0.204*
		50.1	0.332*	0.176*	0.06*	-0.056*	0.056	0.156	0.38	0.574	-0.304*
		50.2	0.132*	0.076*	-0.04*	-0.056*	0.056	0.156	0.38	0.574	-0.204*
		50.3	0.132*	0.076*	-0.04*	0.044*	0.256	0.256	0.28	0.574	-0.204*
		50.4	0.132*	0.076*	0.06*	0.044*	0.256	0.256	0.28	0.574	-0.204*
		50.5	0.132*	0.076*	-0.04*	-0.156*	0.056	0.156	0.28	0.474	-0.204*
		50.6	0.132*	0.076*	0.06*	-0.056*	0.056	0.156	0.28	0.474	-0.204*
		50.7	0.232*	0.076*	0.06*	-0.056*	0.056	0.156	0.28	0.474	-0.304*
		50.8	0.132*	-0.024*	0.06*	-0.056*	0.056	0.156	0.28	0.474	-0.404*
		50.9	0.132*	0.076*	0.06*	-0.056*	0.056	0.156	0.28	0.574	-0.304*
		51	0.132*	0.076*	0.06*	0.044*	0.056	0.156	0.28	0.474	-0.204*
		51.1	0.132*	0.076*	0.06*	-0.056*	-0.044	0.156	0.28	0.474	-0.204*
		51.2	0.232*	-0.024*	0.06*	-0.056*	0.056	0.156	0.18	0.374	-0.204*
		51.3	0.132*	-0.124*	-0.04*	-0.156*	0.056	0.056	0.18	0.374	-0.304*
		51.4	0.132*	-0.024*	0.06*	-0.056*	0.056	0.056	0.18	0.474	-0.204*
		51.5	0.132*	0.076*	-0.04*	-0.156*	0.056	0.156	0.28	0.474	-0.304*
		51.6	0.132*	0.076*	-0.04*	-0.156*	0.056	0.156	0.28	0.474	-0.304*
		51.7	0.132*	-0.024*	-0.04*	-0.056*	0.056	0.056	0.28	0.474	-0.304*
		51.8	0.232*	0.076*	0.06*	-0.056*	0.056	0.056	0.28	0.474	-0.204*
		51.9	0.232*	-0.024*	0.06*	-0.156*	-0.044	-0.044	0.18	0.374	-0.104*
		52	0.232*	-0.024*	0.16*	-0.056*	0.056	0.156	0.18	0.374	-0.104*
		52.1	0.132*	-0.024*	0.16*	-0.056*	0.056	0.156	0.18	0.374	-0.304*
		52.2	0.132*	-0.024*	0.06*	-0.056*	0.056	0.056	0.18	0.374	-0.304*
		52.3	0.032*	-0.124*	-0.04*	-0.056*	-0.044	0.056	0.28	0.474	-0.304*
		52.4	0.132*	-0.024*	0.06*	-0.056*	-0.044	0.056	0.28	0.474	-0.304*
		52.5	0.232*	-0.024*	0.06*	-0.156*	0.056	0.056	0.28	0.374	-0.304*
		52.6	0.232*	-0.124*	0.06*	-0.156*	0.056	0.156	0.18	0.274	-0.304*
		52.7	0.132*	-0.224*	0.06*	-0.156*	0.056	0.056	0.18	0.374	-0.104*
		52.8	0.032*	-0.224*	0.06*	-0.056*	0.056	0.056	0.18	0.374	-0.204*
		52.9	0.032*	-0.224*	0.06*	-0.056*	0.056	0.056	0.18	0.374	-0.204*
		53	0.032*	-0.224*	0.06*	-0.056*	0.056	0.056	0.28	0.474	-0.304*
		53.1	0.132*	-0.124*	0.06*	-0.056*	0.056	0.056	0.28	0.374	-0.304*
		53.2	0.232*	-0.124*	-0.14*	-0.256*	0.056	0.056	0.28	0.374	-0.304*
		53.3	0.232*	-0.124*	-0.04*	-0.056*	0.156	0.156	0.18	0.374	-0.204*
		53.4	0.032*	-0.224*	0.06*	-0.056*	0.056	0.056	0.18	0.374	-0.304*
		53.5	0.032*	-0.224*	0.06*	-0.056*	0.056	0.056	0.18	0.374	-0.204*
		53.6	0.032*	-0.224*	0.06*	-0.056*	0.056	0.056	0.18	0.274	-0.204*
		53.7	0.032*	-0.224*	0.16*	0.044*	0.156	0.056	0.28	0.374	-0.204*
		53.8	0.232*	-0.124*	0.06*	-0.056*	0.156	0.056	0.28	0.274	-0.304*
		53.9	0.132*	-0.224*	0.06*	-0.156*	-0.044	-0.044	0.28	0.274	-0.304*
		54	0.032*	-0.124*	0.06*	-0.056*	0.056	0.056	0.28	0.274	-0.204*
		54.1	0.032*	-0.124*	0.16*	-0.056*	0.056	0.056	0.28	0.374	-0.304*
		54.2	0.032*	-0.124*	0.16*	0.044*	0.056	0.056	0.18	0.274	-0.204*
		54.3	0.032*	-0.124*	0.16*	0.044*	0.056	0.056	0.28	0.274	-0.204*
		54.4	0.032*	-0.024*	0.06*	-0.056*	0.156	0.156	0.28	0.274	-0.204*
		54.5	0.132*	-0.024*	0.06*	0.044*	0.056	0.056	0.28	0.274	-0.204*
		54.6	0.032*	-0.024*	0.16*	0.144*	0.056	0.156	0.28	0.274	-0.304*
		54.7	0.032*	-0.024*	0.16*	0.144*	0.056	0.156	0.28	0.274	-0.304*
		54.8	0.032*	-0.024*	0.06*	0.044*	0.056	0.056	0.28	0.274	-0.104*
		54.9	0.032*	0.076*	0.06*	0.044*	0.056	0.056	0.28	0.274	-0.204*
		55	0.132*	0.076*	0.06*	-0.056*	0.156	0.056	0.28	0.274	-0.204*
		55.1	0.132*	-0.024*	0.16*	0.144*	0.156	0.156	0.18	0.174	-0.204*
		55.2	0.232*	0.076*	0.16*	0.144*	0.156	0.156	0.18	0.174	-0.204*
		55.3	0.132*	-0.024*	0.16*	0.144*	0.056	0.156	0.38	0.274	-0.104*
		55.4	0.032*	-0.024*	0.16*	0.144*	0.056	0.156	0.38	0.274	-0.104*
		55.5	0.132*	0.076*	0.26*	0.144*	0.056	0.156	0.38	0.274	-0.104*
		55.6	0.132*	0.076*	0.16*	0.044*	0.156	0.156	0.38	0.274	-0.104*
		55.7	0.132*	0.076*	0.16*	0.044*	0.256	0.256	0.38	0.274	-0.104*
		55.8	0.132*	-0.024*	0.16*	0.044*	0.156	0.156	0.38	0.174	-0.104*
		55.9	0.132*	0.076*	0.16*	0.144*	0.156	0.156	0.28	0.274	-0.104*
		56	-0.068*	-0.024*	0.16*	0.144*	0.056	0.156	0.28	0.274	-0.104*
		56.1	0.132*	0.076*	0.06*	-0.056*	0.056	0.156	0.38	0.374	-0.104*
		56.2	0.132*	0.076*	0.16*	0.044*	0.156	0.156	0.38	0.274	-0.104*
		56.3	0.132*	0.076*	0.16*	0.044*	0.056	0.056	0.38	0.274	-0.104*
		56.4	0.132*	0.076*	0.16*	0.044*	0.056	0.056	0.38	0.274	-0.004*
		56.5	0.032*	0.076*	0.16*	0.044*	0.056	0.056	0.28	0.174	-0.004*
		56.6	0.032*	-0.024*	0.16*	0.144*	0.056	0.056	0.38	0.174	-0.004*
		56.7	0.032*	0.076*	-0.04*	0.044*	0.156	0.256	0.38	0.174	-0.104*
		56.8	0.132*	0.076*	-0.04*	0.044*	0.256	0.256	0.48	0.274	-0.104*
		56.9	0.132*	0.076*	0.06*	0.044*	0.156	0.256	0.38	0.274	-0.104*
		57	0.132*	0.176*	0.06*	0.044*	0.056	0.056	0.38	0.374	-0.004*
		57.1	0.032*	0.076*	0.06*	-0.056*	0.056	0.056	0.38	0.374	-0.004*
		57.2	0.032*	-0.024*	0.06*	-0.056*	0.056	0.056	0.38	0.374	-0.004*
		57.3	0.132*	-0.024*	-0.04*	-0.156*	0.056	0.056	0.28	0.274	-0.004*
		57.4	0.132*	-0.024*	-0.04*	-0.056*	0.156	0.256	0.28	0.274	-0.004*
		57.5	0.232*	0.076*	0.06*	0.044*	0.256	0.256	0.38	0.174	-0.104*
		57.6	0.132*	-0.024*	-0.04*	0.044*	0.156	0.256	0.28	0.174	-0.104*
		57.7	0.032*	-0.024*	0.06*	0.044*	0.056	0.156	0.28	0.174	-0.104*
		57.8	0.032*	-0.024*	0.06*	0.044*	0.056	0.156	0.28	0.274	-0.004*
		57.9	0.032*	0.076*	0.06*	-0.056*	0.056	0.156	0.38	0.374	-0.004*
		58	0.032*	0.076*	0.06*	-0.056*	0.156	0.256	0.28	0.274	-0.004*
		58.1	0.132*	0.076*	-0.04*	-0.056*	0.156	0.156	0.28	0.274	-0.004*
		58.2	0.032*	-0.124*	-0.14*	-0.056*	0.156	0.156	0.38	0.274	-0.104*
		58.3	0.032*	-0.124*	-0.04*	0.044*	-0.044	0.056	0.38	0.174	-0.104*
		58.4	0.032*	-0.124*	-0.04*	0.044*	-0.044	0.056	0.38	0.274	-0.004*
		58.5	0.132*	-0.024*	0.06*	-0.056*	-0.044	0.056	0.38	0.274	0.096*
		58.6	0.132*	-0.024*	0.06*	0.044*	0.156	0.256	0.38	0.374	-0.004*
		58.7	0.032*	-0.024*	0.06*	0.044*	0.156	0.256	0.38	0.374	-0.104*
		58.8	0.032*	-0.024*	0.06*	0.044*	0.156	0.156	0.38	0.374	-0.104*
		58.9	0.132*	-0.124*	0.06*	0.044*	0.156	0.156	0.38	0.374	-0.104*
		59	0.132*	-0.124*	0.06*	0.044*	0.056	0.056	0.28	0.274	-0.104*
		59.1	0.032*	-0.124*	-0.04*	-0.156*	0.056	0.056	0.28	0.274	-0.104*
		59.2	0.032*	-0.124*	0.06*	-0.156*	0.156	0.156	0.38	0.274	-0.004*
		59.3	-0.068*	-0.224*	-0.04*	-0.056*	0.056	0.156	0.28	0.274	0.096*
		59.4	-0.068*	-0.224*	-0.04*	-0.056*	0.056	0.056	0.38	0.374	-0.004*
		59.5	0.132*	-0.024*	-0.04*	-0.056*	0.056	0.056	0.38	0.374	-0.104*
		59.6	0.132*	-0.024*	0.06*	0.044*	0.056	0.056	0.38	0.374	-0.104*
		59.7	0.132*	-0.024*	0.06*	0.044*	0.056	0.056	0.38	0.474	-0.104*
		59.8	0.132*	-0.124*	0.06*	0.044*	-0.044	0.056	0.38	0.374	-0.104*
		59.9	0.132*	-0.124*	-0.04*	-0.056*	0.056	0.056	0.38	0.374	-0.104*
		60	0.032*	-0.224*	-0.04*	-0.056*	0.056	0.056	0.38	0.274	-0.104*
		60.1	0.032*	-0.224*	-0.04*	-0.056*	0.056	0.056	0.38	0.274	-0.204*
		60.2	0.032*	-0.224*	-0.04*	-0.056*	0.056	0.056	0.38	0.374	-0.204*
		60.3	0.032*	-0.224*	-0.04*	-0.056*	0.056	0.056	0.38	0.374	-0.204*
		60.4	0.232*	-0.124*	-0.04*	0.044*	0.056	0.156	0.28	0.274	-0.204*
		60.5	0.232*	-0.124*	-0.04*	0.044*	0.056	0.156	0.28	0.374	-0.204*
		60.6	0.132*	-0.024*	0.06*	0.044*	-0.044	0.156	0.38	0.374	-0.204*
		60.7	0.132*	-0.024*	0.06*	0.044*	0.056	0.156	0.38	0.374	-0.204*
		60.8	0.032*	-0.224*	0.16*	0.044*	-0.044	0.056	0.48	0.474	-0.104*
		60.9	0.032*	-0.224*	0.16*	0.044*	-0.044	-0.044	0.48	0.374	-0.104*
		61	0.032*	-0.224*	0.16*	0.044*	-0.044	-0.044	0.48	0.374	-0.204*
		61.1	0.132*	-0.224*	0.06*	0.044*	-0.044	-0.044	0.48	0.374	-0.204*
		61.2	0.132*	-0.224*	0.06*	0.044*	-0.044	0.156	0.48	0.474	-0.204*
		61.3	0.232*	-0.124*	0.06*	0.044*	0.056	0.156	0.38	0.374	-0.204*
		61.4	0.232*	-0.124*	0.06*	0.044*	0.056	0.156	0.38	0.374	-0.204*
		61.5	0.232*	-0.024*	0.06*	0.044*	0.056	0.056	0.38	0.374	-0.304*
		61.6	0.232*	-0.124*	0.16*	0.044*	-0.044	0.056	0.38	0.374	-0.204*
		61.7	0.132*	-0.224*	0.06*	-0.056*	-0.144	-0.044	0.38	0.374	-0.204*
		61.8	0.132*	-0.224*	0.06*	0.044*	-0.144	-0.044	0.38	0.274	-0.204*
		61.9	0.132*	-0.224*	0.06*	0.044*	-0.144	-0.044	0.38	0.274	-0.204*
		62	0.232*	-0.124*	0.06*	0.044*	-0.144	-0.044	0.28	0.274	-0.204*
		62.1	0.232*	-0.124*	0.06*	0.044*	-0.044	0.056	0.38	0.274	-0.204*
		62.2	0.232*	-0.124*	0.06*	0.044*	-0.044	0.056	0.38	0.274	-0.204*
		62.3	0.232*	-0.124*	0.16*	0.144*	-0.144	0.056	0.28	0.274	-0.304*
		62.4	0.232*	-0.224*	0.26*	0.144*	-0.144	0.056	0.28	0.274	-0.204*
		62.5	0.232*	-0.224*	0.16*	0.144*	-0.244	-0.044	0.28	0.274	-0.204*
		62.6	0.232*	-0.224*	0.06*	0.044*	-0.244	-0.044	0.28	0.274	-0.304*
		62.7	0.232*	-0.224*	0.06*	0.044*	-0.144	-0.044	0.28	0.274	-0.204*
		62.8	0.232*	-0.124*	0.06*	0.044*	-0.244	-0.044	0.38	0.374	-0.204*
		62.9	0.232*	-0.124*	0.06*	0.044*	-0.144	0.056	0.38	0.474	-0.204*
		63	0.232*	-0.124*	0.06*	0.144*	-0.144	0.056	0.28	0.374	-0.204*
		63.1	0.332*	-0.124*	0.16*	0.144*	-0.144	0.056	0.28	0.374	-0.304*
		63.2	0.332*	-0.124*	0.06*	0.044*	-0.244	-0.044	0.28	0.274	-0.304*
		63.3	0.232*	-0.224*	0.06*	0.044*	-0.244	-0.044	0.38	0.274	-0.304*
		63.4	0.232*	-0.124*	0.06*	0.044*	-0.244	-0.144	0.38	0.274	-0.304*
		63.5	0.232*	-0.124*	0.06*	0.044*	-0.244	-0.144	0.28	0.274	-0.104*
		63.6	0.232*	-0.024*	0.06*	0.044*	-0.244	-0.144	0.28	0.374	-0.204*
		63.7	0.232*	-0.024*	0.06*	0.044*	-0.144	-0.044	0.28	0.374	-0.204*
		63.8	0.232*	-0.024*	-0.04*	-0.056*	-0.244	-0.144	0.28	0.374	-0.204*
		63.9	0.332*	-0.024*	-0.04*	-0.056*	-0.144	-0.044	0.18	0.274	-0.204*
		64	0.332*	-0.124*	-0.04*	-0.056*	-0.144	-0.144	0.08	0.274	-0.204*
		64.1	0.232*	-0.224*	0.06*	-0.056*	-0.144	-0.144	0.08	0.274	-0.204*
		64.2	0.232*	-0.124*	0.16*	0.144*	-0.144	-0.144	0.18	0.174	-0.304*
		64.3	0.232*	-0.124*	0.16*	0.144*	-0.144	-0.144	0.18	0.174	-0.304*
		64.4	0.232*	-0.124*	0.16*	0.144*	-0.144	-0.144	0.28	0.274	-0.204*
		64.5	0.132*	-0.124*	0.16*	0.044*	-0.144	-0.244	0.18	0.274	-0.204*
		64.6	0.132*	-0.124*	-0.04*	-0.056*	-0.144	-0.244	0.18	0.374	-0.204*
		64.7	0.232*	-0.024*	-0.04*	-0.056*	-0.044	-0.044	0.08	0.274	-0.304*
		64.8	0.232*	-0.024*	-0.04*	-0.056*	-0.144	-0.044	0.08	0.274	-0.204*
		64.9	0.232*	-0.024*	-0.04*	-0.056*	-0.144	-0.044	0.08	0.274	-0.204*
		65	0.332*	-0.024*	-0.04*	-0.056*	-0.144	-0.044	-0.02	0.274	-0.204*
		65.1	0.232*	-0.124*	0.16*	0.044*	-0.244	-0.144	-0.02	0.274	-0.204*
		65.2	0.232*	-0.124*	0.16*	0.044*	-0.244	-0.144	-0.02	0.274	-0.204*
		65.3	0.232*	-0.124*	-0.04*	-0.056*	-0.244	-0.244	-0.02	0.174	-0.104*
		65.4	0.132*	-0.124*	-0.04*	-0.056*	-0.244	-0.144	0.08	0.274	-0.204*
		65.5	0.132*	-0.124*	-0.04*	-0.056*	-0.144	-0.044	0.08	0.274	-0.104*
		65.6	0.132*	-0.124*	-0.04*	-0.056*	-0.044	-0.044	-0.02	0.274	-0.204*
		65.7	0.232*	-0.024*	-0.04*	-0.056*	-0.044	-0.044	-0.02	0.274	-0.204*
		65.8	0.232*	-0.024*	0.06*	0.044*	-0.044	-0.044	-0.12	0.174	-0.204*
		65.9	0.232*	-0.024*	0.06*	-0.056*	-0.044	-0.044	-0.02	0.274	-0.204*
		66	0.232*	0.076*	0.06*	-0.056*	-0.044	-0.044	-0.02	0.274	-0.204*
		66.1	0.232*	0.076*	-0.04*	-0.056*	-0.044	-0.044	-0.02	0.174	-0.204*
		66.2	0.332*	0.076*	-0.04*	-0.056*	-0.144	-0.044	-0.12	0.174	-0.204*
		66.3	0.132*	-0.024*	-0.04*	-0.056*	-0.244	-0.144	-0.12	0.174	-0.204*
		66.4	0.132*	-0.024*	-0.14*	-0.156*	-0.044	-0.044	-0.02	0.174	-0.204*
		66.5	0.132*	-0.024*	-0.04*	-0.056*	-0.044	-0.044	-0.02	0.274	-0.204*
		66.6	0.132*	-0.124*	-0.04*	-0.056*	-0.044	-0.144	-0.12	0.174	-0.204*
		66.7	0.132*	-0.124*	-0.04*	0.044*	-0.044	-0.144	-0.12	0.174	-0.204*
		66.8	0.132*	-0.124*	0.06*	0.044*	-0.044	-0.044	-0.02	0.274	-0.204*
		66.9	0.132*	-0.024*	0.06*	0.044*	-0.144	-0.044	-0.02	0.274	-0.204*
		67	0.132*	-0.024*	-0.04*	-0.056*	-0.144	-0.044	0.08	0.274	-0.204*
		67.1	0.332*	0.076*	-0.04*	-0.056*	-0.044	0.056	0.08	0.174	-0.204*
		67.2	0.232*	0.076*	-0.04*	-0.056*	-0.144	-0.044	-0.02	0.174	-0.204*
		67.3	0.232*	0.076*	-0.04*	-0.056*	-0.044	-0.044	-0.02	0.174	-0.204*
		67.4	0.132*	-0.024*	-0.04*	-0.056*	-0.044	-0.044	-0.02	0.174	-0.104*
		67.5	0.132*	-0.024*	-0.14*	-0.056*	-0.044	-0.044	-0.12	0.074	-0.104*
		67.6	0.132*	-0.124*	-0.04*	-0.056*	-0.044	-0.044	-0.12	0.074	-0.104*
		67.7	0.132*	-0.124*	-0.14*	-0.156*	-0.144	-0.044	-0.02	0.274	-0.104*
		67.8	0.132*	-0.024*	-0.14*	-0.156*	-0.144	0.056	-0.02	0.274	-0.204*
		67.9	0.232*	-0.024*	-0.14*	-0.156*	-0.144	0.056	-0.02	0.274	-0.204*
		68	0.132*	-0.024*	-0.04*	-0.056*	-0.044	0.056	-0.02	0.274	-0.204*
		68.1	0.132*	-0.024*	-0.04*	-0.056*	-0.044	0.056	0.08	0.274	-0.204*
		68.2	0.132*	-0.024*	-0.04*	-0.056*	-0.044	-0.044	0.08	0.274	-0.304*
		68.3	0.132*	-0.024*	-0.14*	-0.056*	-0.044	-0.044	0.08	0.274	-0.204*
		68.4	0.132*	-0.024*	-0.04*	-0.056*	-0.044	-0.044	-0.02	0.174	-0.204*
		68.5	0.232*	0.176*	-0.04*	-0.056*	-0.144	-0.044	-0.02	0.074	-0.104*
		68.6	0.232*	0.176*	-0.14*	-0.056*	-0.144	-0.044	-0.02	0.174	-0.104*
		68.7	0.132*	0.076*	-0.14*	-0.056*	-0.144	-0.044	-0.02	0.174	-0.104*
		68.8	0.132*	-0.024*	-0.14*	-0.156*	-0.144	0.056	-0.02	0.174	-0.104*
		68.9	0.132*	-0.024*	-0.14*	-0.156*	-0.144	0.056	0.18	0.274	-0.104*
		69	0.132*	-0.024*	-0.14*	-0.156*	-0.144	0.056	0.08	0.274	-0.104*
		69.1	0.132*	-0.024*	-0.14*	-0.056*	-0.044	0.156	-0.02	0.174	-0.204*
		69.2	0.132*	-0.024*	-0.14*	-0.056*	-0.044	0.056	-0.02	0.174	-0.304*
		69.3	0.132*	-0.024*	-0.04*	0.044*	-0.144	-0.044	-0.02	0.174	-0.304*
		69.4	0.232*	-0.024*	-0.04*	0.044*	-0.044	-0.044	-0.02	0.174	-0.304*
		69.5	0.032*	-0.124*	-0.04*	-0.056*	-0.044	-0.044	-0.02	0.174	-0.204*
		69.6	0.032*	-0.124*	-0.04*	-0.156*	-0.044	-0.044	-0.02	0.274	-0.204*
		69.7	0.032*	-0.124*	-0.04*	-0.156*	-0.144	-0.044	0.08	0.374	-0.204*
		69.8	0.032*	-0.124*	-0.14*	-0.056*	-0.144	-0.044	-0.02	0.174	-0.204*
		69.9	0.032*	-0.124*	-0.14*	-0.056*	-0.144	-0.044	-0.02	0.174	-0.204*
		70	0.032*	-0.124*	-0.14*	-0.056*	-0.144	-0.044	-0.02	0.174	-0.104*
		70.1	-0.068*	-0.124*	-0.14*	-0.056*	-0.044	0.156	-0.02	0.174	-0.104*
		70.2	0.032*	-0.024*	-0.04*	-0.056*	-0.144	0.056	0.08	0.174	-0.104*
		70.3	0.132*	-0.024*	-0.04*	-0.156*	-0.144	0.056	-0.02	0.174	-0.104*
		70.4	0.132*	0.076*	-0.04*	-0.156*	-0.144	0.056	-0.02	0.174	-0.204*
		70.5	0.032*	-0.024*	-0.04*	-0.156*	-0.144	-0.044	-0.02	0.274	-0.204*
		70.6	0.032*	-0.024*	-0.14*	-0.056*	-0.044	-0.044	-0.02	0.274	-0.204*
		70.7	0.032*	-0.124*	-0.14*	-0.056*	-0.144	-0.044	-0.02	0.274	-0.204*
		70.8	0.032*	-0.124*	-0.14*	-0.056*	-0.144	0.056	-0.02	0.274	-0.204*
		70.9	0.032*	-0.124*	-0.14*	-0.056*	-0.144	0.056	-0.02	0.274	-0.204*
		71	0.032*	-0.124*	-0.14*	-0.056*	-0.144	0.056	-0.02	0.274	-0.204*
		71.1	0.032*	-0.124*	-0.14*	-0.056*	-0.144	0.056	-0.02	0.174	-0.204*
		71.2	0.032*	-0.124*	-0.14*	0.044*	-0.144	0.056	-0.12	0.174	-0.304*
		71.3	-0.068*	-0.224*	-0.14*	-0.156*	-0.244	-0.044	-0.12	0.174	-0.204*
		71.4	-0.068*	-0.224*	-0.14*	-0.156*	-0.144	0.056	-0.12	0.074	-0.304*
		71.5	-0.068*	-0.124*	-0.14*	-0.156*	-0.044	0.056	-0.02	0.174	-0.204*
		71.6	-0.068*	-0.224*	-0.04*	-0.056*	-0.044	0.056	-0.02	0.174	-0.204*
		71.7	-0.068*	-0.224*	-0.04*	-0.056*	-0.044	0.056	-0.02	0.274	-0.204*
		71.8	-0.068*	-0.224*	-0.04*	-0.056*	-0.144	0.056	-0.02	0.274	-0.204*
		71.9	-0.068*	-0.224*	-0.04*	-0.056*	-0.144	0.056	-0.02	0.274	-0.204*
		72	-0.068*	-0.224*	-0.04*	-0.056*	-0.144	0.056	-0.02	0.174	-0.204*
		72.1	-0.068*	-0.224*	-0.24*	-0.056*	-0.144	0.056	-0.12	0.074	-0.104*
		72.2	-0.068*	-0.224*	-0.24*	-0.056*	-0.144	0.056	-0.02	0.174	-0.204*
		72.3	-0.068*	-0.224*	-0.24*	-0.156*	-0.144	0.056	-0.02	0.174	-0.204*
		72.4	-0.068*	-0.224*	-0.14*	-0.056*	-0.144	0.056	-0.02	0.174	-0.204*
		72.5	-0.068*	-0.224*	-0.04*	-0.056*	-0.244	-0.044	-0.12	0.174	-0.204*
		72.6	-0.068*	-0.324*	-0.04*	-0.056*	-0.144	0.056	-0.12	0.174	-0.204*
		72.7	-0.068*	-0.224*	-0.04*	-0.056*	-0.044	0.156	-0.12	0.174	-0.304*
		72.8	-0.068*	-0.224*	-0.04*	0.044*	-0.144	0.156	-0.12	0.074	-0.204*
		72.9	-0.068*	-0.224*	-0.14*	0.044*	-0.144	0.156	-0.12	0.074	-0.204*
		73	-0.068*	-0.224*	-0.24*	-0.056*	-0.144	0.156	-0.12	0.074	-0.204*
		73.1	-0.068*	-0.224*	-0.24*	-0.056*	-0.144	0.056	-0.12	0.074	-0.104*
		73.2	-0.068*	-0.224*	-0.24*	-0.056*	-0.144	0.056	-0.02	0.174	-0.104*
		73.3	0.032*	-0.124*	-0.14*	0.044*	-0.044	0.056	-0.02	0.174	-0.204*
		73.4	-0.168*	-0.224*	-0.14*	0.044*	-0.144	0.056	-0.02	0.174	-0.204*
		73.5	-0.168*	-0.124*	-0.04*	0.044*	-0.244	-0.044	-0.02	0.174	-0.204*
		73.6	-0.168*	-0.124*	-0.04*	0.044*	-0.244	-0.044	-0.02	0.074	-0.204*
		73.7	-0.168*	-0.124*	-0.04*	0.144*	-0.144	0.056	-0.02	0.074	-0.204*
		73.8	-0.168*	-0.124*	-0.04*	0.144*	-0.144	0.156	-0.12	0.074	-0.204*
		73.9	-0.068*	-0.124*	-0.14*	-0.056*	-0.144	0.156	-0.12	0.174	-0.304*
		74	0.032*	-0.024*	-0.04*	0.044*	-0.044	0.156	-0.22	0.074	-0.304*
		74.1	0.032*	-0.124*	-0.04*	0.044*	-0.044	0.156	-0.22	0.074	-0.204*
		74.2	-0.068*	-0.224*	-0.14*	0.044*	-0.044	0.156	-0.12	0.074	-0.304*
		74.3	-0.068*	-0.224*	-0.14*	0.044*	-0.044	0.156	-0.12	0.074	-0.204*
		74.4	-0.068*	-0.224*	-0.14*	0.044*	-0.144	0.156	-0.02	0.074	-0.204*
		74.5	-0.068*	-0.224*	-0.14*	0.044*	-0.244	-0.044	-0.02	0.074	-0.204*
		74.6	-0.068*	-0.224*	-0.04*	0.144*	-0.244	-0.044	-0.02	0.074	-0.204*
		74.7	0.032*	-0.024*	0.06*	0.244*	-0.144	0.056	-0.02	0.074	-0.204*
		74.8	-0.068*	-0.024*	-0.04*	0.144*	-0.144	0.056	-0.02	0.074	-0.204*
		74.9	-0.068*	-0.024*	-0.04*	0.144*	-0.044	0.156	-0.02	0.074	-0.204*
		75	-0.068*	-0.024*	-0.04*	0.144*	-0.044	0.156	0.08	0.074	-0.304*
		75.1	-0.068*	-0.024*	-0.04*	0.144*	-0.044	0.156	0.08	0.074	-0.204*
		75.2	0.032*	0.076*	-0.04*	0.144*	-0.044	0.156	-0.02	0.074	-0.204*
		75.3	0.032*	0.076*	0.06*	0.244*	-0.044	0.156	0.08	0.174	-0.204*
		75.4	0.032*	-0.024*	0.06*	0.244*	-0.144	0.156	0.08	0.174	-0.204*
		75.5	-0.068*	-0.124*	0.16*	0.244*	-0.044	0.156	0.08	0.174	-0.204*
		75.6	0.032*	-0.124*	0.06*	0.144*	-0.044	0.156	0.08	0.174	-0.304*
		75.7	0.032*	-0.024*	0.06*	0.144*	-0.144	-0.044	0.08	0.074	-0.204*
		75.8	-0.068*	-0.024*	0.06*	0.144*	-0.144	-0.044	-0.02	0.074	-0.204*
		75.9	-0.068*	-0.024*	0.06*	0.244*	-0.044	0.056	0.08	0.074	-0.304*
		76	0.032*	0.076*	-0.04*	0.144*	-0.044	0.156	0.08	0.074	-0.304*
		76.1	0.032*	0.076*	0.06*	0.244*	-0.044	0.156	0.08	0.074	-0.304*
		76.2	0.032*	0.076*	0.06*	0.244*	-0.044	0.156	0.18	0.174	-0.304*
		76.3	0.032*	0.076*	0.06*	0.244*	-0.044	0.156	0.18	0.274	-0.304*
		76.4	-0.068*	-0.024*	0.06*	0.244*	-0.044	0.156	0.18	0.274	-0.304*
		76.5	-0.068*	-0.024*	0.06*	0.244*	-0.044	0.156	0.18	0.274	-0.204*
		76.6	-0.068*	-0.024*	0.16*	0.144*	-0.044	0.156	0.28	0.174	-0.104*
		76.7	-0.068*	-0.024*	0.16*	0.144*	-0.044	0.156	0.28	0.174	-0.104*
		76.8	-0.068*	-0.024*	0.16*	0.144*	-0.044	0.156	0.18	0.174	-0.204*
		76.9	-0.068*	-0.024*	0.06*	0.144*	-0.144	0.056	0.18	0.174	-0.304*
		77	-0.168*	-0.124*	0.06*	0.144*	-0.044	0.056	0.18	0.174	-0.304*
		77.1	0.032*	-0.024*	0.06*	0.244*	-0.044	-0.044	0.28	0.174	-0.304*
		77.2	-0.068*	0.076*	0.06*	0.244*	-0.144	0.056	0.28	0.174	-0.304*
		77.3	-0.068*	0.076*	0.06*	0.244*	-0.144	0.056	0.28	0.174	-0.304*
		77.4	-0.068*	0.076*	0.06*	0.244*	-0.044	0.156	0.28	0.174	-0.304*
		77.5	-0.068*	0.076*	0.06*	0.244*	-0.044	0.156	0.28	0.174	-0.304*
		77.6	-0.068*	0.076*	0.16*	0.244*	-0.044	0.156	0.28	0.274	-0.204*
		77.7	-0.068*	-0.024*	0.16*	0.244*	-0.144	0.056	0.28	0.174	-0.104*
		77.8	-0.068*	0.076*	0.16*	0.244*	-0.144	0.056	0.18	0.174	-0.104*
		77.9	-0.068*	0.076*	0.16*	0.244*	-0.044	0.056	0.18	0.174	-0.304*
		78	-0.068*	0.076*	0.16*	0.244*	-0.044	0.056	0.18	0.174	-0.304*
		78.1	-0.068*	-0.024*	0.16*	0.344*	-0.044	0.056	0.28	0.274	-0.304*
		78.2	-0.068*	-0.024*	0.16*	0.244*	-0.044	0.056	0.28	0.274	-0.304*
		78.3	-0.168*	-0.024*	0.06*	0.144*	-0.144	0.056	0.28	0.174	-0.304*
		78.4	-0.068*	-0.024*	0.06*	0.144*	-0.144	0.056	0.28	0.174	-0.304*
		78.5	-0.068*	0.076*	0.06*	0.144*	-0.144	0.056	0.28	0.174	-0.304*
		78.6	-0.068*	0.076*	0.06*	0.144*	-0.044	0.156	0.28	0.174	-0.204*
		78.7	0.032*	0.076*	0.06*	0.144*	-0.144	0.056	0.18	0.174	-0.204*
		78.8	0.032*	0.076*	0.06*	0.144*	-0.144	0.056	0.18	0.074	-0.204*
		78.9	-0.068*	-0.024*	0.16*	0.144*	-0.044	0.056	0.18	0.174	-0.204*
		79	-0.068*	-0.024*	0.16*	0.144*	-0.044	0.056	0.18	0.174	-0.204*
		79.1	-0.068*	-0.024*	0.16*	0.144*	-0.044	-0.044	0.08	0.074	-0.204*
		79.2	-0.068*	-0.024*	0.16*	0.144*	-0.044	-0.044	0.18	0.074	-0.204*
		79.3	-0.068*	0.076*	0.06*	0.144*	-0.044	-0.044	0.18	0.074	-0.204*
		79.4	-0.068*	0.076*	0.06*	0.244*	-0.044	-0.044	0.08	0.074	-0.204*
		79.5	-0.068*	-0.024*	0.06*	0.244*	-0.144	0.056	0.08	0.074	-0.304*
		79.6	-0.068*	-0.024*	-0.04*	0.144*	-0.144	0.056	0.08	0.074	-0.304*
		79.7	-0.068*	-0.024*	0.06*	0.144*	-0.144	0.056	0.08	-0.026	-0.304*
		79.8	-0.068*	-0.024*	0.06*	0.044*	-0.044	0.156	0.08	-0.026	-0.304*
		79.9	-0.068*	-0.024*	0.06*	0.044*	-0.044	0.056	0.08	-0.026	-0.104*
		80	0.032*	-0.024*	0.06*	0.044*	-0.044	0.056	0.08	0.074	-0.204*
		80.1	0.032*	-0.024*	0.06*	0.044*	-0.044	-0.044	0.08	0.074	-0.204*
		80.2	0.132*	0.076*	0.06*	0.044*	-0.044	-0.044	0.18	0.074	-0.204*
		80.3	0.032*	0.076*	0.06*	0.044*	-0.044	-0.044	0.18	0.074	-0.204*
		80.4	-0.068*	-0.024*	-0.04*	0.044*	-0.044	0.056	0.18	0.074	-0.204*
		80.5	-0.068*	0.076*	-0.04*	0.144*	-0.144	0.056	0.08	-0.026	-0.304*
		80.6	-0.068*	-0.024*	0.06*	0.144*	-0.044	0.156	-0.02	-0.026	-0.304*
		80.7	-0.068*	-0.024*	0.06*	0.044*	-0.044	0.156	-0.02	-0.026	-0.304*
		80.8	0.032*	-0.024*	0.06*	0.044*	-0.144	0.056	-0.02	-0.026	-0.204*
		80.9	0.032*	-0.024*	0.06*	0.044*	-0.144	-0.044	-0.02	-0.026	-0.204*
		81	0.032*	-0.024*	0.06*	0.044*	-0.044	-0.044	0.08	0.074	-0.104*
		81.1	0.032*	-0.024*	0.06*	0.044*	-0.044	-0.044	-0.02	0.074	-0.104*
		81.2	0.132*	0.076*	0.06*	0.044*	-0.044	0.056	-0.02	0.074	-0.204*
		81.3	0.132*	0.076*	0.06*	0.144*	0.056	0.156	0.08	0.074	-0.204*
		81.4	0.032*	0.076*	-0.04*	0.144*	-0.044	0.156	0.08	-0.026	-0.304*
		81.5	-0.068*	-0.024*	-0.14*	-0.056*	-0.044	0.156	0.08	-0.026	-0.304*
		81.6	-0.068*	-0.024*	-0.04*	-0.056*	-0.044	0.156	0.08	-0.026	-0.304*
		81.7	-0.068*	0.076*	-0.04*	-0.056*	-0.044	0.156	0.08	-0.026	-0.304*
		81.8	0.032*	-0.024*	0.06*	0.044*	-0.044	0.156	-0.12	-0.126	-0.304*
		81.9	0.032*	-0.024*	0.06*	0.044*	-0.044	0.156	-0.12	-0.126	-0.304*
		82	0.032*	-0.024*	0.06*	0.044*	-0.144	0.056	-0.02	-0.026	-0.304*
		82.1	0.132*	0.076*	0.06*	0.044*	-0.144	0.056	-0.02	-0.026	-0.104*
		82.2	0.132*	0.076*	0.06*	0.044*	0.056	0.156	-0.02	0.074	-0.104*
		82.3	0.132*	0.076*	0.06*	-0.056*	0.056	0.056	0.08	0.074	-0.104*
		82.4	0.132*	0.076*	0.06*	-0.056*	0.056	0.056	0.08	0.074	-0.204*
		82.5	0.032*	0.076*	-0.04*	-0.156*	0.056	0.056	0.08	0.074	-0.204*
		82.6	0.032*	0.076*	-0.04*	-0.056*	0.056	0.056	0.08	0.074	-0.204*
		82.7	0.032*	0.076*	0.06*	0.044*	0.056	0.056	0.08	0.074	-0.304*
		82.8	0.032*	0.076*	0.06*	0.044*	0.056	0.156	0.08	0.074	-0.304*
		82.9	0.132*	0.176*	0.06*	0.044*	0.056	0.156	0.18	0.174	-0.204*
		83	0.132*	0.176*	0.06*	0.044*	0.056	0.156	0.18	0.174	-0.204*
		83.1	0.132*	0.176*	0.06*	0.044*	0.156	0.256	0.18	0.074	-0.204*
		83.2	0.132*	0.176*	0.06*	0.044*	0.156	0.256	0.18	0.074	-0.204*
		83.3	0.132*	0.176*	0.16*	0.044*	0.056	0.156	0.08	-0.026	-0.204*
		83.4	0.132*	0.076*	0.06*	0.044*	0.056	0.156	0.08	-0.026	-0.204*
		83.5	0.132*	0.076*	0.06*	0.044*	-0.044	0.156	0.08	-0.026	-0.104*
		83.6	0.132*	0.076*	0.06*	-0.056*	0.056	0.156	0.08	-0.026	-0.104*
		83.7	0.032*	0.076*	0.06*	-0.056*	0.056	0.156	0.08	-0.026	-0.104*
		83.8	0.032*	0.076*	0.06*	-0.056*	0.056	0.056	0.08	-0.026	-0.304*
		83.9	0.032*	0.076*	0.06*	-0.056*	0.056	0.056	0.18	0.074	-0.304*
		84	0.132*	0.076*	0.06*	-0.056*	0.056	0.056	0.18	0.174	-0.304*
		84.1	0.132*	0.076*	0.06*	-0.056*	0.056	0.056	0.18	0.174	-0.304*
		84.2	0.132*	0.076*	0.06*	-0.056*	0.056	0.156	0.18	0.174	-0.204*
		84.3	0.132*	0.076*	0.16*	0.044*	0.056	0.156	0.18	0.174	-0.104*
		84.4	0.132*	0.076*	0.16*	0.044*	-0.044	0.056	0.18	0.174	-0.104*
		84.5	0.132*	0.076*	0.16*	0.044*	0.056	0.156	0.18	0.174	-0.204*
		84.6	0.232*	0.176*	0.16*	0.144*	0.056	0.156	0.18	0.074	-0.204*
		84.7	0.232*	0.176*	0.06*	0.044*	0.056	0.156	0.18	0.074	-0.204*
		84.8	0.232*	0.076*	0.06*	0.044*	0.056	0.156	0.08	-0.026	-0.204*
		84.9	0.232*	0.076*	0.06*	0.044*	0.056	0.156	0.08	-0.026	-0.204*
		85	0.232*	0.076*	0.06*	-0.056*	-0.044	0.156	0.08	-0.026	-0.204*
		85.1	0.232*	0.076*	0.06*	-0.056*	-0.044	0.056	0.18	-0.026	-0.104*
		85.2	0.232*	0.076*	0.16*	-0.056*	0.056	0.156	0.18	-0.026	-0.304*
		85.3	0.132*	-0.024*	0.16*	-0.056*	0.056	0.156	0.18	-0.026	-0.204*
		85.4	0.132*	-0.024*	0.16*	-0.056*	0.056	0.156	0.28	0.074	-0.204*
		85.5	0.132*	0.076*	0.06*	-0.056*	-0.044	0.056	0.28	0.074	-0.204*
		85.6	0.232*	0.176*	0.06*	-0.056*	-0.044	0.056	0.28	0.074	-0.204*
		85.7	0.232*	0.176*	0.16*	0.144*	-0.044	0.056	0.28	0.174	-0.204*
		85.8	0.332*	0.176*	0.16*	0.144*	-0.044	0.056	0.28	0.174	-0.304*
		85.9	0.332*	0.176*	0.06*	0.044*	-0.044	0.156	0.28	0.174	-0.204*
		86	0.232*	0.076*	0.06*	-0.056*	-0.044	0.156	0.18	0.174	-0.204*
		86.1	0.232*	0.076*	0.06*	-0.056*	-0.044	0.156	0.18	0.174	-0.104*
		86.2	0.232*	-0.024*	0.06*	-0.056*	-0.044	0.156	0.18	0.174	-0.204*
		86.3	0.232*	-0.024*	0.06*	-0.056*	0.056	0.256	0.18	0.174	-0.204*
		86.4	0.232*	-0.024*	0.06*	-0.056*	-0.044	0.156	0.18	0.174	-0.204*
		86.5	0.332*	0.076*	0.16*	-0.056*	-0.044	0.056	0.28	0.174	-0.104*
		86.6	0.432*	0.076*	0.16*	-0.056*	-0.044	0.056	0.38	0.374	-0.204*
		86.7	0.432*	0.076*	0.06*	-0.156*	-0.044	0.056	0.28	0.274	-0.204*
		86.8	0.332*	-0.024*	-0.04*	-0.156*	-0.044	0.156	0.28	0.274	-0.204*
		86.9	0.332*	-0.024*	-0.04*	-0.156*	-0.044	0.156	0.28	0.174	-0.204*
		87	0.332*	0.076*	-0.04*	-0.056*	-0.044	0.156	0.28	0.174	-0.204*
		87.1	0.232*	0.076*	0.06*	0.044*	-0.044	0.156	0.28	0.174	-0.204*
		87.2	0.232*	0.076*	0.06*	0.044*	-0.044	0.156	0.28	0.174	-0.204*
		87.3	0.232*	-0.024*	0.06*	-0.056*	-0.044	0.156	0.18	0.174	-0.204*
		87.4	0.232*	-0.024*	0.06*	-0.056*	-0.044	0.156	0.28	0.174	-0.204*
		87.5	0.232*	-0.124*	-0.04*	-0.156*	-0.044	0.056	0.18	0.074	-0.104*
		87.6	0.332*	-0.024*	-0.04*	-0.156*	-0.144	-0.044	0.18	0.174	-0.104*
		87.7	0.332*	-0.024*	-0.04*	-0.156*	-0.144	-0.044	0.18	0.174	-0.004*
		87.8	0.332*	-0.024*	-0.04*	-0.156*	-0.144	-0.044	0.18	0.174	-0.004*
		87.9	0.332*	-0.024*	0.06*	-0.156*	-0.144	-0.044	0.18	0.174	-0.104*
		88	0.332*	-0.024*	-0.04*	-0.156*	-0.244	0.056	0.18	0.174	-0.104*
		88.1	0.332*	-0.024*	-0.04*	-0.156*	-0.044	0.156	0.28	0.174	-0.104*
		88.2	0.332*	0.076*	-0.04*	-0.156*	-0.044	0.156	0.28	0.174	-0.104*
		88.3	0.332*	0.076*	-0.14*	-0.256*	-0.044	0.156	0.38	0.374	-0.204*
		88.4	0.332*	0.076*	-0.04*	-0.156*	-0.044	0.156	0.28	0.274	-0.204*
		88.5	0.332*	0.076*	-0.04*	-0.056*	-0.044	0.156	0.28	0.174	-0.104*
		88.6	0.332*	0.076*	-0.04*	-0.156*	-0.044	0.156	0.18	0.174	-0.004*
		88.7	0.332*	0.076*	-0.04*	-0.156*	-0.044	0.056	0.18	0.174	-0.004*
		88.8	0.232*	0.076*	-0.14*	-0.156*	-0.044	0.056	0.18	0.174	-0.004*
		88.9	0.132*	-0.124*	-0.14*	-0.156*	-0.144	-0.044	0.18	0.174	-0.004*
		89	0.132*	-0.124*	-0.14*	-0.156*	-0.144	-0.044	0.18	0.174	-0.004*
		89.1	0.132*	-0.124*	-0.14*	-0.156*	-0.144	-0.044	0.28	0.274	-0.004*
		89.2	0.232*	-0.024*	-0.04*	-0.156*	-0.144	0.056	0.28	0.274	-0.004*
		89.3	0.232*	-0.024*	-0.04*	-0.156*	-0.044	0.056	0.18	0.174	0.096*
		89.4	0.232*	-0.024*	0.06*	-0.056*	-0.144	0.056	0.18	0.174	-0.004*
		89.5	0.232*	-0.024*	0.06*	-0.056*	-0.144	0.056	0.28	0.274	-0.004*
		89.6	0.232*	-0.024*	-0.04*	-0.156*	-0.144	0.056	0.18	0.274	-0.004*
		89.7	0.232*	-0.024*	-0.04*	-0.256*	-0.144	0.056	0.18	0.274	-0.104*
		89.8	0.232*	-0.024*	-0.04*	-0.256*	-0.144	0.056	0.18	0.274	-0.104*
		89.9	0.232*	-0.024*	-0.04*	-0.256*	-0.144	0.056	0.18	0.274	-0.104*
		90	0.232*	-0.024*	-0.04*	-0.156*	-0.244	-0.044	0.28	0.274	-0.104*
		90.1	0.232*	-0.024*	-0.04*	-0.156*	-0.144	-0.044	0.18	0.274	-0.104*
		90.2	0.232*	-0.024*	-0.14*	-0.156*	-0.044	-0.044	0.18	0.174	-0.104*
		90.3	0.332*	0.076*	-0.14*	-0.156*	-0.044	-0.044	0.18	0.174	-0.104*
		90.4	0.332*	0.076*	-0.14*	-0.156*	-0.044	0.056	0.18	0.174	-0.004*
		90.5	0.332*	0.076*	-0.04*	-0.156*	-0.044	0.056	0.18	0.174	-0.004*
		90.6	0.332*	0.076*	-0.04*	-0.156*	-0.044	0.056	0.18	0.174	-0.004*
		90.7	0.432*	0.076*	-0.04*	-0.156*	-0.044	0.056	0.08	0.174	-0.004*
		90.8	0.332*	0.076*	-0.04*	-0.156*	-0.044	0.056	0.08	0.174	-0.004*
		90.9	0.332*	0.076*	0.06*	-0.056*	-0.044	0.056	0.18	0.174	-0.004*
		91	0.332*	0.076*	-0.04*	-0.156*	-0.144	-0.044	0.18	0.274	-0.004*
		91.1	0.232*	0.076*	-0.04*	-0.156*	-0.244	-0.044	0.18	0.274	-0.104*
		91.2	0.232*	0.076*	-0.04*	-0.156*	-0.044	0.056	0.18	0.274	-0.104*
		91.3	0.232*	0.076*	-0.14*	-0.156*	-0.044	0.056	0.18	0.174	-0.004*
		91.4	0.232*	0.076*	-0.14*	-0.156*	-0.044	0.156	0.18	0.174	0.096*
		91.5	0.232*	0.076*	-0.14*	-0.156*	-0.044	0.056	0.18	0.174	-0.004*
		91.6	0.232*	0.076*	-0.14*	-0.156*	-0.044	0.056	0.18	0.174	0.096*
		91.7	0.232*	0.176*	-0.04*	-0.156*	-0.144	-0.044	0.08	0.174	0.096*
		91.8	0.232*	0.176*	-0.04*	-0.156*	-0.144	-0.044	0.08	0.174	0.096*
		91.9	0.232*	0.176*	-0.04*	-0.156*	-0.144	-0.044	0.08	0.174	0.096*
		92	0.232*	0.176*	-0.04*	-0.156*	-0.044	-0.044	0.08	0.174	0.096*
		92.1	0.232*	0.076*	-0.04*	-0.156*	-0.044	-0.044	0.08	0.274	0.096*
		92.2	0.332*	0.076*	0.06*	-0.056*	-0.044	-0.044	0.08	0.274	0.096*
		92.3	0.232*	0.076*	0.06*	-0.056*	-0.044	-0.044	0.18	0.274	-0.004*
		92.4	0.232*	0.076*	0.06*	-0.056*	-0.144	-0.044	0.18	0.274	-0.004*
		92.5	0.232*	0.076*	0.06*	-0.056*	-0.044	0.056	0.18	0.174	-0.004*
		92.6	0.332*	0.276*	0.06*	-0.056*	-0.144	-0.044	0.18	0.174	-0.004*
		92.7	0.332*	0.276*	0.06*	0.044*	-0.144	-0.044	0.18	0.174	-0.004*
		92.8	0.332*	0.276*	0.06*	0.044*	-0.144	-0.044	0.18	0.174	-0.004*
		92.9	0.232*	0.176*	0.06*	0.044*	-0.144	0.056	0.08	0.174	-0.004*
		93	0.232*	0.176*	0.06*	0.044*	-0.144	0.056	0.08	0.174	-0.004*
		93.1	0.232*	0.176*	-0.04*	-0.056*	-0.144	0.056	0.08	0.174	-0.004*
		93.2	0.232*	0.176*	-0.04*	-0.156*	-0.144	0.056	0.08	0.174	-0.004*
		93.3	0.232*	0.176*	-0.04*	-0.156*	-0.144	-0.044	0.08	0.274	-0.004*
		93.4	0.232*	0.176*	-0.04*	-0.156*	-0.244	-0.144	0.18	0.274	-0.004*
		93.5	0.232*	0.176*	-0.04*	-0.156*	-0.144	-0.044	0.18	0.274	-0.004*
		93.6	0.132*	0.176*	-0.04*	-0.056*	-0.144	-0.044	0.18	0.274	-0.004*
		93.7	0.132*	0.276*	-0.04*	-0.056*	-0.144	-0.044	0.18	0.274	-0.104*
		93.8	0.232*	0.276*	-0.14*	-0.056*	-0.044	-0.044	0.18	0.274	-0.104*
		93.9	0.232*	0.176*	-0.14*	-0.056*	-0.044	-0.044	0.18	0.174	-0.004*
		94	0.232*	0.176*	-0.04*	0.044*	-0.044	-0.044	0.18	0.174	-0.004*
		94.1	0.232*	0.176*	0.06*	0.044*	-0.044	-0.044	0.18	0.174	0.096*
		94.2	0.232*	0.176*	0.06*	0.044*	-0.044	-0.044	0.18	0.174	0.096*
		94.3	0.232*	0.176*	0.06*	-0.056*	-0.144	-0.144	0.28	0.274	0.096*
		94.4	0.232*	0.176*	-0.04*	-0.156*	-0.244	-0.144	0.38	0.274	-0.004*
		94.5	0.232*	0.176*	-0.04*	-0.056*	-0.244	-0.144	0.38	0.274	-0.004*
		94.6	0.232*	0.176*	-0.04*	-0.056*	-0.144	-0.044	0.38	0.274	-0.004*
		94.7	0.232*	0.176*	-0.04*	-0.056*	-0.144	-0.144	0.28	0.174	-0.004*
		94.8	0.232*	0.176*	-0.04*	-0.056*	-0.144	-0.144	0.28	0.174	-0.004*
		94.9	0.232*	0.176*	-0.14*	-0.056*	-0.144	-0.144	0.28	0.174	-0.004*
		95	0.232*	0.176*	-0.04*	-0.056*	-0.144	-0.144	0.18	0.274	-0.004*
		95.1	0.132*	0.176*	-0.04*	-0.056*	-0.144	-0.144	0.18	0.274	0.096*
		95.2	0.032*	0.076*	-0.04*	-0.056*	-0.144	-0.044	0.28	0.374	0.096*
		95.3	0.132*	0.076*	-0.04*	-0.056*	-0.144	-0.044	0.28	0.274	0.096*
		95.4	0.132*	0.076*	-0.04*	-0.056*	-0.144	-0.044	0.28	0.274	-0.004*
		95.5	0.132*	-0.024*	-0.14*	-0.056*	-0.144	-0.044	0.28	0.274	0.096*
		95.6	0.132*	-0.024*	-0.04*	0.044*	-0.144	-0.044	0.28	0.274	-0.004*
		95.7	0.132*	-0.024*	-0.04*	0.044*	-0.044	-0.044	0.28	0.274	-0.004*
		95.8	0.232*	0.076*	-0.04*	0.044*	-0.044	-0.044	0.28	0.274	-0.004*
		95.9	0.232*	0.176*	-0.04*	-0.056*	-0.044	-0.044	0.38	0.274	-0.004*
		96	0.232*	0.176*	-0.04*	-0.056*	-0.044	-0.044	0.28	0.174	0.096*
		96.1	0.132*	0.176*	-0.04*	-0.056*	-0.044	-0.044	0.28	0.174	0.096*
		96.2	0.132*	0.176*	0.06*	-0.056*	-0.044	-0.044	0.28	0.174	-0.004*
		96.3	0.132*	0.176*	0.06*	-0.056*	-0.044	-0.044	0.28	0.174	-0.004*
		96.4	0.032*	0.076*	0.06*	-0.056*	-0.044	-0.144	0.28	0.174	-0.004*
		96.5	0.032*	0.076*	0.06*	-0.056*	-0.044	-0.144	0.28	0.174	0.096*
		96.6	0.032*	0.076*	-0.04*	-0.156*	-0.044	-0.144	0.28	0.174	0.096*
		96.7	0.032*	0.076*	0.06*	-0.056*	-0.044	-0.144	0.28	0.274	0.096*
		96.8	0.032*	0.076*	0.06*	-0.056*	-0.144	-0.144	0.28	0.274	0.096*
		96.9	0.132*	0.076*	0.06*	-0.056*	-0.044	-0.044	0.28	0.274	0.096*
		97	0.132*	0.076*	0.06*	0.044*	-0.044	-0.044	0.18	0.174	0.096*
		97.1	0.032*	-0.024*	0.06*	0.044*	-0.044	-0.044	0.28	0.274	-0.004*
		97.2	0.032*	-0.124*	0.16*	0.044*	-0.044	-0.044	0.38	0.174	-0.004*
		97.3	0.032*	-0.124*	0.16*	0.044*	-0.044	-0.044	0.38	0.174	-0.004*
		97.4	0.032*	-0.024*	0.16*	-0.056*	-0.044	-0.044	0.38	0.174	0.096*
		97.5	0.132*	0.076*	0.16*	-0.056*	-0.044	-0.044	0.38	0.174	0.096*
		97.6	0.132*	0.076*	0.06*	-0.156*	-0.044	-0.144	0.28	0.174	0.096*
		97.7	0.232*	0.076*	0.06*	-0.156*	-0.044	-0.044	0.28	0.174	0.096*
		97.8	0.132*	0.076*	0.06*	-0.156*	-0.044	-0.044	0.28	0.174	0.096*
		97.9	0.032*	-0.024*	0.06*	-0.156*	0.056	-0.044	0.18	0.074	0.096*
		98	0.032*	-0.024*	0.06*	-0.156*	0.056	-0.044	0.18	0.074	0.096*
		98.1	0.032*	-0.024*	0.16*	0.044*	0.056	-0.044	0.18	0.074	0.196*
		98.2	0.032*	0.076*	0.26*	0.044*	0.056	-0.044	0.18	0.074	0.096*
		98.3	0.032*	0.076*	0.26*	0.044*	0.056	-0.044	0.18	0.174	0.096*
		98.4	-0.068*	-0.024*	0.26*	0.044*	-0.044	-0.144	0.18	0.174	0.096*
		98.5	0.132*	-0.024*	0.26*	0.044*	-0.144	-0.144	0.18	0.174	-0.004*
		98.6	0.132*	-0.024*	0.26*	0.044*	-0.144	-0.144	0.18	0.174	-0.004*
		98.7	0.132*	-0.024*	0.26*	0.044*	-0.044	-0.144	0.18	0.174	-0.004*
		98.8	0.132*	-0.024*	0.26*	0.044*	-0.044	-0.144	0.28	0.174	0.096*
		98.9	0.132*	-0.024*	0.16*	-0.056*	-0.044	-0.144	0.28	0.174	0.096*
		99	0.032*	-0.124*	0.16*	-0.056*	-0.044	-0.144	0.28	0.174	0.096*
		99.1	0.032*	-0.024*	0.16*	-0.056*	-0.044	-0.144	0.28	0.174	0.096*
		99.2	0.032*	-0.024*	0.16*	-0.056*	-0.044	-0.144	0.18	0.074	0.096*
		99.3	-0.068*	-0.024*	0.16*	-0.056*	-0.044	-0.044	0.28	0.074	0.096*
		99.4	0.032*	0.076*	0.26*	0.044*	-0.044	-0.044	0.28	0.074	0.096*
		99.5	0.032*	0.076*	0.26*	0.044*	-0.044	-0.044	0.28	0.074	0.096*
		99.6	0.032*	0.076*	0.26*	0.144*	0.056	0.056	0.28	0.074	0.096*
		99.7	0.032*	0.076*	0.26*	0.144*	0.056	0.056	0.18	0.074	0.096*
		99.8	0.132*	0.076*	0.26*	0.144*	0.056	0.056	0.28	0.174	-0.004*
		99.9	0.132*	0.176*	0.26*	0.144*	0.156	0.056	0.28	0.174	-0.004*
		100	0.032*	0.076*	0.36*	0.144*	0.056	-0.144	0.28	0.174	-0.004*
		100.1	0.032*	0.076*	0.26*	0.044*	-0.044	-0.144	0.28	0.174	-0.004*
		100.2	0.032*	0.076*	0.26*	0.044*	-0.044	-0.044	0.28	0.174	-0.004*
		100.3	0.032*	-0.024*	0.26*	0.044*	-0.044	-0.044	0.28	0.174	-0.004*
		100.4	0.032*	-0.024*	0.26*	-0.056*	-0.044	-0.044	0.28	0.174	-0.004*
		100.5	0.032*	-0.024*	0.26*	-0.056*	-0.044	-0.044	0.28	0.174	0.096*
		100.6	0.032*	-0.024*	0.26*	-0.056*	-0.044	-0.044	0.28	0.074	0.096*
		100.7	0.032*	-0.024*	0.16*	-0.056*	0.056	-0.044	0.28	0.074	0.096*
		100.8	0.132*	0.076*	0.16*	-0.056*	0.056	-0.044	0.18	0.074	0.096*
		100.9	0.132*	0.076*	0.16*	-0.056*	0.056	-0.044	0.18	0.074	0.096*
		101	0.132*	0.076*	0.16*	0.044*	-0.044	-0.144	0.18	0.074	0.096*
		101.1	0.232*	0.176*	0.16*	0.044*	-0.044	-0.144	0.18	0.074	0.096*
		101.2	0.132*	0.076*	0.16*	0.044*	-0.144	-0.044	0.18	0.074	0.096*
		101.3	0.132*	0.076*	0.16*	0.044*	-0.144	-0.044	0.18	0.074	0.096*
		101.4	0.132*	0.076*	0.16*	0.044*	-0.144	-0.144	0.18	0.074	0.096*
		101.5	0.032*	0.076*	0.26*	0.044*	-0.144	-0.144	0.18	0.074	-0.004*
		101.6	0.032*	0.076*	0.26*	0.044*	-0.044	-0.144	0.18	0.074	-0.104*
		101.7	0.032*	0.076*	0.16*	-0.056*	0.056	-0.044	0.18	0.074	-0.104*
		101.8	0.032*	0.076*	0.16*	-0.056*	0.056	-0.044	0.18	0.074	-0.104*
		101.9	0.032*	0.076*	0.16*	-0.056*	0.056	-0.044	0.18	0.074	-0.104*
		102	0.032*	0.076*	0.06*	-0.056*	0.056	-0.044	0.28	0.174	-0.104*
		102.1	0.032*	0.076*	0.06*	0.044*	0.056	-0.044	0.28	0.174	-0.104*
		102.2	0.032*	-0.024*	0.06*	0.044*	0.056	-0.044	0.28	0.174	-0.104*
		102.3	0.032*	0.076*	0.06*	0.044*	0.056	-0.044	0.28	0.174	-0.104*
		102.4	0.032*	-0.024*	0.16*	0.144*	0.056	-0.044	0.28	0.174	-0.104*
		102.5	0.132*	-0.024*	0.16*	0.144*	0.056	-0.044	0.28	0.274	-0.104*
		102.6	0.132*	-0.024*	0.16*	0.144*	-0.044	-0.044	0.28	0.274	-0.104*
		102.7	0.132*	-0.024*	0.16*	0.144*	-0.044	-0.044	0.28	0.174	-0.204*
		102.8	0.132*	0.076*	0.16*	0.144*	-0.044	-0.044	0.28	0.174	-0.204*
		102.9	0.132*	0.076*	0.06*	0.044*	-0.044	-0.044	0.28	0.174	-0.104*
		103	0.132*	0.076*	0.06*	0.044*	-0.044	-0.044	0.28	0.174	-0.104*
		103.1	0.132*	0.076*	-0.04*	0.044*	-0.044	-0.044	0.18	0.074	-0.104*
		103.2	0.032*	-0.024*	-0.04*	0.044*	-0.044	-0.044	0.18	0.074	-0.104*
		103.3	0.032*	-0.024*	-0.04*	0.044*	-0.044	-0.044	0.18	0.074	-0.004*
		103.4	0.032*	-0.024*	-0.04*	0.044*	0.056	0.056	0.18	0.074	-0.004*
		103.5	0.032*	-0.024*	-0.04*	0.044*	0.056	0.056	0.18	0.074	-0.004*
		103.6	0.032*	-0.024*	-0.04*	0.044*	0.056	0.056	0.18	0.074	-0.004*
		103.7	0.032*	-0.024*	-0.04*	0.144*	0.056	0.056	0.18	0.074	-0.104*
		103.8	0.032*	-0.024*	-0.04*	0.144*	0.156	0.056	0.18	0.074	-0.104*
		103.9	0.032*	-0.024*	0.06*	0.144*	0.156	0.056	0.28	0.174	-0.104*
		104	0.032*	-0.024*	-0.04*	0.044*	0.156	0.056	0.28	0.174	-0.104*
		104.1	0.032*	-0.024*	-0.14*	0.044*	0.056	-0.044	0.28	0.174	-0.104*
		104.2	0.032*	-0.024*	-0.14*	0.044*	0.056	0.056	0.28	0.074	-0.104*
		104.3	0.032*	-0.024*	-0.14*	0.044*	0.056	0.056	0.28	0.174	-0.204*
		104.4	0.032*	-0.024*	-0.14*	0.044*	-0.044	0.056	0.28	0.174	-0.204*
		104.5	0.032*	-0.024*	-0.04*	0.144*	-0.044	0.056	0.18	0.174	-0.204*
		104.6	0.032*	-0.024*	-0.04*	0.144*	-0.044	0.056	0.08	0.074	-0.204*
		104.7	0.032*	-0.024*	-0.04*	0.144*	-0.044	-0.044	0.08	0.074	-0.204*
		104.8	0.032*	-0.024*	-0.04*	0.144*	-0.044	-0.044	0.08	0.074	-0.204*
		104.9	0.032*	-0.024*	-0.04*	0.044*	0.056	0.056	0.08	0.074	-0.304*
		105	0.032*	-0.024*	-0.04*	0.044*	0.056	0.056	0.18	0.074	-0.304*
		105.1	0.032*	-0.024*	-0.04*	0.044*	0.056	0.056	0.18	0.074	-0.304*
		105.2	0.132*	-0.024*	-0.04*	0.044*	0.056	0.056	0.18	0.074	-0.304*
		105.3	0.132*	0.076*	-0.04*	0.044*	0.056	0.056	0.18	0.074	-0.304*
		105.4	0.132*	-0.024*	0.06*	0.044*	0.056	0.056	0.18	0.074	-0.204*
		105.5	0.232*	0.076*	0.06*	0.044*	0.256	0.156	0.18	0.074	-0.204*
		105.6	0.232*	0.076*	-0.04*	0.044*	0.156	0.056	0.18	0.074	-0.204*
		105.7	0.232*	0.076*	-0.14*	-0.056*	0.156	0.156	0.18	0.074	-0.204*
		105.8	0.232*	0.076*	-0.14*	-0.056*	0.156	0.156	0.18	0.074	-0.204*
		105.9	0.232*	0.076*	-0.14*	-0.056*	0.156	0.156	0.08	0.074	-0.304*
		106	0.232*	0.076*	-0.04*	0.044*	0.156	0.156	0.08	0.074	-0.304*
		106.1	0.132*	-0.024*	-0.04*	0.144*	0.156	0.156	0.08	0.074	-0.304*
		106.2	0.132*	-0.024*	-0.04*	0.144*	0.156	0.156	0.08	0.074	-0.304*
		106.3	0.132*	-0.024*	-0.04*	0.144*	0.156	0.156	0.18	0.174	-0.304*
		106.4	0.132*	-0.024*	-0.04*	0.144*	0.156	0.156	0.18	0.174	-0.304*
		106.5	0.132*	-0.024*	-0.04*	0.044*	0.156	0.156	0.18	0.074	-0.304*
		106.6	0.132*	-0.024*	-0.04*	0.044*	0.256	0.256	0.08	0.074	-0.304*
		106.7	0.132*	-0.024*	-0.04*	0.044*	0.256	0.256	0.08	0.074	-0.304*
		106.8	0.132*	-0.024*	-0.04*	0.044*	0.256	0.256	0.08	0.074	-0.404*
		106.9	0.132*	-0.024*	-0.04*	0.044*	0.156	0.256	-0.02	-0.026	-0.404*
		107	0.132*	-0.024*	-0.04*	0.044*	0.156	0.256	-0.02	-0.026	-0.204*
		107.1	0.132*	-0.024*	-0.04*	0.044*	0.156	0.256	-0.02	-0.026	-0.204*
		107.2	0.232*	0.076*	0.06*	0.044*	0.056	0.156	-0.02	-0.026	-0.204*
		107.3	0.232*	0.076*	0.06*	0.044*	0.056	0.156	-0.02	-0.026	-0.204*
		107.4	0.232*	0.076*	0.06*	0.044*	0.056	0.156	-0.02	-0.026	-0.204*
		107.5	0.232*	0.076*	0.06*	0.044*	0.056	0.156	-0.02	-0.026	-0.304*
		107.6	0.232*	-0.024*	0.06*	0.044*	0.056	0.156	-0.02	-0.026	-0.304*
		107.7	0.132*	-0.124*	0.06*	0.044*	0.056	0.156	-0.02	-0.126	-0.304*
		107.8	0.132*	-0.124*	0.06*	0.044*	0.056	0.256	-0.02	-0.126	-0.304*
		107.9	0.132*	-0.124*	0.06*	0.044*	0.056	0.256	0.08	-0.126	-0.304*
		108	0.132*	-0.124*	-0.04*	0.044*	0.156	0.256	0.08	-0.026	-0.304*
		108.1	0.132*	-0.124*	-0.04*	0.044*	0.156	0.256	0.08	-0.026	-0.304*
		108.2	0.132*	-0.124*	-0.04*	0.044*	0.156	0.256	0.08	-0.026	-0.304*
		108.3	0.132*	-0.124*	-0.14*	0.044*	0.156	0.156	0.08	-0.026	-0.304*
		108.4	0.132*	-0.124*	-0.14*	0.044*	0.156	0.156	0.18	0.074	-0.304*
		108.5	0.132*	-0.124*	-0.04*	0.044*	0.156	0.156	0.18	0.074	-0.304*
		108.6	0.132*	-0.124*	-0.04*	0.044*	0.056	0.056	0.08	-0.026	-0.304*
		108.7	0.132*	-0.124*	-0.04*	0.044*	0.056	0.056	0.08	-0.026	-0.304*
		108.8	0.132*	-0.024*	-0.04*	-0.056*	0.056	0.056	0.08	-0.026	-0.304*
		108.9	0.132*	-0.024*	-0.04*	-0.056*	0.056	0.056	0.08	-0.026	-0.204*
		109	0.132*	-0.024*	-0.04*	-0.056*	0.056	0.056	0.08	-0.026	-0.104*
		109.1	0.132*	-0.024*	-0.04*	-0.056*	0.056	0.056	0.08	-0.026	-0.104*
		109.2	0.132*	-0.024*	-0.04*	-0.056*	0.056	0.056	0.18	-0.026	-0.204*
		109.3	0.132*	-0.024*	-0.04*	-0.056*	0.056	0.056	0.08	-0.026	-0.204*
		109.4	0.132*	-0.024*	-0.04*	-0.056*	0.156	0.056	0.08	-0.026	-0.204*
		109.5	0.032*	-0.024*	0.06*	0.044*	0.156	0.056	0.08	-0.026	-0.204*
		109.6	-0.068*	-0.124*	0.06*	0.044*	0.156	0.056	0.08	0.074	-0.204*
		109.7	-0.068*	-0.124*	0.06*	0.044*	0.156	0.056	0.08	0.074	-0.204*
		109.8	-0.068*	-0.124*	0.16*	0.044*	0.056	-0.044	0.08	-0.026	-0.204*
		109.9	-0.068*	-0.124*	0.16*	0.044*	0.056	-0.044	0.08	-0.026	-0.204*
		110	0.032*	-0.124*	0.16*	0.044*	-0.044	-0.044	0.08	-0.026	-0.204*
		110.1	0.032*	-0.124*	0.16*	0.044*	-0.044	0.056	0.08	-0.026	-0.204*
		110.2	0.132*	0.076*	0.16*	0.144*	-0.044	0.056	0.08	-0.026	-0.204*
		110.3	0.132*	-0.024*	0.16*	0.144*	-0.044	0.056	0.08	-0.026	-0.204*
		110.4	0.132*	-0.024*	0.06*	0.044*	-0.044	0.056	0.18	0.074	-0.204*
		110.5	0.132*	-0.024*	0.06*	0.044*	-0.044	0.056	0.08	-0.026	-0.204*
		110.6	0.132*	-0.024*	0.06*	0.044*	-0.144	-0.144	0.08	-0.026	-0.204*
		110.7	0.132*	-0.024*	-0.04*	-0.056*	-0.144	-0.144	0.08	-0.026	-0.404*
		110.8	0.132*	-0.024*	-0.04*	-0.056*	-0.144	-0.144	0.18	-0.026	-0.404*
		110.9	0.032*	-0.024*	-0.04*	-0.056*	-0.144	-0.144	0.18	-0.026	-0.404*
		111	0.032*	-0.024*	-0.04*	-0.056*	-0.144	-0.144	0.18	-0.026	-0.404*
		111.1	0.032*	-0.024*	-0.04*	-0.056*	-0.144	-0.144	0.18	-0.026	-0.304*
		111.2	0.032*	-0.024*	-0.04*	-0.056*	-0.144	-0.144	0.18	0.074	-0.304*
		111.3	-0.068*	-0.124*	-0.04*	-0.056*	-0.144	-0.144	0.18	0.074	-0.204*
		111.4	-0.068*	-0.124*	-0.04*	-0.056*	-0.144	-0.144	0.18	0.074	-0.204*
		111.5	-0.068*	-0.124*	-0.04*	-0.056*	-0.044	-0.144	0.18	0.074	-0.204*
		111.6	-0.068*	-0.124*	0.06*	-0.056*	-0.144	-0.144	0.18	0.074	-0.204*
		111.7	-0.068*	-0.124*	0.06*	-0.056*	-0.144	-0.144	0.18	0.074	-0.204*
		111.8	-0.068*	-0.124*	0.06*	-0.056*	-0.144	-0.144	0.08	-0.026	-0.204*
		111.9	-0.068*	-0.124*	0.06*	-0.056*	-0.144	-0.144	0.08	-0.026	-0.204*
		112	-0.068*	-0.124*	-0.04*	-0.156*	-0.144	-0.144	0.18	-0.126	-0.204*
		112.1	0.032*	-0.124*	0.06*	-0.056*	-0.144	-0.144	0.28	-0.026	-0.204*
		112.2	0.032*	-0.024*	0.06*	0.044*	-0.144	-0.144	0.28	-0.026	-0.204*
		112.3	0.032*	-0.024*	0.06*	0.044*	-0.144	-0.144	0.28	-0.026	-0.204*
		112.4	0.032*	-0.024*	0.06*	0.044*	-0.144	-0.144	0.28	0.074	-0.204*
		112.5	0.032*	-0.024*	0.06*	0.044*	-0.144	-0.144	0.28	0.074	-0.204*
		112.6	0.032*	-0.024*	0.06*	0.044*	-0.144	-0.144	0.28	0.074	-0.204*
		112.7	0.132*	0.076*	0.06*	0.044*	-0.144	-0.144	0.28	0.074	-0.204*
		112.8	0.132*	0.076*	-0.04*	0.044*	-0.244	-0.244	0.18	0.074	-0.204*
		112.9	0.132*	0.076*	-0.14*	-0.056*	-0.244	-0.244	0.18	0.074	-0.104*
		113	0.132*	0.076*	-0.14*	-0.056*	-0.244	-0.244	0.18	0.074	-0.004*
		113.1	0.132*	-0.024*	-0.04*	-0.056*	-0.144	-0.244	0.18	0.074	-0.104*
		113.2	0.132*	-0.024*	-0.04*	-0.056*	-0.144	-0.144	0.08	-0.026	-0.104*
		113.3	0.032*	-0.024*	-0.04*	-0.156*	-0.144	-0.144	0.08	0.074	-0.104*
		113.4	0.032*	-0.024*	-0.04*	-0.156*	-0.044	-0.144	0.18	0.074	-0.104*
		113.5	0.032*	-0.024*	-0.04*	-0.156*	-0.044	-0.144	0.18	0.074	-0.104*
		113.6	0.032*	-0.024*	-0.04*	-0.156*	-0.044	-0.144	0.18	0.074	-0.204*
		113.7	0.032*	-0.024*	-0.04*	-0.156*	-0.144	-0.144	0.18	0.074	-0.204*
		113.8	0.032*	-0.024*	-0.04*	-0.156*	-0.144	-0.144	0.18	0.074	-0.204*
		113.9	0.132*	0.076*	-0.04*	-0.056*	-0.144	-0.144	0.28	0.174	-0.104*
		114	0.132*	0.076*	0.06*	0.044*	-0.144	-0.144	0.28	0.174	-0.104*
		114.1	0.132*	0.076*	0.06*	0.044*	-0.144	-0.144	0.28	0.174	-0.104*
		114.2	0.232*	0.076*	-0.04*	-0.056*	-0.144	-0.144	0.28	0.174	-0.104*
		114.3	0.232*	0.076*	-0.04*	-0.056*	-0.144	-0.144	0.28	0.174	-0.104*
		114.4	0.232*	0.076*	-0.04*	-0.056*	-0.144	-0.144	0.28	0.274	-0.104*
		114.5	0.232*	0.076*	-0.04*	-0.056*	-0.144	-0.144	0.28	0.274	-0.104*
		114.6	0.032*	-0.024*	-0.04*	-0.056*	-0.144	-0.044	0.28	0.274	-0.004*
		114.7	0.032*	-0.024*	-0.04*	-0.056*	-0.144	-0.044	0.18	0.174	-0.104*
		114.8	0.132*	0.076*	-0.04*	-0.056*	-0.244	-0.144	0.28	0.174	-0.104*
		114.9	0.132*	0.076*	0.06*	-0.056*	-0.244	-0.144	0.28	0.174	-0.104*
		115	0.132*	0.076*	0.06*	-0.056*	-0.244	-0.144	0.28	0.174	-0.004*
		115.1	0.132*	0.076*	0.06*	-0.056*	-0.244	-0.144	0.28	0.174	-0.004*
		115.2	0.132*	0.076*	0.06*	-0.056*	-0.244	-0.144	0.28	0.174	-0.004*
		115.3	0.132*	-0.024*	0.06*	0.044*	-0.244	-0.144	0.28	0.174	-0.104*
		115.4	0.132*	-0.024*	0.06*	0.044*	-0.244	-0.144	0.28	0.174	-0.004*
		115.5	0.132*	-0.024*	0.06*	0.044*	-0.244	-0.144	0.28	0.174	-0.004*
		115.6	0.232*	-0.024*	-0.04*	0.044*	-0.244	-0.244	0.28	0.074	-0.004*
		115.7	0.232*	-0.024*	-0.04*	-0.056*	-0.244	-0.144	0.28	0.074	-0.004*
		115.8	0.232*	-0.024*	-0.04*	-0.056*	-0.144	-0.144	0.28	0.074	-0.004*
		115.9	0.232*	-0.024*	-0.14*	-0.156*	-0.044	-0.144	0.18	0.074	-0.004*
		116	0.232*	-0.024*	-0.14*	-0.156*	-0.144	-0.144	0.18	0.074	-0.004*
		116.1	0.232*	-0.024*	-0.04*	-0.056*	-0.144	-0.144	0.18	0.074	-0.004*
		116.2	0.232*	-0.024*	-0.04*	-0.056*	-0.244	-0.244	0.18	0.074	-0.004*
		116.3	0.232*	-0.024*	-0.04*	-0.056*	-0.244	-0.244	0.18	0.074	-0.004*
		116.4	0.132*	-0.124*	-0.04*	-0.056*	-0.244	-0.244	0.28	0.174	-0.004*
		116.5	0.132*	-0.124*	-0.04*	-0.056*	-0.244	-0.244	0.28	0.174	-0.004*
		116.6	0.132*	-0.124*	-0.04*	-0.056*	-0.244	-0.244	0.28	0.174	-0.104*
		116.7	0.132*	-0.124*	-0.04*	-0.056*	-0.244	-0.244	0.18	0.074	-0.104*
		116.8	0.132*	-0.124*	0.06*	-0.056*	-0.244	-0.244	0.28	0.274	-0.104*
		116.9	0.132*	-0.024*	0.06*	0.044*	-0.244	-0.244	0.28	0.174	-0.204*
		117	0.132*	-0.024*	0.06*	0.044*	-0.244	-0.144	0.28	0.174	-0.204*
		117.1	0.132*	-0.024*	0.06*	0.044*	-0.244	-0.144	0.28	0.174	-0.204*
		117.2	0.132*	-0.024*	0.06*	0.044*	-0.244	-0.144	0.28	0.174	-0.104*
		117.3	0.132*	-0.024*	0.06*	0.044*	-0.244	-0.144	0.28	0.174	-0.104*
		117.4	0.132*	-0.024*	0.06*	0.044*	-0.244	-0.144	0.28	0.174	-0.104*
		117.5	0.232*	0.076*	0.06*	0.044*	-0.244	-0.144	0.28	0.174	-0.104*
		117.6	0.232*	0.076*	0.06*	0.044*	-0.244	-0.144	0.28	0.174	-0.104*
		117.7	0.232*	0.076*	0.06*	0.044*	-0.244	-0.144	0.28	0.174	-0.104*
		117.8	0.132*	0.076*	-0.14*	-0.056*	-0.144	-0.044	0.28	0.174	-0.104*
		117.9	0.132*	-0.024*	-0.14*	-0.056*	-0.144	-0.044	0.28	0.174	-0.104*
		118	0.132*	-0.024*	-0.14*	-0.056*	-0.144	-0.044	0.28	0.174	-0.204*
		118.1	0.232*	-0.024*	-0.14*	-0.056*	-0.144	-0.044	0.28	0.174	-0.204*
		118.2	0.132*	-0.124*	-0.14*	-0.056*	-0.144	-0.044	0.18	0.174	-0.304*
		118.3	0.132*	-0.124*	-0.14*	-0.056*	-0.144	-0.144	0.18	0.174	-0.304*
		118.4	0.132*	-0.124*	-0.04*	-0.156*	-0.144	-0.144	0.08	0.074	-0.304*
		118.5	0.132*	-0.124*	0.06*	-0.056*	-0.144	-0.144	0.18	0.074	-0.304*
		118.6	0.132*	-0.124*	0.06*	-0.056*	-0.144	-0.144	0.28	0.174	-0.304*
		118.7	0.132*	-0.124*	0.06*	-0.056*	-0.144	-0.144	0.28	0.174	-0.304*
		118.8	0.132*	-0.024*	0.06*	0.044*	-0.144	-0.144	0.28	0.174	-0.304*
		118.9	0.132*	-0.024*	0.06*	0.044*	-0.144	-0.244	0.28	0.174	-0.304*
		119	0.032*	-0.024*	0.06*	0.044*	-0.144	-0.244	0.28	0.174	-0.304*
		119.1	0.032*	-0.024*	0.06*	0.044*	-0.144	-0.144	0.28	0.174	-0.304*
		119.2	0.032*	-0.124*	0.06*	0.044*	-0.144	-0.144	0.28	0.174	-0.304*
		119.3	0.032*	-0.124*	0.06*	0.044*	-0.244	-0.144	0.28	0.174	-0.204*
		119.4	0.032*	-0.124*	0.06*	0.044*	-0.244	-0.144	0.28	0.174	-0.204*
		119.5	0.032*	-0.124*	0.06*	0.044*	-0.244	-0.144	0.18	0.074	-0.304*
		119.6	0.032*	-0.124*	-0.04*	-0.056*	-0.244	-0.144	0.18	0.074	-0.104*
		119.7	0.032*	-0.124*	-0.04*	-0.056*	-0.244	-0.144	0.18	0.074	-0.104*
		119.8	0.032*	-0.124*	-0.04*	-0.056*	-0.244	-0.144	0.18	0.074	-0.204*
		119.9	0.132*	-0.124*	-0.04*	-0.056*	-0.144	-0.144	0.18	0.074	-0.204*
		120	0.132*	-0.124*	-0.14*	-0.056*	-0.144	-0.144	0.18	0.074	-0.204*
		120.1	0.132*	-0.124*	-0.14*	-0.056*	-0.144	-0.144	0.18	0.174	-0.204*
		120.2	0.132*	-0.024*	-0.14*	-0.056*	-0.144	-0.244	0.18	0.174	-0.204*
		120.3	0.232*	0.076*	-0.14*	-0.056*	-0.144	-0.244	0.18	0.174	-0.204*
		120.4	0.232*	0.076*	-0.14*	-0.056*	-0.144	-0.144	0.18	0.174	-0.304*
		120.5	0.232*	0.076*	-0.04*	-0.056*	-0.144	-0.144	0.18	0.174	-0.304*
		120.6	0.232*	0.076*	-0.04*	-0.156*	-0.144	-0.144	0.18	0.174	-0.304*
		120.7	0.232*	0.076*	-0.04*	-0.156*	-0.044	-0.044	0.18	0.174	-0.304*
		120.8	0.232*	-0.024*	-0.04*	-0.156*	-0.044	-0.044	0.18	0.174	-0.304*
		120.9	0.232*	-0.024*	-0.04*	-0.056*	-0.044	-0.044	0.18	0.174	-0.204*
		121	0.232*	-0.024*	-0.14*	-0.156*	-0.044	-0.044	0.18	0.174	-0.204*
		121.1	0.232*	-0.024*	-0.14*	-0.156*	-0.044	-0.044	0.18	0.174	-0.304*
		121.2	0.132*	-0.124*	-0.04*	-0.056*	-0.044	-0.044	0.18	0.274	-0.304*
		121.3	0.132*	-0.124*	-0.04*	-0.056*	-0.044	-0.044	0.28	0.174	-0.304*
		121.4	0.132*	-0.124*	-0.04*	-0.056*	-0.044	-0.044	0.28	0.174	-0.304*
		121.5	0.132*	-0.024*	-0.04*	-0.056*	-0.044	-0.044	0.18	0.074	-0.304*
		121.6	0.132*	-0.024*	-0.04*	-0.056*	-0.044	-0.144	0.18	0.074	-0.204*
		121.7	0.132*	-0.024*	-0.04*	-0.056*	-0.044	-0.144	0.18	-0.026	-0.204*
		121.8	0.032*	-0.024*	-0.04*	-0.056*	-0.044	-0.144	0.18	0.074	-0.204*
		121.9	0.032*	-0.024*	-0.04*	-0.056*	-0.044	-0.044	0.18	0.074	-0.204*
		122	0.032*	-0.024*	-0.04*	-0.056*	-0.044	-0.044	0.18	0.074	-0.204*
		122.1	0.032*	-0.024*	-0.04*	-0.156*	-0.044	-0.044	0.18	0.074	-0.104*
		122.2	0.132*	-0.024*	-0.04*	-0.156*	-0.044	-0.144	0.18	0.074	-0.104*
		122.3	0.132*	-0.024*	-0.04*	-0.156*	-0.044	-0.144	0.18	0.074	-0.104*
		122.4	0.132*	-0.024*	-0.04*	-0.156*	-0.044	-0.144	0.18	0.074	-0.104*
		122.5	0.132*	-0.024*	-0.04*	-0.156*	-0.044	-0.144	0.18	0.074	-0.204*
		122.6	0.232*	0.076*	-0.04*	-0.156*	-0.044	-0.144	0.18	0.074	-0.204*
		122.7	0.232*	0.076*	-0.04*	-0.156*	0.056	-0.144	0.18	0.074	-0.204*
		122.8	0.132*	-0.024*	0.06*	-0.056*	-0.044	-0.144	0.18	0.074	-0.104*
		122.9	0.132*	-0.024*	0.06*	0.044*	-0.044	-0.144	0.18	0.074	-0.104*
		123	0.132*	-0.024*	0.06*	0.044*	-0.044	-0.144	0.28	0.174	-0.104*
		123.1	0.132*	-0.024*	0.06*	0.044*	-0.044	-0.144	0.18	0.074	-0.104*
		123.2	0.132*	-0.024*	-0.04*	-0.056*	-0.044	-0.144	0.28	0.074	-0.104*
		123.3	0.132*	-0.024*	-0.04*	-0.056*	-0.044	-0.144	0.18	-0.026	-0.104*
		123.4	0.132*	-0.024*	0.06*	-0.056*	-0.044	-0.044	0.18	-0.026	-0.104*
		123.5	0.132*	-0.024*	0.06*	-0.056*	-0.044	-0.044	0.18	-0.026	-0.104*
		123.6	0.132*	-0.024*	0.06*	-0.156*	-0.044	-0.044	0.18	-0.026	-0.104*
		123.7	0.132*	-0.024*	0.06*	-0.156*	-0.044	-0.044	0.18	-0.026	-0.104*
		123.8	0.132*	0.076*	0.06*	-0.156*	-0.044	-0.044	0.08	-0.126	-0.004*
		123.9	0.232*	0.076*	0.06*	-0.156*	-0.144	-0.044	0.08	-0.126	-0.004*
		124	0.232*	0.076*	0.06*	-0.156*	-0.144	-0.044	0.18	-0.126	-0.004*
		124.1	0.232*	0.076*	0.06*	-0.156*	-0.044	0.056	0.28	-0.026	-0.004*
		124.2	0.232*	0.076*	0.06*	-0.156*	-0.044	0.056	0.28	-0.026	-0.004*
		124.3	0.132*	-0.024*	0.06*	-0.156*	-0.044	0.056	0.28	-0.026	-0.004*
		124.4	0.132*	-0.024*	0.06*	-0.156*	-0.044	0.056	0.28	-0.026	-0.004*
		124.5	0.232*	0.076*	0.06*	-0.056*	-0.044	-0.044	0.28	-0.026	-0.004*
		124.6	0.232*	0.076*	0.16*	-0.056*	0.056	-0.044	0.18	0.074	-0.004*
		124.7	0.232*	0.076*	0.16*	0.044*	0.056	-0.044	0.18	0.074	-0.004*
		124.8	0.132*	0.076*	0.16*	0.044*	0.056	-0.044	0.18	0.074	-0.004*
		124.9	0.132*	0.076*	0.06*	-0.056*	-0.144	-0.144	0.18	0.074	-0.004*
		125	0.132*	0.076*	0.06*	-0.056*	-0.144	-0.144	0.18	0.074	-0.004*
		125.1	0.132*	0.076*	0.06*	-0.056*	-0.144	-0.144	0.18	0.074	-0.004*
		125.2	0.132*	0.076*	0.06*	-0.056*	-0.144	-0.144	0.18	0.074	-0.004*
		125.3	0.032*	-0.024*	0.06*	-0.056*	-0.144	-0.144	0.18	-0.026	-0.104*
		125.4	0.032*	-0.024*	0.06*	-0.156*	-0.144	-0.144	0.18	-0.026	-0.104*
		125.5	0.032*	-0.024*	0.06*	-0.156*	-0.144	-0.044	0.28	0.074	-0.104*
		125.6	0.132*	-0.024*	0.06*	-0.156*	-0.144	-0.044	0.28	0.074	-0.104*
		125.7	0.132*	-0.024*	0.06*	-0.156*	-0.144	-0.044	0.28	0.074	-0.104*
		125.8	0.132*	-0.124*	0.06*	-0.156*	-0.144	-0.044	0.38	0.074	-0.104*
		125.9	0.132*	-0.124*	0.06*	-0.156*	-0.244	-0.044	0.38	0.074	-0.104*
		126	0.132*	-0.024*	0.06*	-0.156*	-0.244	-0.044	0.38	0.074	-0.204*
		126.1	0.132*	-0.024*	0.06*	-0.156*	-0.244	-0.044	0.28	-0.026	-0.204*
		126.2	0.132*	-0.024*	0.06*	-0.156*	-0.244	-0.044	0.28	0.074	-0.204*
		126.3	0.132*	-0.024*	0.16*	-0.156*	-0.244	-0.044	0.28	0.074	-0.204*
		126.4	0.132*	-0.024*	0.16*	-0.056*	-0.244	-0.044	0.28	0.074	-0.204*
		126.5	0.032*	-0.124*	0.06*	-0.156*	-0.244	-0.044	0.28	0.074	-0.204*
		126.6	0.032*	-0.124*	0.06*	-0.156*	-0.244	-0.044	0.28	0.074	-0.204*
		126.7	0.132*	-0.124*	0.16*	-0.056*	-0.244	-0.044	0.18	0.074	-0.104*
		126.8	0.132*	-0.124*	0.16*	-0.056*	-0.144	-0.044	0.18	0.074	-0.104*
		126.9	0.132*	-0.124*	0.16*	-0.056*	-0.144	-0.044	0.28	0.174	-0.104*
		127	0.132*	-0.124*	0.16*	-0.056*	-0.244	-0.044	0.28	0.174	-0.104*
		127.1	0.132*	-0.124*	0.16*	-0.056*	-0.144	-0.044	0.28	0.074	-0.104*
		127.2	0.132*	-0.024*	0.16*	-0.056*	-0.244	-0.244	0.28	0.074	-0.004*
		127.3	0.232*	-0.024*	0.16*	-0.056*	-0.244	-0.244	0.28	0.174	-0.004*
		127.4	0.132*	-0.124*	0.16*	-0.056*	-0.244	-0.244	0.28	0.174	-0.104*
		127.5	0.132*	-0.124*	0.16*	-0.056*	-0.244	-0.244	0.18	0.074	-0.104*
		127.6	0.132*	-0.124*	0.06*	0.044*	-0.244	-0.244	0.28	0.074	-0.104*
		127.7	0.132*	-0.124*	0.06*	-0.056*	-0.144	-0.044	0.28	0.074	-0.204*
		127.8	0.132*	-0.124*	0.06*	-0.056*	-0.144	-0.044	0.28	0.074	-0.204*
		127.9	0.132*	-0.124*	-0.04*	-0.156*	-0.144	-0.044	0.28	0.074	-0.204*
		128	0.132*	-0.124*	-0.04*	-0.156*	-0.144	-0.044	0.28	0.074	-0.204*
		128.1	0.132*	-0.024*	-0.04*	-0.156*	-0.144	-0.044	0.28	0.074	-0.204*
		128.2	0.132*	-0.124*	-0.04*	-0.156*	-0.144	-0.044	0.38	0.174	-0.204*
		128.3	0.132*	-0.124*	-0.04*	-0.156*	-0.144	-0.044	0.38	0.274	-0.204*
		128.4	0.132*	-0.124*	-0.04*	-0.156*	-0.244	-0.144	0.28	0.274	-0.204*
		128.5	0.032*	-0.224*	0.06*	-0.056*	-0.244	-0.144	0.28	0.274	-0.204*
		128.6	0.032*	-0.224*	0.06*	0.044*	-0.244	-0.144	0.18	0.174	-0.204*
		128.7	0.032*	-0.224*	-0.04*	0.044*	-0.244	-0.144	0.18	0.174	-0.204*
		128.8	0.032*	-0.224*	-0.04*	0.044*	-0.244	-0.144	0.18	0.174	-0.304*
		128.9	0.032*	-0.224*	-0.14*	-0.056*	-0.244	-0.144	0.18	0.174	-0.204*
		129	0.132*	-0.224*	-0.14*	-0.056*	-0.144	-0.144	0.18	0.174	-0.204*
		129.1	0.132*	-0.224*	-0.14*	-0.056*	-0.144	-0.144	0.18	0.174	-0.204*
		129.2	0.232*	-0.124*	-0.14*	-0.056*	-0.244	-0.144	0.18	0.174	-0.204*
		129.3	0.232*	-0.124*	-0.14*	-0.056*	-0.244	-0.144	0.28	0.174	-0.204*
		129.4	0.232*	-0.124*	-0.14*	-0.056*	-0.144	-0.144	0.28	0.174	-0.204*
		129.5	0.232*	-0.124*	-0.14*	-0.056*	-0.144	-0.144	0.28	0.174	-0.204*
		129.6	0.232*	-0.124*	-0.14*	-0.056*	-0.244	-0.244	0.28	0.174	-0.204*
		129.7	0.232*	-0.124*	-0.04*	-0.056*	-0.244	-0.244	0.28	0.174	-0.204*
		129.8	0.132*	-0.124*	-0.04*	-0.056*	-0.244	-0.244	0.28	0.174	-0.204*
		129.9	0.032*	-0.124*	-0.04*	-0.056*	-0.244	-0.244	0.28	0.174	-0.204*
		130	0.032*	-0.124*	-0.04*	-0.056*	-0.144	-0.144	0.28	0.174	-0.204*
		130.1	0.032*	-0.124*	-0.04*	0.044*	-0.144	-0.144	0.28	0.174	-0.304*
		130.2	0.032*	-0.124*	-0.04*	0.044*	-0.144	-0.144	0.28	0.274	-0.304*
		130.3	0.032*	-0.124*	-0.04*	0.044*	-0.144	-0.144	0.18	0.074	-0.304*
		130.4	0.032*	-0.124*	-0.04*	0.044*	-0.144	-0.144	0.18	0.074	-0.204*
		130.5	0.032*	-0.124*	-0.04*	0.044*	-0.144	-0.044	0.08	0.074	-0.104*
		130.6	0.132*	-0.024*	-0.04*	0.144*	-0.144	-0.044	0.08	0.074	-0.104*
		130.7	0.132*	-0.024*	-0.14*	0.044*	-0.144	-0.044	0.08	0.074	-0.104*
		130.8	0.132*	-0.024*	-0.14*	0.044*	-0.244	-0.144	0.08	0.074	-0.104*
		130.9	0.132*	-0.024*	-0.14*	0.044*	-0.244	-0.144	0.18	0.174	-0.204*
		131	0.232*	-0.024*	-0.04*	0.044*	-0.244	-0.144	0.18	0.174	-0.204*
		131.1	0.232*	-0.024*	-0.04*	0.044*	-0.244	-0.144	0.18	0.174	-0.204*
		131.2	0.232*	-0.024*	-0.04*	0.044*	-0.244	-0.144	0.18	0.174	-0.204*
		131.3	0.232*	-0.024*	-0.04*	-0.056*	-0.344	-0.144	0.28	0.174	-0.204*
		131.4	0.232*	-0.024*	-0.04*	-0.056*	-0.244	-0.044	0.28	0.174	-0.204*
		131.5	0.132*	-0.024*	-0.04*	-0.056*	-0.244	-0.044	0.28	0.174	-0.204*
		131.6	0.132*	0.076*	-0.04*	-0.056*	-0.144	-0.044	0.18	0.074	-0.204*
		131.7	0.132*	0.076*	-0.04*	-0.056*	-0.144	-0.044	0.18	0.074	-0.204*
		131.8	0.132*	0.076*	-0.04*	-0.056*	-0.144	-0.144	0.18	0.074	-0.204*
		131.9	0.232*	0.076*	-0.04*	-0.056*	-0.044	-0.144	0.18	0.074	-0.204*
		132	0.132*	-0.024*	-0.04*	-0.056*	-0.044	-0.144	0.18	0.074	-0.204*
		132.1	0.132*	-0.024*	-0.04*	-0.056*	-0.044	-0.044	0.18	0.074	-0.204*
		132.2	0.132*	-0.024*	-0.04*	-0.056*	-0.144	-0.044	0.08	0.074	-0.204*
		132.3	0.132*	-0.024*	-0.04*	0.044*	-0.144	-0.044	0.08	0.174	-0.104*
		132.4	0.132*	-0.024*	-0.04*	0.044*	-0.144	-0.044	0.08	0.174	-0.104*
		132.5	0.132*	-0.024*	-0.04*	0.044*	-0.144	-0.044	0.08	0.174	-0.104*
		132.6	0.132*	-0.024*	0.06*	0.044*	-0.144	-0.044	0.08	0.174	-0.104*
		132.7	0.132*	-0.024*	0.06*	0.044*	-0.144	-0.044	0.08	0.174	-0.104*
		132.8	0.132*	0.076*	0.06*	0.044*	-0.144	-0.044	0.08	0.174	-0.104*
		132.9	0.232*	0.076*	0.06*	0.044*	-0.244	-0.144	0.08	0.074	-0.204*
		133	0.232*	0.076*	0.16*	0.144*	-0.144	-0.044	0.08	0.074	-0.204*
		133.1	0.232*	0.076*	0.06*	0.044*	-0.144	-0.044	0.08	0.074	-0.204*
		133.2	0.232*	0.076*	0.06*	0.044*	-0.144	-0.044	-0.02	-0.026	-0.204*
		133.3	0.232*	0.076*	0.06*	0.044*	-0.144	-0.044	-0.02	-0.026	-0.204*
		133.4	0.232*	0.076*	0.06*	0.044*	-0.144	-0.144	0.08	-0.026	-0.204*
		133.5	0.132*	0.076*	0.06*	0.044*	-0.144	-0.144	0.08	-0.026	-0.204*
		133.6	0.132*	0.076*	0.06*	0.044*	-0.144	-0.144	0.18	0.174	-0.104*
		133.7	0.232*	0.076*	0.06*	0.044*	-0.144	-0.144	0.18	0.174	-0.104*
		133.8	0.232*	0.076*	0.06*	0.044*	-0.144	-0.144	0.08	0.174	-0.104*
		133.9	0.132*	-0.024*	0.06*	0.044*	-0.144	-0.144	0.08	0.174	-0.104*
		134	0.132*	-0.024*	0.06*	0.044*	-0.144	-0.044	0.08	0.174	-0.104*
		134.1	0.132*	-0.024*	0.06*	0.044*	-0.144	-0.044	0.08	0.174	-0.104*
		134.2	0.132*	-0.024*	0.06*	0.044*	-0.144	-0.044	0.08	0.174	-0.104*
		134.3	0.232*	-0.024*	0.06*	0.044*	-0.044	-0.044	0.08	0.174	-0.104*
		134.4	0.232*	0.076*	0.06*	0.044*	-0.044	-0.044	0.08	0.174	-0.104*
		134.5	0.232*	0.076*	0.06*	0.144*	-0.044	-0.144	0.08	0.174	-0.104*
		134.6	0.232*	0.076*	0.06*	0.144*	-0.044	-0.144	0.08	0.174	-0.104*
		134.7	0.232*	0.076*	0.06*	0.144*	-0.144	-0.144	0.18	0.174	-0.104*
		134.8	0.132*	0.076*	0.06*	0.144*	-0.144	-0.144	0.18	0.174	-0.104*
		134.9	0.132*	0.076*	0.16*	0.144*	-0.144	-0.144	0.08	0.074	-0.104*
		135	0.132*	0.076*	0.16*	0.144*	-0.144	-0.144	0.08	0.074	-0.104*
		135.1	0.232*	0.076*	0.16*	0.144*	-0.144	-0.144	0.08	-0.026	-0.104*
		135.2	0.232*	0.076*	0.16*	0.144*	-0.144	-0.144	0.08	-0.026	-0.104*
		135.3	0.232*	0.076*	0.16*	0.144*	-0.144	-0.144	-0.02	0.074	-0.104*
		135.4	0.232*	0.076*	0.16*	0.144*	-0.144	-0.144	0.08	0.174	-0.104*
		135.5	0.232*	0.076*	0.16*	0.144*	-0.144	-0.144	0.08	0.174	-0.104*
		135.6	0.232*	0.076*	0.26*	0.244*	-0.144	-0.144	0.08	0.174	-0.104*
		135.7	0.232*	0.076*	0.16*	0.144*	-0.144	-0.144	0.18	0.174	-0.104*
		135.8	0.232*	0.076*	0.16*	0.144*	-0.244	-0.144	0.18	0.174	-0.104*
		135.9	0.232*	0.076*	0.16*	0.144*	-0.244	-0.144	0.18	0.174	-0.104*
		136	0.232*	-0.024*	0.16*	0.144*	-0.244	-0.244	0.18	0.174	-0.004*
		136.1	0.232*	-0.024*	0.16*	0.144*	-0.244	-0.344	0.18	0.174	-0.004*
		136.2	0.232*	-0.024*	0.16*	0.144*	-0.244	-0.344	-0.02	0.074	-0.104*
		136.3	0.232*	-0.024*	0.16*	0.144*	-0.244	-0.344	-0.02	0.074	-0.104*
		136.4	0.232*	-0.024*	0.16*	0.144*	-0.244	-0.344	-0.02	0.074	-0.104*
		136.5	0.132*	-0.124*	0.16*	0.144*	-0.244	-0.344	-0.02	0.174	-0.104*
		136.6	0.032*	-0.124*	0.16*	0.144*	-0.244	-0.344	-0.02	0.074	-0.104*
		136.7	0.132*	-0.124*	0.16*	0.144*	-0.244	-0.344	-0.02	0.074	-0.104*
		136.8	0.132*	-0.024*	0.16*	0.044*	-0.244	-0.344	-0.02	0.074	-0.004*
		136.9	0.132*	-0.024*	0.16*	0.044*	-0.144	-0.244	0.08	0.174	-0.004*
		137	0.132*	-0.024*	0.16*	0.044*	-0.144	-0.244	0.18	0.174	-0.004*
		137.1	0.132*	-0.024*	0.16*	0.044*	-0.144	-0.244	0.18	0.174	-0.004*
		137.2	0.132*	-0.024*	0.16*	0.044*	-0.144	-0.244	0.18	0.174	-0.004*
		137.3	0.132*	-0.024*	0.16*	0.044*	-0.244	-0.244	0.08	0.074	-0.004*
		137.4	0.132*	-0.024*	0.16*	0.044*	-0.244	-0.244	-0.02	0.074	-0.104*
		137.5	0.132*	-0.024*	0.16*	0.044*	-0.244	-0.244	-0.02	0.074	-0.104*
		137.6	0.132*	-0.024*	0.06*	0.044*	-0.244	-0.244	-0.02	0.074	-0.104*
		137.7	0.132*	-0.024*	0.06*	0.044*	-0.244	-0.244	-0.02	0.074	-0.104*
		137.8	0.132*	-0.024*	0.06*	0.044*	-0.244	-0.244	0.08	0.174	-0.104*
		137.9	0.132*	-0.024*	-0.04*	-0.056*	-0.244	-0.244	0.08	0.174	-0.104*
		138	0.132*	-0.024*	-0.04*	-0.056*	-0.244	-0.244	0.08	0.174	-0.104*
		138.1	0.132*	-0.024*	0.06*	0.044*	-0.144	-0.144	0.08	0.174	-0.104*
		138.2	0.232*	0.076*	0.06*	0.044*	-0.144	-0.144	0.18	0.174	-0.104*
		138.3	0.232*	0.076*	0.06*	0.044*	-0.144	-0.144	0.18	0.174	-0.004*
		138.4	0.232*	0.076*	0.06*	0.044*	-0.244	-0.144	0.08	0.174	-0.004*
		138.5	0.232*	0.076*	0.06*	0.144*	-0.244	-0.144	0.08	0.174	-0.104*
		138.6	0.232*	0.076*	0.06*	0.144*	-0.244	-0.144	0.08	0.174	-0.104*
		138.7	0.232*	0.076*	0.06*	0.144*	-0.244	-0.144	0.08	0.174	-0.004*
		138.8	0.232*	0.076*	0.06*	0.144*	-0.244	-0.144	0.08	0.174	-0.004*
		138.9	0.132*	-0.024*	0.06*	0.044*	-0.344	-0.244	0.08	0.174	-0.004*
		139	0.132*	-0.024*	0.06*	0.044*	-0.344	-0.244	0.08	0.174	-0.004*
		139.1	0.132*	-0.024*	0.06*	0.044*	-0.344	-0.244	-0.02	0.074	-0.104*
		139.2	0.132*	-0.024*	0.06*	0.044*	-0.344	-0.244	-0.02	0.074	-0.104*
		139.3	0.232*	0.076*	0.16*	0.044*	-0.344	-0.244	-0.02	0.074	-0.104*
		139.4	0.232*	-0.024*	-0.04*	-0.056*	-0.344	-0.244	0.08	0.174	-0.104*
		139.5	0.232*	-0.024*	-0.04*	-0.056*	-0.344	-0.244	0.08	0.274	-0.104*
		139.6	0.232*	-0.024*	-0.04*	-0.056*	-0.244	-0.144	0.18	0.274	-0.104*
		139.7	0.232*	-0.024*	-0.04*	-0.056*	-0.144	-0.144	0.18	0.274	-0.104*
		139.8	0.232*	-0.024*	-0.04*	-0.056*	-0.144	-0.144	0.18	0.274	-0.104*
		139.9	0.232*	-0.024*	-0.04*	-0.056*	-0.144	-0.144	0.18	0.274	-0.104*
		140	0.232*	-0.024*	-0.04*	-0.056*	-0.144	-0.144	0.18	0.274	-0.204*
		140.1	0.132*	-0.024*	-0.04*	-0.056*	-0.144	-0.144	0.08	0.274	-0.204*
		140.2	0.132*	-0.024*	-0.14*	-0.256*	-0.144	-0.144	0.08	0.274	-0.104*
		140.3	0.132*	-0.024*	-0.14*	-0.156*	-0.144	-0.144	0.08	0.274	-0.204*
		140.4	0.132*	-0.024*	-0.14*	-0.156*	-0.144	-0.144	0.08	0.174	-0.204*
		140.5	0.232*	-0.024*	-0.14*	-0.156*	-0.244	-0.144	0.08	0.174	-0.204*
		140.6	0.232*	-0.024*	-0.14*	-0.156*	-0.244	-0.144	0.08	0.174	-0.104*
		140.7	0.132*	-0.124*	-0.04*	-0.056*	-0.244	-0.044	0.08	0.274	-0.104*
		140.8	0.132*	-0.124*	-0.04*	-0.056*	-0.244	-0.044	0.08	0.274	-0.104*
		140.9	0.132*	-0.124*	-0.14*	-0.056*	-0.244	-0.044	0.08	0.274	-0.104*
		141	0.132*	-0.124*	-0.14*	-0.056*	-0.244	-0.144	0.08	0.274	-0.104*
		141.1	0.132*	-0.124*	-0.14*	-0.056*	-0.244	-0.144	0.08	0.274	-0.104*
		141.2	0.132*	-0.024*	-0.14*	-0.056*	-0.244	-0.144	0.08	0.274	-0.104*
		141.3	0.132*	-0.024*	-0.14*	-0.056*	-0.244	-0.144	0.08	0.274	-0.104*
		141.4	0.132*	-0.024*	-0.14*	-0.056*	-0.244	-0.144	0.08	0.274	-0.104*
		141.5	0.132*	-0.024*	-0.14*	-0.056*	-0.244	-0.144	0.08	0.274	-0.104*
		141.6	0.132*	-0.024*	-0.04*	-0.056*	-0.244	-0.144	-0.02	0.174	-0.104*
		141.7	0.132*	-0.024*	-0.14*	-0.156*	-0.244	-0.144	-0.02	0.174	-0.104*
		141.8	0.132*	-0.024*	-0.14*	-0.156*	-0.244	-0.144	0.08	0.174	-0.204*
		141.9	0.132*	-0.024*	-0.14*	-0.156*	-0.244	-0.144	0.08	0.174	-0.204*
		142	0.132*	-0.024*	-0.14*	-0.056*	-0.244	-0.144	0.08	0.174	-0.204*
		142.1	0.132*	-0.124*	-0.14*	-0.056*	-0.344	-0.244	0.08	0.174	-0.204*
		142.2	0.032*	-0.224*	-0.14*	-0.056*	-0.344	-0.244	-0.02	0.074	-0.204*
		142.3	0.032*	-0.224*	-0.14*	-0.056*	-0.344	-0.244	-0.02	0.074	-0.204*
		142.4	0.032*	-0.224*	-0.14*	-0.056*	-0.244	-0.244	-0.02	0.074	-0.204*
		142.5	0.032*	-0.224*	-0.14*	-0.056*	-0.244	-0.244	-0.02	0.074	-0.104*
		142.6	-0.068*	-0.224*	-0.14*	-0.056*	-0.244	-0.244	-0.02	0.174	-0.204*
		142.7	0.032*	-0.124*	-0.04*	-0.056*	-0.244	-0.244	-0.02	0.074	-0.204*
		142.8	0.032*	-0.124*	-0.04*	-0.056*	-0.244	-0.244	-0.02	0.074	-0.104*
		142.9	0.032*	-0.124*	0.06*	-0.056*	-0.244	-0.244	-0.02	0.174	-0.104*
		143	0.032*	-0.024*	0.06*	0.044*	-0.244	-0.244	-0.02	0.074	-0.104*
		143.1	0.032*	-0.024*	0.06*	0.044*	-0.244	-0.244	0.08	0.174	-0.104*
		143.2	0.032*	-0.024*	0.06*	0.044*	-0.144	-0.144	0.18	0.174	-0.104*
		143.3	0.032*	-0.024*	0.06*	0.044*	-0.144	-0.044	0.18	0.274	-0.104*
		143.4	0.032*	-0.024*	-0.04*	-0.056*	-0.144	-0.044	0.18	0.274	-0.104*
		143.5	0.032*	-0.024*	-0.04*	-0.056*	-0.144	-0.044	0.18	0.274	-0.104*
		143.6	0.032*	-0.024*	-0.04*	-0.056*	-0.244	-0.244	0.08	0.274	-0.204*
		143.7	-0.068*	-0.124*	-0.04*	-0.056*	-0.244	-0.244	0.08	0.174	-0.204*
		143.8	-0.068*	-0.124*	-0.04*	-0.056*	-0.244	-0.244	0.08	0.174	-0.204*
		143.9	-0.068*	-0.124*	-0.04*	-0.056*	-0.244	-0.244	0.08	0.174	-0.204*
		144	0.032*	-0.124*	-0.04*	-0.056*	-0.244	-0.244	0.08	0.174	-0.204*
		144.1	-0.068*	-0.124*	-0.04*	-0.056*	-0.244	-0.244	0.08	0.174	-0.204*
		144.2	-0.068*	-0.124*	-0.04*	-0.056*	-0.344	-0.244	0.08	0.174	-0.204*
		144.3	-0.068*	-0.224*	-0.04*	-0.056*	-0.244	-0.244	0.08	0.174	-0.204*
		144.4	-0.068*	-0.224*	-0.04*	-0.056*	-0.244	-0.244	0.08	0.174	-0.204*
		144.5	-0.068*	-0.224*	-0.04*	-0.056*	-0.244	-0.244	0.08	0.174	-0.204*
		144.6	-0.068*	-0.224*	-0.04*	-0.056*	-0.244	-0.244	-0.02	0.074	-0.204*
		144.7	-0.068*	-0.224*	-0.04*	-0.056*	-0.244	-0.244	-0.02	0.074	-0.204*
		144.8	-0.068*	-0.124*	0.06*	0.044*	-0.144	-0.144	-0.02	0.074	-0.204*
		144.9	0.032*	-0.024*	-0.04*	-0.056*	-0.144	-0.144	-0.02	0.074	-0.204*
		145	0.032*	-0.024*	-0.04*	-0.056*	-0.144	-0.144	0.08	0.074	-0.204*
		145.1	0.032*	-0.024*	-0.04*	-0.056*	-0.144	-0.144	0.08	0.074	-0.204*
		145.2	0.032*	-0.024*	-0.04*	-0.056*	-0.244	-0.244	0.08	0.174	-0.204*
		145.3	-0.068*	-0.124*	-0.04*	-0.056*	-0.244	-0.244	0.18	0.274	-0.204*
		145.4	-0.168*	-0.124*	-0.04*	-0.056*	-0.244	-0.244	0.18	0.174	-0.204*
		145.5	-0.168*	-0.124*	-0.04*	-0.056*	-0.244	-0.244	0.18	0.174	-0.204*
		145.6	-0.068*	-0.124*	-0.04*	-0.056*	-0.244	-0.144	0.18	0.174	-0.204*
		145.7	-0.068*	-0.124*	-0.04*	-0.056*	-0.244	-0.144	0.18	0.174	-0.104*
		145.8	-0.068*	-0.124*	-0.04*	-0.056*	-0.244	-0.144	0.18	0.174	-0.104*
		145.9	0.032*	-0.024*	-0.04*	-0.056*	-0.244	-0.144	-0.02	0.074	-0.104*
		146	0.032*	-0.024*	-0.14*	-0.056*	-0.244	-0.144	-0.02	0.074	-0.104*
		146.1	0.032*	-0.024*	-0.14*	-0.056*	-0.244	-0.144	0.08	0.074	-0.104*
		146.2	0.032*	-0.024*	-0.04*	-0.056*	-0.244	-0.144	0.08	0.074	-0.104*
		146.3	0.032*	-0.024*	-0.04*	-0.056*	-0.144	-0.044	0.08	0.074	-0.104*
		146.4	0.032*	-0.124*	-0.04*	-0.156*	-0.144	-0.044	0.08	0.074	-0.104*
		146.5	0.032*	-0.124*	-0.04*	-0.156*	-0.144	-0.044	0.08	0.074	-0.104*
		146.6	0.032*	-0.124*	-0.04*	-0.156*	-0.144	-0.044	0.08	0.074	-0.104*
		146.7	0.132*	0.076*	-0.04*	-0.156*	-0.144	-0.044	0.18	0.174	-0.104*
		146.8	0.132*	0.076*	-0.04*	-0.156*	-0.144	-0.044	0.18	0.174	-0.104*
		146.9	0.032*	0.076*	-0.04*	-0.156*	-0.144	-0.044	0.18	0.174	-0.104*
		147	0.032*	0.076*	-0.04*	-0.156*	-0.144	-0.044	0.18	0.174	-0.204*
		147.1	0.032*	0.076*	-0.14*	-0.256*	-0.144	-0.044	0.18	0.174	-0.204*
		147.2	-0.068*	-0.024*	-0.14*	-0.256*	-0.144	-0.044	0.18	0.174	-0.204*
		147.3	0.032*	-0.024*	-0.14*	-0.256*	-0.144	-0.044	0.18	0.174	-0.204*
		147.4	0.032*	-0.024*	-0.14*	-0.256*	-0.144	-0.044	0.18	0.174	-0.104*
		147.5	0.032*	-0.024*	-0.14*	-0.256*	-0.244	-0.144	0.08	0.074	-0.104*
		147.6	0.032*	-0.024*	-0.14*	-0.256*	-0.244	-0.144	0.08	0.074	-0.104*
		147.7	0.032*	-0.024*	-0.14*	-0.256*	-0.244	-0.144	0.08	0.074	-0.104*
		147.8	0.032*	-0.024*	-0.14*	-0.256*	-0.244	-0.144	0.08	0.074	-0.104*
		147.9	0.032*	-0.024*	-0.14*	-0.256*	-0.244	-0.144	0.08	-0.026	-0.104*
		148	0.032*	-0.024*	-0.04*	-0.156*	-0.244	-0.044	0.08	-0.026	-0.104*
		148.1	0.132*	0.076*	-0.04*	-0.056*	-0.244	-0.044	0.08	-0.026	-0.104*
		148.2	0.132*	0.076*	-0.04*	-0.056*	-0.244	-0.044	0.08	-0.026	-0.104*
		148.3	0.132*	0.076*	-0.04*	-0.056*	-0.244	-0.044	0.08	-0.026	-0.204*
		148.4	0.132*	0.076*	-0.04*	-0.056*	-0.244	-0.044	0.08	-0.026	-0.204*
		148.5	0.132*	0.076*	-0.04*	-0.056*	-0.244	-0.044	0.08	-0.026	-0.104*
		148.6	0.132*	0.076*	-0.04*	-0.056*	-0.044	0.056	0.18	0.074	-0.104*
		148.7	0.132*	0.076*	-0.04*	-0.156*	-0.044	0.056	0.18	0.074	-0.204*
		148.8	0.132*	0.076*	-0.04*	-0.156*	-0.044	0.056	0.18	0.074	-0.204*
		148.9	0.132*	-0.024*	-0.04*	-0.156*	-0.044	0.056	0.18	0.074	-0.204*
		149	0.132*	-0.024*	-0.04*	-0.156*	-0.044	0.056	0.18	0.074	-0.204*
		149.1	0.132*	-0.024*	-0.14*	-0.256*	-0.044	0.056	0.08	-0.026	-0.204*
		149.2	0.032*	-0.124*	-0.14*	-0.256*	-0.144	0.056	0.08	-0.026	-0.204*
		149.3	0.032*	-0.124*	-0.14*	-0.256*	-0.144	0.056	-0.02	-0.026	-0.304*
		149.4	0.032*	-0.124*	-0.04*	-0.156*	-0.144	0.056	-0.02	-0.026	-0.204*
		149.5	0.032*	-0.124*	-0.04*	-0.156*	-0.144	0.056	0.08	-0.026	-0.204*
		149.6	0.032*	-0.124*	-0.04*	-0.156*	-0.144	0.056	0.08	-0.026	-0.204*
		149.7	0.132*	-0.124*	-0.04*	-0.056*	-0.144	0.056	0.08	-0.026	-0.204*
		149.8	0.132*	-0.124*	-0.04*	-0.056*	-0.144	0.056	0.08	-0.026	-0.204*
[truncated: 5,501 more rows]

## Sheet: Figure_3_C
			Rep 1	Rep 2	Rep 3	Rep 1	Rep 2	Rep 3	Rep 1	Rep 2	Rep 3
			KD WT/KD			kon/kon WT			koff WT/koff
		K417N	0.192094	0.19443	0.230488	0.515485	0.497391	0.621268	0.371512	0.389708	0.369867
		K417T	0.369029	0.290036	0.319164	0.660562	0.545122	0.630814	0.556958	0.530437	0.504415
		S477N	1.66531	1.69026	1.85893	0.86347	0.888001	0.951382	1.92276	1.89764	1.94797
		E484K	1.34169	1.44097	1.42761	1.68054	1.75824	1.69275	0.795939	0.817054	0.840798
		N501Y	11.1894	10.5419	10.2781	1.81263	1.77378	1.69719	6.15424	5.92509	6.03749
		K417N/E484K	0.274201	0.294917	0.344093	1.05117	1.12443	1.22877	0.260058	0.261483	0.279177
		K417T/E484K	0.447079	0.483644	0.538488	1.16106	1.22211	1.2876	0.383889	0.39454	0.416937
		E484K/N501Y	15.7181	13.3342	15.0501	2.71506	2.45643	2.59518	5.77159	5.41174	5.78157
		K417N/E484K/N501Y	3.79888	3.84166	3.55023	1.59063	1.7094	1.56066	2.38101	2.24053	2.2679
		K417T/E484K/N501Y	5.30709	5.75441	5.51014	1.65057	1.83261	1.72605	3.20552	3.13044	3.18262

## Sheet: Figure_3_D
		Mean	SD	Mean	SD	Mean	SD	Mean	SD	Mean	SD	Mean	SD	Mean	SD	Mean	SD	Mean	SD	Mean	SD
		K417N		K417T		E484K		N501Y		E484K/N501Y - Pred.		E484K/N501Y		K417N/E484K/N501Y - Pred.		K417N/E484K/N501Y		K417T/E484K/N501Y - Pred.		K417T/E484K/N501Y
		-0.96	0.06	-0.68	0.07	0.2	0.04	1.43	0.04	1.63	0.06	1.62	0.05	0.67	0.08	0.79	0.04	0.95	0.09	1.03	0.04
