# Supplementary material for: Effects of common mutations in the SARS-CoV-2 Spike RBD and its ligand, the human ACE2 receptor on binding affinity and kinetics
Source: eLife. 2021 Aug 26;10:e70658. doi: 10.7554/eLife.70658 (PMC8480977; doi:10.7554/eLife.70658)
Supplement: Figure 4—figure supplement 1—source data 1. [file elife-70658-fig4-figsupp1-data1.xlsx]

## Sheet: Figure_S6_A
		Time	3.9063	7.8125	15.6	31.3	62.5	125	250	500	3.91
		-50	0.026*	0.1*	0.076	0.152	0.398	0.382	-0.064	-0.208	0.35*
		-49.9	0.026*	0*	0.076	0.152	0.398	0.382	-0.064	-0.108	0.35*
		-49.8	0.026*	-0.1*	-0.024	0.152	0.398	0.382	-0.064	-0.008	0.35*
		-49.7	0.126*	0*	-0.024	0.152	0.398	0.382	-0.064	-0.008	0.35*
		-49.6	0.126*	0*	0.076	0.152	0.298	0.282	-0.064	-0.108	0.35*
		-49.5	0.226*	0*	0.076	0.152	0.398	0.282	-0.064	-0.108	0.35*
		-49.4	0.126*	-0.1*	0.076	0.152	0.398	0.282	-0.064	-0.208	0.25*
		-49.3	0.126*	0*	0.076	0.152	0.398	0.382	-0.064	-0.208	0.25*
		-49.2	0.126*	0*	0.076	0.152	0.398	0.382	-0.064	-0.108	0.25*
		-49.1	0.026*	0*	0.176	0.152	0.398	0.382	-0.064	-0.108	0.25*
		-49	0.026*	0*	0.076	0.052	0.498	0.282	-0.064	-0.108	0.35*
		-48.9	0.126*	0*	-0.024	0.052	0.498	0.382	-0.064	-0.108	0.25*
		-48.8	0.126*	0*	0.076	0.152	0.398	0.382	-0.064	-0.208	0.25*
		-48.7	0.126*	0.1*	0.176	0.152	0.398	0.382	-0.064	-0.108	0.25*
		-48.6	0.126*	0.1*	0.176	0.152	0.398	0.382	-0.064	-0.108	0.35*
		-48.5	0.126*	0.1*	0.176	0.252	0.298	0.282	-0.064	-0.108	0.25*
		-48.4	0.226*	0*	0.076	0.152	0.398	0.282	-0.064	-0.208	0.35*
		-48.3	0.226*	0.1*	0.076	0.152	0.398	0.282	-0.064	-0.208	0.25*
		-48.2	0.126*	0*	0.176	0.152	0.398	0.382	-0.164	-0.108	0.25*
		-48.1	0.126*	0*	0.176	0.152	0.398	0.482	-0.064	-0.108	0.25*
		-48	0.026*	0*	0.176	0.252	0.498	0.482	-0.064	-0.108	0.35*
		-47.9	0.126*	0*	0.176	0.252	0.398	0.282	-0.064	-0.108	0.35*
		-47.8	0.026*	-0.1*	0.176	0.252	0.398	0.282	-0.064	-0.108	0.25*
		-47.7	0.126*	0.1*	0.176	0.252	0.398	0.382	-0.064	-0.108	0.25*
		-47.6	0.126*	0.1*	0.176	0.352	0.498	0.382	0.036	-0.008	0.25*
		-47.5	0.126*	0.1*	0.076	0.252	0.498	0.382	0.036	-0.008	0.35*
		-47.4	0.126*	0.1*	0.076	0.252	0.398	0.282	-0.164	-0.108	0.35*
		-47.3	0.126*	-0.1*	0.076	0.152	0.398	0.282	-0.064	-0.208	0.35*
		-47.2	0.126*	0*	0.076	0.252	0.498	0.482	-0.064	-0.108	0.25*
		-47.1	0.026*	0*	0.176	0.252	0.498	0.482	-0.064	-0.108	0.25*
		-47	0.026*	0*	-0.024	0.152	0.498	0.382	-0.064	-0.108	0.25*
		-46.9	0.226*	0.1*	0.076	0.252	0.498	0.382	-0.164	-0.208	0.25*
		-46.8	0.126*	0.1*	0.076	0.352	0.498	0.282	-0.064	-0.108	0.35*
		-46.7	0.126*	0.1*	0.176	0.352	0.498	0.382	0.036	-0.108	0.25*
		-46.6	0.126*	0.1*	0.176	0.352	0.498	0.382	0.036	-0.108	0.25*
		-46.5	0.126*	0.1*	0.076	0.252	0.398	0.382	-0.064	-0.108	0.25*
		-46.4	0.226*	0.2*	0.076	0.352	0.298	0.382	-0.064	-0.108	0.25*
		-46.3	0.226*	0.2*	0.176	0.352	0.498	0.382	0.036	-0.108	0.25*
		-46.2	0.126*	0.1*	0.076	0.352	0.498	0.382	0.036	-0.108	0.15*
		-46.1	0.026*	0.1*	0.176	0.352	0.498	0.382	-0.064	-0.108	0.25*
		-46	0.026*	0.1*	0.076	0.252	0.498	0.382	-0.064	-0.008	0.25*
		-45.9	0.026*	0.1*	0.076	0.352	0.398	0.282	-0.064	-0.008	0.25*
		-45.8	0.226*	0.2*	0.076	0.352	0.398	0.382	-0.164	-0.108	0.25*
		-45.7	0.126*	0.2*	0.076	0.352	0.498	0.382	0.036	-0.008	0.25*
		-45.6	0.126*	0.2*	0.076	0.352	0.498	0.282	0.036	-0.008	0.15*
		-45.5	0.226*	0.2*	0.076	0.252	0.598	0.382	0.036	-0.008	0.15*
		-45.4	0.226*	0.2*	0.176	0.252	0.498	0.382	0.036	-0.008	0.15*
		-45.3	0.226*	0.2*	0.176	0.252	0.498	0.382	0.036	-0.008	0.15*
		-45.2	0.126*	0.2*	0.276	0.452	0.398	0.282	0.036	-0.108	0.15*
		-45.1	0.126*	0.3*	0.276	0.452	0.498	0.282	0.036	-0.108	0.25*
		-45	0.126*	0.3*	0.176	0.452	0.498	0.282	0.136	-0.108	0.25*
		-44.9	0.226*	0.3*	0.076	0.352	0.498	0.182	-0.064	-0.208	0.25*
		-44.8	0.226*	0.2*	0.076	0.352	0.498	0.182	0.036	-0.108	0.45*
		-44.7	0.226*	0.3*	0.076	0.352	0.598	0.182	0.136	-0.008	0.45*
		-44.6	0.326*	0.3*	0.076	0.252	0.598	0.182	0.236	-0.008	0.45*
		-44.5	0.326*	0.3*	0.076	0.252	0.398	0.082	0.236	0.092	0.45*
		-44.4	0.226*	0.2*	-0.024	0.152	0.498	0.282	0.136	-0.008	0.25*
		-44.3	0.226*	0.3*	-0.024	0.252	0.498	0.182	0.136	-0.208	0.15*
		-44.2	0.126*	0.2*	-0.124	0.052	0.398	0.082	-0.064	-0.208	0.25*
		-44.1	0.026*	0.1*	0.076	0.152	0.298	0.082	-0.164	-0.208	0.15*
		-44	0.226*	0.2*	0.076	0.052	0.298	0.082	-0.064	-0.208	-0.05*
		-43.9	0.126*	0.1*	0.076	0.052	0.198	0.082	-0.164	-0.208	0.05*
		-43.8	0.126*	0.1*	0.076	0.052	0.198	0.182	-0.264	-0.208	0.05*
		-43.7	0.026*	0*	-0.024	-0.048	0.098	0.082	-0.264	-0.108	-0.05*
		-43.6	0.026*	0.1*	0.076	-0.048	0.198	0.182	-0.164	0.092	0.05*
		-43.5	0.026*	0.1*	-0.024	-0.148	0.198	0.182	-0.064	-0.008	0.05*
		-43.4	0.126*	0.2*	-0.024	-0.048	0.198	0.182	-0.264	-0.008	0.15*
		-43.3	0.026*	0.1*	-0.024	-0.048	0.298	0.182	-0.164	-0.008	0.15*
		-43.2	0.026*	0.1*	-0.024	0.052	0.198	0.282	-0.164	-0.008	0.05*
		-43.1	0.126*	0*	0.076	0.152	0.398	0.182	-0.164	-0.008	0.15*
		-43	0.026*	0*	0.076	0.152	0.298	0.182	-0.064	-0.008	0.15*
		-42.9	0.026*	0.1*	0.076	0.252	0.298	0.182	-0.064	-0.008	0.15*
		-42.8	0.126*	0.2*	-0.024	0.052	0.298	0.182	-0.064	-0.008	0.05*
		-42.7	0.026*	0.1*	-0.024	0.052	0.298	0.182	0.036	0.192	0.05*
		-42.6	0.126*	0.1*	-0.024	0.052	0.398	0.182	0.036	0.192	0.05*
		-42.5	0.126*	0*	-0.024	0.152	0.398	0.282	0.036	0.192	0.05*
		-42.4	0.126*	0.1*	0.176	0.252	0.398	0.282	-0.064	0.092	0.15*
		-42.3	0.026*	0.1*	0.176	0.252	0.298	0.282	-0.064	0.092	0.05*
		-42.2	0.026*	0.1*	-0.024	0.152	0.298	0.282	0.036	-0.008	0.15*
		-42.1	0.126*	0.1*	-0.024	0.152	0.298	0.282	0.036	-0.008	0.15*
		-42	0.126*	0*	-0.024	0.252	0.298	0.282	0.036	0.092	0.25*
		-41.9	0.126*	0.1*	-0.024	0.252	0.398	0.282	0.036	0.092	0.25*
		-41.8	0.026*	0.1*	0.076	0.252	0.398	0.282	0.036	0.092	0.25*
		-41.7	0.026*	0*	0.076	0.152	0.398	0.282	0.036	0.192	0.15*
		-41.6	0.026*	0*	-0.024	0.152	0.398	0.282	0.136	0.192	0.25*
		-41.5	0.026*	0*	-0.024	0.152	0.398	0.282	0.036	0.192	0.15*
		-41.4	0.126*	0.1*	0.176	0.252	0.398	0.282	0.036	0.092	0.25*
		-41.3	0.026*	0.1*	0.076	0.252	0.398	0.282	0.036	0.092	0.25*
		-41.2	0.126*	0.1*	0.076	0.252	0.398	0.282	-0.064	-0.008	0.25*
		-41.1	0.126*	0*	0.076	0.252	0.298	0.282	-0.064	-0.008	0.25*
		-41	0.126*	0*	-0.024	0.152	0.298	0.282	-0.064	-0.008	0.15*
		-40.9	0.126*	0*	-0.024	0.152	0.298	0.282	0.136	0.192	0.15*
		-40.8	0.126*	0*	0.076	0.152	0.298	0.382	0.136	0.192	0.15*
		-40.7	0.126*	0*	0.076	0.252	0.298	0.282	0.036	0.092	0.25*
		-40.6	0.126*	0*	-0.024	0.152	0.298	0.282	0.036	0.092	0.25*
		-40.5	0.026*	0*	-0.024	0.152	0.298	0.182	0.036	-0.008	0.15*
		-40.4	0.026*	0*	-0.024	0.152	0.398	0.282	0.036	-0.008	0.15*
		-40.3	0.126*	0.1*	0.076	0.252	0.398	0.282	0.136	0.092	0.15*
		-40.2	0.126*	0.1*	0.076	0.352	0.198	0.182	0.036	0.092	0.15*
		-40.1	0.226*	0.1*	0.076	0.352	0.198	0.182	0.036	0.092	0.15*
		-40	0.126*	0*	0.076	0.352	0.198	0.282	-0.064	-0.008	0.25*
		-39.9	0.126*	0*	0.076	0.352	0.198	0.282	0.036	0.092	0.25*
		-39.8	0.126*	0*	-0.024	0.152	0.198	0.282	0.036	0.092	0.25*
		-39.7	0.026*	0*	-0.024	0.152	0.298	0.282	0.036	-0.008	0.25*
		-39.6	0.026*	0*	-0.024	0.152	0.298	0.282	0.036	0.092	0.25*
		-39.5	0.126*	0*	-0.024	0.152	0.198	0.282	0.136	0.092	0.25*
		-39.4	0.126*	0*	0.076	0.252	0.198	0.282	0.136	0.092	0.35*
		-39.3	0.126*	0.1*	0.076	0.152	0.198	0.282	0.136	0.092	0.35*
		-39.2	0.026*	0*	0.076	0.152	0.198	0.282	0.136	0.092	0.35*
		-39.1	0.026*	0*	0.176	0.252	0.198	0.282	0.136	0.092	0.25*
		-39	0.026*	0*	0.076	0.152	0.198	0.282	0.136	-0.008	0.25*
		-38.9	0.126*	0*	0.076	0.152	0.298	0.382	0.136	0.092	0.25*
		-38.8	0.226*	0*	0.076	0.252	0.298	0.382	0.136	0.092	0.15*
		-38.7	0.226*	0*	0.076	0.152	0.298	0.382	0.136	0.092	0.25*
		-38.6	0.226*	0.1*	0.176	0.152	0.298	0.382	0.236	0.192	0.35*
		-38.5	0.226*	0.1*	0.176	0.152	0.198	0.282	0.136	0.092	0.35*
		-38.4	0.126*	0.1*	0.076	0.152	0.198	0.282	0.136	0.092	0.25*
		-38.3	0.126*	0.1*	-0.024	0.052	0.298	0.382	0.136	0.192	0.25*
		-38.2	0.026*	0*	-0.024	0.052	0.198	0.382	0.136	0.192	0.25*
		-38.1	0.026*	0*	-0.024	0.052	0.198	0.282	0.136	0.192	0.25*
		-38	0.026*	0*	-0.024	0.052	0.198	0.282	0.236	0.192	0.25*
		-37.9	0.126*	0*	-0.024	0.152	0.298	0.282	0.236	0.192	0.25*
		-37.8	0.126*	0*	-0.024	0.052	0.198	0.182	0.236	0.092	0.25*
		-37.7	0.126*	0*	0.076	0.152	0.198	0.282	0.136	0.092	0.35*
		-37.6	0.126*	0*	0.076	0.152	0.198	0.282	0.136	0.092	0.35*
		-37.5	0.126*	0.1*	0.076	0.152	0.198	0.282	0.136	0.092	0.25*
		-37.4	0.126*	0.1*	0.176	0.152	0.198	0.282	0.236	0.092	0.25*
		-37.3	0.026*	0*	0.176	0.152	0.098	0.282	0.236	0.192	0.25*
		-37.2	-0.074*	0*	0.176	0.252	0.198	0.282	0.236	0.192	0.15*
		-37.1	-0.074*	-0.1*	-0.024	0.152	0.198	0.182	0.236	0.192	0.15*
		-37	0.026*	0*	-0.024	0.152	0.198	0.182	0.236	0.192	0.25*
		-36.9	0.026*	0*	0.076	0.252	0.198	0.182	0.136	0.192	0.25*
		-36.8	0.026*	0*	-0.024	0.152	0.098	0.082	0.136	0.192	0.25*
		-36.7	0.126*	0*	-0.024	0.052	0.098	0.082	0.136	0.092	0.25*
		-36.6	0.126*	0.1*	-0.024	0.052	0.198	0.082	0.136	0.092	0.25*
		-36.5	0.126*	0.1*	-0.024	0.052	0.198	0.082	0.136	0.092	0.25*
		-36.4	0.126*	0.1*	0.076	0.052	0.198	0.082	0.136	-0.008	0.25*
		-36.3	0.126*	0.1*	0.076	0.052	0.198	0.082	0.136	-0.008	0.25*
		-36.2	0.026*	0*	0.076	0.052	0.098	0.182	0.136	0.092	0.25*
		-36.1	-0.074*	0*	0.076	0.152	0.098	0.182	0.136	0.092	0.25*
		-36	-0.074*	0*	0.076	0.152	0.098	0.182	0.136	0.092	0.15*
		-35.9	-0.074*	0*	-0.024	0.152	-0.002	-0.018	0.136	0.092	0.15*
		-35.8	-0.074*	0*	-0.124	0.052	-0.002	-0.018	0.136	0.092	0.15*
		-35.7	0.026*	0.1*	-0.124	0.052	-0.002	-0.018	0.136	0.092	0.25*
		-35.6	0.026*	0.1*	-0.024	0.152	0.098	-0.018	0.136	0.092	0.25*
		-35.5	0.026*	0.1*	0.076	0.152	0.098	-0.018	0.136	0.092	0.25*
		-35.4	0.126*	0*	0.076	0.052	0.198	0.082	0.136	0.092	0.25*
		-35.3	0.026*	-0.1*	0.076	0.052	0.198	0.082	0.136	0.092	0.25*
		-35.2	0.026*	0*	0.076	0.052	0.198	-0.018	0.236	0.192	0.15*
		-35.1	0.026*	0*	0.076	0.152	0.198	-0.018	0.136	0.092	0.15*
		-35	0.026*	0*	0.076	0.152	0.198	-0.018	0.136	0.092	0.15*
		-34.9	0.026*	0*	0.076	0.152	0.198	-0.018	0.136	0.092	0.15*
		-34.8	0.026*	0*	0.076	0.152	0.198	-0.018	0.236	0.092	0.15*
		-34.7	0.026*	0*	0.176	0.252	0.198	-0.018	0.236	0.092	0.05*
		-34.6	0.026*	0*	0.276	0.252	0.198	-0.118	0.236	0.092	0.15*
		-34.5	-0.074*	-0.1*	0.276	0.252	0.198	-0.118	0.236	0.092	0.15*
		-34.4	-0.074*	-0.1*	0.276	0.352	0.198	-0.018	0.236	0.092	0.15*
		-34.3	-0.074*	0*	0.176	0.152	0.098	-0.018	0.236	0.092	0.15*
		-34.2	0.026*	0.1*	0.176	0.152	0.198	-0.018	0.136	0.092	0.15*
		-34.1	0.026*	0.1*	0.176	0.152	0.198	-0.018	0.036	0.092	0.05*
		-34	0.026*	0.1*	0.176	0.152	0.198	-0.018	0.036	0.092	0.05*
		-33.9	0.126*	0*	0.076	0.152	0.198	-0.018	0.036	-0.008	0.05*
		-33.8	0.126*	0*	0.076	0.252	0.198	-0.118	0.136	-0.008	-0.05*
		-33.7	0.126*	0*	0.076	0.252	0.198	-0.018	0.136	-0.008	0.05*
		-33.6	0.026*	-0.1*	0.076	0.152	0.198	-0.018	0.236	0.092	0.05*
		-33.5	0.026*	-0.1*	0.076	0.152	0.298	-0.018	0.236	0.192	0.05*
		-33.4	-0.074*	-0.1*	0.076	0.152	0.298	-0.018	0.136	0.092	0.15*
		-33.3	0.026*	0.1*	0.076	0.152	0.298	-0.018	0.136	0.092	0.15*
		-33.2	0.026*	0.1*	0.076	0.252	0.198	-0.018	0.136	0.092	0.05*
		-33.1	0.126*	0.1*	0.176	0.352	0.198	0.082	0.236	-0.008	0.05*
		-33	0.126*	0.1*	0.076	0.252	0.098	-0.018	0.236	-0.008	0.15*
		-32.9	0.026*	-0.1*	0.176	0.152	0.098	-0.018	0.136	-0.008	0.15*
		-32.8	0.026*	-0.1*	0.176	0.152	0.198	-0.018	0.136	-0.008	0.05*
		-32.7	0.026*	-0.1*	0.176	0.152	0.198	-0.018	0.136	-0.008	0.05*
		-32.6	0.226*	0*	0.176	0.152	0.298	-0.018	0.136	0.092	0.05*
		-32.5	0.226*	0*	0.176	0.152	0.298	0.082	0.136	0.092	0.05*
		-32.4	0.226*	0.1*	-0.024	0.052	0.298	0.082	0.136	0.092	0.25*
		-32.3	0.226*	0.1*	-0.024	0.052	0.198	-0.018	0.136	0.092	0.25*
		-32.2	0.126*	0.1*	0.076	0.252	0.198	-0.018	0.136	0.092	0.15*
		-32.1	0.026*	0*	0.076	0.252	0.198	-0.018	0.236	0.092	0.15*
		-32	0.026*	0*	0.076	0.252	0.198	-0.018	0.136	0.092	0.15*
		-31.9	0.026*	0*	0.176	0.252	0.298	0.182	0.236	0.192	0.05*
		-31.8	0.026*	0*	0.076	0.152	0.398	0.182	0.236	0.092	0.05*
		-31.7	0.026*	0*	0.076	0.152	0.298	0.082	0.236	0.092	0.05*
		-31.6	0.126*	0.2*	0.076	0.152	0.298	0.082	0.236	0.092	0.15*
		-31.5	0.226*	0.1*	0.076	0.152	0.198	0.082	0.236	0.092	0.15*
		-31.4	0.226*	0.1*	0.076	0.152	0.198	-0.018	0.136	0.092	0.15*
		-31.3	0.126*	0*	0.076	0.252	0.198	-0.018	0.236	0.092	0.15*
		-31.2	0.126*	0*	-0.024	0.152	0.298	0.182	0.236	0.092	0.15*
		-31.1	0.126*	0*	0.076	0.152	0.298	0.182	0.136	-0.008	0.15*
		-31	0.126*	0*	0.176	0.152	0.298	0.182	0.136	0.092	0.15*
		-30.9	0.126*	0*	0.176	0.152	0.398	0.182	0.136	0.092	0.25*
		-30.8	0.026*	0*	0.176	0.152	0.398	0.182	0.236	0.092	0.25*
		-30.7	0.026*	0*	0.176	0.152	0.298	0.082	0.236	0.092	0.25*
		-30.6	0.226*	0.1*	0.076	0.152	0.298	0.082	0.236	0.092	0.15*
		-30.5	0.226*	0.1*	0.076	0.152	0.298	0.082	0.336	0.092	0.05*
		-30.4	0.226*	0.1*	-0.024	0.152	0.198	0.082	0.236	-0.008	0.05*
		-30.3	0.226*	0*	-0.024	0.152	0.198	0.082	0.236	0.092	0.05*
		-30.2	0.226*	0*	-0.024	0.152	0.198	0.082	0.136	0.092	0.05*
		-30.1	0.226*	0*	0.076	0.152	0.298	0.082	0.236	0.192	0.15*
		-30	0.126*	0*	0.176	0.152	0.298	0.082	0.236	0.192	0.25*
		-29.9	0.126*	0*	0.176	0.152	0.298	0.082	0.236	0.192	0.25*
		-29.8	0.026*	0*	0.176	0.152	0.298	0.082	0.136	0.092	0.25*
		-29.7	0.126*	0*	0.176	0.152	0.298	0.082	0.236	0.192	0.15*
		-29.6	0.126*	0*	0.076	0.052	0.298	0.082	0.236	0.192	0.15*
		-29.5	0.126*	0.1*	0.076	0.152	0.298	0.082	0.236	0.092	0.15*
		-29.4	0.126*	0.1*	0.076	0.152	0.298	0.182	0.236	0.092	0.15*
		-29.3	0.126*	0.1*	0.076	0.152	0.298	0.182	0.336	0.192	0.15*
		-29.2	0.126*	0*	0.076	0.152	0.298	0.182	0.336	0.192	0.15*
		-29.1	0.126*	0*	-0.024	0.152	0.298	0.182	0.236	0.092	0.15*
		-29	0.126*	0*	0.076	0.252	0.298	0.182	0.336	0.192	0.15*
		-28.9	0.126*	0*	0.176	0.352	0.298	0.082	0.236	0.192	0.15*
		-28.8	0.126*	0.1*	0.076	0.252	0.398	0.082	0.236	0.192	0.15*
		-28.7	0.126*	0.1*	0.076	0.252	0.298	-0.018	0.136	0.092	0.15*
		-28.6	0.126*	0.1*	0.076	0.152	0.298	0.082	0.236	0.192	0.25*
		-28.5	0.226*	0.1*	0.076	0.152	0.398	0.182	0.236	0.292	0.25*
		-28.4	0.226*	0.1*	0.076	0.252	0.398	0.182	0.336	0.292	0.15*
		-28.3	0.126*	0.1*	0.076	0.252	0.398	0.182	0.336	0.292	0.25*
		-28.2	0.126*	0.1*	-0.024	0.152	0.298	0.182	0.236	0.192	0.25*
		-28.1	0.126*	0.1*	-0.024	0.152	0.398	0.182	0.236	0.192	0.25*
		-28	0.126*	0.1*	-0.024	0.152	0.398	0.182	0.236	0.192	0.15*
		-27.9	0.126*	0*	-0.024	0.152	0.398	0.282	0.236	0.192	0.15*
		-27.8	0.126*	0*	-0.024	0.152	0.398	0.282	0.236	0.092	0.25*
		-27.7	0.126*	0.1*	0.076	0.352	0.398	0.182	0.236	0.092	0.25*
		-27.6	0.226*	0.2*	0.076	0.352	0.498	0.182	0.236	0.192	0.25*
		-27.5	0.126*	0.1*	0.176	0.352	0.398	0.182	0.236	0.192	0.25*
		-27.4	0.126*	0.1*	0.076	0.352	0.298	0.182	0.136	0.092	0.25*
		-27.3	0.126*	0.1*	0.076	0.352	0.298	0.182	0.236	0.192	0.25*
		-27.2	0.126*	0.2*	0.076	0.352	0.298	0.182	0.236	0.192	0.25*
		-27.1	0.226*	0.2*	0.076	0.352	0.298	0.282	0.236	0.192	0.35*
		-27	0.226*	0.2*	0.176	0.252	0.398	0.282	0.236	0.192	0.35*
		-26.9	0.226*	0.1*	0.076	0.352	0.398	0.282	0.236	0.192	0.25*
		-26.8	0.126*	0.1*	-0.024	0.252	0.298	0.182	0.136	0.192	0.25*
		-26.7	0.126*	0.1*	0.076	0.352	0.298	0.082	0.236	0.192	0.35*
		-26.6	0.226*	0.1*	0.076	0.352	0.298	0.182	0.236	0.192	0.25*
		-26.5	0.326*	0.2*	0.176	0.352	0.398	0.282	0.236	0.192	0.25*
		-26.4	0.326*	0.2*	0.076	0.252	0.398	0.282	0.236	0.192	0.25*
		-26.3	0.326*	0.2*	0.076	0.352	0.398	0.282	0.236	0.192	0.25*
		-26.2	0.226*	0.2*	0.076	0.352	0.398	0.282	0.336	0.192	0.25*
		-26.1	0.226*	0.2*	0.076	0.352	0.298	0.282	0.336	0.192	0.25*
		-26	0.226*	0.2*	0.076	0.352	0.398	0.282	0.336	0.192	0.35*
		-25.9	0.226*	0.2*	-0.024	0.352	0.398	0.282	0.336	0.192	0.35*
		-25.8	0.126*	0.2*	-0.024	0.352	0.398	0.282	0.236	0.192	0.25*
		-25.7	0.126*	0.2*	-0.024	0.352	0.398	0.282	0.136	0.092	0.15*
		-25.6	0.126*	0.2*	0.076	0.352	0.298	0.182	0.136	0.192	0.15*
		-25.5	0.226*	0.2*	0.076	0.252	0.398	0.282	0.236	0.192	0.15*
		-25.4	0.226*	0.2*	0.076	0.352	0.498	0.282	0.236	0.192	0.15*
		-25.3	0.126*	0.1*	0.076	0.352	0.398	0.282	0.236	0.192	0.15*
		-25.2	0.126*	0.2*	0.076	0.352	0.398	0.282	0.236	0.192	0.15*
		-25.1	0.126*	0.2*	0.076	0.352	0.298	0.182	0.136	0.092	0.25*
		-25	0.226*	0.1*	0.176	0.452	0.398	0.282	0.136	0.092	0.15*
		-24.9	0.326*	0.2*	0.076	0.352	0.398	0.282	0.236	0.192	0.15*
		-24.8	0.226*	0.1*	0.076	0.352	0.398	0.282	0.236	0.192	0.25*
		-24.7	0.226*	0.1*	0.076	0.352	0.398	0.282	0.336	0.292	0.25*
		-24.6	0.226*	0.2*	0.076	0.352	0.298	0.182	0.236	0.192	0.25*
		-24.5	0.026*	0.1*	0.076	0.352	0.298	0.182	0.236	0.092	0.15*
		-24.4	0.126*	0.1*	0.076	0.252	0.298	0.182	0.236	0.092	0.15*
		-24.3	0.126*	0.1*	-0.024	0.252	0.398	0.282	0.236	0.092	0.15*
		-24.2	0.126*	0.1*	-0.024	0.352	0.298	0.182	0.136	-0.008	0.35*
		-24.1	0.126*	0.1*	0.076	0.452	0.298	0.182	0.136	-0.008	0.15*
		-24	0.126*	0.1*	-0.024	0.352	0.298	0.182	0.136	-0.008	0.15*
		-23.9	0.126*	0.1*	-0.024	0.352	0.298	0.182	0.136	-0.008	0.15*
		-23.8	0.126*	0.2*	-0.024	0.352	0.298	0.182	0.036	-0.008	0.15*
		-23.7	0.126*	0.2*	-0.024	0.352	0.198	0.082	0.036	-0.008	0.15*
		-23.6	0.126*	0.2*	0.076	0.352	0.198	0.082	0.036	-0.008	0.05*
		-23.5	0.226*	0.2*	0.076	0.252	0.198	0.082	0.036	-0.008	0.05*
		-23.4	0.126*	0.1*	0.076	0.252	0.198	0.082	0.036	-0.008	0.05*
		-23.3	0.126*	0.1*	0.076	0.252	0.198	0.082	-0.064	-0.108	0.05*
		-23.2	0.126*	0.1*	-0.024	0.152	0.098	-0.018	-0.064	-0.108	0.15*
		-23.1	0.126*	0*	-0.024	0.152	0.098	-0.018	0.036	-0.108	0.15*
		-23	0.126*	0*	-0.024	0.152	0.198	0.082	0.136	0.092	0.15*
		-22.9	0.026*	0*	0.076	0.252	0.298	0.182	0.136	-0.008	0.15*
		-22.8	0.026*	0*	0.076	0.252	0.298	0.182	0.136	-0.008	0.15*
		-22.7	0.026*	0*	-0.024	0.352	0.298	0.082	0.136	-0.008	0.05*
		-22.6	-0.074*	-0.1*	-0.024	0.352	0.298	0.082	0.136	-0.008	0.15*
		-22.5	-0.074*	-0.1*	0.076	0.352	0.198	-0.018	0.036	-0.008	0.25*
		-22.4	-0.074*	-0.1*	-0.024	0.252	0.098	-0.018	-0.064	-0.108	0.25*
		-22.3	-0.074*	0*	-0.024	0.252	0.098	-0.018	0.036	-0.108	0.25*
		-22.2	0.126*	0.1*	-0.024	0.252	0.098	-0.018	0.036	-0.108	0.25*
		-22.1	0.126*	0.1*	-0.024	0.252	0.098	-0.018	0.036	-0.008	0.25*
		-22	0.126*	0.1*	-0.024	0.152	0.098	-0.018	0.036	-0.008	0.25*
		-21.9	0.126*	0.1*	-0.024	0.152	0.098	-0.018	0.036	-0.008	0.25*
		-21.8	0.126*	0.1*	-0.024	0.152	0.098	0.082	0.036	-0.008	0.15*
		-21.7	0.126*	0.1*	-0.024	0.152	0.098	0.082	0.036	-0.008	0.15*
		-21.6	0.126*	0.1*	-0.024	0.252	-0.002	-0.018	0.036	-0.008	0.15*
		-21.5	0.126*	0.1*	0.076	0.252	-0.002	-0.018	0.136	-0.008	0.25*
		-21.4	0.126*	0.1*	0.076	0.252	-0.002	-0.018	0.136	-0.008	0.25*
		-21.3	-0.074*	0*	0.076	0.252	0.098	0.082	0.136	-0.008	0.25*
		-21.2	-0.074*	0*	0.076	0.352	0.198	0.082	0.236	0.092	0.25*
		-21.1	0.026*	0.1*	0.076	0.352	0.198	0.082	0.236	0.092	0.25*
		-21	0.026*	0.1*	0.076	0.352	0.198	0.082	0.236	0.192	0.15*
		-20.9	0.026*	0.1*	0.076	0.352	0.198	0.082	0.236	0.192	0.15*
		-20.8	0.026*	0.1*	0.076	0.352	-0.002	-0.018	0.236	0.192	0.05*
		-20.7	0.026*	0.1*	-0.024	0.252	-0.002	-0.018	0.136	0.092	0.05*
		-20.6	0.026*	0.1*	-0.024	0.352	-0.002	-0.018	0.136	0.092	0.15*
		-20.5	0.026*	0.1*	-0.024	0.352	-0.002	-0.018	0.136	0.092	0.25*
		-20.4	0.026*	0.2*	-0.024	0.352	-0.002	-0.018	0.236	0.092	0.25*
		-20.3	0.126*	0.1*	-0.024	0.352	-0.002	-0.018	0.236	0.092	0.25*
		-20.2	0.026*	0*	-0.024	0.352	-0.002	-0.018	0.236	0.092	0.25*
		-20.1	0.026*	0*	0.076	0.352	-0.002	0.082	0.236	0.092	0.25*
		-20	0.026*	0*	0.076	0.352	-0.002	0.082	0.236	0.092	0.25*
		-19.9	0.026*	0*	0.076	0.352	-0.002	0.082	0.236	0.092	0.25*
		-19.8	0.026*	0*	0.076	0.352	-0.002	0.082	0.236	0.092	0.25*
		-19.7	0.026*	0*	0.076	0.352	-0.002	0.082	0.136	0.092	0.25*
		-19.6	0.026*	0*	0.076	0.352	-0.002	0.082	0.136	0.092	0.35*
		-19.5	0.126*	0*	0.076	0.352	-0.002	0.082	0.136	0.092	0.35*
		-19.4	0.126*	0.1*	0.076	0.352	-0.002	0.082	0.136	0.092	0.35*
		-19.3	0.126*	0.1*	-0.024	0.152	-0.002	0.082	0.136	0.092	0.35*
		-19.2	0.026*	0.1*	-0.024	0.152	-0.002	-0.018	0.136	0.092	0.25*
		-19.1	0.026*	0.1*	-0.024	0.152	-0.002	-0.018	0.136	0.092	0.25*
		-19	0.026*	0.1*	0.076	0.252	-0.102	-0.118	0.136	0.092	0.25*
		-18.9	0.026*	0.1*	0.076	0.252	-0.102	-0.118	0.136	0.092	0.25*
		-18.8	0.026*	0.1*	0.076	0.252	-0.102	-0.118	0.236	0.192	0.25*
		-18.7	0.026*	0.1*	0.076	0.252	-0.002	-0.018	0.236	0.192	0.25*
		-18.6	0.026*	0.1*	0.076	0.252	-0.002	-0.018	0.136	0.192	0.25*
		-18.5	-0.074*	0*	0.076	0.252	-0.002	-0.018	0.236	0.192	0.25*
		-18.4	-0.074*	0*	0.076	0.252	-0.002	-0.018	0.136	0.092	0.25*
		-18.3	-0.074*	0*	0.076	0.252	-0.002	-0.018	0.136	0.092	0.25*
		-18.2	-0.074*	0*	0.076	0.252	-0.002	-0.018	0.136	0.092	0.25*
		-18.1	-0.074*	-0.1*	0.076	0.252	-0.002	-0.018	0.036	0.092	0.15*
		-18	-0.074*	-0.1*	0.076	0.252	-0.002	-0.018	0.036	0.092	0.15*
		-17.9	-0.074*	-0.1*	0.076	0.252	-0.002	-0.018	0.036	0.092	0.15*
		-17.8	-0.074*	-0.1*	0.076	0.252	-0.002	-0.018	0.036	0.092	0.15*
		-17.7	-0.074*	-0.1*	0.076	0.152	-0.002	-0.018	0.036	0.092	0.15*
		-17.6	-0.074*	-0.1*	0.076	0.152	-0.002	-0.118	0.036	0.092	0.25*
		-17.5	-0.074*	-0.1*	-0.024	0.052	-0.002	-0.118	0.036	0.092	0.25*
		-17.4	-0.074*	-0.1*	-0.024	0.052	-0.002	-0.118	0.036	-0.008	0.25*
		-17.3	-0.074*	-0.1*	-0.024	-0.048	-0.002	-0.118	0.036	-0.108	0.25*
		-17.2	-0.074*	-0.1*	-0.024	-0.048	-0.002	-0.118	-0.064	-0.008	0.25*
		-17.1	-0.074*	-0.1*	-0.024	-0.048	-0.002	-0.118	-0.064	-0.008	0.25*
		-17	0.026*	0*	-0.024	-0.048	-0.002	-0.118	-0.064	-0.108	0.25*
		-16.9	0.126*	0.1*	-0.024	-0.048	-0.002	-0.118	-0.064	-0.108	0.15*
		-16.8	0.126*	0.1*	-0.024	-0.048	-0.002	-0.118	-0.064	-0.108	0.15*
		-16.7	0.026*	0*	-0.024	-0.048	0.098	-0.018	-0.064	-0.108	0.15*
		-16.6	0.126*	0.1*	-0.024	-0.048	0.098	-0.018	-0.064	-0.108	0.15*
		-16.5	0.026*	0.1*	-0.024	-0.048	-0.002	-0.018	-0.064	-0.108	0.15*
		-16.4	0.026*	0.1*	0.076	-0.048	-0.002	-0.018	-0.064	-0.108	0.15*
		-16.3	0.026*	0*	-0.024	-0.148	-0.002	-0.018	-0.064	-0.108	0.15*
		-16.2	0.026*	0*	0.076	-0.048	-0.002	-0.018	-0.064	-0.108	0.15*
		-16.1	0.026*	0*	0.076	-0.048	-0.002	-0.018	-0.164	-0.108	0.15*
		-16	0.026*	0*	0.076	-0.048	-0.002	-0.118	-0.064	-0.008	0.15*
		-15.9	0.026*	-0.1*	0.076	-0.048	-0.002	-0.118	-0.064	-0.008	0.15*
		-15.8	0.026*	-0.1*	-0.024	-0.048	-0.002	-0.118	-0.064	-0.008	0.15*
		-15.7	0.026*	-0.1*	-0.024	-0.048	-0.002	-0.118	-0.064	-0.008	0.15*
		-15.6	0.026*	-0.1*	-0.024	-0.048	-0.002	-0.118	-0.064	-0.108	0.15*
		-15.5	0.026*	-0.1*	-0.024	-0.048	-0.002	-0.118	-0.064	-0.108	0.15*
		-15.4	0.026*	-0.1*	-0.024	-0.048	-0.002	-0.118	-0.064	-0.108	0.15*
		-15.3	0.026*	-0.1*	-0.024	-0.048	-0.002	-0.118	-0.064	-0.108	0.15*
		-15.2	0.026*	-0.1*	-0.024	-0.048	-0.002	-0.118	-0.064	-0.108	0.15*
		-15.1	0.126*	-0.1*	-0.024	-0.048	-0.102	-0.118	-0.064	-0.108	0.15*
		-15	0.126*	-0.1*	-0.024	-0.048	-0.102	-0.118	-0.064	-0.108	0.05*
		-14.9	0.126*	-0.1*	-0.024	-0.148	-0.102	-0.118	0.036	-0.008	0.05*
		-14.8	0.226*	0*	-0.024	-0.148	-0.002	-0.018	0.036	-0.008	0.05*
		-14.7	0.226*	0*	-0.024	-0.148	-0.002	-0.018	-0.064	-0.008	0.05*
		-14.6	0.226*	0*	-0.024	-0.148	-0.002	-0.018	-0.064	-0.008	0.05*
		-14.5	0.226*	0*	-0.024	-0.048	-0.002	-0.018	-0.064	-0.008	0.05*
		-14.4	0.026*	-0.1*	-0.024	-0.048	-0.002	-0.018	-0.064	-0.008	0.05*
		-14.3	0.126*	-0.1*	-0.024	-0.048	-0.002	-0.018	-0.064	-0.008	-0.05*
		-14.2	0.126*	-0.1*	-0.024	-0.048	-0.002	-0.018	-0.064	-0.008	-0.05*
		-14.1	0.126*	-0.1*	-0.024	-0.048	-0.002	-0.018	-0.064	-0.008	0.05*
		-14	0.126*	-0.1*	0.076	0.052	-0.002	-0.018	-0.064	-0.008	0.05*
		-13.9	0.126*	-0.1*	-0.024	-0.048	-0.002	-0.018	-0.064	-0.008	0.05*
		-13.8	0.126*	-0.1*	0.076	0.052	-0.002	-0.018	-0.064	-0.008	0.05*
		-13.7	0.126*	-0.1*	0.076	0.052	-0.102	-0.118	-0.064	-0.008	0.05*
		-13.6	0.126*	-0.1*	0.076	0.052	-0.102	-0.118	-0.064	-0.008	0.05*
		-13.5	0.126*	-0.1*	0.076	0.052	-0.102	-0.118	-0.064	-0.008	0.05*
		-13.4	0.126*	-0.1*	0.076	-0.048	-0.102	-0.118	-0.064	-0.008	0.05*
		-13.3	0.126*	-0.1*	0.176	-0.048	-0.102	-0.118	-0.164	-0.008	0.05*
		-13.2	0.026*	-0.1*	0.076	-0.048	-0.102	-0.118	-0.164	-0.008	0.05*
		-13.1	0.026*	-0.1*	0.076	-0.048	-0.102	-0.118	-0.164	-0.008	-0.05*
		-13	0.026*	-0.1*	0.076	-0.048	-0.102	-0.118	-0.164	-0.008	-0.05*
		-12.9	0.126*	0*	-0.024	-0.148	-0.102	-0.118	-0.164	-0.008	-0.05*
		-12.8	0.126*	0*	-0.024	-0.048	-0.102	-0.018	-0.164	-0.108	-0.05*
		-12.7	0.126*	0*	0.076	-0.048	-0.002	0.082	-0.164	-0.108	-0.05*
		-12.6	0.126*	0*	-0.024	-0.048	-0.002	0.082	-0.164	-0.108	-0.05*
		-12.5	0.126*	0*	-0.024	-0.048	-0.002	0.082	-0.164	-0.108	-0.05*
		-12.4	0.126*	0*	-0.024	-0.048	-0.002	0.082	-0.164	-0.108	0.05*
		-12.3	0.226*	0.1*	-0.024	-0.048	-0.002	-0.018	-0.064	-0.008	0.05*
		-12.2	0.226*	0.1*	-0.024	-0.048	-0.002	-0.018	-0.064	-0.008	0.05*
		-12.1	0.226*	0*	-0.024	-0.148	-0.002	-0.018	-0.064	-0.008	0.05*
		-12	0.226*	0*	-0.024	-0.148	-0.002	-0.018	-0.064	-0.008	0.05*
		-11.9	0.226*	0*	-0.024	-0.148	-0.002	-0.018	-0.064	-0.008	0.05*
		-11.8	0.226*	0*	-0.024	-0.048	-0.002	-0.018	-0.064	-0.008	0.05*
		-11.7	0.226*	0*	-0.024	-0.048	-0.002	-0.018	-0.064	-0.008	0.05*
		-11.6	0.226*	0*	-0.024	-0.048	-0.002	-0.018	-0.064	-0.008	0.05*
		-11.5	0.226*	0*	-0.024	-0.048	-0.002	-0.018	-0.064	-0.008	-0.05*
		-11.4	0.126*	0*	0.076	-0.048	-0.002	-0.018	-0.064	-0.008	-0.05*
		-11.3	0.026*	0*	-0.024	-0.048	-0.002	-0.018	-0.064	-0.008	-0.05*
		-11.2	0.026*	0*	0.076	-0.048	-0.002	-0.018	-0.164	-0.108	-0.05*
		-11.1	0.026*	0*	0.076	-0.048	-0.002	-0.018	-0.164	-0.108	-0.05*
		-11	0.026*	0*	-0.024	-0.048	-0.002	0.082	-0.164	-0.108	-0.05*
		-10.9	0.026*	0*	0.076	-0.048	-0.002	0.082	-0.064	-0.008	-0.05*
		-10.8	0.026*	0*	-0.024	-0.048	-0.002	0.082	-0.064	-0.008	-0.05*
		-10.7	0.026*	0*	-0.024	-0.048	-0.002	0.082	-0.164	-0.008	0.05*
		-10.6	0.026*	0*	-0.024	-0.048	-0.002	0.082	-0.164	-0.108	0.05*
		-10.5	0.026*	0*	-0.024	-0.048	-0.002	0.082	-0.164	-0.108	-0.05*
		-10.4	0.026*	0*	-0.024	-0.148	-0.002	0.082	-0.164	-0.108	-0.05*
		-10.3	0.026*	0*	-0.024	-0.148	-0.002	0.082	-0.164	-0.108	-0.05*
		-10.2	0.026*	0*	-0.024	-0.148	-0.002	0.082	-0.064	-0.108	-0.05*
		-10.1	0.026*	0.1*	0.076	-0.048	-0.002	-0.018	-0.064	-0.108	-0.05*
		-10	0.026*	0.1*	0.076	-0.048	-0.002	-0.018	-0.064	-0.108	-0.05*
		-9.9	0.026*	0.1*	0.076	-0.048	-0.002	-0.018	-0.064	-0.108	-0.05*
		-9.8	0.026*	0.1*	0.076	-0.048	-0.002	-0.018	-0.064	-0.108	-0.05*
		-9.7	0.026*	0.1*	0.076	-0.048	-0.002	-0.018	-0.064	-0.108	-0.05*
		-9.6	0.026*	0.1*	0.076	-0.048	-0.002	-0.018	-0.064	-0.108	-0.05*
		-9.5	0.026*	0*	0.076	-0.048	-0.002	-0.018	0.036	-0.008	-0.05*
		-9.4	0.026*	0*	0.076	-0.048	-0.002	-0.018	0.036	-0.008	-0.05*
		-9.3	0.026*	0*	0.076	-0.048	-0.002	-0.018	0.036	-0.008	-0.05*
		-9.2	0.026*	0*	0.076	-0.048	-0.002	-0.018	0.036	-0.008	-0.05*
		-9.1	0.026*	0*	0.076	-0.048	-0.002	-0.018	-0.064	-0.008	0.05*
		-9	0.026*	0*	0.076	-0.048	-0.002	-0.018	-0.064	-0.008	0.05*
		-8.9	0.026*	0*	0.076	-0.048	-0.002	-0.018	-0.064	-0.008	-0.05*
		-8.8	0.126*	0.1*	-0.024	-0.048	-0.102	-0.018	-0.064	-0.008	-0.05*
		-8.7	0.126*	0.1*	-0.024	-0.048	-0.102	-0.018	-0.064	-0.008	0.05*
		-8.6	0.026*	0.1*	-0.024	-0.048	-0.102	-0.018	-0.064	-0.008	0.05*
		-8.5	0.026*	0.1*	-0.024	-0.048	-0.102	-0.118	-0.064	-0.008	0.05*
		-8.4	0.026*	0.1*	-0.024	-0.048	-0.102	-0.118	-0.064	-0.008	0.05*
		-8.3	0.026*	0.1*	0.076	0.052	-0.102	-0.118	-0.064	-0.008	0.05*
		-8.2	0.026*	0.1*	0.076	0.052	-0.102	-0.118	-0.064	-0.008	0.05*
		-8.1	0.026*	0.1*	0.076	0.052	-0.102	-0.118	-0.064	-0.008	0.05*
		-8	0.026*	0.1*	0.076	0.052	-0.102	-0.118	-0.064	-0.008	0.05*
		-7.9	-0.074*	0*	0.076	0.052	-0.002	-0.018	-0.064	-0.008	0.05*
		-7.8	-0.074*	-0.1*	0.076	0.052	-0.002	-0.018	-0.064	-0.008	0.05*
		-7.7	-0.074*	-0.1*	0.076	0.052	-0.002	-0.018	-0.064	-0.008	0.05*
		-7.6	-0.074*	-0.1*	-0.024	0.052	-0.002	-0.018	-0.064	-0.008	0.05*
		-7.5	-0.074*	-0.1*	-0.024	0.052	-0.002	-0.018	-0.064	-0.008	-0.05*
		-7.4	-0.074*	-0.1*	-0.024	0.052	-0.002	-0.018	-0.064	-0.008	-0.05*
		-7.3	-0.074*	-0.1*	-0.024	0.052	0.098	-0.018	0.036	0.092	-0.05*
		-7.2	-0.074*	-0.1*	-0.024	0.052	-0.002	-0.018	0.036	0.092	-0.05*
		-7.1	-0.074*	-0.1*	-0.024	0.052	-0.002	-0.018	0.036	0.092	-0.05*
		-7	-0.074*	-0.1*	-0.024	0.052	-0.002	-0.018	0.036	0.092	-0.05*
		-6.9	-0.074*	-0.1*	-0.024	0.052	-0.002	-0.018	0.036	-0.008	-0.05*
		-6.8	-0.074*	-0.1*	0.076	0.152	-0.002	-0.018	0.036	0.092	-0.05*
		-6.7	-0.074*	-0.1*	0.076	0.152	-0.002	-0.018	0.036	0.092	-0.05*
		-6.6	-0.074*	-0.1*	-0.024	-0.048	-0.002	-0.018	0.036	0.092	-0.05*
		-6.5	-0.074*	-0.1*	-0.024	0.052	-0.002	-0.018	0.036	0.092	-0.05*
		-6.4	0.026*	0*	-0.024	-0.048	-0.002	-0.018	0.036	-0.008	-0.05*
		-6.3	0.026*	0*	-0.024	-0.048	0.098	-0.018	0.036	-0.008	-0.05*
		-6.2	0.026*	0*	-0.024	-0.048	0.098	0.082	0.036	-0.008	0.05*
		-6.1	0.026*	0*	-0.024	-0.048	-0.002	0.082	0.036	-0.008	0.05*
		-6	0.026*	0*	-0.024	-0.048	-0.002	0.082	0.036	-0.008	0.05*
		-5.9	0.026*	0*	-0.124	-0.048	-0.002	0.082	0.036	-0.008	0.05*
		-5.8	0.026*	0*	-0.024	-0.048	-0.002	0.082	0.036	-0.008	0.05*
		-5.7	0.026*	0*	-0.024	-0.048	0.098	0.182	0.136	-0.008	0.05*
		-5.6	0.026*	0*	-0.024	-0.048	0.098	0.182	0.136	-0.008	0.05*
		-5.5	0.026*	0*	-0.224	0.052	0.098	0.182	0.136	-0.008	0.05*
		-5.4	0.026*	0*	-0.224	0.052	0.098	0.082	0.136	-0.008	0.05*
		-5.3	0.026*	0*	-0.224	-0.048	0.098	0.082	0.136	0.092	0.05*
		-5.2	0.026*	0*	-0.124	0.052	0.098	0.082	0.036	-0.008	0.05*
		-5.1	0.026*	0*	-0.124	0.052	0.098	0.082	0.036	-0.008	-0.05*
		-5	0.026*	0.1*	-0.024	0.152	0.098	0.082	0.036	-0.008	0.05*
		-4.9	0.026*	0.1*	-0.024	0.152	0.098	-0.018	0.036	-0.008	0.05*
		-4.8	0.026*	0.1*	-0.024	0.152	0.098	-0.018	-0.064	-0.008	0.05*
		-4.7	0.026*	0.1*	-0.024	0.152	0.098	-0.018	-0.064	-0.008	0.05*
		-4.6	0.026*	0.1*	-0.024	0.152	0.098	-0.018	-0.064	-0.008	0.05*
		-4.5	0.026*	0*	-0.024	0.152	0.098	-0.018	-0.064	-0.008	0.05*
		-4.4	0.026*	0*	-0.024	0.152	0.098	-0.018	-0.064	0.092	0.05*
		-4.3	0.026*	0*	-0.024	0.152	-0.002	-0.018	0.036	0.192	0.05*
		-4.2	0.026*	0*	-0.024	0.052	0.098	0.082	0.036	0.192	-0.05*
		-4.1	0.026*	0*	-0.124	0.052	0.098	0.082	0.036	0.192	-0.05*
		-4	0.026*	0*	-0.124	0.052	0.198	0.182	0.036	0.192	-0.05*
		-3.9	0.026*	0*	-0.124	0.052	0.198	0.082	0.036	0.192	-0.05*
		-3.8	0.026*	0*	-0.124	0.052	0.198	0.082	0.036	0.092	-0.05*
		-3.7	-0.074*	-0.1*	-0.124	0.052	0.198	0.082	0.036	0.092	-0.05*
		-3.6	-0.074*	-0.2*	-0.124	0.052	0.198	0.082	0.036	0.092	-0.05*
		-3.5	-0.074*	-0.2*	-0.124	0.052	0.098	-0.018	0.136	0.192	0.05*
		-3.4	-0.074*	-0.1*	-0.024	0.052	0.098	-0.018	0.036	0.192	0.05*
		-3.3	0.026*	-0.1*	-0.024	0.052	-0.002	-0.018	0.036	0.192	0.05*
		-3.2	0.026*	-0.1*	-0.024	0.052	-0.002	-0.018	-0.064	0.092	0.05*
		-3.1	0.026*	-0.2*	-0.124	0.052	0.098	0.082	0.036	0.192	0.05*
		-3	0.026*	-0.1*	-0.124	0.052	0.098	0.082	0.036	0.092	-0.05*
		-2.9	0.026*	-0.1*	-0.124	-0.048	0.098	0.082	0.036	0.092	0.05*
		-2.8	0.026*	-0.1*	-0.024	0.152	-0.002	-0.018	0.036	0.092	-0.05*
		-2.7	-0.074*	-0.1*	-0.024	0.152	0.098	0.082	0.036	0.192	-0.05*
		-2.6	-0.074*	-0.1*	-0.024	0.152	0.098	0.182	0.036	0.192	-0.05*
		-2.5	-0.074*	-0.1*	0.076	0.252	0.098	0.182	0.036	0.192	-0.15*
		-2.4	-0.074*	-0.1*	-0.124	0.152	0.198	0.182	0.036	0.092	-0.05*
		-2.3	-0.074*	0*	-0.124	0.052	0.198	0.182	-0.064	0.092	0.15*
		-2.2	-0.074*	0*	-0.124	0.052	0.198	0.182	-0.064	0.092	0.15*
		-2.1	0.026*	0.1*	-0.124	0.052	0.198	0.182	0.036	0.192	0.15*
		-2	0.026*	0.1*	-0.124	0.052	0.298	0.282	0.036	0.092	0.05*
		-1.9	0.126*	0*	-0.124	0.052	0.298	0.282	0.036	0.092	0.15*
		-1.8	0.126*	0*	-0.024	0.152	0.298	0.282	0.036	0.092	0.25*
		-1.7	0.126*	0*	-0.024	0.252	0.298	0.282	0.036	0.092	0.05*
		-1.6	0.226*	0*	0.076	0.352	0.298	0.282	-0.164	-0.208	0.05*
		-1.5	0.026*	-0.1*	0.176	0.352	0.498	0.382	-0.264	-0.008	0.05*
		-1.4	0.126*	0.4*	-0.024	0.252	0.298	-0.418	0.136	-0.508	-0.25*
		-1.3	0.626*	0.6*	0.476	0.552	-0.302	-0.718	0.036	-0.608	-0.15*
		-1.2	0.126*	0.1*	-0.124	0.152	0.198	-0.018	-0.364	-0.508	-0.05*
		-1.1	0.126*	0*	-0.324	-0.248	0.198	0.182	-0.264	-0.508	-0.05*
		-1	0.126*	-0.2*	0.176	0.552	0.298	0.482	-0.064	-0.108	0.05*
		-0.9	0.426*	0*	-0.224	0.152	0.098	0.582	-0.064	-0.108	0.05*
		-0.8	0.126*	-0.8*	-2.424	-2.148	-1.302	-1.318	0.036	0.892	-1.75*
		-0.7	0.126*	-0.6*	-1.724	-1.348	-0.102	-0.718	0.136	0.692	-0.65*
		-0.6	0.326*	0*	-0.724	-0.248	0.098	0.182	0.036	0.292	-0.35*
		-0.5	0.226*	-0.4*	-0.524	-0.348	-0.102	0.082	0.336	-0.008	-0.35*
		-0.4	0.126*	0*	-0.424	0.052	0.198	0.382	0.036	0.092	-0.25*
		-0.3	0.226*	-0.1*	-0.224	0.252	0.298	0.282	0.036	-0.108	0.05*
		-0.2	0.126*	-0.3*	0.176	0.852	0.498	0.982	0.036	-0.008	0.05*
		-0.1	0.226*	0.2*	1.076	1.452	0.898	1.982	-0.264	-0.308	0.85*
		0	-1.374*	-1*	2.076	2.152	0.598	7.782	-2.864	-14.708	1.85*
		0.1	-3.974*	-3.9*	1.176	-0.048	-3.202	7.282	-18.964	-38.508	0.45*
		0.2	-4.274*	-4.5*	-0.224	-1.748	-4.102	1.382	-22.764	-38.308	-0.05*
		0.3	-3.674*	-4*	-0.124	-1.548	-3.602	-0.618	-19.464	-31.608	-0.65*
		0.4	-2.774*	-3*	-0.924	-2.148	-3.202	-1.218	-16.164	-25.608	-0.65*
		0.5	-2.374*	-2.6*	-0.824	-1.848	-3.002	-1.718	-13.364	-20.808	-0.85*
		0.6	-2.274*	-2.7*	-0.724	-1.648	-2.502	-1.318	-10.164	-16.308	-1.05*
		0.7	-1.774*	-2.1*	-0.324	-0.848	-1.402	-0.818	-8.264	-12.408	-0.85*
		0.8	-1.374*	-1.6*	-0.624	-0.948	-1.302	-0.718	-6.264	-9.608	-0.25*
		0.9	-1.274*	-1.2*	-0.224	-0.548	-0.802	-0.018	-4.264	-6.308	-0.65*
		1	-0.774*	-0.7*	-0.024	-0.048	-0.002	0.782	-2.964	-4.208	-0.05*
		1.1	-0.274*	-0.4*	0.376	0.452	0.098	0.982	-1.964	-2.308	-0.25*
		1.2	0.126*	-0.2*	0.476	0.452	0.398	1.482	-0.364	-0.508	0.15*
		1.3	0.226*	0.1*	0.576	0.352	0.698	1.982	0.836	0.892	0.25*
		1.4	0.126*	0.1*	0.576	0.452	0.998	2.182	1.336	2.192	0.55*
		1.5	0.326*	0.3*	0.676	0.752	1.198	2.582	1.836	3.392	0.55*
		1.6	0.226*	0.3*	0.876	1.152	1.598	3.182	2.436	4.392	0.75*
		1.7	0.426*	0.4*	0.976	1.352	1.798	3.382	2.936	4.992	0.65*
		1.8	0.226*	0.3*	0.976	1.352	2.098	3.482	3.236	5.592	0.75*
		1.9	0.326*	0.3*	0.976	1.352	2.198	3.682	3.636	6.192	1.05*
		2	0.326*	0.2*	0.976	1.352	2.198	3.682	4.136	6.892	0.85*
		2.1	0.426*	0.3*	0.976	1.252	2.198	3.982	4.536	7.292	0.75*
		2.2	0.626*	0.6*	0.976	1.452	2.298	4.182	5.136	7.992	0.75*
		2.3	0.626*	0.6*	1.076	1.552	2.198	4.282	5.336	8.492	0.85*
		2.4	0.626*	0.6*	0.776	1.352	2.498	4.382	5.536	8.692	0.85*
		2.5	0.526*	0.5*	0.876	1.452	2.598	4.482	5.636	8.792	0.85*
		2.6	0.526*	0.5*	0.976	1.552	2.798	4.682	5.736	8.992	0.65*
		2.7	0.526*	0.6*	0.976	1.652	2.698	4.682	6.036	9.392	0.65*
		2.8	0.526*	0.6*	0.976	1.652	2.798	4.882	6.336	9.592	0.75*
		2.9	0.726*	0.7*	1.176	1.852	2.798	4.982	6.636	9.992	0.75*
		3	0.726*	0.7*	1.276	1.952	2.898	4.982	6.636	10.192	0.75*
		3.1	0.726*	0.8*	1.376	2.052	2.998	5.082	6.836	10.392	0.75*
		3.2	0.726*	0.8*	1.376	1.852	2.898	5.182	7.036	10.492	0.85*
		3.3	0.726*	0.8*	1.376	1.852	3.098	5.282	7.236	10.692	0.85*
		3.4	0.726*	0.8*	1.376	1.852	3.098	5.282	7.536	10.892	0.85*
		3.5	0.726*	0.7*	1.376	1.952	3.098	5.382	7.636	11.092	0.85*
		3.6	0.726*	0.9*	1.476	1.952	3.298	5.582	7.836	11.192	0.85*
		3.7	0.926*	1*	1.376	1.952	3.398	5.582	7.836	11.192	0.85*
		3.8	0.826*	1*	1.476	2.052	3.398	5.682	8.136	11.492	0.85*
		3.9	0.926*	1*	1.476	2.152	3.398	5.782	8.336	11.592	0.75*
		4	0.826*	1*	1.576	2.252	3.498	5.882	8.336	11.592	0.95*
		4.1	0.826*	1.1*	1.476	2.252	3.598	5.882	8.636	11.692	0.85*
		4.2	0.826*	0.9*	1.576	2.252	3.598	5.982	8.736	11.792	0.95*
		4.3	0.826*	1*	1.476	2.252	3.798	6.182	8.836	11.892	0.95*
		4.4	0.926*	1.1*	1.476	2.152	3.698	6.182	8.936	11.992	0.85*
		4.5	0.826*	1.1*	1.576	2.352	3.798	6.282	9.036	11.992	0.85*
		4.6	0.926*	1.2*	1.576	2.352	3.798	6.382	9.136	12.092	0.95*
		4.7	0.926*	1.2*	1.576	2.452	3.798	6.482	9.236	12.192	0.95*
		4.8	0.826*	1.1*	1.576	2.452	3.898	6.582	9.436	12.292	0.95*
		4.9	0.826*	1.1*	1.576	2.452	3.998	6.682	9.436	12.392	0.95*
		5	0.826*	1.1*	1.576	2.552	4.098	6.782	9.436	12.292	0.95*
		5.1	0.826*	1.1*	1.776	2.652	4.198	6.782	9.436	12.492	0.95*
		5.2	0.826*	1.1*	1.676	2.552	4.098	6.882	9.536	12.492	0.75*
		5.3	0.826*	1.1*	1.676	2.552	4.198	6.982	9.636	12.592	0.85*
		5.4	0.826*	1.1*	1.676	2.552	4.298	7.082	9.736	12.592	0.95*
		5.5	0.926*	1.1*	1.876	2.752	4.398	7.082	9.736	12.692	0.75*
		5.6	0.926*	1.1*	1.876	2.752	4.398	7.082	9.936	12.692	0.85*
		5.7	0.826*	1.1*	1.676	2.652	4.598	7.182	9.936	12.792	0.85*
		5.8	1.026*	1.2*	1.876	2.852	4.498	7.182	10.036	12.792	0.85*
		5.9	0.926*	1*	1.876	2.852	4.598	7.382	10.136	12.892	0.85*
		6	0.926*	1.1*	1.876	2.852	4.598	7.282	10.236	12.992	0.75*
		6.1	1.026*	1.1*	1.976	2.852	4.698	7.482	10.336	13.092	0.85*
		6.2	0.926*	1.2*	1.876	2.852	4.798	7.582	10.436	13.092	0.95*
		6.3	0.926*	1*	1.876	2.852	4.698	7.582	10.536	13.192	0.85*
		6.4	0.826*	1.1*	1.876	2.852	4.798	7.682	10.536	13.192	0.85*
		6.5	0.826*	1*	1.776	2.852	4.798	7.782	10.536	13.192	1.05*
		6.6	0.726*	0.9*	1.876	2.952	4.898	7.882	10.636	13.192	0.95*
		6.7	0.826*	1*	1.876	2.852	4.898	7.782	10.636	13.292	0.95*
		6.8	0.726*	0.9*	1.776	2.852	5.098	7.982	10.636	13.092	1.05*
		6.9	0.926*	1*	1.876	2.952	4.998	7.882	10.736	13.192	1.05*
		7	0.726*	1*	1.776	2.952	5.098	7.982	10.736	13.292	0.95*
		7.1	0.926*	1.1*	1.976	3.052	4.998	8.082	10.836	13.492	1.05*
		7.2	0.726*	1*	1.876	2.952	5.098	8.082	10.836	13.292	1.05*
		7.3	0.826*	1*	1.876	3.052	5.198	8.182	10.936	13.492	1.05*
		7.4	0.926*	1.2*	1.876	2.952	5.298	8.282	10.936	13.392	0.95*
		7.5	0.926*	1.2*	1.776	3.052	5.198	8.282	11.036	13.392	0.95*
		7.6	0.926*	1.2*	1.876	3.152	5.298	8.382	11.136	13.492	0.95*
		7.7	0.926*	1.3*	1.976	3.252	5.298	8.482	11.136	13.592	0.95*
		7.8	0.926*	1.2*	1.976	3.252	5.398	8.482	11.236	13.692	1.05*
		7.9	0.926*	1.3*	1.876	3.252	5.398	8.482	11.336	13.592	0.95*
		8	1.026*	1.3*	1.976	3.252	5.498	8.582	11.336	13.692	1.05*
		8.1	1.026*	1.3*	2.076	3.352	5.398	8.582	11.436	13.692	1.05*
		8.2	0.926*	1.3*	1.976	3.452	5.398	8.582	11.436	13.492	0.95*
		8.3	0.926*	1.3*	1.976	3.352	5.498	8.682	11.436	13.592	0.95*
		8.4	0.926*	1.3*	2.076	3.452	5.598	8.782	11.536	13.592	0.95*
		8.5	1.026*	1.3*	1.976	3.452	5.498	8.682	11.636	13.592	1.05*
		8.6	0.926*	1.3*	2.076	3.552	5.598	8.682	11.636	13.592	0.85*
		8.7	0.926*	1.3*	2.176	3.452	5.598	8.782	11.636	13.692	1.05*
		8.8	0.926*	1.3*	2.076	3.552	5.498	8.782	11.736	13.692	1.05*
		8.9	1.026*	1.4*	2.076	3.652	5.498	8.682	11.736	13.492	1.05*
		9	0.926*	1.4*	2.176	3.652	5.698	8.882	11.836	13.592	1.05*
		9.1	0.826*	1.2*	2.176	3.552	5.798	8.982	11.836	13.692	1.05*
		9.2	0.926*	1.3*	2.076	3.652	5.698	8.882	11.936	13.592	1.15*
		9.3	0.926*	1.4*	2.176	3.652	5.698	8.982	11.936	13.692	0.95*
		9.4	1.026*	1.3*	2.176	3.752	5.798	9.082	12.036	13.692	1.15*
		9.5	0.926*	1.4*	2.176	3.552	5.898	9.182	12.036	13.792	1.15*
		9.6	0.926*	1.3*	2.176	3.652	5.898	9.182	11.936	13.692	1.05*
		9.7	0.926*	1.3*	2.176	3.752	5.798	9.182	12.036	13.792	1.15*
		9.8	1.026*	1.4*	2.276	3.652	5.898	9.182	12.136	13.892	1.15*
		9.9	0.926*	1.4*	2.076	3.652	5.998	9.182	12.036	13.792	1.05*
		10	0.926*	1.3*	2.176	3.752	6.098	9.282	12.136	13.792	1.15*
		10.1	0.926*	1.4*	2.276	3.752	5.998	9.182	12.036	13.792	1.15*
		10.2	0.926*	1.4*	2.276	3.852	5.998	9.182	12.136	13.992	0.95*
		10.3	0.926*	1.4*	2.176	3.752	5.998	9.282	12.136	13.792	1.05*
		10.4	0.926*	1.3*	2.376	3.952	6.098	9.282	12.136	13.892	1.05*
		10.5	0.826*	1.2*	2.276	3.852	6.098	9.282	12.336	13.992	0.95*
		10.6	0.926*	1.3*	2.176	3.752	6.198	9.282	12.136	13.992	1.05*
		10.7	0.826*	1.3*	2.376	3.952	6.098	9.282	12.136	13.792	1.05*
		10.8	0.926*	1.4*	2.376	3.952	6.298	9.382	12.336	13.992	0.95*
		10.9	0.926*	1.3*	2.276	3.952	6.198	9.382	12.336	13.992	0.95*
		11	0.926*	1.4*	2.376	4.052	6.098	9.282	12.336	13.992	1.05*
		11.1	0.926*	1.3*	2.476	4.152	6.298	9.582	12.336	13.892	0.95*
		11.2	0.826*	1.3*	2.376	4.052	6.198	9.482	12.336	13.992	0.95*
		11.3	0.926*	1.3*	2.376	4.052	6.298	9.482	12.436	13.992	1.05*
		11.4	1.026*	1.4*	2.476	4.152	6.398	9.482	12.336	13.892	1.05*
		11.5	0.926*	1.3*	2.476	4.152	6.498	9.582	12.436	14.092	1.05*
		11.6	1.026*	1.3*	2.476	4.052	6.398	9.682	12.436	13.992	1.05*
		11.7	1.026*	1.5*	2.476	4.252	6.398	9.582	12.536	13.992	1.15*
		11.8	1.026*	1.4*	2.576	4.252	6.598	9.782	12.436	13.892	1.15*
		11.9	1.026*	1.5*	2.476	4.152	6.498	9.682	12.436	13.992	1.15*
		12	1.026*	1.4*	2.476	4.252	6.598	9.682	12.636	13.992	1.15*
		12.1	1.026*	1.4*	2.476	4.152	6.598	9.782	12.536	13.992	1.15*
		12.2	0.926*	1.4*	2.676	4.252	6.598	9.882	12.536	13.992	1.25*
		12.3	1.026*	1.3*	2.576	4.252	6.698	9.782	12.636	13.992	1.25*
		12.4	1.126*	1.4*	2.676	4.352	6.698	9.882	12.636	13.992	1.15*
		12.5	1.026*	1.5*	2.576	4.352	6.698	9.982	12.636	14.092	1.25*
		12.6	1.026*	1.4*	2.676	4.352	6.698	9.882	12.536	13.992	1.25*
		12.7	1.026*	1.3*	2.576	4.452	6.798	9.982	12.736	13.992	1.15*
		12.8	0.926*	1.4*	2.676	4.452	6.798	10.082	12.736	14.092	1.15*
		12.9	0.926*	1.4*	2.576	4.452	6.798	9.982	12.736	14.092	1.25*
		13	1.026*	1.4*	2.576	4.352	6.798	10.082	12.636	13.892	1.35*
		13.1	1.026*	1.4*	2.476	4.352	6.898	10.082	12.636	13.892	1.35*
		13.2	1.026*	1.4*	2.576	4.452	6.798	10.082	12.736	13.992	1.15*
		13.3	1.026*	1.4*	2.576	4.452	6.898	10.082	12.636	13.992	1.25*
		13.4	0.926*	1.4*	2.576	4.452	6.998	10.182	12.536	13.892	1.25*
		13.5	1.026*	1.5*	2.676	4.452	6.898	10.182	12.636	13.892	1.25*
		13.6	1.026*	1.4*	2.676	4.452	6.898	10.182	12.736	13.992	1.35*
		13.7	1.026*	1.4*	2.576	4.552	6.898	10.182	12.736	13.992	1.25*
		13.8	1.126*	1.5*	2.676	4.552	6.998	10.082	12.836	14.092	1.15*
		13.9	0.926*	1.4*	2.676	4.552	6.998	10.182	12.736	14.092	1.25*
		14	0.926*	1.4*	2.676	4.552	6.998	10.182	12.736	13.992	1.25*
		14.1	0.926*	1.5*	2.676	4.652	7.098	10.182	12.836	13.992	1.25*
		14.2	0.926*	1.4*	2.776	4.652	6.898	10.182	12.736	13.892	1.25*
		14.3	1.026*	1.4*	2.676	4.652	6.998	10.182	12.736	13.992	1.25*
		14.4	1.026*	1.4*	2.676	4.752	6.998	10.282	12.736	13.992	1.25*
		14.5	1.026*	1.5*	2.676	4.652	7.098	10.282	12.836	13.992	1.25*
		14.6	1.026*	1.5*	2.676	4.652	7.098	10.282	12.736	13.892	1.25*
		14.7	1.126*	1.4*	2.676	4.652	7.198	10.282	12.736	13.892	1.35*
		14.8	1.026*	1.4*	2.776	4.652	7.098	10.282	12.736	13.892	1.25*
		14.9	1.026*	1.4*	2.876	4.852	7.198	10.282	12.736	13.892	1.25*
		15	1.026*	1.5*	2.876	4.852	7.198	10.382	12.736	13.892	1.35*
		15.1	0.926*	1.4*	2.976	4.852	7.198	10.282	12.736	13.892	1.25*
		15.2	0.926*	1.4*	2.876	4.852	7.198	10.382	12.836	13.892	1.25*
		15.3	1.026*	1.4*	2.876	4.752	7.298	10.282	12.836	13.992	1.25*
		15.4	1.026*	1.5*	2.776	4.852	7.198	10.382	12.936	14.092	1.35*
		15.5	1.026*	1.5*	2.876	4.852	7.298	10.382	12.636	13.792	1.25*
		15.6	1.026*	1.4*	2.776	4.752	7.198	10.382	12.736	13.792	1.25*
		15.7	1.026*	1.4*	2.776	4.852	7.198	10.382	12.836	13.992	1.25*
		15.8	1.026*	1.5*	2.876	4.852	7.298	10.382	12.836	13.992	1.15*
		15.9	0.926*	1.5*	2.876	4.952	7.298	10.482	12.836	13.992	1.25*
		16	1.026*	1.5*	2.876	4.952	7.298	10.382	12.936	13.992	1.15*
		16.1	1.026*	1.6*	2.876	4.852	7.298	10.482	12.936	13.992	1.15*
		16.2	0.926*	1.4*	2.876	4.852	7.398	10.482	12.936	14.092	1.15*
		16.3	0.926*	1.4*	2.776	4.852	7.498	10.582	12.936	13.992	1.15*
		16.4	1.026*	1.4*	2.776	4.952	7.398	10.582	12.836	13.992	1.25*
		16.5	1.026*	1.5*	2.876	4.952	7.398	10.582	12.836	13.992	1.35*
		16.6	1.026*	1.5*	2.876	5.052	7.498	10.682	12.836	13.992	1.25*
		16.7	0.926*	1.4*	2.876	5.052	7.498	10.682	12.936	13.992	1.25*
		16.8	1.026*	1.4*	2.876	4.952	7.398	10.582	12.836	13.892	1.25*
		16.9	1.026*	1.5*	2.876	4.952	7.498	10.682	12.836	13.892	1.15*
		17	1.026*	1.5*	2.876	4.952	7.498	10.682	12.836	13.892	1.25*
		17.1	1.026*	1.5*	2.876	5.052	7.498	10.682	12.936	13.892	1.15*
		17.2	1.126*	1.6*	2.976	5.052	7.598	10.782	12.936	13.992	1.15*
		17.3	0.926*	1.5*	2.976	5.152	7.498	10.582	12.936	13.992	1.15*
		17.4	0.926*	1.5*	2.876	5.052	7.498	10.582	12.836	13.892	1.25*
		17.5	1.026*	1.6*	2.876	4.952	7.498	10.582	12.836	13.892	1.25*
		17.6	1.026*	1.6*	2.976	5.052	7.498	10.682	12.936	13.892	1.15*
		17.7	1.026*	1.6*	2.976	5.052	7.598	10.682	12.936	13.892	1.15*
		17.8	0.926*	1.5*	2.976	5.052	7.598	10.782	12.936	13.992	1.15*
		17.9	1.026*	1.6*	2.976	5.152	7.598	10.782	12.736	13.892	1.15*
		18	1.026*	1.6*	2.976	5.152	7.598	10.682	12.736	13.892	1.25*
		18.1	1.026*	1.6*	2.976	5.152	7.598	10.782	12.836	13.892	1.15*
		18.2	1.026*	1.6*	2.976	5.252	7.698	10.782	12.836	13.892	1.15*
		18.3	0.926*	1.6*	2.876	5.152	7.698	10.782	12.836	13.892	1.15*
		18.4	1.026*	1.6*	2.976	5.152	7.698	10.882	12.836	13.892	1.15*
		18.5	1.026*	1.6*	2.976	5.252	7.798	10.782	12.936	13.892	1.25*
		18.6	1.026*	1.6*	2.976	5.252	7.698	10.682	12.836	13.792	1.15*
		18.7	1.026*	1.7*	2.876	5.052	7.798	10.682	12.736	13.692	1.15*
		18.8	1.026*	1.5*	2.976	5.152	7.798	10.782	12.736	13.792	1.15*
		18.9	1.026*	1.5*	2.976	5.152	7.798	10.782	12.836	13.792	1.25*
		19	1.026*	1.5*	2.976	5.152	7.798	10.682	12.836	13.792	1.25*
		19.1	1.026*	1.6*	3.076	5.252	7.798	10.682	12.836	13.792	1.25*
		19.2	1.026*	1.6*	3.076	5.252	7.898	10.782	12.736	13.692	1.15*
		19.3	0.826*	1.5*	3.076	5.252	7.898	10.782	12.936	13.892	1.15*
		19.4	0.826*	1.5*	3.076	5.352	7.798	10.782	12.836	13.792	1.25*
		19.5	0.926*	1.6*	3.076	5.252	7.798	10.782	12.836	13.792	1.25*
		19.6	0.926*	1.6*	3.076	5.252	7.798	10.782	12.736	13.692	1.15*
		19.7	0.926*	1.6*	3.076	5.252	7.898	10.782	12.736	13.692	1.15*
		19.8	0.826*	1.5*	3.176	5.352	7.898	10.882	12.836	13.792	1.15*
		19.9	0.826*	1.6*	3.176	5.352	7.898	10.782	12.836	13.792	1.15*
		20	0.926*	1.6*	3.176	5.352	7.898	10.882	12.836	13.792	1.15*
		20.1	0.926*	1.6*	3.176	5.352	7.898	10.882	12.836	13.792	1.15*
		20.2	0.926*	1.6*	3.176	5.352	7.998	10.882	12.836	13.792	1.05*
		20.3	0.826*	1.6*	3.176	5.352	7.998	10.882	12.836	13.692	1.15*
		20.4	0.826*	1.6*	3.176	5.252	7.898	10.882	12.836	13.792	1.15*
		20.5	0.926*	1.6*	3.276	5.352	7.998	10.882	12.836	13.792	1.15*
		20.6	0.926*	1.6*	3.176	5.252	7.998	10.882	12.836	13.792	1.15*
		20.7	0.926*	1.7*	3.176	5.252	8.098	10.982	12.836	13.792	1.15*
		20.8	0.826*	1.6*	3.276	5.352	8.098	10.982	12.836	13.792	1.15*
		20.9	0.926*	1.6*	3.276	5.352	7.998	10.882	12.836	13.792	1.15*
		21	0.926*	1.7*	3.276	5.452	8.098	10.982	12.836	13.792	1.15*
		21.1	0.926*	1.7*	3.376	5.452	8.098	10.982	12.836	13.792	1.25*
		21.2	0.926*	1.7*	3.276	5.352	8.198	11.082	12.936	13.792	1.15*
		21.3	0.926*	1.7*	3.276	5.452	8.198	11.082	12.936	13.892	1.25*
		21.4	1.026*	1.7*	3.376	5.452	8.098	10.982	12.936	13.892	1.15*
		21.5	0.926*	1.7*	3.376	5.452	8.198	11.082	12.836	13.792	1.25*
		21.6	0.926*	1.7*	3.276	5.452	8.198	10.982	12.836	13.792	1.25*
		21.7	1.026*	1.7*	3.276	5.452	8.198	10.982	12.836	13.892	1.25*
		21.8	0.926*	1.8*	3.376	5.452	8.298	10.982	12.836	13.992	1.25*
		21.9	0.926*	1.8*	3.376	5.552	8.098	10.982	12.936	13.992	1.25*
		22	0.926*	1.7*	3.376	5.552	8.098	10.982	12.836	13.892	1.35*
		22.1	0.926*	1.7*	3.376	5.452	8.198	10.982	12.836	13.892	1.25*
		22.2	1.026*	1.8*	3.376	5.552	8.198	10.982	12.836	13.892	1.25*
		22.3	1.126*	1.9*	3.276	5.552	8.198	11.082	12.836	13.992	1.25*
		22.4	1.126*	1.9*	3.276	5.552	8.198	10.982	12.736	13.992	1.25*
		22.5	1.126*	1.9*	3.476	5.652	8.298	11.082	12.636	13.892	1.35*
		22.6	1.026*	1.8*	3.376	5.652	8.298	11.182	12.736	13.892	1.35*
		22.7	1.026*	1.8*	3.376	5.552	8.398	11.182	12.736	13.892	1.25*
		22.8	1.126*	1.9*	3.476	5.552	8.398	11.182	12.736	13.892	1.25*
		22.9	1.126*	1.9*	3.476	5.652	8.298	11.082	12.736	13.892	1.25*
		23	1.126*	1.9*	3.376	5.552	8.398	10.982	12.636	13.792	1.35*
		23.1	1.226*	1.9*	3.376	5.552	8.398	11.082	12.736	13.792	1.35*
		23.2	1.226*	2*	3.476	5.552	8.398	11.082	12.736	13.792	1.25*
		23.3	1.226*	2*	3.476	5.652	8.398	10.982	12.736	13.792	1.25*
		23.4	1.126*	1.9*	3.476	5.652	8.398	10.982	12.636	13.792	1.35*
		23.5	1.026*	1.9*	3.476	5.652	8.298	11.082	12.736	13.792	1.35*
		23.6	1.126*	2*	3.476	5.752	8.398	11.082	12.836	13.892	1.35*
		23.7	1.126*	2*	3.376	5.652	8.398	11.082	12.836	13.892	1.25*
		23.8	1.126*	2*	3.476	5.652	8.498	11.182	12.836	13.892	1.25*
		23.9	1.026*	1.9*	3.476	5.752	8.498	11.082	12.936	13.892	1.35*
		24	1.126*	2*	3.376	5.752	8.498	11.182	12.836	13.792	1.35*
		24.1	1.126*	2*	3.376	5.852	8.498	11.182	12.736	13.792	1.35*
		24.2	1.126*	2*	3.376	5.752	8.498	11.182	12.736	13.892	1.25*
		24.3	1.126*	1.9*	3.376	5.752	8.598	11.182	12.736	13.792	1.25*
		24.4	1.126*	1.9*	3.376	5.652	8.598	11.182	12.836	13.892	1.15*
		24.5	1.126*	2.1*	3.476	5.752	8.498	11.182	12.836	13.892	1.25*
		24.6	1.226*	2*	3.476	5.752	8.498	11.182	12.736	13.792	1.25*
		24.7	1.226*	2*	3.476	5.752	8.598	11.182	12.736	13.792	1.25*
		24.8	1.226*	2*	3.376	5.752	8.598	11.182	12.836	13.792	1.15*
		24.9	1.226*	1.9*	3.476	5.752	8.598	11.182	12.836	13.792	1.15*
		25	1.226*	1.9*	3.476	5.752	8.598	11.182	12.836	13.792	1.15*
		25.1	1.226*	2*	3.476	5.752	8.598	11.182	12.836	13.892	1.25*
		25.2	1.226*	2*	3.576	5.852	8.598	11.082	12.836	13.792	1.15*
		25.3	1.126*	2*	3.476	5.752	8.598	11.082	12.836	13.792	1.15*
		25.4	1.126*	2.1*	3.476	5.752	8.598	11.182	12.836	13.792	1.25*
		25.5	1.126*	2.1*	3.476	5.752	8.698	11.182	12.836	13.792	1.25*
		25.6	1.126*	2.1*	3.576	5.852	8.698	11.182	12.936	13.792	1.15*
		25.7	1.126*	2*	3.576	5.852	8.598	11.082	12.836	13.792	1.15*
		25.8	1.026*	1.9*	3.576	5.852	8.598	11.182	12.836	13.792	1.15*
		25.9	1.026*	1.9*	3.576	5.752	8.598	11.182	12.836	13.792	1.25*
		26	1.026*	2*	3.576	5.852	8.598	11.182	12.736	13.792	1.25*
		26.1	1.026*	2*	3.576	5.852	8.498	11.082	12.836	13.792	1.25*
		26.2	1.026*	2*	3.476	5.752	8.498	11.082	12.836	13.792	1.25*
		26.3	0.926*	2*	3.576	5.752	8.498	11.182	12.836	13.792	1.15*
		26.4	0.926*	2*	3.576	5.752	8.598	11.182	12.836	13.792	1.15*
		26.5	1.026*	2.1*	3.576	5.852	8.598	11.182	12.736	13.692	1.25*
		26.6	0.926*	2.1*	3.476	5.752	8.598	11.182	12.836	13.692	1.25*
		26.7	0.926*	2.1*	3.476	5.752	8.598	11.182	12.836	13.692	1.15*
		26.8	0.926*	2.1*	3.576	5.752	8.498	11.082	12.836	13.692	1.15*
		26.9	0.826*	2*	3.576	5.752	8.598	11.082	12.836	13.692	1.25*
		27	0.826*	2*	3.576	5.752	8.598	11.182	12.836	13.792	1.15*
		27.1	1.026*	2.1*	3.476	5.652	8.598	11.182	12.836	13.792	1.15*
		27.2	1.026*	2.1*	3.576	5.852	8.598	11.182	12.736	13.692	1.15*
		27.3	1.026*	2.1*	3.576	5.852	8.498	11.082	12.736	13.692	1.15*
		27.4	0.926*	2.1*	3.576	5.852	8.498	11.082	12.736	13.692	1.15*
		27.5	0.926*	2*	3.676	5.852	8.498	11.082	12.836	13.692	1.15*
		27.6	0.826*	2*	3.676	5.852	8.598	11.082	12.836	13.692	1.15*
		27.7	0.926*	2*	3.576	5.852	8.598	11.082	12.836	13.592	1.15*
		27.8	0.926*	2.1*	3.676	5.852	8.598	11.082	12.836	13.592	1.35*
		27.9	0.826*	2*	3.676	5.952	8.598	11.082	12.936	13.692	1.25*
		28	0.726*	2.1*	3.576	5.852	8.798	11.082	12.936	13.692	1.25*
		28.1	0.726*	2.1*	3.576	5.952	8.698	11.082	12.936	13.592	1.35*
		28.2	0.626*	2*	3.676	6.052	8.698	11.082	12.936	13.592	1.35*
		28.3	0.626*	2.1*	3.676	5.952	8.698	11.082	12.936	13.592	1.25*
		28.4	0.626*	2*	3.676	6.052	8.898	11.182	12.936	13.692	1.35*
		28.5	0.626*	2*	3.776	6.052	8.798	11.082	12.936	13.692	1.25*
		28.6	0.626*	2*	3.676	6.052	8.798	11.182	12.736	13.492	1.45*
		28.7	0.526*	2*	3.776	6.052	8.598	11.382	12.836	13.592	1.35*
		28.8	0.626*	2.2*	3.676	5.852	8.498	10.882	12.736	13.392	1.35*
		28.9	0.726*	2.2*	3.676	6.152	8.398	10.682	12.736	13.592	1.45*
		29	0.726*	2.3*	3.676	6.152	8.498	10.782	12.836	13.392	1.25*
		29.1	0.526*	2.2*	3.876	6.752	8.398	10.282	12.536	12.992	1.15*
		29.2	0.726*	2.3*	3.776	6.352	8.598	11.382	12.836	13.292	1.15*
		29.3	0.626*	2*	3.576	6.252	8.498	11.482	12.736	13.492	1.25*
		29.4	0.626*	1.9*	2.976	5.752	8.398	11.282	12.936	13.792	1.25*
		29.5	0.626*	1.8*	2.676	5.452	7.998	10.582	12.536	14.092	0.85*
		29.6	0.426*	2*	2.576	5.052	8.398	10.582	12.536	14.292	0.75*
		29.7	0.426*	1.6*	1.276	3.952	7.498	9.082	12.736	14.392	-0.35*
		29.8	0.626*	1.9*	3.476	6.152	9.398	10.282	12.636	14.292	1.55*
		29.9	-0.074*	1.8*	3.876	6.152	8.398	1.582	12.636	7.892	1.35*
		30	-1.774*	-0.1*	-0.024	0.152	0.998	-13.218	3.936	-4.908	-4.95*
		30.1	2.526*	3.5*	-2.024	1.752	6.698	-3.118	17.736	35.592	-3.35*
		30.2	3.726*	4.7*	1.276	5.252	9.598	7.982	27.536	38.392	-0.85*
		30.3	2.726*	3.9*	2.876	6.652	10.098	10.282	24.436	31.792	1.15*
		30.4	2.226*	3.4*	3.976	6.852	9.898	11.082	21.336	26.492	1.25*
		30.5	1.926*	2.9*	4.176	6.552	9.998	11.182	19.036	22.792	1.35*
		30.6	1.826*	3*	4.176	6.852	9.698	11.482	17.736	20.792	1.25*
		30.7	1.626*	2.8*	3.376	6.452	8.798	10.682	16.336	19.092	0.95*
		30.8	1.326*	2*	3.476	5.952	8.798	10.982	15.736	17.792	1.15*
		30.9	1.226*	2.1*	3.276	5.552	8.498	10.782	14.836	17.092	1.45*
		31	1.426*	2.3*	3.376	5.652	8.398	10.482	14.436	16.192	1.25*
		31.1	1.326*	2.1*	3.276	5.852	8.598	10.482	13.836	15.592	1.25*
		31.2	1.226*	2.1*	3.176	5.752	8.298	10.482	13.436	14.792	1.25*
		31.3	1.226*	2.1*	3.476	5.852	8.098	10.282	13.136	14.492	1.15*
		31.4	1.026*	2.1*	3.476	5.652	8.098	10.082	12.736	13.992	0.95*
		31.5	1.026*	2.2*	3.576	5.752	7.798	9.982	12.936	13.892	0.95*
		31.6	0.926*	2.1*	3.476	5.852	7.798	9.982	12.936	13.892	1.05*
		31.7	0.926*	2.2*	3.376	5.752	7.898	10.082	12.536	13.492	1.35*
		31.8	0.826*	2.1*	3.376	5.852	8.098	10.082	12.236	13.192	1.05*
		31.9	0.826*	2.1*	3.376	6.052	8.098	10.082	12.036	13.092	0.85*
		32	0.826*	1.9*	3.276	5.752	7.998	10.082	11.936	12.992	0.85*
		32.1	0.726*	1.7*	3.276	5.652	7.998	9.982	11.936	12.992	0.85*
		32.2	0.626*	1.6*	3.276	5.452	7.798	9.882	11.836	12.892	0.85*
		32.3	0.826*	1.7*	3.276	5.452	7.598	9.782	11.836	12.992	0.85*
		32.4	1.026*	1.9*	3.076	5.552	7.498	9.682	11.836	12.792	0.75*
		32.5	1.026*	2*	3.076	5.552	7.698	9.882	11.736	12.492	0.75*
		32.6	1.026*	1.9*	2.976	5.352	7.598	9.782	11.536	12.392	0.75*
		32.7	1.026*	1.8*	3.176	5.352	7.598	9.682	11.436	12.292	0.95*
		32.8	0.926*	1.7*	3.076	5.152	7.598	9.682	11.536	12.292	0.85*
		32.9	0.926*	1.8*	2.976	5.252	7.598	9.682	11.436	12.192	1.05*
		33	1.026*	1.7*	3.176	5.252	7.598	9.682	11.236	12.092	0.85*
		33.1	1.026*	1.8*	3.076	5.252	7.598	9.682	11.436	12.092	0.95*
		33.2	0.926*	1.8*	3.176	5.252	7.598	9.682	11.336	11.992	0.95*
		33.3	0.926*	1.7*	3.176	5.352	7.498	9.682	11.136	11.992	0.85*
		33.4	1.026*	1.8*	3.276	5.252	7.398	9.582	11.236	11.992	0.85*
		33.5	1.026*	1.8*	3.176	5.352	7.398	9.682	11.236	11.892	0.95*
		33.6	1.026*	1.8*	3.276	5.452	7.498	9.582	11.136	11.992	0.95*
		33.7	1.026*	1.8*	3.276	5.252	7.298	9.482	11.136	11.892	0.85*
		33.8	1.026*	1.7*	3.276	5.352	7.298	9.382	11.136	11.792	1.05*
		33.9	1.026*	1.7*	3.176	5.352	7.298	9.482	11.136	11.792	1.05*
		34	1.026*	1.8*	3.176	5.252	7.298	9.382	11.136	11.692	0.95*
		34.1	1.126*	1.7*	3.176	5.352	7.298	9.382	11.036	11.692	1.05*
		34.2	1.126*	1.7*	3.076	5.252	7.298	9.282	10.936	11.592	1.05*
		34.3	1.126*	1.7*	3.176	5.252	7.298	9.282	11.136	11.592	1.05*
		34.4	1.126*	1.7*	2.976	5.152	7.298	9.282	11.136	11.592	1.05*
		34.5	1.126*	1.7*	2.876	5.052	7.298	9.182	11.036	11.592	1.05*
		34.6	1.126*	1.7*	2.876	4.952	7.298	9.182	10.936	11.392	1.05*
		34.7	1.126*	1.7*	2.876	5.052	7.298	9.282	10.936	11.392	1.05*
		34.8	1.126*	1.7*	2.876	4.952	7.398	9.182	11.036	11.392	1.05*
		34.9	1.126*	1.7*	2.876	4.952	7.098	8.982	10.836	11.392	1.05*
		35	1.126*	1.7*	2.976	5.152	7.298	9.082	10.836	11.392	1.15*
		35.1	1.126*	1.7*	2.876	4.952	7.198	9.082	10.836	11.292	1.15*
		35.2	1.026*	1.8*	2.876	4.852	7.198	9.082	10.836	11.292	1.05*
		35.3	0.926*	1.7*	2.976	4.952	7.098	8.982	10.736	11.292	1.05*
		35.4	0.926*	1.7*	2.976	4.952	7.098	8.982	10.636	11.192	1.05*
		35.5	0.926*	1.7*	2.976	5.052	7.198	9.082	10.536	11.092	1.15*
		35.6	1.026*	1.8*	2.976	4.952	7.098	9.082	10.536	11.092	1.15*
		35.7	0.926*	1.8*	2.976	4.952	6.998	8.982	10.636	11.092	1.05*
		35.8	1.026*	1.8*	2.976	4.952	6.998	8.982	10.636	11.092	1.05*
		35.9	0.926*	1.7*	2.976	4.952	6.998	8.982	10.536	11.092	1.15*
		36	0.826*	1.6*	2.976	4.952	6.898	8.882	10.536	10.992	1.05*
		36.1	1.026*	1.8*	2.876	4.752	6.898	8.882	10.636	10.992	1.05*
		36.2	0.926*	1.7*	2.876	4.852	6.998	8.882	10.536	10.992	0.95*
		36.3	0.926*	1.6*	2.976	4.852	6.898	8.782	10.436	10.892	0.95*
		36.4	1.026*	1.7*	2.876	4.852	6.998	8.782	10.436	10.992	0.85*
		36.5	0.926*	1.6*	2.776	4.852	6.898	8.682	10.336	10.792	0.85*
		36.6	0.926*	1.6*	2.976	4.852	6.998	8.682	10.436	10.992	0.85*
		36.7	1.026*	1.7*	2.876	4.752	6.898	8.582	10.236	10.892	0.95*
		36.8	0.926*	1.5*	2.876	4.752	6.998	8.782	10.236	10.792	0.85*
		36.9	1.126*	1.7*	2.876	4.752	6.798	8.582	10.136	10.692	0.95*
		37	0.926*	1.6*	2.876	4.752	6.898	8.582	10.036	10.592	0.85*
		37.1	0.926*	1.5*	2.776	4.752	6.898	8.582	10.036	10.592	0.85*
		37.2	1.126*	1.7*	2.876	4.752	6.798	8.482	9.936	10.492	0.85*
		37.3	1.026*	1.6*	2.776	4.652	6.798	8.682	10.036	10.492	0.85*
		37.4	1.026*	1.5*	2.676	4.552	6.798	8.482	9.936	10.392	0.75*
		37.5	0.926*	1.6*	2.776	4.652	6.798	8.482	9.836	10.392	0.95*
		37.6	1.126*	1.6*	2.776	4.652	6.798	8.582	9.836	10.392	0.75*
		37.7	0.926*	1.5*	2.776	4.652	6.698	8.482	9.936	10.392	0.95*
		37.8	0.926*	1.5*	2.676	4.552	6.698	8.482	9.936	10.292	0.85*
		37.9	0.926*	1.5*	2.776	4.552	6.798	8.482	9.836	10.292	0.95*
		38	0.926*	1.5*	2.776	4.552	6.598	8.382	10.036	10.392	0.85*
		38.1	0.926*	1.5*	2.776	4.452	6.698	8.482	9.936	10.192	0.95*
		38.2	0.826*	1.4*	2.876	4.552	6.698	8.482	9.736	10.192	0.95*
		38.3	0.926*	1.6*	2.776	4.552	6.598	8.382	9.736	10.192	0.95*
		38.4	0.826*	1.4*	2.876	4.452	6.698	8.382	9.836	10.392	1.05*
		38.5	0.926*	1.6*	2.876	4.452	6.598	8.382	9.636	10.192	0.95*
		38.6	0.826*	1.6*	2.876	4.552	6.598	8.382	9.836	10.192	1.05*
		38.7	0.926*	1.6*	2.776	4.452	6.598	8.282	9.636	10.092	1.05*
		38.8	0.826*	1.5*	2.776	4.452	6.498	8.282	9.736	10.292	0.95*
		38.9	0.826*	1.5*	2.776	4.452	6.498	8.282	9.636	10.092	0.95*
		39	0.826*	1.5*	2.776	4.452	6.498	8.182	9.636	10.092	1.05*
		39.1	0.926*	1.6*	2.876	4.452	6.498	8.182	9.636	10.092	0.95*
		39.2	0.926*	1.6*	2.676	4.452	6.498	8.182	9.636	10.092	0.95*
		39.3	0.826*	1.5*	2.776	4.452	6.298	7.982	9.536	9.992	1.05*
		39.4	0.826*	1.5*	2.676	4.352	6.398	8.082	9.436	9.992	0.95*
		39.5	0.926*	1.5*	2.776	4.452	6.398	8.082	9.536	9.892	0.95*
		39.6	0.926*	1.5*	2.676	4.252	6.298	8.082	9.436	9.892	0.95*
		39.7	0.826*	1.5*	2.676	4.352	6.298	8.082	9.436	9.892	0.95*
		39.8	0.926*	1.5*	2.676	4.252	6.398	8.182	9.436	9.792	0.95*
		39.9	0.826*	1.5*	2.676	4.252	6.298	7.982	9.436	9.692	0.95*
		40	0.926*	1.5*	2.676	4.252	6.398	8.182	9.336	9.692	1.05*
		40.1	0.826*	1.5*	2.676	4.252	6.398	8.182	9.336	9.692	0.95*
		40.2	0.926*	1.5*	2.676	4.252	6.198	7.982	9.136	9.592	1.05*
		40.3	0.826*	1.4*	2.576	4.252	6.398	8.182	9.136	9.492	1.05*
		40.4	0.826*	1.4*	2.676	4.252	6.198	7.982	9.136	9.492	1.05*
		40.5	0.826*	1.4*	2.676	4.252	6.198	8.082	9.136	9.492	1.05*
		40.6	0.826*	1.3*	2.676	4.152	6.298	8.082	9.136	9.392	1.05*
		40.7	0.726*	1.3*	2.576	4.252	6.198	7.882	9.036	9.492	1.05*
		40.8	0.726*	1.2*	2.676	4.152	6.298	7.982	8.936	9.292	0.95*
		40.9	0.726*	1.4*	2.576	4.052	6.298	7.982	9.036	9.292	0.95*
		41	0.726*	1.2*	2.676	4.152	6.198	7.782	8.836	9.292	0.95*
		41.1	0.726*	1.3*	2.576	4.052	6.198	7.882	8.936	9.292	0.95*
		41.2	0.726*	1.3*	2.576	3.952	6.198	7.782	8.936	9.292	0.85*
		41.3	0.726*	1.2*	2.676	4.152	6.198	7.882	8.836	9.192	0.95*
		41.4	0.626*	1.2*	2.576	3.952	6.198	7.882	8.836	9.192	0.85*
		41.5	0.826*	1.3*	2.676	4.052	6.098	7.782	8.636	9.092	0.85*
		41.6	0.626*	1.3*	2.676	4.152	6.098	7.782	8.836	9.192	0.85*
		41.7	0.626*	1.2*	2.676	3.952	6.098	7.882	8.736	9.192	0.75*
		41.8	0.726*	1.3*	2.576	4.052	6.098	7.682	8.736	9.092	0.85*
		41.9	0.726*	1.4*	2.576	3.952	5.998	7.782	8.736	9.192	0.85*
		42	0.726*	1.2*	2.676	3.952	5.898	7.582	8.636	9.092	0.75*
		42.1	0.626*	1.2*	2.576	4.052	5.998	7.682	8.736	9.092	0.85*
		42.2	0.726*	1.3*	2.676	4.052	5.998	7.682	8.636	8.992	0.75*
		42.3	0.726*	1.2*	2.576	3.952	5.798	7.582	8.536	8.992	0.75*
		42.4	0.626*	1.2*	2.576	3.952	5.898	7.582	8.636	8.892	0.85*
		42.5	0.826*	1.4*	2.476	3.852	5.898	7.582	8.536	8.892	0.85*
		42.6	0.626*	1.3*	2.476	3.952	5.898	7.482	8.536	8.792	0.75*
		42.7	0.726*	1.2*	2.376	3.852	5.798	7.482	8.436	8.692	0.85*
		42.8	0.826*	1.4*	2.476	3.852	5.898	7.582	8.536	8.892	0.85*
		42.9	0.626*	1.2*	2.476	3.952	5.698	7.482	8.436	8.692	0.75*
		43	0.726*	1.2*	2.476	3.852	5.798	7.382	8.436	8.692	0.85*
		43.1	0.826*	1.4*	2.376	3.852	5.898	7.482	8.436	8.692	0.95*
		43.2	0.726*	1.2*	2.476	3.952	5.698	7.382	8.436	8.792	0.75*
		43.3	0.726*	1.2*	2.476	3.852	5.798	7.382	8.336	8.592	0.75*
		43.4	0.826*	1.3*	2.276	3.852	5.798	7.282	8.436	8.592	0.75*
		43.5	0.826*	1.3*	2.376	3.852	5.698	7.282	8.436	8.692	0.75*
		43.6	0.726*	1.2*	2.376	3.852	5.698	7.282	8.336	8.592	0.75*
		43.7	0.726*	1.3*	2.376	3.852	5.698	7.282	8.336	8.492	0.75*
		43.8	0.726*	1.3*	2.376	3.852	5.598	7.182	8.336	8.592	0.75*
		43.9	0.726*	1.2*	2.376	3.852	5.598	7.282	8.236	8.492	0.75*
		44	0.726*	1.3*	2.376	3.852	5.598	7.082	8.336	8.492	0.85*
		44.1	0.626*	1.2*	2.276	3.752	5.598	7.082	8.236	8.492	0.85*
		44.2	0.726*	1.2*	2.376	3.852	5.598	7.182	8.136	8.392	0.75*
		44.3	0.726*	1.2*	2.376	3.852	5.498	7.082	8.136	8.392	0.85*
		44.4	0.626*	1.2*	2.276	3.752	5.498	7.082	8.136	8.392	0.85*
		44.5	0.526*	1.1*	2.276	3.852	5.498	7.082	8.136	8.392	0.75*
		44.6	0.726*	1.3*	2.376	3.952	5.498	7.082	8.036	8.292	0.75*
		44.7	0.726*	1.2*	2.376	3.852	5.498	6.982	8.036	8.292	0.85*
		44.8	0.626*	1.2*	2.276	3.752	5.398	6.982	8.036	8.292	0.75*
		44.9	0.626*	1.2*	2.376	3.752	5.498	7.082	7.936	8.292	0.65*
		45	0.626*	1.2*	2.376	3.752	5.398	6.882	8.036	8.192	0.65*
		45.1	0.626*	1.2*	2.276	3.752	5.398	6.882	7.936	8.092	0.85*
		45.2	0.626*	1.1*	2.376	3.852	5.498	6.982	7.936	8.192	0.65*
		45.3	0.626*	1.3*	2.376	3.752	5.298	6.882	7.936	8.192	0.65*
		45.4	0.626*	1.2*	2.476	3.852	5.298	6.882	7.936	8.092	0.75*
		45.5	0.626*	1.1*	2.276	3.752	5.498	6.982	7.836	8.092	0.85*
		45.6	0.626*	1.2*	2.276	3.752	5.298	6.882	7.836	8.092	0.75*
		45.7	0.626*	1.2*	2.376	3.752	5.398	6.882	7.836	8.092	0.65*
		45.8	0.726*	1.3*	2.276	3.752	5.398	6.882	7.736	7.992	0.65*
		45.9	0.726*	1.2*	2.276	3.752	5.298	6.882	7.736	7.992	0.85*
		46	0.626*	1.1*	2.276	3.652	5.198	6.782	7.836	8.092	0.75*
		46.1	0.626*	1.2*	2.276	3.652	5.198	6.782	7.736	7.992	0.75*
		46.2	0.726*	1.3*	2.276	3.552	5.298	6.982	7.736	7.992	0.65*
		46.3	0.726*	1.1*	2.276	3.652	5.298	6.782	7.636	7.892	0.75*
		46.4	0.626*	1.1*	2.276	3.652	5.198	6.782	7.736	7.992	0.75*
		46.5	0.626*	1.2*	2.276	3.552	5.298	6.782	7.636	7.892	0.75*
		46.6	0.626*	1.2*	2.176	3.652	5.198	6.882	7.536	7.892	0.65*
		46.7	0.726*	1.3*	2.276	3.652	5.098	6.782	7.536	7.792	0.65*
		46.8	0.626*	1.1*	2.176	3.452	5.198	6.682	7.636	7.892	0.75*
		46.9	0.626*	1.1*	2.076	3.452	5.098	6.682	7.536	7.792	0.75*
		47	0.726*	1.1*	2.076	3.452	5.198	6.782	7.636	7.792	0.75*
		47.1	0.626*	1.2*	2.276	3.552	5.098	6.682	7.536	7.792	0.65*
		47.2	0.526*	1.1*	2.276	3.552	5.098	6.582	7.436	7.692	0.75*
		47.3	0.726*	1.2*	2.176	3.552	5.098	6.682	7.536	7.792	0.65*
		47.4	0.726*	1.1*	2.176	3.552	4.998	6.582	7.536	7.892	0.65*
		47.5	0.726*	1.2*	2.076	3.552	4.998	6.582	7.436	7.692	0.65*
		47.6	0.726*	1.2*	2.176	3.552	5.098	6.582	7.336	7.692	0.65*
		47.7	0.626*	1.1*	2.176	3.452	5.098	6.582	7.336	7.592	0.65*
		47.8	0.726*	1.1*	2.176	3.552	4.998	6.482	7.336	7.692	0.65*
		47.9	0.726*	1.1*	2.076	3.552	4.898	6.382	7.436	7.792	0.75*
		48	0.726*	1.1*	2.176	3.552	4.998	6.582	7.236	7.592	0.65*
		48.1	0.726*	1.2*	2.176	3.452	4.998	6.482	7.236	7.592	0.65*
		48.2	0.626*	1.1*	2.176	3.552	4.998	6.482	7.236	7.692	0.65*
		48.3	0.626*	1*	2.076	3.552	4.898	6.382	7.336	7.592	0.75*
		48.4	0.726*	1.1*	2.176	3.452	4.898	6.282	7.236	7.692	0.75*
		48.5	0.826*	1.1*	2.176	3.452	4.798	6.382	7.136	7.492	0.65*
		48.6	0.726*	1.2*	2.076	3.552	4.798	6.382	7.136	7.492	0.65*
		48.7	0.626*	1*	2.076	3.552	4.898	6.282	7.136	7.492	0.65*
		48.8	0.626*	1*	1.976	3.452	4.798	6.282	7.136	7.492	0.85*
		48.9	0.726*	1.1*	2.176	3.452	4.798	6.182	7.136	7.492	0.75*
		49	0.726*	1.1*	2.076	3.552	4.798	6.182	7.036	7.392	0.65*
		49.1	0.626*	1.1*	2.076	3.552	4.698	6.182	7.036	7.392	0.65*
		49.2	0.626*	1.1*	1.976	3.352	4.798	6.182	7.036	7.392	0.75*
		49.3	0.626*	1*	2.076	3.352	4.798	6.182	7.036	7.292	0.75*
		49.4	0.726*	1.1*	1.976	3.352	4.798	6.182	7.036	7.392	0.65*
		49.5	0.726*	1.1*	1.976	3.452	4.698	6.082	6.936	7.192	0.65*
		49.6	0.726*	1.2*	2.076	3.552	4.698	5.982	6.936	7.292	0.65*
		49.7	0.626*	1.1*	2.076	3.352	4.698	5.982	6.936	7.292	0.65*
		49.8	0.526*	1.1*	1.976	3.352	4.698	6.082	6.936	7.192	0.65*
		49.9	0.526*	1*	1.976	3.352	4.698	5.982	6.836	7.192	0.65*
		50	0.726*	1.1*	2.076	3.352	4.598	5.882	6.836	7.192	0.75*
		50.1	0.626*	1*	1.976	3.252	4.698	5.782	6.936	7.192	0.75*
		50.2	0.626*	1.1*	1.976	3.352	4.598	5.882	6.836	7.092	0.75*
		50.3	0.526*	1*	1.976	3.352	4.598	5.782	6.736	7.092	0.65*
		50.4	0.526*	1*	1.976	3.252	4.598	5.782	6.736	7.092	0.65*
		50.5	0.526*	1*	1.976	3.252	4.498	5.782	6.836	7.092	0.65*
		50.6	0.526*	1*	1.876	3.252	4.598	5.682	6.736	6.992	0.65*
		50.7	0.626*	0.9*	1.976	3.252	4.498	5.782	6.636	6.992	0.65*
		50.8	0.526*	1*	1.976	3.252	4.498	5.782	6.736	7.092	0.65*
		50.9	0.526*	1*	1.976	3.252	4.498	5.682	6.736	6.992	0.65*
		51	0.426*	0.9*	1.976	3.252	4.498	5.682	6.636	6.992	0.65*
		51.1	0.526*	1*	1.976	3.252	4.398	5.682	6.736	6.992	0.65*
		51.2	0.526*	0.9*	1.876	3.252	4.398	5.582	6.736	6.892	0.65*
		51.3	0.526*	0.9*	1.976	3.352	4.498	5.682	6.636	6.992	0.75*
		51.4	0.626*	1*	1.976	3.252	4.498	5.582	6.636	6.992	0.65*
		51.5	0.526*	1*	1.976	3.252	4.398	5.582	6.736	6.892	0.65*
		51.6	0.426*	0.9*	1.876	3.252	4.398	5.682	6.636	6.892	0.65*
		51.7	0.426*	0.9*	1.876	3.252	4.498	5.582	6.636	6.892	0.65*
		51.8	0.526*	0.9*	1.876	3.252	4.398	5.482	6.436	6.692	0.65*
		51.9	0.626*	0.9*	1.976	3.252	4.298	5.482	6.536	6.892	0.55*
		52	0.526*	1*	1.976	3.152	4.398	5.482	6.536	6.892	0.65*
		52.1	0.526*	1*	1.976	3.152	4.398	5.582	6.536	6.792	0.65*
		52.2	0.526*	1*	1.876	3.152	4.398	5.582	6.536	6.792	0.65*
		52.3	0.526*	0.9*	1.876	3.152	4.398	5.582	6.536	6.792	0.75*
		52.4	0.626*	0.9*	1.876	3.152	4.398	5.482	6.536	6.692	0.65*
		52.5	0.626*	0.9*	1.976	3.152	4.298	5.382	6.436	6.692	0.55*
		52.6	0.526*	1*	1.976	3.152	4.198	5.382	6.436	6.692	0.55*
		52.7	0.526*	0.9*	1.976	3.052	4.298	5.582	6.436	6.692	0.65*
		52.8	0.726*	1*	1.876	3.152	4.398	5.582	6.236	6.592	0.75*
		52.9	0.726*	1*	1.976	3.252	4.398	5.482	6.336	6.592	0.75*
		53	0.626*	0.9*	1.876	3.052	4.298	5.482	6.336	6.592	0.65*
		53.1	0.626*	0.9*	1.976	3.052	4.198	5.382	6.236	6.492	0.55*
		53.2	0.626*	1*	1.976	2.952	4.198	5.382	6.236	6.492	0.55*
		53.3	0.726*	1*	1.876	3.052	4.198	5.282	6.236	6.492	0.55*
		53.4	0.726*	1*	1.876	3.052	4.198	5.382	6.136	6.392	0.65*
		53.5	0.726*	1*	1.976	3.052	4.198	5.382	6.236	6.392	0.65*
		53.6	0.626*	0.8*	1.976	3.052	4.198	5.282	6.236	6.492	0.75*
		53.7	0.726*	1*	1.976	3.052	4.298	5.382	6.136	6.292	0.55*
		53.8	0.726*	1*	1.876	2.952	4.298	5.382	6.036	6.292	0.65*
		53.9	0.726*	1*	1.876	2.952	4.098	5.282	6.036	6.292	0.65*
		54	0.726*	1*	1.876	2.852	4.098	5.282	6.136	6.392	0.65*
		54.1	0.726*	1.1*	1.976	2.952	4.198	5.282	6.136	6.292	0.65*
		54.2	0.626*	0.9*	1.776	2.952	4.098	5.282	6.036	6.192	0.65*
		54.3	0.626*	0.9*	1.776	2.952	4.098	5.182	6.036	6.192	0.55*
		54.4	0.726*	1*	1.876	2.852	4.198	5.282	6.036	6.192	0.65*
		54.5	0.726*	1.1*	1.876	2.852	3.998	5.182	5.936	6.192	0.65*
		54.6	0.726*	1.1*	1.876	2.852	3.998	5.182	6.036	6.292	0.65*
		54.7	0.726*	1*	1.876	2.852	4.098	5.082	6.136	6.292	0.65*
		54.8	0.626*	0.9*	1.876	2.852	4.098	5.182	6.036	6.092	0.55*
		54.9	0.626*	1*	1.776	2.852	4.098	5.282	5.936	6.092	0.45*
		55	0.726*	1.1*	1.876	2.852	4.098	5.182	5.936	6.092	0.55*
		55.1	0.726*	1*	1.776	2.852	3.998	5.082	5.936	6.192	0.65*
		55.2	0.726*	1.1*	1.776	2.752	3.898	5.082	5.936	6.092	0.65*
		55.3	0.826*	1.1*	1.776	2.752	3.998	4.982	5.736	5.992	0.65*
		55.4	0.726*	1.1*	1.776	2.852	3.998	4.982	5.736	5.992	0.55*
		55.5	0.626*	1*	1.776	2.852	3.998	5.082	5.936	5.992	0.45*
		55.6	0.626*	0.9*	1.676	2.752	3.898	4.982	5.836	5.992	0.55*
		55.7	0.626*	1*	1.676	2.752	3.898	4.982	5.836	6.092	0.65*
		55.8	0.726*	1.1*	1.776	2.752	3.898	4.982	5.836	5.992	0.65*
		55.9	0.626*	1*	1.776	2.852	3.798	4.982	5.636	5.892	0.65*
		56	0.726*	1*	1.776	2.852	3.898	4.982	5.636	5.892	0.55*
		56.1	0.626*	1*	1.776	2.852	3.898	4.982	5.636	5.792	0.45*
		56.2	0.626*	1*	1.676	2.752	3.798	4.982	5.736	5.892	0.45*
		56.3	0.626*	1*	1.676	2.652	3.698	4.882	5.736	5.892	0.55*
		56.4	0.726*	1.1*	1.676	2.752	3.698	4.782	5.736	5.992	0.55*
		56.5	0.626*	1*	1.576	2.752	3.798	4.882	5.636	5.892	0.65*
		56.6	0.526*	1*	1.576	2.752	3.798	4.882	5.536	5.792	0.55*
		56.7	0.626*	1*	1.676	2.752	3.798	4.882	5.536	5.792	0.45*
		56.8	0.626*	1*	1.576	2.652	3.798	4.782	5.536	5.692	0.45*
		56.9	0.626*	1*	1.476	2.652	3.798	4.882	5.636	5.792	0.55*
		57	0.626*	1.1*	1.476	2.652	3.798	4.882	5.536	5.892	0.55*
		57.1	0.526*	0.9*	1.476	2.652	3.598	4.682	5.536	5.792	0.55*
		57.2	0.426*	0.9*	1.576	2.752	3.698	4.782	5.636	5.792	0.55*
		57.3	0.526*	1*	1.576	2.752	3.698	4.782	5.436	5.692	0.55*
		57.4	0.626*	1*	1.676	2.652	3.698	4.782	5.436	5.592	0.45*
		57.5	0.626*	1*	1.476	2.552	3.798	4.782	5.436	5.692	0.45*
		57.6	0.626*	1*	1.476	2.552	3.698	4.782	5.436	5.592	0.45*
		57.7	0.626*	1*	1.476	2.552	3.598	4.682	5.436	5.592	0.45*
		57.8	0.626*	0.9*	1.476	2.652	3.698	4.682	5.536	5.692	0.45*
		57.9	0.526*	1*	1.476	2.652	3.698	4.682	5.536	5.692	0.55*
		58	0.526*	1*	1.376	2.552	3.698	4.682	5.436	5.592	0.55*
		58.1	0.526*	1*	1.376	2.552	3.598	4.682	5.436	5.592	0.55*
		58.2	0.626*	1*	1.376	2.552	3.598	4.582	5.336	5.592	0.45*
		58.3	0.626*	1*	1.476	2.652	3.598	4.582	5.336	5.592	0.45*
		58.4	0.626*	1*	1.476	2.552	3.698	4.682	5.336	5.492	0.45*
		58.5	0.726*	1*	1.276	2.452	3.598	4.582	5.436	5.592	0.55*
		58.6	0.626*	1.1*	1.276	2.452	3.598	4.582	5.436	5.592	0.55*
		58.7	0.526*	1*	1.376	2.552	3.598	4.582	5.336	5.492	0.45*
		58.8	0.626*	1*	1.376	2.452	3.598	4.582	5.336	5.592	0.35*
		58.9	0.626*	1*	1.476	2.452	3.598	4.482	5.436	5.592	0.35*
		59	0.626*	1*	1.476	2.452	3.598	4.482	5.336	5.492	0.35*
		59.1	0.626*	1*	1.376	2.552	3.498	4.382	5.236	5.392	0.45*
		59.2	0.526*	0.9*	1.376	2.552	3.598	4.582	5.236	5.392	0.45*
		59.3	0.426*	0.9*	1.376	2.452	3.598	4.482	5.236	5.392	0.35*
		59.4	0.526*	0.9*	1.376	2.452	3.598	4.482	5.336	5.492	0.45*
		59.5	0.526*	0.9*	1.276	2.352	3.498	4.482	5.336	5.492	0.45*
		59.6	0.626*	1*	1.276	2.352	3.498	4.482	5.336	5.492	0.35*
		59.7	0.626*	1*	1.276	2.352	3.498	4.382	5.336	5.392	0.35*
		59.8	0.626*	1*	1.276	2.352	3.498	4.482	5.136	5.292	0.45*
		59.9	0.626*	1*	1.376	2.452	3.398	4.482	5.136	5.292	0.35*
		60	0.426*	0.9*	1.376	2.452	3.498	4.482	5.136	5.292	0.35*
		60.1	0.426*	0.8*	1.376	2.452	3.498	4.382	5.136	5.292	0.35*
		60.2	0.426*	0.8*	1.476	2.452	3.498	4.382	5.136	5.392	0.45*
		60.3	0.626*	0.9*	1.376	2.452	3.398	4.282	5.136	5.392	0.45*
		60.4	0.626*	0.9*	1.276	2.452	3.498	4.382	5.136	5.292	0.35*
		60.5	0.626*	0.9*	1.276	2.352	3.398	4.282	5.236	5.292	0.25*
		60.6	0.526*	0.8*	1.276	2.352	3.398	4.282	5.136	5.292	0.25*
		60.7	0.526*	0.9*	1.376	2.352	3.498	4.382	5.136	5.292	0.35*
		60.8	0.526*	0.9*	1.376	2.352	3.498	4.282	5.036	5.192	0.35*
		60.9	0.526*	0.8*	1.376	2.352	3.298	4.182	5.036	5.192	0.45*
		61	0.426*	0.8*	1.476	2.452	3.298	4.182	4.936	5.092	0.45*
		61.1	0.526*	0.8*	1.376	2.352	3.298	4.182	5.036	5.192	0.25*
		61.2	0.526*	0.8*	1.376	2.452	3.398	4.182	5.036	5.192	0.25*
		61.3	0.426*	0.7*	1.376	2.452	3.398	4.282	4.936	5.192	0.25*
		61.4	0.426*	0.8*	1.276	2.352	3.298	4.282	5.036	5.092	0.25*
		61.5	0.426*	0.8*	1.376	2.352	3.298	4.182	5.036	5.192	0.45*
		61.6	0.426*	0.8*	1.276	2.252	3.398	4.182	4.936	5.092	0.45*
		61.7	0.426*	0.8*	1.376	2.352	3.298	4.082	4.836	4.992	0.25*
		61.8	0.426*	0.8*	1.376	2.352	3.298	4.082	4.836	4.992	0.25*
		61.9	0.426*	0.8*	1.376	2.452	3.298	4.182	4.936	5.092	0.25*
		62	0.526*	0.8*	1.376	2.452	3.298	4.182	4.936	4.992	0.35*
		62.1	0.426*	0.7*	1.376	2.352	3.298	4.182	4.836	4.992	0.35*
		62.2	0.426*	0.7*	1.376	2.352	3.298	4.182	4.836	5.092	0.35*
		62.3	0.426*	0.7*	1.276	2.252	3.298	4.182	4.836	4.992	0.35*
		62.4	0.426*	0.6*	1.276	2.252	3.198	3.982	4.836	4.992	0.35*
		62.5	0.326*	0.6*	1.276	2.252	3.198	3.982	4.836	4.892	0.25*
		62.6	0.326*	0.7*	1.376	2.352	3.198	3.982	4.736	4.892	0.25*
		62.7	0.326*	0.6*	1.376	2.352	3.198	3.982	4.836	4.892	0.25*
		62.8	0.326*	0.6*	1.376	2.452	3.298	4.182	4.836	4.892	0.35*
		62.9	0.326*	0.6*	1.276	2.252	3.198	4.082	4.836	4.892	0.35*
		63	0.426*	0.7*	1.276	2.252	3.198	3.982	4.836	4.892	0.35*
		63.1	0.426*	0.7*	1.276	2.252	3.198	3.982	4.736	4.992	0.35*
		63.2	0.426*	0.7*	1.276	2.252	3.198	3.982	4.736	4.892	0.35*
		63.3	0.326*	0.7*	1.276	2.252	3.198	3.982	4.736	4.892	0.45*
		63.4	0.326*	0.7*	1.276	2.252	3.098	3.982	4.736	4.892	0.35*
		63.5	0.326*	0.7*	1.276	2.152	3.098	3.982	4.636	4.892	0.35*
		63.6	0.326*	0.7*	1.376	2.352	3.198	4.082	4.636	4.792	0.35*
		63.7	0.426*	0.7*	1.376	2.352	3.198	4.082	4.636	4.692	0.35*
		63.8	0.426*	0.7*	1.276	2.252	3.098	3.982	4.636	4.792	0.35*
		63.9	0.326*	0.8*	1.276	2.252	2.998	3.882	4.736	4.892	0.35*
		64	0.326*	0.7*	1.276	2.252	3.098	3.882	4.636	4.892	0.35*
		64.1	0.326*	0.7*	1.276	2.352	3.098	3.882	4.636	4.892	0.35*
		64.2	0.326*	0.7*	1.476	2.352	3.098	3.882	4.636	4.792	0.45*
		64.3	0.326*	0.7*	1.476	2.352	3.098	3.882	4.536	4.692	0.45*
		64.4	0.326*	0.7*	1.376	2.352	2.998	3.882	4.436	4.692	0.35*
		64.5	0.326*	0.7*	1.376	2.352	2.998	3.882	4.436	4.792	0.35*
		64.6	0.426*	0.8*	1.276	2.252	2.998	3.882	4.636	4.892	0.35*
		64.7	0.426*	0.8*	1.276	2.152	3.098	3.882	4.636	4.792	0.35*
		64.8	0.326*	0.8*	1.276	2.152	3.098	3.882	4.536	4.792	0.35*
		64.9	0.326*	0.8*	1.276	2.152	2.998	3.782	4.536	4.792	0.35*
		65	0.326*	0.8*	1.276	2.152	2.998	3.782	4.536	4.792	0.35*
		65.1	0.226*	0.7*	1.476	2.352	2.998	3.782	4.536	4.692	0.45*
		65.2	0.226*	0.7*	1.476	2.352	2.998	3.782	4.436	4.592	0.55*
		65.3	0.326*	0.8*	1.376	2.252	2.998	3.782	4.436	4.692	0.45*
		65.4	0.326*	0.8*	1.276	2.152	2.998	3.782	4.536	4.792	0.35*
		65.5	0.326*	0.8*	1.276	2.152	3.098	3.882	4.536	4.692	0.35*
		65.6	0.326*	0.8*	1.276	2.152	2.998	3.782	4.536	4.692	0.35*
		65.7	0.326*	0.8*	1.276	2.152	2.998	3.682	4.436	4.692	0.35*
		65.8	0.326*	0.8*	1.376	2.052	2.998	3.682	4.436	4.692	0.35*
		65.9	0.326*	0.8*	1.376	2.152	2.898	3.682	4.336	4.492	0.45*
		66	0.326*	0.8*	1.476	2.252	2.898	3.682	4.436	4.592	0.45*
		66.1	0.226*	0.8*	1.376	2.152	2.898	3.582	4.336	4.692	0.45*
		66.2	0.226*	0.8*	1.276	2.152	2.998	3.682	4.336	4.592	0.45*
		66.3	0.226*	0.9*	1.276	2.052	2.998	3.682	4.336	4.592	0.45*
		66.4	0.226*	0.9*	1.276	2.052	2.898	3.682	4.336	4.592	0.45*
		66.5	0.326*	0.9*	1.276	2.052	2.898	3.582	4.436	4.692	0.35*
		66.6	0.326*	0.9*	1.276	2.052	2.898	3.582	4.436	4.592	0.45*
		66.7	0.326*	0.8*	1.376	2.052	2.798	3.582	4.336	4.492	0.45*
		66.8	0.326*	0.8*	1.376	2.152	2.898	3.582	4.336	4.492	0.45*
		66.9	0.226*	0.8*	1.276	2.052	2.898	3.582	4.336	4.492	0.35*
		67	0.226*	0.8*	1.276	2.052	2.898	3.682	4.336	4.392	0.45*
		67.1	0.226*	0.9*	1.276	2.052	2.898	3.582	4.336	4.592	0.45*
		67.2	0.226*	0.9*	1.276	2.052	2.798	3.582	4.336	4.592	0.45*
		67.3	0.326*	0.9*	1.276	2.052	2.798	3.582	4.236	4.492	0.45*
		67.4	0.326*	0.9*	1.276	1.952	2.798	3.582	4.236	4.392	0.55*
		67.5	0.326*	0.9*	1.276	1.952	2.798	3.482	4.236	4.392	0.55*
		67.6	0.226*	0.8*	1.276	1.952	2.698	3.382	4.336	4.392	0.55*
		67.7	0.226*	0.8*	1.176	1.852	2.798	3.482	4.336	4.392	0.55*
		67.8	0.226*	0.8*	1.276	1.952	2.698	3.482	4.236	4.292	0.45*
		67.9	0.226*	0.8*	1.276	1.952	2.798	3.582	4.236	4.292	0.45*
		68	0.226*	0.8*	1.276	1.852	2.798	3.482	4.136	4.292	0.45*
		68.1	0.326*	0.8*	1.276	1.852	2.798	3.482	4.136	4.192	0.45*
		68.2	0.326*	0.8*	1.176	1.852	2.798	3.482	4.136	4.192	0.55*
		68.3	0.326*	0.8*	1.276	1.952	2.798	3.482	4.236	4.292	0.55*
		68.4	0.326*	0.9*	1.276	1.952	2.798	3.582	4.136	4.292	0.55*
		68.5	0.226*	0.8*	1.276	1.952	2.798	3.482	4.136	4.292	0.65*
		68.6	0.226*	0.8*	1.276	1.852	2.798	3.482	4.136	4.192	0.55*
		68.7	0.226*	0.8*	1.276	1.852	2.798	3.482	4.136	4.192	0.45*
		68.8	0.326*	0.8*	1.176	1.852	2.798	3.482	4.136	4.292	0.45*
		68.9	0.326*	0.7*	1.176	1.852	2.798	3.482	4.036	4.192	0.45*
		69	0.326*	0.7*	1.176	1.852	2.798	3.482	4.036	4.092	0.55*
		69.1	0.226*	0.7*	1.176	1.952	2.798	3.482	4.036	4.092	0.55*
		69.2	0.226*	0.7*	1.176	1.952	2.798	3.482	4.036	4.092	0.65*
		69.3	0.326*	0.9*	1.176	1.852	2.698	3.382	3.936	4.092	0.55*
		69.4	0.426*	0.9*	1.176	1.852	2.698	3.382	3.936	4.092	0.45*
		69.5	0.426*	0.9*	1.176	1.852	2.798	3.382	4.036	4.192	0.45*
		69.6	0.326*	0.8*	1.176	1.852	2.698	3.382	4.036	4.092	0.45*
		69.7	0.326*	0.8*	1.176	1.852	2.698	3.282	3.936	4.092	0.45*
		69.8	0.326*	0.7*	1.176	1.852	2.698	3.282	3.936	4.092	0.55*
		69.9	0.226*	0.7*	1.276	1.852	2.698	3.382	3.836	4.092	0.55*
		70	0.226*	0.7*	1.176	1.752	2.698	3.382	3.836	4.092	0.55*
		70.1	0.326*	0.8*	1.176	1.852	2.698	3.382	3.936	4.092	0.55*
		70.2	0.426*	0.9*	1.176	1.852	2.698	3.382	3.936	3.992	0.55*
		70.3	0.426*	0.9*	1.176	1.852	2.698	3.282	3.936	3.992	0.45*
		70.4	0.426*	0.9*	1.176	1.852	2.698	3.282	3.836	3.992	0.45*
		70.5	0.426*	0.9*	1.176	1.752	2.798	3.382	3.836	3.992	0.45*
		70.6	0.326*	0.7*	1.176	1.752	2.698	3.382	3.736	3.892	0.45*
		70.7	0.426*	0.7*	1.176	1.752	2.598	3.282	3.736	3.892	0.45*
		70.8	0.326*	0.7*	0.976	1.752	2.698	3.282	3.736	3.992	0.45*
		70.9	0.326*	0.7*	0.976	1.752	2.698	3.282	3.736	3.992	0.55*
		71	0.426*	0.8*	0.976	1.752	2.698	3.282	3.736	3.992	0.45*
		71.1	0.426*	0.9*	1.076	1.752	2.598	3.282	3.736	3.992	0.45*
		71.2	0.426*	0.9*	1.076	1.752	2.598	3.382	3.836	3.992	0.45*
		71.3	0.426*	0.8*	1.176	1.752	2.598	3.382	3.736	3.892	0.45*
		71.4	0.426*	0.7*	1.176	1.752	2.598	3.182	3.736	3.892	0.45*
		71.5	0.426*	0.7*	1.176	1.852	2.698	3.282	3.736	3.892	0.45*
		71.6	0.426*	0.7*	1.176	1.852	2.598	3.282	3.736	3.892	0.45*
		71.7	0.326*	0.7*	0.976	1.752	2.598	3.282	3.736	4.092	0.35*
		71.8	0.326*	0.7*	0.976	1.752	2.598	3.282	3.636	3.892	0.35*
		71.9	0.426*	0.8*	1.076	1.752	2.598	3.182	3.636	3.892	0.55*
		72	0.426*	0.9*	1.076	1.652	2.598	3.182	3.736	3.892	0.45*
		72.1	0.426*	0.9*	1.076	1.652	2.498	3.182	3.736	3.892	0.45*
		72.2	0.326*	0.8*	1.076	1.652	2.398	3.182	3.736	3.892	0.35*
		72.3	0.426*	0.8*	1.076	1.752	2.498	3.182	3.636	3.892	0.35*
		72.4	0.426*	0.8*	1.076	1.752	2.498	3.182	3.736	3.892	0.35*
		72.5	0.426*	0.7*	1.076	1.852	2.598	3.182	3.736	3.892	0.35*
		72.6	0.426*	0.7*	1.076	1.852	2.498	3.182	3.736	3.892	0.35*
		72.7	0.426*	0.7*	0.976	1.752	2.498	3.182	3.736	3.792	0.35*
		72.8	0.426*	0.8*	1.076	1.752	2.498	3.182	3.636	3.892	0.55*
		72.9	0.326*	0.7*	1.076	1.752	2.498	3.182	3.636	3.792	0.35*
		73	0.326*	0.7*	1.076	1.652	2.398	3.082	3.636	3.792	0.35*
		73.1	0.326*	0.7*	1.076	1.752	2.498	2.982	3.636	3.792	0.35*
		73.2	0.326*	0.6*	1.076	1.752	2.398	3.082	3.636	3.892	0.35*
		73.3	0.426*	0.7*	1.076	1.752	2.498	3.182	3.636	3.792	0.35*
		73.4	0.426*	0.7*	1.076	1.752	2.498	3.182	3.636	3.792	0.35*
		73.5	0.426*	0.7*	0.976	1.752	2.498	3.082	3.636	3.792	0.25*
		73.6	0.426*	0.7*	0.976	1.752	2.498	3.082	3.536	3.692	0.25*
		73.7	0.426*	0.7*	0.976	1.652	2.398	3.082	3.536	3.792	0.25*
		73.8	0.326*	0.7*	0.976	1.652	2.398	3.082	3.636	3.792	0.35*
		73.9	0.326*	0.7*	1.076	1.752	2.298	2.982	3.536	3.692	0.25*
		74	0.326*	0.7*	1.176	1.752	2.298	2.982	3.536	3.692	0.35*
		74.1	0.326*	0.7*	1.076	1.652	2.198	2.882	3.536	3.692	0.35*
		74.2	0.326*	0.7*	1.076	1.652	2.198	2.982	3.636	3.692	0.25*
		74.3	0.326*	0.7*	1.076	1.552	2.298	2.982	3.636	3.692	0.25*
		74.4	0.326*	0.7*	1.076	1.552	2.298	2.982	3.536	3.692	0.25*
		74.5	0.326*	0.7*	0.976	1.552	2.398	3.082	3.536	3.692	0.25*
		74.6	0.426*	0.7*	0.976	1.552	2.298	2.982	3.636	3.692	0.25*
		74.7	0.326*	0.6*	0.976	1.552	2.298	2.982	3.536	3.492	0.25*
		74.8	0.326*	0.6*	0.976	1.552	2.298	2.982	3.536	3.492	0.35*
		74.9	0.326*	0.6*	0.976	1.552	2.298	2.982	3.536	3.492	0.35*
		75	0.226*	0.6*	0.976	1.652	2.098	2.782	3.536	3.692	0.35*
		75.1	0.326*	0.7*	1.076	1.752	2.198	2.882	3.536	3.692	0.35*
		75.2	0.326*	0.7*	1.076	1.652	2.198	2.882	3.536	3.592	0.25*
		75.3	0.326*	0.7*	1.076	1.652	2.198	2.882	3.536	3.592	0.25*
		75.4	0.326*	0.7*	1.076	1.552	2.198	2.882	3.536	3.592	0.25*
		75.5	0.326*	0.7*	0.976	1.552	2.198	2.982	3.536	3.592	0.35*
		75.6	0.326*	0.7*	0.976	1.552	2.198	2.882	3.536	3.492	0.35*
		75.7	0.326*	0.6*	0.976	1.452	2.198	2.882	3.436	3.592	0.35*
		75.8	0.226*	0.7*	1.076	1.552	2.298	2.882	3.336	3.492	0.35*
		75.9	0.326*	0.7*	1.076	1.552	2.298	2.982	3.336	3.492	0.35*
		76	0.226*	0.6*	1.076	1.552	2.198	2.782	3.436	3.492	0.15*
		76.1	0.326*	0.7*	1.076	1.552	2.098	2.782	3.436	3.492	0.15*
		76.2	0.326*	0.7*	1.076	1.552	2.098	2.782	3.336	3.392	0.25*
		76.3	0.326*	0.7*	1.076	1.552	2.098	2.782	3.436	3.492	0.25*
		76.4	0.326*	0.7*	0.976	1.552	2.098	2.782	3.436	3.492	0.25*
		76.5	0.326*	0.7*	0.976	1.552	2.098	2.682	3.436	3.492	0.25*
		76.6	0.226*	0.7*	0.976	1.552	2.098	2.782	3.436	3.492	0.25*
		76.7	0.226*	0.7*	0.876	1.452	2.198	2.782	3.336	3.392	0.35*
		76.8	0.226*	0.6*	0.976	1.452	2.198	2.782	3.436	3.392	0.35*
		76.9	0.326*	0.6*	0.976	1.452	2.198	2.782	3.336	3.392	0.35*
		77	0.326*	0.6*	0.976	1.452	2.198	2.882	3.336	3.392	0.35*
		77.1	0.326*	0.6*	1.076	1.552	2.098	2.682	3.236	3.392	0.25*
		77.2	0.226*	0.5*	0.976	1.452	1.998	2.682	3.236	3.392	0.25*
		77.3	0.326*	0.6*	0.976	1.452	1.998	2.682	3.236	3.292	0.35*
		77.4	0.326*	0.7*	0.976	1.452	2.098	2.682	3.236	3.292	0.35*
		77.5	0.326*	0.7*	0.876	1.352	2.098	2.682	3.236	3.292	0.35*
		77.6	0.326*	0.7*	0.876	1.352	2.098	2.582	3.136	3.292	0.35*
		77.7	0.226*	0.7*	0.876	1.452	2.098	2.582	3.136	3.292	0.35*
		77.8	0.226*	0.7*	0.776	1.452	2.098	2.582	3.036	3.192	0.25*
		77.9	0.326*	0.7*	0.776	1.452	1.998	2.582	3.036	3.292	0.25*
		78	0.326*	0.7*	0.876	1.352	2.098	2.782	3.236	3.292	0.35*
		78.1	0.326*	0.6*	0.976	1.452	2.098	2.782	3.136	3.292	0.35*
		78.2	0.326*	0.6*	0.976	1.452	2.098	2.782	3.136	3.292	0.35*
		78.3	0.326*	0.6*	0.876	1.452	2.098	2.582	3.136	3.292	0.35*
		78.4	0.426*	0.8*	0.776	1.352	2.098	2.582	3.136	3.292	0.35*
		78.5	0.226*	0.7*	0.776	1.352	2.098	2.582	3.136	3.192	0.25*
		78.6	0.226*	0.7*	0.776	1.352	1.998	2.582	3.036	3.192	0.25*
		78.7	0.326*	0.7*	0.776	1.352	1.998	2.582	2.936	3.092	0.25*
		78.8	0.326*	0.7*	0.776	1.352	1.998	2.582	3.136	3.192	0.25*
		78.9	0.326*	0.7*	0.876	1.352	2.098	2.682	3.136	3.192	0.25*
		79	0.326*	0.6*	0.876	1.452	2.098	2.582	3.136	3.292	0.25*
		79.1	0.326*	0.6*	0.876	1.452	2.098	2.582	3.036	3.192	0.35*
		79.2	0.326*	0.6*	0.776	1.252	1.998	2.482	3.036	3.192	0.35*
		79.3	0.426*	0.7*	0.776	1.352	1.998	2.482	2.936	3.092	0.35*
		79.4	0.326*	0.6*	0.776	1.352	1.998	2.482	2.936	3.092	0.45*
		79.5	0.426*	0.7*	0.776	1.352	1.998	2.582	2.836	3.092	0.25*
		79.6	0.326*	0.7*	0.776	1.352	1.998	2.582	2.836	3.092	0.25*
		79.7	0.326*	0.7*	0.776	1.352	1.898	2.582	2.936	2.992	0.25*
		79.8	0.326*	0.7*	0.576	1.252	1.898	2.482	2.936	2.992	0.25*
		79.9	0.326*	0.7*	0.776	1.352	1.998	2.482	2.936	2.992	0.35*
		80	0.326*	0.7*	0.776	1.252	1.998	2.482	2.836	2.892	0.35*
		80.1	0.326*	0.6*	0.776	1.252	2.098	2.582	2.936	2.992	0.25*
		80.2	0.426*	0.6*	0.776	1.252	2.098	2.582	2.836	2.992	0.35*
		80.3	0.526*	0.7*	0.776	1.352	2.098	2.582	2.836	3.092	0.35*
		80.4	0.526*	0.7*	0.776	1.352	1.998	2.582	2.836	2.992	0.35*
		80.5	0.426*	0.6*	0.676	1.352	1.998	2.582	2.836	2.992	0.35*
		80.6	0.426*	0.7*	0.676	1.352	1.998	2.582	2.936	2.992	0.25*
		80.7	0.326*	0.7*	0.676	1.252	1.898	2.482	2.836	2.892	0.25*
		80.8	0.326*	0.6*	0.676	1.252	1.998	2.482	2.836	2.892	0.35*
		80.9	0.326*	0.6*	0.676	1.252	1.898	2.482	2.736	2.792	0.35*
		81	0.326*	0.6*	0.776	1.252	1.898	2.482	2.736	2.892	0.35*
		81.1	0.326*	0.6*	0.776	1.252	1.998	2.582	2.736	2.892	0.35*
		81.2	0.326*	0.6*	0.776	1.352	1.998	2.482	2.736	2.892	0.35*
		81.3	0.326*	0.6*	0.776	1.252	1.998	2.482	2.736	2.892	0.35*
		81.4	0.526*	0.7*	0.776	1.252	1.998	2.482	2.736	2.792	0.35*
		81.5	0.326*	0.7*	0.576	1.152	1.998	2.482	2.736	2.792	0.35*
		81.6	0.326*	0.6*	0.576	1.152	2.098	2.482	2.736	2.792	0.45*
		81.7	0.326*	0.6*	0.676	1.252	1.998	2.482	2.736	2.792	0.45*
		81.8	0.326*	0.6*	0.676	1.252	2.098	2.482	2.736	2.792	0.35*
		81.9	0.326*	0.6*	0.676	1.252	1.998	2.482	2.736	2.892	0.35*
		82	0.326*	0.6*	0.676	1.252	1.998	2.482	2.736	2.892	0.35*
		82.1	0.326*	0.6*	0.776	1.252	1.998	2.482	2.836	2.892	0.35*
		82.2	0.426*	0.6*	0.676	1.352	1.998	2.482	2.836	2.892	0.35*
		82.3	0.326*	0.5*	0.576	1.152	1.998	2.382	2.836	2.892	0.45*
		82.4	0.326*	0.5*	0.576	1.152	1.998	2.382	2.736	2.892	0.45*
		82.5	0.226*	0.5*	0.676	1.252	1.798	2.282	2.636	2.792	0.35*
		82.6	0.226*	0.6*	0.676	1.252	1.798	2.282	2.736	2.792	0.45*
		82.7	0.326*	0.6*	0.676	1.252	1.898	2.282	2.736	2.792	0.45*
		82.8	0.326*	0.6*	0.676	1.252	1.898	2.182	2.736	2.792	0.45*
		82.9	0.326*	0.6*	0.676	1.252	1.898	2.282	2.736	2.792	0.45*
		83	0.326*	0.6*	0.776	1.252	1.898	2.282	2.636	2.792	0.35*
		83.1	0.426*	0.6*	0.776	1.252	1.998	2.382	2.636	2.792	0.35*
		83.2	0.426*	0.6*	0.776	1.152	1.898	2.382	2.636	2.792	0.35*
		83.3	0.426*	0.6*	0.676	1.252	1.898	2.382	2.636	2.792	0.35*
		83.4	0.326*	0.4*	0.676	1.252	1.898	2.282	2.736	2.892	0.45*
		83.5	0.226*	0.4*	0.676	1.252	1.898	2.282	2.836	2.892	0.45*
		83.6	0.226*	0.4*	0.676	1.252	1.798	2.182	2.636	2.792	0.35*
		83.7	0.226*	0.5*	0.676	1.252	1.798	2.182	2.636	2.792	0.35*
		83.8	0.326*	0.6*	0.676	1.252	1.898	2.282	2.636	2.792	0.45*
		83.9	0.326*	0.6*	0.776	1.252	1.898	2.282	2.636	2.792	0.45*
		84	0.326*	0.6*	0.776	1.252	1.898	2.182	2.636	2.792	0.35*
		84.1	0.326*	0.6*	0.776	1.352	1.898	2.182	2.636	2.692	0.35*
		84.2	0.326*	0.6*	0.676	1.352	1.998	2.282	2.636	2.692	0.35*
		84.3	0.426*	0.6*	0.676	1.352	1.898	2.282	2.636	2.692	0.35*
		84.4	0.426*	0.5*	0.676	1.252	1.898	2.282	2.636	2.692	0.35*
		84.5	0.426*	0.5*	0.676	1.252	1.798	2.182	2.636	2.792	0.45*
		84.6	0.326*	0.4*	0.676	1.252	1.798	2.182	2.636	2.892	0.45*
		84.7	0.326*	0.5*	0.676	1.252	1.798	2.182	2.636	2.792	0.45*
		84.8	0.326*	0.6*	0.676	1.252	1.798	2.082	2.636	2.792	0.35*
		84.9	0.326*	0.6*	0.676	1.252	1.798	2.182	2.636	2.792	0.35*
		85	0.326*	0.6*	0.676	1.252	1.898	2.182	2.736	2.792	0.45*
		85.1	0.426*	0.6*	0.676	1.252	1.798	2.182	2.636	2.792	0.45*
		85.2	0.426*	0.6*	0.776	1.452	1.798	2.182	2.536	2.692	0.45*
		85.3	0.426*	0.5*	0.776	1.452	1.798	2.182	2.536	2.592	0.35*
		85.4	0.426*	0.5*	0.776	1.352	1.798	2.082	2.536	2.592	0.45*
		85.5	0.426*	0.5*	0.676	1.252	1.698	1.982	2.536	2.592	0.35*
		85.6	0.326*	0.4*	0.676	1.252	1.798	2.082	2.536	2.692	0.35*
		85.7	0.326*	0.5*	0.676	1.252	1.798	2.082	2.536	2.692	0.35*
		85.8	0.326*	0.5*	0.676	1.252	1.798	2.082	2.636	2.792	0.35*
		85.9	0.326*	0.5*	0.776	1.252	1.798	2.082	2.636	2.792	0.35*
		86	0.326*	0.5*	0.676	1.252	1.698	2.182	2.636	2.692	0.35*
		86.1	0.226*	0.5*	0.776	1.252	1.698	2.182	2.636	2.692	0.35*
		86.2	0.326*	0.6*	0.776	1.352	1.698	2.182	2.636	2.692	0.35*
		86.3	0.326*	0.5*	0.676	1.252	1.698	2.082	2.636	2.692	0.35*
		86.4	0.426*	0.5*	0.676	1.252	1.698	2.082	2.536	2.592	0.15*
		86.5	0.426*	0.5*	0.676	1.252	1.598	1.982	2.536	2.592	0.15*
		86.6	0.426*	0.5*	0.676	1.252	1.598	1.982	2.536	2.592	0.25*
		86.7	0.426*	0.6*	0.676	1.252	1.598	1.982	2.536	2.592	0.25*
		86.8	0.326*	0.5*	0.576	1.252	1.598	1.982	2.536	2.592	0.35*
		86.9	0.326*	0.5*	0.576	1.252	1.798	2.082	2.536	2.592	0.35*
		87	0.326*	0.5*	0.576	1.252	1.798	2.082	2.636	2.692	0.35*
		87.1	0.426*	0.6*	0.576	1.152	1.698	1.982	2.536	2.592	0.35*
		87.2	0.426*	0.5*	0.776	1.352	1.698	2.082	2.436	2.592	0.25*
		87.3	0.426*	0.5*	0.776	1.352	1.698	2.082	2.436	2.592	0.25*
		87.4	0.426*	0.5*	0.776	1.352	1.598	1.982	2.536	2.492	0.25*
		87.5	0.226*	0.4*	0.676	1.252	1.598	1.982	2.536	2.492	0.25*
		87.6	0.326*	0.4*	0.676	1.252	1.598	1.982	2.536	2.492	0.15*
		87.7	0.326*	0.4*	0.576	1.252	1.698	2.082	2.536	2.492	0.15*
		87.8	0.326*	0.5*	0.576	1.152	1.698	1.982	2.536	2.492	0.25*
		87.9	0.326*	0.5*	0.576	1.152	1.598	1.982	2.536	2.492	0.25*
		88	0.326*	0.5*	0.576	1.152	1.598	1.982	2.436	2.492	0.35*
		88.1	0.326*	0.5*	0.576	1.252	1.598	2.082	2.436	2.392	0.35*
		88.2	0.326*	0.4*	0.576	1.252	1.598	2.082	2.536	2.492	0.35*
		88.3	0.226*	0.3*	0.776	1.352	1.698	2.082	2.436	2.492	0.35*
		88.4	0.226*	0.3*	0.776	1.352	1.598	1.982	2.436	2.492	0.35*
		88.5	0.326*	0.4*	0.776	1.352	1.598	1.982	2.436	2.492	0.25*
		88.6	0.326*	0.4*	0.676	1.152	1.598	1.982	2.436	2.492	0.25*
		88.7	0.326*	0.4*	0.576	1.152	1.598	1.882	2.436	2.492	0.25*
		88.8	0.426*	0.5*	0.576	1.152	1.598	1.882	2.436	2.492	0.25*
		88.9	0.426*	0.5*	0.576	1.152	1.598	1.882	2.436	2.592	0.15*
		89	0.426*	0.5*	0.576	1.252	1.598	1.882	2.336	2.392	0.25*
		89.1	0.426*	0.5*	0.576	1.252	1.498	1.882	2.236	2.392	0.25*
		89.2	0.426*	0.5*	0.576	1.252	1.598	1.982	2.336	2.392	0.25*
		89.3	0.326*	0.4*	0.676	1.152	1.498	1.982	2.336	2.392	0.25*
		89.4	0.226*	0.4*	0.676	1.152	1.498	1.982	2.436	2.492	0.25*
		89.5	0.226*	0.4*	0.676	1.152	1.498	1.982	2.436	2.492	0.25*
		89.6	0.226*	0.3*	0.676	1.152	1.498	1.982	2.436	2.492	0.35*
		89.7	0.226*	0.3*	0.576	1.152	1.498	1.882	2.436	2.492	0.25*
		89.8	0.326*	0.5*	0.576	1.152	1.498	1.882	2.336	2.392	0.25*
		89.9	0.326*	0.5*	0.676	1.252	1.598	1.882	2.336	2.392	0.15*
		90	0.326*	0.5*	0.576	1.152	1.598	1.882	2.336	2.392	0.15*
		90.1	0.326*	0.5*	0.576	1.152	1.498	1.882	2.336	2.392	0.15*
		90.2	0.226*	0.4*	0.576	1.152	1.498	1.882	2.336	2.492	0.25*
		90.3	0.226*	0.4*	0.576	1.152	1.498	1.882	2.336	2.492	0.25*
		90.4	0.326*	0.4*	0.576	1.152	1.598	1.982	2.336	2.492	0.25*
		90.5	0.326*	0.4*	0.676	1.052	1.598	1.982	2.336	2.492	0.25*
		90.6	0.226*	0.4*	0.676	1.052	1.598	1.982	2.336	2.492	0.25*
		90.7	0.226*	0.4*	0.676	1.052	1.598	2.082	2.336	2.392	0.25*
		90.8	0.226*	0.4*	0.676	1.052	1.498	1.982	2.336	2.392	0.25*
		90.9	0.226*	0.4*	0.576	1.052	1.498	1.982	2.336	2.392	0.15*
		91	0.326*	0.5*	0.576	1.052	1.498	1.982	2.236	2.392	0.15*
		91.1	0.326*	0.5*	0.576	0.952	1.498	1.882	2.236	2.392	0.15*
		91.2	0.326*	0.5*	0.576	1.052	1.598	1.882	2.236	2.392	0.15*
		91.3	0.326*	0.5*	0.576	1.052	1.598	1.882	2.236	2.392	0.35*
		91.4	0.226*	0.4*	0.676	1.052	1.498	1.882	2.236	2.392	0.35*
		91.5	0.326*	0.4*	0.776	1.152	1.498	1.882	2.236	2.392	0.35*
		91.6	0.326*	0.4*	0.776	1.152	1.498	1.982	2.236	2.392	0.25*
		91.7	0.326*	0.4*	0.776	1.152	1.498	1.982	2.136	2.392	0.25*
		91.8	0.326*	0.4*	0.776	1.152	1.498	1.982	2.236	2.392	0.25*
		91.9	0.226*	0.4*	0.776	1.052	1.498	1.982	2.236	2.392	0.25*
		92	0.226*	0.4*	0.676	0.952	1.498	1.982	2.236	2.392	0.25*
		92.1	0.226*	0.4*	0.576	0.952	1.598	2.082	2.236	2.392	0.25*
		92.2	0.226*	0.4*	0.576	0.952	1.598	2.082	2.136	2.292	0.25*
		92.3	0.226*	0.3*	0.576	0.952	1.498	1.882	2.136	2.192	0.25*
		92.4	0.226*	0.4*	0.576	0.952	1.498	1.882	2.036	2.192	0.15*
		92.5	0.226*	0.4*	0.576	0.952	1.498	1.882	2.036	2.192	0.15*
		92.6	0.326*	0.4*	0.676	1.052	1.498	1.882	2.036	2.192	0.25*
		92.7	0.426*	0.5*	0.676	1.052	1.498	1.882	2.136	2.192	0.25*
		92.8	0.426*	0.5*	0.676	1.052	1.498	1.882	2.136	2.192	0.25*
		92.9	0.326*	0.4*	0.676	0.952	1.498	1.882	2.236	2.292	0.35*
		93	0.226*	0.4*	0.676	0.952	1.498	1.782	2.236	2.192	0.35*
		93.1	0.226*	0.4*	0.576	0.952	1.498	1.882	2.136	2.192	0.35*
		93.2	0.226*	0.4*	0.576	0.952	1.498	1.882	2.136	2.192	0.25*
		93.3	0.226*	0.4*	0.476	0.852	1.598	1.982	2.136	2.192	0.25*
		93.4	0.226*	0.3*	0.576	0.952	1.498	1.982	2.136	2.292	0.25*
		93.5	0.326*	0.3*	0.676	0.952	1.498	1.982	2.036	2.192	0.25*
		93.6	0.226*	0.3*	0.676	0.952	1.398	1.882	2.036	2.192	0.25*
		93.7	0.226*	0.3*	0.676	1.052	1.398	1.882	2.036	2.092	0.25*
		93.8	0.326*	0.4*	0.676	1.052	1.398	1.882	2.036	2.092	0.15*
		93.9	0.326*	0.5*	0.676	1.052	1.398	1.782	1.936	2.092	0.15*
		94	0.326*	0.5*	0.676	1.052	1.398	1.782	1.936	2.092	0.15*
		94.1	0.326*	0.5*	0.676	1.052	1.398	1.782	1.936	2.092	0.15*
		94.2	0.326*	0.5*	0.576	1.052	1.398	1.782	1.936	2.092	0.25*
		94.3	0.326*	0.4*	0.576	1.052	1.498	1.882	2.036	2.092	0.25*
		94.4	0.226*	0.3*	0.676	0.952	1.598	1.882	2.136	2.192	0.25*
		94.5	0.326*	0.3*	0.676	0.952	1.598	1.882	2.136	2.192	0.35*
		94.6	0.226*	0.3*	0.576	0.852	1.498	1.882	2.136	2.092	0.35*
		94.7	0.226*	0.3*	0.676	0.952	1.498	1.882	2.136	2.092	0.35*
		94.8	0.226*	0.3*	0.676	1.052	1.498	1.882	2.036	1.992	0.35*
		94.9	0.226*	0.3*	0.676	1.052	1.398	1.782	2.036	1.992	0.35*
		95	0.326*	0.4*	0.676	1.052	1.398	1.782	1.936	2.092	0.35*
		95.1	0.326*	0.5*	0.676	1.052	1.398	1.782	1.936	2.092	0.35*
		95.2	0.326*	0.5*	0.676	1.052	1.398	1.682	1.936	2.092	0.25*
		95.3	0.326*	0.5*	0.676	1.052	1.398	1.682	1.936	2.092	0.25*
		95.4	0.326*	0.5*	0.776	1.052	1.398	1.782	1.936	2.092	0.25*
		95.5	0.426*	0.5*	0.676	1.052	1.398	1.782	1.936	1.992	0.15*
		95.6	0.426*	0.5*	0.676	1.052	1.398	1.882	1.936	1.992	0.15*
		95.7	0.326*	0.5*	0.576	0.952	1.498	1.882	2.036	1.992	0.15*
		95.8	0.226*	0.3*	0.676	1.152	1.398	1.782	2.036	1.992	0.25*
		95.9	0.226*	0.3*	0.676	1.152	1.398	1.782	1.836	1.892	0.35*
		96	0.226*	0.3*	0.676	1.152	1.398	1.782	1.936	1.992	0.35*
		96.1	0.226*	0.3*	0.676	1.152	1.398	1.682	1.936	1.992	0.35*
		96.2	0.326*	0.4*	0.676	1.052	1.398	1.682	1.936	1.992	0.35*
		96.3	0.326*	0.5*	0.776	1.052	1.398	1.682	1.936	1.992	0.25*
		96.4	0.326*	0.5*	0.776	1.052	1.298	1.682	1.936	2.092	0.25*
		96.5	0.426*	0.5*	0.776	1.052	1.298	1.682	1.936	1.992	0.25*
		96.6	0.426*	0.5*	0.776	1.052	1.398	1.682	1.936	1.992	0.25*
		96.7	0.326*	0.4*	0.676	1.052	1.398	1.682	1.936	1.992	0.25*
		96.8	0.326*	0.4*	0.576	0.952	1.398	1.682	1.836	1.992	0.15*
		96.9	0.326*	0.4*	0.576	1.052	1.298	1.582	1.836	1.992	0.15*
		97	0.326*	0.4*	0.576	1.052	1.398	1.782	1.936	1.992	0.15*
		97.1	0.326*	0.4*	0.576	1.052	1.398	1.682	1.936	1.992	0.15*
		97.2	0.326*	0.4*	0.576	1.052	1.398	1.682	1.936	1.992	0.15*
		97.3	0.226*	0.4*	0.676	0.952	1.398	1.682	1.836	1.892	0.15*
		97.4	0.226*	0.4*	0.676	0.952	1.398	1.682	1.836	1.892	0.05*
		97.5	0.226*	0.4*	0.676	0.952	1.398	1.682	1.936	1.992	0.15*
		97.6	0.326*	0.6*	0.676	0.952	1.398	1.682	1.936	2.092	0.15*
		97.7	0.326*	0.6*	0.576	0.952	1.298	1.582	1.936	2.092	0.25*
		97.8	0.226*	0.5*	0.676	1.052	1.298	1.582	1.836	1.992	0.15*
		97.9	0.226*	0.5*	0.676	1.052	1.298	1.582	1.836	1.992	0.15*
		98	0.226*	0.5*	0.576	0.952	1.298	1.582	1.836	1.992	0.15*
		98.1	0.326*	0.5*	0.576	0.952	1.298	1.582	1.836	1.992	0.15*
		98.2	0.326*	0.5*	0.576	1.052	1.298	1.682	1.836	1.992	0.15*
		98.3	0.326*	0.5*	0.676	1.052	1.298	1.682	1.836	1.992	0.15*
		98.4	0.326*	0.5*	0.676	1.052	1.298	1.682	1.836	1.992	0.15*
		98.5	0.326*	0.5*	0.676	1.052	1.298	1.682	1.836	1.992	0.15*
		98.6	0.326*	0.4*	0.676	1.052	1.198	1.482	1.836	1.892	0.15*
		98.7	0.326*	0.4*	0.676	0.952	1.198	1.482	1.736	1.992	0.15*
		98.8	0.226*	0.4*	0.676	0.952	1.198	1.482	1.736	1.992	0.15*
		98.9	0.226*	0.4*	0.576	0.952	1.298	1.582	1.736	1.992	0.25*
		99	0.226*	0.4*	0.576	0.952	1.298	1.582	1.736	1.992	0.25*
		99.1	0.226*	0.5*	0.576	0.952	1.298	1.582	1.736	1.992	0.15*
		99.2	0.226*	0.5*	0.676	0.952	1.298	1.582	1.836	1.992	0.15*
		99.3	0.226*	0.5*	0.576	0.852	1.198	1.682	1.836	1.992	0.05*
		99.4	0.226*	0.4*	0.676	1.052	1.198	1.682	1.836	1.992	0.05*
		99.5	0.226*	0.4*	0.676	1.052	1.198	1.682	1.836	1.992	0.15*
		99.6	0.226*	0.4*	0.676	1.052	1.298	1.682	1.736	1.992	0.15*
		99.7	0.326*	0.5*	0.676	1.052	1.298	1.682	1.736	1.992	0.15*
		99.8	0.326*	0.5*	0.676	1.052	1.298	1.682	1.736	1.892	0.15*
		99.9	0.326*	0.5*	0.676	1.052	1.198	1.482	1.736	1.892	0.15*
		100	0.326*	0.5*	0.676	0.952	1.198	1.482	1.736	1.992	0.15*
		100.1	0.326*	0.5*	0.576	0.952	1.098	1.482	1.736	1.992	0.15*
		100.2	0.326*	0.5*	0.576	0.952	1.098	1.482	1.736	1.992	0.25*
		100.3	0.326*	0.5*	0.576	0.952	1.098	1.482	1.736	1.992	0.15*
		100.4	0.326*	0.4*	0.676	0.952	1.098	1.482	1.736	1.992	0.15*
		100.5	0.326*	0.4*	0.676	0.952	1.198	1.582	1.636	1.992	0.15*
		100.6	0.126*	0.3*	0.676	1.052	1.198	1.582	1.636	1.992	0.25*
		100.7	0.126*	0.3*	0.676	1.052	1.198	1.582	1.636	1.992	0.25*
		100.8	0.126*	0.3*	0.676	1.052	1.198	1.582	1.736	1.992	0.15*
		100.9	0.126*	0.3*	0.576	0.952	1.198	1.582	1.736	1.892	0.15*
		101	0.126*	0.3*	0.576	0.952	1.098	1.482	1.736	1.892	0.15*
		101.1	0.126*	0.3*	0.476	0.852	1.198	1.482	1.736	1.892	0.15*
		101.2	0.226*	0.4*	0.476	0.852	1.098	1.482	1.736	1.892	0.15*
		101.3	0.226*	0.5*	0.476	0.852	1.098	1.482	1.736	1.892	0.15*
		101.4	0.226*	0.5*	0.576	0.852	1.098	1.482	1.736	1.892	0.15*
		101.5	0.326*	0.5*	0.576	0.852	1.098	1.482	1.636	1.792	0.15*
		101.6	0.326*	0.5*	0.576	0.952	1.098	1.482	1.636	1.792	0.15*
		101.7	0.326*	0.5*	0.576	0.952	1.198	1.582	1.636	1.892	0.15*
		101.8	0.326*	0.4*	0.676	1.052	1.198	1.582	1.636	1.892	0.15*
		101.9	0.326*	0.4*	0.676	1.052	1.198	1.582	1.736	1.992	0.05*
		102	0.326*	0.4*	0.676	1.052	1.198	1.582	1.636	1.892	0.05*
		102.1	0.326*	0.4*	0.676	1.052	1.198	1.582	1.636	1.892	0.15*
		102.2	0.326*	0.4*	0.676	1.052	1.198	1.482	1.636	1.892	0.25*
		102.3	0.326*	0.4*	0.676	1.052	1.098	1.482	1.636	1.892	0.25*
		102.4	0.326*	0.4*	0.676	1.052	1.098	1.482	1.736	1.892	0.25*
		102.5	0.226*	0.4*	0.676	1.052	1.198	1.582	1.636	1.792	0.25*
		102.6	0.126*	0.3*	0.676	0.952	1.198	1.582	1.636	1.792	0.15*
		102.7	0.126*	0.3*	0.676	1.052	1.198	1.582	1.636	1.792	0.15*
		102.8	0.126*	0.2*	0.676	1.052	1.198	1.582	1.636	1.792	0.15*
		102.9	0.126*	0.2*	0.576	1.052	1.198	1.582	1.636	1.792	0.15*
		103	0.126*	0.2*	0.576	1.052	1.098	1.382	1.636	1.792	0.15*
		103.1	0.126*	0.3*	0.476	0.952	1.098	1.382	1.636	1.792	0.25*
		103.2	0.226*	0.4*	0.476	0.952	0.998	1.382	1.636	1.792	0.35*
		103.3	0.226*	0.4*	0.476	0.952	0.998	1.382	1.636	1.792	0.35*
		103.4	0.226*	0.4*	0.476	0.952	1.098	1.482	1.536	1.792	0.35*
		103.5	0.226*	0.4*	0.576	0.852	1.098	1.482	1.536	1.792	0.25*
		103.6	0.226*	0.4*	0.576	0.852	1.098	1.482	1.636	1.792	0.25*
		103.7	0.126*	0.3*	0.576	0.852	1.098	1.482	1.636	1.792	0.25*
		103.8	0.226*	0.3*	0.576	0.952	1.198	1.482	1.636	1.792	0.15*
		103.9	0.226*	0.3*	0.576	0.952	1.198	1.482	1.636	1.792	0.15*
		104	0.226*	0.3*	0.576	0.952	1.198	1.482	1.536	1.692	0.15*
		104.1	0.126*	0.3*	0.576	0.952	1.198	1.482	1.536	1.592	0.15*
		104.2	0.126*	0.2*	0.576	0.952	1.198	1.382	1.536	1.592	0.15*
		104.3	0.126*	0.3*	0.576	0.952	1.198	1.382	1.536	1.592	0.15*
		104.4	0.126*	0.3*	0.676	1.052	1.098	1.282	1.536	1.592	0.15*
		104.5	0.126*	0.3*	0.676	1.052	1.098	1.382	1.536	1.592	0.15*
		104.6	0.126*	0.3*	0.676	1.052	1.198	1.482	1.636	1.592	0.25*
		104.7	0.126*	0.3*	0.676	1.052	1.098	1.482	1.636	1.592	0.25*
		104.8	0.226*	0.4*	0.676	1.052	1.098	1.482	1.636	1.592	0.15*
		104.9	0.226*	0.4*	0.576	1.052	1.098	1.482	1.636	1.592	0.25*
		105	0.226*	0.4*	0.576	1.052	1.098	1.482	1.536	1.492	0.25*
		105.1	0.226*	0.4*	0.576	1.052	1.098	1.382	1.536	1.492	0.25*
		105.2	0.226*	0.4*	0.576	1.052	1.098	1.382	1.536	1.592	0.25*
		105.3	0.326*	0.4*	0.576	1.052	1.098	1.382	1.536	1.592	0.25*
		105.4	0.326*	0.4*	0.676	1.052	1.198	1.382	1.536	1.592	0.25*
		105.5	0.326*	0.4*	0.676	1.052	1.198	1.382	1.536	1.592	0.15*
		105.6	0.226*	0.3*	0.576	0.952	1.198	1.382	1.636	1.692	0.15*
		105.7	0.126*	0.3*	0.576	0.952	1.098	1.282	1.536	1.592	0.15*
		105.8	0.126*	0.4*	0.576	0.952	1.098	1.282	1.536	1.492	0.15*
		105.9	0.126*	0.3*	0.576	0.952	0.998	1.282	1.536	1.492	0.25*
		106	0.126*	0.3*	0.576	0.952	0.998	1.282	1.636	1.492	0.25*
		106.1	0.126*	0.3*	0.576	0.952	0.998	1.382	1.636	1.492	0.25*
		106.2	0.126*	0.3*	0.576	0.952	0.998	1.382	1.636	1.492	0.25*
		106.3	0.226*	0.4*	0.576	0.952	0.998	1.382	1.636	1.492	0.25*
		106.4	0.326*	0.4*	0.676	1.052	0.998	1.382	1.536	1.592	0.25*
		106.5	0.326*	0.4*	0.676	1.052	0.998	1.382	1.536	1.592	0.25*
		106.6	0.226*	0.3*	0.676	1.052	0.998	1.382	1.536	1.592	0.25*
		106.7	0.226*	0.3*	0.676	1.052	1.098	1.382	1.536	1.592	0.15*
		106.8	0.226*	0.3*	0.676	1.052	1.098	1.382	1.436	1.392	0.15*
		106.9	0.226*	0.3*	0.676	1.052	1.098	1.382	1.436	1.392	0.15*
		107	0.226*	0.3*	0.676	1.052	1.098	1.382	1.436	1.392	0.15*
		107.1	0.226*	0.3*	0.676	1.052	1.098	1.382	1.536	1.392	0.15*
		107.2	0.226*	0.3*	0.776	1.052	1.098	1.382	1.536	1.392	0.25*
		107.3	0.226*	0.4*	0.776	1.052	1.098	1.382	1.536	1.492	0.25*
		107.4	0.126*	0.4*	0.776	1.052	1.098	1.382	1.536	1.492	0.25*
		107.5	0.126*	0.4*	0.676	1.052	1.098	1.382	1.536	1.492	0.25*
		107.6	0.126*	0.3*	0.576	0.952	0.998	1.382	1.536	1.492	0.35*
		107.7	0.226*	0.3*	0.576	0.952	1.098	1.382	1.536	1.392	0.35*
		107.8	0.126*	0.2*	0.576	0.952	0.998	1.282	1.536	1.392	0.25*
		107.9	0.126*	0.2*	0.576	0.952	0.998	1.182	1.436	1.292	0.25*
		108	0.126*	0.2*	0.576	0.952	0.998	1.282	1.436	1.292	0.25*
		108.1	0.126*	0.2*	0.576	0.952	0.998	1.282	1.436	1.292	0.25*
		108.2	0.126*	0.2*	0.576	0.852	0.998	1.282	1.336	1.292	0.25*
		108.3	0.226*	0.3*	0.576	0.852	0.998	1.282	1.336	1.392	0.25*
		108.4	0.226*	0.3*	0.676	0.952	0.998	1.282	1.336	1.392	0.25*
		108.5	0.226*	0.3*	0.676	0.952	0.998	1.282	1.336	1.392	0.25*
		108.6	0.226*	0.3*	0.576	0.852	1.098	1.382	1.336	1.392	0.25*
		108.7	0.326*	0.3*	0.576	0.852	1.098	1.382	1.436	1.492	0.15*
		108.8	0.226*	0.3*	0.576	0.852	1.098	1.382	1.536	1.492	0.15*
		108.9	0.226*	0.3*	0.576	0.852	0.998	1.382	1.436	1.392	0.15*
		109	0.226*	0.3*	0.576	0.852	0.998	1.282	1.436	1.392	0.15*
		109.1	0.226*	0.3*	0.576	0.852	0.998	1.282	1.436	1.392	0.25*
		109.2	0.226*	0.2*	0.676	0.852	0.898	1.182	1.436	1.392	0.25*
		109.3	0.226*	0.2*	0.676	0.852	0.898	1.182	1.436	1.392	0.25*
		109.4	0.226*	0.3*	0.576	0.852	0.998	1.182	1.436	1.392	0.25*
		109.5	0.226*	0.3*	0.576	0.852	0.998	1.182	1.436	1.392	0.25*
		109.6	0.226*	0.3*	0.576	0.852	0.998	1.182	1.436	1.392	0.25*
		109.7	0.226*	0.3*	0.576	0.852	0.998	1.182	1.336	1.292	0.25*
		109.8	0.226*	0.3*	0.576	0.852	0.898	1.182	1.336	1.292	0.25*
		109.9	0.226*	0.3*	0.676	0.952	0.898	1.182	1.236	1.292	0.15*
		110	0.126*	0.2*	0.676	0.952	0.898	1.182	1.236	1.292	0.15*
		110.1	0.126*	0.2*	0.576	0.852	0.898	1.182	1.236	1.192	0.15*
		110.2	0.126*	0.2*	0.576	0.752	0.898	1.182	1.236	1.292	0.15*
		110.3	0.026*	0.2*	0.576	0.752	0.898	1.182	1.236	1.292	0.15*
		110.4	0.126*	0.3*	0.576	0.752	0.898	1.082	1.336	1.292	0.15*
		110.5	0.126*	0.2*	0.476	0.752	0.898	1.182	1.436	1.392	0.15*
		110.6	0.126*	0.2*	0.476	0.752	0.898	1.182	1.436	1.392	0.15*
		110.7	0.126*	0.3*	0.476	0.752	0.898	1.182	1.436	1.392	0.25*
		110.8	0.226*	0.3*	0.476	0.852	0.998	1.282	1.436	1.392	0.35*
		110.9	0.226*	0.3*	0.476	0.852	0.998	1.282	1.436	1.392	0.35*
		111	0.226*	0.3*	0.476	0.852	1.098	1.282	1.436	1.392	0.35*
		111.1	0.226*	0.3*	0.476	0.852	0.998	1.282	1.436	1.392	0.35*
		111.2	0.226*	0.3*	0.476	0.852	0.998	1.182	1.336	1.392	0.35*
		111.3	0.226*	0.3*	0.476	0.752	0.898	1.082	1.336	1.392	0.35*
		111.4	0.226*	0.3*	0.376	0.652	0.898	1.082	1.336	1.392	0.25*
		111.5	0.226*	0.3*	0.476	0.652	0.898	1.082	1.336	1.292	0.25*
		111.6	0.226*	0.3*	0.476	0.652	0.898	1.082	1.236	1.192	0.15*
		111.7	0.226*	0.3*	0.376	0.652	0.898	1.082	1.236	1.192	0.15*
		111.8	0.226*	0.3*	0.376	0.652	0.898	1.182	1.236	1.292	0.15*
		111.9	0.226*	0.3*	0.476	0.752	0.898	1.182	1.236	1.292	0.15*
		112	0.126*	0.2*	0.476	0.852	0.898	1.182	1.236	1.292	0.15*
		112.1	0.126*	0.2*	0.476	0.852	0.898	1.182	1.236	1.292	0.15*
		112.2	0.126*	0.3*	0.476	0.852	0.898	1.182	1.236	1.292	0.15*
		112.3	0.126*	0.3*	0.476	0.852	0.898	1.182	1.236	1.292	0.15*
		112.4	0.126*	0.3*	0.476	0.852	0.998	1.182	1.236	1.292	0.25*
		112.5	0.126*	0.3*	0.476	0.852	0.998	1.182	1.236	1.292	0.25*
		112.6	0.126*	0.3*	0.476	0.852	0.898	1.182	1.236	1.292	0.25*
		112.7	0.126*	0.2*	0.376	0.752	0.998	1.282	1.336	1.392	0.25*
		112.8	0.226*	0.3*	0.276	0.652	0.898	1.182	1.336	1.392	0.25*
		112.9	0.226*	0.3*	0.276	0.652	0.898	1.182	1.336	1.392	0.25*
		113	0.226*	0.3*	0.276	0.652	0.898	1.182	1.336	1.392	0.25*
		113.1	0.226*	0.3*	0.276	0.652	0.898	1.182	1.336	1.292	0.25*
		113.2	0.226*	0.3*	0.276	0.652	0.898	1.082	1.336	1.292	0.25*
		113.3	0.226*	0.3*	0.276	0.652	0.898	1.082	1.336	1.292	0.25*
		113.4	0.226*	0.3*	0.276	0.652	0.898	1.082	1.236	1.292	0.25*
		113.5	0.126*	0.2*	0.276	0.752	0.898	1.082	1.136	1.192	0.15*
		113.6	0.126*	0.2*	0.276	0.752	0.998	1.082	1.136	1.192	0.15*
		113.7	0.126*	0.2*	0.276	0.752	0.998	1.082	1.136	1.192	0.15*
		113.8	0.126*	0.2*	0.276	0.752	0.998	1.182	1.236	1.192	0.15*
		113.9	0.226*	0.2*	0.376	0.752	0.998	1.182	1.236	1.192	0.15*
		114	0.226*	0.2*	0.376	0.752	0.998	1.182	1.236	1.292	0.15*
		114.1	0.226*	0.2*	0.476	0.852	0.998	1.182	1.236	1.292	0.15*
		114.2	0.326*	0.3*	0.476	0.852	0.898	1.082	1.236	1.292	0.15*
		114.3	0.326*	0.3*	0.376	0.752	0.998	1.182	1.236	1.292	0.25*
		114.4	0.326*	0.3*	0.376	0.752	0.998	1.182	1.236	1.292	0.25*
		114.5	0.326*	0.3*	0.376	0.752	0.998	1.182	1.236	1.292	0.25*
		114.6	0.126*	0.3*	0.276	0.652	0.998	1.182	1.236	1.292	0.25*
		114.7	0.126*	0.3*	0.276	0.652	0.898	1.082	1.236	1.292	0.25*
		114.8	0.126*	0.2*	0.276	0.652	0.898	1.082	1.236	1.292	0.25*
		114.9	0.126*	0.2*	0.276	0.652	0.898	1.082	1.236	1.292	0.15*
		115	0.126*	0.2*	0.276	0.752	0.898	1.082	1.236	1.192	0.15*
		115.1	0.126*	0.2*	0.276	0.752	0.898	1.082	1.236	1.192	0.15*
		115.2	0.226*	0.2*	0.276	0.752	0.998	1.082	1.236	1.192	0.05*
		115.3	0.226*	0.2*	0.276	0.752	0.998	1.082	1.136	1.192	0.05*
		115.4	0.326*	0.3*	0.276	0.752	0.998	1.082	1.136	1.192	0.05*
		115.5	0.326*	0.3*	0.276	0.652	0.998	0.982	1.136	1.192	0.05*
		115.6	0.326*	0.3*	0.376	0.652	0.998	0.982	1.136	1.192	0.05*
		115.7	0.226*	0.2*	0.276	0.652	0.998	0.982	1.136	1.192	0.15*
		115.8	0.226*	0.2*	0.276	0.652	0.898	0.982	1.136	1.092	0.15*
		115.9	0.226*	0.3*	0.276	0.652	0.898	0.982	1.136	1.192	0.25*
		116	0.226*	0.3*	0.276	0.652	0.898	0.982	1.136	1.192	0.25*
		116.1	0.226*	0.3*	0.276	0.652	0.898	1.082	1.236	1.292	0.25*
		116.2	0.226*	0.2*	0.276	0.652	0.898	1.082	1.236	1.292	0.25*
		116.3	0.226*	0.2*	0.276	0.652	0.898	1.082	1.236	1.292	0.25*
		116.4	0.226*	0.2*	0.276	0.752	0.898	1.082	1.136	1.292	0.25*
		116.5	0.226*	0.2*	0.176	0.652	0.898	1.082	1.136	1.292	0.25*
		116.6	0.126*	0.2*	0.176	0.652	0.798	1.082	1.236	1.292	0.25*
		116.7	0.226*	0.2*	0.276	0.752	0.698	0.982	1.136	1.192	0.25*
		116.8	0.126*	0.1*	0.276	0.652	0.698	0.982	1.136	1.192	0.15*
		116.9	0.126*	0.1*	0.276	0.652	0.798	0.882	1.136	1.192	0.15*
		117	0.126*	0*	0.276	0.652	0.798	0.882	1.136	1.192	0.15*
		117.1	0.126*	0*	0.276	0.652	0.798	0.882	1.136	1.192	0.15*
		117.2	0.126*	0*	0.276	0.652	0.798	0.882	1.036	1.092	0.15*
		117.3	0.226*	0.2*	0.276	0.652	0.798	0.882	1.036	1.092	0.15*
		117.4	0.226*	0.2*	0.276	0.652	0.798	0.882	1.036	1.092	0.15*
		117.5	0.226*	0.2*	0.376	0.652	0.798	0.882	1.036	1.092	0.15*
		117.6	0.226*	0.2*	0.376	0.652	0.798	0.982	1.036	1.092	0.25*
		117.7	0.226*	0.2*	0.376	0.652	0.798	0.982	1.036	1.092	0.25*
		117.8	0.226*	0.2*	0.376	0.652	0.798	0.982	1.236	1.292	0.25*
		117.9	0.226*	0.2*	0.376	0.652	0.698	0.982	1.236	1.292	0.15*
		118	0.226*	0.1*	0.376	0.652	0.698	0.982	1.236	1.292	0.15*
		118.1	0.226*	0.1*	0.276	0.652	0.798	0.982	1.236	1.192	0.15*
		118.2	0.226*	0.1*	0.276	0.652	0.798	0.982	1.236	1.192	0.15*
		118.3	0.126*	0.2*	0.276	0.652	0.798	0.982	1.236	1.192	0.15*
		118.4	0.126*	0.2*	0.276	0.652	0.698	0.882	1.136	1.192	0.05*
		118.5	0.026*	0.1*	0.276	0.552	0.698	0.882	1.136	1.192	0.05*
		118.6	0.026*	0.1*	0.276	0.652	0.698	0.882	1.136	1.192	0.15*
		118.7	0.026*	0.1*	0.276	0.652	0.698	0.882	1.136	1.192	0.15*
		118.8	0.126*	0.2*	0.276	0.652	0.698	0.882	1.136	1.192	0.15*
		118.9	0.126*	0.2*	0.276	0.652	0.698	0.882	1.236	1.192	0.15*
		119	0.126*	0.2*	0.276	0.652	0.698	0.882	1.236	1.192	0.15*
		119.1	0.126*	0.2*	0.276	0.652	0.698	0.882	1.236	1.192	0.15*
		119.2	0.126*	0.2*	0.276	0.652	0.598	0.982	1.136	1.092	0.15*
		119.3	0.226*	0.2*	0.276	0.652	0.698	0.982	1.136	1.192	0.25*
		119.4	0.226*	0.2*	0.276	0.652	0.698	0.982	1.136	1.192	0.25*
		119.5	0.226*	0.2*	0.276	0.652	0.698	0.982	1.136	1.192	0.25*
		119.6	0.226*	0.2*	0.276	0.652	0.698	0.982	1.136	1.192	0.25*
		119.7	0.226*	0.2*	0.376	0.652	0.698	0.982	1.036	1.092	0.25*
		119.8	0.226*	0.1*	0.376	0.652	0.698	0.982	1.036	1.092	0.25*
		119.9	0.226*	0.1*	0.376	0.652	0.698	0.882	1.036	1.092	0.15*
		120	0.226*	0.2*	0.476	0.752	0.698	0.982	1.036	1.092	0.25*
		120.1	0.226*	0.2*	0.376	0.652	0.698	0.982	1.036	1.092	0.25*
		120.2	0.226*	0.2*	0.376	0.652	0.698	0.982	0.936	0.992	0.25*
		120.3	0.226*	0.2*	0.376	0.652	0.598	0.882	0.936	0.992	0.25*
		120.4	0.226*	0.2*	0.376	0.652	0.598	0.882	0.936	0.992	0.25*
		120.5	0.226*	0.2*	0.376	0.652	0.498	0.882	0.936	0.992	0.25*
		120.6	0.126*	0.2*	0.276	0.652	0.498	0.882	1.036	0.892	0.25*
		120.7	0.126*	0.2*	0.276	0.752	0.498	0.882	1.036	0.892	0.15*
		120.8	0.226*	0.3*	0.276	0.752	0.498	0.882	1.036	0.992	0.15*
		120.9	0.126*	0.2*	0.276	0.752	0.598	0.982	1.036	0.992	0.15*
		121	0.126*	0.2*	0.276	0.752	0.598	0.982	1.036	0.992	0.15*
		121.1	0.126*	0.2*	0.276	0.752	0.598	0.982	1.036	0.992	0.05*
		121.2	0.126*	0.2*	0.376	0.752	0.598	0.982	1.136	1.092	0.05*
		121.3	0.126*	0.2*	0.376	0.752	0.698	0.982	1.136	1.092	0.05*
		121.4	0.126*	0.2*	0.376	0.752	0.698	0.982	1.136	1.092	0.05*
		121.5	0.226*	0.2*	0.376	0.752	0.698	0.982	1.036	1.092	0.15*
		121.6	0.226*	0.2*	0.376	0.652	0.698	0.982	1.036	0.992	0.15*
		121.7	0.226*	0.2*	0.376	0.652	0.698	0.982	0.936	0.892	0.15*
		121.8	0.226*	0.2*	0.376	0.652	0.598	0.882	0.936	0.892	0.15*
		121.9	0.226*	0.3*	0.276	0.652	0.598	0.882	1.036	0.892	0.15*
		122	0.226*	0.3*	0.276	0.652	0.698	0.982	1.036	0.892	0.15*
		122.1	0.326*	0.4*	0.276	0.652	0.598	0.982	1.036	0.892	0.15*
		122.2	0.226*	0.4*	0.276	0.652	0.598	0.982	1.036	0.992	0.15*
		122.3	0.226*	0.4*	0.276	0.652	0.598	0.982	1.036	0.992	0.25*
		122.4	0.226*	0.3*	0.276	0.652	0.598	0.982	1.036	0.992	0.25*
		122.5	0.226*	0.3*	0.276	0.652	0.598	0.982	1.036	0.992	0.15*
		122.6	0.126*	0.2*	0.176	0.652	0.598	0.982	1.036	0.992	0.05*
		122.7	0.126*	0.2*	0.176	0.652	0.598	0.982	1.036	0.892	0.05*
		122.8	0.126*	0.2*	0.276	0.752	0.598	0.882	1.036	0.892	0.05*
		122.9	0.126*	0.2*	0.276	0.752	0.598	0.882	1.036	0.892	0.05*
		123	0.126*	0.2*	0.276	0.652	0.698	0.982	1.036	0.892	0.15*
		123.1	0.126*	0.2*	0.276	0.652	0.698	0.982	0.936	0.792	0.15*
		123.2	0.126*	0.2*	0.176	0.652	0.698	0.882	0.836	0.792	0.15*
		123.3	0.126*	0.2*	0.176	0.652	0.698	0.882	0.836	0.792	0.15*
		123.4	0.226*	0.2*	0.176	0.652	0.598	0.882	0.836	0.792	0.15*
		123.5	0.226*	0.2*	0.176	0.652	0.598	0.882	0.836	0.792	0.15*
		123.6	0.226*	0.2*	0.176	0.652	0.598	0.882	0.936	0.892	0.15*
		123.7	0.226*	0.3*	0.176	0.652	0.598	0.882	0.936	0.892	0.15*
		123.8	0.326*	0.4*	0.276	0.752	0.598	0.882	0.936	0.892	0.15*
		123.9	0.326*	0.4*	0.276	0.752	0.598	0.882	0.936	0.892	0.25*
		124	0.226*	0.3*	0.276	0.652	0.598	0.882	0.936	0.892	0.25*
		124.1	0.226*	0.2*	0.276	0.652	0.598	0.882	1.036	0.892	0.25*
		124.2	0.226*	0.2*	0.276	0.652	0.698	0.882	1.036	0.892	0.25*
		124.3	0.126*	0.2*	0.276	0.652	0.698	0.882	1.036	0.892	0.25*
		124.4	0.126*	0.2*	0.276	0.652	0.698	0.882	0.936	0.892	0.25*
		124.5	0.126*	0.2*	0.276	0.652	0.698	0.882	0.836	0.792	0.35*
		124.6	0.126*	0.2*	0.276	0.652	0.598	0.782	0.836	0.792	0.35*
		124.7	0.126*	0.2*	0.276	0.652	0.598	0.782	0.836	0.792	0.35*
		124.8	0.126*	0.2*	0.176	0.552	0.598	0.782	0.936	0.892	0.35*
		124.9	0.126*	0.2*	0.176	0.552	0.698	0.882	0.936	0.892	0.25*
		125	0.126*	0.2*	0.076	0.652	0.698	0.782	0.936	0.892	0.15*
		125.1	0.126*	0.2*	0.176	0.652	0.698	0.782	0.936	0.892	0.15*
		125.2	0.126*	0.2*	0.176	0.552	0.698	0.782	0.936	0.892	0.15*
		125.3	0.126*	0.2*	0.176	0.552	0.698	0.782	0.936	0.892	0.15*
		125.4	0.126*	0.1*	0.276	0.652	0.698	0.782	0.936	0.992	0.25*
		125.5	0.126*	0.1*	0.276	0.652	0.798	0.882	0.936	0.992	0.25*
		125.6	0.126*	0.1*	0.276	0.652	0.798	0.882	0.936	0.892	0.25*
		125.7	0.226*	0.2*	0.276	0.652	0.798	0.882	0.936	0.892	0.25*
		125.8	0.226*	0.3*	0.276	0.652	0.798	0.882	0.836	0.892	0.25*
		125.9	0.226*	0.3*	0.276	0.652	0.698	0.782	0.836	0.892	0.25*
		126	0.226*	0.3*	0.276	0.652	0.698	0.782	0.936	0.892	0.25*
		126.1	0.226*	0.3*	0.276	0.652	0.698	0.782	0.936	0.892	0.35*
		126.2	0.126*	0.3*	0.276	0.652	0.698	0.782	0.936	0.892	0.35*
		126.3	0.126*	0.3*	0.276	0.652	0.698	0.782	0.936	0.892	0.35*
		126.4	0.126*	0.3*	0.376	0.552	0.698	0.682	0.936	0.892	0.35*
		126.5	0.226*	0.3*	0.376	0.552	0.698	0.682	1.036	0.992	0.35*
		126.6	0.226*	0.3*	0.376	0.552	0.698	0.682	1.036	0.992	0.35*
		126.7	0.226*	0.3*	0.376	0.552	0.698	0.782	1.036	0.992	0.35*
		126.8	0.226*	0.3*	0.276	0.552	0.698	0.782	1.036	0.992	0.25*
		126.9	0.226*	0.2*	0.276	0.552	0.698	0.782	1.036	0.892	0.15*
		127	0.226*	0.2*	0.176	0.452	0.698	0.782	1.036	0.992	0.15*
		127.1	0.126*	0.1*	0.176	0.552	0.698	0.782	1.036	0.992	0.15*
		127.2	0.126*	0.1*	0.176	0.552	0.598	0.682	0.936	0.992	0.15*
		127.3	0.126*	0.1*	0.176	0.552	0.598	0.682	0.936	0.992	0.15*
		127.4	0.126*	0.1*	0.176	0.552	0.498	0.682	0.936	0.992	0.15*
		127.5	0.126*	0.1*	0.276	0.552	0.598	0.682	0.936	0.992	0.15*
		127.6	0.126*	0.1*	0.276	0.552	0.698	0.782	0.936	0.992	0.15*
		127.7	0.126*	0.1*	0.276	0.552	0.698	0.782	0.836	0.892	0.15*
		127.8	0.026*	0.1*	0.276	0.552	0.698	0.782	0.836	0.892	0.25*
		127.9	0.026*	0.2*	0.276	0.552	0.698	0.782	0.836	0.892	0.35*
		128	0.126*	0.3*	0.276	0.552	0.698	0.682	0.836	0.892	0.25*
		128.1	0.126*	0.3*	0.276	0.452	0.698	0.682	0.936	0.892	0.35*
		128.2	0.226*	0.3*	0.276	0.452	0.698	0.682	0.936	0.892	0.35*
		128.3	0.226*	0.3*	0.276	0.452	0.698	0.682	0.936	0.892	0.35*
		128.4	0.226*	0.3*	0.176	0.352	0.698	0.782	0.936	0.892	0.25*
		128.5	0.226*	0.3*	0.176	0.352	0.598	0.682	0.836	0.992	0.25*
		128.6	0.226*	0.3*	0.176	0.352	0.598	0.682	0.836	0.892	0.25*
		128.7	0.226*	0.3*	0.176	0.352	0.598	0.682	0.836	0.892	0.25*
		128.8	0.226*	0.3*	0.176	0.352	0.598	0.682	0.836	0.892	0.25*
		128.9	0.126*	0.2*	0.276	0.452	0.598	0.682	0.836	0.892	0.25*
		129	0.126*	0.1*	0.276	0.452	0.598	0.682	0.836	0.892	0.25*
		129.1	0.126*	0.1*	0.276	0.552	0.598	0.682	0.836	0.892	0.15*
		129.2	0.226*	0.1*	0.276	0.552	0.698	0.782	0.836	0.892	0.15*
		129.3	0.226*	0.1*	0.276	0.552	0.698	0.782	0.836	0.892	0.15*
		129.4	0.226*	0.1*	0.276	0.552	0.698	0.782	0.836	0.892	0.15*
		129.5	0.226*	0.1*	0.276	0.552	0.698	0.782	0.936	0.992	0.15*
		129.6	0.126*	0.1*	0.276	0.452	0.698	0.782	0.936	0.992	0.15*
		129.7	0.126*	0.1*	0.276	0.452	0.698	0.782	0.936	0.992	0.15*
		129.8	0.126*	0.1*	0.176	0.352	0.698	0.782	0.936	0.992	0.15*
		129.9	0.126*	0.1*	0.176	0.352	0.698	0.782	0.936	0.992	0.15*
		130	0.126*	0.1*	0.176	0.352	0.698	0.782	0.936	0.992	0.15*
		130.1	0.126*	0.1*	0.176	0.352	0.598	0.682	0.836	0.892	0.15*
		130.2	0.126*	0.1*	0.176	0.352	0.498	0.682	0.836	0.892	0.05*
		130.3	0.126*	0.1*	0.176	0.352	0.498	0.682	0.736	0.792	0.05*
		130.4	0.126*	0.2*	0.176	0.352	0.498	0.682	0.736	0.792	0.05*
		130.5	0.126*	0.2*	0.176	0.352	0.498	0.682	0.736	0.892	0.05*
		130.6	0.226*	0.3*	0.176	0.352	0.498	0.682	0.736	0.892	0.05*
		130.7	0.226*	0.3*	0.176	0.352	0.598	0.682	0.836	0.892	0.05*
		130.8	0.226*	0.3*	0.176	0.352	0.598	0.582	0.836	0.892	0.05*
		130.9	0.226*	0.3*	0.176	0.352	0.598	0.582	0.836	0.892	0.05*
		131	0.126*	0.3*	0.276	0.452	0.598	0.682	0.836	0.892	-0.05*
		131.1	0.126*	0.3*	0.276	0.452	0.598	0.682	0.836	0.892	-0.05*
		131.2	0.126*	0.2*	0.276	0.452	0.598	0.682	0.836	0.892	0.05*
		131.3	0.126*	0.2*	0.276	0.352	0.598	0.682	0.836	0.892	0.15*
		131.4	0.026*	0.1*	0.276	0.352	0.598	0.682	0.736	0.892	0.15*
		131.5	0.026*	0.1*	0.176	0.452	0.598	0.682	0.736	0.792	0.15*
		131.6	0.026*	0.1*	0.176	0.452	0.598	0.682	0.736	0.792	0.15*
		131.7	0.126*	0.1*	0.076	0.352	0.598	0.582	0.736	0.792	0.15*
		131.8	0.126*	0.1*	0.076	0.352	0.598	0.582	0.736	0.792	0.15*
		131.9	0.126*	0.1*	0.076	0.352	0.698	0.682	0.736	0.792	0.15*
		132	0.126*	0.1*	0.076	0.352	0.598	0.682	0.736	0.792	0.05*
		132.1	0.126*	0.1*	0.076	0.352	0.598	0.682	0.836	0.892	0.05*
		132.2	0.126*	0.1*	0.076	0.352	0.498	0.582	0.936	0.892	0.05*
		132.3	0.126*	0.1*	0.076	0.352	0.498	0.582	0.936	0.892	0.05*
		132.4	0.126*	0.1*	0.076	0.352	0.598	0.582	0.836	0.792	0.05*
		132.5	0.126*	0.2*	0.076	0.352	0.598	0.582	0.836	0.792	-0.05*
		132.6	0.226*	0.2*	0.276	0.452	0.598	0.582	0.836	0.792	0.05*
		132.7	0.226*	0.2*	0.276	0.352	0.598	0.582	0.836	0.892	0.05*
		132.8	0.126*	0.2*	0.276	0.352	0.598	0.682	0.836	0.892	0.05*
		132.9	0.126*	0.2*	0.276	0.352	0.598	0.682	0.736	0.892	0.05*
		133	0.126*	0.2*	0.276	0.352	0.598	0.682	0.736	0.892	0.05*
		133.1	0.126*	0.2*	0.276	0.352	0.598	0.682	0.736	0.892	0.05*
		133.2	0.126*	0.2*	0.276	0.352	0.598	0.682	0.736	0.892	0.05*
		133.3	0.126*	0.2*	0.176	0.252	0.498	0.682	0.736	0.792	0.05*
		133.4	0.126*	0.2*	0.076	0.252	0.498	0.582	0.736	0.792	0.05*
		133.5	0.126*	0.2*	0.076	0.352	0.498	0.582	0.836	0.892	0.05*
		133.6	0.026*	0.1*	0.076	0.352	0.498	0.582	0.836	0.892	0.05*
		133.7	0.026*	0.1*	0.076	0.352	0.598	0.582	0.836	0.892	0.05*
		133.8	0.026*	0*	0.076	0.352	0.598	0.582	0.836	0.892	0.05*
		133.9	0.026*	0*	0.176	0.452	0.598	0.582	0.736	0.792	0.05*
		134	0.126*	0*	0.176	0.452	0.598	0.582	0.836	0.792	0.05*
		134.1	0.126*	0*	0.176	0.452	0.598	0.582	0.736	0.792	0.05*
		134.2	0.126*	0*	0.176	0.452	0.598	0.582	0.736	0.792	0.05*
		134.3	0.126*	0*	0.176	0.352	0.498	0.582	0.736	0.792	0.05*
		134.4	0.126*	0.1*	0.176	0.352	0.498	0.582	0.736	0.792	0.05*
		134.5	0.126*	0.1*	0.276	0.352	0.498	0.582	0.736	0.692	0.15*
		134.6	0.126*	0.1*	0.276	0.352	0.498	0.482	0.736	0.692	0.15*
		134.7	0.026*	0.1*	0.176	0.352	0.498	0.482	0.836	0.792	0.15*
		134.8	0.026*	0.1*	0.176	0.352	0.498	0.482	0.836	0.792	0.05*
		134.9	0.026*	0.1*	0.176	0.452	0.498	0.482	0.836	0.792	0.05*
		135	0.026*	0.1*	0.076	0.352	0.498	0.482	0.736	0.692	0.05*
		135.1	0.026*	0.1*	0.176	0.452	0.498	0.582	0.736	0.792	0.05*
		135.2	0.126*	0.2*	0.176	0.452	0.498	0.582	0.736	0.792	0.15*
		135.3	0.126*	0.2*	0.176	0.452	0.598	0.582	0.736	0.792	0.15*
		135.4	0.226*	0.2*	0.176	0.452	0.598	0.582	0.836	0.792	0.15*
		135.5	0.226*	0.2*	0.176	0.452	0.598	0.582	0.836	0.792	0.15*
		135.6	0.226*	0.1*	0.176	0.452	0.398	0.482	0.836	0.792	0.15*
		135.7	0.126*	0*	0.176	0.452	0.398	0.482	0.836	0.792	0.15*
		135.8	0.126*	0*	0.176	0.452	0.398	0.482	0.836	0.792	0.15*
		135.9	0.126*	0*	0.276	0.452	0.398	0.482	0.836	0.792	0.15*
		136	0.126*	0*	0.276	0.452	0.398	0.382	0.836	0.792	0.15*
		136.1	0.126*	0*	0.276	0.352	0.498	0.482	0.836	0.792	0.15*
		136.2	0.126*	0*	0.176	0.352	0.498	0.482	0.836	0.692	0.15*
		136.3	0.126*	0*	0.176	0.352	0.498	0.482	0.736	0.692	0.15*
		136.4	0.126*	0*	0.176	0.452	0.498	0.482	0.736	0.692	0.15*
		136.5	0.126*	0.1*	0.176	0.452	0.498	0.482	0.736	0.692	0.15*
		136.6	0.026*	0.1*	0.276	0.552	0.398	0.482	0.636	0.592	0.15*
		136.7	0.126*	0.1*	0.176	0.452	0.398	0.482	0.636	0.592	0.05*
		136.8	0.126*	0.1*	0.176	0.452	0.398	0.482	0.636	0.592	0.05*
		136.9	0.126*	0.1*	0.176	0.452	0.398	0.382	0.636	0.692	0.15*
		137	0.026*	0*	0.176	0.452	0.398	0.382	0.636	0.692	0.15*
		137.1	0.026*	0*	0.176	0.452	0.398	0.382	0.636	0.692	0.15*
		137.2	0.026*	0*	0.276	0.452	0.398	0.382	0.736	0.692	0.15*
		137.3	0.026*	0*	0.276	0.452	0.398	0.382	0.736	0.692	0.15*
		137.4	0.126*	0.1*	0.276	0.452	0.398	0.482	0.836	0.792	0.15*
		137.5	0.126*	0*	0.276	0.452	0.498	0.582	0.836	0.792	0.15*
		137.6	0.126*	0*	0.276	0.452	0.498	0.582	0.836	0.692	0.25*
		137.7	0.126*	0*	0.276	0.452	0.498	0.582	0.836	0.692	0.15*
		137.8	0.126*	0*	0.276	0.452	0.498	0.582	0.836	0.692	0.15*
		137.9	0.226*	0*	0.276	0.452	0.498	0.582	0.836	0.692	0.15*
		138	0.226*	0*	0.276	0.452	0.398	0.482	0.836	0.692	0.15*
		138.1	0.226*	0*	0.376	0.652	0.398	0.482	0.736	0.692	0.15*
		138.2	0.226*	0*	0.376	0.652	0.298	0.482	0.636	0.592	0.15*
		138.3	0.226*	0*	0.376	0.652	0.298	0.482	0.636	0.592	0.25*
		138.4	0.126*	-0.1*	0.376	0.652	0.298	0.482	0.636	0.592	0.25*
		138.5	0.126*	0*	0.376	0.552	0.298	0.482	0.636	0.592	0.25*
		138.6	0.126*	0*	0.276	0.452	0.298	0.482	0.636	0.592	0.25*
		138.7	0.126*	0.1*	0.276	0.452	0.298	0.382	0.636	0.592	0.25*
		138.8	0.126*	0.1*	0.276	0.452	0.398	0.382	0.636	0.592	0.25*
		138.9	0.126*	0.1*	0.276	0.452	0.398	0.382	0.636	0.592	0.25*
		139	0.126*	0.1*	0.276	0.452	0.498	0.482	0.636	0.592	0.25*
		139.1	0.126*	0.1*	0.276	0.452	0.498	0.482	0.636	0.592	0.25*
		139.2	0.126*	0.1*	0.276	0.452	0.498	0.582	0.636	0.592	0.25*
		139.3	0.126*	0.1*	0.276	0.452	0.498	0.582	0.636	0.592	0.25*
		139.4	0.126*	0.1*	0.276	0.452	0.498	0.582	0.636	0.592	0.35*
		139.5	0.026*	0*	0.276	0.452	0.498	0.582	0.636	0.592	0.35*
		139.6	0.026*	0*	0.276	0.452	0.498	0.582	0.636	0.592	0.25*
		139.7	0.026*	0*	0.176	0.452	0.498	0.582	0.636	0.592	0.25*
		139.8	0.026*	0*	0.176	0.452	0.398	0.482	0.736	0.692	0.15*
		139.9	0.126*	0.1*	0.276	0.452	0.298	0.482	0.736	0.692	0.15*
		140	0.126*	0*	0.276	0.452	0.298	0.482	0.736	0.692	0.15*
		140.1	0.126*	0*	0.276	0.452	0.298	0.482	0.736	0.692	0.15*
		140.2	0.126*	0*	0.276	0.452	0.298	0.482	0.736	0.692	0.15*
		140.3	0.126*	0*	0.276	0.452	0.298	0.482	0.736	0.692	0.15*
		140.4	0.126*	0*	0.276	0.452	0.298	0.482	0.736	0.692	0.25*
		140.5	0.226*	0*	0.276	0.352	0.298	0.482	0.736	0.692	0.25*
		140.6	0.226*	0*	0.376	0.452	0.298	0.482	0.736	0.592	0.25*
		140.7	0.226*	0*	0.376	0.452	0.298	0.482	0.636	0.492	0.25*
		140.8	0.226*	0*	0.376	0.552	0.298	0.482	0.636	0.592	0.25*
		140.9	0.226*	0.1*	0.376	0.552	0.298	0.482	0.636	0.592	0.25*
		141	0.226*	0.1*	0.376	0.552	0.298	0.482	0.636	0.592	0.25*
		141.1	0.126*	0*	0.376	0.552	0.198	0.382	0.636	0.592	0.25*
		141.2	0.026*	0*	0.276	0.452	0.298	0.382	0.636	0.592	0.25*
		141.3	0.026*	0*	0.276	0.452	0.398	0.582	0.636	0.592	0.35*
		141.4	0.026*	0*	0.276	0.452	0.398	0.482	0.736	0.592	0.35*
		141.5	0.026*	0*	0.276	0.452	0.398	0.482	0.736	0.592	0.25*
		141.6	0.026*	0*	0.176	0.452	0.398	0.482	0.736	0.592	0.25*
		141.7	0.026*	0*	0.176	0.452	0.398	0.482	0.736	0.592	0.25*
		141.8	0.026*	0*	0.176	0.452	0.298	0.482	0.736	0.592	0.15*
		141.9	0.026*	0*	0.176	0.452	0.298	0.482	0.736	0.592	0.15*
		142	0.026*	0*	0.176	0.452	0.298	0.482	0.736	0.592	0.15*
		142.1	0.126*	0.1*	0.176	0.452	0.298	0.482	0.736	0.592	0.15*
		142.2	0.126*	0.1*	0.176	0.452	0.298	0.482	0.736	0.692	0.15*
		142.3	0.126*	0.1*	0.176	0.452	0.298	0.482	0.736	0.692	0.15*
		142.4	0.126*	0.1*	0.276	0.452	0.298	0.482	0.736	0.692	0.25*
		142.5	0.126*	0.1*	0.276	0.452	0.298	0.482	0.736	0.692	0.25*
		142.6	0.126*	0.1*	0.276	0.452	0.298	0.482	0.736	0.692	0.25*
		142.7	0.126*	0.1*	0.276	0.452	0.298	0.482	0.736	0.692	0.25*
		142.8	0.126*	0.1*	0.276	0.452	0.398	0.482	0.636	0.592	0.15*
		142.9	0.126*	0.1*	0.276	0.352	0.398	0.482	0.636	0.592	0.15*
		143	0.126*	0.1*	0.276	0.352	0.398	0.482	0.736	0.592	0.15*
		143.1	0.026*	0*	0.276	0.452	0.398	0.382	0.736	0.592	0.15*
		143.2	0.026*	0*	0.276	0.452	0.298	0.282	0.736	0.592	0.15*
		143.3	0.026*	0*	0.276	0.452	0.298	0.282	0.736	0.592	0.15*
		143.4	0.026*	0*	0.276	0.452	0.298	0.382	0.736	0.592	0.25*
		143.5	0.026*	0*	0.276	0.452	0.298	0.382	0.736	0.592	0.25*
		143.6	0.126*	0*	0.276	0.452	0.298	0.382	0.736	0.592	0.25*
		143.7	0.126*	0*	0.176	0.452	0.298	0.482	0.736	0.592	0.25*
		143.8	0.126*	0*	0.076	0.352	0.298	0.482	0.836	0.592	0.25*
		143.9	0.126*	0*	0.176	0.452	0.298	0.482	0.736	0.592	0.25*
		144	0.126*	0*	0.176	0.452	0.298	0.482	0.736	0.592	0.25*
		144.1	0.126*	0.1*	0.176	0.452	0.298	0.482	0.736	0.692	0.25*
		144.2	0.126*	0.1*	0.176	0.452	0.298	0.482	0.736	0.692	0.25*
		144.3	0.126*	0.1*	0.176	0.452	0.298	0.482	0.736	0.692	0.25*
		144.4	0.126*	0.1*	0.176	0.452	0.298	0.482	0.736	0.692	0.25*
		144.5	0.126*	0.1*	0.176	0.452	0.298	0.482	0.636	0.592	0.25*
		144.6	0.026*	0*	0.176	0.452	0.298	0.382	0.636	0.592	0.25*
		144.7	0.026*	0*	0.176	0.452	0.298	0.382	0.636	0.592	0.25*
		144.8	0.026*	0*	0.276	0.452	0.298	0.482	0.636	0.592	0.25*
		144.9	0.026*	0*	0.276	0.452	0.298	0.482	0.636	0.592	0.15*
		145	0.026*	0*	0.276	0.352	0.298	0.482	0.636	0.592	0.15*
		145.1	0.126*	0*	0.276	0.352	0.298	0.482	0.636	0.592	0.15*
		145.2	0.026*	-0.1*	0.276	0.352	0.298	0.482	0.636	0.592	0.15*
		145.3	0.026*	-0.1*	0.276	0.452	0.198	0.382	0.636	0.592	0.15*
		145.4	0.026*	-0.1*	0.276	0.352	0.198	0.382	0.736	0.592	0.25*
		145.5	0.026*	-0.1*	0.276	0.452	0.198	0.382	0.636	0.592	0.25*
		145.6	0.026*	-0.1*	0.276	0.452	0.198	0.382	0.636	0.592	0.25*
		145.7	0.026*	-0.1*	0.276	0.452	0.298	0.482	0.636	0.592	0.25*
		145.8	0.026*	-0.1*	0.176	0.452	0.298	0.482	0.636	0.592	0.25*
		145.9	0.026*	0*	0.176	0.452	0.298	0.382	0.636	0.592	0.25*
		146	0.126*	0.1*	0.176	0.452	0.298	0.382	0.736	0.692	0.25*
		146.1	0.126*	0.1*	0.076	0.352	0.298	0.382	0.636	0.692	0.25*
		146.2	0.126*	0.1*	0.076	0.352	0.298	0.382	0.736	0.692	0.15*
		146.3	0.126*	0.1*	0.176	0.452	0.298	0.382	0.736	0.692	0.15*
		146.4	0.126*	0.1*	0.276	0.452	0.298	0.382	0.736	0.692	0.25*
		146.5	0.226*	0.1*	0.276	0.452	0.298	0.382	0.736	0.692	0.25*
		146.6	0.126*	0*	0.276	0.452	0.298	0.482	0.636	0.592	0.25*
		146.7	0.126*	0*	0.276	0.452	0.298	0.482	0.636	0.592	0.25*
		146.8	0.126*	0*	0.276	0.452	0.298	0.482	0.636	0.592	0.25*
		146.9	0.126*	0*	0.276	0.452	0.298	0.482	0.536	0.592	0.25*
		147	0.126*	0*	0.276	0.452	0.298	0.482	0.536	0.592	0.15*
		147.1	0.026*	-0.1*	0.276	0.452	0.298	0.482	0.536	0.592	0.15*
		147.2	0.026*	-0.1*	0.276	0.452	0.298	0.382	0.536	0.592	0.15*
		147.3	0.026*	-0.1*	0.176	0.452	0.298	0.382	0.536	0.592	0.15*
		147.4	0.026*	-0.1*	0.176	0.452	0.298	0.382	0.536	0.592	0.15*
		147.5	0.026*	-0.1*	0.276	0.552	0.398	0.482	0.536	0.592	0.15*
		147.6	0.026*	0*	0.176	0.452	0.398	0.482	0.536	0.592	0.15*
		147.7	0.026*	0*	0.176	0.452	0.398	0.482	0.536	0.592	0.15*
		147.8	0.026*	0*	0.176	0.352	0.398	0.482	0.536	0.592	0.15*
		147.9	0.026*	0*	0.176	0.352	0.398	0.482	0.536	0.592	0.15*
		148	0.026*	-0.1*	0.176	0.352	0.298	0.482	0.536	0.592	0.25*
		148.1	0.026*	-0.1*	0.176	0.352	0.298	0.482	0.436	0.492	0.25*
		148.2	0.126*	-0.1*	0.176	0.352	0.298	0.482	0.436	0.392	0.25*
		148.3	0.126*	-0.1*	0.176	0.352	0.398	0.482	0.436	0.492	0.35*
		148.4	0.226*	0*	0.176	0.352	0.398	0.482	0.436	0.492	0.35*
		148.5	0.226*	0*	0.176	0.352	0.398	0.482	0.436	0.492	0.35*
		148.6	0.226*	0*	0.276	0.452	0.398	0.482	0.436	0.492	0.25*
		148.7	0.226*	0*	0.276	0.452	0.398	0.382	0.436	0.492	0.25*
		148.8	0.126*	0*	0.276	0.452	0.398	0.382	0.436	0.492	0.25*
		148.9	0.126*	0*	0.176	0.352	0.398	0.382	0.436	0.492	0.25*
		149	0.126*	0.1*	0.176	0.352	0.398	0.382	0.436	0.492	0.25*
		149.1	0.026*	0*	0.176	0.452	0.398	0.482	0.436	0.492	0.25*
		149.2	0.026*	0*	0.176	0.452	0.298	0.482	0.436	0.492	0.15*
		149.3	0.026*	0*	0.176	0.452	0.298	0.482	0.436	0.492	0.15*
		149.4	0.026*	0*	0.176	0.452	0.298	0.482	0.336	0.492	0.15*
		149.5	0.126*	0.1*	0.176	0.452	0.298	0.482	0.336	0.492	0.15*
		149.6	0.126*	0.1*	0.176	0.452	0.298	0.482	0.336	0.492	0.15*
		149.7	0.126*	0.1*	0.176	0.452	0.298	0.482	0.336	0.492	0.15*
		149.8	0.126*	0.1*	0.176	0.452	0.398	0.582	0.336	0.492	0.15*
[truncated: 5,501 more rows]

## Sheet: Figure_S6_B
		Time	3.9063	7.8125	15.6	31.3	62.5	125	250	500	3.91
		-50	0.586*	0.244*	0.636	0.366	-0.056	-0.028	0.102	0.07	-0.374*
		-49.9	0.586*	0.244*	0.536	0.266	-0.056	-0.028	0.002	-0.03	-0.274*
		-49.8	0.486*	0.144*	0.536	0.266	-0.056	0.072	0.002	0.07	-0.274*
		-49.7	0.486*	0.244*	0.536	0.166	-0.056	0.072	0.002	0.07	-0.374*
		-49.6	0.486*	0.144*	0.636	0.266	-0.056	0.072	-0.098	0.07	-0.374*
		-49.5	0.486*	0.144*	0.636	0.166	0.044	0.072	0.002	0.07	-0.374*
		-49.4	0.486*	0.144*	0.636	0.266	0.044	0.072	0.002	0.07	-0.274*
		-49.3	0.386*	0.044*	0.536	0.266	0.044	0.172	0.002	0.17	-0.274*
		-49.2	0.486*	0.044*	0.636	0.266	0.044	0.072	-0.098	0.07	-0.374*
		-49.1	0.486*	0.044*	0.636	0.266	0.044	0.072	0.002	0.07	-0.374*
		-49	0.486*	0.044*	0.636	0.266	0.144	0.072	0.002	0.07	-0.374*
		-48.9	0.486*	0.144*	0.536	0.166	0.144	0.172	0.002	0.07	-0.174*
		-48.8	0.386*	0.144*	0.636	0.266	0.044	0.072	0.002	0.07	-0.274*
		-48.7	0.386*	0.144*	0.636	0.266	0.044	0.072	0.002	0.07	-0.374*
		-48.6	0.386*	0.044*	0.636	0.266	0.044	0.072	-0.098	0.07	-0.374*
		-48.5	0.486*	0.144*	0.636	0.266	0.044	0.072	0.002	0.07	-0.374*
		-48.4	0.486*	0.144*	0.636	0.166	0.044	0.072	0.102	0.17	-0.374*
		-48.3	0.486*	0.244*	0.636	0.166	0.144	0.172	0.102	0.17	-0.274*
		-48.2	0.386*	0.144*	0.636	0.366	0.044	0.072	0.102	0.07	-0.374*
		-48.1	0.386*	0.144*	0.636	0.366	0.044	0.072	0.202	0.07	-0.374*
		-48	0.486*	0.144*	0.636	0.366	0.144	0.172	0.202	0.17	-0.374*
		-47.9	0.486*	0.244*	0.636	0.266	0.144	0.172	0.102	0.07	-0.374*
		-47.8	0.486*	0.244*	0.636	0.366	0.144	0.072	0.002	0.07	-0.274*
		-47.7	0.486*	0.244*	0.636	0.366	0.144	0.072	0.002	0.07	-0.274*
		-47.6	0.486*	0.244*	0.636	0.366	0.144	0.172	0.002	0.17	-0.374*
		-47.5	0.486*	0.244*	0.736	0.366	0.144	0.172	0.002	0.07	-0.374*
		-47.4	0.486*	0.244*	0.636	0.266	0.244	0.172	0.002	0.07	-0.374*
		-47.3	0.386*	0.244*	0.536	0.266	0.144	0.072	0.002	0.07	-0.274*
		-47.2	0.286*	0.244*	0.536	0.266	0.144	0.072	0.002	0.07	-0.274*
		-47.1	0.386*	0.244*	0.636	0.366	0.144	0.072	0.002	0.07	-0.374*
		-47	0.386*	0.244*	0.636	0.366	0.144	0.072	0.002	0.07	-0.474*
		-46.9	0.386*	0.244*	0.536	0.266	0.044	0.072	0.002	0.07	-0.374*
		-46.8	0.286*	0.244*	0.536	0.266	0.044	0.072	0.002	0.07	-0.374*
		-46.7	0.286*	0.244*	0.636	0.366	0.044	0.072	0.002	0.07	-0.374*
		-46.6	0.386*	0.244*	0.636	0.366	0.144	0.072	-0.098	0.07	-0.374*
		-46.5	0.386*	0.244*	0.636	0.366	0.044	-0.028	0.002	0.07	-0.274*
		-46.4	0.386*	0.244*	0.536	0.266	0.044	-0.028	0.002	0.07	-0.274*
		-46.3	0.286*	0.144*	0.536	0.366	0.044	-0.028	-0.098	-0.03	-0.274*
		-46.2	0.386*	0.144*	0.636	0.366	0.044	-0.028	-0.098	-0.03	-0.274*
		-46.1	0.386*	0.144*	0.636	0.366	0.144	-0.028	0.002	0.07	-0.274*
		-46	0.286*	0.144*	0.536	0.366	0.044	-0.028	0.002	0.07	-0.274*
		-45.9	0.286*	0.144*	0.436	0.266	0.044	-0.028	0.002	-0.03	-0.274*
		-45.8	0.386*	0.244*	0.436	0.266	0.044	-0.028	0.002	-0.03	-0.274*
		-45.7	0.386*	0.244*	0.436	0.266	0.044	-0.028	-0.098	-0.13	-0.274*
		-45.6	0.386*	0.244*	0.536	0.266	0.044	-0.028	-0.098	-0.13	-0.274*
		-45.5	0.386*	0.244*	0.536	0.266	0.044	-0.028	-0.098	-0.13	-0.174*
		-45.4	0.386*	0.244*	0.536	0.366	0.144	-0.028	0.002	-0.03	-0.174*
		-45.3	0.386*	0.244*	0.536	0.366	0.144	-0.028	0.002	-0.03	-0.174*
		-45.2	0.386*	0.244*	0.536	0.366	0.144	-0.028	0.002	-0.03	-0.274*
		-45.1	0.286*	0.144*	0.536	0.366	0.144	0.072	-0.098	-0.03	-0.374*
		-45	0.286*	0.144*	0.536	0.366	0.144	0.072	0.002	-0.03	-0.374*
		-44.9	0.386*	0.144*	0.536	0.366	0.244	0.072	0.002	0.07	-0.474*
		-44.8	0.386*	0.244*	0.436	0.166	0.144	0.072	0.002	0.07	-0.474*
		-44.7	0.386*	0.144*	0.336	0.166	0.144	0.072	0.002	-0.03	-0.574*
		-44.6	0.386*	0.144*	0.336	0.066	0.044	0.072	0.002	0.07	-0.474*
		-44.5	0.386*	0.244*	0.336	0.066	-0.056	0.072	0.002	0.07	-0.574*
		-44.4	0.386*	0.044*	0.536	0.266	0.044	0.072	0.002	-0.13	-0.474*
		-44.3	0.386*	0.044*	0.436	0.166	0.044	-0.028	0.002	-0.03	-0.374*
		-44.2	0.286*	0.044*	0.436	0.266	0.144	0.072	0.002	-0.03	-0.374*
		-44.1	0.386*	0.144*	0.436	0.166	0.044	-0.028	0.002	-0.13	-0.274*
		-44	0.286*	0.044*	0.436	0.166	0.044	0.072	0.002	-0.03	-0.174*
		-43.9	0.286*	0.144*	0.536	0.266	0.044	0.072	0.102	-0.03	-0.074*
		-43.8	0.286*	0.044*	0.436	0.266	0.044	-0.028	0.002	-0.13	-0.174*
		-43.7	0.286*	0.144*	0.436	0.166	0.144	0.072	0.002	-0.03	-0.074*
		-43.6	0.286*	0.044*	0.536	0.266	0.144	0.072	-0.098	-0.13	-0.174*
		-43.5	0.286*	0.144*	0.436	0.166	0.144	0.072	-0.098	-0.03	-0.174*
		-43.4	0.286*	0.044*	0.436	0.266	0.144	0.072	-0.098	-0.13	-0.274*
		-43.3	0.286*	0.144*	0.436	0.166	0.144	0.072	0.002	-0.03	-0.274*
		-43.2	0.486*	0.244*	0.436	0.166	0.044	0.072	-0.098	-0.13	-0.174*
		-43.1	0.386*	0.144*	0.436	0.166	0.144	0.072	-0.098	-0.13	-0.274*
		-43	0.386*	0.244*	0.436	0.066	0.144	0.072	-0.098	-0.03	-0.274*
		-42.9	0.386*	0.144*	0.436	0.066	0.144	0.172	0.102	0.07	-0.274*
		-42.8	0.286*	0.144*	0.436	0.066	0.244	0.172	0.002	-0.03	-0.274*
		-42.7	0.286*	0.144*	0.436	0.166	0.144	0.072	0.002	0.07	-0.274*
		-42.6	0.186*	0.044*	0.236	0.066	0.144	0.172	0.102	0.07	-0.174*
		-42.5	0.186*	0.144*	0.336	0.166	0.144	0.172	0.102	0.07	-0.174*
		-42.4	0.286*	0.144*	0.336	0.266	0.144	0.172	0.102	0.07	-0.274*
		-42.3	0.286*	0.144*	0.336	0.266	0.244	0.172	0.002	-0.03	-0.274*
		-42.2	0.286*	0.244*	0.336	0.266	0.244	0.172	0.002	0.07	-0.174*
		-42.1	0.286*	0.244*	0.336	0.266	0.144	0.172	0.102	0.07	-0.174*
		-42	0.286*	0.144*	0.336	0.266	0.144	0.172	0.002	0.07	-0.174*
		-41.9	0.386*	0.244*	0.336	0.266	0.244	0.172	0.002	0.07	-0.174*
		-41.8	0.386*	0.244*	0.336	0.266	0.244	0.272	0.102	0.17	-0.174*
		-41.7	0.386*	0.244*	0.336	0.166	0.144	0.172	0.002	0.07	-0.274*
		-41.6	0.386*	0.244*	0.336	0.266	0.244	0.272	0.002	0.17	-0.074*
		-41.5	0.286*	0.144*	0.236	0.166	0.244	0.272	0.102	0.17	-0.074*
		-41.4	0.386*	0.144*	0.236	0.166	0.244	0.272	0.102	0.07	-0.074*
		-41.3	0.386*	0.244*	0.236	0.166	0.344	0.372	0.102	0.07	-0.074*
		-41.2	0.386*	0.244*	0.336	0.166	0.244	0.372	0.002	-0.03	-0.174*
		-41.1	0.286*	0.144*	0.436	0.266	0.144	0.172	0.002	-0.03	-0.074*
		-41	0.286*	0.244*	0.436	0.266	0.144	0.172	0.002	-0.03	-0.074*
		-40.9	0.286*	0.244*	0.336	0.166	0.144	0.172	0.002	-0.03	-0.174*
		-40.8	0.286*	0.244*	0.336	0.266	0.044	0.072	0.002	-0.03	-0.174*
		-40.7	0.286*	0.244*	0.336	0.266	0.044	0.072	-0.098	-0.03	-0.074*
		-40.6	0.186*	0.244*	0.236	0.166	0.044	0.172	-0.098	-0.03	-0.074*
		-40.5	0.286*	0.244*	0.236	0.166	0.044	0.172	-0.098	-0.03	-0.074*
		-40.4	0.286*	0.244*	0.236	0.166	0.144	0.172	0.002	0.07	-0.074*
		-40.3	0.286*	0.244*	0.236	0.166	0.044	0.072	0.002	0.07	-0.074*
		-40.2	0.286*	0.144*	0.236	0.166	0.044	0.072	0.002	0.07	-0.074*
		-40.1	0.286*	0.244*	0.236	0.166	0.144	0.172	0.002	-0.03	-0.074*
		-40	0.286*	0.244*	0.236	0.166	0.144	0.172	0.002	0.07	0.026*
		-39.9	0.186*	0.144*	0.236	0.166	0.144	0.272	0.002	0.07	0.026*
		-39.8	0.186*	0.144*	0.236	0.166	0.144	0.172	0.002	0.07	-0.074*
		-39.7	0.286*	0.144*	0.236	0.166	0.144	0.172	0.002	0.07	-0.074*
		-39.6	0.286*	0.144*	0.236	0.266	0.144	0.072	0.002	0.07	-0.074*
		-39.5	0.186*	0.144*	0.336	0.166	0.144	0.172	0.002	0.07	0.026*
		-39.4	0.186*	0.144*	0.336	0.166	0.144	0.172	0.102	0.17	0.026*
		-39.3	0.186*	0.244*	0.336	0.166	0.044	0.072	0.002	0.07	0.026*
		-39.2	0.186*	0.244*	0.336	0.166	-0.056	-0.028	-0.098	0.07	0.026*
		-39.1	0.186*	0.244*	0.336	0.166	0.044	-0.028	-0.098	0.07	0.026*
		-39	0.186*	0.244*	0.336	0.166	0.044	0.072	0.002	0.17	0.126*
		-38.9	0.186*	0.144*	0.336	0.166	0.044	0.072	0.002	0.07	0.126*
		-38.8	0.186*	0.244*	0.236	0.166	0.044	0.072	0.002	0.17	0.026*
		-38.7	0.186*	0.244*	0.236	0.066	0.044	0.072	0.002	0.07	0.026*
		-38.6	0.286*	0.244*	0.236	0.166	0.144	0.172	0.002	0.07	-0.074*
		-38.5	0.286*	0.244*	0.236	0.166	0.144	0.172	0.002	0.07	-0.074*
		-38.4	0.286*	0.244*	0.236	0.166	0.144	0.172	0.002	0.07	-0.074*
		-38.3	0.286*	0.244*	0.236	0.166	0.244	0.172	0.002	0.07	0.026*
		-38.2	0.186*	0.144*	0.236	0.166	0.244	0.172	0.002	0.17	0.026*
		-38.1	0.186*	0.144*	0.236	0.166	0.244	0.272	0.002	0.17	0.026*
		-38	0.186*	0.244*	0.336	0.266	0.244	0.272	0.002	0.17	0.026*
		-37.9	0.186*	0.144*	0.236	0.166	0.044	0.172	0.102	0.17	0.026*
		-37.8	0.186*	0.144*	0.336	0.166	0.044	0.172	0.102	0.17	0.026*
		-37.7	0.186*	0.144*	0.336	0.166	0.144	0.172	0.102	0.17	0.026*
		-37.6	0.186*	0.144*	0.336	0.166	0.144	0.172	0.002	0.17	0.026*
		-37.5	0.186*	0.144*	0.336	0.166	0.144	0.172	-0.098	-0.03	-0.074*
		-37.4	0.286*	0.144*	0.336	0.166	0.144	0.172	-0.098	-0.03	-0.074*
		-37.3	0.286*	0.244*	0.336	0.166	0.144	0.172	-0.098	-0.03	-0.074*
		-37.2	0.186*	0.144*	0.136	0.066	0.144	0.172	0.002	-0.03	-0.074*
		-37.1	0.186*	0.144*	0.136	0.066	0.144	0.172	0.002	0.07	-0.074*
		-37	0.086*	0.144*	0.136	0.166	0.144	0.172	0.002	0.07	0.026*
		-36.9	0.186*	0.244*	0.136	0.166	0.144	0.272	0.002	0.07	0.026*
		-36.8	0.186*	0.244*	0.236	0.166	0.244	0.272	0.002	0.07	0.026*
		-36.7	0.186*	0.244*	0.236	0.166	0.044	0.172	0.002	0.07	0.026*
		-36.6	0.186*	0.244*	0.136	0.066	0.044	0.172	0.002	0.07	0.126*
		-36.5	0.186*	0.244*	0.136	-0.034	0.044	0.172	0.002	0.07	0.026*
		-36.4	0.186*	0.144*	0.136	-0.034	0.044	0.072	0.102	0.17	0.026*
		-36.3	0.286*	0.244*	0.136	-0.034	0.044	0.072	0.102	0.17	-0.074*
		-36.2	0.186*	0.144*	0.136	-0.034	0.044	0.072	0.102	0.17	-0.074*
		-36.1	0.186*	0.144*	0.136	-0.034	0.044	0.072	0.202	0.17	-0.074*
		-36	0.186*	0.144*	0.136	0.066	0.144	0.072	0.202	0.27	-0.074*
		-35.9	0.186*	0.144*	0.136	0.066	0.144	0.072	0.102	0.17	0.026*
		-35.8	0.186*	0.144*	0.136	0.066	0.144	0.172	0.102	0.17	-0.074*
		-35.7	0.186*	0.144*	0.136	0.066	0.144	0.172	0.102	0.17	-0.074*
		-35.6	0.286*	0.144*	0.136	0.066	0.144	0.172	0.102	0.17	-0.074*
		-35.5	0.286*	0.144*	0.136	0.066	0.244	0.272	0.102	0.17	-0.074*
		-35.4	0.286*	0.144*	0.036	0.066	0.244	0.272	0.102	0.17	-0.074*
		-35.3	0.286*	0.144*	0.036	0.066	0.244	0.272	0.102	0.07	-0.074*
		-35.2	0.286*	0.144*	0.036	0.166	0.244	0.272	0.102	0.07	0.026*
		-35.1	0.386*	0.244*	0.136	0.166	0.244	0.272	0.202	0.07	-0.074*
		-35	0.386*	0.344*	0.136	0.166	0.244	0.272	0.202	0.07	-0.074*
		-34.9	0.386*	0.344*	0.136	0.166	0.244	0.272	0.302	0.17	-0.074*
		-34.8	0.386*	0.344*	0.136	0.166	0.244	0.272	0.302	0.17	-0.074*
		-34.7	0.286*	0.244*	0.136	0.166	0.244	0.272	0.302	0.17	-0.074*
		-34.6	0.286*	0.144*	0.136	0.166	0.244	0.272	0.102	0.07	-0.074*
		-34.5	0.386*	0.144*	0.136	0.166	0.244	0.272	0.102	0.07	-0.074*
		-34.4	0.286*	0.144*	0.136	0.166	0.244	0.272	0.102	0.07	-0.074*
		-34.3	0.286*	0.144*	0.136	0.166	0.244	0.272	0.102	0.17	-0.074*
		-34.2	0.286*	0.244*	0.136	0.066	0.244	0.272	0.102	0.17	-0.174*
		-34.1	0.286*	0.244*	0.136	0.166	0.244	0.272	0.102	0.17	-0.174*
		-34	0.286*	0.244*	0.036	0.166	0.144	0.172	0.102	0.17	-0.174*
		-33.9	0.286*	0.244*	0.036	0.166	0.144	0.172	0.102	0.17	-0.174*
		-33.8	0.286*	0.244*	0.036	0.166	0.144	0.172	0.202	0.17	-0.074*
		-33.7	0.286*	0.244*	0.036	0.166	0.144	0.272	0.202	0.17	-0.174*
		-33.6	0.386*	0.244*	0.036	0.266	0.144	0.272	0.202	0.17	-0.174*
		-33.5	0.286*	0.144*	0.036	0.266	0.144	0.272	0.202	0.17	-0.174*
		-33.4	0.286*	0.244*	0.136	0.266	0.244	0.272	0.102	0.07	-0.174*
		-33.3	0.386*	0.344*	0.136	0.266	0.244	0.272	0.102	0.17	-0.074*
		-33.2	0.386*	0.344*	0.136	0.166	0.244	0.272	0.102	0.17	-0.074*
		-33.1	0.286*	0.344*	0.136	0.166	0.144	0.172	0.202	0.27	-0.074*
		-33	0.286*	0.344*	0.136	0.166	0.144	0.172	0.202	0.27	-0.074*
		-32.9	0.386*	0.344*	0.136	0.166	0.144	0.272	0.202	0.27	-0.074*
		-32.8	0.386*	0.344*	0.136	0.266	0.144	0.172	0.202	0.17	-0.074*
		-32.7	0.286*	0.144*	0.236	0.266	0.244	0.272	0.202	0.17	-0.074*
		-32.6	0.286*	0.144*	0.236	0.266	0.244	0.272	0.202	0.17	-0.074*
		-32.5	0.286*	0.244*	0.236	0.266	0.144	0.172	0.202	0.17	-0.074*
		-32.4	0.286*	0.244*	0.236	0.266	0.244	0.172	0.202	0.27	0.026*
		-32.3	0.386*	0.344*	0.236	0.266	0.244	0.172	0.202	0.27	0.026*
		-32.2	0.386*	0.344*	0.236	0.266	0.244	0.172	0.102	0.07	-0.074*
		-32.1	0.386*	0.344*	0.136	0.266	0.144	0.172	0.002	0.07	-0.074*
		-32	0.386*	0.244*	0.236	0.266	0.044	0.072	0.002	0.07	0.026*
		-31.9	0.386*	0.244*	0.236	0.266	0.044	0.172	0.002	0.07	0.026*
		-31.8	0.386*	0.344*	0.236	0.266	0.044	0.172	0.102	0.07	0.026*
		-31.7	0.386*	0.344*	0.336	0.366	0.044	0.172	0.102	0.07	0.026*
		-31.6	0.386*	0.344*	0.136	0.266	0.044	0.172	0.202	0.17	-0.074*
		-31.5	0.286*	0.244*	0.136	0.366	0.144	0.172	0.102	0.07	-0.074*
		-31.4	0.286*	0.244*	0.136	0.366	0.244	0.272	0.102	0.17	-0.074*
		-31.3	0.286*	0.244*	0.136	0.366	0.144	0.172	0.102	0.17	0.026*
		-31.2	0.286*	0.244*	0.136	0.366	0.144	0.172	0.102	0.17	0.026*
		-31.1	0.286*	0.244*	0.236	0.366	0.144	0.172	0.102	0.17	0.026*
		-31	0.386*	0.244*	0.136	0.266	0.144	0.172	0.002	0.07	0.126*
		-30.9	0.286*	0.244*	0.136	0.266	0.144	0.172	0.002	0.07	-0.074*
		-30.8	0.186*	0.144*	0.136	0.266	0.144	0.172	0.002	0.07	0.026*
		-30.7	0.186*	0.144*	0.136	0.166	0.144	0.172	0.002	0.17	0.026*
		-30.6	0.186*	0.144*	0.136	0.266	0.044	0.072	0.102	0.17	0.026*
		-30.5	0.186*	0.144*	0.136	0.266	0.144	0.072	0.102	0.17	0.026*
		-30.4	0.286*	0.244*	0.136	0.266	0.144	0.072	0.102	0.07	0.026*
		-30.3	0.286*	0.244*	0.036	0.166	0.144	0.072	0.102	0.07	-0.074*
		-30.2	0.186*	0.244*	0.136	0.166	0.144	0.072	0.002	-0.03	-0.074*
		-30.1	0.186*	0.244*	0.136	0.166	0.044	0.072	0.002	0.07	-0.074*
		-30	0.286*	0.244*	0.136	0.266	0.044	0.072	0.102	0.07	0.026*
		-29.9	0.286*	0.244*	0.236	0.366	0.044	0.072	0.102	0.17	0.026*
		-29.8	0.286*	0.244*	0.236	0.366	0.144	0.172	0.102	0.17	0.026*
		-29.7	0.286*	0.244*	0.236	0.366	0.144	0.172	0.102	0.17	0.126*
		-29.6	0.286*	0.344*	0.136	0.266	0.244	0.172	0.002	0.07	0.126*
		-29.5	0.286*	0.244*	0.136	0.266	0.244	0.172	0.002	0.07	0.126*
		-29.4	0.286*	0.244*	0.136	0.266	0.144	0.172	0.002	0.07	0.026*
		-29.3	0.286*	0.144*	0.136	0.166	0.144	0.172	0.102	0.17	0.126*
		-29.2	0.186*	0.144*	0.236	0.266	0.044	0.172	0.102	0.17	0.126*
		-29.1	0.186*	0.144*	0.236	0.266	0.044	0.172	0.102	0.17	0.126*
		-29	0.186*	0.144*	0.236	0.266	0.044	0.172	0.102	0.17	0.126*
		-28.9	0.186*	0.144*	0.136	0.166	0.144	0.172	0.102	0.17	0.126*
		-28.8	0.186*	0.244*	0.136	0.166	0.044	0.172	0.002	0.17	0.026*
		-28.7	0.186*	0.244*	0.036	0.166	0.044	0.172	0.002	0.17	0.026*
		-28.6	0.286*	0.244*	0.036	0.266	0.044	0.172	0.102	0.17	0.026*
		-28.5	0.286*	0.244*	0.136	0.266	0.044	0.072	0.202	0.17	0.026*
		-28.4	0.286*	0.244*	0.136	0.266	0.144	0.172	0.202	0.17	0.026*
		-28.3	0.286*	0.244*	0.136	0.266	0.144	0.172	0.202	0.17	0.026*
		-28.2	0.286*	0.344*	0.036	0.166	0.044	0.072	0.202	0.17	0.126*
		-28.1	0.186*	0.244*	0.036	0.166	0.144	0.172	0.102	0.17	0.226*
		-28	0.186*	0.244*	0.036	0.166	0.144	0.172	0.102	0.17	0.126*
		-27.9	0.286*	0.244*	0.136	0.166	0.144	0.172	0.102	0.17	0.126*
		-27.8	0.286*	0.244*	0.136	0.166	0.144	0.172	0.102	0.17	0.126*
		-27.7	0.186*	0.244*	0.136	0.166	0.044	0.072	0.102	0.17	0.126*
		-27.6	0.186*	0.244*	0.136	0.166	0.144	0.172	0.002	0.17	0.126*
		-27.5	0.086*	0.144*	0.136	0.166	0.144	0.172	0.102	0.17	0.126*
		-27.4	0.086*	0.044*	0.136	0.266	0.144	0.172	0.102	0.17	0.226*
		-27.3	0.086*	0.144*	0.136	0.266	0.044	0.072	0.102	0.17	0.126*
		-27.2	0.186*	0.144*	0.136	0.266	0.044	0.072	0.102	0.17	0.026*
		-27.1	0.286*	0.244*	0.136	0.266	0.044	0.072	0.202	0.07	0.026*
		-27	0.186*	0.144*	0.136	0.266	0.244	0.172	0.202	0.17	0.026*
		-26.9	0.186*	0.144*	0.236	0.366	0.244	0.272	0.102	0.07	0.026*
		-26.8	0.186*	0.144*	0.136	0.266	0.144	0.272	0.102	0.07	0.126*
		-26.7	0.286*	0.244*	0.136	0.266	0.144	0.272	0.102	0.07	0.126*
		-26.6	0.286*	0.244*	0.136	0.266	0.044	0.172	0.102	0.07	0.126*
		-26.5	0.286*	0.244*	0.136	0.266	0.044	0.272	0.002	0.07	0.026*
		-26.4	0.186*	0.144*	0.136	0.166	0.044	0.272	0.102	0.17	0.026*
		-26.3	0.186*	0.144*	0.136	0.266	0.144	0.272	0.102	0.17	0.226*
		-26.2	0.286*	0.144*	0.136	0.266	0.144	0.272	0.102	0.17	0.226*
		-26.1	0.186*	0.244*	0.136	0.166	0.044	0.072	0.102	0.17	0.226*
		-26	0.186*	0.244*	0.036	0.166	0.044	0.072	0.202	0.17	0.226*
		-25.9	0.086*	0.144*	0.036	0.166	0.144	0.172	0.202	0.17	0.326*
		-25.8	0.186*	0.144*	0.136	0.266	0.144	0.172	0.102	0.07	0.126*
		-25.7	0.186*	0.144*	0.036	0.166	0.144	0.172	0.102	0.07	0.126*
		-25.6	0.186*	0.144*	0.136	0.266	0.144	0.172	0.202	0.17	0.126*
		-25.5	0.186*	0.244*	0.136	0.266	0.144	0.172	0.202	0.17	0.126*
		-25.4	0.186*	0.244*	0.136	0.266	0.144	0.272	0.202	0.17	0.126*
		-25.3	0.286*	0.144*	0.236	0.366	0.244	0.272	0.102	0.07	0.226*
		-25.2	0.286*	0.144*	0.236	0.366	0.144	0.272	0.102	0.07	0.226*
		-25.1	0.286*	0.144*	0.136	0.266	0.144	0.272	0.102	0.17	0.126*
		-25	0.186*	0.044*	0.136	0.266	0.144	0.272	0.202	0.17	0.126*
		-24.9	0.186*	0.144*	0.136	0.266	0.144	0.272	0.302	0.27	0.226*
		-24.8	0.286*	0.144*	0.136	0.266	0.144	0.272	0.202	0.17	0.226*
		-24.7	0.286*	0.144*	0.136	0.266	0.144	0.272	0.202	0.07	0.226*
		-24.6	0.286*	0.144*	0.136	0.166	0.144	0.272	0.202	0.07	0.126*
		-24.5	0.086*	0.044*	0.136	0.066	0.144	0.272	0.102	0.07	0.126*
		-24.4	0.086*	0.044*	0.136	0.066	0.144	0.272	0.202	0.07	0.126*
		-24.3	0.086*	0.044*	0.136	0.066	0.044	0.172	0.202	0.17	0.026*
		-24.2	0.086*	0.144*	0.136	0.166	0.044	0.172	0.102	0.07	0.126*
		-24.1	0.186*	0.144*	0.036	0.166	0.044	0.172	0.102	0.07	0.026*
		-24	0.086*	0.044*	0.036	0.166	0.044	0.172	0.102	0.07	0.026*
		-23.9	0.186*	0.144*	0.036	0.166	0.044	0.272	0.102	0.07	0.026*
		-23.8	0.186*	0.144*	0.036	0.166	0.044	0.172	0.102	0.07	0.026*
		-23.7	0.186*	0.144*	-0.064	0.066	0.044	0.172	0.102	0.07	-0.074*
		-23.6	0.186*	0.144*	-0.064	0.066	0.044	0.172	0.002	-0.03	-0.074*
		-23.5	0.186*	0.244*	-0.064	0.066	-0.056	0.072	0.002	-0.03	-0.074*
		-23.4	0.086*	0.144*	0.036	0.066	-0.056	0.072	0.002	-0.03	0.026*
		-23.3	0.086*	0.144*	0.136	0.166	0.044	0.172	0.002	-0.03	0.026*
		-23.2	0.086*	0.144*	0.136	0.166	0.044	0.172	0.002	-0.03	0.026*
		-23.1	0.186*	0.144*	0.136	0.166	0.044	0.172	0.002	-0.03	-0.074*
		-23	0.186*	0.144*	0.136	0.166	0.044	0.172	0.002	-0.03	-0.074*
		-22.9	0.086*	-0.056*	0.136	0.166	0.044	0.272	0.002	0.07	-0.074*
		-22.8	0.086*	-0.056*	0.036	0.066	0.044	0.272	0.002	0.07	-0.074*
		-22.7	0.086*	-0.056*	0.036	0.066	-0.056	0.172	0.002	0.07	-0.074*
		-22.6	0.086*	0.044*	0.036	0.066	-0.056	0.172	0.002	-0.03	-0.074*
		-22.5	-0.014*	0.044*	0.036	0.066	-0.056	0.172	0.002	-0.03	-0.074*
		-22.4	-0.014*	0.044*	0.036	0.066	-0.056	0.172	0.002	-0.03	-0.074*
		-22.3	-0.014*	0.044*	0.036	0.066	0.044	0.172	0.002	-0.03	-0.074*
		-22.2	-0.014*	0.044*	0.136	0.066	0.044	0.172	-0.098	-0.03	-0.074*
		-22.1	-0.014*	0.044*	0.136	-0.034	0.044	0.172	-0.098	-0.03	0.026*
		-22	0.086*	0.044*	0.136	-0.034	0.044	0.172	-0.098	0.07	-0.074*
		-21.9	0.086*	0.044*	0.136	-0.034	0.044	0.172	-0.098	0.07	-0.074*
		-21.8	0.086*	0.044*	0.136	0.066	0.044	0.172	0.002	0.17	-0.074*
		-21.7	0.086*	0.044*	0.136	0.066	-0.056	0.272	0.002	0.17	-0.074*
		-21.6	0.086*	0.044*	0.236	0.166	-0.156	0.172	0.002	0.17	-0.074*
		-21.5	0.086*	0.144*	0.136	0.066	-0.156	0.172	-0.098	0.07	-0.074*
		-21.4	0.086*	0.144*	0.136	0.066	-0.156	0.172	-0.098	0.07	-0.074*
		-21.3	0.186*	0.244*	0.136	0.066	-0.156	0.172	-0.098	0.07	-0.074*
		-21.2	0.186*	0.244*	0.136	0.066	-0.056	0.172	-0.098	0.07	-0.074*
		-21.1	-0.014*	0.144*	0.236	0.066	-0.056	0.072	-0.098	0.07	-0.074*
		-21	-0.014*	0.144*	0.136	0.066	-0.056	0.072	0.002	0.07	-0.074*
		-20.9	0.086*	0.144*	0.136	0.066	-0.056	0.072	0.002	0.07	-0.074*
		-20.8	0.086*	0.144*	0.136	0.066	-0.056	0.072	0.002	0.07	-0.074*
		-20.7	0.086*	0.144*	0.136	0.166	0.044	0.172	0.002	0.07	-0.074*
		-20.6	0.086*	0.144*	0.136	0.166	0.044	0.172	0.002	0.07	-0.074*
		-20.5	0.086*	0.144*	0.036	0.066	-0.056	0.172	0.002	0.07	-0.074*
		-20.4	0.086*	0.144*	0.036	0.066	-0.056	0.172	0.002	0.07	-0.074*
		-20.3	0.086*	0.244*	0.036	0.066	-0.056	0.172	-0.098	-0.03	-0.074*
		-20.2	0.086*	0.144*	0.136	0.066	-0.056	0.172	-0.098	-0.03	-0.074*
		-20.1	0.086*	0.144*	0.136	0.066	-0.056	0.172	-0.098	-0.03	-0.074*
		-20	0.086*	0.044*	0.136	-0.034	-0.056	0.172	-0.098	-0.03	-0.074*
		-19.9	0.086*	0.044*	0.136	-0.034	-0.056	0.172	-0.098	-0.03	-0.074*
		-19.8	0.086*	0.044*	0.136	-0.034	-0.056	0.172	-0.098	0.07	-0.074*
		-19.7	0.086*	0.044*	0.136	0.066	0.044	0.172	0.002	0.07	-0.074*
		-19.6	-0.014*	0.044*	0.036	-0.034	0.044	0.172	0.002	0.07	-0.074*
		-19.5	-0.014*	0.044*	-0.064	-0.034	0.044	0.172	0.002	0.07	-0.074*
		-19.4	-0.014*	0.044*	-0.064	-0.034	0.044	0.172	0.102	0.17	-0.074*
		-19.3	0.086*	0.144*	-0.064	-0.034	-0.056	-0.028	0.102	0.17	-0.074*
		-19.2	0.086*	0.144*	0.036	0.066	-0.056	-0.028	0.102	0.17	0.026*
		-19.1	0.086*	0.144*	0.036	0.066	-0.156	-0.028	0.102	0.07	0.126*
		-19	0.086*	0.144*	0.036	0.066	-0.156	-0.028	0.102	0.07	0.126*
		-18.9	0.086*	0.144*	0.036	0.066	-0.156	-0.028	0.102	0.07	0.126*
		-18.8	0.086*	0.144*	0.036	0.066	-0.156	-0.028	0.102	0.07	0.126*
		-18.7	0.086*	0.144*	0.036	0.066	-0.156	-0.028	0.102	0.07	0.126*
		-18.6	-0.014*	0.044*	0.036	0.066	-0.156	-0.028	0.102	0.07	0.126*
		-18.5	-0.014*	0.044*	-0.064	-0.034	-0.056	0.072	0.102	0.07	0.126*
		-18.4	-0.014*	0.044*	-0.064	-0.034	-0.056	0.072	0.102	0.07	0.126*
		-18.3	-0.014*	0.044*	-0.064	-0.034	-0.056	0.072	0.102	0.07	0.126*
		-18.2	-0.014*	0.044*	-0.064	-0.034	-0.056	0.072	0.102	0.07	0.026*
		-18.1	-0.014*	0.044*	-0.064	-0.034	-0.056	0.072	0.102	0.07	0.026*
		-18	0.086*	0.044*	-0.064	-0.034	-0.056	0.072	0.102	0.07	0.026*
		-17.9	0.086*	0.044*	-0.064	-0.034	-0.056	0.072	0.002	0.07	0.026*
		-17.8	0.086*	0.044*	-0.064	-0.034	-0.056	0.072	0.002	0.07	-0.074*
		-17.7	0.086*	0.044*	-0.064	-0.034	-0.056	0.072	0.002	0.07	-0.074*
		-17.6	-0.014*	-0.056*	0.036	0.066	-0.056	0.072	0.002	0.07	-0.074*
		-17.5	-0.014*	-0.056*	0.036	0.066	-0.056	0.072	-0.098	0.07	-0.074*
		-17.4	-0.114*	-0.056*	-0.064	0.066	-0.056	0.072	-0.098	-0.03	-0.074*
		-17.3	-0.014*	0.044*	-0.064	0.066	-0.056	0.072	-0.098	-0.03	-0.074*
		-17.2	-0.014*	0.044*	-0.064	0.066	-0.056	-0.028	-0.098	-0.03	-0.074*
		-17.1	-0.014*	0.044*	-0.064	0.066	-0.056	-0.028	0.002	0.07	-0.074*
		-17	-0.014*	0.044*	-0.064	-0.034	-0.056	-0.028	0.002	0.07	-0.074*
		-16.9	-0.014*	0.044*	-0.064	-0.034	0.044	0.072	0.002	0.07	-0.074*
		-16.8	-0.014*	0.044*	-0.064	-0.034	0.044	0.072	0.002	0.07	0.126*
		-16.7	-0.014*	0.044*	-0.064	-0.034	0.044	0.072	0.002	0.07	0.126*
		-16.6	-0.014*	0.044*	-0.064	-0.034	0.044	0.072	0.002	0.07	0.126*
		-16.5	-0.014*	0.044*	-0.064	-0.034	0.044	0.072	0.002	-0.03	0.126*
		-16.4	-0.014*	0.044*	-0.064	-0.034	0.044	0.072	0.002	-0.03	0.126*
		-16.3	-0.014*	0.044*	-0.064	-0.034	0.044	-0.028	0.002	-0.03	0.126*
		-16.2	-0.014*	0.044*	-0.064	-0.034	0.044	-0.028	0.002	-0.03	0.026*
		-16.1	-0.014*	0.044*	-0.064	-0.034	-0.056	-0.028	0.002	-0.03	0.026*
		-16	-0.014*	0.044*	-0.064	-0.134	-0.056	-0.028	0.002	-0.03	0.026*
		-15.9	-0.014*	0.044*	-0.064	-0.134	-0.056	-0.028	0.002	-0.03	0.026*
		-15.8	-0.014*	0.044*	-0.064	-0.134	-0.056	-0.028	-0.098	-0.03	0.026*
		-15.7	-0.014*	0.044*	0.036	-0.034	-0.056	-0.028	-0.098	-0.03	0.026*
		-15.6	-0.014*	0.044*	0.036	-0.034	-0.056	-0.028	-0.098	-0.13	0.026*
		-15.5	-0.014*	0.044*	0.036	-0.034	-0.056	-0.028	-0.098	-0.13	0.026*
		-15.4	-0.014*	0.044*	0.036	-0.034	-0.156	-0.028	-0.098	-0.13	0.026*
		-15.3	-0.014*	0.044*	0.036	-0.034	-0.156	-0.028	-0.098	-0.13	0.026*
		-15.2	-0.014*	-0.056*	-0.064	-0.034	-0.156	-0.028	-0.098	-0.13	0.026*
		-15.1	-0.014*	-0.056*	-0.064	-0.034	-0.156	-0.028	-0.198	-0.13	0.026*
		-15	0.086*	0.044*	-0.064	-0.034	-0.156	-0.028	-0.198	-0.13	0.026*
		-14.9	0.086*	0.044*	-0.064	-0.134	-0.156	-0.028	-0.198	-0.13	0.026*
		-14.8	0.086*	-0.056*	-0.064	-0.134	-0.156	-0.028	-0.098	-0.03	0.126*
		-14.7	0.086*	-0.056*	-0.064	-0.134	-0.156	-0.028	-0.098	-0.03	0.126*
		-14.6	0.086*	-0.056*	-0.064	-0.134	-0.156	-0.028	-0.098	-0.03	0.026*
		-14.5	0.086*	-0.056*	-0.064	-0.134	-0.156	-0.028	-0.098	-0.03	0.026*
		-14.4	0.086*	-0.056*	0.036	-0.034	-0.156	-0.028	-0.098	-0.03	0.026*
		-14.3	0.086*	-0.056*	0.036	-0.034	-0.156	-0.028	-0.098	-0.03	0.026*
		-14.2	-0.014*	-0.056*	0.036	-0.034	-0.156	-0.128	-0.098	-0.03	0.026*
		-14.1	-0.014*	-0.056*	0.036	-0.034	-0.156	-0.128	-0.098	-0.03	0.026*
		-14	-0.014*	-0.056*	0.036	-0.034	-0.156	-0.128	-0.098	-0.13	0.026*
		-13.9	-0.014*	-0.056*	0.036	-0.034	-0.156	-0.128	-0.098	-0.13	0.026*
		-13.8	-0.014*	-0.056*	0.036	-0.034	-0.156	-0.228	-0.098	-0.13	0.126*
		-13.7	-0.014*	-0.056*	-0.064	-0.034	-0.156	-0.228	-0.098	-0.13	0.126*
		-13.6	-0.014*	-0.056*	-0.064	-0.034	-0.156	-0.228	-0.098	-0.13	0.126*
		-13.5	-0.014*	-0.056*	-0.064	-0.134	-0.156	-0.228	-0.098	-0.13	0.126*
		-13.4	0.086*	0.044*	-0.064	-0.134	-0.156	-0.228	-0.098	-0.13	0.126*
		-13.3	0.086*	0.044*	-0.064	-0.134	-0.156	-0.228	-0.098	-0.13	0.126*
		-13.2	0.086*	0.044*	-0.064	-0.134	-0.056	-0.128	-0.198	-0.13	0.126*
		-13.1	-0.014*	0.044*	0.036	-0.034	-0.056	-0.028	-0.198	-0.13	0.126*
		-13	-0.014*	0.044*	0.036	-0.034	-0.056	-0.028	-0.198	-0.13	0.126*
		-12.9	-0.014*	0.044*	0.036	-0.034	-0.056	-0.028	-0.098	-0.03	0.126*
		-12.8	-0.014*	0.044*	0.036	-0.034	-0.056	-0.028	-0.098	-0.03	0.026*
		-12.7	-0.014*	-0.056*	0.036	-0.034	-0.056	-0.028	-0.098	-0.03	0.026*
		-12.6	-0.014*	-0.056*	0.036	-0.034	-0.056	-0.028	-0.098	-0.03	0.026*
		-12.5	-0.014*	-0.056*	0.036	-0.034	-0.156	-0.028	-0.098	-0.03	0.026*
		-12.4	-0.014*	-0.056*	-0.064	-0.034	-0.156	-0.128	-0.098	-0.13	0.026*
		-12.3	-0.014*	-0.056*	-0.064	-0.034	-0.156	-0.128	-0.098	-0.13	0.026*
		-12.2	-0.014*	-0.056*	-0.064	-0.034	-0.156	-0.128	-0.198	-0.13	0.026*
		-12.1	-0.014*	-0.056*	-0.064	-0.034	-0.156	-0.128	-0.198	-0.13	0.126*
		-12	-0.014*	-0.056*	-0.064	-0.034	-0.156	-0.128	-0.198	-0.13	0.126*
		-11.9	-0.014*	-0.156*	-0.064	-0.034	-0.156	-0.128	-0.198	-0.13	0.126*
		-11.8	-0.014*	-0.156*	-0.064	-0.034	-0.156	-0.128	-0.198	-0.13	0.126*
		-11.7	-0.014*	-0.156*	-0.064	-0.034	-0.056	-0.028	-0.198	-0.13	0.126*
		-11.6	-0.014*	-0.156*	-0.064	-0.034	-0.056	-0.028	-0.198	-0.13	0.126*
		-11.5	0.086*	-0.056*	-0.064	-0.134	-0.056	-0.028	-0.198	-0.13	0.126*
		-11.4	-0.014*	-0.056*	-0.064	-0.134	-0.056	-0.028	-0.098	-0.03	-0.074*
		-11.3	-0.014*	-0.056*	0.036	-0.034	-0.056	-0.028	-0.098	-0.03	-0.074*
		-11.2	-0.014*	-0.056*	0.036	-0.034	-0.056	-0.028	-0.098	-0.03	-0.074*
		-11.1	-0.014*	-0.056*	0.036	-0.034	-0.056	-0.028	-0.098	-0.03	-0.074*
		-11	-0.014*	-0.056*	0.036	0.066	-0.056	-0.028	-0.098	-0.13	-0.074*
		-10.9	-0.014*	-0.056*	0.036	-0.034	-0.056	-0.028	-0.098	-0.13	-0.074*
		-10.8	-0.014*	-0.056*	0.036	-0.034	-0.056	-0.028	-0.098	-0.13	-0.074*
		-10.7	-0.014*	-0.056*	0.036	-0.034	-0.056	-0.028	-0.098	-0.13	0.026*
		-10.6	-0.014*	-0.056*	0.036	-0.034	-0.056	-0.028	-0.098	-0.13	0.026*
		-10.5	0.086*	0.044*	0.036	-0.034	-0.056	-0.028	-0.098	-0.13	0.026*
		-10.4	0.086*	0.044*	0.036	-0.034	-0.056	-0.028	-0.098	-0.13	0.026*
		-10.3	0.086*	0.044*	0.036	-0.034	-0.056	-0.028	-0.098	-0.13	0.026*
		-10.2	0.086*	0.044*	0.036	-0.034	0.044	0.072	-0.098	-0.13	0.026*
		-10.1	0.086*	0.044*	0.036	-0.034	0.044	0.072	-0.098	-0.13	0.026*
		-10	0.086*	0.044*	0.036	-0.034	0.044	0.072	-0.098	-0.13	0.026*
		-9.9	0.086*	0.044*	0.036	-0.034	0.044	0.072	-0.098	-0.13	0.026*
		-9.8	0.086*	0.044*	0.036	-0.034	0.044	-0.028	-0.098	-0.13	0.026*
		-9.7	0.086*	0.044*	0.036	-0.034	0.044	-0.028	-0.098	-0.13	0.026*
		-9.6	0.086*	0.044*	0.036	-0.034	0.044	-0.028	-0.098	-0.23	0.026*
		-9.5	-0.014*	-0.056*	-0.064	-0.034	-0.056	-0.028	0.002	-0.13	0.026*
		-9.4	-0.014*	-0.056*	-0.064	-0.034	-0.056	-0.028	0.002	-0.03	0.026*
		-9.3	-0.014*	-0.056*	-0.064	-0.034	-0.056	-0.028	0.002	-0.03	0.026*
		-9.2	-0.014*	-0.056*	-0.064	-0.034	-0.056	-0.028	0.002	-0.03	-0.074*
		-9.1	-0.014*	-0.056*	-0.064	-0.034	-0.056	-0.028	0.002	-0.03	-0.074*
		-9	-0.014*	-0.056*	-0.064	-0.034	-0.056	-0.028	0.002	-0.03	-0.074*
		-8.9	-0.014*	-0.056*	-0.064	-0.034	-0.056	-0.028	-0.098	-0.03	-0.074*
		-8.8	-0.014*	-0.056*	-0.064	-0.034	-0.056	-0.028	-0.098	-0.03	-0.074*
		-8.7	-0.014*	-0.056*	-0.064	-0.034	-0.056	-0.028	-0.098	-0.03	-0.074*
		-8.6	-0.014*	-0.056*	-0.064	-0.034	-0.056	-0.028	-0.098	-0.03	0.026*
		-8.5	-0.014*	-0.056*	-0.064	-0.034	-0.056	-0.028	-0.098	-0.03	0.026*
		-8.4	-0.014*	-0.056*	0.036	0.066	0.044	0.072	-0.098	-0.03	0.026*
		-8.3	-0.014*	-0.056*	0.036	0.066	0.044	0.072	-0.098	-0.03	0.026*
		-8.2	-0.014*	-0.056*	0.036	0.066	0.044	0.072	0.002	0.07	0.026*
		-8.1	-0.014*	-0.056*	0.036	0.066	0.044	0.072	0.002	0.07	0.026*
		-8	-0.014*	-0.056*	0.036	0.066	0.044	0.072	0.002	0.07	0.026*
		-7.9	-0.014*	-0.056*	0.036	0.066	0.044	0.072	0.002	0.07	0.026*
		-7.8	0.086*	0.044*	0.036	0.066	0.044	0.072	0.002	0.07	0.026*
		-7.7	0.086*	0.044*	0.036	0.066	0.044	0.072	0.002	0.07	0.026*
		-7.6	0.086*	0.044*	0.036	0.066	0.044	0.072	0.002	-0.03	0.026*
		-7.5	0.086*	0.044*	0.036	0.066	0.044	0.072	0.002	-0.03	0.026*
		-7.4	0.086*	0.044*	0.036	0.066	0.044	0.072	0.002	-0.03	0.026*
		-7.3	0.086*	0.044*	0.036	0.066	0.044	0.072	0.002	-0.03	0.026*
		-7.2	0.086*	0.044*	0.036	0.066	0.044	0.072	0.002	-0.03	0.026*
		-7.1	0.086*	0.044*	0.036	0.066	0.044	0.072	0.002	-0.03	0.026*
		-7	0.086*	0.044*	0.036	0.066	0.044	0.072	0.002	-0.03	0.026*
		-6.9	-0.014*	0.044*	0.036	0.066	0.044	0.072	0.002	-0.13	0.026*
		-6.8	-0.014*	0.044*	0.036	0.066	0.044	0.072	0.002	-0.13	0.026*
		-6.7	-0.014*	0.044*	0.036	0.066	0.044	0.072	0.002	-0.03	0.026*
		-6.6	-0.014*	0.044*	0.036	0.066	0.044	0.072	0.002	-0.03	0.026*
		-6.5	-0.014*	0.044*	0.036	0.066	0.044	-0.028	0.002	-0.03	0.026*
		-6.4	-0.014*	0.044*	0.036	0.066	0.044	-0.028	0.002	-0.13	0.026*
		-6.3	-0.014*	0.044*	-0.064	-0.034	0.044	-0.028	0.002	-0.03	0.026*
		-6.2	-0.014*	0.044*	-0.064	-0.034	0.044	-0.028	0.102	0.07	0.026*
		-6.1	-0.014*	0.044*	-0.064	-0.034	-0.056	-0.028	0.102	0.07	0.026*
		-6	-0.014*	0.044*	-0.064	-0.034	-0.056	-0.028	0.102	0.07	0.026*
		-5.9	-0.114*	0.044*	-0.064	-0.034	-0.056	-0.028	0.102	0.07	0.026*
		-5.8	-0.114*	0.044*	-0.064	-0.034	-0.056	-0.028	0.002	0.07	-0.074*
		-5.7	-0.014*	0.044*	-0.064	-0.134	-0.056	-0.128	0.102	0.17	0.026*
		-5.6	-0.014*	0.044*	-0.064	-0.134	-0.056	-0.128	0.102	0.17	-0.074*
		-5.5	-0.114*	-0.056*	-0.064	-0.134	-0.056	-0.128	0.102	0.17	-0.074*
		-5.4	-0.114*	-0.056*	-0.064	-0.134	-0.056	-0.128	0.102	0.17	-0.074*
		-5.3	-0.114*	-0.056*	0.136	-0.034	-0.056	-0.128	0.102	0.17	-0.074*
		-5.2	-0.114*	-0.056*	0.136	-0.034	-0.056	-0.128	0.102	0.17	-0.074*
		-5.1	-0.114*	-0.056*	0.136	-0.034	-0.056	-0.128	0.102	0.17	-0.074*
		-5	-0.114*	-0.056*	0.136	-0.034	-0.056	-0.128	0.102	0.17	-0.074*
		-4.9	-0.114*	-0.056*	0.136	-0.034	-0.056	-0.128	0.102	0.17	0.026*
		-4.8	-0.114*	-0.056*	0.236	0.066	-0.056	-0.128	0.102	0.17	0.026*
		-4.7	-0.114*	-0.056*	0.236	0.066	-0.056	-0.228	0.102	0.17	-0.074*
		-4.6	-0.114*	-0.056*	0.236	0.066	-0.056	-0.228	0.102	0.17	-0.074*
		-4.5	-0.114*	-0.156*	0.236	0.066	-0.056	-0.228	0.102	0.07	-0.074*
		-4.4	-0.114*	-0.156*	0.336	0.166	-0.156	-0.228	0.002	0.07	0.026*
		-4.3	-0.214*	-0.156*	0.236	0.066	-0.156	-0.328	0.002	0.07	0.026*
		-4.2	-0.214*	-0.156*	0.136	0.066	-0.156	-0.328	0.002	-0.03	-0.074*
		-4.1	-0.114*	-0.056*	0.036	-0.034	-0.156	-0.328	-0.098	-0.03	0.026*
		-4	-0.014*	0.044*	0.036	-0.034	-0.156	-0.228	0.002	0.07	0.026*
		-3.9	-0.014*	0.044*	0.136	0.066	-0.156	-0.328	0.002	-0.03	0.126*
		-3.8	0.086*	0.044*	0.036	-0.034	-0.056	-0.228	0.102	0.07	0.126*
		-3.7	0.086*	0.044*	0.036	-0.034	-0.156	-0.228	0.202	0.17	0.026*
		-3.6	-0.014*	0.044*	-0.064	-0.034	-0.056	-0.128	0.102	0.07	0.126*
		-3.5	0.086*	0.144*	-0.064	-0.134	0.044	-0.028	0.202	0.17	0.126*
		-3.4	0.086*	0.044*	-0.064	-0.034	0.044	-0.028	0.302	0.17	0.126*
		-3.3	0.186*	0.144*	0.036	0.066	0.044	-0.028	0.302	0.27	0.126*
		-3.2	0.186*	0.144*	-0.064	-0.034	0.044	0.072	0.302	0.27	0.126*
		-3.1	0.286*	0.144*	-0.064	-0.034	0.144	0.172	0.402	0.37	0.326*
		-3	0.286*	0.144*	-0.064	-0.034	0.144	0.072	0.302	0.27	0.226*
		-2.9	0.286*	0.244*	-0.064	-0.034	0.144	0.172	0.302	0.27	0.226*
		-2.8	0.286*	0.144*	-0.064	-0.034	0.044	0.172	0.302	0.17	0.226*
		-2.7	0.286*	0.144*	-0.164	-0.034	0.044	0.172	0.202	0.17	0.226*
		-2.6	0.286*	0.144*	-0.164	-0.034	-0.056	0.072	0.202	0.17	0.226*
		-2.5	0.086*	0.144*	-0.064	0.066	0.044	0.072	0.202	0.17	0.226*
		-2.4	0.086*	0.144*	-0.164	-0.034	-0.056	0.072	0.202	0.17	0.226*
		-2.3	0.186*	0.144*	-0.164	-0.034	-0.056	0.072	0.202	0.17	0.126*
		-2.2	0.186*	0.044*	-0.164	-0.034	-0.056	0.072	0.102	0.07	0.226*
		-2.1	0.186*	0.044*	-0.164	-0.034	-0.056	0.072	0.102	0.07	0.226*
		-2	0.186*	0.044*	-0.164	-0.034	-0.056	0.072	0.102	0.07	0.126*
		-1.9	0.186*	0.044*	-0.164	-0.034	0.044	0.072	0.002	0.07	0.126*
		-1.8	0.186*	0.144*	-0.164	-0.034	-0.056	-0.028	0.002	-0.03	0.126*
		-1.7	0.086*	0.044*	-0.164	0.066	0.044	0.072	0.002	-0.03	0.226*
		-1.6	0.186*	0.144*	-0.164	0.066	-0.056	0.072	0.002	-0.03	0.226*
		-1.5	0.186*	0.244*	-0.264	-0.034	-0.056	-0.028	0.002	-0.03	0.226*
		-1.4	0.086*	0.144*	-0.364	-0.034	-0.056	-0.028	0.002	-0.03	0.226*
		-1.3	0.086*	0.144*	-0.264	-0.034	-0.056	-0.028	0.002	-0.03	0.226*
		-1.2	0.086*	0.144*	-0.264	-0.034	-0.056	-0.028	0.002	-0.03	0.126*
		-1.1	-0.014*	0.144*	-0.464	-0.134	-0.056	0.072	0.002	-0.03	0.226*
		-1	-0.014*	0.044*	-0.464	-0.334	0.244	0.172	0.102	0.07	0.226*
		-0.9	0.086*	0.244*	-0.364	-0.234	0.144	0.072	-0.198	-0.03	0.226*
		-0.8	-0.514*	-0.456*	-2.364	-1.234	-1.056	-1.228	-2.098	-1.53	-1.874*
		-0.7	-0.314*	-0.256*	-1.364	-0.334	-0.856	-1.128	-1.498	-0.23	-0.474*
		-0.6	-0.114*	-0.056*	-0.764	-0.134	-0.056	-0.228	-0.698	-0.43	-0.274*
		-0.5	-0.114*	0.144*	-0.564	0.066	0.044	-0.428	0.002	0.07	0.226*
		-0.4	-0.114*	0.144*	-0.464	0.266	0.144	-0.228	0.102	0.07	0.026*
		-0.3	0.186*	0.144*	-0.464	0.166	0.244	-0.028	0.402	0.37	0.426*
		-0.2	0.286*	0.344*	0.636	0.766	0.344	0.272	0.402	0.77	0.526*
		-0.1	0.486*	0.944*	0.836	1.166	1.344	1.072	1.602	2.37	1.926*
		0	1.486*	1.644*	1.236	-1.034	1.944	2.272	4.602	0.57	4.426*
		0.1	0.086*	0.244*	0.736	-4.034	-0.556	-2.428	-2.998	-23.33	4.426*
		0.2	-0.714*	-0.656*	-0.064	-3.734	-3.856	-7.928	-12.798	-30.73	3.826*
		0.3	-1.014*	-1.056*	-0.264	-3.534	-4.456	-8.828	-14.298	-29.43	2.726*
		0.4	-1.214*	-1.056*	-0.764	-3.134	-4.356	-8.528	-13.698	-26.33	1.926*
		0.5	-1.314*	-1.456*	-0.564	-2.734	-4.356	-7.828	-12.698	-23.03	0.926*
		0.6	-1.114*	-1.256*	-0.764	-2.234	-4.056	-6.928	-11.098	-19.93	0.526*
		0.7	-0.914*	-0.756*	-1.064	-2.234	-3.056	-5.728	-9.298	-16.63	0.426*
		0.8	-0.914*	-0.456*	-0.764	-2.034	-2.556	-4.628	-7.798	-13.73	0.326*
		0.9	-1.014*	-0.756*	-0.364	-1.434	-2.356	-3.928	-6.298	-11.13	0.226*
		1	-0.814*	-0.856*	-0.264	-0.934	-1.956	-3.028	-5.098	-8.83	0.326*
		1.1	-0.814*	-0.556*	0.136	-0.534	-1.656	-2.428	-3.698	-6.83	0.426*
		1.2	-0.414*	-0.256*	0.136	-0.334	-1.156	-1.528	-2.898	-5.13	0.226*
		1.3	-0.014*	0.044*	0.236	-0.334	-0.856	-0.928	-1.598	-3.43	0.126*
		1.4	-0.114*	-0.056*	0.236	-0.234	-0.456	-0.428	-0.798	-2.03	0.426*
		1.5	-0.114*	0.244*	0.436	-0.134	-0.056	-0.028	0.002	-0.53	0.726*
		1.6	-0.214*	0.244*	0.436	0.166	0.044	0.572	0.702	0.57	0.826*
		1.7	0.086*	0.544*	0.436	0.366	0.344	0.772	1.202	1.27	0.826*
		1.8	0.286*	0.544*	0.536	0.366	0.544	1.172	2.002	2.17	0.726*
		1.9	0.186*	0.444*	0.836	0.766	0.844	1.672	2.302	2.97	0.826*
		2	0.286*	0.644*	0.836	0.766	0.744	1.772	2.602	3.37	0.626*
		2.1	0.286*	0.644*	0.936	0.866	0.744	1.972	3.002	3.97	0.726*
		2.2	0.386*	0.744*	0.936	0.966	0.944	2.172	3.202	4.37	0.726*
		2.3	0.386*	0.744*	1.136	0.966	1.044	2.372	3.702	4.97	0.726*
		2.4	0.386*	0.644*	1.136	1.066	1.344	2.672	4.002	5.37	0.726*
		2.5	0.486*	0.744*	1.236	1.166	1.444	2.872	4.202	5.67	0.726*
		2.6	0.586*	0.744*	1.336	1.166	1.544	2.972	4.502	6.07	0.726*
		2.7	0.586*	0.744*	1.336	1.366	1.444	2.972	4.702	6.47	0.726*
		2.8	0.686*	0.944*	1.236	1.366	1.544	3.172	4.802	6.77	0.726*
		2.9	0.586*	0.844*	1.036	1.366	1.444	3.172	5.002	7.07	0.726*
		3	0.786*	1.044*	1.236	1.366	1.444	3.272	5.202	7.17	0.726*
		3.1	0.586*	0.844*	1.336	1.466	1.644	3.472	5.402	7.37	0.726*
		3.2	0.586*	0.944*	1.236	1.366	1.644	3.472	5.402	7.67	0.926*
		3.3	0.586*	0.944*	1.236	1.466	1.744	3.672	5.402	7.77	1.026*
		3.4	0.686*	0.944*	1.236	1.366	1.844	3.872	5.602	7.97	1.126*
		3.5	0.586*	0.844*	1.236	1.566	1.844	3.872	5.602	8.27	1.026*
		3.6	0.586*	0.844*	1.336	1.566	1.944	3.972	5.802	8.17	0.926*
		3.7	0.586*	0.844*	1.236	1.566	2.044	4.072	5.802	8.27	0.826*
		3.8	0.486*	0.744*	1.236	1.666	2.044	4.272	5.902	8.57	0.926*
		3.9	0.486*	0.744*	1.436	1.766	2.244	4.372	6.102	8.47	0.926*
		4	0.686*	0.944*	1.336	1.766	2.144	4.472	6.202	8.57	0.826*
		4.1	0.686*	0.844*	1.436	1.966	2.244	4.472	6.202	8.67	0.726*
		4.2	0.686*	0.944*	1.436	1.966	2.344	4.572	6.402	8.87	0.726*
		4.3	0.686*	0.944*	1.536	2.066	2.344	4.672	6.502	8.97	0.726*
		4.4	0.686*	0.944*	1.636	2.066	2.344	4.672	6.602	8.97	0.826*
		4.5	0.786*	0.944*	1.536	2.066	2.344	4.772	6.702	9.17	0.626*
		4.6	0.786*	0.944*	1.536	1.966	2.444	4.872	6.802	9.27	0.726*
		4.7	0.586*	0.844*	1.536	2.066	2.444	4.972	7.002	9.37	0.626*
		4.8	0.686*	0.944*	1.536	2.066	2.544	4.972	7.002	9.37	0.626*
		4.9	0.686*	0.944*	1.536	2.066	2.544	4.972	7.102	9.57	0.526*
		5	0.686*	0.944*	1.436	1.966	2.644	5.272	7.202	9.57	0.726*
		5.1	0.686*	1.044*	1.336	1.966	2.644	5.172	7.302	9.77	0.726*
		5.2	0.686*	1.044*	1.436	2.066	2.744	5.272	7.402	9.77	0.726*
		5.3	0.786*	1.144*	1.336	2.066	2.744	5.372	7.402	9.77	0.626*
		5.4	0.686*	1.044*	1.236	2.066	2.844	5.572	7.502	9.87	0.626*
		5.5	0.686*	1.044*	1.336	2.166	2.744	5.472	7.502	9.77	0.826*
		5.6	0.786*	1.044*	1.336	2.266	2.944	5.572	7.602	9.87	0.726*
		5.7	0.686*	1.044*	1.436	2.266	2.844	5.572	7.502	9.77	0.726*
		5.8	0.686*	0.944*	1.336	2.266	2.844	5.572	7.702	9.77	0.726*
		5.9	0.686*	1.044*	1.336	2.266	2.844	5.572	7.702	9.97	0.726*
		6	0.686*	1.044*	1.436	2.166	2.944	5.672	7.802	9.87	0.726*
		6.1	0.786*	1.144*	1.436	2.366	2.844	5.672	7.902	9.97	0.826*
		6.2	0.886*	1.044*	1.536	2.366	3.044	5.872	7.802	9.97	0.726*
		6.3	0.786*	1.144*	1.536	2.366	2.944	5.772	7.902	10.07	0.826*
		6.4	0.786*	1.144*	1.436	2.266	3.144	5.972	7.902	9.97	0.726*
		6.5	0.786*	1.144*	1.536	2.366	2.944	5.872	7.902	10.07	0.826*
		6.6	0.786*	1.044*	1.436	2.266	3.144	6.072	8.002	10.07	0.826*
		6.7	0.786*	1.144*	1.536	2.466	3.144	6.072	8.002	10.07	0.826*
		6.8	0.886*	1.144*	1.636	2.366	3.244	6.072	8.002	10.17	0.726*
		6.9	0.986*	1.244*	1.536	2.366	3.144	6.072	8.002	10.17	0.726*
		7	0.886*	1.144*	1.636	2.266	3.244	6.172	8.102	10.17	0.826*
		7.1	0.986*	1.144*	1.536	2.366	3.344	6.272	8.302	10.27	0.726*
		7.2	0.886*	1.144*	1.636	2.466	3.244	6.272	8.302	10.27	0.826*
		7.3	0.786*	1.144*	1.736	2.466	3.344	6.372	8.402	10.37	0.726*
		7.4	0.886*	1.144*	1.636	2.366	3.444	6.372	8.302	10.37	0.726*
		7.5	0.886*	1.244*	1.736	2.566	3.344	6.372	8.402	10.37	0.726*
		7.6	0.786*	1.044*	1.736	2.466	3.444	6.472	8.402	10.37	0.726*
		7.7	0.886*	1.244*	1.636	2.466	3.544	6.572	8.402	10.47	0.826*
		7.8	0.786*	1.144*	1.736	2.566	3.444	6.472	8.502	10.37	0.726*
		7.9	0.786*	1.144*	1.836	2.566	3.444	6.472	8.502	10.47	0.826*
		8	0.786*	1.144*	1.636	2.466	3.644	6.572	8.502	10.47	0.726*
		8.1	0.786*	1.244*	1.736	2.666	3.644	6.572	8.702	10.57	0.726*
		8.2	0.686*	1.044*	1.836	2.666	3.544	6.572	8.702	10.57	0.726*
		8.3	0.786*	1.144*	1.636	2.566	3.644	6.672	8.702	10.57	0.726*
		8.4	0.786*	1.244*	1.836	2.666	3.644	6.672	8.702	10.67	0.626*
		8.5	0.786*	1.144*	1.836	2.766	3.744	6.772	8.802	10.57	0.726*
		8.6	0.686*	1.144*	1.736	2.566	3.744	6.872	8.802	10.47	0.626*
		8.7	0.786*	1.144*	1.836	2.766	3.744	6.872	8.902	10.67	0.626*
		8.8	0.786*	1.344*	1.836	2.766	3.744	6.772	8.802	10.57	0.726*
		8.9	0.786*	1.144*	1.836	2.766	3.744	6.872	8.902	10.57	0.726*
		9	0.786*	1.244*	1.936	2.866	3.744	6.972	9.002	10.57	0.726*
		9.1	0.886*	1.344*	1.836	2.766	3.844	6.972	9.002	10.67	0.726*
		9.2	0.786*	1.144*	1.936	2.766	3.844	7.072	9.002	10.67	0.626*
		9.3	0.786*	1.244*	1.936	2.966	3.844	6.972	8.902	10.57	0.726*
		9.4	0.786*	1.144*	1.936	2.866	3.844	7.072	9.002	10.67	0.726*
		9.5	0.886*	1.344*	1.936	2.866	4.044	7.072	9.002	10.57	0.726*
		9.6	0.886*	1.344*	2.036	2.866	3.944	7.072	9.002	10.67	0.726*
		9.7	0.786*	1.244*	1.836	2.866	3.944	7.172	8.902	10.47	0.826*
		9.8	0.886*	1.344*	1.936	2.966	4.044	7.072	9.002	10.67	0.726*
		9.9	0.886*	1.244*	1.836	2.866	4.144	7.072	9.002	10.67	0.626*
		10	0.986*	1.344*	1.936	2.866	4.244	7.172	9.002	10.67	0.826*
		10.1	0.986*	1.344*	1.836	2.866	4.044	7.172	9.002	10.67	0.626*
		10.2	0.886*	1.344*	1.936	2.966	4.244	7.272	9.102	10.67	0.726*
		10.3	1.086*	1.344*	1.836	2.866	4.244	7.172	9.102	10.77	0.726*
		10.4	0.986*	1.344*	1.936	2.966	4.144	7.272	9.102	10.77	0.726*
		10.5	0.986*	1.344*	1.836	2.866	4.244	7.372	9.102	10.77	0.726*
		10.6	0.986*	1.244*	1.936	3.066	4.244	7.472	9.102	10.77	0.826*
		10.7	1.086*	1.344*	2.036	3.066	4.244	7.472	9.202	10.77	0.826*
		10.8	0.986*	1.344*	1.936	2.966	4.144	7.272	9.102	10.77	0.726*
		10.9	1.086*	1.444*	2.036	3.066	4.244	7.372	9.302	10.77	0.826*
		11	0.986*	1.344*	2.036	3.066	4.244	7.472	9.302	10.77	0.826*
		11.1	1.086*	1.444*	2.036	3.166	4.144	7.372	9.302	10.77	0.926*
		11.2	0.986*	1.244*	1.936	3.066	4.244	7.372	9.302	10.67	0.726*
		11.3	0.986*	1.344*	2.036	3.066	4.044	7.372	9.402	10.87	0.826*
		11.4	0.986*	1.344*	2.036	3.166	4.244	7.472	9.402	10.87	0.826*
		11.5	1.086*	1.444*	1.936	3.166	4.244	7.472	9.402	10.77	0.826*
		11.6	0.886*	1.344*	1.936	3.166	4.244	7.572	9.402	10.67	0.726*
		11.7	0.986*	1.344*	2.036	3.166	4.144	7.372	9.402	10.87	0.626*
		11.8	0.986*	1.344*	1.936	3.166	4.244	7.572	9.402	10.77	0.826*
		11.9	0.886*	1.244*	2.036	3.366	4.244	7.472	9.402	10.77	0.826*
		12	0.886*	1.344*	1.936	3.166	4.244	7.472	9.302	10.67	0.726*
		12.1	0.886*	1.244*	1.936	3.266	4.144	7.472	9.502	10.77	0.726*
		12.2	0.886*	1.344*	1.936	3.166	4.244	7.572	9.502	10.77	0.626*
		12.3	0.786*	1.244*	1.936	3.366	4.344	7.672	9.402	10.67	0.626*
		12.4	0.886*	1.344*	2.036	3.266	4.344	7.672	9.402	10.77	0.726*
		12.5	0.886*	1.344*	1.936	3.266	4.344	7.572	9.502	10.67	0.726*
		12.6	0.786*	1.344*	1.936	3.166	4.344	7.672	9.502	10.77	0.626*
		12.7	0.786*	1.344*	1.836	3.066	4.444	7.772	9.402	10.77	0.726*
		12.8	0.986*	1.444*	2.036	3.266	4.344	7.572	9.502	10.67	0.726*
		12.9	0.786*	1.344*	2.036	3.266	4.444	7.672	9.402	10.77	0.526*
		13	0.786*	1.344*	1.936	3.266	4.344	7.672	9.302	10.67	0.626*
		13.1	0.886*	1.344*	2.036	3.266	4.544	7.772	9.402	10.67	0.726*
		13.2	0.886*	1.444*	1.936	3.266	4.444	7.672	9.402	10.67	0.726*
		13.3	0.986*	1.444*	2.036	3.366	4.444	7.672	9.502	10.77	0.726*
		13.4	0.886*	1.344*	1.936	3.366	4.444	7.672	9.502	10.77	0.826*
		13.5	0.786*	1.344*	2.036	3.366	4.544	7.672	9.502	10.77	0.726*
		13.6	0.886*	1.444*	1.936	3.266	4.544	7.772	9.402	10.77	0.626*
		13.7	0.986*	1.544*	1.936	3.266	4.444	7.672	9.502	10.67	0.626*
		13.8	0.986*	1.444*	1.836	3.366	4.444	7.672	9.502	10.67	0.726*
		13.9	0.786*	1.444*	1.936	3.366	4.544	7.772	9.402	10.67	0.726*
		14	0.886*	1.444*	1.936	3.266	4.544	7.772	9.502	10.77	0.626*
		14.1	0.886*	1.444*	1.936	3.366	4.544	7.772	9.402	10.57	0.626*
		14.2	0.886*	1.544*	1.936	3.266	4.544	7.772	9.402	10.57	0.726*
		14.3	0.786*	1.444*	1.936	3.266	4.544	7.872	9.402	10.67	0.726*
		14.4	0.886*	1.444*	1.836	3.366	4.644	7.772	9.502	10.67	0.626*
		14.5	0.886*	1.444*	1.936	3.366	4.544	7.772	9.502	10.67	0.726*
		14.6	0.886*	1.544*	2.036	3.466	4.544	7.872	9.302	10.57	0.726*
		14.7	0.886*	1.544*	1.936	3.366	4.544	7.772	9.502	10.67	0.726*
		14.8	0.986*	1.544*	2.036	3.366	4.544	7.772	9.502	10.67	0.826*
		14.9	0.886*	1.444*	2.036	3.366	4.644	7.772	9.502	10.67	0.726*
		15	0.886*	1.544*	2.036	3.466	4.644	7.772	9.502	10.67	0.726*
		15.1	0.886*	1.544*	1.836	3.366	4.744	7.872	9.602	10.77	0.726*
		15.2	0.986*	1.544*	1.936	3.366	4.844	7.972	9.502	10.67	0.826*
		15.3	0.986*	1.544*	1.936	3.466	4.744	7.972	9.502	10.67	0.726*
		15.4	0.786*	1.444*	2.036	3.366	4.744	8.072	9.502	10.57	0.626*
		15.5	0.786*	1.444*	2.036	3.366	4.744	7.972	9.502	10.67	0.626*
		15.6	0.886*	1.444*	2.036	3.466	4.744	7.872	9.502	10.67	0.626*
		15.7	0.886*	1.544*	1.836	3.366	4.844	7.872	9.502	10.57	0.726*
		15.8	0.886*	1.544*	1.936	3.366	4.844	7.972	9.502	10.57	0.726*
		15.9	0.786*	1.444*	1.936	3.466	4.744	7.872	9.502	10.67	0.626*
		16	0.886*	1.444*	2.036	3.466	4.844	7.972	9.502	10.57	0.726*
		16.1	0.886*	1.544*	1.936	3.366	4.844	7.972	9.502	10.47	0.726*
		16.2	0.886*	1.544*	1.936	3.366	4.844	7.972	9.502	10.57	0.726*
		16.3	0.886*	1.544*	2.036	3.466	4.944	8.072	9.402	10.57	0.626*
		16.4	0.986*	1.544*	2.036	3.466	4.844	7.972	9.502	10.57	0.626*
		16.5	0.786*	1.444*	2.036	3.466	4.844	7.972	9.402	10.47	0.726*
		16.6	0.786*	1.444*	2.036	3.366	4.844	7.972	9.402	10.47	0.626*
		16.7	0.786*	1.444*	1.936	3.366	4.844	7.972	9.502	10.57	0.726*
		16.8	0.886*	1.444*	2.036	3.366	4.844	8.072	9.502	10.57	0.726*
		16.9	0.786*	1.444*	2.036	3.466	4.944	8.072	9.402	10.47	0.726*
		17	0.786*	1.444*	2.036	3.466	4.844	7.972	9.502	10.47	0.726*
		17.1	0.886*	1.444*	1.936	3.366	4.844	8.072	9.502	10.47	0.826*
		17.2	0.886*	1.444*	2.036	3.466	4.944	8.072	9.502	10.57	0.826*
		17.3	0.886*	1.444*	2.036	3.466	4.944	8.072	9.602	10.57	0.726*
		17.4	0.786*	1.444*	1.936	3.466	4.944	8.172	9.602	10.47	0.726*
		17.5	0.786*	1.444*	2.036	3.466	4.844	8.072	9.502	10.47	0.726*
		17.6	0.886*	1.444*	2.036	3.466	4.944	8.072	9.502	10.47	0.726*
		17.7	0.886*	1.544*	2.036	3.466	4.944	8.072	9.502	10.47	0.726*
		17.8	0.886*	1.544*	2.036	3.566	5.044	8.172	9.502	10.47	0.726*
		17.9	0.786*	1.444*	2.036	3.566	4.944	7.972	9.402	10.37	0.726*
		18	0.886*	1.444*	1.936	3.566	4.944	7.972	9.402	10.47	0.726*
		18.1	0.886*	1.544*	2.036	3.566	5.044	7.972	9.502	10.47	0.726*
		18.2	0.886*	1.544*	2.036	3.566	4.944	8.072	9.502	10.47	0.826*
		18.3	0.786*	1.444*	2.136	3.666	4.844	7.972	9.502	10.47	0.826*
		18.4	0.886*	1.444*	2.136	3.666	4.744	7.872	9.402	10.47	0.726*
		18.5	0.886*	1.444*	2.036	3.566	4.844	7.972	9.402	10.47	0.726*
		18.6	0.886*	1.444*	2.036	3.666	4.844	7.972	9.502	10.47	0.826*
		18.7	0.986*	1.444*	2.136	3.666	4.944	7.972	9.502	10.57	0.826*
		18.8	0.886*	1.444*	2.136	3.666	4.944	8.072	9.502	10.57	0.826*
		18.9	0.886*	1.444*	2.136	3.766	4.844	7.972	9.402	10.47	0.726*
		19	0.886*	1.444*	2.136	3.666	4.944	7.972	9.502	10.47	0.826*
		19.1	0.886*	1.344*	2.136	3.666	4.944	7.972	9.502	10.47	0.826*
		19.2	0.886*	1.444*	2.136	3.766	5.044	8.072	9.502	10.47	0.726*
		19.3	0.886*	1.444*	2.236	3.766	5.044	8.072	9.502	10.47	0.726*
		19.4	0.886*	1.444*	2.236	3.766	4.944	7.972	9.502	10.37	0.726*
		19.5	0.886*	1.444*	2.136	3.766	5.044	8.072	9.402	10.27	0.726*
		19.6	0.886*	1.444*	2.036	3.766	5.044	8.072	9.402	10.37	0.726*
		19.7	0.886*	1.444*	2.136	3.766	5.044	8.072	9.402	10.37	0.826*
		19.8	0.886*	1.444*	2.136	3.866	5.144	8.072	9.402	10.37	0.726*
		19.9	0.786*	1.444*	2.036	3.666	5.044	8.072	9.402	10.37	0.726*
		20	0.886*	1.444*	2.136	3.666	5.044	8.072	9.302	10.37	0.726*
		20.1	0.786*	1.444*	2.136	3.766	5.144	8.072	9.302	10.37	0.726*
		20.2	0.786*	1.444*	2.136	3.766	5.144	8.172	9.302	10.37	0.726*
		20.3	0.686*	1.444*	2.236	3.766	5.244	8.172	9.202	10.37	0.726*
		20.4	0.786*	1.444*	2.136	3.766	5.244	8.172	9.302	10.37	0.726*
		20.5	0.786*	1.444*	2.136	3.766	5.144	8.172	9.302	10.37	0.826*
		20.6	0.786*	1.444*	2.136	3.766	5.244	8.172	9.302	10.47	0.726*
		20.7	0.686*	1.444*	2.236	3.866	5.244	8.172	9.402	10.47	0.726*
		20.8	0.786*	1.344*	2.236	3.866	5.144	8.272	9.302	10.37	0.726*
		20.9	0.786*	1.344*	2.136	3.766	5.244	8.272	9.302	10.37	0.826*
		21	0.786*	1.444*	2.236	3.866	5.144	8.072	9.402	10.37	0.726*
		21.1	0.686*	1.344*	2.236	3.866	5.144	8.172	9.402	10.47	0.726*
		21.2	0.886*	1.444*	2.236	3.866	5.144	8.172	9.302	10.37	0.726*
		21.3	0.886*	1.444*	2.336	3.966	5.144	8.172	9.302	10.37	0.726*
		21.4	0.786*	1.444*	2.236	3.866	5.244	8.172	9.402	10.37	0.726*
		21.5	0.786*	1.444*	2.236	3.866	5.144	8.172	9.302	10.27	0.726*
		21.6	0.786*	1.444*	2.336	3.966	5.144	8.172	9.302	10.37	0.726*
		21.7	0.886*	1.444*	2.236	3.866	5.244	8.172	9.302	10.37	0.726*
		21.8	0.786*	1.444*	2.236	3.966	5.244	8.272	9.402	10.37	0.626*
		21.9	0.786*	1.444*	2.136	3.866	5.144	8.172	9.302	10.27	0.626*
		22	0.786*	1.444*	2.236	3.866	5.144	8.172	9.302	10.37	0.626*
		22.1	0.886*	1.544*	2.236	3.866	5.244	8.172	9.302	10.27	0.626*
		22.2	0.786*	1.444*	2.336	3.966	5.244	8.272	9.402	10.27	0.626*
		22.3	0.786*	1.444*	2.236	3.866	5.244	8.272	9.402	10.27	0.626*
		22.4	0.786*	1.444*	2.236	3.866	5.144	8.272	9.302	10.37	0.626*
		22.5	0.886*	1.444*	2.336	3.866	5.244	8.272	9.402	10.37	0.626*
		22.6	0.786*	1.344*	2.336	3.966	5.244	8.272	9.302	10.27	0.626*
		22.7	0.686*	1.344*	2.336	3.966	5.244	8.272	9.302	10.27	0.726*
		22.8	0.686*	1.444*	2.336	3.966	5.144	8.172	9.402	10.37	0.826*
		22.9	0.786*	1.444*	2.336	3.966	5.244	8.172	9.302	10.27	0.726*
		23	0.686*	1.344*	2.336	3.966	5.244	8.172	9.302	10.27	0.726*
		23.1	0.686*	1.444*	2.336	3.966	5.244	8.272	9.302	10.27	0.726*
		23.2	0.786*	1.444*	2.336	3.866	5.144	8.172	9.402	10.27	0.726*
		23.3	0.786*	1.444*	2.336	3.966	5.044	8.172	9.402	10.37	0.726*
		23.4	0.686*	1.344*	2.336	3.966	5.144	8.272	9.302	10.27	0.726*
		23.5	0.686*	1.344*	2.336	3.866	5.144	8.272	9.302	10.27	0.726*
		23.6	0.786*	1.444*	2.436	3.966	5.144	8.172	9.402	10.27	0.826*
		23.7	0.786*	1.444*	2.336	3.866	5.144	8.272	9.302	10.27	0.826*
		23.8	0.686*	1.344*	2.336	3.866	5.144	8.272	9.202	10.27	0.726*
		23.9	0.786*	1.344*	2.336	3.966	5.044	8.172	9.202	10.27	0.726*
		24	0.786*	1.444*	2.336	3.966	5.144	8.172	9.202	10.27	0.826*
		24.1	0.786*	1.444*	2.236	3.866	5.144	8.172	9.302	10.27	0.726*
		24.2	0.786*	1.444*	2.236	3.866	5.144	8.172	9.202	10.27	0.726*
		24.3	0.786*	1.344*	2.336	3.866	5.144	8.172	9.202	10.27	0.626*
		24.4	0.786*	1.444*	2.336	3.966	5.144	8.172	9.202	10.27	0.726*
		24.5	0.786*	1.444*	2.236	3.866	5.144	8.172	9.302	10.27	0.726*
		24.6	0.786*	1.444*	2.236	3.866	5.244	8.272	9.202	10.17	0.726*
		24.7	0.686*	1.344*	2.336	3.966	5.344	8.272	9.202	10.27	0.626*
		24.8	0.786*	1.444*	2.336	3.966	5.244	8.272	9.302	10.27	0.726*
		24.9	0.786*	1.444*	2.236	3.866	5.244	8.372	9.302	10.27	0.826*
		25	0.886*	1.344*	2.336	3.966	5.144	8.272	9.302	10.27	0.826*
		25.1	0.886*	1.344*	2.336	3.966	5.244	8.272	9.202	10.27	0.826*
		25.2	0.786*	1.444*	2.336	3.966	5.244	8.272	9.202	10.27	0.726*
		25.3	0.786*	1.444*	2.236	3.966	5.144	8.272	9.202	10.17	0.726*
		25.4	0.786*	1.444*	2.336	3.966	5.144	8.172	9.202	10.17	0.826*
		25.5	0.886*	1.444*	2.336	3.966	5.244	8.272	9.202	10.17	0.826*
		25.6	0.786*	1.344*	2.336	3.966	5.244	8.272	9.202	10.27	0.726*
		25.7	0.786*	1.444*	2.336	3.966	5.344	8.372	9.202	10.17	0.726*
		25.8	0.786*	1.444*	2.336	3.966	5.244	8.172	9.202	10.17	0.826*
		25.9	0.886*	1.444*	2.336	3.966	5.244	8.172	9.202	10.17	0.826*
		26	0.786*	1.344*	2.336	4.066	5.244	8.172	9.202	10.27	0.826*
		26.1	0.786*	1.344*	2.436	4.066	5.344	8.272	9.202	10.27	0.826*
		26.2	0.786*	1.344*	2.436	4.066	5.244	8.172	9.302	10.27	0.826*
		26.3	0.786*	1.344*	2.336	4.066	5.144	8.072	9.302	10.27	0.826*
		26.4	0.886*	1.344*	2.336	4.066	5.144	8.072	9.302	10.27	0.826*
		26.5	0.886*	1.344*	2.436	4.066	5.244	8.072	9.202	10.17	0.826*
		26.6	0.786*	1.344*	2.436	4.066	5.244	8.072	9.202	10.27	0.826*
		26.7	0.786*	1.444*	2.436	4.066	5.244	8.172	9.302	10.27	0.826*
		26.8	0.786*	1.444*	2.336	4.066	5.244	8.172	9.302	10.27	0.726*
		26.9	0.786*	1.444*	2.336	4.066	5.244	8.172	9.302	10.27	0.826*
		27	0.886*	1.344*	2.336	4.066	5.144	8.072	9.302	10.27	0.826*
		27.1	0.886*	1.544*	2.336	4.066	5.244	8.072	9.202	10.27	0.826*
		27.2	0.886*	1.544*	2.336	4.066	5.244	8.172	9.202	10.27	0.826*
		27.3	0.786*	1.444*	2.336	4.166	5.244	8.172	9.302	10.27	0.726*
		27.4	0.786*	1.344*	2.436	4.166	5.344	8.172	9.302	10.27	0.726*
		27.5	0.886*	1.344*	2.336	4.066	5.344	8.172	9.302	10.37	0.826*
		27.6	0.886*	1.544*	2.236	3.966	5.244	8.072	9.302	10.47	0.726*
		27.7	0.886*	1.544*	2.236	3.966	5.244	8.172	9.302	10.47	0.826*
		27.8	0.786*	1.444*	2.336	4.166	5.244	8.172	9.302	10.37	0.826*
		27.9	0.786*	1.444*	2.136	4.066	5.244	8.272	9.302	10.47	0.926*
		28	0.786*	1.444*	2.336	4.066	5.244	8.172	9.302	10.47	0.826*
		28.1	0.886*	1.444*	2.236	3.866	5.244	8.272	9.302	10.37	0.726*
		28.2	0.786*	1.444*	2.336	3.966	5.244	8.272	9.302	10.47	0.826*
		28.3	0.786*	1.444*	2.336	4.066	5.244	8.172	9.402	10.37	0.726*
		28.4	0.786*	1.344*	2.336	4.066	5.244	8.272	9.402	10.37	0.826*
		28.5	0.786*	1.544*	2.336	4.066	5.244	8.272	9.202	10.27	0.726*
		28.6	0.786*	1.444*	2.236	3.966	5.344	8.272	9.202	10.27	0.726*
		28.7	0.786*	1.444*	2.136	3.866	5.144	8.272	9.302	10.17	0.826*
		28.8	0.886*	1.544*	2.236	3.966	5.144	8.172	9.202	10.17	0.726*
		28.9	0.786*	1.344*	2.336	3.866	5.244	8.172	9.202	10.17	0.826*
		29	0.686*	1.444*	2.136	3.866	5.244	8.172	9.302	10.07	0.726*
		29.1	0.886*	1.544*	2.236	3.866	5.144	8.172	9.302	10.17	0.726*
		29.2	0.786*	1.444*	2.336	3.766	5.144	8.072	9.302	10.07	0.826*
		29.3	0.886*	1.544*	2.336	3.966	5.344	8.172	9.302	10.17	0.626*
		29.4	0.886*	1.444*	1.936	3.566	5.244	8.172	9.202	9.87	0.626*
		29.5	0.686*	1.444*	1.436	3.666	4.844	7.972	8.402	9.57	0.226*
		29.6	0.586*	1.344*	1.636	3.666	5.044	7.872	8.402	9.47	-0.174*
		29.7	-0.014*	1.044*	0.336	2.566	4.144	6.772	6.902	8.67	-0.874*
		29.8	-0.114*	0.544*	2.536	4.366	4.844	7.572	8.802	9.17	0.726*
		29.9	-2.314*	-2.656*	2.836	4.166	2.844	5.172	4.102	-3.63	-2.474*
		30	-5.214*	-5.156*	-0.864	0.666	-2.756	-2.828	-11.798	-20.63	-9.474*
		30.1	-3.114*	-1.256*	-0.564	4.466	2.244	5.172	1.702	20.97	-7.074*
		30.2	-0.614*	0.844*	0.736	5.766	7.544	14.072	18.002	32.57	-3.774*
		30.3	0.486*	1.544*	2.336	6.466	8.744	14.872	19.202	30.77	-1.374*
		30.4	0.486*	1.644*	3.336	6.766	8.944	14.072	18.302	27.37	-0.474*
		30.5	0.886*	1.644*	2.936	6.266	8.644	13.072	16.502	24.27	0.426*
		30.6	0.786*	1.644*	3.136	6.166	7.744	12.172	15.602	21.77	0.526*
		30.7	0.786*	1.444*	2.736	5.166	7.644	11.672	14.402	19.67	0.726*
		30.8	0.986*	1.544*	2.536	4.866	7.144	10.772	13.402	17.57	0.626*
		30.9	0.786*	1.844*	2.536	4.566	6.844	10.072	12.002	15.87	0.426*
		31	0.386*	1.344*	2.636	4.366	6.244	9.472	11.402	14.97	0.626*
		31.1	0.586*	1.344*	2.436	4.366	6.144	9.272	10.702	14.07	0.526*
		31.2	0.686*	1.444*	2.336	4.166	5.944	8.872	10.602	13.07	0.426*
		31.3	0.586*	1.444*	2.336	4.066	6.044	8.772	10.202	12.57	0.526*
		31.4	0.686*	1.444*	2.236	3.866	5.944	8.572	10.002	11.87	0.426*
		31.5	0.586*	1.544*	2.136	3.866	5.744	8.472	9.602	11.67	0.426*
		31.6	0.686*	1.444*	1.936	3.766	5.444	8.172	9.102	11.27	0.426*
		31.7	0.586*	1.444*	1.936	3.766	5.244	7.872	9.102	10.87	0.326*
		31.8	0.586*	1.444*	1.936	3.666	5.244	7.772	9.102	10.67	0.326*
		31.9	0.686*	1.444*	2.036	3.666	5.244	7.672	8.902	10.47	0.326*
		32	0.586*	1.244*	1.836	3.566	5.144	7.672	8.902	10.37	0.326*
		32.1	0.586*	1.244*	1.936	3.666	5.244	7.572	8.802	10.27	0.226*
		32.2	0.586*	1.344*	2.136	3.766	5.144	7.572	8.602	9.87	0.426*
		32.3	0.786*	1.444*	2.036	3.566	5.144	7.672	8.502	9.67	0.426*
		32.4	0.686*	1.244*	2.136	3.666	5.044	7.572	8.402	9.47	0.526*
		32.5	0.786*	1.244*	2.136	3.566	5.144	7.472	8.402	9.47	0.526*
		32.6	0.486*	1.144*	2.136	3.566	5.144	7.472	8.402	9.57	0.726*
		32.7	0.686*	1.244*	2.236	3.466	5.044	7.372	8.202	9.27	0.726*
		32.8	0.586*	1.244*	2.136	3.466	5.044	7.272	8.202	9.27	0.726*
		32.9	0.586*	1.244*	2.136	3.466	4.944	7.172	8.202	9.27	0.726*
		33	0.586*	1.244*	2.236	3.566	4.944	6.972	8.102	9.17	0.726*
		33.1	0.686*	1.244*	2.036	3.366	5.044	7.072	8.202	9.17	0.626*
		33.2	0.586*	1.144*	2.236	3.566	4.944	7.072	8.102	9.07	0.826*
		33.3	0.686*	1.344*	2.136	3.366	4.844	6.872	8.102	9.07	0.626*
		33.4	0.686*	1.244*	2.036	3.266	4.944	6.872	8.002	8.97	0.626*
		33.5	0.786*	1.244*	2.036	3.266	4.844	6.872	7.802	8.87	0.726*
		33.6	0.786*	1.144*	2.136	3.466	4.944	6.772	7.802	8.87	0.626*
		33.7	0.786*	1.244*	2.036	3.366	4.844	6.872	7.802	8.77	0.526*
		33.8	0.786*	1.244*	2.036	3.366	4.844	6.672	7.702	8.77	0.526*
		33.9	0.586*	1.144*	2.136	3.266	4.844	6.672	7.602	8.67	0.626*
		34	0.686*	1.144*	1.936	3.166	4.844	6.672	7.602	8.67	0.526*
		34.1	0.786*	1.144*	2.036	3.266	4.944	6.672	7.602	8.57	0.626*
		34.2	0.686*	1.044*	1.936	3.166	4.844	6.672	7.502	8.47	0.626*
		34.3	0.686*	1.244*	2.036	3.166	4.844	6.672	7.502	8.47	0.726*
		34.4	0.686*	1.244*	2.036	3.166	4.744	6.672	7.602	8.47	0.526*
		34.5	0.686*	1.244*	2.036	3.166	4.744	6.672	7.402	8.37	0.626*
		34.6	0.786*	1.244*	1.936	2.966	4.744	6.672	7.302	8.17	0.526*
		34.7	0.786*	1.244*	1.936	2.966	4.744	6.672	7.302	8.17	0.626*
		34.8	0.686*	1.144*	1.936	2.966	4.744	6.572	7.302	8.17	0.626*
		34.9	0.686*	1.144*	1.836	2.866	4.744	6.572	7.302	8.07	0.726*
		35	0.686*	1.244*	1.836	2.866	4.544	6.472	7.302	8.07	0.626*
		35.1	0.586*	1.144*	1.836	2.866	4.444	6.472	7.202	7.97	0.526*
		35.2	0.586*	1.244*	2.036	3.066	4.444	6.472	7.202	7.97	0.526*
		35.3	0.586*	1.244*	1.936	2.966	4.344	6.372	7.202	7.97	0.426*
		35.4	0.586*	1.244*	1.836	2.966	4.344	6.372	7.302	7.97	0.326*
		35.5	0.586*	1.044*	1.836	3.066	4.444	6.272	7.102	7.87	0.426*
		35.6	0.586*	1.144*	2.036	3.166	4.444	6.272	7.102	7.87	0.526*
		35.7	0.586*	1.144*	1.936	3.066	4.344	6.272	7.202	7.77	0.426*
		35.8	0.586*	1.144*	1.936	3.066	4.244	6.172	7.102	7.77	0.426*
		35.9	0.586*	1.044*	1.836	3.066	4.244	6.172	7.102	7.77	0.326*
		36	0.586*	1.044*	1.836	2.966	4.344	6.172	7.102	7.67	0.426*
		36.1	0.586*	1.044*	1.836	2.866	4.144	5.972	6.902	7.57	0.526*
		36.2	0.586*	1.044*	1.836	3.066	4.244	6.072	7.002	7.57	0.426*
		36.3	0.586*	1.044*	1.736	2.866	4.244	5.972	7.002	7.57	0.326*
		36.4	0.586*	1.044*	1.836	2.866	4.144	5.872	7.002	7.47	0.426*
		36.5	0.586*	1.044*	1.836	2.866	4.144	5.872	6.902	7.57	0.426*
		36.6	0.586*	0.944*	1.836	2.966	4.244	5.872	6.902	7.57	0.426*
		36.7	0.686*	1.144*	1.736	2.766	4.244	5.872	6.802	7.37	0.326*
		36.8	0.586*	1.044*	1.836	2.966	4.044	5.772	6.902	7.47	0.426*
		36.9	0.586*	1.044*	1.736	2.766	4.244	5.772	6.702	7.37	0.526*
		37	0.486*	0.944*	1.736	2.866	4.144	5.672	6.702	7.37	0.526*
		37.1	0.586*	1.144*	1.736	2.866	4.144	5.672	6.802	7.37	0.526*
		37.2	0.586*	1.044*	1.736	2.766	4.044	5.672	6.602	7.27	0.526*
		37.3	0.686*	1.144*	1.536	2.766	4.144	5.672	6.502	7.17	0.526*
		37.4	0.586*	1.044*	1.736	2.866	3.944	5.572	6.502	7.27	0.626*
		37.5	0.686*	1.044*	1.536	2.766	4.044	5.572	6.502	7.17	0.526*
		37.6	0.586*	1.144*	1.536	2.666	3.944	5.572	6.502	7.17	0.526*
		37.7	0.686*	1.044*	1.636	2.666	3.944	5.472	6.402	7.07	0.626*
		37.8	0.486*	0.944*	1.736	2.766	3.944	5.472	6.402	6.97	0.526*
		37.9	0.586*	0.944*	1.536	2.566	4.044	5.572	6.402	6.97	0.626*
		38	0.686*	1.044*	1.736	2.666	3.944	5.472	6.402	6.77	0.526*
		38.1	0.586*	1.044*	1.536	2.666	4.044	5.472	6.302	6.77	0.626*
		38.2	0.586*	1.044*	1.736	2.666	3.944	5.372	6.302	6.67	0.526*
		38.3	0.586*	1.044*	1.536	2.666	4.044	5.372	6.302	6.67	0.526*
		38.4	0.486*	0.944*	1.736	2.666	4.044	5.372	6.302	6.77	0.626*
		38.5	0.586*	1.044*	1.736	2.566	3.944	5.272	6.202	6.67	0.426*
		38.6	0.486*	0.944*	1.736	2.766	4.044	5.372	6.002	6.57	0.526*
		38.7	0.486*	1.044*	1.736	2.566	3.944	5.272	6.202	6.67	0.426*
		38.8	0.586*	0.944*	1.736	2.766	3.944	5.272	6.102	6.57	0.426*
		38.9	0.486*	1.044*	1.836	2.766	3.944	5.272	6.002	6.47	0.426*
		39	0.486*	0.844*	1.736	2.766	3.944	5.172	5.902	6.57	0.526*
		39.1	0.386*	0.944*	1.736	2.666	3.844	5.172	6.002	6.47	0.526*
		39.2	0.486*	0.844*	1.836	2.766	3.944	5.172	5.802	6.37	0.526*
		39.3	0.586*	0.944*	1.836	2.766	3.844	5.172	6.002	6.57	0.526*
		39.4	0.386*	0.744*	1.836	2.766	3.744	5.072	5.802	6.37	0.526*
		39.5	0.486*	0.844*	1.636	2.766	3.844	5.072	5.802	6.37	0.426*
		39.6	0.386*	0.944*	1.736	2.666	3.744	5.072	5.802	6.37	0.526*
		39.7	0.486*	0.844*	1.636	2.666	3.744	4.972	5.802	6.37	0.526*
		39.8	0.486*	0.844*	1.736	2.666	3.744	5.072	5.802	6.27	0.526*
		39.9	0.486*	0.844*	1.636	2.666	3.744	5.072	5.802	6.27	0.426*
		40	0.386*	0.744*	1.536	2.666	3.644	4.872	5.602	6.07	0.526*
		40.1	0.486*	0.944*	1.636	2.666	3.744	5.072	5.702	6.17	0.526*
		40.2	0.486*	0.944*	1.536	2.666	3.744	4.972	5.702	6.17	0.526*
		40.3	0.386*	0.844*	1.536	2.566	3.644	4.972	5.602	6.07	0.626*
		40.4	0.586*	0.944*	1.536	2.566	3.544	4.772	5.602	6.07	0.626*
		40.5	0.386*	0.844*	1.536	2.566	3.644	4.872	5.502	6.07	0.626*
		40.6	0.386*	0.944*	1.536	2.566	3.644	4.872	5.602	5.97	0.626*
		40.7	0.386*	0.844*	1.536	2.666	3.544	4.672	5.402	5.97	0.526*
		40.8	0.386*	0.844*	1.436	2.566	3.544	4.772	5.402	5.97	0.526*
		40.9	0.386*	0.844*	1.536	2.666	3.544	4.772	5.502	5.87	0.626*
		41	0.486*	0.944*	1.436	2.566	3.544	4.672	5.302	5.87	0.526*
		41.1	0.386*	0.844*	1.436	2.566	3.444	4.672	5.302	5.87	0.526*
		41.2	0.386*	0.944*	1.536	2.466	3.344	4.572	5.402	5.97	0.526*
		41.3	0.286*	0.744*	1.436	2.566	3.444	4.572	5.302	5.77	0.526*
		41.4	0.386*	0.844*	1.436	2.466	3.444	4.572	5.302	5.77	0.526*
		41.5	0.386*	0.944*	1.536	2.566	3.344	4.472	5.202	5.57	0.526*
		41.6	0.286*	0.744*	1.336	2.466	3.344	4.572	5.302	5.77	0.426*
		41.7	0.386*	0.944*	1.436	2.466	3.444	4.572	5.202	5.67	0.526*
		41.8	0.386*	0.944*	1.336	2.466	3.344	4.472	5.302	5.67	0.526*
		41.9	0.386*	0.844*	1.336	2.466	3.244	4.472	5.202	5.67	0.326*
		42	0.286*	0.844*	1.436	2.466	3.344	4.372	5.202	5.67	0.426*
		42.1	0.386*	0.944*	1.336	2.466	3.344	4.572	5.102	5.57	0.426*
		42.2	0.286*	0.844*	1.336	2.366	3.344	4.372	5.202	5.67	0.326*
		42.3	0.286*	0.844*	1.336	2.366	3.344	4.472	5.202	5.57	0.426*
		42.4	0.386*	0.844*	1.336	2.366	3.244	4.372	5.102	5.57	0.526*
		42.5	0.386*	0.844*	1.336	2.366	3.344	4.372	5.102	5.47	0.426*
		42.6	0.286*	0.944*	1.236	2.366	3.344	4.372	5.102	5.57	0.426*
		42.7	0.386*	0.844*	1.136	2.166	3.244	4.372	5.102	5.57	0.426*
		42.8	0.386*	0.944*	1.236	2.366	3.244	4.272	4.902	5.37	0.526*
		42.9	0.386*	0.944*	1.236	2.366	3.344	4.372	5.102	5.47	0.426*
		43	0.386*	0.944*	1.336	2.266	3.244	4.272	5.002	5.47	0.426*
		43.1	0.386*	0.944*	1.136	2.166	3.244	4.272	4.802	5.27	0.426*
		43.2	0.286*	0.844*	1.236	2.366	3.144	4.272	4.802	5.37	0.526*
		43.3	0.486*	0.944*	1.236	2.266	3.244	4.272	4.702	5.17	0.426*
		43.4	0.486*	0.944*	1.136	2.166	3.244	4.372	4.802	5.37	0.426*
		43.5	0.286*	0.844*	1.136	2.266	3.044	4.172	4.702	5.17	0.426*
		43.6	0.286*	0.844*	1.236	2.266	3.144	4.272	4.602	5.07	0.326*
		43.7	0.486*	0.944*	1.236	2.266	3.044	4.172	4.602	5.17	0.426*
		43.8	0.386*	0.844*	1.236	2.266	3.144	4.272	4.702	5.17	0.426*
		43.9	0.386*	0.844*	1.136	2.166	3.244	4.172	4.602	5.07	0.326*
		44	0.386*	0.844*	1.236	2.066	3.144	4.172	4.502	4.97	0.426*
		44.1	0.386*	0.844*	1.236	2.266	3.044	4.072	4.602	5.07	0.426*
		44.2	0.386*	0.844*	1.136	2.166	3.144	4.272	4.502	5.07	0.326*
		44.3	0.486*	0.844*	1.236	2.066	3.044	4.172	4.502	4.97	0.426*
		44.4	0.286*	0.744*	1.236	2.166	3.044	4.072	4.502	4.97	0.426*
		44.5	0.386*	0.844*	1.136	2.166	3.044	4.072	4.502	4.97	0.426*
		44.6	0.386*	0.844*	1.136	2.066	2.944	4.072	4.502	4.97	0.426*
		44.7	0.386*	0.744*	1.236	2.066	3.044	4.072	4.302	4.77	0.426*
		44.8	0.386*	0.644*	1.236	2.166	3.044	4.072	4.502	4.87	0.426*
		44.9	0.486*	0.844*	1.236	2.066	2.944	4.072	4.502	4.87	0.426*
		45	0.486*	0.844*	1.136	2.066	2.944	3.972	4.302	4.77	0.426*
		45.1	0.386*	0.744*	1.236	2.066	2.944	3.972	4.302	4.67	0.426*
		45.2	0.386*	0.744*	1.236	2.066	2.844	3.872	4.302	4.67	0.426*
		45.3	0.486*	0.844*	1.236	2.066	2.844	3.872	4.402	4.77	0.426*
		45.4	0.386*	0.744*	1.036	1.966	2.944	3.972	4.302	4.77	0.426*
		45.5	0.386*	0.744*	1.236	2.066	2.944	3.872	4.302	4.57	0.326*
		45.6	0.386*	0.844*	1.236	2.066	2.844	3.872	4.302	4.67	0.426*
		45.7	0.286*	0.644*	1.236	2.066	2.944	3.972	4.202	4.67	0.526*
		45.8	0.386*	0.744*	1.136	2.166	2.944	3.872	4.202	4.57	0.426*
		45.9	0.386*	0.844*	1.036	2.066	2.844	3.872	4.102	4.47	0.426*
		46	0.386*	0.844*	1.136	1.966	2.844	3.872	4.202	4.57	0.426*
		46.1	0.286*	0.744*	1.236	2.166	2.744	3.672	4.102	4.47	0.426*
		46.2	0.386*	0.744*	1.136	2.066	2.744	3.772	4.002	4.47	0.326*
		46.3	0.386*	0.744*	1.036	1.966	2.844	3.772	4.102	4.37	0.426*
		46.4	0.386*	0.844*	1.136	1.966	2.844	3.772	4.202	4.57	0.326*
		46.5	0.386*	0.844*	1.036	1.966	2.744	3.672	4.002	4.47	0.426*
		46.6	0.386*	0.744*	1.136	2.066	2.744	3.672	4.002	4.47	0.426*
		46.7	0.386*	0.744*	1.036	1.966	2.744	3.672	3.902	4.47	0.326*
		46.8	0.286*	0.844*	1.136	1.966	2.744	3.672	4.002	4.47	0.326*
		46.9	0.486*	0.944*	1.136	2.066	2.644	3.572	3.902	4.27	0.326*
		47	0.486*	0.944*	1.036	1.866	2.744	3.672	4.002	4.37	0.426*
		47.1	0.386*	0.744*	1.036	1.966	2.744	3.672	3.902	4.47	0.326*
		47.2	0.386*	0.844*	1.136	2.066	2.744	3.572	4.002	4.37	0.326*
		47.3	0.586*	0.944*	1.036	1.966	2.644	3.572	3.902	4.27	0.426*
		47.4	0.486*	0.944*	1.036	1.866	2.644	3.572	3.802	4.17	0.326*
		47.5	0.386*	0.844*	1.036	1.866	2.644	3.472	3.902	4.27	0.326*
		47.6	0.386*	0.944*	0.936	1.866	2.644	3.572	4.002	4.37	0.326*
		47.7	0.486*	0.944*	1.036	1.966	2.644	3.572	3.902	4.17	0.326*
		47.8	0.486*	0.944*	1.036	1.966	2.744	3.472	3.802	4.17	0.326*
		47.9	0.486*	0.844*	1.036	1.766	2.644	3.572	3.802	4.17	0.226*
		48	0.586*	0.944*	0.936	1.866	2.644	3.572	4.002	4.17	0.326*
		48.1	0.486*	0.944*	1.036	1.966	2.644	3.572	3.802	4.17	0.326*
		48.2	0.486*	0.944*	1.036	1.966	2.544	3.572	3.802	4.17	0.326*
		48.3	0.486*	0.844*	0.936	1.766	2.544	3.472	3.702	4.07	0.226*
		48.4	0.586*	0.844*	1.036	1.766	2.544	3.472	3.802	4.07	0.226*
		48.5	0.486*	0.944*	0.936	1.866	2.544	3.572	3.802	4.07	0.226*
		48.6	0.486*	0.944*	0.936	1.866	2.544	3.472	3.802	3.97	0.326*
		48.7	0.486*	0.944*	0.936	1.766	2.444	3.372	3.702	4.07	0.326*
		48.8	0.586*	0.844*	1.036	1.866	2.644	3.472	3.702	4.07	0.326*
		48.9	0.586*	0.844*	1.036	1.766	2.644	3.472	3.702	3.97	0.326*
		49	0.486*	0.844*	0.836	1.666	2.444	3.372	3.702	3.97	0.326*
		49.1	0.486*	0.844*	0.836	1.766	2.544	3.372	3.702	3.97	0.226*
		49.2	0.586*	0.844*	0.836	1.766	2.544	3.372	3.602	3.87	0.226*
		49.3	0.486*	0.744*	0.936	1.766	2.444	3.272	3.702	3.97	0.426*
		49.4	0.486*	0.844*	0.836	1.566	2.344	3.172	3.602	3.97	0.326*
		49.5	0.486*	0.844*	0.836	1.666	2.544	3.372	3.602	3.87	0.326*
		49.6	0.486*	0.744*	0.936	1.766	2.544	3.372	3.702	3.87	0.326*
		49.7	0.386*	0.644*	0.836	1.666	2.344	3.172	3.602	3.87	0.326*
		49.8	0.386*	0.644*	0.836	1.566	2.444	3.172	3.602	3.87	0.226*
		49.9	0.486*	0.844*	0.836	1.566	2.444	3.172	3.602	3.87	0.326*
		50	0.486*	0.844*	0.836	1.566	2.444	3.172	3.402	3.77	0.426*
		50.1	0.586*	0.744*	0.736	1.666	2.444	3.272	3.602	3.77	0.426*
		50.2	0.486*	0.644*	0.736	1.666	2.444	3.272	3.602	3.77	0.426*
		50.3	0.386*	0.744*	0.836	1.566	2.444	3.072	3.502	3.87	0.326*
		50.4	0.386*	0.644*	0.836	1.566	2.444	3.072	3.402	3.77	0.426*
		50.5	0.386*	0.644*	0.836	1.566	2.344	3.172	3.502	3.67	0.426*
		50.6	0.486*	0.644*	0.736	1.666	2.344	3.072	3.602	3.77	0.426*
		50.7	0.486*	0.744*	0.636	1.466	2.344	2.972	3.502	3.77	0.426*
		50.8	0.486*	0.744*	0.736	1.466	2.344	2.972	3.502	3.67	0.426*
		50.9	0.486*	0.744*	0.736	1.466	2.344	3.072	3.602	3.77	0.426*
		51	0.486*	0.544*	0.836	1.566	2.344	3.072	3.502	3.67	0.426*
		51.1	0.386*	0.644*	0.836	1.466	2.244	2.972	3.402	3.67	0.326*
		51.2	0.386*	0.644*	0.736	1.466	2.344	2.972	3.402	3.57	0.426*
		51.3	0.386*	0.644*	0.736	1.466	2.244	2.972	3.502	3.77	0.326*
		51.4	0.386*	0.644*	0.736	1.466	2.244	2.972	3.502	3.67	0.426*
		51.5	0.386*	0.644*	0.736	1.466	2.244	2.972	3.402	3.57	0.426*
		51.6	0.486*	0.644*	0.736	1.366	2.244	2.972	3.402	3.57	0.526*
		51.7	0.386*	0.644*	0.836	1.566	2.244	2.872	3.402	3.57	0.526*
		51.8	0.386*	0.644*	0.736	1.466	2.244	2.872	3.402	3.47	0.526*
		51.9	0.386*	0.644*	0.736	1.466	2.244	2.972	3.402	3.57	0.526*
		52	0.286*	0.644*	0.736	1.466	2.244	2.972	3.502	3.67	0.426*
		52.1	0.286*	0.644*	0.736	1.366	2.244	2.872	3.402	3.47	0.526*
		52.2	0.386*	0.544*	0.736	1.466	2.144	2.972	3.302	3.47	0.526*
		52.3	0.286*	0.544*	0.736	1.466	2.044	2.872	3.302	3.47	0.526*
		52.4	0.286*	0.644*	0.736	1.466	2.144	2.872	3.302	3.37	0.426*
		52.5	0.386*	0.744*	0.736	1.466	2.144	2.872	3.402	3.47	0.326*
		52.6	0.286*	0.644*	0.736	1.466	2.144	2.872	3.202	3.37	0.426*
		52.7	0.286*	0.644*	0.636	1.366	2.144	2.872	3.202	3.37	0.526*
		52.8	0.386*	0.644*	0.736	1.466	2.144	2.972	3.202	3.27	0.526*
		52.9	0.386*	0.544*	0.736	1.466	2.044	2.872	3.202	3.27	0.526*
		53	0.286*	0.644*	0.736	1.466	2.144	2.772	3.202	3.37	0.626*
		53.1	0.286*	0.644*	0.736	1.466	2.044	2.772	3.202	3.37	0.526*
		53.2	0.186*	0.544*	0.736	1.466	2.144	2.872	3.202	3.27	0.426*
		53.3	0.186*	0.544*	0.736	1.566	2.144	2.972	3.202	3.27	0.426*
		53.4	0.186*	0.544*	0.636	1.366	2.044	2.772	3.102	3.17	0.426*
		53.5	0.186*	0.444*	0.636	1.366	2.044	2.772	3.102	3.27	0.426*
		53.6	0.386*	0.644*	0.736	1.466	1.944	2.772	3.102	3.27	0.426*
		53.7	0.386*	0.644*	0.736	1.466	2.044	2.772	3.102	3.17	0.526*
		53.8	0.386*	0.644*	0.736	1.466	2.044	2.672	3.102	3.27	0.426*
		53.9	0.186*	0.544*	0.636	1.366	2.044	2.772	3.002	3.17	0.426*
		54	0.186*	0.544*	0.636	1.366	2.044	2.772	3.102	3.27	0.426*
		54.1	0.186*	0.644*	0.636	1.366	2.044	2.772	3.002	3.17	0.426*
		54.2	0.186*	0.644*	0.636	1.366	1.944	2.672	3.002	3.17	0.426*
		54.3	0.286*	0.544*	0.736	1.466	2.044	2.672	3.002	3.17	0.426*
		54.4	0.286*	0.544*	0.636	1.366	2.044	2.672	3.002	3.17	0.426*
		54.5	0.286*	0.544*	0.636	1.366	2.044	2.672	3.002	3.07	0.426*
		54.6	0.286*	0.544*	0.636	1.366	2.044	2.672	2.802	2.97	0.426*
		54.7	0.186*	0.544*	0.636	1.366	1.944	2.572	2.902	3.07	0.526*
		54.8	0.186*	0.644*	0.536	1.366	1.944	2.672	3.002	3.07	0.526*
		54.9	0.186*	0.644*	0.636	1.366	1.944	2.672	3.002	3.07	0.426*
		55	0.186*	0.644*	0.636	1.366	1.944	2.672	3.002	3.07	0.326*
		55.1	0.086*	0.444*	0.636	1.266	1.944	2.472	2.902	3.07	0.326*
		55.2	0.086*	0.444*	0.636	1.366	1.944	2.572	2.902	3.07	0.426*
		55.3	0.186*	0.644*	0.636	1.366	1.844	2.572	2.902	2.97	0.526*
		55.4	0.186*	0.644*	0.636	1.266	1.844	2.572	2.902	2.97	0.426*
		55.5	0.186*	0.644*	0.636	1.266	1.844	2.472	2.802	2.97	0.426*
		55.6	0.186*	0.644*	0.536	1.266	1.844	2.472	2.802	2.87	0.426*
		55.7	0.186*	0.544*	0.536	1.266	1.844	2.372	2.802	2.87	0.326*
		55.8	0.086*	0.444*	0.636	1.266	1.844	2.372	2.902	2.97	0.326*
		55.9	0.086*	0.544*	0.636	1.266	1.844	2.572	2.802	3.07	0.426*
		56	0.086*	0.544*	0.736	1.266	1.844	2.472	2.802	2.97	0.426*
		56.1	0.086*	0.544*	0.636	1.266	1.844	2.472	2.802	2.97	0.426*
		56.2	0.186*	0.544*	0.536	1.266	1.844	2.472	2.802	2.87	0.426*
		56.3	0.286*	0.644*	0.536	1.266	1.744	2.372	2.702	2.87	0.426*
		56.4	0.286*	0.644*	0.536	1.166	1.844	2.372	2.702	2.87	0.426*
		56.5	0.186*	0.544*	0.536	1.166	1.744	2.372	2.802	2.97	0.426*
		56.6	0.086*	0.544*	0.636	1.266	1.744	2.372	2.702	2.77	0.426*
		56.7	0.086*	0.544*	0.736	1.366	1.744	2.372	2.602	2.77	0.326*
		56.8	0.086*	0.544*	0.636	1.266	1.744	2.372	2.602	2.77	0.426*
		56.9	0.186*	0.544*	0.636	1.266	1.844	2.472	2.602	2.67	0.326*
		57	0.186*	0.544*	0.636	1.166	1.744	2.372	2.702	2.77	0.326*
		57.1	0.186*	0.644*	0.536	1.166	1.644	2.272	2.702	2.87	0.326*
		57.2	0.186*	0.644*	0.636	1.166	1.744	2.272	2.702	2.87	0.326*
		57.3	0.186*	0.644*	0.636	1.166	1.744	2.272	2.602	2.77	0.326*
		57.4	0.086*	0.444*	0.636	1.266	1.744	2.372	2.602	2.67	0.326*
		57.5	0.086*	0.544*	0.636	1.266	1.744	2.372	2.502	2.67	0.426*
		57.6	0.086*	0.544*	0.636	1.266	1.744	2.372	2.502	2.67	0.326*
		57.7	0.186*	0.544*	0.636	1.166	1.644	2.272	2.502	2.67	0.326*
		57.8	0.186*	0.644*	0.636	1.166	1.544	2.172	2.502	2.67	0.426*
		57.9	0.186*	0.644*	0.636	1.166	1.744	2.272	2.402	2.57	0.426*
		58	0.186*	0.644*	0.636	1.166	1.744	2.272	2.402	2.57	0.426*
		58.1	0.186*	0.644*	0.636	1.166	1.744	2.172	2.402	2.57	0.426*
		58.2	0.086*	0.444*	0.736	1.266	1.744	2.272	2.402	2.57	0.426*
		58.3	0.086*	0.444*	0.736	1.266	1.644	2.272	2.502	2.57	0.326*
		58.4	0.186*	0.444*	0.736	1.166	1.644	2.272	2.402	2.57	0.326*
		58.5	0.086*	0.544*	0.736	1.166	1.544	2.172	2.402	2.57	0.426*
		58.6	0.086*	0.544*	0.536	1.066	1.544	2.172	2.402	2.57	0.426*
		58.7	0.086*	0.544*	0.536	1.066	1.644	2.072	2.402	2.47	0.426*
		58.8	0.186*	0.644*	0.536	1.166	1.644	2.072	2.302	2.47	0.426*
		58.9	0.186*	0.644*	0.636	1.266	1.644	2.172	2.302	2.47	0.426*
		59	0.086*	0.444*	0.736	1.266	1.544	2.172	2.402	2.47	0.426*
		59.1	0.086*	0.444*	0.736	1.266	1.644	2.172	2.402	2.47	0.326*
		59.2	0.186*	0.444*	0.736	1.166	1.644	2.172	2.302	2.47	0.226*
		59.3	0.086*	0.444*	0.736	1.166	1.644	2.172	2.202	2.47	0.226*
		59.4	0.086*	0.544*	0.636	1.066	1.644	2.072	2.302	2.47	0.326*
		59.5	0.086*	0.544*	0.636	1.166	1.644	2.072	2.302	2.47	0.426*
		59.6	0.086*	0.544*	0.536	1.166	1.644	1.972	2.202	2.37	0.426*
		59.7	0.086*	0.444*	0.636	1.166	1.544	2.072	2.202	2.37	0.426*
		59.8	0.086*	0.444*	0.636	1.066	1.544	2.072	2.302	2.47	0.326*
		59.9	0.186*	0.444*	0.636	1.066	1.544	2.072	2.202	2.37	0.326*
		60	0.186*	0.444*	0.636	1.066	1.644	2.172	2.302	2.37	0.426*
		60.1	0.086*	0.444*	0.736	1.266	1.744	2.072	2.202	2.37	0.426*
		60.2	0.086*	0.444*	0.736	1.266	1.744	2.072	2.202	2.37	0.426*
		60.3	0.086*	0.544*	0.636	1.166	1.644	2.072	2.202	2.37	0.426*
		60.4	-0.014*	0.444*	0.536	1.166	1.644	2.072	2.202	2.37	0.326*
		60.5	0.186*	0.544*	0.636	1.166	1.544	2.072	2.102	2.37	0.326*
		60.6	0.186*	0.544*	0.636	1.066	1.544	1.972	2.102	2.27	0.326*
		60.7	0.186*	0.544*	0.636	1.066	1.544	1.972	2.202	2.27	0.426*
		60.8	0.186*	0.544*	0.636	1.066	1.644	1.972	2.202	2.27	0.426*
		60.9	0.186*	0.644*	0.636	1.166	1.644	1.972	2.202	2.37	0.426*
		61	0.086*	0.544*	0.536	1.066	1.544	1.872	2.202	2.37	0.426*
		61.1	0.086*	0.544*	0.536	1.066	1.544	1.872	2.102	2.37	0.426*
		61.2	-0.014*	0.444*	0.536	1.066	1.544	1.872	2.102	2.27	0.426*
		61.3	0.186*	0.544*	0.436	0.966	1.544	1.972	2.202	2.27	0.426*
		61.4	0.186*	0.544*	0.636	1.066	1.644	1.972	2.202	2.27	0.426*
		61.5	0.186*	0.544*	0.636	1.166	1.644	1.872	2.202	2.27	0.426*
		61.6	0.186*	0.544*	0.636	1.166	1.644	1.872	2.202	2.27	0.526*
		61.7	0.186*	0.544*	0.636	1.166	1.644	1.872	2.102	2.27	0.526*
		61.8	0.186*	0.544*	0.636	1.066	1.444	1.772	2.202	2.17	0.426*
		61.9	0.086*	0.344*	0.536	0.966	1.444	1.872	2.202	2.17	0.526*
		62	0.086*	0.444*	0.536	0.966	1.444	1.772	2.102	2.17	0.526*
		62.1	0.186*	0.544*	0.436	1.066	1.544	1.772	2.202	2.27	0.526*
		62.2	0.186*	0.544*	0.636	1.166	1.544	1.772	2.102	2.27	0.426*
		62.3	0.186*	0.544*	0.636	1.166	1.544	1.772	2.102	2.27	0.326*
		62.4	0.086*	0.444*	0.636	1.166	1.544	1.772	2.102	2.17	0.426*
		62.5	0.086*	0.444*	0.636	1.166	1.444	1.672	2.102	2.17	0.426*
		62.6	0.086*	0.444*	0.636	1.166	1.344	1.672	2.202	2.17	0.426*
		62.7	0.086*	0.444*	0.536	1.066	1.344	1.672	2.202	2.17	0.526*
		62.8	0.186*	0.544*	0.436	1.066	1.544	1.772	2.102	2.17	0.526*
		62.9	0.186*	0.544*	0.436	1.066	1.544	1.772	2.002	2.17	0.526*
		63	0.086*	0.544*	0.436	1.066	1.544	1.772	2.002	2.17	0.426*
		63.1	0.086*	0.544*	0.536	1.066	1.544	1.772	2.002	2.07	0.426*
		63.2	0.086*	0.444*	0.436	0.966	1.544	1.672	2.002	2.07	0.526*
		63.3	0.186*	0.444*	0.436	0.966	1.444	1.772	2.102	2.07	0.526*
		63.4	0.186*	0.444*	0.436	0.966	1.344	1.672	2.102	2.17	0.426*
		63.5	0.186*	0.444*	0.536	1.066	1.344	1.672	2.002	2.07	0.426*
		63.6	0.186*	0.444*	0.436	1.066	1.344	1.672	2.002	2.07	0.526*
		63.7	0.186*	0.444*	0.436	1.066	1.444	1.672	2.002	2.07	0.526*
		63.8	0.186*	0.544*	0.436	1.066	1.444	1.572	2.002	2.07	0.426*
		63.9	0.186*	0.444*	0.536	1.066	1.444	1.572	2.002	2.07	0.426*
		64	0.086*	0.444*	0.536	1.066	1.244	1.572	2.002	2.07	0.326*
		64.1	0.086*	0.444*	0.436	0.966	1.344	1.672	2.002	2.07	0.426*
		64.2	0.086*	0.444*	0.436	0.966	1.344	1.672	2.002	2.07	0.426*
		64.3	0.186*	0.544*	0.436	0.966	1.344	1.672	2.002	2.07	0.426*
		64.4	0.186*	0.444*	0.436	0.966	1.344	1.572	2.002	1.97	0.426*
		64.5	0.186*	0.444*	0.336	0.966	1.344	1.572	2.002	1.97	0.426*
		64.6	0.286*	0.444*	0.436	0.966	1.444	1.572	2.002	1.97	0.426*
		64.7	0.186*	0.444*	0.436	0.966	1.244	1.572	2.002	1.97	0.426*
		64.8	0.186*	0.444*	0.336	0.866	1.244	1.572	1.902	1.87	0.426*
		64.9	0.086*	0.444*	0.336	0.866	1.244	1.572	1.902	1.97	0.326*
		65	0.086*	0.344*	0.436	0.966	1.244	1.572	1.902	1.87	0.426*
		65.1	0.186*	0.344*	0.436	1.066	1.244	1.472	1.902	1.87	0.426*
		65.2	0.186*	0.344*	0.436	0.966	1.244	1.472	1.802	1.87	0.426*
		65.3	0.186*	0.444*	0.436	0.966	1.244	1.472	1.802	1.87	0.426*
		65.4	0.186*	0.444*	0.436	0.966	1.244	1.572	1.802	1.87	0.426*
		65.5	0.186*	0.444*	0.436	0.966	1.344	1.672	1.802	1.77	0.426*
		65.6	0.186*	0.444*	0.436	0.966	1.344	1.672	1.802	1.87	0.426*
		65.7	0.186*	0.444*	0.436	0.966	1.344	1.672	1.902	1.97	0.426*
		65.8	0.186*	0.444*	0.436	0.966	1.244	1.572	2.002	1.97	0.426*
		65.9	0.286*	0.344*	0.336	0.966	1.244	1.572	1.902	1.87	0.426*
		66	0.086*	0.244*	0.336	0.966	1.244	1.672	1.802	1.77	0.426*
		66.1	0.086*	0.244*	0.336	0.866	1.144	1.572	1.802	1.77	0.426*
		66.2	0.086*	0.344*	0.336	0.866	1.244	1.572	1.802	1.77	0.426*
		66.3	0.186*	0.444*	0.336	0.866	1.244	1.572	1.802	1.77	0.426*
		66.4	0.186*	0.444*	0.536	0.966	1.144	1.472	1.802	1.87	0.426*
		66.5	0.186*	0.444*	0.536	0.966	1.044	1.472	1.702	1.87	0.526*
		66.6	0.186*	0.444*	0.536	0.966	1.144	1.572	1.802	1.87	0.426*
		66.7	0.286*	0.344*	0.536	0.966	1.144	1.472	1.702	1.77	0.326*
		66.8	0.286*	0.444*	0.436	0.966	1.144	1.472	1.802	1.77	0.326*
		66.9	0.186*	0.344*	0.336	0.966	1.244	1.472	1.802	1.77	0.326*
		67	0.286*	0.444*	0.336	0.866	1.244	1.572	1.802	1.77	0.326*
		67.1	0.186*	0.444*	0.336	0.866	1.144	1.572	1.802	1.67	0.526*
		67.2	0.186*	0.444*	0.336	0.866	1.144	1.572	1.802	1.67	0.526*
		67.3	0.186*	0.444*	0.336	0.866	1.144	1.572	1.702	1.77	0.526*
		67.4	0.186*	0.444*	0.436	0.866	1.044	1.472	1.702	1.77	0.526*
		67.5	0.186*	0.344*	0.436	0.866	1.044	1.472	1.602	1.67	0.426*
		67.6	0.186*	0.344*	0.436	0.866	1.044	1.372	1.702	1.67	0.426*
		67.7	0.186*	0.344*	0.536	0.966	1.044	1.472	1.702	1.57	0.426*
		67.8	0.186*	0.444*	0.536	0.966	1.044	1.572	1.702	1.67	0.326*
		67.9	0.186*	0.344*	0.336	0.866	1.144	1.572	1.702	1.77	0.326*
		68	0.186*	0.344*	0.336	0.866	1.144	1.572	1.702	1.77	0.426*
		68.1	0.186*	0.344*	0.336	0.866	1.144	1.572	1.702	1.77	0.426*
		68.2	0.286*	0.444*	0.336	0.866	1.144	1.572	1.702	1.77	0.426*
		68.3	0.286*	0.444*	0.336	0.866	1.144	1.572	1.702	1.77	0.426*
		68.4	0.286*	0.344*	0.336	0.866	0.944	1.372	1.602	1.67	0.526*
		68.5	0.186*	0.344*	0.536	0.966	0.944	1.372	1.602	1.57	0.526*
		68.6	0.186*	0.444*	0.536	0.966	0.944	1.372	1.602	1.67	0.326*
		68.7	0.186*	0.444*	0.536	0.966	1.144	1.472	1.602	1.67	0.326*
		68.8	0.186*	0.444*	0.336	0.866	1.144	1.472	1.602	1.67	0.326*
		68.9	0.186*	0.444*	0.336	0.866	1.144	1.472	1.602	1.67	0.326*
		69	0.186*	0.344*	0.336	0.866	1.044	1.372	1.702	1.67	0.426*
		69.1	0.186*	0.344*	0.336	0.866	0.944	1.372	1.702	1.67	0.426*
		69.2	0.386*	0.444*	0.336	0.866	0.944	1.372	1.602	1.67	0.426*
		69.3	0.286*	0.344*	0.436	0.866	1.044	1.372	1.502	1.57	0.426*
		69.4	0.286*	0.444*	0.436	0.866	1.044	1.372	1.602	1.67	0.426*
		69.5	0.186*	0.444*	0.436	0.866	1.044	1.372	1.602	1.67	0.426*
		69.6	0.186*	0.444*	0.336	0.866	1.144	1.472	1.602	1.67	0.326*
		69.7	0.186*	0.444*	0.336	0.866	1.144	1.472	1.502	1.67	0.326*
		69.8	0.186*	0.444*	0.336	0.866	1.044	1.472	1.502	1.57	0.326*
		69.9	0.186*	0.444*	0.336	0.866	0.944	1.372	1.502	1.57	0.426*
		70	0.186*	0.444*	0.336	0.866	1.044	1.372	1.602	1.67	0.426*
		70.1	0.086*	0.244*	0.336	0.866	1.044	1.372	1.602	1.67	0.426*
		70.2	0.186*	0.244*	0.436	0.866	1.044	1.272	1.602	1.57	0.426*
		70.3	0.086*	0.344*	0.436	0.866	1.044	1.272	1.502	1.57	0.326*
		70.4	0.086*	0.344*	0.336	0.666	1.044	1.272	1.502	1.57	0.326*
		70.5	0.086*	0.344*	0.336	0.666	1.044	1.272	1.502	1.57	0.226*
		70.6	0.086*	0.344*	0.336	0.666	0.944	1.172	1.502	1.57	0.226*
		70.7	0.186*	0.444*	0.436	0.766	0.944	1.372	1.502	1.57	0.226*
		70.8	0.186*	0.444*	0.336	0.866	1.044	1.272	1.502	1.57	0.426*
		70.9	0.186*	0.444*	0.336	0.866	1.044	1.272	1.402	1.47	0.426*
		71	0.286*	0.444*	0.436	0.866	1.044	1.272	1.302	1.37	0.426*
		71.1	0.286*	0.544*	0.436	0.866	1.044	1.272	1.402	1.37	0.326*
		71.2	0.286*	0.444*	0.436	0.866	1.044	1.272	1.402	1.37	0.326*
		71.3	0.186*	0.344*	0.436	0.766	1.044	1.272	1.402	1.47	0.326*
		71.4	0.186*	0.344*	0.336	0.666	1.144	1.272	1.502	1.57	0.326*
		71.5	0.086*	0.344*	0.336	0.666	1.044	1.172	1.502	1.57	0.326*
		71.6	0.086*	0.344*	0.336	0.666	0.944	1.272	1.402	1.57	0.426*
		71.7	0.086*	0.344*	0.336	0.666	0.944	1.272	1.302	1.47	0.426*
		71.8	0.086*	0.344*	0.436	0.766	1.044	1.272	1.302	1.47	0.426*
		71.9	0.086*	0.244*	0.436	0.866	1.044	1.272	1.402	1.37	0.326*
		72	0.086*	0.244*	0.436	0.866	1.044	1.172	1.402	1.37	0.226*
		72.1	0.186*	0.344*	0.336	0.766	1.044	1.172	1.402	1.47	0.226*
		72.2	0.186*	0.344*	0.336	0.666	1.044	1.172	1.402	1.47	0.326*
		72.3	0.286*	0.444*	0.336	0.666	0.844	1.072	1.402	1.47	0.326*
		72.4	0.186*	0.444*	0.336	0.666	0.844	1.072	1.302	1.47	0.326*
		72.5	0.086*	0.344*	0.336	0.666	0.944	1.072	1.302	1.37	0.426*
		72.6	0.086*	0.344*	0.436	0.666	0.944	1.172	1.402	1.47	0.426*
		72.7	0.086*	0.344*	0.436	0.766	1.044	1.172	1.402	1.47	0.426*
		72.8	0.086*	0.344*	0.536	0.866	1.044	1.172	1.402	1.47	0.326*
		72.9	0.086*	0.344*	0.536	0.866	1.044	1.172	1.402	1.47	0.326*
		73	0.186*	0.344*	0.536	0.866	1.044	1.172	1.302	1.37	0.326*
		73.1	0.186*	0.344*	0.336	0.666	1.044	1.272	1.202	1.27	0.326*
		73.2	0.186*	0.344*	0.336	0.666	0.944	1.172	1.302	1.37	0.226*
		73.3	0.186*	0.344*	0.336	0.666	0.844	1.072	1.302	1.37	0.226*
		73.4	0.186*	0.344*	0.336	0.666	0.844	1.072	1.302	1.37	0.226*
		73.5	-0.014*	0.244*	0.436	0.666	0.844	1.072	1.302	1.37	0.326*
		73.6	-0.014*	0.244*	0.436	0.666	1.044	1.172	1.302	1.37	0.326*
		73.7	-0.014*	0.244*	0.536	0.766	1.044	1.172	1.302	1.27	0.326*
		73.8	-0.014*	0.244*	0.536	0.866	1.044	1.272	1.302	1.27	0.326*
		73.9	-0.014*	0.244*	0.536	0.866	1.044	1.272	1.202	1.27	0.326*
		74	0.186*	0.344*	0.436	0.766	0.944	1.172	1.202	1.37	0.326*
		74.1	0.186*	0.444*	0.436	0.766	0.944	1.172	1.202	1.37	0.426*
		74.2	0.186*	0.444*	0.436	0.766	0.944	1.172	1.202	1.27	0.426*
		74.3	0.186*	0.344*	0.436	0.666	0.944	1.172	1.202	1.27	0.326*
		74.4	0.186*	0.344*	0.436	0.666	0.944	1.172	1.302	1.27	0.426*
		74.5	0.186*	0.344*	0.436	0.666	0.844	1.072	1.302	1.27	0.326*
		74.6	0.086*	0.244*	0.436	0.666	0.844	1.172	1.202	1.27	0.326*
		74.7	-0.014*	0.244*	0.436	0.766	0.844	1.172	1.202	1.27	0.326*
		74.8	-0.014*	0.244*	0.436	0.766	0.844	1.072	1.202	1.27	0.326*
		74.9	0.086*	0.244*	0.436	0.766	0.944	1.072	1.202	1.17	0.326*
		75	0.186*	0.344*	0.536	0.866	1.044	1.172	1.202	1.17	0.326*
		75.1	0.186*	0.344*	0.436	0.766	1.044	1.172	1.202	1.27	0.326*
		75.2	0.186*	0.344*	0.436	0.766	0.944	1.172	1.302	1.27	0.326*
		75.3	0.186*	0.444*	0.436	0.766	0.944	1.272	1.402	1.37	0.326*
		75.4	-0.014*	0.344*	0.436	0.766	0.844	1.172	1.402	1.37	0.326*
		75.5	-0.014*	0.344*	0.436	0.766	0.844	1.172	1.402	1.37	0.526*
		75.6	-0.014*	0.244*	0.436	0.866	0.844	1.072	1.302	1.27	0.426*
		75.7	-0.014*	0.244*	0.436	0.866	0.844	1.072	1.202	1.17	0.426*
		75.8	0.086*	0.244*	0.436	0.866	0.844	1.072	1.202	1.17	0.426*
		75.9	0.086*	0.244*	0.436	0.766	0.844	1.072	1.202	1.17	0.326*
		76	0.086*	0.244*	0.436	0.766	0.944	1.072	1.202	1.17	0.326*
		76.1	0.086*	0.244*	0.436	0.666	0.944	1.072	1.202	1.17	0.326*
		76.2	0.086*	0.344*	0.436	0.666	0.844	1.072	1.202	1.17	0.326*
		76.3	0.186*	0.444*	0.436	0.666	0.844	1.172	1.402	1.27	0.326*
		76.4	0.186*	0.444*	0.336	0.666	0.844	1.172	1.402	1.37	0.226*
		76.5	0.086*	0.344*	0.336	0.666	0.844	1.072	1.302	1.37	0.226*
		76.6	0.186*	0.344*	0.436	0.866	0.844	1.072	1.202	1.27	0.426*
		76.7	0.186*	0.344*	0.436	0.866	0.844	1.072	1.202	1.27	0.426*
		76.8	0.086*	0.344*	0.436	0.766	0.944	1.172	1.202	1.17	0.426*
		76.9	0.086*	0.344*	0.436	0.666	0.844	1.072	1.302	1.17	0.426*
		77	0.086*	0.344*	0.436	0.666	0.844	1.072	1.302	1.17	0.326*
		77.1	0.086*	0.344*	0.436	0.666	0.744	1.072	1.302	1.17	0.326*
		77.2	-0.014*	0.144*	0.336	0.666	0.844	1.172	1.302	1.17	0.226*
		77.3	0.086*	0.244*	0.336	0.666	0.844	1.172	1.102	1.07	0.226*
		77.4	0.086*	0.244*	0.336	0.666	0.844	1.172	1.102	1.07	0.226*
		77.5	0.086*	0.344*	0.436	0.666	0.844	1.172	1.102	1.17	0.226*
		77.6	0.086*	0.344*	0.436	0.766	0.844	1.072	1.202	1.27	0.326*
		77.7	0.086*	0.344*	0.436	0.666	0.844	1.072	1.202	1.27	0.326*
		77.8	0.086*	0.344*	0.436	0.666	0.744	0.972	1.302	1.17	0.426*
		77.9	-0.014*	0.344*	0.436	0.666	0.744	0.972	1.302	1.17	0.426*
		78	-0.014*	0.344*	0.336	0.566	0.844	1.072	1.302	1.17	0.426*
		78.1	0.086*	0.344*	0.336	0.566	0.944	1.072	1.202	1.07	0.326*
		78.2	0.086*	0.444*	0.336	0.666	0.844	1.072	1.202	1.07	0.326*
		78.3	-0.014*	0.244*	0.336	0.666	0.844	1.172	1.202	1.07	0.326*
		78.4	-0.014*	0.244*	0.336	0.666	0.844	1.172	1.202	1.07	0.326*
		78.5	0.086*	0.344*	0.436	0.566	0.844	1.072	1.102	1.07	0.326*
		78.6	0.086*	0.344*	0.436	0.666	0.744	0.972	1.102	0.97	0.326*
		78.7	0.086*	0.344*	0.436	0.666	0.744	0.972	1.102	0.97	0.326*
		78.8	0.086*	0.344*	0.336	0.566	0.744	0.972	1.302	1.07	0.326*
		78.9	0.086*	0.344*	0.336	0.566	0.844	0.972	1.202	1.07	0.326*
		79	0.086*	0.344*	0.236	0.566	0.744	0.972	1.202	1.07	0.326*
		79.1	0.186*	0.344*	0.236	0.566	0.744	0.972	1.202	1.07	0.326*
		79.2	-0.014*	0.344*	0.236	0.566	0.844	1.072	1.202	1.07	0.326*
		79.3	-0.014*	0.344*	0.336	0.566	0.844	1.172	1.202	1.07	0.326*
		79.4	-0.014*	0.344*	0.336	0.566	0.844	1.172	1.102	1.07	0.326*
		79.5	-0.014*	0.344*	0.336	0.466	0.844	1.172	1.102	0.97	0.426*
		79.6	-0.014*	0.244*	0.336	0.466	0.844	1.172	1.102	0.97	0.426*
		79.7	-0.014*	0.244*	0.236	0.366	0.844	1.072	1.102	1.07	0.326*
		79.8	-0.014*	0.244*	0.336	0.466	0.744	0.972	1.202	1.07	0.326*
		79.9	0.086*	0.344*	0.336	0.566	0.744	0.972	1.102	0.97	0.326*
		80	0.086*	0.344*	0.336	0.566	0.744	0.972	1.102	0.97	0.326*
		80.1	0.086*	0.344*	0.336	0.566	0.844	1.172	1.102	0.97	0.326*
		80.2	0.086*	0.344*	0.236	0.566	0.844	1.172	1.102	1.07	0.326*
		80.3	-0.014*	0.344*	0.236	0.466	0.944	1.172	1.102	0.97	0.326*
		80.4	-0.014*	0.344*	0.236	0.466	0.944	1.172	1.102	0.97	0.326*
		80.5	-0.014*	0.344*	0.236	0.366	0.944	1.172	1.102	0.97	0.326*
		80.6	-0.014*	0.344*	0.236	0.366	0.944	1.172	1.102	1.07	0.226*
		80.7	-0.014*	0.244*	0.336	0.466	0.844	1.072	1.102	1.07	0.226*
		80.8	-0.014*	0.244*	0.336	0.466	0.744	0.972	1.102	0.97	0.226*
		80.9	-0.014*	0.244*	0.336	0.566	0.744	0.972	1.102	0.97	0.326*
		81	0.086*	0.244*	0.336	0.566	0.744	0.972	1.102	0.97	0.326*
		81.1	0.186*	0.344*	0.336	0.566	0.744	1.072	1.002	0.97	0.326*
		81.2	0.086*	0.444*	0.336	0.566	0.844	1.172	1.002	0.87	0.326*
		81.3	0.086*	0.444*	0.236	0.466	0.944	1.172	1.002	0.87	0.326*
		81.4	0.086*	0.444*	0.236	0.466	0.944	1.172	1.102	1.07	0.326*
		81.5	-0.014*	0.344*	0.236	0.466	0.944	1.172	1.102	1.07	0.326*
		81.6	0.086*	0.344*	0.236	0.466	0.844	1.172	1.102	1.07	0.326*
		81.7	0.086*	0.344*	0.236	0.366	0.844	1.172	1.002	0.97	0.426*
		81.8	0.086*	0.244*	0.336	0.466	0.844	1.172	1.002	0.97	0.326*
		81.9	0.086*	0.244*	0.336	0.466	0.744	0.972	0.902	0.87	0.326*
		82	0.086*	0.244*	0.436	0.566	0.744	0.972	1.002	0.87	0.326*
		82.1	0.086*	0.244*	0.336	0.566	0.744	1.072	1.002	0.97	0.326*
		82.2	0.086*	0.244*	0.336	0.566	0.744	1.072	1.002	0.97	0.326*
		82.3	0.186*	0.444*	0.336	0.566	0.744	1.072	1.002	0.97	0.326*
		82.4	0.086*	0.344*	0.236	0.466	0.744	1.072	1.002	0.97	0.226*
		82.5	0.086*	0.344*	0.236	0.466	0.844	1.072	1.002	0.97	0.126*
		82.6	-0.014*	0.344*	0.236	0.566	0.944	1.172	1.102	0.97	0.126*
		82.7	-0.014*	0.344*	0.236	0.466	0.844	1.172	1.102	0.97	0.126*
		82.8	-0.014*	0.344*	0.236	0.466	0.844	1.072	1.102	0.97	0.226*
		82.9	-0.014*	0.344*	0.336	0.466	0.844	1.072	1.002	0.97	0.226*
		83	0.086*	0.344*	0.336	0.466	0.844	1.072	0.902	0.97	0.226*
		83.1	0.086*	0.244*	0.336	0.466	0.844	1.072	0.902	0.97	0.226*
		83.2	0.086*	0.244*	0.336	0.466	0.744	0.972	0.902	0.97	0.226*
		83.3	0.086*	0.244*	0.336	0.466	0.744	1.072	0.902	0.97	0.226*
		83.4	0.086*	0.244*	0.336	0.466	0.744	1.072	0.902	0.97	0.326*
		83.5	0.086*	0.344*	0.336	0.466	0.744	1.072	0.902	0.87	0.326*
		83.6	0.186*	0.444*	0.336	0.466	0.844	1.072	0.902	0.87	0.326*
		83.7	0.086*	0.344*	0.236	0.566	0.844	1.072	0.902	0.87	0.226*
		83.8	0.086*	0.344*	0.236	0.566	0.744	0.972	0.902	0.87	0.226*
		83.9	-0.014*	0.344*	0.236	0.466	0.844	1.072	0.902	0.87	0.326*
		84	0.086*	0.344*	0.236	0.466	0.844	1.072	0.902	0.97	0.226*
		84.1	0.086*	0.344*	0.336	0.466	0.844	1.072	0.902	0.97	0.226*
		84.2	0.086*	0.344*	0.436	0.566	0.844	1.072	0.902	0.87	0.226*
		84.3	0.086*	0.344*	0.436	0.566	0.844	1.072	0.902	0.87	0.226*
		84.4	0.086*	0.244*	0.336	0.566	0.744	0.972	0.902	0.87	0.226*
		84.5	0.086*	0.244*	0.336	0.566	0.744	0.972	0.902	0.87	0.226*
		84.6	0.086*	0.344*	0.336	0.566	0.744	1.072	0.902	0.87	0.226*
		84.7	-0.014*	0.244*	0.336	0.566	0.744	1.072	0.902	0.87	0.226*
		84.8	-0.014*	0.244*	0.336	0.566	0.844	1.072	0.902	0.97	0.226*
		84.9	-0.014*	0.244*	0.336	0.566	0.744	0.972	0.902	0.97	0.226*
		85	-0.014*	0.244*	0.236	0.566	0.744	0.972	0.802	0.87	0.226*
		85.1	-0.014*	0.244*	0.236	0.466	0.744	0.972	0.702	0.87	0.326*
		85.2	0.086*	0.344*	0.236	0.466	0.744	0.972	0.702	0.87	0.326*
		85.3	0.186*	0.344*	0.236	0.466	0.744	0.972	0.902	0.97	0.326*
		85.4	0.086*	0.244*	0.336	0.566	0.744	0.972	0.902	0.87	0.326*
		85.5	0.086*	0.244*	0.336	0.566	0.644	0.872	0.902	0.87	0.326*
		85.6	0.086*	0.244*	0.336	0.566	0.844	1.072	0.902	0.87	0.226*
		85.7	0.086*	0.244*	0.436	0.666	0.844	1.072	0.902	0.87	0.226*
		85.8	0.086*	0.344*	0.336	0.566	0.844	0.972	0.902	0.87	0.226*
		85.9	-0.014*	0.344*	0.336	0.466	0.744	0.972	0.902	0.87	0.226*
		86	-0.014*	0.244*	0.336	0.466	0.744	0.972	0.902	0.87	0.126*
		86.1	-0.014*	0.244*	0.336	0.466	0.744	0.972	0.802	0.87	0.226*
		86.2	-0.014*	0.244*	0.336	0.466	0.744	0.972	0.802	0.87	0.226*
		86.3	0.086*	0.244*	0.236	0.466	0.744	0.972	0.702	0.87	0.226*
		86.4	0.086*	0.244*	0.236	0.466	0.744	0.972	0.702	0.77	0.226*
		86.5	0.086*	0.244*	0.236	0.566	0.744	0.872	0.702	0.77	0.326*
		86.6	-0.014*	0.144*	0.236	0.566	0.744	0.872	0.802	0.77	0.326*
		86.7	-0.014*	0.144*	0.236	0.566	0.744	0.872	0.802	0.77	0.326*
		86.8	0.086*	0.344*	0.136	0.466	0.744	0.872	0.902	0.87	0.326*
		86.9	0.086*	0.344*	0.336	0.566	0.644	0.872	0.802	0.77	0.326*
		87	0.186*	0.344*	0.336	0.566	0.644	0.772	0.802	0.77	0.326*
		87.1	0.186*	0.344*	0.336	0.466	0.644	0.772	0.702	0.77	0.226*
		87.2	0.186*	0.344*	0.336	0.466	0.744	0.972	0.702	0.77	0.226*
		87.3	0.086*	0.244*	0.236	0.566	0.844	0.972	0.702	0.77	0.226*
		87.4	0.086*	0.144*	0.236	0.566	0.844	0.972	0.702	0.87	0.126*
		87.5	-0.014*	0.144*	0.236	0.566	0.844	0.972	0.702	0.77	0.226*
		87.6	-0.014*	0.144*	0.236	0.566	0.744	0.872	0.702	0.77	0.326*
		87.7	-0.014*	0.144*	0.236	0.566	0.744	0.872	0.702	0.77	0.326*
		87.8	-0.014*	0.144*	0.236	0.566	0.744	0.872	0.702	0.77	0.326*
		87.9	-0.014*	0.144*	0.236	0.566	0.744	0.872	0.602	0.67	0.326*
		88	-0.014*	0.244*	0.236	0.566	0.744	0.872	0.702	0.67	0.326*
		88.1	0.186*	0.344*	0.136	0.466	0.744	0.772	0.702	0.67	0.326*
		88.2	0.186*	0.244*	0.236	0.366	0.744	0.772	0.702	0.77	0.326*
		88.3	0.186*	0.244*	0.236	0.366	0.744	0.772	0.702	0.77	0.226*
		88.4	0.086*	0.144*	0.336	0.466	0.744	0.772	0.702	0.77	0.226*
		88.5	0.086*	0.144*	0.336	0.566	0.844	0.872	0.702	0.77	0.126*
		88.6	0.086*	0.144*	0.336	0.566	0.844	0.972	0.702	0.77	0.226*
		88.7	0.086*	0.144*	0.336	0.566	0.844	0.972	0.702	0.67	0.226*
		88.8	-0.014*	0.244*	0.336	0.566	0.844	0.972	0.702	0.67	0.226*
		88.9	-0.014*	0.244*	0.236	0.566	0.844	0.972	0.802	0.67	0.226*
		89	-0.014*	0.244*	0.136	0.466	0.744	0.972	0.802	0.77	0.326*
		89.1	0.086*	0.244*	0.136	0.466	0.744	0.972	0.702	0.67	0.326*
		89.2	0.086*	0.244*	0.236	0.466	0.744	0.972	0.702	0.67	0.326*
		89.3	0.086*	0.244*	0.236	0.466	0.844	0.872	0.802	0.77	0.326*
		89.4	0.086*	0.244*	0.236	0.466	0.844	0.872	0.702	0.77	0.326*
		89.5	0.086*	0.244*	0.236	0.366	0.744	0.772	0.702	0.67	0.326*
		89.6	-0.014*	0.144*	0.236	0.466	0.744	0.772	0.702	0.67	0.326*
		89.7	-0.014*	0.144*	0.236	0.466	0.744	0.772	0.702	0.67	0.226*
		89.8	0.086*	0.344*	0.236	0.466	0.744	0.772	0.702	0.67	0.126*
		89.9	0.086*	0.344*	0.236	0.466	0.744	0.772	0.702	0.67	0.126*
		90	0.086*	0.344*	0.136	0.366	0.744	0.772	0.802	0.67	0.226*
		90.1	0.186*	0.344*	0.136	0.366	0.744	0.872	0.702	0.57	0.226*
		90.2	0.186*	0.244*	0.136	0.366	0.744	0.872	0.702	0.57	0.226*
		90.3	0.186*	0.244*	0.236	0.366	0.744	0.872	0.602	0.57	0.226*
		90.4	0.186*	0.244*	0.236	0.466	0.744	0.872	0.602	0.67	0.226*
		90.5	0.186*	0.244*	0.236	0.566	0.744	0.872	0.602	0.67	0.226*
		90.6	0.186*	0.244*	0.236	0.566	0.744	0.872	0.602	0.67	0.226*
		90.7	0.086*	0.144*	0.236	0.566	0.744	0.872	0.602	0.67	0.226*
		90.8	0.086*	0.144*	0.236	0.566	0.844	0.972	0.702	0.67	0.226*
		90.9	0.086*	0.144*	0.236	0.566	0.844	0.872	0.702	0.57	0.226*
		91	0.186*	0.244*	0.236	0.566	0.844	0.872	0.702	0.57	0.126*
		91.1	0.286*	0.344*	0.236	0.566	0.744	0.772	0.802	0.67	0.126*
		91.2	0.286*	0.344*	0.136	0.366	0.744	0.872	0.802	0.67	0.126*
		91.3	0.186*	0.344*	0.136	0.366	0.744	0.872	0.802	0.67	0.226*
		91.4	0.186*	0.344*	0.136	0.366	0.744	0.872	0.802	0.67	0.226*
		91.5	0.186*	0.344*	0.136	0.366	0.644	0.872	0.702	0.57	0.226*
		91.6	0.186*	0.344*	0.236	0.466	0.744	0.872	0.802	0.67	0.226*
		91.7	0.186*	0.344*	0.236	0.466	0.744	0.872	0.802	0.67	0.226*
		91.8	0.186*	0.244*	0.236	0.466	0.744	0.872	0.802	0.67	0.226*
		91.9	0.186*	0.244*	0.236	0.466	0.744	0.872	0.702	0.67	0.226*
		92	0.186*	0.144*	0.236	0.466	0.744	0.872	0.702	0.67	0.226*
		92.1	0.186*	0.244*	0.236	0.466	0.744	0.872	0.702	0.67	0.126*
		92.2	0.186*	0.244*	0.336	0.466	0.744	0.772	0.702	0.57	0.126*
		92.3	0.186*	0.244*	0.236	0.466	0.744	0.772	0.702	0.57	0.226*
		92.4	0.186*	0.244*	0.136	0.366	0.844	0.872	0.702	0.57	0.226*
		92.5	0.186*	0.244*	0.136	0.466	0.844	0.972	0.802	0.67	0.226*
		92.6	0.186*	0.244*	0.136	0.466	0.744	0.972	0.802	0.67	0.126*
		92.7	0.186*	0.244*	0.136	0.466	0.744	0.972	0.802	0.67	0.126*
		92.8	0.286*	0.344*	0.136	0.466	0.844	0.972	0.702	0.67	0.126*
		92.9	0.286*	0.344*	0.136	0.466	0.844	0.972	0.702	0.67	0.126*
		93	0.186*	0.244*	0.136	0.466	0.744	0.872	0.702	0.67	0.126*
		93.1	0.086*	0.244*	0.236	0.466	0.744	0.872	0.702	0.67	0.226*
		93.2	0.086*	0.244*	0.236	0.466	0.744	0.872	0.702	0.67	0.226*
		93.3	0.086*	0.244*	0.236	0.466	0.744	0.872	0.702	0.67	0.226*
		93.4	0.186*	0.244*	0.236	0.466	0.744	0.872	0.702	0.67	0.226*
		93.5	0.186*	0.344*	0.236	0.566	0.744	0.872	0.702	0.57	0.126*
		93.6	0.186*	0.344*	0.236	0.566	0.744	0.872	0.802	0.57	0.226*
		93.7	0.186*	0.344*	0.236	0.566	0.644	0.772	0.802	0.57	0.126*
		93.8	0.186*	0.344*	0.236	0.466	0.744	0.772	0.802	0.67	0.126*
		93.9	0.186*	0.344*	0.236	0.466	0.744	0.772	0.802	0.67	0.226*
		94	0.186*	0.344*	0.236	0.466	0.744	0.772	0.802	0.67	0.226*
		94.1	0.186*	0.244*	0.236	0.466	0.744	0.772	0.702	0.67	0.226*
		94.2	0.186*	0.244*	0.236	0.466	0.844	0.972	0.702	0.67	0.126*
		94.3	0.186*	0.244*	0.236	0.466	0.844	0.972	0.702	0.67	0.126*
		94.4	0.186*	0.244*	0.236	0.466	0.844	0.972	0.702	0.67	0.126*
		94.5	0.186*	0.244*	0.236	0.466	0.844	0.972	0.702	0.67	0.126*
		94.6	0.186*	0.244*	0.236	0.466	0.744	0.972	0.702	0.67	0.126*
		94.7	0.186*	0.244*	0.236	0.566	0.744	0.972	0.702	0.67	0.226*
		94.8	0.186*	0.344*	0.236	0.566	0.644	0.772	0.702	0.67	0.226*
		94.9	0.286*	0.344*	0.136	0.566	0.644	0.772	0.802	0.67	0.226*
		95	0.286*	0.344*	0.136	0.566	0.644	0.772	0.802	0.67	0.226*
		95.1	0.286*	0.344*	0.236	0.566	0.644	0.872	0.702	0.57	0.226*
		95.2	0.186*	0.244*	0.236	0.566	0.644	0.872	0.702	0.57	0.226*
		95.3	0.186*	0.244*	0.236	0.566	0.644	0.872	0.702	0.57	0.226*
		95.4	0.186*	0.244*	0.236	0.566	0.644	0.872	0.602	0.57	0.226*
		95.5	0.186*	0.244*	0.136	0.466	0.644	0.872	0.702	0.67	0.126*
		95.6	0.186*	0.244*	0.136	0.366	0.644	0.872	0.702	0.67	0.226*
		95.7	0.186*	0.244*	0.136	0.366	0.544	0.772	0.702	0.67	0.226*
		95.8	0.286*	0.344*	0.136	0.366	0.544	0.772	0.702	0.67	0.226*
		95.9	0.286*	0.344*	0.136	0.366	0.644	0.772	0.702	0.77	0.326*
		96	0.186*	0.344*	0.136	0.466	0.744	0.772	0.702	0.77	0.326*
		96.1	0.186*	0.344*	0.136	0.466	0.744	0.772	0.802	0.67	0.326*
		96.2	0.186*	0.344*	0.136	0.466	0.644	0.872	0.702	0.57	0.326*
		96.3	0.186*	0.344*	0.236	0.566	0.644	0.872	0.702	0.57	0.226*
		96.4	0.186*	0.344*	0.236	0.566	0.644	0.872	0.702	0.57	0.226*
		96.5	0.086*	0.244*	0.236	0.566	0.644	0.872	0.702	0.57	0.226*
		96.6	0.086*	0.244*	0.236	0.566	0.644	0.872	0.602	0.57	0.226*
		96.7	0.086*	0.244*	0.236	0.566	0.544	0.772	0.602	0.57	0.226*
		96.8	0.086*	0.244*	0.236	0.566	0.544	0.772	0.602	0.57	0.226*
		96.9	0.086*	0.244*	0.236	0.566	0.544	0.772	0.702	0.57	0.226*
		97	0.086*	0.244*	0.236	0.566	0.544	0.772	0.702	0.67	0.326*
		97.1	0.086*	0.244*	0.236	0.566	0.544	0.772	0.802	0.77	0.226*
		97.2	0.086*	0.244*	0.136	0.466	0.544	0.872	0.802	0.77	0.226*
		97.3	0.086*	0.244*	0.136	0.466	0.644	0.872	0.702	0.67	0.226*
		97.4	0.086*	0.244*	0.136	0.466	0.644	0.872	0.702	0.67	0.226*
		97.5	0.086*	0.244*	0.136	0.466	0.644	0.872	0.702	0.67	0.226*
		97.6	0.086*	0.244*	0.136	0.466	0.644	0.872	0.702	0.57	0.226*
		97.7	0.086*	0.244*	0.136	0.466	0.644	0.872	0.702	0.57	0.226*
		97.8	0.186*	0.244*	0.136	0.466	0.644	0.772	0.702	0.57	0.226*
		97.9	0.186*	0.344*	0.136	0.366	0.544	0.672	0.702	0.57	0.326*
		98	0.186*	0.344*	0.136	0.466	0.544	0.672	0.602	0.57	0.326*
		98.1	0.186*	0.344*	0.136	0.466	0.544	0.672	0.602	0.67	0.326*
		98.2	0.186*	0.344*	0.136	0.466	0.544	0.672	0.702	0.67	0.426*
		98.3	0.086*	0.244*	0.236	0.466	0.644	0.772	0.602	0.57	0.426*
		98.4	0.086*	0.244*	0.136	0.366	0.644	0.772	0.602	0.57	0.426*
		98.5	0.086*	0.244*	0.136	0.366	0.644	0.772	0.602	0.57	0.326*
		98.6	0.086*	0.244*	0.136	0.366	0.544	0.772	0.602	0.57	0.326*
		98.7	0.086*	0.244*	0.136	0.366	0.544	0.772	0.602	0.57	0.326*
		98.8	0.186*	0.244*	0.036	0.366	0.544	0.772	0.602	0.57	0.226*
		98.9	0.186*	0.244*	0.136	0.466	0.644	0.772	0.602	0.57	0.226*
		99	0.086*	0.244*	0.136	0.466	0.544	0.672	0.602	0.47	0.226*
		99.1	0.086*	0.244*	0.136	0.466	0.544	0.672	0.602	0.57	0.326*
		99.2	0.086*	0.244*	0.136	0.466	0.544	0.672	0.602	0.57	0.326*
		99.3	0.086*	0.344*	0.136	0.466	0.544	0.672	0.602	0.57	0.326*
		99.4	0.086*	0.344*	0.036	0.366	0.544	0.672	0.602	0.57	0.326*
		99.5	0.086*	0.344*	0.136	0.366	0.544	0.672	0.502	0.57	0.326*
		99.6	0.086*	0.244*	0.136	0.366	0.544	0.672	0.602	0.57	0.326*
		99.7	0.086*	0.244*	0.136	0.266	0.544	0.672	0.602	0.57	0.426*
		99.8	0.086*	0.244*	0.136	0.366	0.544	0.572	0.602	0.57	0.426*
		99.9	-0.014*	0.144*	0.136	0.366	0.544	0.672	0.502	0.47	0.426*
		100	0.086*	0.144*	0.136	0.366	0.544	0.672	0.502	0.47	0.426*
		100.1	0.086*	0.144*	0.136	0.366	0.544	0.672	0.502	0.47	0.326*
		100.2	0.186*	0.244*	0.136	0.366	0.644	0.672	0.502	0.47	0.326*
		100.3	0.186*	0.244*	0.136	0.366	0.544	0.572	0.502	0.37	0.226*
		100.4	0.186*	0.244*	0.136	0.366	0.544	0.672	0.502	0.37	0.226*
		100.5	0.186*	0.344*	0.136	0.366	0.544	0.672	0.502	0.37	0.226*
		100.6	0.186*	0.344*	0.136	0.366	0.544	0.672	0.502	0.47	0.226*
		100.7	0.186*	0.344*	0.236	0.366	0.544	0.672	0.502	0.47	0.226*
		100.8	0.086*	0.344*	0.136	0.266	0.544	0.672	0.502	0.47	0.326*
		100.9	0.086*	0.244*	0.036	0.266	0.544	0.672	0.602	0.57	0.326*
		101	0.086*	0.244*	0.136	0.366	0.544	0.672	0.502	0.47	0.326*
		101.1	0.086*	0.244*	0.136	0.366	0.544	0.672	0.602	0.57	0.226*
		101.2	0.086*	0.244*	0.136	0.366	0.544	0.672	0.602	0.57	0.226*
		101.3	0.086*	0.244*	0.136	0.366	0.544	0.672	0.502	0.57	0.226*
		101.4	0.086*	0.244*	0.136	0.266	0.644	0.672	0.402	0.47	0.226*
		101.5	0.086*	0.244*	0.136	0.266	0.544	0.572	0.502	0.47	0.326*
		101.6	0.086*	0.244*	0.136	0.366	0.544	0.672	0.502	0.47	0.326*
		101.7	0.086*	0.244*	0.136	0.366	0.544	0.672	0.502	0.47	0.326*
		101.8	0.086*	0.244*	0.136	0.366	0.544	0.672	0.502	0.47	0.326*
		101.9	0.086*	0.244*	0.136	0.366	0.544	0.672	0.502	0.47	0.426*
		102	0.086*	0.244*	0.236	0.366	0.644	0.772	0.502	0.57	0.426*
		102.1	0.086*	0.244*	0.236	0.366	0.644	0.672	0.502	0.47	0.426*
		102.2	0.086*	0.244*	0.136	0.266	0.644	0.672	0.502	0.47	0.426*
		102.3	0.086*	0.244*	0.136	0.266	0.544	0.672	0.502	0.47	0.326*
		102.4	0.086*	0.244*	0.136	0.266	0.544	0.672	0.502	0.47	0.326*
		102.5	0.086*	0.344*	0.136	0.266	0.444	0.572	0.502	0.47	0.326*
		102.6	0.186*	0.344*	0.136	0.266	0.444	0.572	0.502	0.47	0.326*
		102.7	0.186*	0.344*	0.136	0.266	0.444	0.572	0.502	0.47	0.226*
		102.8	0.086*	0.244*	0.236	0.366	0.444	0.572	0.702	0.57	0.226*
		102.9	0.086*	0.144*	0.236	0.366	0.444	0.572	0.602	0.57	0.226*
		103	0.186*	0.244*	0.236	0.466	0.544	0.572	0.602	0.57	0.226*
		103.1	0.186*	0.244*	0.336	0.466	0.544	0.572	0.502	0.47	0.226*
		103.2	0.186*	0.244*	0.336	0.466	0.544	0.572	0.502	0.47	0.226*
		103.3	0.186*	0.244*	0.336	0.466	0.544	0.572	0.502	0.47	0.226*
		103.4	0.086*	0.244*	0.336	0.466	0.544	0.572	0.502	0.47	0.226*
		103.5	0.186*	0.244*	0.336	0.466	0.544	0.572	0.502	0.37	0.326*
		103.6	0.086*	0.244*	0.336	0.466	0.544	0.572	0.502	0.37	0.326*
		103.7	0.086*	0.244*	0.336	0.466	0.444	0.572	0.502	0.47	0.326*
		103.8	-0.014*	0.244*	0.336	0.466	0.444	0.572	0.502	0.47	0.426*
		103.9	0.086*	0.244*	0.236	0.566	0.444	0.472	0.602	0.47	0.426*
		104	0.086*	0.244*	0.236	0.566	0.444	0.472	0.602	0.47	0.426*
		104.1	0.086*	0.244*	0.236	0.466	0.444	0.472	0.602	0.47	0.326*
		104.2	0.086*	0.244*	0.236	0.466	0.444	0.472	0.502	0.37	0.326*
		104.3	0.086*	0.244*	0.236	0.466	0.444	0.472	0.602	0.47	0.326*
		104.4	0.086*	0.244*	0.236	0.366	0.544	0.472	0.602	0.47	0.326*
		104.5	0.086*	0.244*	0.236	0.366	0.444	0.472	0.602	0.47	0.326*
		104.6	0.086*	0.244*	0.236	0.366	0.444	0.472	0.502	0.47	0.326*
		104.7	0.086*	0.244*	0.236	0.366	0.444	0.472	0.502	0.47	0.326*
		104.8	0.086*	0.244*	0.236	0.366	0.444	0.472	0.502	0.47	0.426*
		104.9	0.086*	0.244*	0.236	0.366	0.544	0.572	0.502	0.47	0.426*
		105	-0.014*	0.144*	0.236	0.366	0.544	0.672	0.502	0.37	0.326*
		105.1	0.086*	0.244*	0.236	0.466	0.444	0.572	0.502	0.37	0.326*
		105.2	0.086*	0.244*	0.236	0.466	0.444	0.572	0.602	0.37	0.326*
		105.3	0.086*	0.244*	0.236	0.466	0.444	0.472	0.502	0.27	0.326*
		105.4	0.086*	0.244*	0.236	0.366	0.444	0.472	0.502	0.27	0.326*
		105.5	0.086*	0.244*	0.236	0.366	0.444	0.472	0.502	0.27	0.326*
		105.6	0.086*	0.244*	0.336	0.366	0.444	0.472	0.502	0.27	0.326*
		105.7	0.186*	0.244*	0.336	0.366	0.444	0.472	0.502	0.37	0.326*
		105.8	0.186*	0.244*	0.336	0.366	0.444	0.472	0.502	0.37	0.226*
		105.9	0.186*	0.244*	0.436	0.466	0.444	0.472	0.602	0.47	0.226*
		106	0.186*	0.244*	0.436	0.466	0.444	0.472	0.602	0.47	0.226*
		106.1	0.186*	0.244*	0.336	0.466	0.444	0.572	0.602	0.47	0.226*
		106.2	0.186*	0.244*	0.336	0.566	0.444	0.572	0.602	0.47	0.226*
		106.3	0.186*	0.244*	0.336	0.566	0.444	0.572	0.602	0.47	0.226*
		106.4	0.186*	0.244*	0.336	0.566	0.444	0.572	0.602	0.47	0.226*
		106.5	0.186*	0.244*	0.336	0.566	0.444	0.572	0.602	0.47	0.226*
		106.6	0.186*	0.244*	0.336	0.566	0.344	0.472	0.502	0.47	0.226*
		106.7	0.186*	0.244*	0.236	0.466	0.344	0.472	0.502	0.47	0.326*
		106.8	0.086*	0.244*	0.236	0.466	0.344	0.472	0.502	0.37	0.326*
		106.9	0.086*	0.244*	0.236	0.466	0.344	0.472	0.602	0.37	0.326*
		107	0.086*	0.144*	0.236	0.466	0.344	0.372	0.602	0.37	0.326*
		107.1	-0.014*	0.144*	0.236	0.466	0.344	0.372	0.502	0.27	0.326*
		107.2	-0.014*	0.144*	0.236	0.466	0.344	0.372	0.502	0.27	0.226*
		107.3	-0.014*	0.144*	0.336	0.466	0.344	0.372	0.502	0.27	0.326*
		107.4	-0.014*	0.144*	0.336	0.466	0.444	0.372	0.502	0.37	0.326*
		107.5	-0.014*	0.144*	0.336	0.466	0.444	0.472	0.502	0.37	0.326*
		107.6	0.086*	0.144*	0.436	0.466	0.544	0.572	0.502	0.37	0.226*
		107.7	0.086*	0.144*	0.436	0.466	0.444	0.572	0.502	0.37	0.226*
		107.8	0.086*	0.144*	0.336	0.466	0.444	0.572	0.502	0.37	0.226*
		107.9	0.086*	0.144*	0.336	0.566	0.444	0.572	0.502	0.37	0.226*
		108	0.086*	0.144*	0.336	0.566	0.444	0.572	0.502	0.37	0.226*
		108.1	0.086*	0.144*	0.336	0.566	0.444	0.572	0.502	0.27	0.226*
		108.2	0.086*	0.144*	0.336	0.566	0.444	0.572	0.402	0.27	0.226*
		108.3	0.086*	0.244*	0.336	0.566	0.444	0.572	0.502	0.37	0.226*
		108.4	0.086*	0.244*	0.336	0.566	0.444	0.572	0.502	0.37	0.226*
		108.5	0.086*	0.244*	0.336	0.566	0.444	0.572	0.502	0.37	0.226*
		108.6	0.086*	0.244*	0.336	0.566	0.444	0.672	0.402	0.27	0.226*
		108.7	0.086*	0.244*	0.236	0.466	0.444	0.572	0.402	0.27	0.226*
		108.8	0.086*	0.244*	0.236	0.466	0.344	0.472	0.402	0.27	0.126*
		108.9	0.086*	0.244*	0.236	0.466	0.344	0.472	0.402	0.27	0.126*
		109	0.086*	0.244*	0.236	0.466	0.444	0.472	0.402	0.27	0.126*
		109.1	-0.014*	0.144*	0.236	0.466	0.444	0.472	0.502	0.37	0.126*
		109.2	-0.014*	0.144*	0.236	0.466	0.444	0.472	0.502	0.37	0.226*
		109.3	-0.014*	0.144*	0.236	0.466	0.444	0.472	0.502	0.37	0.326*
		109.4	-0.014*	0.144*	0.236	0.466	0.444	0.472	0.502	0.37	0.326*
		109.5	-0.014*	0.144*	0.336	0.466	0.544	0.572	0.502	0.37	0.226*
		109.6	-0.014*	0.144*	0.336	0.466	0.444	0.572	0.502	0.37	0.226*
		109.7	-0.014*	0.244*	0.336	0.466	0.444	0.572	0.502	0.37	0.226*
		109.8	0.086*	0.244*	0.336	0.466	0.444	0.572	0.502	0.37	0.226*
		109.9	0.086*	0.244*	0.336	0.466	0.444	0.572	0.402	0.37	0.226*
		110	0.086*	0.244*	0.336	0.466	0.444	0.672	0.302	0.17	0.226*
		110.1	0.086*	0.244*	0.436	0.566	0.444	0.672	0.302	0.17	0.226*
		110.2	0.086*	0.244*	0.436	0.566	0.544	0.672	0.302	0.17	0.226*
		110.3	0.086*	0.244*	0.436	0.566	0.544	0.672	0.302	0.17	0.226*
		110.4	0.086*	0.244*	0.436	0.566	0.544	0.672	0.302	0.17	0.226*
		110.5	0.086*	0.244*	0.436	0.566	0.544	0.672	0.302	0.17	0.226*
		110.6	-0.014*	0.144*	0.336	0.466	0.544	0.672	0.302	0.27	0.226*
		110.7	-0.014*	0.044*	0.336	0.466	0.444	0.472	0.302	0.27	0.226*
		110.8	-0.014*	0.044*	0.336	0.566	0.444	0.472	0.402	0.27	0.226*
		110.9	-0.014*	0.044*	0.336	0.566	0.444	0.472	0.402	0.27	0.226*
		111	-0.014*	0.044*	0.336	0.566	0.444	0.472	0.302	0.17	0.226*
		111.1	-0.014*	0.144*	0.336	0.566	0.444	0.472	0.302	0.17	0.326*
		111.2	-0.114*	0.144*	0.236	0.566	0.444	0.472	0.302	0.17	0.326*
		111.3	-0.114*	0.144*	0.336	0.466	0.444	0.472	0.302	0.17	0.326*
		111.4	-0.014*	0.144*	0.336	0.466	0.444	0.472	0.302	0.17	0.326*
		111.5	-0.014*	0.144*	0.336	0.466	0.544	0.572	0.302	0.17	0.326*
		111.6	-0.014*	0.144*	0.336	0.466	0.644	0.672	0.302	0.17	0.326*
		111.7	-0.014*	0.144*	0.336	0.466	0.644	0.672	0.302	0.27	0.326*
		111.8	-0.114*	0.044*	0.336	0.466	0.644	0.672	0.402	0.37	0.326*
		111.9	-0.114*	0.044*	0.336	0.466	0.644	0.672	0.302	0.37	0.326*
		112	-0.114*	0.044*	0.236	0.366	0.644	0.572	0.302	0.37	0.326*
		112.1	-0.114*	0.044*	0.236	0.366	0.644	0.572	0.402	0.37	0.326*
		112.2	-0.114*	0.044*	0.236	0.366	0.644	0.572	0.302	0.27	0.326*
		112.3	-0.114*	0.044*	0.236	0.366	0.644	0.572	0.302	0.27	0.326*
		112.4	-0.014*	0.144*	0.236	0.366	0.644	0.572	0.302	0.27	0.326*
		112.5	-0.014*	0.244*	0.236	0.366	0.644	0.572	0.302	0.27	0.226*
		112.6	-0.014*	0.244*	0.236	0.466	0.644	0.672	0.302	0.27	0.226*
		112.7	-0.014*	0.144*	0.236	0.466	0.644	0.672	0.302	0.27	0.126*
		112.8	-0.014*	0.144*	0.336	0.566	0.544	0.572	0.302	0.27	0.126*
		112.9	-0.014*	0.144*	0.436	0.566	0.544	0.572	0.302	0.37	0.126*
		113	-0.014*	0.144*	0.436	0.466	0.544	0.572	0.302	0.37	0.126*
		113.1	-0.014*	0.144*	0.436	0.466	0.544	0.572	0.302	0.37	0.126*
		113.2	-0.014*	0.144*	0.236	0.366	0.544	0.572	0.302	0.37	0.126*
		113.3	0.086*	0.144*	0.236	0.366	0.544	0.572	0.302	0.37	0.226*
		113.4	0.086*	0.144*	0.236	0.366	0.544	0.572	0.302	0.37	0.226*
		113.5	-0.014*	0.044*	0.236	0.366	0.544	0.472	0.402	0.37	0.226*
		113.6	-0.014*	0.044*	0.236	0.366	0.544	0.472	0.402	0.37	0.126*
		113.7	-0.014*	0.044*	0.236	0.366	0.544	0.472	0.402	0.37	0.126*
		113.8	-0.014*	0.044*	0.236	0.366	0.544	0.472	0.402	0.37	0.126*
		113.9	-0.014*	0.044*	0.336	0.366	0.644	0.572	0.502	0.47	0.126*
		114	-0.014*	0.044*	0.336	0.366	0.644	0.572	0.402	0.47	0.126*
		114.1	-0.014*	0.044*	0.336	0.366	0.644	0.572	0.402	0.47	0.126*
		114.2	0.086*	0.244*	0.336	0.366	0.644	0.672	0.402	0.37	0.226*
		114.3	-0.014*	0.244*	0.336	0.366	0.644	0.672	0.402	0.37	0.126*
		114.4	-0.014*	0.244*	0.336	0.466	0.644	0.672	0.402	0.37	0.226*
		114.5	-0.014*	0.244*	0.136	0.366	0.644	0.672	0.402	0.37	0.226*
		114.6	-0.014*	0.244*	0.136	0.366	0.544	0.572	0.402	0.37	0.226*
		114.7	-0.114*	0.144*	0.136	0.366	0.544	0.572	0.402	0.37	0.226*
		114.8	-0.014*	0.144*	0.136	0.366	0.644	0.572	0.402	0.37	0.226*
		114.9	-0.014*	0.144*	0.136	0.366	0.644	0.572	0.502	0.37	0.226*
		115	-0.014*	0.144*	0.236	0.466	0.644	0.572	0.402	0.27	0.226*
		115.1	-0.014*	0.144*	0.236	0.466	0.644	0.572	0.402	0.27	0.226*
		115.2	-0.014*	0.144*	0.236	0.366	0.644	0.572	0.402	0.27	0.226*
		115.3	-0.014*	0.144*	0.236	0.366	0.644	0.572	0.402	0.27	0.226*
		115.4	-0.014*	0.144*	0.236	0.366	0.644	0.572	0.402	0.27	0.226*
		115.5	-0.014*	0.144*	0.136	0.266	0.644	0.572	0.402	0.27	0.226*
		115.6	-0.014*	0.144*	0.236	0.266	0.544	0.472	0.402	0.27	0.226*
		115.7	-0.014*	0.144*	0.236	0.266	0.544	0.472	0.402	0.27	0.226*
		115.8	-0.014*	0.144*	0.236	0.366	0.544	0.472	0.402	0.27	0.226*
		115.9	-0.014*	0.144*	0.236	0.366	0.544	0.472	0.402	0.27	0.126*
		116	-0.014*	0.144*	0.136	0.366	0.544	0.472	0.402	0.27	0.226*
		116.1	0.086*	0.344*	0.136	0.366	0.544	0.572	0.402	0.37	0.226*
		116.2	0.086*	0.244*	0.136	0.366	0.544	0.572	0.402	0.37	0.226*
		116.3	-0.014*	0.244*	0.136	0.366	0.544	0.572	0.402	0.37	0.226*
		116.4	0.086*	0.244*	0.136	0.366	0.544	0.572	0.402	0.37	0.226*
		116.5	-0.014*	0.244*	0.136	0.366	0.644	0.572	0.402	0.37	0.226*
		116.6	-0.014*	0.244*	0.136	0.366	0.644	0.572	0.402	0.37	0.226*
		116.7	-0.014*	0.244*	0.136	0.366	0.644	0.572	0.402	0.37	0.326*
		116.8	-0.014*	0.244*	0.136	0.266	0.644	0.572	0.302	0.27	0.326*
		116.9	-0.014*	0.244*	0.136	0.266	0.544	0.472	0.402	0.27	0.426*
		117	-0.014*	0.244*	0.136	0.266	0.544	0.472	0.402	0.27	0.426*
		117.1	-0.014*	0.244*	0.136	0.266	0.444	0.472	0.402	0.27	0.426*
		117.2	-0.014*	0.244*	0.136	0.166	0.444	0.472	0.402	0.27	0.426*
		117.3	-0.014*	0.244*	0.136	0.166	0.444	0.472	0.402	0.27	0.326*
		117.4	-0.114*	0.144*	0.136	0.166	0.544	0.572	0.402	0.27	0.326*
		117.5	-0.014*	0.144*	0.136	0.166	0.544	0.572	0.402	0.27	0.326*
		117.6	-0.014*	0.144*	0.236	0.366	0.544	0.572	0.402	0.27	0.326*
		117.7	-0.014*	0.144*	0.236	0.366	0.544	0.572	0.402	0.27	0.326*
		117.8	-0.014*	0.144*	0.236	0.366	0.544	0.572	0.402	0.27	0.326*
		117.9	-0.014*	0.144*	0.236	0.366	0.544	0.472	0.402	0.27	0.326*
		118	-0.014*	0.144*	0.136	0.366	0.544	0.472	0.402	0.27	0.326*
		118.1	-0.014*	0.244*	0.036	0.266	0.544	0.472	0.502	0.37	0.326*
		118.2	-0.014*	0.244*	0.036	0.266	0.544	0.472	0.402	0.37	0.326*
		118.3	0.086*	0.344*	0.036	0.266	0.444	0.372	0.402	0.37	0.326*
		118.4	0.086*	0.344*	0.136	0.266	0.444	0.372	0.302	0.17	0.326*
		118.5	0.086*	0.244*	0.136	0.266	0.544	0.372	0.302	0.17	0.326*
		118.6	0.086*	0.244*	0.136	0.266	0.544	0.472	0.302	0.17	0.226*
		118.7	-0.014*	0.144*	0.136	0.266	0.544	0.472	0.302	0.17	0.226*
		118.8	-0.014*	0.144*	0.136	0.366	0.544	0.472	0.302	0.17	0.226*
		118.9	-0.014*	0.144*	0.136	0.366	0.544	0.472	0.302	0.27	0.326*
		119	-0.014*	0.144*	0.136	0.366	0.544	0.472	0.302	0.27	0.326*
		119.1	0.086*	0.144*	0.236	0.466	0.544	0.472	0.402	0.27	0.326*
		119.2	0.086*	0.144*	0.236	0.466	0.544	0.472	0.402	0.27	0.326*
		119.3	0.086*	0.144*	0.236	0.466	0.544	0.472	0.402	0.27	0.326*
		119.4	0.086*	0.144*	0.236	0.466	0.544	0.472	0.402	0.27	0.426*
		119.5	0.086*	0.144*	0.236	0.366	0.544	0.472	0.402	0.27	0.426*
		119.6	-0.014*	0.144*	0.236	0.366	0.444	0.372	0.402	0.27	0.326*
		119.7	-0.014*	0.144*	0.236	0.366	0.344	0.372	0.402	0.27	0.326*
		119.8	-0.014*	0.144*	0.236	0.466	0.444	0.472	0.402	0.27	0.326*
		119.9	-0.014*	0.144*	0.236	0.466	0.444	0.472	0.402	0.27	0.326*
		120	-0.014*	0.144*	0.236	0.466	0.444	0.572	0.402	0.27	0.326*
		120.1	-0.014*	0.144*	0.236	0.466	0.444	0.572	0.402	0.37	0.326*
		120.2	-0.014*	0.144*	0.236	0.466	0.444	0.472	0.402	0.37	0.326*
		120.3	-0.014*	0.244*	0.136	0.366	0.444	0.472	0.402	0.37	0.326*
		120.4	-0.114*	0.144*	0.136	0.466	0.444	0.472	0.402	0.37	0.326*
		120.5	-0.114*	0.144*	0.136	0.366	0.544	0.472	0.402	0.37	0.326*
		120.6	-0.114*	0.144*	0.136	0.366	0.544	0.472	0.402	0.37	0.326*
		120.7	-0.114*	0.144*	0.136	0.366	0.544	0.472	0.402	0.37	0.326*
		120.8	-0.114*	0.044*	0.136	0.366	0.544	0.472	0.402	0.37	0.326*
		120.9	-0.114*	0.044*	0.136	0.366	0.544	0.472	0.402	0.37	0.226*
		121	-0.114*	0.044*	0.136	0.366	0.444	0.372	0.302	0.37	0.326*
		121.1	-0.114*	0.044*	0.136	0.366	0.444	0.372	0.302	0.37	0.426*
		121.2	-0.014*	0.044*	0.136	0.366	0.444	0.372	0.202	0.27	0.426*
		121.3	-0.014*	0.044*	0.136	0.466	0.444	0.472	0.202	0.17	0.326*
		121.4	-0.014*	0.044*	0.136	0.466	0.444	0.472	0.302	0.17	0.326*
		121.5	-0.014*	0.044*	0.136	0.366	0.444	0.472	0.302	0.17	0.326*
		121.6	-0.014*	0.044*	0.136	0.366	0.444	0.472	0.302	0.17	0.326*
		121.7	-0.014*	0.144*	0.136	0.366	0.444	0.472	0.302	0.17	0.326*
		121.8	-0.114*	0.044*	0.136	0.366	0.544	0.572	0.302	0.17	0.326*
		121.9	-0.214*	0.044*	0.136	0.366	0.544	0.572	0.302	0.17	0.326*
		122	-0.214*	0.044*	0.136	0.366	0.544	0.472	0.302	0.17	0.326*
		122.1	-0.214*	0.044*	0.136	0.366	0.544	0.472	0.302	0.27	0.326*
		122.2	-0.214*	0.044*	0.136	0.366	0.544	0.472	0.302	0.27	0.326*
		122.3	-0.214*	0.044*	0.136	0.366	0.544	0.472	0.302	0.27	0.326*
		122.4	-0.214*	0.044*	0.236	0.466	0.544	0.472	0.302	0.27	0.426*
		122.5	-0.214*	0.044*	0.236	0.466	0.544	0.472	0.402	0.37	0.426*
		122.6	-0.214*	0.044*	0.236	0.466	0.544	0.472	0.302	0.27	0.426*
		122.7	-0.114*	0.144*	0.236	0.466	0.544	0.472	0.302	0.27	0.426*
		122.8	-0.114*	0.144*	0.236	0.466	0.644	0.472	0.302	0.27	0.426*
		122.9	-0.114*	0.144*	0.136	0.466	0.544	0.572	0.302	0.27	0.426*
		123	-0.014*	0.144*	0.136	0.466	0.544	0.572	0.302	0.27	0.326*
		123.1	-0.014*	0.044*	0.136	0.466	0.544	0.572	0.302	0.27	0.326*
		123.2	-0.014*	0.044*	0.136	0.466	0.444	0.472	0.402	0.27	0.226*
		123.3	-0.014*	0.144*	0.036	0.366	0.444	0.472	0.402	0.27	0.226*
		123.4	-0.014*	0.144*	0.036	0.366	0.444	0.472	0.402	0.27	0.226*
		123.5	-0.014*	0.144*	0.036	0.266	0.444	0.472	0.302	0.27	0.226*
		123.6	-0.014*	0.144*	0.036	0.266	0.444	0.472	0.302	0.27	0.226*
		123.7	-0.014*	0.144*	0.036	0.266	0.444	0.472	0.202	0.17	0.326*
		123.8	-0.014*	0.144*	0.036	0.266	0.444	0.472	0.202	0.17	0.326*
		123.9	-0.114*	0.044*	0.036	0.266	0.444	0.472	0.202	0.17	0.426*
		124	-0.214*	0.044*	0.036	0.266	0.444	0.472	0.202	0.17	0.426*
		124.1	-0.214*	0.044*	0.036	0.266	0.444	0.472	0.202	0.17	0.426*
		124.2	-0.214*	0.044*	0.036	0.266	0.444	0.472	0.202	0.17	0.426*
		124.3	-0.114*	0.044*	0.036	0.266	0.444	0.472	0.202	0.27	0.426*
		124.4	-0.114*	0.044*	0.136	0.266	0.544	0.472	0.202	0.27	0.426*
		124.5	-0.114*	0.044*	0.136	0.266	0.544	0.472	0.202	0.27	0.426*
		124.6	-0.114*	0.044*	0.136	0.266	0.544	0.572	0.202	0.27	0.426*
		124.7	-0.014*	0.144*	0.136	0.266	0.544	0.572	0.302	0.27	0.426*
		124.8	-0.014*	0.144*	0.036	0.166	0.644	0.572	0.302	0.27	0.426*
		124.9	-0.014*	0.144*	0.136	0.266	0.644	0.572	0.302	0.27	0.426*
		125	-0.014*	0.144*	0.136	0.266	0.644	0.572	0.402	0.27	0.326*
		125.1	-0.014*	0.144*	0.136	0.266	0.644	0.572	0.302	0.27	0.326*
		125.2	-0.014*	0.144*	0.136	0.266	0.644	0.572	0.202	0.17	0.326*
		125.3	-0.014*	0.144*	0.036	0.266	0.644	0.572	0.202	0.17	0.326*
		125.4	-0.014*	0.244*	0.036	0.366	0.644	0.572	0.202	0.17	0.426*
		125.5	-0.014*	0.244*	0.036	0.366	0.644	0.572	0.202	0.17	0.426*
		125.6	-0.014*	0.244*	0.036	0.366	0.644	0.572	0.202	0.17	0.426*
		125.7	-0.014*	0.244*	-0.064	0.266	0.544	0.572	0.202	0.17	0.426*
		125.8	-0.014*	0.144*	0.036	0.266	0.544	0.572	0.202	0.17	0.326*
		125.9	0.086*	0.244*	0.036	0.166	0.544	0.572	0.202	0.17	0.326*
		126	0.186*	0.244*	0.036	0.166	0.544	0.572	0.202	0.27	0.326*
		126.1	0.186*	0.244*	0.036	0.166	0.544	0.572	0.202	0.27	0.326*
		126.2	0.186*	0.244*	0.036	0.166	0.544	0.572	0.202	0.27	0.326*
		126.3	0.186*	0.244*	0.036	0.166	0.444	0.472	0.202	0.27	0.226*
		126.4	0.186*	0.244*	0.036	0.166	0.444	0.472	0.302	0.27	0.326*
		126.5	0.086*	0.244*	0.036	0.166	0.444	0.572	0.302	0.27	0.326*
		126.6	0.086*	0.244*	0.036	0.166	0.544	0.572	0.202	0.17	0.326*
		126.7	-0.014*	0.144*	0.036	0.166	0.644	0.672	0.202	0.17	0.326*
		126.8	-0.014*	0.144*	0.136	0.266	0.644	0.672	0.202	0.07	0.326*
		126.9	-0.014*	0.144*	0.136	0.266	0.644	0.572	0.202	0.07	0.326*
		127	-0.014*	0.144*	0.136	0.266	0.644	0.572	0.202	0.07	0.326*
		127.1	-0.014*	0.144*	0.136	0.266	0.644	0.572	0.202	0.07	0.326*
		127.2	-0.014*	0.144*	0.136	0.266	0.644	0.572	0.202	0.07	0.326*
		127.3	-0.014*	0.144*	-0.064	0.166	0.644	0.572	0.202	0.07	0.326*
		127.4	-0.014*	0.144*	-0.064	0.166	0.644	0.572	0.202	0.07	0.226*
		127.5	-0.014*	0.144*	0.036	0.166	0.644	0.572	0.202	0.07	0.226*
		127.6	0.186*	0.244*	0.036	0.166	0.644	0.572	0.202	0.07	0.326*
		127.7	0.186*	0.244*	0.036	0.166	0.644	0.572	0.202	0.07	0.326*
		127.8	0.186*	0.244*	0.036	0.166	0.644	0.572	0.202	0.07	0.426*
		127.9	0.186*	0.244*	0.036	0.266	0.544	0.472	0.102	0.07	0.426*
		128	0.086*	0.244*	0.036	0.266	0.544	0.472	0.102	0.07	0.426*
		128.1	0.086*	0.244*	0.036	0.266	0.544	0.472	0.102	0.07	0.426*
		128.2	0.086*	0.244*	0.036	0.166	0.544	0.472	0.102	0.17	0.426*
		128.3	0.086*	0.244*	0.036	0.166	0.544	0.572	0.202	0.17	0.326*
		128.4	0.086*	0.244*	0.036	0.166	0.544	0.572	0.202	0.17	0.326*
		128.5	-0.014*	0.244*	0.036	0.166	0.544	0.572	0.102	0.07	0.326*
		128.6	-0.014*	0.244*	0.036	0.166	0.544	0.572	0.202	0.17	0.326*
		128.7	-0.014*	0.244*	0.036	0.166	0.644	0.472	0.202	0.17	0.326*
		128.8	-0.014*	0.244*	0.136	0.266	0.544	0.472	0.202	0.07	0.226*
		128.9	-0.014*	0.144*	0.136	0.266	0.644	0.472	0.202	0.07	0.226*
		129	-0.014*	0.144*	0.136	0.266	0.344	0.272	0.202	0.07	0.226*
		129.1	-0.014*	0.144*	0.136	0.266	0.444	0.372	0.202	0.07	0.226*
		129.2	0.086*	0.144*	0.136	0.266	0.444	0.372	0.202	0.07	0.226*
		129.3	0.086*	0.144*	0.136	0.266	0.444	0.472	0.202	0.07	0.226*
		129.4	0.086*	0.144*	0.136	0.266	0.444	0.472	0.202	0.07	0.126*
		129.5	0.086*	0.144*	0.136	0.366	0.444	0.472	0.202	0.07	0.126*
		129.6	0.086*	0.144*	0.136	0.366	0.444	0.472	0.202	0.07	0.226*
		129.7	0.086*	0.144*	0.136	0.366	0.444	0.472	0.202	0.17	0.226*
		129.8	0.086*	0.144*	0.136	0.366	0.444	0.472	0.202	0.17	0.226*
		129.9	0.086*	0.144*	0.136	0.366	0.444	0.472	0.202	0.17	0.226*
		130	0.086*	0.244*	0.136	0.366	0.444	0.472	0.202	0.17	0.226*
		130.1	0.086*	0.244*	0.136	0.366	0.444	0.472	0.302	0.17	0.326*
		130.2	0.086*	0.244*	0.236	0.366	0.444	0.472	0.202	0.17	0.326*
		130.3	0.086*	0.244*	0.236	0.366	0.344	0.372	0.202	0.17	0.326*
		130.4	0.086*	0.244*	0.136	0.266	0.344	0.372	0.202	0.17	0.326*
		130.5	0.086*	0.244*	0.136	0.266	0.344	0.372	0.202	0.17	0.326*
		130.6	0.086*	0.144*	0.136	0.266	0.344	0.372	0.202	0.17	0.326*
		130.7	0.086*	0.044*	0.136	0.166	0.344	0.472	0.202	0.17	0.326*
		130.8	0.086*	0.044*	0.136	0.166	0.344	0.472	0.102	0.07	0.326*
		130.9	0.086*	0.044*	0.136	0.166	0.344	0.372	0.102	0.07	0.326*
		131	0.086*	0.044*	0.136	0.166	0.344	0.372	0.202	0.17	0.326*
		131.1	0.086*	0.044*	0.236	0.366	0.344	0.372	0.202	0.17	0.226*
		131.2	-0.014*	0.044*	0.236	0.366	0.344	0.372	0.202	0.17	0.226*
		131.3	-0.014*	0.044*	0.136	0.366	0.344	0.372	0.202	0.07	0.326*
		131.4	-0.014*	0.144*	0.136	0.366	0.344	0.372	0.202	0.07	0.326*
		131.5	-0.014*	0.144*	0.136	0.366	0.344	0.372	0.202	0.07	0.326*
		131.6	-0.014*	0.144*	0.136	0.366	0.344	0.372	0.202	0.07	0.326*
		131.7	-0.014*	0.144*	0.136	0.366	0.244	0.272	0.202	0.17	0.326*
		131.8	-0.014*	0.144*	0.136	0.366	0.244	0.272	0.202	0.17	0.326*
		131.9	-0.014*	0.144*	0.136	0.366	0.244	0.272	0.202	0.17	0.426*
		132	0.086*	0.144*	0.136	0.366	0.344	0.372	0.202	0.17	0.426*
		132.1	0.086*	0.044*	0.136	0.366	0.344	0.472	0.202	0.17	0.426*
		132.2	0.086*	0.044*	0.236	0.366	0.344	0.472	0.202	0.17	0.426*
		132.3	0.086*	0.044*	0.236	0.366	0.344	0.472	0.302	0.17	0.426*
		132.4	0.086*	0.044*	0.236	0.466	0.344	0.472	0.302	0.17	0.426*
		132.5	0.086*	0.044*	0.136	0.366	0.344	0.472	0.302	0.17	0.426*
		132.6	0.086*	0.044*	0.136	0.366	0.344	0.472	0.302	0.17	0.426*
		132.7	0.086*	0.044*	0.136	0.366	0.344	0.372	0.202	0.07	0.426*
		132.8	0.186*	0.144*	0.136	0.366	0.244	0.372	0.202	0.07	0.326*
		132.9	0.186*	0.244*	0.136	0.366	0.244	0.372	0.202	0.07	0.326*
		133	0.186*	0.244*	0.136	0.366	0.244	0.372	0.202	0.07	0.326*
		133.1	0.186*	0.244*	0.136	0.366	0.244	0.372	0.102	0.07	0.326*
		133.2	0.186*	0.244*	0.136	0.366	0.244	0.372	0.102	0.17	0.326*
		133.3	0.086*	0.144*	0.136	0.366	0.244	0.372	0.102	0.17	0.326*
		133.4	0.086*	0.144*	0.136	0.366	0.344	0.372	0.102	0.17	0.226*
		133.5	0.086*	0.144*	0.136	0.366	0.444	0.472	0.102	0.17	0.326*
		133.6	0.086*	0.144*	0.136	0.266	0.444	0.472	0.102	0.17	0.326*
		133.7	0.086*	0.144*	0.136	0.266	0.344	0.372	0.202	0.27	0.426*
		133.8	0.086*	0.144*	0.036	0.266	0.344	0.372	0.202	0.17	0.426*
		133.9	0.086*	0.144*	0.036	0.266	0.344	0.372	0.202	0.17	0.426*
		134	-0.014*	0.144*	0.136	0.266	0.344	0.372	0.302	0.17	0.426*
		134.1	0.086*	0.144*	0.136	0.266	0.344	0.372	0.302	0.17	0.426*
		134.2	0.086*	0.144*	0.036	0.166	0.344	0.372	0.302	0.17	0.426*
		134.3	0.086*	0.144*	0.036	0.266	0.344	0.372	0.302	0.17	0.426*
		134.4	0.086*	0.144*	0.136	0.366	0.344	0.372	0.302	0.17	0.426*
		134.5	0.086*	0.144*	0.136	0.366	0.244	0.372	0.302	0.27	0.426*
		134.6	0.086*	0.144*	0.136	0.366	0.244	0.372	0.302	0.27	0.426*
		134.7	0.086*	0.144*	0.136	0.366	0.244	0.372	0.302	0.27	0.426*
		134.8	0.086*	0.144*	0.136	0.366	0.244	0.372	0.302	0.27	0.426*
		134.9	0.086*	0.144*	0.136	0.366	0.344	0.372	0.202	0.17	0.326*
		135	0.086*	0.144*	0.136	0.366	0.344	0.372	0.102	0.17	0.326*
		135.1	0.186*	0.244*	0.136	0.366	0.344	0.372	0.102	0.17	0.226*
		135.2	0.186*	0.244*	0.136	0.366	0.344	0.372	0.102	0.17	0.226*
		135.3	0.186*	0.244*	0.136	0.366	0.344	0.372	0.102	0.17	0.326*
		135.4	0.186*	0.244*	0.136	0.366	0.344	0.372	0.102	0.17	0.326*
		135.5	0.186*	0.244*	0.136	0.366	0.344	0.372	0.102	0.17	0.326*
		135.6	-0.014*	0.144*	0.136	0.366	0.344	0.372	0.102	0.17	0.326*
		135.7	-0.014*	0.144*	0.136	0.366	0.244	0.272	0.102	0.17	0.426*
		135.8	0.086*	0.144*	0.136	0.366	0.244	0.272	0.102	0.17	0.426*
		135.9	0.086*	0.144*	0.036	0.366	0.244	0.272	0.202	0.07	0.426*
		136	0.086*	0.144*	0.036	0.366	0.144	0.272	0.202	0.07	0.426*
		136.1	0.086*	0.244*	0.036	0.366	0.144	0.272	0.302	0.27	0.426*
		136.2	0.086*	0.244*	-0.064	0.266	0.244	0.272	0.302	0.27	0.326*
		136.3	0.086*	0.244*	-0.064	0.366	0.244	0.272	0.302	0.27	0.326*
		136.4	0.086*	0.244*	-0.064	0.366	0.244	0.272	0.302	0.27	0.326*
		136.5	0.086*	0.144*	-0.064	0.366	0.244	0.272	0.302	0.27	0.326*
		136.6	0.086*	0.144*	-0.064	0.366	0.244	0.272	0.302	0.27	0.326*
		136.7	0.086*	0.144*	0.036	0.266	0.244	0.272	0.302	0.27	0.326*
		136.8	0.086*	0.144*	0.036	0.266	0.244	0.272	0.302	0.27	0.326*
		136.9	-0.014*	0.044*	0.036	0.266	0.244	0.272	0.302	0.27	0.326*
		137	-0.014*	0.044*	0.036	0.266	0.244	0.272	0.202	0.17	0.326*
		137.1	-0.014*	0.044*	0.036	0.266	0.344	0.472	0.202	0.17	0.326*
		137.2	0.086*	0.144*	0.036	0.266	0.344	0.472	0.202	0.17	0.326*
		137.3	0.086*	0.144*	0.136	0.366	0.344	0.472	0.202	0.17	0.326*
		137.4	0.086*	0.144*	0.136	0.366	0.344	0.472	0.202	0.17	0.326*
		137.5	0.086*	0.144*	0.136	0.366	0.344	0.372	0.102	0.17	0.226*
		137.6	0.086*	0.244*	0.136	0.366	0.344	0.472	0.102	0.17	0.226*
		137.7	0.086*	0.244*	0.136	0.366	0.344	0.372	0.102	0.17	0.226*
		137.8	0.086*	0.244*	0.136	0.366	0.344	0.372	0.102	0.17	0.226*
		137.9	0.086*	0.244*	0.136	0.366	0.344	0.372	0.102	0.17	0.226*
		138	0.086*	0.244*	0.136	0.466	0.444	0.372	0.102	0.17	0.226*
		138.1	0.086*	0.244*	0.136	0.466	0.444	0.372	0.102	0.17	0.226*
		138.2	-0.014*	0.144*	0.136	0.466	0.444	0.372	0.102	0.17	0.226*
		138.3	-0.014*	0.144*	0.136	0.466	0.344	0.272	0.102	0.17	0.226*
		138.4	-0.014*	0.144*	0.136	0.466	0.344	0.272	0.302	0.27	0.226*
		138.5	-0.014*	0.144*	0.036	0.366	0.344	0.272	0.302	0.27	0.326*
		138.6	-0.114*	0.144*	0.036	0.366	0.344	0.372	0.302	0.27	0.326*
		138.7	-0.114*	0.144*	0.036	0.366	0.344	0.372	0.302	0.27	0.326*
		138.8	-0.014*	0.144*	-0.064	0.366	0.344	0.372	0.302	0.27	0.326*
		138.9	-0.014*	0.144*	-0.064	0.366	0.344	0.372	0.302	0.27	0.326*
		139	-0.014*	0.144*	0.036	0.466	0.344	0.372	0.202	0.17	0.326*
		139.1	-0.014*	0.144*	0.136	0.466	0.344	0.372	0.202	0.17	0.326*
		139.2	-0.014*	0.044*	0.136	0.466	0.344	0.372	0.202	0.17	0.326*
		139.3	-0.014*	0.044*	0.136	0.466	0.344	0.372	0.202	0.17	0.326*
		139.4	-0.014*	0.044*	0.136	0.466	0.344	0.472	0.202	0.27	0.326*
		139.5	-0.014*	0.144*	0.136	0.466	0.344	0.472	0.202	0.27	0.226*
		139.6	-0.014*	0.144*	0.136	0.466	0.344	0.472	0.202	0.17	0.126*
		139.7	-0.014*	0.144*	0.136	0.466	0.344	0.472	0.202	0.17	0.126*
		139.8	-0.014*	0.144*	0.136	0.466	0.344	0.472	0.202	0.17	0.126*
		139.9	-0.014*	0.144*	0.036	0.366	0.444	0.372	0.202	0.17	0.126*
		140	-0.014*	0.144*	0.036	0.466	0.444	0.372	0.202	0.17	0.226*
		140.1	-0.014*	0.144*	0.036	0.366	0.444	0.372	0.202	0.17	0.226*
		140.2	-0.014*	0.144*	0.036	0.366	0.444	0.372	0.202	0.17	0.226*
		140.3	-0.014*	0.144*	0.036	0.366	0.444	0.372	0.202	0.17	0.226*
		140.4	-0.014*	0.144*	0.036	0.366	0.444	0.372	0.302	0.17	0.326*
		140.5	-0.014*	0.144*	0.136	0.366	0.444	0.372	0.202	0.17	0.326*
		140.6	-0.014*	0.144*	0.136	0.366	0.444	0.372	0.202	0.17	0.326*
		140.7	-0.014*	0.144*	0.136	0.366	0.444	0.372	0.202	0.17	0.326*
		140.8	-0.014*	0.144*	0.136	0.366	0.444	0.372	0.202	0.17	0.326*
		140.9	-0.014*	0.144*	0.136	0.366	0.444	0.372	0.202	0.17	0.326*
		141	-0.014*	0.244*	0.136	0.366	0.444	0.372	0.102	0.07	0.326*
		141.1	-0.014*	0.244*	0.136	0.366	0.444	0.372	0.102	0.07	0.326*
		141.2	-0.014*	0.244*	0.036	0.266	0.444	0.372	0.102	0.07	0.326*
		141.3	0.086*	0.244*	-0.064	0.266	0.344	0.272	0.102	0.07	0.326*
		141.4	0.086*	0.344*	-0.064	0.266	0.344	0.272	0.102	0.07	0.326*
		141.5	0.086*	0.344*	0.036	0.366	0.344	0.472	0.202	0.17	0.326*
		141.6	0.086*	0.344*	0.036	0.366	0.344	0.472	0.202	0.17	0.326*
		141.7	-0.014*	0.244*	0.036	0.366	0.344	0.472	0.202	0.07	0.326*
		141.8	-0.014*	0.244*	0.036	0.366	0.344	0.472	0.202	0.07	0.326*
		141.9	-0.014*	0.244*	0.036	0.366	0.344	0.472	0.202	0.07	0.326*
		142	-0.014*	0.144*	0.136	0.366	0.344	0.472	0.202	0.07	0.226*
		142.1	-0.014*	0.144*	0.136	0.466	0.444	0.472	0.202	0.07	0.226*
		142.2	-0.014*	0.144*	0.136	0.466	0.444	0.472	0.202	0.07	0.226*
		142.3	-0.014*	0.144*	0.136	0.466	0.444	0.472	0.102	0.07	0.126*
		142.4	-0.014*	0.144*	0.136	0.466	0.444	0.472	0.002	-0.03	0.126*
		142.5	-0.014*	0.144*	0.136	0.466	0.444	0.472	0.102	-0.03	0.126*
		142.6	0.086*	0.144*	0.136	0.466	0.444	0.472	0.102	-0.03	0.126*
		142.7	0.086*	0.144*	0.136	0.466	0.444	0.472	0.102	-0.03	0.126*
		142.8	0.086*	0.144*	0.136	0.466	0.444	0.472	0.102	-0.03	0.126*
		142.9	0.086*	0.144*	0.036	0.366	0.444	0.472	0.202	0.07	0.226*
		143	0.086*	0.144*	0.036	0.366	0.344	0.372	0.202	0.07	0.226*
		143.1	0.086*	0.144*	0.036	0.366	0.344	0.372	0.202	0.17	0.226*
		143.2	0.086*	0.144*	0.036	0.366	0.344	0.372	0.202	0.17	0.226*
		143.3	0.086*	0.144*	0.136	0.366	0.344	0.372	0.202	0.17	0.326*
		143.4	-0.014*	0.144*	0.136	0.366	0.344	0.372	0.202	0.17	0.326*
		143.5	-0.014*	0.244*	0.136	0.366	0.344	0.372	0.202	0.17	0.326*
		143.6	-0.014*	0.244*	0.036	0.366	0.344	0.372	0.202	0.17	0.326*
		143.7	-0.014*	0.244*	0.036	0.266	0.444	0.372	0.302	0.17	0.126*
		143.8	-0.014*	0.244*	0.036	0.266	0.444	0.372	0.302	0.17	0.126*
		143.9	-0.014*	0.244*	0.036	0.266	0.444	0.372	0.202	0.07	0.126*
		144	-0.114*	0.144*	0.036	0.266	0.444	0.372	0.202	0.07	0.126*
		144.1	-0.014*	0.144*	0.036	0.266	0.444	0.372	0.102	0.07	0.126*
		144.2	-0.014*	0.144*	0.036	0.266	0.444	0.372	0.102	0.07	0.126*
		144.3	-0.014*	0.144*	0.036	0.266	0.444	0.472	0.102	-0.03	0.126*
		144.4	-0.014*	0.144*	-0.064	0.166	0.444	0.472	0.102	-0.03	0.126*
		144.5	-0.014*	0.144*	-0.064	0.166	0.444	0.472	0.102	-0.03	0.126*
		144.6	0.086*	0.244*	-0.064	0.166	0.344	0.372	0.202	0.07	0.126*
		144.7	0.086*	0.244*	-0.064	0.166	0.344	0.472	0.202	0.07	0.126*
		144.8	0.086*	0.244*	-0.064	0.266	0.444	0.472	0.202	0.07	0.126*
		144.9	0.086*	0.244*	0.036	0.266	0.444	0.472	0.202	0.07	0.126*
		145	0.086*	0.244*	0.036	0.266	0.444	0.472	0.202	0.07	0.126*
		145.1	0.086*	0.244*	0.136	0.366	0.444	0.472	0.302	0.07	0.126*
		145.2	0.086*	0.244*	0.136	0.366	0.444	0.472	0.302	0.07	0.126*
		145.3	0.086*	0.244*	0.136	0.366	0.444	0.472	0.202	-0.03	0.126*
		145.4	0.086*	0.244*	0.136	0.366	0.444	0.472	0.202	-0.03	0.326*
		145.5	0.086*	0.244*	0.136	0.366	0.444	0.472	0.202	0.07	0.326*
		145.6	-0.014*	0.144*	0.136	0.366	0.444	0.472	0.202	0.07	0.326*
		145.7	0.086*	0.144*	0.136	0.366	0.444	0.472	0.102	0.07	0.326*
		145.8	0.086*	0.144*	0.136	0.366	0.444	0.372	0.102	0.07	0.326*
		145.9	0.086*	0.144*	0.136	0.366	0.444	0.372	0.102	0.07	0.226*
		146	0.086*	0.044*	0.136	0.366	0.444	0.372	0.102	0.07	0.226*
		146.1	0.086*	0.044*	0.136	0.366	0.344	0.272	0.102	0.07	0.226*
		146.2	-0.014*	0.044*	0.036	0.366	0.344	0.272	0.102	0.07	0.226*
		146.3	-0.014*	0.044*	0.036	0.366	0.344	0.372	0.102	0.07	0.126*
		146.4	-0.014*	0.044*	0.036	0.266	0.444	0.372	0.202	0.07	0.126*
		146.5	-0.014*	0.044*	0.036	0.266	0.444	0.372	0.202	0.07	0.126*
		146.6	-0.014*	0.144*	0.036	0.266	0.444	0.372	0.202	0.07	0.126*
		146.7	-0.014*	0.144*	0.036	0.266	0.444	0.372	0.202	0.07	0.126*
		146.8	-0.014*	0.144*	-0.064	0.266	0.444	0.372	0.202	0.07	0.126*
		146.9	-0.014*	0.144*	-0.064	0.266	0.544	0.472	0.102	-0.03	0.126*
		147	-0.014*	0.144*	0.036	0.266	0.544	0.472	0.102	-0.03	0.126*
		147.1	0.086*	0.244*	0.036	0.266	0.444	0.472	0.102	0.07	0.126*
		147.2	0.086*	0.244*	0.036	0.266	0.444	0.472	0.102	0.07	0.126*
		147.3	0.086*	0.244*	0.036	0.266	0.444	0.472	0.102	-0.03	0.226*
		147.4	0.086*	0.244*	0.036	0.266	0.444	0.472	0.002	-0.03	0.226*
		147.5	-0.014*	0.144*	0.036	0.266	0.444	0.572	0.002	-0.03	0.226*
		147.6	-0.014*	0.144*	0.036	0.266	0.444	0.572	0.002	-0.03	0.226*
		147.7	-0.014*	0.144*	0.036	0.266	0.444	0.572	0.102	-0.03	0.226*
		147.8	-0.014*	0.144*	0.036	0.266	0.444	0.572	0.102	-0.03	0.226*
		147.9	-0.014*	0.144*	0.036	0.266	0.444	0.572	0.102	-0.03	0.226*
		148	-0.014*	0.144*	0.036	0.266	0.344	0.472	0.102	0.07	0.226*
		148.1	0.086*	0.144*	0.036	0.266	0.344	0.472	0.102	0.07	0.226*
		148.2	0.086*	0.144*	0.036	0.266	0.344	0.472	0.102	0.07	0.226*
		148.3	0.086*	0.144*	0.036	0.266	0.444	0.472	0.102	0.07	0.226*
		148.4	0.086*	0.144*	0.036	0.366	0.444	0.472	0.102	0.07	0.226*
		148.5	0.086*	0.144*	0.036	0.266	0.444	0.472	0.102	0.07	0.226*
		148.6	0.086*	0.144*	0.036	0.266	0.444	0.472	0.102	0.07	0.226*
		148.7	-0.014*	0.044*	0.036	0.266	0.444	0.472	0.102	0.07	0.226*
		148.8	-0.014*	0.044*	0.036	0.266	0.444	0.472	0.102	0.07	0.226*
		148.9	-0.014*	0.044*	0.036	0.266	0.444	0.472	0.102	0.07	0.226*
		149	-0.014*	0.044*	0.036	0.266	0.444	0.372	0.002	-0.03	0.226*
		149.1	-0.014*	0.044*	0.036	0.266	0.444	0.372	0.002	-0.03	0.226*
		149.2	0.086*	0.144*	0.036	0.266	0.444	0.372	0.002	-0.03	0.226*
		149.3	0.086*	0.144*	0.036	0.266	0.444	0.372	0.002	-0.13	0.226*
		149.4	0.086*	0.144*	0.036	0.266	0.544	0.472	0.002	-0.13	0.126*
		149.5	0.086*	0.144*	0.036	0.266	0.544	0.472	0.002	-0.13	0.226*
		149.6	0.086*	0.144*	0.036	0.266	0.544	0.472	0.002	-0.13	0.226*
		149.7	-0.014*	0.144*	0.036	0.266	0.544	0.472	0.002	-0.03	0.126*
		149.8	-0.014*	0.144*	0.036	0.266	0.544	0.472	0.002	-0.03	0.126*
[truncated: 5,501 more rows]
