# Supplementary material for: Effects of common mutations in the SARS-CoV-2 Spike RBD and its ligand, the human ACE2 receptor on binding affinity and kinetics
Source: eLife. 2021 Aug 26;10:e70658. doi: 10.7554/eLife.70658 (PMC8480977; doi:10.7554/eLife.70658)
Supplement: Figure 4—source data 1. [file elife-70658-fig4-data1.xlsx]

## Sheet: Figure_4_A
			Rep 1	Rep 2	Rep 3	Rep 4	Rep 5	Rep 6	Rep 1	Rep 2	Rep 3	Rep 4	Rep 5	Rep 6	Rep 1	Rep 2	Rep 3	Rep 4	Rep 5	Rep 6
			KD WT/KD						kon/kon WT						koff WT/koff
		S19P	3.43332	3.72576	3.52058	3.80849	4.26726	3.67623	1.52514	1.62615	1.5429	1.68498	1.93251	1.65279	2.24429	2.28418	2.27485	2.25337	2.20142	2.21749
		K26R	2.13883	2.24111	2.36479	2.33272	2.81457	2.42077	1.5984	1.62837	1.76268	1.75269	2.12565	1.81596	1.33403	1.3721	1.3375	1.32688	1.32007	1.32899

## Sheet: Figure_4_B
		Mean	SD	Mean	SD	Mean	SD	Mean	SD	Mean	SD	Mean	SD	Mean	SD	Mean	SD	Mean	SD	Mean	SD
		N501Y		E484K		E484K/N501Y		K417N		K417N/E484K		K417N/E484K/N501Y		K417T		K417T/E484K		K417T/E484K/N501Y		S477N
		-0.1	0.08	-0.08	0.08	-0.12	0.08	-0.06	0.09	-0.08	0.11	-0.03	0.07	-0.12	0.1	-0.06	0.09	-0.07	0.07	-0.46	0.09

## Sheet: Figure_4_C
		Mean	SD	Mean	SD	Mean	SD	Mean	SD	Mean	SD	Mean	SD	Mean	SD	Mean	SD	Mean	SD	Mean	SD
		N501Y		E484K		E484K/N501Y		K417N		K417N/E484K		K417N/E484K/N501Y		K417T		K417T/E484K		K417T/E484K/N501Y		S477N
		-0.1	0.08	-0.15	0.08	-0.16	0.1	-0.08	0.1	-0.14	0.11	-0.16	0.08	-0.16	0.13	-0.19	0.09	-0.16	0.08	-0.13	0.09
